# Supplementary material
Source: HighWire-hosted journal article supplement (https://jmg.bmj.com/content/jmedgenet-2018-105825)
Supplement: inline-supplementary-material-1 [file inline-supplementary-material-1.xlsx]

## Sheet: Table S1
Table S1. Patient Enrollment Eligibility Criteria
Inclusion criteria:
(1) Patients with lung occupying disease to be treated by surgery, or pathologically confirmed lung cancer patients, regardless of pathological type
(2) For patients with confirmed lung cancer, can provide surgical or biopsy pathological tissue samples containing enough cancer cells (>30% by HE slide examination)
(3) Age 18-80 years old
(4) Sign the informed consent form and agree to strictly follow the follow-up procedure
Exclusion criteria:
(1) History of malignant tumors
(2) had anti-tumor therapy before surgery
(3) Cannot cooperate with research plans
(4) pregnant or ready to conceive
(5) Participated in other cancer drug clinical trials within four weeks
(6) The quantity or quality of the blood sample is unqualified
(7) Other situation where investigators believe that it is not suitable for enrollment

## Sheet: Table S2
chromosome	start	end	gene	cover long	seq
1	43814949	43815041	MPL	93	GACCGCTCTGCATCTAGTGCTGGGCCTCAGCGCCGTCCTGGGCCTGCTGCTGCTGAGGTGGCAGTTTCCTGCACACTACAGGTACCGCCCCC
1	115251095	115251215	NRAS	121	ATTGCCCAATACTATATACTAAGATTTGTAATTATGCCAAGAAACCATATGCTCACCTTGTTACATCACCACACATGGCAATCCCATACAACCCTGAGTCCCATCATCACTGCTGTTGAG
1	115251215	115251335	NRAS	121	TTTTTTCATTCGGTACTGGCGTATTTCTCTTACCAGTGTGTAAAAAGCATCTTCAACACCCTATAAAAGGAAAAAATGAAAAAAAATGAGAGAGCTAGCTCAACGGACACAATCCAAATT
1	115252149	115252269	NRAS	121	GATGCAAACTCTTGCACAAATGCTGAAAGCTGTACCATACCTGTCTGGTCTTGGCTGAGGTTTCAATGAATGGAATCCCGTAACTCTTGGCCAGTTCGTGGGCTTGTTTTGTATCAACTG
1	115252269	115252389	NRAS	121	TCCTTGTTGGCAAATCACACTTGTTTCCCACTAGCACCATAGGTACATCATCCGAGTCTTTTACTCGCTTAATCTGCTCCCTAAAAACGGGAATATATTATCAGAACATAAGAAAAACAA
1	115256389	115256509	NRAS	121	ATCCTTTCAGAGAAAATAATGCTCCTAGTACCTGTAGAGGTTAATATCCGCAAATGACTTGCTATTATTGATGGCAAATACACAGAGGAAGCCTTCGCCTGTCCTCATGTATTGGTCTCT
1	115256509	115256629	NRAS	121	CATGGCACTGTACTCTTCTTGTCCAGCTGTATCCAGTATGTCCAACAAACAGGTTTCACCATCTATAACCACTTGTTTTCTGTAAGAATCCTGGGGGTGTGGAGGGTAAGGGGGCAGGGA
1	115258665	115258785	NRAS	121	CTCACCTCTATGGTGGGATCATATTCATCTACAAAGTGGTTCTGGATTAGCTGGATTGTCAGTGCGCTTTTCCCAACACCACCTGCTCCAACCACCACCAGTTTGTACTCAGTCATTTCA
1	157800690	157800810	CD5L	121	AGAGAGGCAATTGTTGAGACTGTGAAATCTGATTTATTAGATAAGTGTAAATGTGTAAATGTAGCCGTATAATAAGTACTCAGCCTAGCCTCAGAATCTAAAGTTGTCAATTTTTACAAT
1	157800810	157800930	CD5L	121	CAAGTCTTGATTCTCTTATTTCTGTCTTGCCTCAAGCTTACAGGCCCCAAAGTCTCAGTTGATAAAGTGAAAATGATATTTTTCACTTTCGCTTGGCATAAGACACAACTTTAGCCCTCC
1	157800930	157801050	CD5L	121	CTGATCTCTTTCTGCCTCTTTCTTGACCTTTTCCCAGTAACCAATATATTTTTCTTTGAATAAAGTAAAATGTATTTTTGACATTCCTCTCATTAAATGTCAACCATGTTGGCAGGTTGT
1	157801050	157801170	CD5L	121	ATAGGGATGGACAACAAAGATTTTTATTGGGGCAATCAGAGGATGAAACATCATTTTTTACACGTCATGAAAAGGTCTAGGATTATAGGACGCTGCTCTGCTCCTGAAAGAATTGTCTAC
1	157801170	157801290	CD5L	121	CTACACTAAGAAATAACAGAATAGGGAGGTGTTGCTATTGTGGTCACCTGAAGCTTGAGGAAAAAAAAAAAAAGTAGTCCAATCAAAAGAATTCTAAACTTTCCCCCAAGTTGCAAGAAA
1	157801290	157801410	CD5L	121	TTGTCTACCCACATTTTCTTTCAAATGTTCCTTTCATTGTTTCATTCCTTTAATGTTTGCAGACATAGATTAGTAATAGGACCTAGATTAGTAATGTTTGCAGACATAGACCTTAGTAAT
1	157801410	157801530	CD5L	121	GGTCTGCACATCTGACCAAAGTGACAGGTTTGAGGATTCCAGGCAGCTTGAGAAAAGGCAGGAAAGGCCAGAACCAGTGTCAAAGGGTCAGGGTTGAGCACAGGATACATGGAAGCTCAT
1	157801530	157801650	CD5L	121	CTTCCCCAGCAAGAGGGAACTCAACAGCTCACATCTACAGGCAGCAATGGGGGCTGCTTGTCCCTGAGAGTAAGGCATAAGCCCAGTGTTCAGACTCCTGAGGGGATGAGGGAGTAGTGG
1	157801650	157801770	CD5L	121	CTCAAGCCTGAGCCCCAGAATGAGTATGAGGATAATCAGGGCTCAGGAGAACAAGCAGAGGGCAGGCGGGGCCAGGGGGGCCAGGTCAAGCAACACCAGGATACTATCCTATAAAGAGAA
1	157802962	157803082	CD5L	121	CTCCATCTGTAGGACTCACCTGAGCAGATGACAGCCACATCTTCCTGGTGGGTGCAGTCGTGAAACCCCCAAAATCTGTGCTGGCACTGCTCCAGGGACTGCTCCTCCCCTGAGCAACGA
1	157803082	157803202	CD5L	121	ACATTATCCAGCCAGATGCGGCCAACCCCAGGGCCATAGCATTTCCGGTCTCTGAAGGAGGGAGAGAGGGACTTCCCACAGCCCAGTTGCTTGCATACCACCTGGTCCTCCTTTTCTCCC
1	157803202	157803322	CD5L	121	CAGTTGTCATCACAGACAGAGCCCCATACGCCCTTGTGCAGCACCTCCAGTCGCCCAGAGCAGAGGTTGTCTCCTCCTACTAGTCTCAAGTCAAAGGGATCTGCAGGATGGGGGAGGAAG
1	157804187	157804307	CD5L	121	AGGCATTACCTTCACATTCGACCCACGTGTCTTCATCATGGTTGCAGGTGTTCTTCCCCCAAGGCCCAGAAGGGCAATCCTGAAGGGTTGCTTCTCGTCCTGAGCATGACATCTGGCTCA
1	157804307	157804427	CD5L	121	GCCAGATGGGTTTTCGGCCATAGGCATGCTTGTTGCAGCGTTTTTGAGTCAGTACAGCCCTCCCACATCCCAGCTGCCGGCACACCACCTTTGCGGCCCGGAGGCTCCAGCCTGTCTGGC
1	157804427	157804547	CD5L	121	ACACGGTATACCACTGGTTCTGGTGCTTCACTTCCACGCGTCCCTTGCAATGCCCAGGGCCGTCAGCCAGCCTGACACCCTCTGGGACTGGGGAGAAAGAGCTCTCTGGGTCTGAGGGGA
1	157805605	157805725	CD5L	121	GGACCCCTGCCATACTCACTCTCACACGATGCCCCAGCATCTTCATCATGTGAACAATCATAAACTTCTTCTTGCTCACACTGAGCCAATGTATCTTCTGTTCCTGTGCAACTGACTGAT
1	157805725	157805845	CD5L	121	TGGATGAGGACCTTTTGCTCTTTTTCTGCTGGTGGCTCATACAAAATACCACTAGGGGTTCCGCTGGCAGCTCCACAGCCCAGCTCCCGGCACAACACAGCCACGTCCTTAATGTCCCAG
1	157805845	157805965	CD5L	121	CCGTCATCACACACGGTGCCCCACTGGCCTTTCTGTTCCACCTCCACCCGCCCTTCACAGCGGTGGAGGCCCCCCACCAGCCGCACTCCAGATGGAGACGCTGCAAAGAGACGGGTTGTT
1	157809126	157809246	CD5L	121	TCTCCTAAGCTTGAGGCCTCCCTCTCAGAAACCCCCAAAAATCTTACCTAGGAATCCAGGTCTGGTGCAAATGGCTGGGGAAGAAAGAAGGAAATGAGTGAGGTCAATTTCCAAGGCTTT
1	157811417	157811537	CD5L	121	GCCAGAAAACTCTGAAGCCTAAACCAACAGGTGCAGAGATACTCACCAAGGATCAAGGAGAATAGCAGAGCCATGACCAAGGCAGGTGAAGGTGATGAGCTGAAATTTAAGGCTAGAAGG
1	158580996	158581116	SPTA1	121	CCCCCAGTAAATTTCCCACGACACTAAGATTTTCTACGATCCACGAGGAGCTGCTTATTAGTTGCCAAAGTAGGAATTGGTGAAGCCAACGTAGTCATAGCCAGAGAGATGGCTTCGACC
1	158581116	158581236	SPTA1	121	CCGTGGGTCCATATATTGCTGCATATGTGTGGCACAGAATGACACTTGCTCTGGGGTAAGGGCCTGAAAAGTATAAAAAGAGAAAAATACAGTTATAGGGATTCAAAATAGCTGGTTCCT
1	158582559	158582679	SPTA1	121	TTCAAATTAGGATGACAGTGTAGTAGGGGAAGCAACCAGAATCGGACCTGCTTCATGTCTTCTTTGGTAATATATGACTTGCCCTCTGCCAGGGCTTGGAAGGCATTCTCTATTTCATCA
1	158582679	158582799	SPTA1	121	CTGGACTTGATGTTTTCTGACTCCTTGTCAATCAGGAAAGCAGTATAGTCCTCCAGTGAGACATAGCCCTTCCTGTGGGAGAAATGGATCAGGAGCTGAGCCTTCTCAAGGCAGAGAAGG
1	158583463	158583583	SPTA1	121	CCAAACCCCCATCCCTGCTGCGGTCTGACCCTTAGTCTTGTTCCTACCTCCCTGGATCCACAGCATCCAGGAACTTCTCAAACTTGGGCTCATGTTCATCCTCCTCCACCATGGGCAAGT
1	158583583	158583703	SPTA1	121	AGTAATTGAGTCCTCTCAGGCAGGACCGGAACTCTTTGTGAGTCAGGCGCCCTGTCAAATTCTCATCAAAGTGTCTAAAGGATAAAAAAAGAAAAAAAAATTTATCAAGCTCAATAGAAA
1	158584009	158584129	SPTA1	121	CAAAGAAGCAGTTAACTATGAAATTATACTCACTTATAGATTGTGCTAAATTCCTTTAGAGTCTCTTCACTCACACCTTTGATGTCCCTGAAAGAAAAAAAAAAAACATGAATTTTCCCT
1	158584979	158585099	SPTA1	121	CTGCTCTGGCCACACGCCCTCAATACTTGGCCTGGATCTGTTGCTCCAGGTTGTGTTGCATCCGCAACCCAAGCTGGTAGAGCTGGTCCCACTGCTGAGCCAATCCAATGGTGCTGTATT
1	158585099	158585219	SPTA1	121	TGATATCAAGGATCAGAGCGTCTTCCAAGTTGTCCCCCAGGTCCACAATCTTGGTTAGTTGACGCTTCATCGCCTGGATCTCCTTCTGTTTTCTCTGGAAAAACGACAGAGAAGAGAGAC
1	158587292	158587412	SPTA1	121	CAATATCTTCAGTTAATGAAAAAACAATACTTACTTTATTTGCTTCCAGCTGAGATTCCAGAGTTCCTGTTTCTTTGAGCAATGATCTAGTTAAGAACCGAAGGAAATCATTATGCATCA
1	158587777	158587897	SPTA1	121	CTTCCATAATAATATAATAAAGCAAACATGATGATAACATAAAATACTGACCCATCCAGAAAGTAAGCCCTGGACATGGAGGTCCGGAACAGGAATCACATGAGAGAAAAGGGAGATGAT
1	158589008	158589128	SPTA1	121	CACCTGGTTTCCAGGATCCATTGAAGGAAGGTACTGGCATTCTGTTCAAACTCCTGACACATCTCAAAGTTCTTGACCTGTCTTGCCTCTTCCTTTTGCAGCTCCTGCTCCCGTTCCTAA
1	158589928	158590048	SPTA1	121	GAAAGGAAGTTTCTGCCGTGTTCCAGGTTACCTCAATGATGTCAGATAGGTGCTTCCAGGTCCTTTCCAGCACCTCCACTGTTAACCAGGTATAAGGGCTGGAAGGCACACCTAAGGCCT
1	158590048	158590168	SPTA1	121	TAATCTGCTGGTCTAGCTCCAGCAAACATTTAAAGTCTGCTTGAGCCCTAGCCAGGGAGGCCAAGAAGTCCTCATGGTCTTTCTGCAGCTGCCGAATTTCATTCAGGGAGACACAGTGCA
1	158590168	158590288	SPTA1	121	CAGGCTCTGACAAGTTTTCTTCCATCTTTTCACACCAGTTGTTCAAAGCTGAAGCCTTATGTGCAAATTCCACGAACAGGTCCTCAGCCTGCAGAGAGAAAAAAAAGACACTACCATCTT
1	158592757	158592877	SPTA1	121	ATAATTTTTTTAAACCTTCTGTAGAGGCAGCTGTTTCTCCAGCAATTTCTGTCTGTGGACTGCCGAGGCTTCCAGCAACTGTTCCCAGCGCTTCAGCAGAGCGGCATAACGCTCTTCAAT
1	158592877	158592997	SPTA1	121	GGCTTTAGACTGGTTGTGTTGAGCAGAAATCAGTTTGTCCTTCAGGTCAGTGATCTCGGGAAGTCTCTCTTGCTGGAAACTCTGCAGACTGGCATCCAGAGTGTCCTGAGAAAGATCAGG
1	158595914	158596034	SPTA1	121	CCTAACATCTATCAATCTCACCTGTTTTGCCAGAAGAGTGAGGAAGTCACCAAGGTCTGCACCATTGCCATTGGTCTTTAGGCTTGTTTCCTTATCAGCTAAAAGGCAAAAACAATTAAG
1	158596593	158596713	SPTA1	121	CAAACCCAAGGGACCCTGAACCTGACACATCATACCTATCCAAGCCTCTACCACATCAGCCTTCCAGTTGAATTCCTGAAAGGCATAATCGTCTTCCAATTGCAACTTCCAAGCAGCTAT
1	158596713	158596833	SPTA1	121	TGCCTTAGCCAGAGAAGGGGTCTTTTCATTCAGAGCCTCTATCTTGGAAGAAATCTCTTTGTTCTGACTTTCCTCCTGCAACACCTGTGAGAAGGGGAGAGACAAATATATTTATAATGT
1	158597403	158597523	SPTA1	121	AACTAGCTCACCTTATTTAGGATGTCTTCTCCTTGTGCACACACATTTTGTACTCGGGTCTCATGGACAGCAAAGTCATTTTCCAAAGCTTCATGCTTCATTAGCAAGCTCTGCATAAAT
1	158604279	158604399	SPTA1	121	GAAAATAACCAAATTGAAGAGAAGAAAATTGATTCATTCTTCCTGTTCCTCACCTGAGTAGCAGCTAATGTATCTCCACAATCTCCTCGGACAGCCAAAGCATTCTTTTCATTGATCCAA
1	158604399	158604519	SPTA1	121	GCTTCCTCTTCCTCAGCATTCTGCATGAATTGCAAGTATTCTAGGGATTCTTCCAACTTAAGTCCTCTATAACAAGGTGGCAAGCCCCAGTGAGGATAAGAACAAACTGGTAAGCAGTGG
1	158605643	158605763	SPTA1	121	AACACCTGCCCAATATCCAAAATCCAGGAAGGGAACTGGGCCTTCTGTATCCCACTCACCGGGCCTTGGCCAACTCTTTGAGCTTCTCCCAGTGTTCAACAAACTGAGCCAGCCGCAACT
1	158605763	158605883	SPTA1	121	GGATCTCCTCTTGCCCCACAGCAGCCTTGTCTTTCAGCTTCTCTGCCATATCCAGCACATTCTGAAGAACAACCCCGATACATGTTCCATTACCCCACAATCTCTCCCCATTTAGCCATA
1	158606403	158606522	SPTA1	120	ttttcagatctggtattctatTCCTACCTGGATGGCAGGCTCATGGGCCACCAGCTCCCCCTCTAGGCGTTTGTGCTTCTTCAGCAAGTTCTGAACCCCCTGAAGATCTCTCCCATAGT
1	158606522	158606642	SPTA1	121	CCTGGGAGCTCACTCGTATCAACTTCTCCCTAAAATCAAGGAAGAAAACAGAAAGTTTGGAGTCTAGACATCTAATGTCATCCTACAGCAATAGCTTTCTATGACTATGTGTGTGGCTGG
1	158607807	158607927	SPTA1	121	GCTGGTGGCACATACTCTATCCAGGATTCCTCATCATCTAGATCCTGGAAGAACTGGAACAAGGCATAGGCCTCTTTCAATTTTTCGTGGTGTGCAGCTGCCAATTCTTGGACATTCAGG
1	158607927	158608047	SPTA1	121	AAACGCTTGTTGACATTATCTTTTTTCTTCACAATCTGATCAACGTTGAAAGTCCCGCTGGAGAGCAAATCTTCAGCCAATGTATTCAGGTCCTTGAGTGCATCCTAGAAAGTCTCGGGA
1	158609364	158609484	SPTA1	121	TACTTACCTCTCGAGCCAACATCTCTCTCTCCAATAGCTGATGCTTCTTGAGTAGGTTTCCTGCTGAAGCCAAGTCCCTGGCCTGATCTTTCATGGCCAGCAATGTCTCTGCCTGGAAAT
1	158609608	158609728	SPTA1	121	GACAAGTATGTATTAAACTCTTGTGTCTCTACTGTTTCCGGGTGCAATTACCTCTGAGAGCCAGAACTCAAAGTCCCGGATGCTTGTGTTGAACCTCTGTTGACGACTGGCCTCATTGAG
1	158609728	158609848	SPTA1	121	CTTCTTCCCTTTGTCATTTGTTCTCTCAAGCAGATGATCCCAATGTTCCTTCAGCTGTTCCAGTTGCTCCTAACCCAAGGAGAGTGAGGAGTCATTACAATCTTTAGGATCCCGGGCCCT
1	158612146	158612266	SPTA1	121	TAAATGATTCCTCTTCATGTGACTTTGTAGCCCAAAACTCATCCTGAGCTTTACCTTCATGGCCTCTTCATTGCCATCACAAGCGCTACACTCAATCAGGGAGTTCCCCAGGTTGATGAC
1	158612266	158612386	SPTA1	121	GCCATGCACCTGCTCAGATCGGCCATCGACTTCATGTGCAAAGGTCTGGTGTTTCAGGTATTTCCTCTGAAGGGAAAATGAAACAGAAATTATATTATCTTTTTATTTATGGTGACAAGA
1	158612564	158612684	SPTA1	121	GAATGGTGAAATTTTCCAAGATTCCTATTTTGAACTTGCCTGAATGTTAGTGGCGTCTTTGTAGGATTCATCACAGGCTGTGGGCAGCATCTCACTGATCCATTCTTCCAGCTCCTCAAG
1	158612684	158612804	SPTA1	121	GTCTCGGTAGAATTGTTTTAGGTTGGCATAGTCTCCAAGCTTTGTCCGCTCATCAATCAGTTGTGCTTTGAGAGCCTTCCACCTAGAGGACGGAGCCAAATCACTCTATGCCCTCCTCCA
1	158613103	158613223	SPTA1	121	GGCCTGACCTGTCTAGTACACGTTGGAGCCGCGTAGCAATCTCTTCTTTGGCATAGTGTTCATCAGCAATGAGGCTCTCAGCAAAATGTTCTAGGTCAGTGATCTTCCCTTCCTAAATAA
1	158613994	158614114	SPTA1	121	attATTACTACGGATTATTATTTTAATTCCTTTACTAGTCATTATTACCTGGGCAGTGATTGCTTTGTCCAAATCGTCCCGTTTCTTCATCAAAGCCTCCAGACTGTCTAAGGAACTTTT
1	158614114	158614234	SPTA1	121	GTCATCTGACCTCAGGGAATTCTCACGTGCCACCATCCAGCTCTCAACTTGATCACAGTTCCCCTGGAACATCTATGAGGAATCAAATGAGAGGGGTATGGTATAGTCCATGTGGTGTGG
1	158614956	158615076	SPTA1	121	CAATTGGGAAATTTGCTGTACCTGCAACTCCAGGCACTGGTCTAGGATCTTCTTGCGTTTTTCCCAAGCCTTCTCCAAATCATCTCTCTCTAGCTTGACAGCTTGAAGCTTTTTTTCAAT
1	158615076	158615196	SPTA1	121	TTCAGGGCTAGCATGGTGCCCACTGTCGATAAGTTCTGCACTGAAGTCCTCTAAGGCCTGGAAGGTGGGAGCCTCTGCCTCCATGTCAGCACGGTGCTCCTGTGGGAAAAAGGGGGAAGA
1	158615274	158615394	SPTA1	121	GTAGTTTTACCTGATGTCTCTCCAGCAAGATCTCTATGCCAGTTAAGTCTTCGGCCAGCTCCTGTGATGATACCATGCCACCAATGCTACTGATCCAGTTCTGCAGATCCCTAGATAAAC
1	158617299	158617419	SPTA1	121	AGACACGGAAGTTACCCACCCCACTCTACCTGGCCTTGCTGAGGAACAGGTAGAATTTCTGGGCCTCATTTAGGCTCTCCTTACGATCCTTTGTACGCCCCTGCAGGTCTTCCCAGGCCT
1	158617419	158617539	SPTA1	121	CATTCAGCTCCATTTTCTGTCTCTGCAGGTCCTCAGTGGCATCTGGATGGGACTCACTGAGCCGCTCTGCTGTCTCCCCCAGTATGGTCACCTGGGGAGGTACAATAGCTCTGATAATCA
1	158618251	158618371	SPTA1	121	AATATAGACTGGAAAGTGTTGGAAAAGCTTTGAAGGACTTGTCTCACCTTATCTCCCAGGGGTACGAGGTCCCTTTCAAAGCCCTCATGCCGTCGCTGAAGAGCCTGAACACTGAACAGA
1	158618371	158618491	SPTA1	121	TCTGAGCCAGGGTCTGCAGCACTGAGGGCCTGGCATTTCTTCTCAATCTGCTCCTTCGTGTCATCTGCTTCTCTGGTATACAAGAGAGTAGAGAGTTCAAAAGTAAGGATATGTACCAGA
1	158619631	158619751	SPTA1	121	GTTATAATTATTACCTGTGAAACACTTCAACAGCATGGGCACTGCCCAGCAGCTGCCGCTGTTCATCTGCAAGCCTCTGCAAAGAACCCCAGCGGGAATTCAATTCCTAAAAGAGGCAAA
1	158621147	158621267	SPTA1	121	CTTAGTTACCTGCCGGATTTGAGCTCCTTCTGGTGTTAGAAGTCCTTCAAATAGTAGATCATCAGCTACCTTGTTGATATCCCTTAGCCGAGGCTCATTGGTATTCAAATCCTGAATGGG
1	158622229	158622349	SPTA1	121	CTTCAAGAGAAGGTTCCTCTTTCTCACCTTTTGGAACTCATCAAACTTTTTCTGCAGCTCCCAAACATCATCTAGTTCCACTCCAGTGTTTTCTGCCTTTTTCTCTTGAATCCATTCCAG
1	158622349	158622469	SPTA1	121	CATGTCTCCTGCCTCATAGGCCAATAAAAATTCATTATAACGTTGCAATAGACGACGTCTGCGTTCTTCTGCCCGATCCAAGAGGGAGCGGTATCTGGATGGAGAATTGGGAAAAGTGGA
1	158623019	158623139	SPTA1	121	TGTCTGACCAAATACTGTTCAGTTCTCCAGGCTCCAGAACTTACTGGTTCTCAATCTGCTCCTGGCGCTGGGTGATGTTTCCTGGCTCTTCTCGTCGCCGCTGTGGGAGCATCGGGAACT
1	158623139	158623259	SPTA1	121	CATCGTGGGCCAGTCTTCTGACATAGACAGCTGGGACAATGCCCTGATGATCAGCAGCTTCCACCTTCCACCAGTCCTGAAGGGAGAGCAGATCCCCACTCCGTCATTAATTCTTGGAAA
1	158624349	158624469	SPTA1	121	ATGGTTCTGAAAGAGCCACTTTTTGATGGAAAGATTAGAAGGAAAAGTCACCTTATTGATGGAACTGAGCAGCGTTAAGACATCACCTTTCTTCATGGTGACTTCTCGGGGGCTGCGGGC
1	158624469	158624589	SPTA1	121	CTGGAAGTCATATAAAGCCATGACCCTTTGTTCTCCAGCAACTCCCTCCACTGGTGCAGCCTGTTGTTGCTGAATAAAAACAGGAAGCAGGTGTCAGTCACGCACTGGAAATATCTCCCT
1	158626340	158626460	SPTA1	121	AAGTTAGTCTTACCTGGCAGGCGTTTGCCTGATTCCGCAGAGCTTTCATACTGTCTCCAAATGAATTGAGATCTAATAGAAAGGCCTCATGCTTCTTTAGAAGAGCCTGCATTTATTGAT
1	158627255	158627375	SPTA1	121	CCCCACCTTACCCCAGCTGCTTCTTCATCAGCACCATAGTTAGTATTATCTACAATAGGTTCCTTCTCTCTGATCCATGTTTCTGCTTCATGCAGGTCAGCCAGGTACTGCTGGAACTGG
1	158627375	158627495	SPTA1	121	ACATTGGCTTCAAGATCATTTTGTCGCCTAGCAGCTCGAGCACGGAGAGACTCCATATTCTGGTTCAAACTCTTGACCCTAGAGGCCACATCTTCTGCAGCAAAGTGTCCTATGGAGTAA
1	158631017	158631137	SPTA1	121	TTCTTCCCAGAGGTCTGGCCTGGTGATGTTTTGTCCAACTGAATCTCAATCATACATACCTTCCTCTACCATTTTGTTTCCCCTTTCTGTTATCTCTTGAATGCGTGGTTCATGGCTGGC
1	158631137	158631257	SPTA1	121	AATGTTCTCCAGGATGACTCTATGCCTATTCAGAAGCTTTTTGGAAGCAATCAGGTCCTTTCCTGCAGAGGAAAGGAATTTCAAAGTTTCGGATTATCCTGGTGTATGGAAGTAGCATAC
1	158632433	158632553	SPTA1	121	CTCAATATATAGACCTTGGTCCTTTCCTAGTGGCTCAGCCTGCTCAGGCTGTACTAACCAAGGTAGGTGGAAGTAGCTGAGGGTTCAGTCTCTTGGATCCAGGCCTCCTCATCCTCTGTG
1	158632553	158632673	SPTA1	121	TCTCTACAAATCAGCTGCAGATGGAGAAGGTCTAAGAGCTTCTTCTTTCGGGTGGCCAGTGGCTCTTTCAGAGCTTCAAATCGGCATACCAAGGACTCTTGCCTTGCCCTTATATCCTTA
1	158632673	158632793	SPTA1	121	GAATCAGGATGGCCTATTTCTTCAAAATATGCAGCCAGGTCTGTAAGGATATCCACCTGATCCTAAGGGAGAAATAGAATGAATGCGAAGAAATCCCATCATTTAGTAGGAAGTAATAGG
1	158636076	158636196	SPTA1	121	TATGGCTGGCCAAAGAGCTAACAACAAACCTGACGAGCAGCCACAGCCGACTCCAGGAGGCCGTGTTTCCTGAGTCGATTCTGTACCTCGGCCAGGCCTTTCCCATAATCCTCAGAGGTG
1	158636196	158636316	SPTA1	121	ACTTGCCACTCAACATCCTCCAGCCAGCGCTGCAAATCTTCTGCATTATTTTCAAATTGCAGCTGCTGGTTGGCCTCATGCAACTGGGTCCCTGGGAGAAGACATAAGGTAGAAGACATT
1	158637630	158637750	SPTA1	121	AAACCTCTGCTTTTTACCTTTCTGTTTTGTAGCCTCCAGCAACTCCTCCCAGAGGCTGGCAACTTCACTCAGACGAGTGGTCACATTGTCAGAGGCATAGTGACCACCCTCAATCATCTC
1	158637750	158637870	SPTA1	121	TTGGCCAGTTTTCTGTATGTTTTCCAGCTGGGTCTTATTAACTGCCAACTCCTTTTCAAAGACTTGCTGCTTTTGAACCCTGCTCTTCAAGTTCTGTATGTCCTGAGATAAGATGAAAAA
1	158639155	158639275	SPTA1	121	AACTCCTGATAACTACATCCAGCTCCTGAAAACTCTGCCTACCTTGTAATCTTCATCATCTGCCAACTTTTTCTTCTTGTTGATCCAGTTCTTTAGGTCATCTGAGTCCTCATACAGTTT
1	158639275	158639395	SPTA1	121	TTGCAGAAGCAATGACTCCTTCAGCAATCTACGTCTAGTGGCAGCCTTTTCACGTAGGGCATCCCGCCGGGCTAACAGCTGCAAAAACCATGAGTAAACTTACTGTCAGCACAACCAAAT
1	158639477	158639597	SPTA1	121	GCTCTAGGCCCTTGGACATACCCCGTCACGGATAGCCTTGATGTTCTCTGAATCATAATGGTCATCACCAATCAATTTGGTTGCAGTCTTGTCTACAGTCTGAAAAAATAAAAATAAAAA
1	158641127	158641247	SPTA1	121	CTTACTATGATCTTCTCTTCCTGGGCAGTAAAGGCTTCCTCAAAGTCTTCATGCTTCTGAAGAAGGGCTTCTGCACTGCCCAGTGAGTTTCCCAGATCCTCGTTTTCCAGGAAGGCCTGT
1	158641797	158641917	SPTA1	121	TGAAGGGTGAGAGAAATTACTTCTAGAGATGGTATGGACCCCTCCCGTTACCTCTTGTCTACTCATCCAACTGTCCACTTGCTCACTGTCTCTGTAGAAGAGATGAAAGTCCAAGCACTG
1	158641917	158642037	SPTA1	121	CTCATACTGACGATGACGCTCGTCCCACAGTTCCAGCAGGGCAGTCCAGTTGTTGTCAAGTATTTCCATCTTTGGAAAGAAGGAGATAATGTATATGGAAGataattaatttattttatt
1	158644109	158644229	SPTA1	121	CTAGATTACCTTTTCCCGAACTTCATCAGAGGCTTCATGATTGGCATTCACGAGGTCTTGACCAGTCTCATCAGCAGATTGAAATCGGTCATCGTAAGAGTCAATCTCATGCTGTGGCCA
1	158644277	158644397	SPTA1	121	TTCAGCCAAATAACCTGCCCCCTCCTCCTACTGGGCAGCCTTTCTTCTCTACCTTATGCTGCTGATGCCTGTCCAGCAGAACTTCTCCACCAGCCACATCTGTTGGCAGCTCATCAGCAT
1	158644397	158644517	SPTA1	121	TGATCGCAGCAGTCTTCTCGTTCATCCAGCCTGAGAGTTCATCAAAGTCAGATGAAAATCGATGGTACCTGTGGGAAAAGTGAGGTAAAAGACAGGAAGGAGAAACCAGATATGAAAGGA
1	158645887	158646007	SPTA1	121	CCTGTAGAGATAGGTAGAGCAATAAAGGGGAGGGATTTCCCACCAATAAGTAGCCTGCAGTTTTTCATATCTGCTGGTGGCCAGGGCACGAATATGCTCCCAGCTGGAGACCAGATCTTC
1	158646007	158646127	SPTA1	121	TTTCATCTCCTGGATCTGAGGTGCATCTGAAGGATGGGAAAGTGTCAGCTTCTCTGCTTTAGCACATAACTCCTTCACCTTTGGGATGAAAAAGAAACCTAGTAGGAAATCCAAGTACTC
1	158647432	158647552	SPTA1	121	GCCTCTTCTAGCTCAACGGGTTAGCCATTTCTCTAACAGCGCATTACCTTGTCACTCATGACAGCAAGATTTCTCTCAAGTCCCTTGTGACTGTGAAACAGTCCTTCAGAGGCAACAAGG
1	158647552	158647672	SPTA1	121	TCTTTGCCATAGTCCTCAGAGGTGAGTACAGGTTCCTTCTCCTTGATCCACTGGATGGCTTCAGTCACATCCCTGCAGTCATTAACAAGAGCTCCAACCAAAGAAGATAGCAAGCATTAC
1	158648137	158648257	SPTA1	121	GGTTTTTATAAAGCACTTCAAAGTTTTCTATAAAGCAGTGGCCAGATCCATACCTTTTGAATCGTTGTAAGTTTGCAGCATTGGACAGAGCTTTCTGTCTCTGGAGAGCCAAACCACGAA
1	158648257	158648377	SPTA1	121	GGCGCTCCCAGGCAGCATTCACCTCATTTTGCTTAGACTGAATTAAGGGTAGGTCAGGATGGTTTTCCTGTTGAAGGAAAACAACACTGGAGTTATACAGAGATGAGATTATATTTAAAA
1	158650325	158650445	SPTA1	121	AGGATAAGAACCCTTTGCACGGAGTGAATATTTTGCTCCCACCTCACCTCGGCACACTCATTGGCATATTGGTTCACTTCAACAACTCTCCCTTCTTTAGCTACCAGCTCCACTTGGAAG
1	158650445	158650565	SPTA1	121	TCTTCAAATTTCTTATGCAGAACTTCGGTGCGCTCCCAGTCTTCACCTAGCTCCACTGATGTCGCTATAGCCTCCTGTAGACACAGAAGTTGATTGAGTTGCCAGCAAACATTTAGGAGT
1	158651267	158651387	SPTA1	121	GGACAGAGGAGTGGGAGGCCCTGTGTGATTGCTGTTTTAAGTTCGATACCTTGTCTCCAATCCACTCTAAGATGTCAGCACACTCCTGTACATACTGCTGGAACTTCAGGGCCCGCAGCA
1	158651387	158651507	SPTA1	121	ACTGGTCACCCTTCTCCAGGGTCAGCTCTAACAGCAGGTCCCACAGGTGGCGTAGCTCCTCTATATGGGCCTTTAGGAAAGAGGGGCAAAACCACTCAGCCACAGACACTGGGAGCAGGG
1	158653103	158653223	SPTA1	121	AAAACCCTGATAACATAATCAATAATTGGAAACTTCTTCAAGGGCCCATACATATACCTTCGTTTCTTCGTGGGCAGAATGACCCATGGTAAATCGTTCTTCCCTTGTTTTTTCCAGTTC
1	158653223	158653343	SPTA1	121	AGACATGAGTCTTGATTTTGTTTGCACCTCTGCTTCAAGGGATTGATGCTTCTGATATTTCCCCTAAAGTTTAGAAATCAGAGTTTTTGTCTAATGAAGCACAGTCTTCATGGGAAATGT
1	158654837	158654957	SPTA1	121	CTATTTCCTTCTCTAGAGATCTTAGGGTCTGCTCTGAGGCAATCAAGAGAACTGAGTGACCTGTATATTAGTTGGGTCTTCATAGCTCTTATCGGTTAAGATATTGACTTTCTCCATGAT
1	158654957	158655077	SPTA1	121	CCACTtccccagatcatctgcatctcgcttgaaaacttgtaagtgataggaatcctcaagcttctgaccccTCTCAGCGACCCGCTCCTTGAAACTTTGATACCGAGTCAACACTTCCTG
1	158655077	158655197	SPTA1	121	ACGCCTCTCCTGGATCTCTTCTGCTGTTTCCAAAACCTTTGGCCCACTGCTCTCCACAACCTGCAAGTTAAAAAGATTCTGTTACTTGCTAGTTCTCAAATATTTAACATGTTGCCCCGC
1	158656235	158656355	SPTA1	121	CCTAATAATATTAATGACAAATTGCATGGAAGAGAAATATGTACTTACGGTTTCCTTTGGAAATTGCTCCATTTTTCCTAAAGGTTTAGAACCTGGCAAGATAAAATGTGTCAGAGAGAG
1	162748331	162748444	DDR2	114	GTTATTCTGATTTCCCATTCTTTTCTTTACTTAAATAGGGCAAGTTCACTACAGCAAGTGATGTGTGGGCCTTTGGGGTTACTTTGTGGGAGACTTTCACCTTTTGTCAAGAA
1	162748444	162748451	DDR2	8	CAGCCCT
1	237205785	237205905	RYR2	121	gctcgggagccggccccggcgAGGAGGCGCGGAACCATGGCCGATGGGGGCGAGGGCGAAGACGAGATCCAGTTCCTGCGAACTGTAAGCGCCGTGCGTCGCGTGTGCTGTCAGGGGAAG
1	237433736	237433856	RYR2	121	TGGACTGTGCAGTCATGTCACGTCTCACTTATTTTTCCCTCTCTTTCTCCCCCTTTGCAGGATGATGAAGTGGTTCTGCAGTGCACCGCAACCATCCACAAAGAACAACAGAAGCTATGC
1	237433856	237433976	RYR2	121	TTGGCAGCAGAAGGATTTGGCAACAGACTTTGTTTCTTGGAGTCCACTTCCAATTCCAAGGTGGGATGAAGTCTTTCAAGGCTATTCAAATATGCAAGTTTTACTAGTGGCATTGAAGTT
1	237494169	237494289	RYR2	121	CTGTGCAGAATGTGCCCCCAGACCTCTCCATCTGCACCTTTGTGCTGGAGCAGTCCCTCTCTGTCCGGGCGCTGCAGGAGATGCTGGCTAACACCGTGGAGAAATCAGAAGGGGCAAGTA
1	237519214	237519334	RYR2	121	TGCTAGGTATTTGTTTGTTTGTTATTTATTTTGGCTTTTTCTTTCCACAGCAAGTTGATGTGGAAAAATGGGTATGTGTTTCCATGTATTTGCAAAGAAATTGTGATCTAAAAGTGCATG
1	237527588	237527707	RYR2	120	ATATTTTTAAGGAAGTCTTTGAGATCGTGTCTATTTAATGTTTCCTCTCTTTTCCTTATGCCCCTACAGAAATTCATGATGAAGGTAAGACATCTTAatatatatgctatgtatatata
1	237532811	237532931	RYR2	121	cttttttctcttctctCTAAAGACTGCTCAAGGTGGTGGTCATCGAACACTCCTCTACGGACATGCCATATTGCTGCGCCATTCCTATAGTGGCATGGTGAGTAGGCATTTGATTTCATC
1	237537996	237538116	RYR2	121	ACTGATTTTGTACTTTGTAGTATCTGTGCTGCCTGTCCACCTCCCGGTCTTCAACTGATAAGCTGGCTTTTGATGTTGGCTTGCAAGAGGACACCACAGGTAAGCATCTTGTGCTGCGGG
1	237540618	237540738	RYR2	121	GCAGGGGAGGCTTGTTGGTGGACCATACACCCTGCCTCTAAGCAGCGATCAGAAGGAGAAAAAGTACGAGTTGGAGATGACCTCATCTTAGTTAGCGTGTCCTCTGAAAGGTACTTGGTA
1	237550570	237550690	RYR2	121	CTTGATACAGCACTTGTCTTATGGCAACGGCAGCTTACACGTGGATGCCGCTTTCCAGCAGACTCTCTGGAGCGTGGCCCCAATCAGCTCAGGAAGTGAGGCAGCCCAAGGTAAAAACTC
1	237551375	237551495	RYR2	121	TATCCTTACAGGGTATCTCATTGGTGGTGATGTCCTCAGGTTGCTGCATGGACACATGGACGAGTGTCTCACTGTCCCTTCAGGAGAACATGGTGAAGAGCAGCGGAGGTTAGTACCTGA
1	237580326	237580446	RYR2	121	TTTTGTTTGTTTGTTGAAACAGAACTGTTCATTATGAAGGTGGCGCTGTGTCTGTTCATGCACGTTCCCTTTGGAGACTAGAGACGCTAAGAGTTGCGTAAGTAGAACTTCTAAACACAG
1	237586349	237586469	RYR2	121	ATTGTGGGTGCTATTGGATCAAGTCCTAACTGTTTTCATTAGGTGGAGTGGAAGCCACATAAGATGGGGACAGCCATTCCGACTACGCCATGTCACAACAGGAAAATACTTGAGTCTCAT
1	237586469	237586589	RYR2	121	GGAAGACAAAAACCTTCTACTCATGGACAAAGAGAAAGCTGATGTAAAATCAACAGCATTTACCTTCCGGTCTTCCAAGGTGAGACAGAAAATATTTTGGGTTTCCTATAAATGTTACCC
1	237604580	237604700	RYR2	121	AAATGTTTACTGACCTTTTTTTCCTCCTCTCCCCTTAGGAAAAATTGGATGTAGGGGTGAGAAAAGAAGTAGATGGCATGGGAACATCTGAAATAAAATACGGTGACTCAGTATGCTATA
1	237604700	237604820	RYR2	121	TACAACATGTAGACACAGGCCTATGGCTTACTTACCAGTCTGTGGACGTGAAATCCGTGAGAATGGGATCTATACAACGTAAGGTAAGGTGATAGAAAAAAACATAATTTATAGAAGTAA
1	237608641	237608761	RYR2	121	TAACTCTAGTTTGGAAAAGAGACGTTGGGAGTAATGGCCTTATTTTTGCTTTCTTACAGGCTATTATGCATCATGAAGGCCACATGGATGATGGCATAAGTTTGTCGAGATCCCAGCATG
1	237608761	237608881	RYR2	121	AAGAATCACGCACAGCCCGAGTTATCCGGAGCACAGTCTTCCTTTTCAATAGATTTATAAGGTACTTTTTCTTTTGTAGGCGTAGTTGTTTGATACTTCATTTTCATTTCTTTATTGGAT
1	237617662	237617782	RYR2	121	ATAGAGAAATGTTTATGGTTTATTTTAGGGGCCTTGATGCTCTCAGCAAGAAAGCGAAGGCTTCCACAGTCGATTTGCCTATAGAGTCCGTAAGCCTAAGTCTGCAGGATCTCATTGGCT
1	237617782	237617902	RYR2	121	ACTTCCACCCCCCAGATGAGCATTTAGAGCATGAAGACAAACAGAACAGACTACGAGCCCTGAAGAATCGGCAAAATCTCTTCCAGGAAGAGGTCCGTTTCTATCAACACTCATTTCTCT
1	237619847	237619967	RYR2	121	AATGACAGTTTTGGATGTCTGATTGTGATTTTTTTTTTTTTTAACGTTCCAGGGAATGATCAACCTCGTGCTTGAGTGCATAGACCGTTTGCACGTCTACAGCAGTGCAGCACACTTTGC
1	237619967	237620087	RYR2	121	TGATGTTGCTGGGCGAGAAGCAGGAGAGTCTTGGAAATCCATTCTGAATTCTCTGTATGAGTTGCTGGGTAAGAAGCATGATTGGGTTCATAGCAACAGAGTTATCTATTTAAAATGTCC
1	237632379	237632499	RYR2	121	CTTCTTTTGCAGCGGCTCTAATTAGAGGAAATCGTAAAAACTGTGCTCAATTTTCTGGCTCCCTCGACTGGTTGATCAGCAGATTGGAAAGACTGGAAGCTTCTTCAGGTATGTTTTCTA
1	237655105	237655225	RYR2	121	GCATTCTGGAAGTTTTACACTGTGTTTTAGTAGAAAGTCCAGAAGCTCTAAATATTATTAAAGAAGGACATATTAAATCTATTATCTCACTTTTAGACAAACATGGAAGAAATCACAAGG
1	237656200	237656320	RYR2	121	gagggaaagcagggagggagggaggaTCAGCTGAAAGTAATTTCTCTTTTCAGGTTCTGGATGTCTTGTGCTCACTCTGTGTTTGCCACGGGGTTGCAGTCCGTTCTAACCAGCATCTCA
1	237656320	237656440	RYR2	121	TCTGTGACAATCTCCTACCAGGAAGAGACTTGTTATTGCAGACACGTCTTGTGAACCATGTCAGCAGGTAAATTCAGACAGACAATGTCACCTGACAGGTACCATAATAAAAGAATTAAT
1	237659751	237659871	RYR2	121	TGAAAACAATGAAAGGTTTTTTTGGACTTTCCTTACATGTGATTCCCGTCTCTTTAAAGCATGAGACCCAATATTTTTCTGGGCGTCAGTGAAGGTTCTGCTCAGTATAAGAAATGGTAC
1	237659871	237659991	RYR2	121	TATGAATTGATGGTGGACCACACAGAGCCCTTTGTGACAGCTGAAGCAACTCACCTGCGAGTGGGCTGGGCTTCCACTGAAGGATATTCTCCCTACCCTGGAGGGGGCGAAGAGTGGGGT
1	237659991	237660111	RYR2	121	GGAAATGGTGTTGGAGATGATCTCTTCTCCTATGGATTTGATGGCCTTCATCTCTGGTCAGGTACGTACTATCCATTTTCTTTCACCGTGTTCCAGAAGATCTTTTGCTGGGCATTTCTG
1	237663986	237664106	RYR2	121	TCCTTAATGTTTTCCCCCCAATAGGTTGTATTGCTCGTACTGTAAGCTCACCAAACCAACATCTGTTAAGAACTGATGATGTCATCAGTTGCTGTTTAGATCTGAGTGCCCCAAGCATCT
1	237664106	237664226	RYR2	121	CGTTCCGAATTAATGGACAACCTGTTCAAGGAATGTTTGAGAATTTCAACATCGATGGCCTCTTCTTTCCAGTCGTTAGTTTCTCTGCAGGAATAAAGTTAGTATGTCTATGTTTTTTGG
1	237666576	237666696	RYR2	121	CATCCTCTTTAGAGTACGCTTTCTGCTTGGAGGGCGACATGGAGAATTCAAATTTCTTCCTCCACCTGGGTATGCTCCTTGTTATGAAGCTGTTCTGCCAAAAGAAAAGTTGAAAGTGGA
1	237666696	237666816	RYR2	121	ACACAGCCGAGAGTACAAGCAAGAAAGAACTTACACACGCGACCTGCTGGGCCCCACAGTTTCCCTGACGCAAGCTGCCTTCACACCCATCCCTGTGGATACCAGCCAGGTACCAAGATC
1	237670001	237670121	RYR2	121	AATTTTAGATCGTGTTGCCTCCTCATCTAGAAAGAATAAGAGAAAAACTGGCAGAGAATATCCATGAACTCTGGGTTATGAATAAAATTGAGCTTGGCTGGCAGTATGGTCCGGTATGTA
1	237674979	237675099	RYR2	121	TGTTTCAGGTTAGAGATGACAACAAGAGACAACACCCATGCCTGGTGGAGTTCTCCAAGCTGCCTGAACAGGAGCGCAATTACAACTTACAAATGTCGCTTGAGACCCTGAAGTGAGTTT
1	237693708	237693828	RYR2	121	TCTGGTTTTGTTTTCCAGGACTTTGTTGGCATTAGGATGTCATGTGGGTATATCAGATGAACATGCTGAAGACAAGGTGAAAAAAATGAAGCTACCCAAGAAGTAAGTTGAATGACTAAG
1	237711690	237711810	RYR2	121	AGGCCAATTATACACAAATTTCTTTGTCTCTGATTTGTAGTTACCAGCTGACAAGTGGATACAAGCCTGCCCCTATGGACCTGAGCTTTATCAAACTCACCCCATCACAAGAAGCAATGG
1	237711810	237711930	RYR2	121	TGGACAAGTTGGCAGAAAATGCACATAATGTGTGGGCGCGGGATCGAATCCGGCAGGGCTGGACTTATGGCATCCAACAGGTACATGGGAATTAGCATTTGGTCTGAGACTTACTTAAGT
1	237713797	237713917	RYR2	121	AGCCCTTGGTATTGCTTTGACGGCTGCACCCTGTGTTTTCCTGCAGGACGTAAAGAACAGAAGAAATCCTCGCCTTGTTCCCTACACTCTTCTGGATGACCGAACCAAGAAATCCAACAA
1	237713917	237714037	RYR2	121	GGACAGCCTCCGCGAGGCTGTGCGCACGCTGCTGGGGTACGGCTACAACTTGGAAGCACCAGATCAAGATCATGGTATTTTGGTTTTACTTTCCTCTTCTTCGGTTGCAAGATGATGTAG
1	237729850	237729970	RYR2	121	TCTGTCCATTTCCCAGCAGCCAGAGCCGAAGTGTGCAGCGGCACCGGGGAAAGGTTCCGAATCTTCCGTGCCGAGAAGACCTATGCAGTGAAGGCCGGACGGTGGTATTTTGAATTTGAG
1	237729970	237730090	RYR2	121	ACGGTCACTGCTGGAGACATGAGGGTTGGTTGGAGTCGTCCTGGTTGTCAACCGGATCAGGAGCTTGGCTCAGATGAACGTGCCTTTGCCTTTGATGGCTTCAAGGTGAGTGGACTTTGT
1	237732412	237732532	RYR2	121	TGTGACAAGGGACTTTTCTGTCCTCTGTATAGGCCCAGCGGTGGCATCAGGGCAATGAACACTATGGGCGCTCTTGGCAAGCAGGCGATGTCGTGGGGTGTATGGTTGACATGAACGAAC
1	237732532	237732652	RYR2	121	ACACCATGATGTTCACACTGAATGGTGAAATCCTTCTTGATGATTCAGGCTCAGAACTGGCTTTCAAGGACTTTGATGTTGGCGATGGTAAGTCTACTATGTTTTGTGTTTTTTTTAAGT
1	237753076	237753196	RYR2	121	TTTTTTTTCTTCCCAGGATTCATACCTGTGTGTAGCCTTGGAGTGGCTCAAGTGGGTAGGATGAACTTTGGAAAGGATGTCAGCACCTTGAAATATTTCACCATCTGTGGCTTACAAGAG
1	237753196	237753316	RYR2	121	GGCTATGAACCATTTGCCGTTAATACAAACAGGGATATTACCATGTGGCTGAGCAAGAGGCTTCCTCAGTTTCTTCAAGTTCCATCAAACCATGAACATATAGAGGTTTGCTTTTTCTTT
1	237753935	237754055	RYR2	121	CTAGGTGACCAGAATAGACGGCACCATAGACAGTTCCCCATGTTTAAAGGTCACTCAGAAGTCTTTTGGTTCTCAGAACAGCAACACTGATATCATGTTTTATCGCCTGAGCATGCCGAT
1	237754055	237754175	RYR2	121	CGAGTGCGCGGAGGTCTTCTCCAAGACGGTGGCTGGAGGGCTCCCTGGGGCTGGCCTTTTTGGGCCCAAGAATGACTTGGAAGATTATGATGCTGATTCTGACTTTGAGGTTCTGATGAA
1	237754175	237754295	RYR2	121	GACAGCTCATGGCCATCTAGTGCCCGATCGTGTTGACAAAGACAAAGAAGCTACTAAACCAGAGTTTAACAACCACAAAGATTATGCCCAGGAAAAGCCCTCTCGTCTGAAACAAAGGTT
1	237755036	237755156	RYR2	121	AGATTTTTGCTTAGAAGAACAAAGCCAGATTACAGCACAAGCCATTCTGCAAGACTCACCGAAGATGTCCTTGCTGATGATCGGGATGACTATGATTTCTTGATGCAAACGTCCACGGTA
1	237756735	237756855	RYR2	121	AGTTTTACTTTGCCAATATTTGGTTCTGCTATCTTCACAGTACTATTACTCAGTGAGAATCTTTCCTGGACAAGAACCTGCTAATGTCTGGGTGGGCTGGATTACATCAGATTTCCATCA
1	237756855	237756975	RYR2	121	GTATGACACAGGCTTTGACTTGGACAGAGTTCGCACAGTAACAGTTACTCTAGGAGATGAAAAAGGAAAAGTGCATGAAAGGTTAGTTTTCCTCAATTTTTTGCAAGAATGACATGTGAA
1	237758757	237758877	RYR2	121	TGTGGTTGTACAAAGATAAAAATGTTCTTTTGAAATTCAGCATCAAACGCAGCAACTGCTATATGGTATGTGCGGGTGAGAGCATGAGCCCCGGGCAAGGACGCAACAATAATGGACTGG
1	237758877	237758997	RYR2	121	AGATTGGCTGTGTGGTGGATGCTGCCAGCGGGCTGCTCACATTCATTGCCAATGGCAAGGAACTGAGCACATACTATCAGGTACGCGGTCAGTGATGATATCAGTCTTCTAGGGAGGAAG
1	237765308	237765428	RYR2	121	ATTAAATGTATTTCAGGTGGAACCGAGTACAAAATTATTTCCTGCGGTTTTTGCACAAGCTACAAGTCCCAATGTTTTCCAGTTTGAGTTGGGAAGAATAAAGGTAATAAAACTTATTCC
1	237774055	237774175	RYR2	121	CGCTAGAATGTGATGCCTCTCTCGGCGGGATTATTCAAGAGTGAGCACAAGAACCCCGTGCCGCAGTGCCCCCCGCGCCTCCACGTGCAGTTCCTGTCACACGTCCTGTGGAGCAGAATG
1	237774175	237774295	RYR2	121	CCCAACCAGTTTTTGAAGGTAGATGTGTCTCGAATAAGTGAACGCCAAGGCTGGTTGGTGCAGTGTTTGGATCCTCTGCAGTTCATGTCTCTTCATATCCCTGAGGAAAACAGGTCAGCC
1	237777320	237777440	RYR2	121	CTCTCCTCCCTTCTACAGATCTGTTGACATCTTAGAGTTGACAGAGCAGGAGGAATTGCTGAAATTTCACTATCACACTCTCCGGCTCTACTCAGCCGTCTGTGCTCTTGGGAACCACCG
1	237777440	237777560	RYR2	121	GGTGGCCCATGCCCTGTGCAGCCATGTGGATGAACCTCAGCTCCTCTATGCCATTGAGAACAAGTACATGCCTGGTTTGCTGCGTGCTGGCTACTATGACCTGCTGATTGACATCCACCT
1	237777560	237777680	RYR2	121	GAGCTCCTATGCCACTGCCAGGCTCATGATGAACAACGAGTACATTGTCCCCATGACGGAGGAGACGAAGAGCATCACCCTGTTCCCTGATGAGAACAAAAAACACGGCCTTCCAGGGAT
1	237777680	237777800	RYR2	121	CGGCCTCAGCACCTCCCTCAGGCCACGGATGCAGTTTTCCTCCCCCAGTTTTGTAAGCATTAGTAATGAATGTTACCAGTACAGTCCAGAGTTCCCACTGGACATCCTCAAGTCCAAAAC
1	237777800	237777920	RYR2	121	CATACAGATGCTGACAGAAGCTGTTAAAGAGGGCAGTCTTCATGCCCGGGACCCAGTTGGAGGGACTACTGAATTCCTCTTTGTACCTCTCATCAAGCTTTTCTATACCCTGCTGATCAT
1	237777920	237778040	RYR2	121	GGGCATCTTTCACAACGAGGACTTGAAGCACATCTTGCAGTTGATTGAGCCCAGTGTGTTTAAAGAAGCTGCCACTCCGGAGGAGGAGAGTGACACGCTGGAGAAAGAGCTCAGTGTGGA
1	237778040	237778160	RYR2	121	CGATGCAAAGCTGCAAGGAGCTGGTGAGGAAGAAGCCAAGGGGGGCAAGCGGCCCAAGGAAGGCCTGCTCCAAATGAAACTGCCAGAGCCAGTTAAATTGCAGGTAATCAGAACAAGAGA
1	237780565	237780685	RYR2	121	TCTTTTTAATGGTCTCTTAGATGTGCCTACTGCTTCAGTACCTCTGTGACTGCCAGGTCCGGCACCGGATAGAAGCCATTGTAGCCTTTTCAGATGATTTTGTGGCTAAGCTCCAAGACA
1	237780685	237780805	RYR2	121	ATCAACGTTTCCGATACAACGAAGTCATGCAAGCCTTAAACATGTCAGCTGCACTCACAGCCAGGAAGACAAAGGAATTTAGATCACCACCTCAAGAACAGGTACAGAAATGAAATGAAA
1	237787057	237787177	RYR2	121	CTTTCAGATCAATATGCTTCTCAATTTTAAGGATGACAAAAGTGAATGTCCATGTCCAGAAGAAATTCGTGACCAACTATTGGATTTCCATGAAGATTTGATGACACATTGTGGTAAGGT
1	237788912	237789032	RYR2	121	GTGTATTCTTTAAATATTTTTTTCTGCCTCTCTGTTTTTTTATACTAGGAATTGAGCTGGATGAAGATGGGTCTCTGGATGGAAACAGTGATTTAACAATTAGAGGGCGTCTGCTATCCC
1	237789032	237789152	RYR2	121	TGGTAGAAAAGGTGACATATCTGAAGAAGAAGCAAGCAGAAAAACCAGTTGAGAGTGACTCCAAAAAGTCCTGTAAGCAGTATGAGAGTGCACTGGCAGAATGACCCAACTGCTGACACT
1	237791063	237791183	RYR2	121	TCTCTTATTTTTCTTTTAAAAAATATCCATAATGACTTTGCAGCCACTCTGCAGCAGCTGATTTCTGAGACCATGGTCCGATGGGCTCAGGAGTCTGTCATTGAAGACCCCGAGCTGGTG
1	237791183	237791303	RYR2	121	AGGGCCATGTTTGTGTTGCTCCATCGGCAGTATGACGGCATTGGGGGTCTTGTTCGGGCCCTGCCAAAGACCTACACGATAAATGGTGTGTCCGTGGAGGACACCATCAACCTGCTGGCA
1	237791303	237791423	RYR2	121	TCCCTTGGTCAGATTCGGTCCCTGCTGAGTGTGAGAATGGGCAAAGAAGAAGAGAAGCTCATGATTCGTGGATTAGGGTAAATTATTTAACTACTACAACCCTTTGTCTCGTAAATGTTT
1	237794724	237794844	RYR2	121	AGGGATATTATGAATAACAAAGTGTTTTACCAGCACCCTAATCTCATGAGGGCACTGGGGATGCACGAGACTGTGATGGAGGTCATGGTGAACGTCCTTGGAGGTGGAGAGTCCAAGGTA
1	237796823	237796943	RYR2	121	CAATTTTATAAAGGTCGTTTGCTTTCAGCAGCTAATGACATGCTTTATCTGTAGGAAATCACCTTTCCCAAGATGGTGGCCAACTGTTGCCGTTTTCTCTGTTACTTCTGTCGTATAAGT
1	237796943	237797063	RYR2	121	AGGCAGAATCAAAAAGCTATGTTTGATCATCTCAGTTATTTACTGGAAAACAGCAGTGTTGGTCTTGGTAAGTAAATGACTTTTATTTCATCTTTAAGGTTGAAATAATATAATATTACA
1	237798180	237798300	RYR2	121	ATTAATAGCCTCCCCAGCTATGAGAGGTTCAACACCACTGGATGTGGCTGCAGCTTCGGTGATGGATAATAATGAACTAGCATTAGCTCTGCGTGAGCCGGATCTAGAAAAGGTGAGCAA
1	237801604	237801724	RYR2	121	CTAATGAGTTTTCAGCCAAGGGATAACTCTTTGTTAATCATGTTGTTTGCAGGTAGTTCGTTATTTGGCTGGTTGTGGACTGCAAAGTTGCCAGATGCTGGTGTCTAAGGGCTATCCAGA
1	237801724	237801844	RYR2	121	CATTGGGTGGAACCCAGTTGAAGGAGAGAGATATCTTGACTTTCTTAGATTTGCTGTCTTCTGTAATGGTAGGACTTGATTTCTTGAGGTCTTTTGAGTTATCATTAAAACTGCATAGAG
1	237802288	237802408	RYR2	121	TACTTATCTTCCCCATTCTACTTTAGGGGAGAGTGTGGAGGAAAATGCAAATGTCGTGGTGAGATTGCTCATTCGGAGGCCTGAGTGTTTTGGTCCTGCTTTGAGAGGAGAAGGTGGGAA
1	237802408	237802528	RYR2	121	TGGGCTTCTTGCAGCAATGGAAGAAGCCATCAAAATCGCCGAGGATCCTTCCCGAGATGGTCCCTCACCAAATAGCGGATCCAGTAAAACACTGTAGGTCTAATATACACACCCTCACGA
1	237804189	237804309	RYR2	121	ATGAAAGTGACACAGAGGAGGAGGAAGATGACACTATCCACATGGGGAACGCGATCATGACCTTCTATTCAGCTTTGATTGACCTCTTGGGACGCTGTGCTCCTGAGATGCATGTGAGTT
1	237806566	237806686	RYR2	121	GACAGAATTGTAACATTGATGTCACAAAGTTGTTCTAATGTTTTTTTTTCCCCTGTATAGTTGATTCATGCCGGGAAGGGAGAAGCCATCAGAATTAGGTCCATTTTGAGATCCCTCATT
1	237806686	237806806	RYR2	121	CCCCTGGGAGATTTGGTGGGCGTTATCAGCATCGCTTTTCAGATGCCAACAATAGCCAAAGGTAAGGCCAACTTCAATTTGTCCTAATTCAGTAGGATGTTGGATGACATCATGTTCTAA
1	237811708	237811828	RYR2	121	AGCCATTGACACCAAAATTCACTTCTCTCTTTTAGATGGGAATGTGGTGGAACCTGACATGTCTGCGGGGTTTTGCCCAGATCACAAGGCAGCCATGGTTTTATTCCTTGACAGGGTCTA
1	237811828	237811948	RYR2	121	TGGGATTGAGGTTCAAGACTTCCTCCTCCATCTTCTTGAGGTTGGCTTTCTGCCAGATCTCCGGGCGGCTGCTTCTTTAGATACGGTGAGATTGGAGCGATGGACTTCCTCCTCTCTTGA
1	237813166	237813286	RYR2	121	TCTTTTTCAGGCAGCTTTGAGTGCTACAGACATGGCCTTGGCCCTCAATCGGTACCTTTGCACAGCCGTCTTGCCATTGTTAACAAGATGTGCTCCTCTCTTTGCTGGCACAGAGCACCA
1	237813286	237813406	RYR2	121	CGCTTCTCTCATTGACTCATTACTTCATACTGTGTATAGACTTTCTAAGGGCTGTTCACTTACCAAAGCTCAGCGGGATTCCATAGAAGTTTGTTTACTCTCTATTTGTGGGTGAGTGGA
1	237814696	237814816	RYR2	121	CTTTGTTCCAACAGACAACTGAGACCTTCTATGATGCAGCACTTACTCAGAAGATTAGTATTTGATGTTCCATTATTAAATGAACACGCAAAGATGCCTCTTAAAGTAAGTATAGGAAAT
1	237817523	237817643	RYR2	121	TATAAAAGGTTTTGATAGCTCATTGCTTTTATAATTGTTTTCCCACATAGCTGCTGACAAATCATTATGAAAGATGCTGGAAATATTACTGCCTGCCTGGAGGGTGGGGAAACTTTGGTG
1	237817643	237817763	RYR2	121	CTGCCTCAGAAGAAGAACTTCATTTATCAAGAAAGTTGTTCTGGGGCATTTTTGATGCCCTGTCTCAAAAGGTAATTTAATGGTTTGTGGGTTTGTTTGTATCAATAAAATGGTATAGAG
1	237819082	237819202	RYR2	121	TATAGTAATTTTTTTTTTTGGTCCTCCATTTTTCCCAGAAATATGAACAAGAACTTTTCAAACTGGCACTGCCTTGCCTGAGTGCAGTTGCGGGAGCTTTGCCTCCAGACTACATGGAGT
1	237819202	237819322	RYR2	121	CAAATTATGTCAGTATGATGGAAAAACAGTCATCAATGGATTCTGAAGGGAACTTTAACCCACAACCTGTTGATACCTCAAAGTATGGACTCTTTCTATTGCAGCAGATTTTTATTGTAA
1	237821223	237821343	RYR2	121	TGTCTTTACTTTTCTCATAGTATTACAATTCCTGAGAAATTGGAATACTTCATTAACAAATATGCAGAACACTCCCATGACAAATGGTCAATGGACAAGGTAAAAAGAGTATTACATTCT
1	237823269	237823389	RYR2	121	TTGCCTTTTTTTAAGTTGGCAAATGGATGGATTTATGGAGAAATATATTCAGACTCTTCTAAGGTTCAGCCATTAATGAAGCCATATAAGCTATTGTCTGAAAAGGTAAGGATTTTTTGT
1	237824058	237824178	RYR2	121	TTTTATTTACATTCATAATATATCTGTTGTTTCTTGTTTTTTCTTCTCTAGGAAAAAGAAATTTATCGCTGGCCAATCAAAGAATCTTTAAAAACTATGCTGGCTTGGGGCTGGAGAATT
1	237824178	237824298	RYR2	121	GAAAGAACTCGGGAGGGAGACAGCATGGCCCTTTACAACCGGACTCGTCGTATTTCTCAGACAAGCCAGGTAAGAATTCATCACGGTGATGAATCAACTGTTTATGTTATGGattaaata
1	237829790	237829910	RYR2	121	TTTTTCACACAAATGATCTAGGTTTCTGTGGACGCTGCCCATGGTTACAGTCCCCGGGCCATTGACATGAGCAATGTTACACTATCTAGAGACCTGCATGTAAGTACTATTAACTTTTAA
1	237831160	237831280	RYR2	121	TAAATATTTTTGTTCATTTAAGGCTATGGCAGAAATGATGGCTGAAAACTACCATAATATATGGGCAAAGAAAAAGAAAATGGAGTTGGAGTCCAAAGGTAATATTTTCTAAAAACGTTT
1	237837337	237837457	RYR2	121	CTCATCTCAGATTCTTTTCAAATTACTATGCTGTGTTCTTGTCCTGACATACTCTTAGGAGGAGGAAACCATCCTCTGCTGGTGCCCTATGATACACTGACAGCCAAAGAGAAAGCCAAG
1	237837457	237837577	RYR2	121	GATAGAGAAAAAGCACAGGACATCCTCAAGTTCTTGCAGATCAATGGATATGCTGTATCCAGGTAAAAGTACACATACCCTAAGTACACACTCTTTTCACAAGAGTGAATATTTAAATAT
1	237838028	237838148	RYR2	121	AGAGGATTTAAGGACCTGGAACTGGACACGCCTTCTATTGAGAAACGATTTGCCTATAGTTTCCTCCAACAACTCATTCGCTATGTGGATGAAGCCCATCAGTATATCCTGGAGTTTGGT
1	237841319	237841439	RYR2	121	TTTACCTAAAAACTCTTCAAATCTACAGATGGTGGCAGCAGAGGCAAAGGAGAACATTTCCCTTATGAACAAGAAATCAAGTTCTTTGCAAAAGTACAGTATACAATCTATCTTGTTTTT
1	237843696	237843816	RYR2	121	CCCATTCATCCCCTGAAAGATTCCACTACGTAGATCTGTCTTCTTTTCCTTTCTTTCAGGTCGTTCTTCCTTTAATTGATCAGTATTTCAAAAACCATCGTTTATACTTCTTATCTGCAG
1	237843816	237843936	RYR2	121	CAAGCAGACCTCTCTGCTCTGGAGGACATGCTTCCAACAAAGAGAAAGAAATGGTGACTAGGTAAACAGCTATAAAAATAAGCACTGTTGTATGACTTAGGTGTATATGCAGTTGCAAAG
1	237850731	237850851	RYR2	121	TTTTGTTTTTCTTTTGTCTTCAGCCTATTCTGCAAACTTGGAGTTCTTGTCAGGCATAGGATTTCACTATTTGGTAAGGAGACCCTTGAAAAAATACAAGCATGGCCATCACTTGGTTTT
1	237862234	237862354	RYR2	121	AATTTATACAGCATTTTGTTTCCTCTTTAGGCAATGATGCAACATCAATTGTCAACTGTCTTCATATTTTGGGTCAGACTTTGGATGCAAGGTAAATGGATACATTTTTACCTAAATAAA
1	237863528	237863648	RYR2	121	GACAGTGATGAAGACTGGCCTGGAGAGTGTTAAAAGTGCACTCAGAGCTTTTCTGGACAACGCTGCAGAGGATCTGGAGAAGACCATGGAAAACCTCAAGCAGGGCCAGTTCACTCACAC
1	237863648	237863768	RYR2	121	CCGAAACCAGCCCAAAGGGGTTACTCAGATTATCAATTACACCACAGTGGCCCTGCTGCCAATGCTGTCTTCATTATTTGAACATATTGGCCAGCATCAGTTCGGAGAAGACCTAATATG
1	237865258	237865378	RYR2	121	AGATTCTCTTTTTCCTTAGTGGAAGATGTCCAGGTGTCTTGTTATAGAATTCTGACTAGCTTATATGCTTTGGGAACCAGCAAGAGTATTTACGTGGAGAGGTAAGAATGTTTAAAGTTT
1	237868458	237868578	RYR2	121	TTTTTTAGTTACTCACTTGGAAGACCTTAAAACATAAGCATTTTCCACTTATAGGCAACGTTCTGCATTAGGAGAATGTCTAGCTGCCTTTGCTGGTGCTTTTCCTGTAGCATTTTTGGA
1	237868578	237868698	RYR2	121	AACTCATCTGGACAAACATAATATTTACTCCATCTACAATACCAAGTCTTCACGAGAAAGAGCAGGTAACACAGAAACATGTGCAGTGCTTTGAGATATGAAGCTAAAACTTGATATTTA
1	237870228	237870348	RYR2	121	TTTTATATGTACTTCTCCAGCTCTCAGTTTGCCAACTAATGTGGAAGATGTTTGTCCAAACATACCGTCTTTGGAGAAACTCATGGAAGAAATCGTGGAATTAGCCGAGTCCGGCATTCG
1	237870348	237870468	RYR2	121	CTACACTCAAATGCCACATGTCATGGAAGTCATACTGCCCATGCTTTGCAGCTACATGTCTCGTTGGTGGGAGCATGGACCTGAGAACAATCCAGAACGGGCCGAGATGTGCTGCACAGC
1	237870468	237870588	RYR2	121	CCTGAACTCAGAGCACATGAACACACTTCTAGGGAACATATTGAAAATCATATATAATAACTTGGGGATTGATGAGGGAGCCTGGATGAAGAGGCTAGCAGGTAAGAACTGGAAGAAGAC
1	237872097	237872217	RYR2	121	CTATCATCATGTTAATGAATGGTTTTACAGAGCAGAATACTAATGTCTGTCTTTAAACAGTGTTTTCCCAGCCTATAATAAATAAAGTGAAACCTCAGCTCTTGAAAACTCATTTCTTGC
1	237872217	237872337	RYR2	121	CGTTAATGGAGAAACTCAAGAAAAAGGCAGCTACGGTGGTGTCTGAGGAAGACCACCTGAAAGCTGAGGCCAGGGGGGACATGTCGGAGGCAGAACTCCTCATCCTAGATGAGTTCACCA
1	237872337	237872457	RYR2	121	CACTGGCCAGAGATCTCTATGCCTTCTACCCTCTCTTGATTAGATTTGTGGACTATAACAGGTATGATCAAAAGTAATTTAGTAATTTCTCCAATTCGGTCATAACGTTTCTTGGCTCAC
1	237872763	237872883	RYR2	121	TTATTATGTGATCCAGGGCAAAGTGGCTAAAGGAGCCTAACCCAGAAGCAGAGGAGCTCTTCCGCATGGTGGCTGAAGTGTTTATCTACTGGTCGAAGTCCCATGTGAGTGTGAAAATAT
1	237875030	237875150	RYR2	121	TTGCAACTTCTCAGAATTTCAAAAGAGAAGAGCAGAACTTCGTTGTACAGAATGAAATCAACAATATGTCTTTCCTTATTACTGATACCAAGTCAAAGATGTCAAAGGTATTACTATAAA
1	237880463	237880583	RYR2	121	GGTTCAGATCCCAGCACTTCTCTTTGTTCCATAGGCAGCTGTTTCTGATCAGGAAAGGAAGAAAATGAAGCGCAAAGGAGATCGGTATTCCATGCAGACCTCTCTGATTGTAGCAGCTCT
1	237880583	237880703	RYR2	121	GAAGCGGTTACTGCCCATTGGGTTGAACATCTGTGCCCCTGGGGACCAGGAGCTCATTGCTCTGGCCAAAAATCGATTTAGCCTGGTAAGTCTCCTTTTCATCCCAGCGGTAATGATCAT
1	237881731	237881851	RYR2	121	TCCTTTTAGGTAACATATATTTCTTGACAGAAAGATACCGAGGATGAAGTACGAGATATAATCCGCAGCAATATTCATTTACAAGGCAAGGTAAGCCAAATTTTATTCTTAAGCCACATT
1	237886375	237886495	RYR2	121	CTTGTTTTTAGATTCCCATCTTCCCATTGTAACCTTTTCCTTTTTTCTGCAGTTGGAGGATCCTGCTATTAGATGGCAAATGGCTCTTTACAAAGACTTACCAAACAGGACTGATGATAC
1	237886495	237886615	RYR2	121	CTCAGATCCAGAGAAGACGGTAGAAAGAGTATTGGATATAGCAAATGTGCTTTTTCATCTTGAACAGGTCAGGCTTTGTGTCAATTCAATCATATTTGCCTTAGCCACATACAAATATTT
1	237889530	237889650	RYR2	121	GTTTTACTTTTTTAGCTAACATAACATTTTTATTTCTTTCAGAAGTCTAAACGTGTGGGTCGGAGACATTACTGTCTGGGAAGTACAGTGCTCAATGGCCTAGAGATTACTAATTAATTT
1	237890382	237890502	RYR2	121	TCAGGTGGAACATCCTCAGAGATCTAAAAAGGCTGTATGGCATAAACTACTGTCCAAGCAGAGGAAAAGGGCTGTTGTAGCCTGCTTCCGGATGGCCCCCTTATATAATCTGCCAAGGTC
1	237893547	237893667	RYR2	121	CTTACCTTTCAGGCATCGGGCTGTCAATCTCTTTCTTCAGGGATATGAAAAGTCTTGGATTGAAACAGAAGAACATTACTTTGAAGATAAACTGATAGAAGATTTAGCAGTATGTTTTTA
1	237895337	237895457	RYR2	121	TTTTGCAGAAACCTGGGGCTGAACCTCCAGAAGAAGATGAAGGCACTAAGAGAGTTGATCCTCTACATCAGCTGATCCTTCTGTTTAGTCGGACAGCTTTAACAGAGAAATGGTATGGTT
1	237896970	237897090	RYR2	121	TTAAACACTGATGTTTTCTTCTTGCTTTCCCCAGCAAACTGGAGGAAGATTTTTTATATATGGCCTATGCAGATATTATGGCAAAGGTAAATAAGTATCCTTCCTGATTTTCATGTTTAA
1	237905562	237905682	RYR2	121	CTGTCTCCtttttttttttttttaaatataCAGAGTTGTCATGATGAGGAAGATGACGATGGTGAAGAGGAAGTGAAGAGTTTTGAAGTAAGATGGATCTTTCTGGATTTGCCTTTCTTT
1	237918328	237918448	RYR2	121	AAAAAAAACCCTGATCAATTTTGTTTTCGCAGCACGATATTATCAAAGATTTAAGAAACAAATTTGCCAGCCTCGGCGAGAACTCTCTGGTAACAGCATAAATGTCTGTGTTGGTTGCTT
1	237919577	237919697	RYR2	121	TTGTGTTCAGGAAAAAGAAATGGAAAAGCAAAAGCTTCTATACCAGCAAGCCCGACTCCACGATCGTGGCGCGGCTGAGATGGTGCTACAGACAATCAGTGCCAGCAAAGGTAAGGTTCC
1	237920976	237921096	RYR2	121	TACTTTTTTATATTTCTTAGGTGAAACTGGACCAATGGTAGCAGCTACTCTGAAACTTGGAATTGCTATTTTAAATGGTGGGAACTCCACAGTACAGCAGGTAACAGCTTCCAGTCATTC
1	237923053	237923173	RYR2	121	GTGGTTTCTATAATTCCCATAGAAAATGCTTGACTACCTCAAGGAGAAAAAGGATGTGGGCTTCTTTCAGAGCCTGGCCGGCCTGATGCAGTCATGTAGGTAAGGACTCACTTCCTTCTT
1	237924231	237924351	RYR2	121	TTTTTTTTCCCTTGTTATTATAGTGTCCTTGACCTAAATGCATTTGAGCGACAAAACAAAGCTGAAGGTCTTGGGATGGTGACAGAGGAAGGATCAGGTATTAATGACTTACATTAAAAG
1	237934086	237934206	RYR2	121	TCCCTCTGGATTTCCCACAGGAGAAAAGGTTCTGCAGGACGATGAGTTCACCTGTGACCTCTTCCGATTCCTGCAACTACTCTGTGAGGGACACAACTCAGGTTTGTGAGTCCCCGGAAC
1	237935295	237935415	RYR2	121	TTTTTATCTTGCATAGATTTTCAGAATTATCTGAGAACTCAGACTGGCAATAATACAACTGTCAACATAATTATCTCCACTGTAGACTACCTACTGAGAGTTCAGGTATGTTGCTTTCCA
1	237936763	237936883	RYR2	121	CAATGGTAACTTTAGAATGTGACTTGATAATAAATAATATCATCTCTATTTCCCAGGAATCAATTAGTGACTTTTATTGGTATTACTCTGGGAAAGATGTTATTGATGAACAAGGACAAC
1	237936883	237937003	RYR2	121	GGAATTTCTCCAAAGCTATCCAAGTGGCAAAACAAGTCTTTAACACTCTTACAGAGTATATTCAGGTAAACATTTAAACATGGCTGCTATCTGTAGCACTGAACTCCATAGAAAAATGCA
1	237941957	237942077	RYR2	121	TGCTCCAGGGTCCTTGCACTGGGAATCAACAGAGTTTGGCACACAGCAGGCTGTGGGATGCTGTGGTCGGCTTTCTTCATGTGTTTGCCCATATGCAGATGAAGCTGTCGCAGGTAAACT
1	237944845	237944965	RYR2	121	GCAATGTTCATATTTTCAGGATTCCAGTCAAATTGAGCTATTAAAAGAATTAATGGATCTGCAGAAGGATATGGTGGTCATGTTGCTGTCCATGTTAGAAGGTAGTTTTGATTTATACTT
1	237946963	237947083	RYR2	121	TTTACCACCAGGTAATGTTGTTAATGGAACGATTGGCAAACAGATGGTGGATATGCTTGTGGAATCTTCCAACAACGTGGAGATGATTCTCAAATTTTTTGACATGTTCTTAAAACTAAA
1	237947083	237947203	RYR2	121	GGATTTGACGTCGTCTGATACTTTTAAAGAATATGACCCCGATGGCAAGGGAGTCATTTCCAAGAGGGACTTCCACAAAGCGATGGAGAGCCATAAGCACTACACGCAGTCAGAAACGGA
1	237947203	237947323	RYR2	121	ATTTCTTTTGTCTTGTGCGGAGACGGATGAGAATGAAACCCTCGACTACGAAGAGTTCGTCAAACGCTTCCACGAACCTGCGAAGGACATCGGCTTCAACGTCGCCGTCCTTCTGACAAA
1	237947323	237947443	RYR2	121	CCTCTCTGAGCACATGCCCAACGATACCCGACTTCAGACTTTTCTGGAATTAGCAGAGAGCGTCCTGAATTATTTCCAGCCCTTTCTGGGCCGCATCGAAATCATGGGAAGCGCCAAACG
1	237947443	237947563	RYR2	121	CATCGAGAGGGTCTATTTTGAAATCAGTGAGTCCAGCCGAACCCAGTGGGAGAAGCCCCAGGTCAAGGAGTCCAAAAGACAGTTCATATTTGACGTGGTCAACGAAGGCGGAGAGAAAGA
1	237947563	237947683	RYR2	121	GAAGATGGAACTCTTTGTGAACTTCTGCGAGGACACCATCTTTGAAATGCAGCTGGCGGCTCAGATCTCGGAGTCGGACTTGAACGAGAGGTCAGCGAATAAGGAAGAAAGCGAGAAGGA
1	237947683	237947803	RYR2	121	GAGGCCGGAAGAGCAGGGGCCGAGGATGGCTTTCTTCTCCATTCTGACGGTCAGGTCGGCCCTGTTTGCGCTCAGGTACAATATCTTGACCCTTATGCGAATGCTCAGTCTGAAGAGCCT
1	237947803	237947923	RYR2	121	GAAGAAGCAGATGAAAAAAGTAAAAAAGATGACCGTGAAGGACATGGTCACGGCCTTCTTTTCATCCTACTGGAGTATTTTCATGACCCTCTTGCACTTCGTGGCCAGCGTTTTCAGAGG
1	237947923	237948043	RYR2	121	CTTTTTCCGCATCATTTGCAGCCTGCTGCTTGGGGGAAGCCTCGTCGAAGGTGCTAAAAAGATCAAAGTTGCAGAACTGTTAGCCAACATGCCAGACCCCACTCAGGATGAGGTTAGAGG
1	237948043	237948163	RYR2	121	AGATGGGGAGGAGGGAGAGAGGAAACCCCTGGAAGCCGCCCTGCCCTCCGAGGATCTGACCGACTTAAAGGAGCTGACAGAGGAAAGTGACCTTCTTTCGGACATCTTTGGCCTGGATCT
1	237948163	237948283	RYR2	121	GAAGAGAGAAGGAGGACAGTACAAACTGATTCCTCATAATCCAAATGCTGGGCTCAGTGACCTCATGAGCAACCCAGTCCCCATGCCTGAGGTGCAGGAAAAATTTCAGGTAATTTATCT
1	237949242	237949362	RYR2	121	TTCTTTTCCCCATTGACTCATTCAAGGAACAGAAGGCAAaagaagaagaaaaggaagaaaaagaagaaACCAAATCTGAACCTGAAAAAGCCGAGTATGTATAGTTTGCATATACTTTTC
1	237951241	237951361	RYR2	121	TCTTTAGTTTCTGGAGAGCTTATGTTTTGTTTGTTTGTTTTCATAGGGGAGAAGATGGAGAAAAAGAAGAGAAAGCCAAGGAAGACAAGGGCAAACAAAAGTTGAGGCAGCTTCACACAC
1	237951361	237951481	RYR2	121	ACAGATACGGAGAACCAGAAGTGCCAGAGTCAGCATTCTGGAAGAAAATCATAGCATATCAACAGAAACTTCTAGTAAGATGTTTTAGAATGAATATTGTTACTGATATAGTGCAATACC
1	237954712	237954832	RYR2	121	TGTTTTTCACCCTCAGAACTATTTTGCTCGCAACTTTTACAACATGAGAATGTTAGCCTTATTTGTCGCATTTGCTATCAATTTCATCTTGCTCTTTTATAAGGTACGTACATCTCACTG
1	237955394	237955514	RYR2	121	TTTGAATCAGGTCTCCACTTCTTCTGTGGTTGAAGGAAAGGAGCTCCCCACGAGAAGTTCAAGTGAAAATGCCAAAGTGACAAGCCTGGACAGCAGCTCCCATAGAATCATCGCAGTTCA
1	237955514	237955634	RYR2	121	CTATGTACTAGAGGAGAGCAGCGGCTACATGGAGCCCACGTTGCGTATCTTAGCTATTCTGCACACGGTCATTTCTTTCTTCTGCATCATTGGATACTACTGCTTGAAAGTAAGATAGTA
1	237957112	237957232	RYR2	121	AAGATATGCCAGTAAATCTAAACTAATTTTAACGTATTTATTTTTCCTATGTAGGTCCCATTGGTTATTTTTAAGCGAGAAAAGGAAGTGGCACGGAAATTGGAATTTGATGGGCTTTAT
1	237957232	237957352	RYR2	121	ATTACAGAACAGCCTTCAGAAGATGATATTAAAGGCCAGTGGGATAGACTCGTAATCAACACACAGTGAGTAAATAATTATATGAGACTTTCTGCACTCAAAAATTTCAGACATGAAAAT
1	237958550	237958670	RYR2	121	AATAATACTATTTACTTCTATGCTTTTGTATATTTTAGGTCATTTCCCAACAACTACTGGGACAAATTTGTTAAAAGAAAGGTAATATTACTTGGAATCCTCTACATTTTTCTTAAAGCA
1	237961283	237961403	RYR2	121	ATGATGTTACTTAATGGTTGAAGCCAACAAAATGCTTTTTCTCATACCCCAAGGTTATGGATAAATATGGAGAGTTCTACGGCCGAGACAGAATCAGTGAATTACTTGGCATGGACAAGG
1	237961403	237961523	RYR2	121	CAGCTCTGGACTTCAGTGATGCCAGAGAAAAGAAGAAGCCAAAGAAAGACAGCTCCTTATCAGCTGTGTAAGTGTTACTTCGGCTCTATCCTACAGACTTAGATTGAAAGGGGAAAACAT
1	237965125	237965245	RYR2	121	ACTACGCATTTTTTTTTTTTGTCATTGCAGACTGAACTCCATTGATGTGAAGTATCAGATGTGGAAACTAGGAGTCGTTTTCACTGACAACGTAAGCCTACTTCATTATCACAAAAGAAA
1	237969390	237969510	RYR2	121	CGTTCTGTTTTCTGACATGTTCTTTCCCCCCGTTTTGTCTTAATAGTCCTTCCTCTACCTAGCCTGGTATATGACTATGTCTGTTCTTGGACACTATAACAACTTTTTTTTTGCCGCTCA
1	237969510	237969630	RYR2	121	CCTTCTCGACATTGCTATGGGATTCAAGACATTAAGAACCATCTTGTCCTCAGTAACTCACAATGGCAAACAGGTAAACAGTTTATCTTTTTCCTCCCTTGCAGAAAATAAAAAAGCAAC
1	237972148	237972268	RYR2	121	AATTGTATGTCCTACATTTCTAATACCTGGTCCTTGTCACATTGTTTTCCAGCTCGTATTAACCGTTGGCTTATTAGCTGTTGTTGTATACCTATACACTGTGGTGGCATTCAATTTTTT
1	237972268	237972388	RYR2	121	CCGAAAATTCTACAATAAAAGTGAAGATGGTGATACACCAGATATGAAATGTGACGATATGCTAACAGTAAGTTCATAACCTTTGATCTCACATAAACAAAAATGTCTCCTGCTTCTGCA
1	237982293	237982413	RYR2	121	GGTAATGTCCCTCCAAGAAGTGATACCATGTCTTTTTTCCAGTGCTATATGTTCCACATGTATGTTGGAGTTCGTGCTGGAGGAGGGATCGGGGATGAAATCGAAGACCCAGCAGGAGAT
1	237982413	237982533	RYR2	121	GAATATGAGATCTATCGAATCATCTTTGACATCACTTTCTTCTTCTTTGTTATTGTCATTCTCTTGGCCATAATACAAGGTAAGTATCCTCCTCACTGAAGCTGATGAACATCTAGAATT
1	237991652	237991772	RYR2	121	ATTAAATTGTGTTTTTATTTAACACCAGGTCTAATTATTGATGCTTTTGGAGAACTAAGAGACCAACAGGAACAAGTCAAAGAAGACATGGAGGTAAGCTTCTCCATTCATGACTCAGCT
1	237993819	237993939	RYR2	121	TGTTTTCTAGACCAAATGCTTCATCTGTGGGATAGGCAATGATTACTTCGACACAGTGCCACATGGCTTTGAAACCCACACTTTACAGGAGCACAACTTGGCTAATTACTTGTGAGTGTG
1	237994779	237994899	RYR2	121	CGTTCATTTCTGATCAGTTTCTCTGTATCTGTAGGTTTTTTCTGATGTATCTTATAAACAAAGATGAAACAGAACACACAGGACAGGTAGGTAAATTATTACATGTCATCTTCTGAAAGA
1	237995839	237995959	RYR2	121	TGACTTTTGCAGGAATCTTATGTCTGGAAGATGTATCAAGAAAGGTGTTGGGAATTTTTCCCAGCAGGGGATTGCTTCCGGAAACAGTATGAAGACCAGCTAAATTAAACTCAGACCCAA
2	50149055	50149175	NRXN1	121	ACAAGTGTCCATTTAAGATCTTGGGATCAGACATAATACTCTTTATCCTTGTTTTTCTTATTTTTGTTGGAGCTTTTCGCACTGCTGGGTTGTTTCTCCTTTACAACAGCCCCATTGGAC
2	50149175	50149295	NRXN1	121	TGTGCTGAGTTACTGATGTAGTTTCGACTCTCGTCCACATGGTATGAGCCTTCATCCCGGTTTCTGTACTTGTACATGGCATAGAGGAGGATAAGGATGCACAGGGCGGCAGCGGCTACT
2	50149295	50149415	NRXN1	121	ATCCCAACGACCATACCCGTGGTGCTGCTGGACTCCCGGATCACTTCTGCTGAGCCTGGATACGGCTCTCTGCCGCCTGCTCGGGTTGGGTTGGCTATAGAAAAGAGGATGAGAACAAAC
2	50170825	50170945	NRXN1	121	AAAAAAGTTGACTAACCTAACCCACCTGAGCTCGGCTCACAGGGGTCAATGTCCTCATCATCGCTGGGACACTCTGCTGAGGCCACAAGGATGTCATCTGTGGTCTGCAAAAGAATCACA
2	50280388	50280508	NRXN1	121	AATAAAATCCACAGGCTCACCTGGCTAATGGGTTCTTTTGTCGGGGGCTTTCCTCTTCTGGCTGTGCTAGTAGCCAGGGTCGTGGTAGTCTCCATAATTGATGTGGACATCTCTGATTGC
2	50280508	50280628	NRXN1	121	ATGGCAGTGGCTGTTGACTCAGTTGTCATAGAGGAAGGCACTTCACCAACCAGTCTCACATTTCCCACTATGGCGATGTTGGCATCGTTTTCGGCTGCCATATTCAGAACTTTCAAGCCA
2	50280628	50280748	NRXN1	121	TTGTAGTACAGCCCAGAGAGCTGGCCCTGGAAGGGCTGGCCCTGCTCTTTCCCGCCAATTATTATGGTTGCTTGGCTATTGAAGATTGTGAGCTGACGCCCTGTAAAAATAATATTACAT
2	50282077	50282197	NRXN1	121	ATCAATGTTTTTTACCTTTGTCGAGTAGCCATTCATCAACTACTCGACCAAGTCGATATGGAATTCGCTGTCTAGCAATCGCCAGGCGCTCGTTATCATTGTTTCCTTTAAAGTTTAAAG
2	50318426	50318546	NRXN1	121	AAAATCTTCCCCCGATACATATTCACTTGCTTACCTGCAGGGTAGCGCTCGATCACTGGCCAGCTGTCCACCTGCAACGTGGCATTGCCACCACTCCTCGTGAAACGAACTACATGGTAT
2	50318546	50318666	NRXN1	121	TTCCCATCATTAATGATTGCATTGGATTCTTCAATGGCGATGTCATCTGTCCCAACATTAAACTTAACTCCAATTTTTCCCTGGTGCTGTAAGAGAGGAGGGGAAAAAAGAGTTGAATTA
2	50463897	50464017	NRXN1	121	AAGCTGAATCTTATGCAAAAAGTACTTACTATATGCAGTTCTAGGTAGTCACCCAAGCCTGAAGAACTGTCCACTCGCACCAATACGGCTTCTTTCTGAACAGTGCTAAAACCTATGGCC
2	50464017	50464137	NRXN1	121	AGTCTGTCTGCTCGTGTACTGGGTCGGTCATTAGGAGGCCACTTATACGTGATTTGTCCACCACCTTTGCTAAAGATATATGTCGTCCCAGCTGGAAAACAAAAACCAAAACCAATTAGT
2	50573801	50573921	NRXN1	121	CGCGAGAACTTGGCATCGCAGACCCACCGTGTCCGCCTCGCAAGGATGCCGGTGACCTGTAGATTGCAATAGGCACTGAATGATGCTTGCTGCTGCCATGGAAATGGTGGATGTGGTGCG
2	50573921	50574041	NRXN1	121	CTCCCAAACTGGATGCCCCCCACGCCACTCCTAGGAGGCCGCTGAGGGTGAGCGGGACTATCCAAAGCAGGGCCAGGCGCCCCCCTGcgccgccgccgccgccgccgccgccgccgcccc
2	50574041	50574161	NRXN1	121	cgGGCGAGCCCAGCTCGGCGCCGCACCGGAGCATCCTCTGGTACATGGCGGGGCGCCCGCCGAGGGGCAGCCGCCGCGGGAGGCAAAGTTTGGGGCGCGGGGAGAGGAGAGGGCGCAGGG
2	50574161	50574281	NRXN1	121	GAGCGGGCGGCGCGGAGTGGGCTGAGGGGCCGGCCGCCTCACCGCGCCAGGGCACCCATCCTCTCCCTCCTTCGGACAGTCTTCTCGGGGTCCTGGAGTCCGCCGTGCCTAGCACCCCAA
2	50574281	50574401	NRXN1	121	ACAATCCGAAACATAGCCGAGGCGAATGCAGCTGGAGAGGGGCTTGTCCGGAAAGGCAGCCCCGGGAACAGCAAGCGCGGAGCGGGTGGCTGCTCCCAGATTTCCAGGGCTCCAGGTTCT
2	50574401	50574521	NRXN1	121	CGAGAGATACTCCCAAAGAGTTTCGGGCGAGAGTGCGTGCCGGCGGGTGGGGGGCCGAGAAATTGTTTAAAGCTCCTCCTGGAAGGTCCTCACTTCTACATGACAGACATCCACCGCGAA
2	50574521	50574641	NRXN1	121	TCCACTAGGTAAATCCATTTAGCTTTGTGTGCGGGGACTAGGGAGGCCACTTCGCCGGCCCAACCTCCTTTCAAGACAGAAGCAGACCCCATGGAATCCAGGCGCCCCTTCCCTCCATTC
2	50574641	50574761	NRXN1	121	AGCCCCGGCCGGCTCGCCCGCTAGCGCCAGCCTCCCCCGGGCAGCGCGCGGAGCAGCGGCGCGCATCGCCTGCTCCCGAGGCAATCTCCGCGTCCGCCGCCTCCTGACACTTACGCCCGG
2	50574761	50574881	NRXN1	121	CGAGGGGTTCAGAGGGAAGAGTGCGCCCTTCTGAAGGAAGTGGGAATCGAACGGCGGAAAGGCAGCTGAGAAGAAGATGCAGACGAAGGAGTAAGGGAGagaaacagaaaaagaaaaaga
2	50574883	50575002	NRXN1	120	aagaaaaaaagaaaagaaaaaCCACACACGCTGGTGAAGCAAGGGGCTCTATGCAAATCTGCAGTCTCCAAACAGCAAATCACTGAAGCTCGGATGCAATGCAGAGGACGAGCCTATGT
2	50692519	50692639	NRXN1	121	ATATCAAACAGTAACTGGAAGCAACGATGAGTATCAGTCCATACTCAGAGAGGTACTTACGGTCATTGCAGAGTGGTCCACTGAAGGAAGTCATACTACAGTCACAGCTGAAGCCATCCC
2	50692639	50692759	NRXN1	121	ATTGTTGCAAGCACACACCTTGATTGGAACATGAGTCCTCTTGGCAGGTTGTGCTGGGCCCTGCAAAACAATCCAAAGGAAACTTGGGTTCTTTAAAAGAATCCAAAAGCATTTTATACA
2	50699402	50699522	NRXN1	121	ATTATTTAGAGCATGATGACAAAAATCTAATACCTTCACATCCTCTCTCGATCTGTCCGTTGCAGAAAAGAGCATCGGAGATGAGGTCCGGAAGCCGTCCATTTAAATCAACTGATGCCA
2	50699522	50699642	NRXN1	121	GGCAGCCTTGAAAGCCTTCTTTGGCATGTACAAGTTTTGGTAAGGATTTGTATGTTTCTTTAGCTACTCCTCCTATATATAAGTCACCTGCAAGAAGATCAAAGTCTTTGTTACAAAAGT
2	50723017	50723137	NRXN1	121	TTGCTCTGACTTAACATGCACTTACTCTTGAGGTCTAAGTTCCTGGCTCCGGCGGTGATTTGCGTTGTGATTTTTGTGTCAATCTTTACAGTGTGGAGGTTGCTGGTGTCCCTTGATATC
2	50723137	50723257	NRXN1	121	ATCACGTTGTGCCACTGATTGTCATTGAGAGGTTTATTTGAGCTTCCTTTGATGAGGTTAGCACCATTTCCCAAATCAAACACGTAATGTAAGTACCTGGGAAAAAAATGAAAGAGGGGA
2	50724421	50724541	NRXN1	121	CATTTTTCCAAAGTTTTATTTATTTGCTATTGAACAGGCATGTACTCACCCTTTAACTAATTCAACCACAATAAAGTCATTTCCATCCCCACTGTTATATAGAATTAATCCATCTAGGGA
2	50724541	50724661	NRXN1	121	TGTTGTCTTGAACTGGAAAAAAAGATGCATAGAAGTGTAGGCTTGCAAGGTAGCTAAGGCAACATAGCTCGATTTGGTCTTGAAGGTGACAGGATCTGCTATGATGTTCCTGAAGCCAAA
2	50724661	50724781	NRXN1	121	TCTGGCATTAAGCTCACAGTAATCTATGTCGCCATTTTTACACAGGTCAATGTATGCCATTCCATTAAATGTCAAGCTCTGCAGGTGTCCAATGAAGTTGGAGGGGACAGAAGAAAGATA
2	50724781	50724901	NRXN1	121	CCGTCGTTCTGTGATGATGCCAGTCTCTATGTTATGGAACTCCAGCCTAGTATGATCACCTGCCATTTGACCTAAAAGAGAAGATAATATATGATTATTTTCTGTATCTGAAAGGCACTT
2	50733574	50733694	NRXN1	121	AAGAAATGAGAGTCAAAAGCGTTAGCATAGGAAAAGACAATGGGACAGAGGTGTTTACCTGTCATGGCCTGTTGGTCATCCACTGTTAACTTTAAACTTTTTCCACGCCGAACTACACGC
2	50733694	50733814	NRXN1	121	ACTGTGTGCCACTCGTTATCATTGAGGTTATAGCCAGCAAAAAGAGTCTCGGGACCTTTGCCTGTAGAATATGCCAAACAGTCATTATGGACACTCAGAATCAGTCAAGCAAATGAACCT
2	50755715	50755835	NRXN1	121	ATCATAATGGAGGAATAACATTTTAAAAATTTTGAATAGGCACTTACTGGAATTACAGTTAATCCTGATACAATCTAGATGGGGAAGAATAGATGAAAAATGAAAATTCATCCTTCAAGG
2	50758346	50758466	NRXN1	121	GGGAAGGCAGGTTGTTACCTAGATTGACCGTCAGTTTCACACGTCCTGCGTCTAGCTCCAGGCGGAGGGTGTCAGCAGAGTCTCTAGAAGTGGTTGCCATCAGAATGCCATATGCACGCT
2	50758466	50758586	NRXN1	121	GGGATCGGAACCGTAAGGAAACATCCTCAGCCTCCGTATGCATGACTACGGGGAGCTGAATTTTCATAAACATGCTCCCATCATAGCTCAAAACCGTTGCCTCTAGAGATGGAAAATGAA
2	50765342	50765462	NRXN1	121	TAAACTTTTCATCTCAGGGAGTTGGCTGCTGGGGTTTTAGAATCCTACCTCTCTCACAGGACCTGCCAAGATAGCCTGTTCCGGAACAATCACAGACATATCTGTTCCACCCATCCCTGC
2	50765462	50765582	NRXN1	121	ACATGCCATTGTTTTTGCAAGGGTTGCTAAGGCACGGTTTTGCTGTTTCCTTTGAGCAGGAAGGCTTCACTCCAGCAGTACTTTGAACTTCAGCCATTTGCCGGATATCTTTGCTTTGGC
2	50765582	50765702	NRXN1	121	CATCGATGAACAAATCCCTGATGCAGCCCACGTAGCCATAGTTGAGCAGAGCAGTCCACACCTCGGTGGGGAAGACAAGGCCAGCTTTATTTTCTGGCAGCCCCCCCAGGTACAACTCAT
2	50765702	50765822	NRXN1	121	CATCCAGGTCCAGAATCTCACTCTCACCAGGAGCAGTGTAGGGAGTACGCAACGTGTTGACAGAAATGGTACCTATTTCAAAGAGAGGAGAATGCACAGGTCTTTAAAAAGCACCAACGT
2	50779703	50779823	NRXN1	121	ATAGAAAAATGATAAGATTACCTGACCGTCCGTCTCTCTGGAAGTCCACATGATACCATTCTCCATCATTCACTTTCTTCAACAGGGCTTTTATTTTTATAGTACCTGACCCCATGTCCA
2	50779823	50779943	NRXN1	121	GGAGGAGGTAGAGGTGGCCATCTAGCATCTCAATAGCAAAGAAGTCCACCTTTATCATCTGTGGGTGCTTGGCATCTTTCTGATGTCTTGGCTTGCCATGGCTAAATAAGATGAGGCCAT
2	50779943	50780063	NRXN1	121	TTGGCTCTGTTGTACGGAAATCAAATGATATGGAGCCAGTTTTCTTTGCATTCCATTTAGGCAAAGAGATGAAAGACTCTGGGGTTTCAAAGGTGATTGGGTCTAAAGTTGCAACATTCT
2	50780063	50780183	NRXN1	121	CACATTTAAATGCCACCACTCCATGGATCTTCATCTTAGGATCTCCTTGCTTGGCAAGTCGAGATAATTCCAGCCTCACATCATTATTTTTATATACAACCTGTGGGCAGAGGATAGCAG
2	50847120	50847240	NRXN1	121	CCATGAATTAGGAATGATTCTGATGGCAACGATATTTACCTCTTTGAGACAGCCCATAAAGTTGTTACTGACTGGTGACCCTGGAAGGTCGGCTGTGCTGGGACTGCCTCCAACATAGAA
2	50847240	50847360	NRXN1	121	AAAGTCATCAGACCCCAGCATGGTATAATCTTCTTGCGTGTAGCCCGTTGTGGTAAGAATCCCATCCACTGATATTGTCACCTAGATAACAAAGCACAGGGAAAGGACACGCTATACTCA
2	50848305	50848425	NRXN1	121	CAAACCCAAAATAAGAAACAATTAGAATGATATCTACCGAACAATGTAGTTTGTTTACCATAGCGTGTCCAATGCCTGAGTGCTTTGTGGAGAAGGGGGGAGAAAGGAAATTAAAAACTG
2	50850422	50850542	NRXN1	121	AGTTACTCTCTTATCCACTGCGCTGTTACCTGACGCAGATTCCTGGTGACTTTCACATCATGCCAGGCATTATCATTAAACTTTCCATTCACAGGCTCCACTAGTGCTTCAAAGGCCCCT
2	50850542	50850662	NRXN1	121	GATCCCAAATTAATGACCAGAGAGACAGCTCCATTTTTCAGGGCAAGATTGACATAATCAGCCGATTTCCCAGTGTGAAGCATCAGTCCATTCCTCTGAAGGGTTTTAAATGACAGAGTT
2	50850662	50850782	NRXN1	121	ATTTCATCACTGCTGCTTTGAATGGGGTTTTGAGACAAGTCGTAGCAGAAGTATTCAGATCCTTTGAACGTGGCAATATATTCTTCTTTTCCTAGAGGAAAACAGATGATACATACATAA
2	51148952	51149072	NRXN1	121	GACACACTGTAATTCATACAGATGATATTAAGAAGAAATAAAATAATGTAATACCTTTACTTTTACCTATGGATTTGATGAAATGGGTCCATGAAGAAAGGGTTTCCAGACAAAGAGGAT
2	51149750	51149870	NRXN1	121	CAAGAAAACACTGAAAGCAGAGTGGAAAAGGAACAGAGCCCATACCTTGGTCGCCCATCATCAGGTGCGCCAGACCTTGAAGGGAAACAAGAGCACAGTCAGCAATAAACAAGGGAGCAT
2	51153024	51153144	NRXN1	121	AAGAAATAAAGGACAAATGAGAGTTGGAAAAATAAGGTAGAAAGCACCCACCTTCCACATTGTTGTCTTCTGAAAGCACATGACAAGGAGGGAGAGAAAAGGAAAAACATTCATTAAGCA
2	51253497	51253617	NRXN1	121	CACTCACTCACTTTCTGTTAGAGGCTTTGCTGTATTTATACAACAGTATTTTCCTTGGTCATTGTCATGTAACAGCACCGGCAAAACACACTGAAGACCGAATTTTATTTCTAAAGAGGA
2	51254605	51254725	NRXN1	121	CCCCGGCCCCCGTGGGTCGGGCGTCGGGCCTTACCTTGGCTGCAGTCCTTGCCGCGGAAGCCGGTTCGCGAGCAGTCGCACACGGCCTGGTCGTCCACCACGGAGCACACACCTCCGTTG
2	51254725	51254845	NRXN1	121	AGGCACACCCCGCCCTCGCCCTCCTCGCCCGCCTCGCACGGGCTTCCCCCGCCGCTGTTGGGCGGCTCATCGTCCAGCTTCACCTCGCCGCTGTCCACGGGCAGGACCTGCGAGGAGTTG
2	51254845	51254965	NRXN1	121	ACCCTCACGTCACGAATCCACCCCTTGAAGGGCTCCCGCTCCCTCACCGAGGCCAGGGTGAGCTTGAGCGCCGCGGCGCGCAGTTCCGGGGGCAGCCCCCCGACGAAAAGGCCGCTGAAC
2	51254965	51255085	NRXN1	121	ACCGTCATGTCCCTGCGCTTGGACTTGACCTCCACCCACTTGGCCTCCACCTGGTCGATGAAGAGCGTGGTGTTGCGGAACTGGCGGCGGATGCGCACGCTGTGCCAGGCGCCGTCGTTA
2	51255085	51255205	NRXN1	121	ACCGGCGTGTCGGCCAGGAGCGTCGCAGGCTCAGCGCAGAAGATGGAGAAGCTGAGCTGCAGGCGGCCGCCGCGCGTCAGAATCAGCTCCAGGAAGTCGCAGAAGCCCTCGTCGTCGAAG
2	51255205	51255325	NRXN1	121	TAGAGCACGAGGCCGCGGGCGCTGCGAGTCTTGAGCTGGAAGCTCATCTCGCTCTCGCAGCAGGCGTTCCACTTGGGGAAGCGCGTCCATTGGCCCTCGGCGCCCGGAAACTCCAGCCCG
2	51255325	51255445	NRXN1	121	CTGCCCAGCTCCGCCCAGCAGCCCAGGAGCAGCAGCGAGAGGCACAGAAGAAAACAGCCCCCGCGCTGGAGCAGCGCCGTCCCCATGCTCGGGGCTGGGGTGCGGCGGGGGGGTGCCGGG
2	115200325	115200445	DPP10	121	GGGATTGTGCACTGTCCAGGGTCCTGAAACATGAACCAAACTGCCAGCGTGTCCCATCACATCAAGTGTCAACCCTCAAAAACAATCAAGGTAGGATCTGGTTTTTCCCTCTGCTTCTGC
2	115219148	115219268	DPP10	121	TTATCATATTGCATTAAACACTTGATGAAAGAAGACCTAGAAGGCTTTAAGAAAGACAGGGTAATATTTTGCTGGTGTAGAGGGCCTGCTCTTCGGAGACAAATACTTGCTTTTCATTTT
2	115219268	115219388	DPP10	121	GATCAGCCGTCTGCACTTAAAAGCCTCCTAGCCAGGGACATGTTAATTAAACAGTCTGGGGCTCAGTGCTGCCATCCGTAAATTGGAGGATTAGAGAAATAATATACACAAGTACCTGGT
2	115219388	115219508	DPP10	121	ACATACCAAATATGATAGAAGATATCTTCAACCTTTAGCTATAAGAAGAATGGAAAATGAAAAAGAGACAGGTGGAGAGAGGGAGGGAGATGAGAGCTGCGTGGAGCTGGTATGCTGGTT
2	115219508	115219628	DPP10	121	AGGAGGTAGGAAATAATGAGGCCTCGACCATCTAAGATACAGAAGTCTCCCTGCTGAATCGAAAGGAAGTGCTACAATATTCTTTCAAATTCATCGCAGTTGAGAGAAAACTGGAGCAGA
2	115219628	115219748	DPP10	121	GTGTGATATCAAGAAAGGGCTTCACCAGGATGATCAATGCAAATGGATATGGAGCTTTCTTGGAATGAAACATTATCCCGTAACACCAGGTAATTTTCTTTATTAAAAAATACACATTAA
2	115822194	115822314	DPP10	121	TGCTTCCTGTACTTATATGTGAATAGCAAAGTGTTGAGAACTGGAAGCATGAGTGAGTGACATGCAAGGAACTGACATTGAAGTAAGATTCTGTGAGGGTGAGGTTGCATTTGTAGAAAG
2	115822314	115822434	DPP10	121	TGGTTATAGTCCACTTAGCAATGGTCATCACAGAGGTGGCTGAGGGACCAGTAGATGGTTCTGAAAAGGTAAGTGGATGCTACCTAGGTTTGTTTAGTCTTCTTTCTAGCAGGGTTTCTG
2	115919498	115919618	DPP10	121	CGCGAGGAAGCGAGCGCCAGCGCGGGCCGCCGGCGATGACGGCCGCGAAGCAGGAGCCGCAGCCCACCCCGGGGGCCAGGGCGAGCCAGGCGCAGCCGGCGGACCAGGTGAGAGTCGGCA
2	115919646	115919766	DPP10	121	GGCTCCAGTGCGCGCTCCGCCCGCCTCCCGCTTCCCAGGCTGGGCTCCCGCGCCTCCCTCTTCTCACCCTCCCCCGCCCCGCCCCAGTTCCAGGCTCTCCTGCTTCTCCACGGACTCTGC
2	115919766	115919886	DPP10	121	GGGAAGTTAGAGCCTCTGCGTGCGCTCCGGGGCCCGGCGAGAGGATGCGCAAGGTGGAGAGCCGCGGGGAAGGGGGCAGAGAGGTAAAGGCTGAAGGTGCCCCGGGGAACCCCGGCGGGC
2	116066812	116066932	DPP10	121	AGGAACTGGGAAGTAACAGCCCTCCACAGAGAAACTGGAAGGGAATTGCTATTGCTCTGCTGGTGATTTTAGTTGTATGCTCACTCATCACTATGTCAGTCATCCTCTTAACCCCAGGTA
2	116101380	116101500	DPP10	121	CCTTTATTTTAGATGAACTCACAAATTCGTCAGAAACCAGATTGTCTTTGGAAGACCTCTTTAGGAAAGACTTTGTGCTTCACGATCCAGAGGCTCGGTGGATCAATGGTAAGTGTATAC
2	116257073	116257193	DPP10	121	TTGTTGTTGCAGATACAGATGTGGTGTATAAAAGCGAGAATGGACATGTCATTAAACTGAATATAGAAACAAATGCTACCACATTATTATTGGAAAACACAACTTTTGTAAGTAATGAAT
2	116283451	116283571	DPP10	121	TGGTTTTTTTTTCTTTTTCTAGGTAACCTTCAAAGCATCAAGACATTCAGTTTCACCAGATTTAAAATATGTCCTTCTGGCATATGATGTCAAACAGGTAAAGGAGTGATCTTCTTTGAG
2	116447228	116447348	DPP10	121	GCTATGATCAATAATGTTTCTTTTTTAATTTCAGATTTTTCATTATTCGTATACTGCTTCATATGTGATTTACAACATACACACTAGGTAAGTTCTTTGATTTTCTAGTTTTCATGAGCA
2	116447396	116447516	DPP10	121	ATATTCACATTTTTTCAAGGGAAGTTTGGGAGTTAAATCCTCCAGAAGTAGAGGACTCCGTCTTGCAGTACGCGGCCTGGGGTGTCCAAGGGCAGCAGCTGGTAAGCGCAGGCATTGGTA
2	116485331	116485451	DPP10	121	AGTTTCAAAAGGCATCCTAACGTGTTGGATTTTTTGTTTGTTTCACATTTCCTGATCCAGATTTATATTTTTGAAAATAATATCTACTATCAACCTGATATAAAGAGCAGTTCATTGCGA
2	116485451	116485571	DPP10	121	CTGACATCTTCTGGAAAAGAAGAAATAATTTTTAATGGGATTGCTGACTGGTTATATGAAGGTGAGTTGATCAGATTTAGTTTCAAAGGAAACAAATGACATATTTTTATACAAAATCTA
2	116497272	116497392	DPP10	121	ACATCTCTACAGTTGGTCTCAAATAACACTCATTTATTCTAGAGGAACTCCTGCATTCTCACATCGCCCACTGGTGGTCACCAGATGGAGAAAGACTTGCCTTCCTGATGATAAATGACT
2	116497392	116497512	DPP10	121	CTTTGGTACCCACCATGGTTATCCCTCGGTTTACTGGAGCGTTGTATCCCAAAGGAAAGCAGTATCCGTATCCTAAGGTAAGTAACATGGAAGTACTATTTTGTTCCTTCTCTCTCTCTG
2	116503650	116503770	DPP10	121	TTTTCTCAAAGGCAGGTCAAGTGAACCCAACAATAAAATTATATGTTGTAAACCTGTATGGACCAACTCACACTTTGGAGCTCATGCCACCTGACAGCTTTAAATCAAGGTATGCAATTT
2	116507547	116507667	DPP10	121	CTTGTCTCTGTCTCTGTGGCTCAAGAGGACCAGATCCTCGAGGACTTCCTGGGTAATCCAGAGCCATGGAGACTAGGAACAAGCAGGAAACCCAGTTATAAGAAAGGGACACTTCTGCTG
2	116507667	116507787	DPP10	121	GCCACTGGTCGTGGAACACCAGATCTAATGTGTTCATGAGATGGAGTTCCAGGAGGACAGCTACATCTGCAGCAGGCAGGCCAACGAGTGTGACATTTCCAGGTAAGGGTGCTTCCCTAC
2	116510691	116510811	DPP10	121	TGGTACTATATCAATGCTCTGGCTCTAAACATACATTTTAATTTTGTTTCCAAACTAGAGAATACTATATCACTATGGTTAAATGGGTAAGCAATACCAAGACTGTGGTAAGATGGTTAA
2	116510811	116510931	DPP10	121	ACCGAGCTCAGAACATCTCCATCCTCACAGTCTGTGAGACCACTACAGGTGCTTGTAGTAAAGTGAGTATAATTTATTTTTCTTTTATGCCTAAAATGAAGTAGCTTATGCAGCTTTACA
2	116520107	116520227	DPP10	121	GGTCTTTAGATGCTTCATGGAGTTAATTGTTTTGTTTCAGAAATATGAGATGACATCAGATACGTGGCTCTCTCAGCAGGTACAGTATAGGTGGTCTGTCACATCTTGGCCATTGTGACC
2	116525866	116525986	DPP10	121	TTTTAGAATGAGGAGCCCGTGTTTTCTAGAGACGGCAGCAAATTCTTTATGACAGTGCCTGTTAAGCAAGGGGGACGTGGAGAATTTCACCACGTAGCTATGTTCCTCATCCAGGTAAGT
2	116534769	116534889	DPP10	121	CTATTTCTTTGCAGAGTAAAAGTGAGCAAATTACCGTGCGGCATCTGACATCAGGAAACTGGGAAGTGATAAAGATCTTGGCATACGATGAAACTACTCAAAAAATGTGAGTGTTTTCAG
2	116535326	116535446	DPP10	121	GTGTCTAATGCTTGTGTTGTTTTCTTTCCTGGACAGTTACTTTCTGAGCACTGAATCTTCTCCCAGAGGAAGGCAGCTGTACAGGTAAGCAGTGTGCAAGGATCTCCTTACACAGATTGG
2	116538390	116538510	DPP10	121	CACATTCAAGTGCCTAGAATAGTAGCATTTCTATAATAACTTCCTTTTTCTTTCTCCAGTGCTTCTACTGAAGGATTATTGAATCGCCAATGCATTTCATGTAATTTCATGAAAGAACAA
2	116538510	116538630	DPP10	121	TGTACATATTTTGATGCCAGTTTTAGTCCCATGAATCAACATTTCTTATTATTCTGTGAAGGTAAGATAATACATGAATTCTGATATAATATATTTTATTCATTGTATTTGGTCAATATC
2	116539891	116540011	DPP10	121	TTTAAAAATATTTATACACATATTTTTAAATTCCAGGTCCAAGGGTCCCAGTGGTCAGCCTACATAGTACGGACAACCCAGCAAGTGAGTACACAAGAAGACAATTAAGAATAGTTATGG
2	116548646	116548766	DPP10	121	TGGTTTACAGAATATTTTATATTGGAAAGCAATTCTATGCTGAAGGAAGCTATCCTGAAGAAGAAGATAGGAAAGCCAGAAATTAAAATCCTTCATATTGACGACTATGGTAAAATTTTG
2	116548837	116548957	DPP10	121	TAATATTTTGCTCTTTCTTTAAAAGAACTTCCTTTACAGTTGTCCCTTCCCAAAGATTTTATGGACCGAAACCAGTATGCTCTTCTGTTAATAATGTAAGTATTTTATTTGTTTTTAAAA
2	116572346	116572466	DPP10	121	TCCAATATGTTGGTATTTGCAGGGATGAAGAACCAGGAGGCCAGCTGGTTACAGATAAGTTCCATATTGACTGGGATTCCGTACTCATTGACATGGATAATGTCATTGTAGCAAGATTTG
2	116572466	116572586	DPP10	121	ATGGCAGAGGAAGTGGATTCCAGGGTCTGAAAATTTTGCAGGAGATTCATCGAAGATTAGGTTCAGTAGAAGTAAAGGACCAAATAACAGCTGTGAAGTAAGTGGATGCACATTTTTCTT
2	116573218	116573338	DPP10	121	GATATAACTATTGTTTTTCGTTTTCATTGCAGATTTTTGCTGAAACTGCCTTACATTGACTCCAAAAGATTAAGCATTTTTGGAAAGGTAAATAGTAGAAATGCTGAATCTATCTTTTTA
2	116593722	116593842	DPP10	121	TCCCCCCCAGGGTTATGGTGGCTATATTGCATCAATGATCTTAAAATCAGATGAAAAGCTTTTTAAATGTGGATCCGTGGTTGCACCTATCACAGACTTGAAATTGTATGGTGAGTACTT
2	116594052	116594172	DPP10	121	TTCTCGAATGTCTGTTTTCTTGGGTCACAGCCTCAGCTTTCTCTGAAAGATACCTTGGGATGCCATCTAAGGAAGAAAGCACTTACCAGGTAACTAATTTGAAAATAACAAAGAAAGAGG
2	116594225	116594345	DPP10	121	AGATATTTGTATTTTCCTTTATAGGCAGCCAGTGTGCTACATAATGTTCATGGCTTGAAAGAAGAAAATATATTAATAATTCATGGAACTGCTGACAGTAAGTATTATACTTGCCGCTGC
2	116598302	116598422	DPP10	121	TATCATAATTTGATTTCTTGCAGCAAAAGTTCATTTCCAACACTCAGCAGAATTAATCAAGCACCTAATAAAAGCTGGAGTGAATTATACTATGCAGGTAAGCTACTTTCTTAGAAGAAC
2	116599734	116599854	DPP10	121	AGACAATAGCTTCTTGGATAATTTGAAATCTTCTTTCTCCTCAATATCTTAGGTCTACCCAGATGAAGGTCATAACGTATCTGAGAAGAGCAAGTATCATCTCTACAGCACAATCCTCAA
2	116599854	116599974	DPP10	121	ATTCTTCAGTGATTGTTTGAAGGAAGAAATATCTGTGCTACCACAGGAACCAGAAGAAGATGAATAATGGACTGTATTTATACAGAACTGAAGGGAATATTGAGGCTCAATGAAACCTGA
2	167262082	167262202	SCN7A	121	AGTGGTATTAGATCTGGCTTTGAATAGGTGACTTTTCCTTAGCTTTGTCAAAATAGGCACCTTCTTTAGTAGCATGAACATCTCTGTCACCATCTATCATATGAATATCTGATGTATTTT
2	167262202	167262322	SCN7A	121	TGTCATTTCGCCTCAAGCGGTAATTTTTATAAGCACGTTGAATGATGGTTGCTGAAACTGCCTCTTGTTTTCGTTTCAAAGTAGTCGTAATTGGCTCACATGTGATCTTAAAAGGGTTGG
2	167262322	167262442	SCN7A	121	CTAACAAAAACCCTGATTCTATTTCTGAAACAACTTTCTCCATCCTCACATCTTGACCCATAACTCTCTTTGTAAAAGCAAGTAAGATATCGAGGCAATGAATTCTGTCCCCAACAGCCA
2	167262442	167262562	SCN7A	121	TGGGGAGGTCCAAAGCAATGAGCTGGCCCTTGTTTGGTTTTGCCATGAAAAGAGGAGGATCAAGAGCAGCTGCAAAATCTGAAAGCTTGCTAGAGTCTATGTACTGGGTCCTATCAGGAT
2	167262562	167262682	SCN7A	121	CAAACCTTTTCCATACCTGAAAGAATTTCCTAAAATCATCTTCACTCAAGGTCTTGTTTTTCTTCTTAGAAGCAATATTTAAAAACTCCATGACAACAACAATGTACATATTTACAATGA
2	167262682	167262802	SCN7A	121	TCAGCCATGATATGAGGATATAACTGACAAAATAAAAAATCCCAACAGAGGGGTTCCCACAATCTCCTCTAACTTGAGTCCCAGGGTTAATTTTATCAGGATCACAGTCAGACCATTTAC
2	167262802	167262922	SCN7A	121	TGTTGAAAATTGCATCAAGCATCCCATCCCAACCAGCAAATATTGCAACTTGAAAAAGACAGAGCATACTGTTGCCAAAGGTTTCAAAATTAGACACATCATTAATTCCAGCTTCTTTTT
2	167262922	167263042	SCN7A	121	TAACATAGGCAAAATTATACATTCCAAATACGGCATAGATGAACATGACCAGGAAGATGAGAAGAATGATGTTCAATAATGCTGGGAGGGACAGCATCAAAGGAAGCATCAGATTATGAA
2	167263042	167263162	SCN7A	121	ACACCTTTGGTCCTTTTCCAAGACGCAGCATGTGAATGATCCGTGAGAGAAGTATCAGTTGCACAAGTGAAGGAGGCACAAGGTAGGATCCTACTGTCATAGGCAGACATAGTCCTGGGG
2	167266129	167266249	SCN7A	121	AATTAATATTATTATCAGTAAAAATTTGACTAAACAAAATCTTACCTGTGATGGAGAAAATAACCACCATAAAATCAAAAATGTTCCACGCAATGGTGAAATAAAAACAACGGAAAGCGA
2	167266249	167266369	SCN7A	121	TGAGCTTCAGTATACATTCCATAGTATATAGCATAACAAAAATTGAGTTAATCCAGTAGAGAGCAATGGACATTTGTAGACTCTGAACATCAGTGTCTATCATCATGGCTATTGCTTGGA
2	167266369	167266489	SCN7A	121	AACATATAAGAACCATAACAATGACATTAAAAGCTTGGCTTGTTACCACATCAAAGATGAATCCTTGGAGCTTGTTCTGTGGGTAAAATCAACAGGTGTAATAGTCTTATTAATAGGATA
2	167266722	167266842	SCN7A	121	TTCTTACTAATGGGCGAGGTACTGGTCTTTGAGAATCCTCATACATTAGCTTCTTCAGCCTGCGGTACTGTTTTCTCTGTTTAACCGTTATAAAGATATTTGAGCCTCCCAGGTAAAGAA
2	167268988	167269108	SCN7A	121	GTATGCCTGATTTTCTCAGACATTGGATAAACAAATAATATTTATACTTATCTTTATTTTATGCTTGTTGAAATTATCAATAATAACAGTAATCAGCATACTCAGAGGGAGAAATACTCC
2	167269108	167269228	SCN7A	121	AAATATAATAAAGTTGATAAAGTAACAATACATGTAGATGTTGACTTCAAAATGAGGCTGTATATTAACCTAGAAGTTTAAAATAAGCAAATTATTGATATTGGCTTTTTAAAACAAGTT
2	167269544	167269664	SCN7A	121	CTAACAATGGCTTTAAAATGATATTATACTTACAGCAACAGAATCAATTGCTGAATTCATAATAGTGATCCATCCATTAAATGTTGCCTGTAAAAATAAAATGCATTTAAAATTTATGCT
2	167273175	167273295	SCN7A	121	TGAATATATAATTAATAAGGAAAAGTCAAAAGTGTACTTACTACTTGAAGCAGAGAAAGGAAACCATTTCCAACATTATCAAAGTTCATTTTTGCATTTTCCCATAGCATGGATTCGTTA
2	167273295	167273415	SCN7A	121	AACAGAAGGCTTTCACACCGACTCTTATTCATGACTTCAGATGAAGGAAACCTTTCTCCACTTGTTGGGTCAATGCATTCATAGAATCTGCCAGCAAATAAGTCTACTCCCATGATACTA
2	167273415	167273535	SCN7A	121	AAAATCAGCCAGATCATCAGGCAGACAAGAAACACATTCAAAGTGGGTAAGGTTGTTTTGATCAAAGCTCTCACAACCACCTGGTATATATAAAAAATGTAAACTTTAGATAGGAAATCT
2	167277693	167277813	SCN7A	121	TCTTACCTTCATTCTTTCAAATTGAGATAGAACTCTGAGGGGCCGAAGGAATTTCATGGAAATAAGAGGTTTTAGTTCTTCCCGAGTTTTGCCTATTAAGCTAAGACAAAACACCtatat
2	167279735	167279855	SCN7A	121	CAAATAGCCTTTCATTTTCTTTAAAATACGTACAATAACAACCACGAAGTCCAGCCTGTACCAGCCATTAGAGAAATAGGCCTTAAAACCATATGCCATCCATTTTAGAAGCATTTCCAG
2	167279855	167279975	SCN7A	121	AATGAAGATATAAGTAAAGATCATGTCAGCATATTCTAATAAAATTTTAATTGTCTTTCTCTGATCCATATATATATCTTCAAAAGCCTGTGGGTAAAAATAAAAAAATAAGGATTAGGT
2	167284254	167284374	SCN7A	121	TTTGTCCCCAGCAAAGTATCAAACACCCTGGCTGCCCACTTACCAGAGTGCCAGTGCTGAGCAGAGTAACAAGCCCAATAAAACACTTAAACCAATTGTTCTCTACAATCTTGCAGCAGG
2	167284374	167284494	SCN7A	121	TTTTCCTGATGTTCTGCCAGATTTTTCCTTTCTTGGATGCTCCACTGATTTGACCAAGTGAAGATCCGCGTCTGCAACCTGTCAAGATTGAATTGGTAAGAACAACAATCTAGAAAACTC
2	167285671	167285791	SCN7A	121	TTCTTACCATTTTTCAGATGCTTTGATCTTTCACCTCCATAGAACATTTCTTCTTCTTCAGAGATAGCAATATCAACAGTACTGCATTCAGATGAGCTAGATTGCTTTATTTTCTAAAAG
2	167288804	167288924	SCN7A	121	ATCAGGATATTTAAACATCTTACCTCTTTGCTGCCTCCATCACCAGACTTACTCTGAATCTCCTTATTATCCAGATTTTCTATATCAGATTCTCCTGAAGCAATTGGTACAGTTTCTGAG
2	167288924	167289044	SCN7A	121	ACACTAGGACTGGGGATAAGTGATTGGCTCTCATTTTCAGTAGCGTTTTTCTCTGTGCCACTGCTTTTTTCCTTATCTTTGAGAAAATCTTGGGTGTTGCTCAATTCAGAAAGGGTATGG
2	167289044	167289164	SCN7A	121	TCAGAAATATCTTCTTTAACATATACCTCATTTACATGGTCCATTGTGTCCTTTGGGACATTTTGTGTTTTGCATAGTATTTTAAGAAGCACATAGTTTATTCCTTTTTTAATTCTTGCC
2	167289164	167289284	SCN7A	121	ACTGCAAGCTGGAGATTTTTTGCTTCATTATTCTCTTCAGCTGTTACATCCTTGCATGAACTAAATGAGCTCACCAATGCCAGAAACAGGTAAAGTACCTAAATAAGGAAGTAAAATGAG
2	167297904	167298024	SCN7A	121	CCAGTAAATTTCCAATTAAAATGACCATCAGGTAAAAAGGAATACACCAGGATTGGCCTGCAACCTCCATACAGTCCCACAAGGTCTCTACCCACTCTCCACAGAGAATTCGGAACACAT
2	167298024	167298144	SCN7A	121	TCAGGAAGGAGTGGAAAAAGTCATGCATGTGCCAGCGTGGGAGTTGACAGTCTTTGTCTATGTGGCAGACAAATTCTTCATAATTCTTACCAAACAGCTTCATGCCGAATGCAGCAGAAA
2	167298144	167298264	SCN7A	121	AGAAGATGAATGTGAACAACAACAGGACCAAGTCTTTCAGGGCCACCCATGAGTTACTAAGAGACCACATCAAAATCTGGAATGTTGGCCAATACTTTCCCAACTTGAAAATTCTTAACT
2	167299979	167300099	SCN7A	121	TCAAATAAAAGTTAGGTATTGGATTCTACTTACCATCCTGAATAATCGAAGAAGAGCCATTCCTGCAACATTTGCTAGACAAAGTTCTATTAAACCATGGAACACTATCATGCTATCAAA
2	167300099	167300219	SCN7A	121	AATGTTCCAACCTACTTGGAAATACCCATATGGATGCATTGCAATTATTTTAAAAATCATTTCTGCTGTGAAAATTCCAATGAAAACCTAAATCAAAACCAAATACATAGGTGAGAATAT
2	167301271	167301391	SCN7A	121	CAGGTTTCCAATGTTGAGAAGAGTGTTAGTTTGTTTACTCATTGGATAATGCTCCAAGGTCAGAAAACATACGTTTAAAATTATGCATATGATAAGGAAAAGATCAGTAAATGGTGCCAT
2	167301391	167301511	SCN7A	121	TATAATCCTATGGACAAACTCTTTCAATTTTAACCAACAGGGAGAACAATTCCAGATCAAGAAAGTTTTAGCAAACTTATACCAGTATAATGGGCATATCTTCTTGGATTTTTCAAGTTC
2	167304110	167304230	SCN7A	121	TAGTACTTTACCTTCCTTATGTCTGAGAGTAGCATCTTCCAACACATCCAATGATGTGTCTGTGGAAATTGGTGACCTTTTCTTCATTTCTATTTGTATGGTCTTGGCCTGAAAAGGAAT
2	167313362	167313482	SCN7A	121	tagatagataTAGATACCTCATCTGTTTCATTTCCTTCTTGAAGTTCTTTTCCAGTCTGTTGAAATTTTGGTTCAATCTTCTTAGATATTTCACCAACTCTCTGCTTTTCTTCTTCATAG
2	167313482	167313602	SCN7A	121	GCCATGGCAAGTATGCCTAAGAACAAACTTGCCATATAAAAGGAAAACAAAAAACTTACCACCACAAAAAATATCATGTAGACCTTCCCAGAAGCATAAAGTATCTAAGGAAAGGTAGAA
2	167318849	167318969	SCN7A	121	AGGGCATGGTGCCATTCCTAAGTACAGTACAATTTCTCTCTGTTCTTACCTGGTGATAAAGTACTTCAGGGTAATCCTGAGCCATTAACCGAAATAGGGCAAATAAGGCCCAGCCAAAAC
2	167318969	167319089	SCN7A	121	TGTCAAAATTTGTGAAGCCTTGATCAGGATTTATGCCAGCTTTTACACACACATATCCTTCAGGACACTGACTAAAGAAGACAAAGAAAAAAACCTGCTTACTATTAGGTGACTATCAGA
2	167321946	167322066	SCN7A	121	ATAGAATAAAACTAATACCACCTACCCAGCATCTGTCCTGTTGCCACAAAGGAGAGCATATCTTTCTCCTTCCAAATAATAAAAGTTTTCTGTTTCTGAAAAACAGGCAAGAAATGATAT
2	167322273	167322393	SCN7A	121	GGCAAGGTGATTCTTACCTCGAATATAATATGGGTTTCCAGTTCTGTTGTGCAGGGTTTCATTTTCATTCTCTTGGGGCCATCGAAAACATTTATGTTTCAAGTTGCCCATGAAGAGCCC
2	167322393	167322513	SCN7A	121	CATCCCAATTAGAGAAAATATGCTCAGAAAAAACAGAGTTAGGATAATGACACCAATAAGCTGCTTCAAGCAGTGGATCAGGACCCCTACAAGGGATTTCAGACCTGGAAAGAGAAACAT
2	167327110	167327230	SCN7A	121	ATGCAATTTCTTACCTTGATTTAAAGGAATAATTTTTAAAATTCTCAAAGTTCTTGCAGTTTGAAGCGTTGGAATGAAGTCCAGAGGTGAGTATCTTATAATAACCCTGTGGAATTAAAT
2	167328771	167328891	SCN7A	121	AAAAACATTTTCTGAGCAAAACATTAAAATAGACTCAATTTAAAGAAATACTCACTCAAACACAGTTACGCTGAAATCGAGCCAGTTCCATGGATCACCGAGGAAGGAAAATGATCCTGC
2	167328891	167329011	SCN7A	121	CCAGACACCTCTTGCAAAGAGTTTTACAAGTATTTCAAATGTGTAAATTCCAAGCAAAGTATTCCTGCAGAAATTTTTTCATATAAATATTATTGGTGAGAATAATACATTGTCAACTCT
2	167330293	167330413	SCN7A	121	aattatataacatactctaataCTGGTCTCCATTTTGGCAAATTAGTCAGGGACATGAATACGCAATCAATCAGGACACTAATTAGAATAAACAGTTGGAAAAAGGTAGCTTATAGTCAA
2	167330734	167330854	SCN7A	121	TGGATGTACCAAAACCTTGATAGTTGTTCTTCTAATACAATTGAAAGGAGACAATGTACACAAGATGGAAGCCGCATTGAATCTGAAGATTGTTCTATTTTTATTTAATACTATGAAAGT
2	167333969	167334089	SCN7A	121	CACATTTTTTTTCTTGTAGTAATATGGGTCCACATCTTCCAAGGGCTCTGACACCATTCCTTGAGAAAGGTTTCCATAAATAAATGGAAGCTTTTTGCCAACTTCCAAATCAGGAGTTGG
2	167334089	167334209	SCN7A	121	CTTTAAGTCTTCTTCTTCATGGTCTTCATTATGTGTTTTAGCAATATGCTGTTTTATAAGTTCAAAAGACTCTTTAGTGAAGGGAACAAGGCCCTTAGGTTCTGGTGAAGCCAACATTTC
2	178095467	178095587	NFE2L2	121	ATAGTACAAAAAAACTAGCTCAGAAAAGGTCAAATCCTCCTAAATCTAGTTTTTCTTAACATCTGGCTTCTTACTTTTGGGAACAAGGAAAACATTGCCATCTCTTGTTTGCTGCAGGGA
2	178095587	178095707	NFE2L2	121	GTATTCACTAGGAGAATAAGGTTTTCCATCTTCATCACGTAGCATGCTGAAAACTTCGAGATATAAGGTGCTGAGTTGTTTTTTCAGTAGGTGAAGGCTTTTGTCATTTTCTCCTTTTTC
2	178095715	178095834	NFE2L2	120	ATTTTTCTTTTTCATCTTTCAAATGATCTAAATCTTGCTCTAGTTCTACTATATTTTCCAGTTTTCTTTTTCTGCAATTCTGAGCAGCCACTTTATTCTTACCCCTCCTACGTATATCC
2	178095834	178095954	NFE2L2	121	CGAATTAATGCAAGTTGAGCTTCATTGAACTGCTCTTTGGACATCATTTCGTTGAAGTCAACAACAGGGAGGTTAATGATTTTTTCTACAGGGAATGGGATATGGAGAGCTTTTGCCCTA
2	178095954	178096074	NFE2L2	121	AGTTCATCTCTTGTGAGATGAGCCTCCAAGCGGCTTGAATGTTTGTCTTTTGTGAATGGGGTTTTCCGATGACCAGGACTTACAGGCAATTCTTTCTCTGGTGTGTTCTCACATTGGGCA
2	178096074	178096194	NFE2L2	121	TCATGCACGTGAGTGCTCTGCCCCTGAGATGGTGACAAGGGTTGTACCATATCCCCAGAAGAATGTACTGGTGTTTTAGGACCATTCTGTTTGACACTTCCAGGGGCACTATCTAGCTCT
2	178096194	178096314	NFE2L2	121	TCCACTTCAGAATCACTGAGGCCAAGTAGTGTGTCTCCATAGCTGGAAGATTCCACTGAGTGTTCTGGTGATGCCACACTGGGACTTGTGTTTAGTGAAATGCCGGAGTCAGAATCATTG
2	178096314	178096434	NFE2L2	121	AATTCTGCTGTGCTTTCAGGGTGGTTTTGGTTGAAAGCTTTGCAAAGTGATAGATCAGAAACATCAATGGGCCCATTTAGAAGTTCAGAGAGTGAATGGCTTAAAGTAGCAGGTGAGGGC
2	178096434	178096554	NFE2L2	121	ATGCTGTTGCTGATACTGGGCTCAGCTATGAAAGCAGAATAAAATTCATCACCAAAATCTGTGTTGACTGTGGCATCTGAATTTAATGAGTTCACTGTCAACTGGTTGGGGTCTTCTGTG
2	178096554	178096674	NFE2L2	121	GAGAGGATGCTGCTGAAGGAATCCTCAAAAGCATTAAGAAAATGTGGACTACAGTTACCTACTTCTTTTTCCATTGAGGGTATAGATGAGTAAAAATGATAATTGTCAACTTCTGTCAGT
2	178096674	178096794	NFE2L2	121	TTGGCTTCTGGACTTGGAACCATGGTAGTCTCAACCAGCTTGTCATTTTCAATATTAAGACACTGCATGAGAAGGAAGTTTATACTATATAAATCAAAGTTAATCCATGATAATACGTGA
2	178097095	178097215	NFE2L2	121	AGTATTACATTCTATTTTAGTTACCTGTAACTCAGGAATGGATAATAGCTCCTCCCAAACTTGCTCAATGTCCTGTTGCATACCGTCTAAATCAACAGGGGCTACCTGAGCAACAGAAGT
2	178097215	178097335	NFE2L2	121	TTCAGGTGACTGAGCCTGATTAGTAGCAATGAAGACTGGGCTCTCGATGTGACCGGGAATATCAGGAACAAGTGACTGAAACGTAGCCGAAGAAACCTAAAATTGATAAGGCATTGATTT
2	178097962	178098082	NFE2L2	121	TATTTTATACCTCACCTCATTGTCATCTACAAACGGGAATGTCTGCGCCAAAAGCTGCATGCAGTCATCAAAGTACAAAGCATCTGATTTGGGAATGTGGGCAACCTGATAAAAGGGAAT
2	178098685	178098805	NFE2L2	121	tttccTTAAACCTGCCATAACTTTCCCAAGAACTGAGTACTCTGTACCTGGGAGTAGTTGGCAGATCCACTGGTTTCTGACTGGATGTGCTGGGCTGGCTGAATTGGGAGAAATTCACCT
2	178098805	178098925	NFE2L2	121	GTCTCTTCATCTAGTTGTAACTGAGCGAAAAAGGCTTTCTCTTGCTCCTTTTGGAGTTGTTCTTGTCTTTCCTTTTCAAGTTTTTTCTGTTTTTCCAGCTCATACTCTTTCCGTCGCTGA
2	178098925	178099045	NFE2L2	121	CTGAAGTCAAATACTTCTCGACTTACTCCAAGATCTATATCTTGCCTCCAAAGTATGTCAATCAAATCCATGTCCTATGTTTAAGACAAAAAAAGGAAGGAGAGAGCTCATGTTTTTTAA
2	178128073	178128193	NFE2L2	121	AAAATTACTAACAGACTAAAAGCAACAGAAATTCTAATCTACACTCGCAACTCTTACCCTTGACAGCACAGAAGAGAATATCCCGTCTTACACATTTTGGAATTGCAATTCTGAAACGCT
2	178128193	178128313	NFE2L2	121	AAATCCAAAGACAAAGCCGCTCTGGGGAAAATAGCAATTGCGCAACAGATCAACAGCTCCAACCTGTCCCTTGGCCCTGGCGCGGCGAGGTTTGCACGCTATAAAGCAGGAAAGGGCCAA
2	178128313	178128433	NFE2L2	121	CCGAGGGCTGCTGTGACGGCCAACCGAGCGCTGTCACGGAAGCCAAGGCCACGCGCGCGGTGAGCGCCACCAGGGGGCACCGCGTCCGAACTAGAAGCCCCGGGTGCCGCCGACTCCGGC
2	178128433	178128553	NFE2L2	121	CTCAGAGTCCACTGCCCTCGCCCGCACTTTCCCGCGGCGTTACGAGGGGCCAACTCCGGGTGCCCGAGCCCGAACCCCTCCCCGGCCGAGAAAGTGCGCGGGGCCCGGCTCAGCCGCCAC
2	178128553	178128673	NFE2L2	121	ACGTCGGGGCTTCTGAGCCCGCTGGGCACTTAAGGCGCTCCTCCCTCGTCCCGGGGCTGGGCTTTCAAGAGAGCTCAAGGCTGCCAGAGAGTGATCCGAGAGATGGATGACTTCGCAAAG
2	178129222	178129342	NFE2L2	121	CGGCACCACCGCAGGGCCCAGAGGGCCGAGGCAGCACCTGCTGGGACGGGAGTCCCGGCGGCGGCAGCTCCAAGTCCATCATGATGAGCTGTGGACCGTGTGTTGGGGCTCCCCGACGGC
2	209113058	209113178	IDH1	121	CATGCAAAATCACATTATTGCCAACATGACTTACTTGATCCCCATAAGCATGACGACCTATGATGATAGGTTTTACCCATCCACTCACAAGCCGGGGGATATTTTTGCAGATAATGGCTT
2	209113178	209113220	IDH1	43	CTCTGAAGACCGTGCCACCCAGAATATTTCGTATGGTGCCAT
3	10183725	10183761	VHL	37	GGTGAACTCGCGCGAGCCCTCCCAGGTCATCTTCTG
3	10183761	10183881	VHL	121	CAATCGCAGTCCGCGCGTCGTGCTGCCCGTATGGCTCAACTTCGACGGCGAGCCGCAGCCCTACCCAACGCTGCCGCCTGGCACGGGCCGCCGCATCCACAGCTACCGAGGTACGGGCCC
3	10188148	10188258	VHL	111	tgcccagccACCGGTGTGGCTCTTTAACAACCTTTGCTTGTCCCGATAGGTCACCTTTGGCTCTTCAGAGATGCAGGGACACACGATGGGCTTCTGGTTAACCAAACTGA
3	10188258	10188347	VHL	90	ATTATTTGTGCCATCTCTCAATGTTGACGGACAGCCTATTTTTGCCAATATCACACTGCCAGGTACTGACGTTTTACTTTTTAAAAAGA
3	10191460	10191573	VHL	114	GCCCTTCCAGTGTATACTCTGAAAGAGCGATGCCTCCAGGTTGTCCGGAGCCTAGTCAAGCCTGAGAATTACAGGAGACTGGACATCGTCAGGTCGCTCTACGAAGATCTGGA
3	37067180	37067220	MLH1	41	AAGTCTGACCTCGTCTTCTACTTCTGGAAGTAGTGATAAG
3	37067220	37067300	MLH1	81	GTCTATGCCCACCAGATGGTTCGTACAGATTCCCGGGAACAGAAGCTTGATGCATTTCTGCAGCCTCTGAGCAAACCCCT
3	41265505	41265625	CTNNB1	121	TTTTAGGGTATTTGAAGTATACCATACAACTGTTTTGAAAATCCAGCGTGGACAATGGCTACTCAAGGTTTGTGTCATTAAATCTTTAGTTACTGAATTGGGGCTCTGCTTCGTTGCCAT
3	41266010	41266130	CTNNB1	121	TTATAGCTGATTTGATGGAGTTGGACATGGCCATGGAACCAGACAGAAAAGCGGCTGTTAGTCACTGGCAGCAACAGTCTTACCTGGACTCTGGAATCCATTCTGGTGCCACTACCACAG
3	41266130	41266250	CTNNB1	121	CTCCTTCTCTGAGTGGTAAAGGCAATCCTGAGGAAGAGGATGTGGATACCTCCCAAGTCCTGTATGAGTGGGAACAGGGATTTTCTCAGTCCTTCACTCAAGAACAAGTAGCTGGTAAGA
3	41266391	41266511	CTNNB1	121	ACTTAGGTAAATGCTGAACTGTGGATAGTGAGTGTTGAATTAACCTTTTCCAGATATTGATGGACAGTATGCAATGACTCGAGCTCAGAGGGTACGAGCTGCTATGTTCCCTGAGACATT
3	41266511	41266631	CTNNB1	121	AGATGAGGGCATGCAGATCCCATCTACACAGTTTGATGCTGCTCATCCCACTAATGTCCAGCGTTTGGCTGAACCATCACAGATGCTGAAACATGCAGTTGTAAACTTGATTAACTATCA
3	41266631	41266751	CTNNB1	121	AGATGATGCAGAACTTGCCACACGTGCAATCCCTGAACTGACAAAACTGCTAAATGACGAGGACCAGGTAAGCAATGACATAGCTAGCTTTTTAGTCTGCTTTGAAGTAAATGCTCAAGG
3	41266824	41266944	CTNNB1	121	GTGGTGGTTAATAAGGCTGCAGTTATGGTCCATCAGCTTTCTAAAAAGGAAGCTTCCAGACACGCTATCATGCGTTCTCCTCAGATGGTGTCTGCTATTGTACGTACCATGCAGAATACA
3	41266944	41267064	CTNNB1	121	AATGATGTAGAAACAGCTCGTTGTACCGCTGGGACCTTGCATAACCTTTCCCATCATCGTGAGGGCTTACTGGCCATCTTTAAGTCTGGAGGCATTCCTGCCCTGGTGAAAATGCTTGGG
3	41267131	41267251	CTNNB1	121	GCTTTTTTCTTCTTCCCAGTTCACCAGTGGATTCTGTGTTGTTTTATGCCATTACAACTCTCCACAACCTTTTATTACATCAAGAAGGAGCTAAAATGGCAGTGCGTTTAGCTGGTGGGC
3	41267251	41267371	CTNNB1	121	TGCAGAAAATGGTTGCCTTGCTCAACAAAACAAATGTTAAATTCTTGGCTATTACGACAGACTGCCTTCAAATTTTAGCTTATGGCAACCAAGAAAGCAAGGTAAGAGAATTATTCTTTA
3	41268650	41268770	CTNNB1	121	GTGATCAAGATTCCTTGACTAACAAGATATATATATATATCTTTCTAGCTCATCATACTGGCTAGTGGTGGACCCCAAGCTTTAGTAAATATAATGAGGACCTATACTTACGAAAAACTA
3	41268770	41268890	CTNNB1	121	CTGTGGACCACAAGCAGAGTGCTGAAGGTGCTATCTGTCTGCTCTAGTAATAAGCCGGCTATTGTAGAAGCTGGTAAGTATATGTATCTATTCTGAGTCTTGTGTATAGCATCTGCAGTT
3	41274823	41274943	CTNNB1	121	TTTTCTAGGTGGAATGCAAGCTTTAGGACTTCACCTGACAGATCCAAGTCAACGTCTTGTTCAGAACTGTCTTTGGACTCTCAGGAATCTTTCAGATGCTGCAACTAAACAGGTAAATTC
3	41275009	41275129	CTNNB1	121	ATCTCCATAGGAAGGGATGGAAGGTCTCCTTGGGACTCTTGTTCAGCTTCTGGGTTCAGATGATATAAATGTGGTCACCTGTGCAGCTGGAATTCTTTCTAACCTCACTTGCAATAATTA
3	41275129	41275249	CTNNB1	121	TAAGAACAAGATGATGGTCTGCCAAGTGGGTGGTATAGAGGCTCTTGTGCGTACTGTCCTTCGGGCTGGTGACAGGGAAGACATCACTGAGCCTGCCATCTGTGCTCTTCGTCATCTGAC
3	41275249	41275369	CTNNB1	121	CAGCCGACACCAAGAAGCAGAGATGGCCCAGAATGCAGTTCGCCTTCACTATGGACTACCAGTTGTGGTTAAGCTCTTACACCCACCATCCCACTGGCCTCTGATAAAGGTAAATTGTCA
3	41275589	41275709	CTNNB1	121	TTTGTTGAGTTGTATGCCAGTTCTTCCTTCTGTTTTTCAGGCTACTGTTGGATTGATTCGAAATCTTGCCCTTTGTCCCGCAAATCATGCACCTTTGCGTGAGCAGGGTGCCATTCCACG
3	41275709	41275829	CTNNB1	121	ACTAGTTCAGTTGCTTGTTCGTGCACATCAGGATACCCAGCGCCGTACGTCCATGGGTGGGACACAGCAGCAATTTGTGGTAGGTAAATTCTTACAGTGATACCTGGCTATCTAAAAGGA
3	41277154	41277274	CTNNB1	121	TTGTTCCTCAAACTTTACAGAGGAGAATGCCCTGTTTGTTAACCATGTTTCTTTTGGCAGGAGGGGGTCCGCATGGAAGAAATAGTTGAAGGTTGTACCGGAGCCCTTCACATCCTAGCT
3	41277274	41277394	CTNNB1	121	CGGGATGTTCACAACCGAATTGTTATCAGAGGACTAAATACCATTCCATTGTTTGTGCAGGTATGTTTTAAGTGAAGTGTTCTAGGTTTTATGTCCATAAAATTTCCAGATTGTAATgac
3	41277795	41277915	CTNNB1	121	TTAGCTTTAGATTTAATTAGGTTTTGTTTGTGTTTTCTCCTTAGCTGCTTTATTCTCCCATTGAAAACATCCAAAGAGTAGCTGCAGGGGTCCTCTGTGAACTTGCTCAGGACAAGGAAG
3	41277915	41278035	CTNNB1	121	CTGCAGAAGCTATTGAAGCTGAGGGAGCCACAGCTCCTCTGACAGAGTTACTTCACTCTAGGAATGAAGGTGTGGGTAAGTAAAAAGGAACCAAAGCCTTTAGCAGATGTGTACATTGAA
3	41278019	41278139	CTNNB1	121	AGATGTGTACATTGAAGTCTCAGTTTTTCCTCAAGGGCCTTTTTCTCCTTGTCTCTTAGCGACATATGCAGCTGCTGTTTTGTTCCGAATGTCTGAGGACAAGCCACAAGATTACAAGAA
3	41278139	41278259	CTNNB1	121	ACGGCTTTCAGTTGAGCTGACCAGCTCTCTCTTCAGAACAGAGCCAATGGCTTGGAATGAGGTAGGGAAATGTGAGCAGTTATTTATCTGGTAGTTTCCTAGAGCAGGTATGGCAGCTTG
3	41279476	41279596	CTNNB1	121	TTCTTCCTTGCTTTGTGCATGTTTATCTAGACTGCTGATCTTGGACTTGATATTGGTGCCCAGGGAGAACCCCTTGGATATCGCCAGGATGGTATGTGTCTCATATTTCTCGATTAACTC
3	41280608	41280728	CTNNB1	121	ACCCTGACTCTTCTAGATCCTAGCTATCGTTCTTTTCACTCTGGTGGATATGGCCAGGATGCCTTGGGTATGGACCCCATGATGGAACATGAGATGGGTGGCCACCACCCTGGTGCTGAC
3	41280728	41280848	CTNNB1	121	TATCCAGTTGATGGGCTGCCAGATCTGGGGCATGCCCAGGACCTCATGGATGGGCTGCCTCCAGGTGACAGCAATCAGCTGGCCTGGTTTGATACTGACCTGTAAATCATCCTTTAGGTA
3	47058543	47058663	SETD2	121	TCTTACCTGACCACCCATCCTCCCACCCTGGCCCAACAGTCACTCTAATTCAGTGTCCTCTTTGGGTTTGTAAACAGCCCCAAACTTCTGCATGTACTTCTTAATGTACTCCTTGGTTTT
3	47058663	47058783	SETD2	121	GTGTTTCACATTCTCATTGCACTCCAGGTCCTCAGGATTCTTACAGTACTTCAGCTCCTTATTCATAACACCGTGAGTCAGCTGTCCAGGGCACAGGAAGAGAGACCACAGCCACCAATC
3	47059118	47059238	SETD2	121	GGGGAGTACCTTGCGAGCCAGATGTTTAAAGTCTTCAGTTGTGGTAATTCTTCCCACTTTGCAGTCAGGTTTCCGGTAAGGGTTCAGGCACTGGACGATGAACTGGGACATCTGCAGGCA
3	47061230	47061350	SETD2	121	TATATCCACCAAACCTTACCTCTTTTCTGAATACTTCTTTGCTTTTCTTTGCTAGTTCACTGGAGGTGTCTGCTTCTGCTGTCTTGGGCTTTTTCGAGGCCTAAAAATGGAGGAGAAAAC
3	47079151	47079271	SETD2	121	TCACCTTCATGGGGTTTTCATCATATGTTGGAGTTCCCAGGTCCATCTCAGCTTCATGCTCAAGGCTGGCATCATCTCCTGGGCTTTCCCAAGTAGGAGGATCCCACTGAGTCTGCCTAG
3	47084000	47084120	SETD2	121	CTTTGATTAAGTAAAAGCAGACATGGGAACGCCCATACAGCTCCTCTTACCTTGTGATCACATGGTAGTAATAAATCTTCCCTTCTGGATCTCGAGCTGTCTTCCAGTTGGGAGGTAAGA
3	47084120	47084240	SETD2	121	CAATGGTTTTTGGTTTGGGAGGAGAGGGGGGCGGCAGATCCAAGAGATTATTTGTCACAACCATTTCAGACTACAAAGAAAACACACACATTTTTGATCAGTGATCTCTCTCTTAATCTG
3	47087923	47088043	SETD2	121	TCCAAAGACAAAGTAGACAGCCAATGAGTTTTAACAACTGAAACATTTCTTACTGGCTGCAAGGGCTGAGGCTGCCCTGGTGCAACTATTGTAGTCACTGCTGCGGCTGGCTGTACCACC
3	47088043	47088163	SETD2	121	ACTCCTTGTGGATGAGCTGTGAAAATCTGTTGCCCCTGGATATACTGAAGACTTGGCTGGGCATAACTCTAAAAGATAAAATGAAGAAATCAATAATTTAAGCTTTTGTCACTTTAATAA
3	47098285	47098405	SETD2	121	AAAGAAAAGTTTCAGAATTAGTTACCTGTACAATTGGTGGAGTTGTCTGTGAATAAGGTGATGTCACACCATAGACTGTTGGACATGTCTGTCCTTGATAATATATGGTTGCTTGAGACT
3	47098405	47098525	SETD2	121	GTGCAGGAGAGTACTGCTGCTGTACACTGACAGACTGTTGGTTTGAATCCCAAACACTATAATTCTGTCCCTGAACTGGGCCGGGGGCCGGCACTGGCAAGACAGCAACGCTGGAGTCTT
3	47098525	47098645	SETD2	121	GGTGTACTACACCATCACTCTGGGCCACATACTGGGAACTGGAAACTTCCACAGGAGCTGCCACATGTGGCACCACTGGTACTGGTGGAGGGGCAGAAAGGGGTTCTGTAGAATGTCCCA
3	47098645	47098765	SETD2	121	CCAAGGGCTGAGCATGATCATAAGGAGCAGGAGAACACACTGGGTCCATGCTGGGTGTGGGCAGGAGCACCTTTCCAGCATTAGGGTTGCTGGGATCCACATAGGCCTGCATGGGATAAC
3	47098765	47098885	SETD2	121	CTGGTGGGTAACCAGCAAAGGGATGATGCGGGGCATTATAACCAAGAGAGTCATAGGGCAGTGGTGATGTCATTCCCAGGTTCTGCATCTGTTGCTGTTGTTTCTGAGCCTCCCGTTGAG
3	47098885	47099005	SETD2	121	CCACCTCTTGCTCAAACAACTTCCGGCGTTCCTCTGTAGAAAGTTTATTGCGGTCTTTAATTCGTACTTTCTTTTTAGAAGTTGGTGTATCATATCTAGAAAGAAAATAAGGACCACAAA
3	47103624	47103744	SETD2	121	aacaaaaaAACTCACACAGGCCACTTACCTGTCATCTGGCCTTTTTGTTCCCCGCTCATAGGCAGAAGAGGGTGGTGAGAGGGAGCTTCTTCGTTTCCTTTTCTCTTTATTTTGAGTTTG
3	47103744	47103864	SETD2	121	CTTGTCTGGGTCTCTCTCTCTTGACCTATTAGGAGTCTTCGGGGCAGGTGTTTGATCTCTGAAGCCAACAGCATCCCTTCCTCGTTCAGTTGCTAAGGGAAAAGGGTGGTTTGTTTGTTT
3	47108524	47108644	SETD2	121	AAAGCCATCAACACAGAGTATCTCTGAATACCTACTTGTGTTTTCCTTTTCAGTTTGACTTTTCTTTGGAATTCGATATACCTCCTGCAAAAAATAAACCAGAGGGAGGGTTATTAGTGA
3	47122251	47122371	SETD2	121	AGTGGTCCTGTGTATATAGGTATAGAAAAAGTAGCTCACTTAATCCTTTCTCGCCAGGAGTAGGGATTTTCCCGGAACGACATCCATTGTCGGCAATGGACGCACCAAAATAACGCCGGC
3	47122371	47122491	SETD2	121	GCCAGTGAGTTAACCACCTCTGTCCTCTTTTCACCTATTATATTTTTCATGCATCATCCAACTTCCCAACCATCTTCCTGTTTCTTCACAGAATGCACGCTAGGTTCTCGTTTTTCTTCA
3	47122491	47122611	SETD2	121	GCACGAAGTTGGAAATGGAGTTGAGAAAAGGAGACACATGGTCAGCTGGTGATGTTAACAAGCTCCTTGCTGCCCTGAGAAGCTAGATGGAAATGGTTCAAGTTACAAGGGGGATCATCA
3	47125180	47125300	SETD2	121	GTTGAAATGAACAAAAGATGCTTCCTTACCTTTAGGTCTTTCCAACTGTCCAGGAGTTTGGTGGCCAAATCACTTATATCCACTGTTTTATCTGGCTGTTCTTGGCTCCTTTCACTCTCC
3	47125300	47125420	SETD2	121	ACATCAGACACACCCTCCTCTTCATCTTGGGATGGTGTTTCTTCATTAATAGGTTCTTCTAGTTTTGTGCCGTTGCTCTCTTTGGGCTCTATTTCAGCGTCAGCTTCTGGTTCAGATGTA
3	47125420	47125540	SETD2	121	GGTAGCTTACTAGCTTCTATGTTGGTTTCACTATCAACTTTGCATTCAGGCAGCTGTTGTGGGAGTAGCTGTTGTGACTGCAATTCTTCCTCTTCCTCTACAGGGACATTTTCTAATTGA
3	47125540	47125660	SETD2	121	TCAAGATCCTCTTTGCCATCCTTGCCTTCTAGCTCACTGGTTGCATCAGAGATTGCACTGTCCATGCTATTTTCACTTATAATTTTCAGTCTGCGAAACATTAGTTTCTTGGGAGTGTCT
3	47125660	47125780	SETD2	121	GTGTCAGCTTCTGTGCTCAGCTTGGTGGAAGGATCAGGTGTGTTGAGTGGTGTATGAGCACGCGATGTATTCTCACTAGAATACCCATCTCCTTCACTCAACGGAGGGACAGCAGTCTTA
3	47125780	47125900	SETD2	121	GTCTGAGACCAGCGTTGAATAATTGGAAGTACTTTGCTTTCCTCCAACATATTTTTAGTAGGAATGGGCAAGTGTTCCAAAGTCTTTATAATCTGATTAAACATAAAAAAAAATTACATC
3	47127624	47127744	SETD2	121	CACAACCGAGGCAATCAATATAACAGTTTTAAGAAACAAGCAAGCTAAATGTGAACTGACCTCTTCCTGAAGCTTCTGGTTACTTTCCCGGCCGTCACCTAGCTCTGCCATCCAGATCCA
3	47127744	47127864	SETD2	121	CAACAAAGACAGCCCATGACGTTCCAGAAAGGACTTCAGGCAGGACTGTGAGTGTGTGTTCTTTCATGGGGGAAGGGAGACACGATGCAGAGCATTGGGAGGCAATATCAGAATATTACA
3	47129548	47129668	SETD2	121	TCATTCATTCCCACCACAAAACCAGAAATAAAAAACAAACATTAAAGTGTTCACCTGTATGAGTTCCAGACAGGTAAGTTTCTGCTCCAAAGTTTCAATTCTAACCATTAGCCGGGATAA
3	47129668	47129788	SETD2	121	GCTGAGCACCTGGTTTTTATCAGAGAGACCCTCACCATTTTCCATCAGAGCTTCTAGCTCTCCATCCACCTACCACAGCAAATAAAAATACCTTTTTATAAAACAACAACAACAAAAAAA
3	47139387	47139507	SETD2	121	GCCACCTCGCTTTTTAAATTTTTTATTGTGAAAGTTGAAAGAAAAATGCAAACTTACTGAATCCTTCTTACGAGATCGTTCCTTCTTCATTTTCCCTCCTGCTGCTCTGATGCTGACTCT
3	47139507	47139627	SETD2	121	GTTTTCTCCTCCCAGGTAACCCCGGCAATTGGCTGATCCGCAGAAACATTTCTGGGCTTCTTTTCTGTTCAAAGAGCATAGGAAAGAAGTCAGCTATGTGGAAGTAAACCATACAAAACT
3	47142936	47143056	SETD2	121	ACAATACTTACCCATATCTCTGGAACTGATAGTCAAACGTTAACTCTGAGCCTGAAGGAACCAGTTTGGTGGTAAAAAACCCAACCCTCAGTTGTCCGTTCACAGTCCACTGAGATGATG
3	47144814	47144934	SETD2	121	TCTAAATCCACCTCAACTTACTTTTTGGGTTTCACAATTTGGTTCACAGCTGTGATTCATGAAACGAGAGCAATTTCCTTTTTGAGTGGCATCTATTATCTGGGAGAAGAGGATCATTTA
3	47147428	47147548	SETD2	121	AATGGCTCCTTCAAACCTAACAGATCTGTTTCAAGGCAAACATATCCAAGCTGCTTACCTCATCATTCTTCAGGGCCATGAAATAGTAATGGATGTTTTTGTTTCGTGCATACTCCTTCA
3	47147548	47147668	SETD2	121	CTCGAGCTTTAAACTCTTTATGATCGAGTACCTCTCCACAATATTCTAGGACAAAGGTGTTCCTGCAAACCAAAAGGAAAAAAATAGCACTTCCTACCTAGGAGCAGTAGGGAAAACATA
3	47155313	47155432	SETD2	120	gtgagaccttgtctcaaaaaaGGAAGTGAAAGGTAATTAAAAAAGAACTTACGAAGGAAGGTCTTTGGCAGCTCTCAAGCCCCAGCCTTTCTTTTCTGTGAGTATGACTTCCACATCTG
3	47155432	47155552	SETD2	121	CATGCTGTTTTCTCTGAAACCGTCTATTGGAACAATAATCCCCATTTGGACACCGAGAAGAACTGAAATGAGAAAAGGAGGAAATTTAATTCTTTAAAGCAGCAAAAGAACCAAAGTAAC
3	47158058	47158178	SETD2	121	TAGAGACATTTAATAGAAGTGTTGAGCAAAAGCCGAGTATTCTAATTTACTTACCATTCAATCATGAGAAGACGATTAAGACAATCTTCCCCACATGCTATTTCACCTTGAGCTCTTTCA
3	47158178	47158298	SETD2	121	TCTTTAGAAAGAGGTGTACACTCACACTGCATTCGCTTAATATCTCGATGAGATTTATTCTTCTTTCTATTGGGTAAAATTTCATAAAAACTGATTAAATAAATTTCCTGGTAAAGATAT
3	47161602	47161722	SETD2	121	TGTTTAAAGGCTTTTTCTAACAACAAAAAAAGAGTTAAAATTTGTCAAACAAGTATTAATTAGACTTACCTTTCTGTTAAATAAACATTTTCTTCAATAAGATCAAAGTAACATGGCATT
3	47161722	47161842	SETD2	121	TTCCCTTGCTTGGCACATTCCTTCCATCGCTGTGGGTCCCTGAAGTCATCCATGACACAGGAGGGCCCAACCAGTGCTGAACCTGGGGGCACTGATGTCTCTCCCTGCTCTACCTCCACT
3	47161842	47161962	SETD2	121	CTAACTTTCTTTCTGTCCTGAAGCTCACCATCACTTTCAGAATCACTCTCTATTTCCTGCCTCCTTTTTTTAAGAGGCCCTCTATCTTTGATATCATTTTTTTCTAAGTTTTTTGAAAAA
3	47161962	47162082	SETD2	121	TCTTTCTTTTCATTCACAGCTAAAGTGTCCTTAATGGAATTGCTGCTTATTTCAGGTGCTTGCACTGACCCCTTGTCTTTCTGAAGGGATAGAAGAAATTTATCGGACTGGTCTGAAAAA
3	47162082	47162202	SETD2	121	TGGGATCCATCCTGTTGATCCCAATTCTCCTCTTCTTCACGATCATCTGTTAGGGAATCTGGTACTTGTCCTTGAGTTCGATCATACACAACCCCAGTTCCAGGAGGTCTACCTGATCTT
3	47162202	47162322	SETD2	121	GGATCCCAGTAACCATTGCCTTGCCAGTAATCACGTGTCCCACCATACTGTTCTGCATTTTGCTGATACTTGTGTCCACCACAAGCTCCATAGCTACTGTCAGGTTGCTGATACGTGGTA
3	47162322	47162442	SETD2	121	GAAGGCTTTTCTTGAGAGAAGTCCCAACCTAAGTTTCTGAGCTCTTCTGATGAGTGCAAGCCATCCACATGTGGTATCTCACAAGAGGAAGAAAAACTCAATTCTGTTTTTCCCAGTCTA
3	47162442	47162562	SETD2	121	CTATCTGGCCTGTTTTGGAAAGTGGTCTGTTGCCAAGACTTATTTGGGACATCTTCAAAATCAGAAGAATAAATTGGCAGCTCTTCTTGCTGCCTAGAAGGTATTTTGGCTTTCACGGTT
3	47162562	47162682	SETD2	121	TCCTCTGAATTTGGGTGACCCAGAGGGTCAGATTTCACATCTGTATGACTTGTACTATCAACCCCATCACTCTGAGGATGAGAAAGTTCAGGCAGGCGATTATCTATTTGTTTTCTACTG
3	47162682	47162802	SETD2	121	GACTGTGTAAAAGAAATTTCCGGATTCTTCTCTGTTCCTTTATGAAGGAAAAACTTATCAGTTTGAGGACAGGCTTTACTTGCTATACTTTCAAATTTTTCCTCATACAAATGTCTCCTT
3	47162802	47162922	SETD2	121	GACTCCAATCTCTCATCTTCCCAATGGTCAGAATAGTGTCTATAACTTTGACTGCTCCGAGAAGAACAAGGACTTGTTTCTTCCATGGGCAAAGTAGAATTCTTTGGCACAACCACAACA
3	47162922	47163042	SETD2	121	GACTGGAGACGGTTTCTTGGAATACTGCTATCATCCGAATCTGTATCTTCTGAATCACTTTCATCATTTGAACTTTCAGAAGAGCCAGAATAATCTTCATGAACTGTAGACACAATTTCT
3	47163042	47163162	SETD2	121	GGGGCATGACCACTACTGTCACACTTTAATGCATAAGTTACACCATCACTGTCTTCCATGGTTAAATTCAAATCACAAGAAGAAAATACAACTTCTGAGTCATCAGAAGTATGCACATGT
3	47163162	47163282	SETD2	121	CCTCCTTCTCCTCTTTCATCTAAAGAGATTTCTGGTCTTCCTCTTCTTTCAGGCAATATGGAATTCCCTTCTTCTTGAGCCTCTTGCAAACATTTCCCAGATAACCCATTATTACGCCTG
3	47163282	47163402	SETD2	121	TTCTCCCTGGAAGCAAATCCCTTTCCTGAATCAGGAAGGTCACTACCTACTTCTACTATTGTTTCTTTCCCTGCATGCTTTAAAAACTCTGAACTTTTTTTACTCTTTAGCACTGCATCC
3	47163402	47163522	SETD2	121	AGAACTGGAGATGTGTTCTCTCCGCATTTCAAGAGAGTTAGACTGTCCACCTTTATTCCTGGTGGAAGACTCTGAAGAGATGAAGCAATACCTGAACTCCCAATAGGTTGATATAAATCA
3	47163522	47163642	SETD2	121	TCAAAATGATTAACAGAAGCTGAACTAGTGCTACCGATGCTCTGCTTATATTCTTCACATGCAAATTTTGAGTGATCTGTCAAATTTCTACTATCACATATAACTGGTTTTGATTCCAAA
3	47163642	47163762	SETD2	121	TGCACATTCATAAAGCTATTTGAAGAAATCTTCATAACTGAAGGCTCAATATTTTCAGCTTCAGAGTTACACAAAGAAGGGTTGCTATCGTTCAAAGTACAGTATATGTCTGAATCTTTG
3	47163762	47163882	SETD2	121	GTTTTGCAGCAAGAAACCCTCGTATCAACTGGTTCTTTAACTACTGTTTTGGAATAATCCACAGTCATAACTGGCATAGACATGAGTTTATCTTGGTGTGGTGACACCAGAGGTTCTGTT
3	47163882	47164002	SETD2	121	TCTCTAAATGGGCTTTCTGACTTCTTATGCAGCATGCAGGTATCATCCAAGTCTTTTTCTTTGCACCTACTAATATTCTGAAATCCATTTGATGAAAGCATGCATGCTTTGACCAAAGGG
3	47164002	47164122	SETD2	121	GATAATTCCGATCCAGTCACACTATCATCAGAAGTCATTAAAACAGCATCAGTTTTAGAAGTGCAAAATGTTGCCAAATCAGATTCTGCCCCAGGAGATCCATTTATATTTAATTCTATG
3	47164122	47164242	SETD2	121	GGACAAAAACTTCTTAATTGATCATTCTTCACTTTAGATAAAGAGTCTAATTCCTTAATACTATCATGGCTATCATGTGTTATAAATTCGGACTTAAAAATAGGCAATTCATCTAGCTTT
3	47164242	47164362	SETD2	121	TTTAAAGTAGGTGAATCATTTAATCGATTTGATGGAGCTGGAGACCCAGCCTTTTCTCTTTCAGGATTTTTATTAATCATTCTTAATTCACTACCTTTTGAACAAGGTGTCTGTAAACTA
3	47164362	47164482	SETD2	121	AAAGAATGAGACTGTTTGATTTCTTCATTTAATTCTGTACAACAGAAAGAATTTTTAAATTTATCAGACTTGGGTATAGGTTTTGAAAGGGTAGATTTATAACGGGAAGCACTACTGTCA
3	47164482	47164602	SETD2	121	TGCTTAGAATATGATGACCCTCGTCGGAATCCCAGTTCATTAGGGGGAGAACAACATCTTTTAATTGCTTCATTTTCTGAAGTCCTTTTAGATTCTCTTTCTAGTTTTGAAGAATACTTG
3	47164602	47164722	SETD2	121	CCTCTTCTTTCCATCTCTAAGTAAGAGGTCTCAGTTTTACAGTCCCGATCAGATTTAGAATAGGATGATGTCCTTAGGTCTCTGTAAGAAGAGGAATGAGATGAGGTACGCCTTGAGTAT
3	47164722	47164842	SETD2	121	GTCTTCTTATACTCTTCTTCTGAGTCAGAACTCTCTCGTGCTCTGTTATCTGTGTATGGCCGAGAATAGCGCGTCCTCTCTCGATAAGGGGAGCTCCTATGGTAGCGACGATCAGAGTCA
3	47164842	47164962	SETD2	121	TAATAATGAGATCGTTCTGACCTGGAATAGGATAAATTAGTTCTAGAGCCTCTCTCAGACCTAGAGTGAGATCTGCTCCGCCGTCGCTCTCTTTCTGATCTACATCGGGAAGATACATAC
3	47164962	47165082	SETD2	121	CGAGTATCTCTTTCAAGTTTTGAATAGCTAAAATATTTATCATCTCTGTCTGTTTTAGATCGTGAAGGTTTCCCTAGATCCTCACTTTTTAAAGGTGCTGAGCTCTTTTTAAAATCTCTT
3	47165082	47165202	SETD2	121	TCCTTTTCAATGCTTGCTGAAAATTTTAAATCATGTGATCTTTGACTTGAAGAAGTCCGTACAGAATCTTCATCAGATTCTGAACCAAGAAAGATGCCTTCAGATTGTGAGGATTTCTTC
3	47165202	47165322	SETD2	121	TTAGAACCTGTTTTTTTACAGCTCAGACTAATCTTAGAACTATCTGGAATTTCTTCATCCTTCCCAATATGGGAATCTTCTTTTTTTGAGGAAATATCTGCTTGCTCATTCAATATTTGA
3	47165322	47165442	SETD2	121	GTTACGTGTTCTTCTAAACTATTAGATATAGTGTCCTGCTTAGTATCTGCTTCTAAAGATTCTGGTACAATTATAATTGGTGGTTCTTTCAGAGATCTAACTGCTACATCTACTGGTAAG
3	47165493	47165612	SETD2	120	GGCTCTGTTACTGGTGCTGGTGATGAGAGTGTTGTGGCTTGGGCAGGTGGAGGCGGTGGAGGCGGAGATGAGGGCGGTGAGTCTACAGTTGTTGATTCTGCTATCACTGCTGGTAATGG
3	47165612	47165732	SETD2	121	TGCTGCATGAGTAGGTGGAGATGCTACTGCTGTGGTAGTAGCCAGCAGTGGCCTGGATGTTACATGAAGCAGATGTTTCTTAAAATGAATTTTGCCCAATTCCACCCTTGACTTTGGTGG
3	47165732	47165852	SETD2	121	GGAAGATTCTTCTGCAGTAGATAAGGTATCACCAATTTCCATTTTCATTTTAGGAGTCGAGTCTACCTGAAGAGGTACAGCTGGAGGGTTTGGAGTATCACTTTGCTTTTCATTGCCAAG
3	47165852	47165972	SETD2	121	TGCAGTGAGAAACCTATTCTGCAAAGTTTTCTTTGTAAGGCTGAAGCTGAATGACACCTTCTGTCGTCCCTGTTCTTCCAAATTAACTTTTGTTTTGGTGCCTTTGGGCAAAAATCGACT
3	47165972	47166092	SETD2	121	AGAAGCAACACCTTTGAACATTGGTCCTTTGATGAAACCTGTTTTCTGCACATTTTCAATCTTTGCCTACAAATGAACAAAATAAGCAATTACTACTACAATAAATAGTTACTTTCAAAT
3	47168085	47168205	SETD2	121	TGTTTAGTGGTCCATCTCATAATCATTGAATGACTAGTTAAATTATACTTACCTCATTTTCTTCTTCTCTATTTCCATTCAGCCAAGAAAACATGCAAAAGAATAAAAAGAAATCATAAA
3	47205282	47205402	SETD2	121	CCGCCCTCGGCTGGGGATAAGGCGGCCGACAGCAGCGGGGGGCCGCGGAGCTGATACTTACTCAGGGGTCGGGTGCTCCGGGTCGTAGAAATCCCCCATCTTCGGAGGCGGCTGCGGCTG
3	47205405	47205524	SETD2	120	CTGCTTCATCGGGAGCGGCTGGAGACGGCGACGCGAGCCCCCTCCCCGCAGCAGGGCGACGCGGGGGAGGGGAGGGGAGGAGGCCGCAGGTCCGACCgcggcggcggcggcggcggcgg
3	178916609	178916729	PIK3CA	121	AACAATGCCTCCACGACCATCATCAGGTGAACTGTGGGGCATCCACTTGATGCCCCCAAGAATCCTAGTAGAATGTTTACTACCAAATGGAATGATAGTGACTTTAGAATGCCTCCGTGA
3	178916729	178916849	PIK3CA	121	GGCTACATTAATAACCATAAAGCATGAACTATTTAAAGAAGCAAGAAAATACCCCCTCCATCAACTTCTTCAAGATGAATCTTCTTACATTTTCGTAAGTGTTACTCAAGAAGCAGAAAG
3	178916849	178916969	PIK3CA	121	GGAAGAATTTTTTGATGAAACAAGACGACTTTGTGACCTTCGGCTTTTTCAACCCTTTTTAAAAGTAATTGAACCAGTAGGCAACCGTGAAGAAAAGATCCTCAATCGAGAAATTGGTAT
3	178917462	178917582	PIK3CA	121	GTAATTTTATTAAAGGTTTTGCTATCGGCATGCCAGTGTGTGAATTTGATATGGTTAAAGATCCAGAAGTACAGGACTTCCGAAGAAATATTCTGAACGTTTGTAAAGAAGCTGTGGATC
3	178917582	178917702	PIK3CA	121	TTAGGGACCTCAATTCACCTCATAGTAGAGCAATGTATGTCTATCCTCCAAATGTAGAATCTTCACCAGAATTGCCAAAGCACATATATAATAAATTAGATAAAGGTAAGAAAATGACTA
3	178919023	178919143	PIK3CA	121	CCCTTGAAAAATGAAAGAGAGATGGTGATTGCATCTAATGTTTTCCTGTTATAGGGCAAATAATAGTGGTGATCTGGGTAATAGTTTCTCCAAATAATGACAAGCAGAAGTATACTCTGA
3	178919143	178919263	PIK3CA	121	AAATCAACCATGACTGTGTACCAGAACAAGTAATTGCTGAAGCAATCAGGAAAAAAACTCGAAGTATGTTGCTATCCTCTGAACAACTAAAACTCTGTGTTTTAGAATATCAGGGCAAGT
3	178919263	178919383	PIK3CA	121	ATATTTTAAAAGTGTGTGGATGTGATGAATACTTCCTAGAAAAATATCCTCTGAGTCAGTATAAGGTGAGTAACAAGTTTCaaaatattaatttttaatttaaaaaGTAATCACATTGAG
3	178921274	178921394	PIK3CA	121	TTACTTTTAAAATGAAAAACCTTACAGGAAATGGCTCGCCCCCTTAATCTCTTACAGTATATAAGAAGCTGTATAATGCTTGGGAGGATGCCCAATTTGATGTTGATGGCTAAAGAAAGC
3	178921394	178921514	PIK3CA	121	CTTTATTCTCAACTGCCAATGGACTGTTTTACAATGCCATCTTATTCCAGACGCATTTCCACAGCTACACCATATATGAATGGAGAAACATCTACAAAATCCCTTTGGGTTATAAATAGT
3	178921514	178921634	PIK3CA	121	GCACTCAGAATAAAAATTCTTTGTGCAACCTACGTGAATGTAAATATTCGAGACATTGATAAGGTAAAGTCAAATGCTGATGCTTATTATTTTATAGAAATTATTTTAGATAACCTTTTT
3	178922273	178922393	PIK3CA	121	CTACTTTTTTCTTTTAGATCTATGTTCGAACAGGTATCTACCATGGAGGAGAACCCTTATGTGACAATGTGAACACTCAAAGAGTACCTTGTTCCAATCCCAGGTAAGGAAGTATATAGA
3	178927375	178927495	PIK3CA	121	TACATAGGTGGAATGAATGGCTGAATTATGATATATACATTCCTGATCTTCCTCGTGCTGCTCGACTTTGCCTTTCCATTTGCTCTGTTAAAGGCCGAAAGGGTGCTAAAGAGGTAAAGT
3	178927929	178928049	PIK3CA	121	GTTTTATAATTTAGACTAGTGAATATTTTTCTTTGTTTTTTAAGGAACACTGTCCATTGGCATGGGGAAATATAAACTTGTTTGATTACACAGACACTCTAGTATCTGGAAAAATGGCTT
3	178928049	178928169	PIK3CA	121	TGAATCTTTGGCCAGTACCTCATGGATTAGAAGATTTGCTGAACCCTATTGGTGTTACTGGATCAAATCCAAATAAAGTAAGGTTTTTATTGTCATAAATTAGATATTTTTTATGGCAGT
3	178928166	178928286	PIK3CA	121	AGTCAAACCTTCTCTCTTATGTATATATAATAGCTTTTCTTCCATCTCTTAGGAAACTCCATGCTTAGAGTTGGAGTTTGACTGGTTCAGCAGTGTGGTAAAGTTCCCAGATATGTCAGT
3	178928286	178928406	PIK3CA	121	GATTGAAGAGCATGCCAATTGGTCTGTATCCCGAGAAGCAGGATTTAGCTATTCCCACGCAGGACTGGTAAGGCAAATCACTGAGTTTATTAAGTATCAATTATAATCTGTGGATTTAGG
3	178935939	178936059	PIK3CA	121	ATCCAGAGGGGAAAAATATGACAAAGAAAGCTATATAAGATATTATTTTATTTTACAGAGTAACAGACTAGCTAGAGACAATGAATTAAGGGAAAATGACAAAGAACAGCTCAAAGCAAT
3	178936059	178936179	PIK3CA	121	TTCTACACGAGATCCTCTCTCTGAAATCACTGAGCAGGAGAAAGATTTTCTATGGAGTCACAGGTAAGTGCTAAAATGGAGATTCTCTGTTTCTTTTTCTTTATTACAGAAAAAATAACT
3	178936964	178937084	PIK3CA	121	TTTTGTTTCTCCCACACAGACACTATTGTGTAACTATCCCCGAAATTCTACCCAAATTGCTTCTGTCTGTTAAATGGAATTCTAGAGATGAAGTAGCCCAGGTAAATGTATGTTTGAGAT
3	178937320	178937440	PIK3CA	121	CCCCTTTAAATATGATTTATTGTCTTTCTCATACACAGATGTATTGCTTGGTAAAAGATTGGCCTCCAATCAAACCTGAACAGGCTATGGAACTTCTGGACTGTAATTACCCAGATCCTA
3	178937440	178937560	PIK3CA	121	TGGTTCGAGGTTTTGCTGTTCGGTGCTTGGAAAAATATTTAACAGATGACAAACTTTCTCAGTATTTAATTCAGCTAGTACAGGtaaaataatgtaaaatagtaaataatgtttaattac
3	178937728	178937848	PIK3CA	121	TCACCTAGGTCCTAAAATATGAACAATATTTGGATAACTTGCTTGTGAGATTTTTACTGAAGAAAGCATTGACTAATCAAAGGATTGGGCACTTTTTCTTTTGGCATTTAAAGTAAGTCT
3	178938739	178938859	PIK3CA	121	tatatatatttttaattttGCACGATTCTTTTAGATCTGAGATGCACAATAAAACAGTTAGCCAGAGGTTTGGCCTGCTTTTGGAGTCCTATTGTCGTGCATGTGGGATGTATTTGAAGC
3	178938859	178938979	PIK3CA	121	ACCTGAATAGGCAAGTCGAGGCAATGGAAAAGCTCATTAACTTAACTGACATTCTCAAACAGGAGAAGAAGGATGAAACACAAAAGGTGTGTGACTCTAGTTTGTGTTTGAGACTCTTTT
3	178941862	178941982	PIK3CA	121	AATCAGGTACAGATGAAGTTTTTAGTTGAGCAAATGAGGCGACCAGATTTCATGGATGCTCTACAGGGCTTTCTGTCTCCTCTAAACCCTGCTCATCAACTAGGAAACCTCAGGTACTTT
3	178942428	178942548	PIK3CA	121	ttCAGGGTAAAATAATAATAAAGCAAAGGTACCTAGTAAAGTTTTTAACTATTTTAAAGGCTTGAAGAGTGTCGAATTATGTCCTCTGCAAAAAGGCCACTGTGGTTGAATTGGGAGAAC
3	178942548	178942668	PIK3CA	121	CCAGACATCATGTCAGAGTTACTGTTTCAGAACAATGAGATCATCTTTAAAAATGGGGATGGTAAGGAAGAGTATTAATGAGCTTATGATGCATGAATTTAGCTATCTTTTTATACACAG
3	178943729	178943849	PIK3CA	121	ACATATTATTTGAATTTCAGATTTACGGCAAGATATGCTAACACTTCAAATTATTCGTATTATGGAAAATATCTGGCAAAATCAAGGTCTTGATCTTCGGTAGGTAACCAGTAAGGCAAC
3	178947025	178947145	PIK3CA	121	TCATTTAATTGTAAACGTGTTACTCCTCTTTCAGAATGTTACCTTATGGTTGTCTGTCAATCGGTGACTGTGTGGGACTTATTGAGGTGGTGCGAAATTCTCACACTATTATGCAAATTC
3	178947145	178947265	PIK3CA	121	AGTGCAAAGGCGGCTTGAAAGGTGCACTGCAGTTCAACAGCCACACACTACATCAGTGGCTCAAAGACAAGAACAAAGGAGAAATGTGAGTTGTATTATTCTTTCTTCCTATGTTAATCT
3	178947790	178947910	PIK3CA	121	GATATGATGCAGCCATTGACCTGTTTACACGTTCATGTGCTGGATACTGTGTAGCTACCTTCATTTTGGGAATTGGAGATCGTCACAATAGTAACATCATGGTGAAAGACGATGGACAAG
3	178947968	178948088	PIK3CA	121	ATCTGCATATATCAAACTATAACATAATTTCTTATTTTTGAAAGCTGTTTCATATAGATTTTGGACACTTTTTGGATCACAAGAAGAAAAAATTTGGTTATAAACGAGAACGTGTGCCAT
3	178948088	178948208	PIK3CA	121	TTGTTTTGACACAGGATTTCTTAATAGTGATTAGTAAAGGAGCCCAAGAATGCACAAAGACAAGAGAATTTGAGAGGTGAGCTCGAGCAATTAAAAACACAAAATAAAGAGTTCTGGCTG
3	178951836	178951956	PIK3CA	121	ACATCATTTGCTCCAAACTGACCAAACTGTTCTTATTACTTATAGGTTTCAGGAGATGTGTTACAAGGCTTATCTAGCTATTCGACAGCATGCCAATCTCTTCATAAATCTTTTCTCAAT
3	178951956	178952076	PIK3CA	121	GATGCTTGGCTCTGGAATGCCAGAACTACAATCTTTTGATGACATTGCATACATTCGAAAGACCCTAGCCTTAGATAAAACTGAGCAAGAGGCTTTGGAGTATTTCATGAAACAAATGAA
3	178952076	178952196	PIK3CA	121	TGATGCACATCATGGTGGCTGGACAACAAAAATGGATTGGATCTTCCACACAATTAAACAGCATGCATTGAACTGAAAAGATAACTGAGAAAATGAAAGCTCACTCTGGATTCCACACTG
3	181430105	181430224	SOX2	120	ggtcggcggccgccggcgggccgggcccgcgcACAGCGCCCGCATGTACAACATGATGGAGACGGAGCTGAAGCCGCCGGGCCCGCAGCAAACTTCGGGGGGCGGCGGCGGCAACTCCA
3	181430224	181430344	SOX2	121	CCGCGGCGGCGGCCGGCGGCAACCAGAAAAACAGCCCGGACCGCGTCAAGCGGCCCATGAATGCCTTCATGGTGTGGTCCCGCGGGCAGCGGCGCAAGATGGCCCAGGAGAACCCCAAGA
3	181430344	181430464	SOX2	121	TGCACAACTCGGAGATCAGCAAGCGCCTGGGCGCCGAGTGGAAACTTTTGTCGGAGACGGAGAAGCGGCCGTTCATCGACGAGGCTAAGCGGCTGCGAGCGCTGCACATGAAGGAGCACC
3	181430464	181430584	SOX2	121	CGGATTATAAATACCGGCCCCGGCGGAAAACCAAGACGCTCATGAAGAAGGATAAGTACACGCTGCCCGGCGGGCTGCTGGCCCCCGGCGGCAATAGCATGGCGAGCGGGGTCGGGGTGG
3	181430584	181430704	SOX2	121	GCGCCGGCCTGGGCGCGGGCGTGAACCAGCGCATGGACAGTTACGCGCACATGAACGGCTGGAGCAACGGCAGCTACAGCATGATGCAGGACCAGCTGGGCTACCCGCAGCACCCGGGCC
3	181430704	181430824	SOX2	121	TCAATGCGCACGGCGCAGCGCAGATGCAGCCCATGCACCGCTACGACGTGAGCGCCCTGCAGTACAACTCCATGACCAGCTCGCAGACCTACATGAACGGCTCGCCCACCTACAGCATGT
3	181430824	181430944	SOX2	121	CCTACTCGCAGCAGGGCACCCCTGGCATGGCTCTTGGCTCCATGGGTTCGGTGGTCAAGTCCGAGGCCAGCTCCAGCCCCCCTGTGGTTACCTCTTCCTCCCACTCCAGGGCGCCCTGCC
3	181430944	181431064	SOX2	121	AGGCCGGGGACCTCCGGGACATGATCAGCATGTATCTCCCCGGCGCCGAGGTGCCGGAACCCGCCGCCCCCAGCAGACTTCACATGTCCCAGCACTACCAGAGCGGCCCGGTGCCCGGCA
3	181431064	181431184	SOX2	121	CGGCCATTAACGGCACACTGCCCCTCTCACACATGTGAGGGCCGGACAGCGAACTGGAGGGGGGAGAAATTTTCAAAGAAAAACGAGGGAAATGGGAGGGGTGCAAAAGAGGAGAGTAAG
4	1795655	1795775	FGFR3	121	cccgccATGGGCGCCCCTGCCTGCGCCCTCGCGCTCTGCGTGGCCGTGGCCATCGTGGCCGGCGCCTCCTCGGAGTCCTTGGGGACGGAGCAGCGCGTCGTGGGGCGAGCGGCAGGTAAG
4	1800935	1801055	FGFR3	121	CGGGTTTGGGGGTGCCTGCCTCATGGTTGCCCATCTTCCCCACAGAAGTCCCGGGCCCAGAGCCCGGCCAGCAGGAGCAGTTGGTCTTCGGCAGCGGGGATGCTGTGGAGCTGAGCTGTC
4	1801055	1801175	FGFR3	121	CCCCGCCCGGGGGTGGTCCCATGGGGCCCACTGTCTGGGTCAAGGATGGCACAGGGCTGGTGCCCTCGGAGCGTGTCCTGGTGGGGCCCCAGCGGCTGCAGGTGCTGAATGCCTCCCACG
4	1801175	1801295	FGFR3	121	AGGACTCCGGGGCCTACAGCTGCCGGCAGCGGCTCACGCAGCGCGTACTGTGCCACTTCAGTGTGCGGGTGACAGGTGAGCTCTGGGGCCACGCCAGCTACAGAAAGGAGCCGAGTGCCG
4	1801446	1801566	FGFR3	121	TTGGTTGCGGCCATCTCTGCCTTGCAGACGCTCCATCCTCGGGAGATGACGAAGACGGGGAGGACGAGGCTGAGGACACAGGTGTGGACACAGGTAGGAGCAGGGTCCAGGGTTCAGGCC
4	1803058	1803178	FGFR3	121	CGGGTCATGGCCTTCACACGCACCTCGGCCCGCAGGGGCCCCTTACTGGACACGGCCCGAGCGGATGGACAAGAAGCTGCTGGCCGTGCCGGCCGCCAACACCGTCCGCTTCCGCTGCCC
4	1803178	1803298	FGFR3	121	AGCCGCTGGCAACCCCACTCCCTCCATCTCCTGGCTGAAGAACGGCAGGGAGTTCCGCGGCGAGCACCGCATTGGAGGCATCAAGGTGGGCGCGGCGGGGTGGCTCTGGGCCTGGCAGGC
4	1803263	1803383	FGFR3	121	GTGGGCGCGGCGGGGTGGCTCTGGGCCTGGCAGGCGCGGTGGTTGCTGCCTCCGCTCACTCACCCGCCCGCGTCCCGGTGCAGCTGCGGCATCAGCAGTGGAGCCTGGTCATGGAAAGCG
4	1803383	1803502	FGFR3	120	TGGTGCCCTCGGACCGCGGCAACTACACCTGCGTCGTGGAGAACAAGTTTGGCAGCATCCGGCAGACGTACACGCTGGACGTGCTGGGTGAGGGCCCTGGGGCGGCGCgggggtggggg
4	1803537	1803657	FGFR3	121	CCTGAGCGTCATCTGCCCCCACAGAGCGCTCCCCGCACCGGCCCATCCTGCAGGCGGGGCTGCCGGCCAACCAGACGGCGGTGCTGGGCAGCGACGTGGAGTTCCACTGCAAGGTGTACA
4	1803657	1803777	FGFR3	121	GTGACGCACAGCCCCACATCCAGTGGCTCAAGCACGTGGAGGTGAATGGCAGCAAGGTGGGCCCGGACGGCACACCCTACGTTACCGTGCTCAAGGTGGGCCACCGTGTGCACGTGGGTG
4	1804596	1804716	FGFR3	121	GCTGCCTCGGGGGCGTGCCTGAGCCGGGTCTCTTGTCCCCGCAGTCCTGGATCAGTGAGAGTGTGGAGGCCGACGTGCGCCTCCGCCTGGCCAATGTGTCGGAGCGGGACGGGGGCGAGT
4	1804716	1804836	FGFR3	121	ACCTCTGTCGAGCCACCAATTTCATAGGCGTGGCCGAGAAGGCCTTTTGGCTGAGCGTTCACGGGCCCCGAGCAGGTAACGACTCTGTCCCATGCCGGCCGGCACAAGAGCTCCAGCTCC
4	1805329	1805449	FGFR3	121	TGCAGCGGCTGGATCCTGCCGTGTGGACTCTGTGCGGTGCCCGCAGGGCGGTGCTGGCGCTCGCCTATCGCTCTGCTCTCTCTTTGTAGACGGCGGGCGCTAACACCACCGACAAGGAGC
4	1805449	1805568	FGFR3	120	TAGAGGTTCTCTCCTTGCACAACGTCACCTTTGAGGACGCCGGGGAGTACACCTGCCTGGCGGGCAATTCTATTGGGTTTTCTCATCACTCTGCGTGGCTGGTGGTGCTGCCAGGTACC
4	1806032	1806152	FGFR3	121	GCCTCAACGCCCATGTCTTTGCAGCCGAGGAGGAGCTGGTGGAGGCTGACGAGGCGGGCAGTGTGTATGCAGGCATCCTCAGCTACGGGGTGGGCTTCTTCCTGTTCATCCTGGTGGTGG
4	1806152	1806272	FGFR3	121	CGGCTGTGACGCTCTGCCGCCTGCGCAGCCCCCCCAAGAAAGGCCTGGGCTCCCCCACCGTGCACAAGATCTCCCGCTTCCCGCTCAAGCGACAGGTAACAGAAAGTAGATACCAGGTTC
4	1806503	1806623	FGFR3	121	GCCCTGTCGCCCACGCGGCGCCAACCTGCCCCTGCTGACCCAAGCAGGTGTCCCTGGAGTCCAACGCGTCCATGAGCTCCAACACACCACTGGTGCGCATCGCAAGGCTGTCCTCAGGGG
4	1806623	1806743	FGFR3	121	AGGGCCCCACGCTGGCCAATGTCTCCGAGCTCGAGCTGCCTGCCGACCCCAAATGGGAGCTGTCTCGGGCCCGGTCAGTGGTGCTGAGGGCCAGCGTTGGCTGTAGGGGGCTTGGTGGTG
4	1807022	1807142	FGFR3	121	GTGGTGGGCTGAGAGTGGGCGAGTTTGCACACTCATGGTCCCTCTGCCTCCACTGCCAGGCTGACCCTGGGCAAGCCCCTTGGGGAGGGCTGCTTCGGCCAGGTGGTCATGGCGGAGGCC
4	1807142	1807262	FGFR3	121	ATCGGCATTGACAAGGACCGGGCCGCCAAGCCTGTCACCGTAGCCGTGAAGATGCTGAAAGGTGAGGAGGGGGCGGCCAGGGGTGCAGAGCAGGGCTGGGGGCGCCGCCGCCGCCTGACA
4	1807281	1807401	FGFR3	121	ACAGACGATGCCACTGACAAGGACCTGTCGGACCTGGTGTCTGAGATGGAGATGATGAAGATGATCGGGAAACACAAAAACATCATCAACCTGCTGGGCGCCTGCACGCAGGGCGGTAGG
4	1807452	1807572	FGFR3	121	CGTCTGAGGAGCCCGTGTCCCCAGGGCCCCTGTACGTGCTGGTGGAGTACGCGGCCAAGGGTAACCTGCGGGAGTTTCTgcgggcgcggcggcccccgggccTGGACTACTCCTTCGACA
4	1807572	1807692	FGFR3	121	CCTGCAAGCCGCCCGAGGAGCAGCTCACCTTCAAGGACCTGGTGTCCTGTGCCTACCAGGTGGCCCGGGGCATGGAGTACTTGGCCTCCCAGAAGGTGGGCAGGGCGGCAGGTGTGGGTG
4	1807719	1807839	FGFR3	121	CTGGGAGCAGCGGGGAGAGGTGGAGAGGCTTCAGCCCTGCCTCCCACCCCTTCCCCAGTGCATCCACAGGGACCTGGCTGCCCGCAATGTGCTGGTGACCGAGGACAACGTGATGAAGAT
4	1807839	1807959	FGFR3	121	CGCAGACTTCGGGCTGGCCCGGGACGTGCACAACCTCGACTACTACAAGAAGACGACCAACGTGAGCCCGGCCCTGGGGTGCGGGGGTGGGGGTCATGCCAGTAGGACGCCTGGCGCCAA
4	1807959	1808079	FGFR3	121	CACCGCCTTCCCACACCCTCCCAGGGCCGGCTGCCCGTGAAGTGGATGGCGCCTGAGGCCTTGTTTGACCGAGTCTACACTCACCAGAGTGACGTGTACGTGTCCTGCAGAGCTCAGGCT
4	1808221	1808341	FGFR3	121	GGTGTCTGTCCTGGGAGTCTCAGGACAGCCTGACCTCACCTTCCCCTGCAGCTGGTCCTTTGGGGTCCTGCTCTGGGAGATCTTCACGCTGGGGGGCTCCCCGTACCCCGGCATCCCTGT
4	1808341	1808461	FGFR3	121	GGAGGAGCTCTTCAAGCTGCTGAAGGAGGGCCACCGCATGGACAAGCCCGCCAACTGCACACACGACCTGTGAGTGGCATCCCTGGCCCTCCACTGGGTCCTCAGGGGTGGGGGTCCCTC
4	1808548	1808668	FGFR3	121	CCCGCAGGTACATGATCATGCGGGAGTGCTGGCATGCCGCGCCCTCCCAGAGGCCCACCTTCAAGCAGCTGGTGGAGGACCTGGACCGTGTCCTTACCGTGACGTCCACCGACGTGAGTG
4	1808796	1808916	FGFR3	121	AAGAGGGGCTCGGTGGCACAGCGCTCACCCCGCCTCCCGCCAGCAGGAGTACCTGGACCTGTCGGCGCCTTTCGAGCAGTACTCCCCGGGTGGCCAGGACACCCCCAGCTCCAGCTCCTC
4	1808916	1809036	FGFR3	121	AGGGGACGACTCCGTGTTTGCCCACGACCTGCTGCCCCCGGCCCCACCCAGCAGTGGGGGCTCGCGGACGTGAAGGGCCACTGGTCCCCAACAATGTGAGGGGTCCCTAGCAGCCCACCC
4	55140988	55141073	PDGFRA	86	CTGTCCTGGTCATTTATAGAAACCGAGGTATGAAATTCGCTGGAGGGTCATTGAATCAATCAGCCCAGATGGACATGAATATATT
4	55141073	55141108	PDGFRA	36	TATGTGGACCCGATGCAGCTGCCTTATGACTCAAG
4	55144088	55144178	PDGFRA	91	GCTCTCATGTCTGAACTGAAGATAATGACTCACCTGGGGCCACATTTGAACATTGTAAACTTGCTGGGAGCCTGCACCAAGTCAGGTGGG
4	55144487	55144605	PDGFRA	119	TCATTTTCATACCCATCTCCTAACGGCTTTTGTCCCCATAGGCCCCATTTACATCATCACAGAGTATTGCTTCTATGGAGATTTGGTCAACTATTTGCATAAGAATAGGGATAGCTTC
4	55144605	55144607	PDGFRA	3	CT
4	55151980	55152069	PDGFRA	90	TGAGTCATTTCTTCCTTTTCCATGCAGTGTGTCCACCGTGATCTGGCTGCTCGCAACGTCCTCCTGGCACAAGGAAAAATTGTGAAGAT
4	55152069	55152153	PDGFRA	85	CTGTGACTTTGGCCTGGCCAGAGACATCATGCATGATTCGAACTATGTGTCGAAAGGCAGTGTACGTCCTCACTTCCCTCACTG
4	55561704	55561752	KIT	49	GGGAACCGTCTCCACCATCCATCCATCCAGGAAAATCAGACTTAATAG
4	55561752	55561824	KIT	73	TCCGCGTGGGCGACGAGATTAGGCTGTTATGCACTGATCCGGGCTTTGTCAAATGGACTTTTGAGATCCTGG
4	55592125	55592239	KIT	115	AAGCACAATGGCACGGTTGAATGTAAGGCTTACAACGATGTGGGCAAGACTTCTGCCTATTTTAACTTTGCATTTAAAGGTAACAACAAAGGTATATTTCTTTTTAATCCAATT
4	55593404	55593497	KIT	94	TGTTCACTCCTTTGCTGATTGGTTTCGTAATCGTAGCTGGCATGATGTGCATTATTGTGATGATTCTGACCTACAAATATTTACAGGTAACCA
4	55593535	55593645	KIT	111	ACAATAATTATTAAAAGGTGATCTATTTTTCCCTTTCTCCCCACAGAAACCCATGTATGAAGTACAGTGGAAGGTTGTTGAGGAGATAAATGGAAACAATTATGTTTACA
4	55593645	55593740	KIT	96	TAGACCCAACACAACTTCCTTATGATCACAAATGGGAGTTTCCCAGAAACAGGCTGAGTTTTGGTCAGTATGAAACAGGGGCTTTCCATGTCACC
4	55594172	55594292	KIT	121	TTAGCGAGTGCCCATTTGACAGAACGGGAAGCCCTCATGTCTGAACTCAAAGTCCTGAGTTACCTTGGTAATCACATGAATATTGTGAATCTACTTGGAGCCTGCACCATTGGAGGTAAA
4	55595457	55595576	KIT	120	ATATATCTCACCTTCTTTCTAACCTTTTCTTATGTGCTTTTAGGGCCCACCCTGGTCATTACAGAATATTGTTGCTATGGTGATCTTTTGAATTTTTTGAGAAGAAAACGTGATTCATT
4	55595576	55595577	KIT	2	T
4	55597479	55597554	KIT	76	TTCATCTCTCCCAGCAGCGATAGTACTAATGAGTACATGGACATGAAACCTGGAGTTTCTTATGTTGTCCCAACC
4	55599267	55599297	KIT	31	CCTCCTTACTCATGGTCGGATCACAAAGAT
4	55599297	55599387	KIT	91	TTGTGATTTTGGTCTAGCCAGAGACATCAAGAATGATTCTAATTATGTGGTTAAAGGAAACGTGAGTACCCATTCTCTGCTTGACAGTCC
4	55602659	55602779	KIT	121	ACAGGCTCGACTACCTGTGAAGTGGATGGCACCTGAAAGCATTTTCAACTGTGTATACACGTTTGAAAGTGACGTCTGGTCCTATGGGATTTTTCTTTGGGAGCTGTTCTCTTTAGGTAA
4	55946098	55946218	KDR	98	TGCTTCCTTTTAAACAGGAGGAGAGCTCAGTGTGGTCCCCGAGTCAGGCTGGAGAATCTGGGCTGTGCTACCGGTTTGCACTCCAATCTCTATCAGCTTTAAAAGTTCTGCTTCCTCACT
4	55946218	55946317	KDR	100	GGAGTACACGGTGGTGTCTGTGTCATCGGAGTGATATCCGGACTGGTAGCCGCTTGTCTGGTTTGAGCCTTCAGATGCCACAGACTCCCTGCTTTTGCT
4	55953747	55953849	KDR	103	GGGGGATGTTAGGCCATATACAGTACCTGATTCCTGCTGTGTTGTCATAATGGAATTTGGGGTCACATACTTCCTCCTCCTCCATACAGGAAACAGGTGAGG
4	55953849	55953867	KDR	19	TAGGCAGAGAGAGTCCAG
4	55955067	55955147	KDR	81	ATGTTCCACCAACTCTGAAAACGTGGGTCTCTGACTGGGCTCCCCGTGCCAGCAGTCCAGCATGGTCTGGTACCTAGAGA
4	55960929	55961045	KDR	117	AAGAGCATGCCATAGCATGCAGGAAGCACTAGCCAGTACCTTCCTCTTCTTCTACATCACTGAGGGACTTCTCCTCCACAAATCCAGAGCTGGCTGAGCTCTGGCTACTGGTGATG
4	55961045	55961083	KDR	39	CTGTCCAAGCGCCGTTTCAGATCCACAGGGATTGCTCC
4	55962447	55962512	KDR	66	AATATGAATGAGGATCTTGAGTTCAGACATGAGAGCTCGATGCTCACTGTGTGTTGCTCCTTCTA
4	55972904	55972915	KDR	12	ATTTCCTCCCT
4	55972915	55973024	KDR	110	GGAAGTCCTCCACACTTCTCCATTCTTCACAAGGGTATGGGTTTGTCACTGAGACAGCTTGGCTATAAGAAAGAGATAACAGCGCATATTATGATTTAATTTTTCTTTA
4	55979563	55979679	KDR	117	CTATAGTTAAGGTGCTCAAAAATTTCTTCATCTCACTCCCAGACTGGGTTTTTAGGTCTCGGTTTACAAGTTTCTTATGCTGATGCTGAAAAAAAGAGTTGACTGAACTTCCAAAG
4	55980288	55980362	KDR	75	TTACCTTCGAAGAAGGGTATTCCCAGTTGAAGTCAATCCCCACATTTAGTTCAGTTCTTGCTGTACAATTTAAG
4	55980362	55980408	KDR	47	ACAAGCTTTTCTCCAACAGATAGTTCAATTCCATGAGACGGACTCA
4	153244211	153244328	FBXW7	118	ATAGTTTTACAGTTCCATCATCTGAGCTGGTAATTACAAAGTTCTTGTTGAACTGTAAACAGGTCACAGCACTCTGATGCTTGTTGGGACCTAGACAAAAACCAAAAGAATTTAATT
4	153245362	153245440	FBXW7	79	TTTTGATATCCCAGATTTTAACTGTAGAATCTGCATTCCCAGAGACAAGAATATTGTCTTTGAGTTCCATTCCACTTG
4	153245440	153245560	FBXW7	121	TTAACGACTGGTGCCCTGTTAACGTGTGAATGCAATTCCCTGTCTCCACATCCCAAACACGGATTGATGTATCAAGAGATCCACTCACCACATGGATACCATCAAACTACAAAAGACACA
4	153247150	153247270	FBXW7	121	ATCTTACCTGTAATGAATAGACTCTATTAGTATGCCCCTGCAACGTGTGTAGACAGGTTTCAGTCTCTGGATCCCACACCTTTACCATAAAATCATATGCTCCACTAACAACCCTCCTGC
4	153247270	153247390	FBXW7	121	CATCATATTGAACACAGCGGACTGCTGCAACATGACCCATCAAAACATGTAAACACTGGCCTGTCTCAATATCCCAAACCCTAAGAGTGGCATCTCGAGAACCGCTAACAACTCTGCAGA
4	153249330	153249450	FBXW7	121	GTCCCAACCATGACAAGATTTTCCCTTACCTTTTTTCATGAAGATGCATACAACGCACAGTGGAAGTATGCCCATATAAGGTGTGTATACATTCTCCAGTCTCTGCATTCCACACTTTGA
4	153249450	153249568	FBXW7	119	GTGTCCGATCTGTAGATCCACTAATGATGATGTTGTCTCTCATTTGTGATGACCATACTCCACCTGTATGTCCCACTAATGTTCTCAGACACTGGAAAAACACTTAAGATGATTACTT
4	153250823	153250940	FBXW7	118	TTTGCCTGTGACTGCTGACCAAACTTTTAAAGTGTTGTCATCAGAACCACTAACTATTCGGTTACCACAAAACTGTAAGCATGTGATCACATGATCATCATGTCCTTTCAGCACCTA
4	153258923	153259020	FBXW7	98	CCAATGAAGAATGTAATTGATAATCTTTACCTCTTTAGGGAGCAATGAAATGAAGTCTCGTTGAAACTGGGGTTCTATCACTTGCATCATATGTTTT
4	153259020	153259043	FBXW7	24	ACTTGTGTTGGTTCACAACTATC
5	19473249	19473369	CDH18	121	TTCCACACTTCTTCCTTGTCATTGCTGAGGTTGTATATCCACTTACTCAGGAAGCAAATTCCACAAGGTTGCAAGAACTGACCCCCTAAGTTGTTCTTTCAGATTCTATTTCTCCATAGA
5	19473369	19473489	CDH18	121	GTTCAGCTAACTTTTTAAACTCGGGTCCCCAGTCTCCAAGGTAGTGATAATCCTGGTCTGATTGTGTCGTTGCTGAATCCAGCGAGCTGATAGACCCAGCTTCTGATCTCTGACCCTCAT
5	19473489	19473609	CDH18	121	AGGCATAAGTCTGAAGAGAGTCATAAGGGGGAACGCTAGGGTCTAGGTCTGCTTCTGCCAGTCTTTGCTTAATAAATTCCTGAACATCTATGCTTTCCAGGGTGGATGATGTCTGGTGTC
5	19473609	19473729	CDH18	121	TGGGAGTGAGCTTCACTTCAGGTCTGATATCCCTCCGGTACTTGAGCTCCTCAGCAGCAGAAGGATTCCTCAAGGCTGTGATGTCAAAGGCCTCTGTGTCTTCCTCTCCGCCTCCTTCAT
5	19473729	19473849	CDH18	121	CATCATAGGTGACCACGTTCTCCCGTACATCCTCTTCTGAAATGATCAAGGGCTCTTTTTTGCTGCGCCTCAGGGTGATAAAAAGTACCACAATTGCTGAGGAAGAATGGAAAAAGGATG
5	19483355	19483475	CDH18	121	TTCCCTCTCATTCAGAATTGCCATCATGCAAACTTAGGGTTTAGAATGACTTACCCAGGAGAATGAGAACACAGAGAAGAATAGCGATTAAGGCTCCTGTACTCAAACCAGCCGAGGACA
5	19483475	19483595	CDH18	121	GGAAGGCTTCTGCATGGCAGGTCCGCACACGCCCATCTCTCTCGCATGCACAAACCCTGATGGTGAGGGTGCTGCTGCTGCTGAGAGAGGGGATTCCACCATCAGAGATCATAATGGGCA
5	19483595	19483715	CDH18	121	GATAATACACATCCTGAACAGTTCGACTAAATCTCCTCCGCCTTGTCAGAATGCTGGCTGTGTTATCTATGATAGACATAAGCAAAACAAAATACACTTAGTCAAGCCGCCATTCAAGAT
5	19503099	19503219	CDH18	121	CCTTCATTGTCCTTCAGAGTGAAGTTTGGATTTACAGGCAGGCGTTCATCAAGAAAGAAGTTAAACCTTGGTCCATTGGCAAAATCATCTTTATCAGTGGCACTGATGGTATGAATAACC
5	19520706	19520826	CDH18	121	AAATAAAGGCGCTTGCATTTATTCCATTCAAATGAGGAGGAAGGAAACAATTAACTTACCTGGCCAGGCTTAGAATTTTCACATACAATAATATCATATTCCCTGGCAAGTTCGGGTGGA
5	19520826	19520946	CDH18	121	TTGTCATTGACATCCAGAACTCTAATACCCACTGTGACATGGCTCAGCAAATCAGGATTATCTGCAAAATACACAGGAATGTATTTAGTATTTCCATGCACACTTTAGAGGCTCGGTTTA
5	19543926	19544046	CDH18	121	TGTCTTCTTGTACAAGTGACATCTTTTACTGTGATACATAAAGTAGTTTACCAATTTCTGAAGCAGTGACTGTGATGTTGTACCATGGAGTTTCTTCTCTGTCGAGAACCTTTGTAGTCC
5	19544046	19544166	CDH18	121	TAATGGTCCCAGTATTGGCATCAATGTTGAAAAATCTGTCGTCTTCAACATTGTAGTTGATGAAGTATCTAGAGAAAAAAAGAGAAGTTTTTACTTGATGTTATAATGAAGAAAATACAA
5	19571634	19571754	CDH18	121	TGTGAGAGGCAATAAAAATCTTTCTATGTCTAAACGATTGAAGCATGCCATACCTTACTAAGCTGTTAGTACTGTCAGGATCTTGTGCCAAAACTGTACCAACGACGGTCCCAATCTTGG
5	19571754	19571874	CDH18	121	CATTTTCGTAGACTTCCATGAGGTAGGAAGGCATGGAAAATAGTGGTGGTTCATCTACATCCCCAACAATGATCTTCAGCATAGTAGCATCTTTAAAAGGACCCAAGTGAGAAAAGCGAA
5	19571874	19571994	CDH18	121	AATCAAGATGTGTATTTGCTCCTTCTATGTTGAGGGTATATGACTTCTTTTTCTCATAGTTCAGTGGCTGTGGGGAAAAAAAATAAGATTATGACTTTTATAAAAAAAGTCATATTATGA
5	19591139	19591259	CDH18	121	AATCACAAAAAGTATGTTCTTTTTACCTTCTTTAAAGAAAGGATTCCTTCTCTGGTCTCTTTGTCAGTGGAGATTGAGAATATTCCCATGCCATCACCATTTATGATGGAGTAGGTCATG
5	19591259	19591379	CDH18	121	TCAGCATTTGAGCCAGTGTCAGCATCATTTGCCTTGATTTTCCCAACAGCTGAACCAACTTGAGCTGACTCAGGAACATATAGCTGATAGTGTTCTGGAAGACATTTCATATTAAACATA
5	19612506	19612626	CDH18	121	AATGATAAATTCAAATCATGGAAAACAAATACGTACTTTGAGGAAAGCGTGGTGGGTTGTCATTGACATCGGTTAAGGTGATGTTGACTGTTGTAGATCCTGAAAGCCCTCCAACTTGCC
5	19612626	19612746	CDH18	121	CAGCCATGTCTTTGGCTTGAATGACTACGGAGTAATGTTCTCTGGCTTCTCTGTCCATGTTATGTAAGGCCGTTCTAATAACTCCTGTAATAGATATATTTTAATAAACAGTATGAGCTA
5	19721395	19721515	CDH18	121	ATTGCTTTGCAACTTACTGTAGCAAACGCTTGCATGCGAGTTATGTGTAAATGCACTAACCTGTTTTAGGGTCGACGGAGAAGTAGGGTTGTCCTTGGAGAATGCTGTAAACCACCCGAG
5	19721515	19721635	CDH18	121	CGCTGTTTCCATAGGTAGGGTCATCTGCATCAGTAGCTGTCACCTGTAGAACAGAGGTACCTGTGCATTCAGGAAAACAAATTTTAGTGTGTGATGGCATTTAGCATATGATTAATTTGA
5	19747017	19747137	CDH18	121	TAATTGCATAATCACAAAAATGATTTTTCTTACCCATATCTGACATTTCAGGCACAGTAACAATGTATGGTCCATCTGTGAATTTTGGAGCGTTGTCATTGATGTCTTGCACTTTGATGA
5	19747137	19747257	CDH18	121	TGAACTCGGATTCAGGCTCAAGAGGTTTGTTTGTACGTCTATCAATAGCTTGAGCATGAAGCACATAGTGGGTCTTCTGCTCTCTGTCTAGGCTTTTTGTTGAGTGGATATCACCCGTGG
5	19747257	19747377	CDH18	121	TATCGTCAATGATAAATATAGTCCCAGCACCCTCTCCAGTAAGGATGTACTTGACAGATCCATCACCTTTGTCAGAATTGGAGTGCAGCTGTGAAATACACATGGAATAATTTAGCATAT
5	19838861	19838981	CDH18	121	TCTTACCTTTCCAACATACTGAGGATCTGGTCCCATATGTTCTTCTAAAACAAAGAACTGATTCCATACCCATCCCCTTTTGGGACGATGATGGACTTCGGTTTCACCTTCAATGTGTTT
5	19838981	19839101	CDH18	121	GGTTTGGTTTCTCATCACCTTGATGGAGCTGTGGTGAGCAGTTCCATAACACCTCTGCACAAAACAGAGACACACTAGGACTGGACAGATGCAAGATGTGCTAGTAATTTTCATTGTAAG
5	112173836	112173836	APC	1
5	112173836	112173956	APC	121	ATAGAAGTTTGGAGAGAGAACGCGGAATTGGTCTAGGCAACTACCATCCAGCAACAGAAAATCCAGGAACTTCTTCAAAGCGAGGTTTGCAGATCTCCACCACTGCAGCCCAGATTGCCA
5	112173956	112173990	APC	35	AAGTCATGGAAGAAGTGTCAGCCATTCATACCTC
5	112174517	112174556	APC	40	CTGTTTATACTGAGAGCACTGATGATAAACACCTCAAGT
5	112174556	112174676	APC	121	TCCAACCACATTTTGGACAGCAGGAATGTGTTTCTCCATACAGGTCACGGGGAGCCAATGGTTCAGAAACAAATCGAGTGGGTTCTAATCATGGAATTAATCAAAATGTAAGCCAGTCTT
5	112174676	112174691	APC	16	TGTGTCAAGAAGATG
5	112175102	112175156	APC	55	TTTCAAGATGTAGTTCATTATCATCTTTGTCATCAGCTGAAGATGAAATAGGAT
5	112175156	112175276	APC	121	GTAATCAGACGACACAGGAAGCAGATTCTGCTAATACCCTGCAAATAGCAGAAATAAAAGAAAAGATTGGAACTAGGTCAGCTGAAGATCCTGTGAGCGAAGTTCCAGCAGTGTCACAGC
5	112175276	112175396	APC	121	ACCCTAGAACCAAATCCAGCAGACTGCAGGGTTCTAGTTTATCTTCAGAATCAGCCAGGCACAAAGCTGTTGAATTTTCTTCAGGAGCGAAATCTCCCTCCAAAAGTGGTGCTCAGACAC
5	112175396	112175483	APC	88	CCAAAAGTCCACCTGAACACTATGTTCAGGAGACCCCACTCATGTTTAGCAGATGTACTTCTGTCAGTTCACTTGATAGTTTTGAGA
5	112175521	112175636	APC	116	AGTGGAATGGTAAGTGGCATTATAAGCCCCAGTGATCTTCCAGATAGCCCTGGACAAACCATGCCACCAAGCAGAAGTAAAACACCTCCACCACCTCCTCAAACAGCTCAAACCA
5	112175636	112175756	APC	121	AGCGAGAAGTACCTAAAAATAAAGCACCTACTGCTGAAAAGAGAGAGAGTGGACCTAAGCAAGCTGCAGTAAATGCTGCAGTTCAGAGGGTCCAGGTTCTTCCAGATGCTGATACTTTAT
5	112175756	112175876	APC	121	TACATTTTGCCACGGAAAGTACTCCAGATGGATTTTCTTGTTCATCCAGCCTGAGTGCTCTGAGCCTCGATGAGCCATTTATACAGAAAGATGTGGAATTAAGAATAATGCCTCCAGTTC
5	112175876	112175996	APC	113	AGGAAAATGACAATGGGAATGAAACAGAATCAGAGCAGCCTAAAGAATCAAATGAAAACCAAGAGAAAGAGGCAGAAAAAACTATTGATTCTGAAAAGGACCTATTAGATGATTCAGATG
5	112175996	112176080	APC	85	ATGATGATATTGAAATACTAGAAGAATGTATTATTTCTGCCATGCCAACAAAGTCATCACGTAAAGCAAAAAAGCCAGCCCAGA
5	149433613	149433706	CSF1R	94	CTCCCTGTCGTCAACTCCTCAGCAGAACTGATAGTTGTTGGGCTGCAGCAAGGGCTGGGCGATATCCCCTTGCTCGCAGCAGGTCAGGTGCTC
5	149452984	149453080	CSF1R	97	GGTTGAGCCCCTCCCCCACGGTCACCTCCTGGATGAGGTTCTGCTCAGAGCTCAAGTTCAAGTAGGCACTCTCTGGAAAGCAGAACACACAAGCAT
5	170837492	170837610	NPM1	119	GTGGTTCCTTAACCACATTTCTTTTTTTTTTTTTCCAGGCTATTCAAGATCTCTGGCAGTGGAGGAAGTCTCTTTAAGAAAATAGTTTAAACAATTTGTTAAAAAATTTTCCGTCTTA
6	70589445	70589565	COL19A1	121	GGTTTCAAGGCACAATGAGACTCACTGGCCCTTGGAAACTTTGGCTTTGGATGTCAATATTTCTGCTTCCTGCTTCCACTTCCGTGACCGTTAGGGACAAGACAGGTATCCAGGCCAACT
6	70608817	70608937	COL19A1	121	TGCTTTTTTTCTTTTTAAATAGAAGAGTCATGCCCTATCCTGAGAATAGAGGGACATCAGCTGACATATGACAACATAAACAAACTTGAAGTTTCAGGTAGGCAATATAATCCTTTGCAA
6	70610120	70610240	COL19A1	121	CATTTTACAGGTTTTGATCTAGGAGACAGCTTTTCTCTAAGACGTGCATTTTGTGAAAGTGATAAAACCTGTTTCAAATTGGGAAGTGCACTTCTTATTAGAGACACTATGTAAGTAAAA
6	70637742	70637862	COL19A1	121	TTTTATTTTCTTGCAATCTCCAGTTTCCCCACAAAAGTTCTTTGTTTTCCTCCCACAGTAAGATATTTCCCAAAGGCCTTCCTGAGGAGTACTCAGTAGCTGCCATGTTTCGAGTACGAA
6	70637862	70637982	COL19A1	121	GAAACGCCAAAAAGGAACGGTGGTTTCTGTGGCAGGTTTTAAACCAGCAGAATATTCCACAGGTAAAGTACCATTAGAGTTGTGCTCATTAGTTTTCCTTGTGTAATTAAGCCAGGTGAA
6	70639274	70639394	COL19A1	121	ATTGATTTTTAAAACATTTAAAGATACTTTACATTTTTGCAGATTTCTATAGTAGTTGATGGTGGAAAGAAGGTGGTGGAATTTATGTTTCAAGCCACAGAGGGAGATGTGTTGAACTAC
6	70639394	70639514	COL19A1	121	ATTTTTAGAAATCGAGAACTCCGTCCTTTGTTTGATCGTCAGTGGCACAAACTTGGCATTAGTATACAATCCCAGGTCATTTCACTTTATATGGATTGTAATTTAATTGCGAGGAGGCAG
6	70639514	70639634	COL19A1	121	ACTGATGAAAAGGACACTGTGGATTTCCATGGACGGACAGTTATTGCTACGCGAGCTTCAGATGGCAAGCCTGTGGATGTAAGTTGTGATGTTAGTTGTGAAAGAGAACTAAAATTTCTA
6	70642654	70642774	COL19A1	121	TATTACTAATTTTTTCATAGATTGAACTTCACCAACTTAAAATCTACTGCAGTGCAAACCTCATAGCTCAAGAAACATGTTGTGAAATATCAGATACTAAGGTAAGTTAATTTTCTTTGC
6	70646619	70646739	COL19A1	121	GAACATGAGAATGTTTGGAATTGACCCCATTTCCTAAAGCCTCTTTTTGGATTTTAGTGCCCAGAGCAGGATGGCTTTGGAAATATTGCATCATCATGGGTAACTGCTCATGCCAGTAAA
6	70646739	70646859	COL19A1	121	ATGTCTTCATATCTGCCAGCAAAGCAGGAACTTAAAGACCAGTGCCAGTGCATTCCAAACAAGGTATGCTAGTTTTAATTGGTGCACACTGAAAGCCACTCCAGACTATGAGCCCAGCTC
6	70647901	70648021	COL19A1	121	GCTAACACAGATATGCATTTTTGCTCAGGGAGAAGCAGGATTACCAGGAGCTCCGGGTTCACCTGGGCAGAAAGGGCATAAAGGAGAGCCGGTAAGAAAAAAACAAATACTGATGGAGAA
6	70669849	70669969	COL19A1	121	TTATGGATCATAAACATTATTCTGTGTACTTCTTTTAGGGTGAAAATGGTTTACATGGTGCTCCAGGATTCCCTGGTCAAAAGGTAAAGAGTTCTTGAATGTTTCATCTGAGTTAAGAAT
6	70672679	70672799	COL19A1	121	ATTTTTATTACTATACACATCATATTCCTCTTCTACAGGGAGAGCAAGGTTTTGAAGGCAGCAAAGGAGAAACTGGTGAAAAGGTAAATATCTCTTTTTACATTCACATCTGTAAAAAGA
6	70733485	70733605	COL19A1	121	AGATTTTTCATTGTATAAATTGTTTCTTTTTAGGGTGAACAAGGAGAAAAAGGAGATCCAGCTCTGGCTGGCCTTAATGGAGAAAATGTAAGCCTAACTCTTTTTTCTGATACTCTGTTT
6	70744103	70744223	COL19A1	121	GTGAACTGTGTATTGGTTATATTCTTTCTACAGGGTTTGAAAGGTGACTTGGGTCCTCATGGTCCACCTGGCCCAAAAGGAGAAAAGGTATTGTGTTTACCCAGCCAAGCCCAACCTTTC
6	70745753	70745873	COL19A1	121	AGGGACTAGTGGTAATTGTAGCTTTTCTTTAATCTATTTTAGGGAGATACAGGACCCCCAGGACCACCAGCCTTACCTGTAAGTATTCTTGAAATCAAAATTCAAAATTGAAATCCATTA
6	70778281	70778401	COL19A1	121	AGTGTATTAACATGTGTCTCTTTTTCCTCATAGGGTTCCCTGGGGATACAAGGCCCCCAAGGTCCACCTGGAAAAGAGGGTCAGAGGGTAAGTAAAGCTGGAACAACTGGTGGGCATTAC
6	70812027	70812147	COL19A1	121	AGTATTTATCATCTATTCTTCTTTGGTTTCAAGGGAAGACGAGGGAAAACAGGACCTCCCGGAAAACCAGGACCCCCAGGACCACCTGTGAGTAAACAATACAATGACTGTCCCTTTAAA
6	70831743	70831863	COL19A1	121	ATTTGTCTTTGATTTGTTTATAATACAGGGACCTCCTGGAATACAAGGAATACACCAAACTCTTGGTGGATATTATAACAAGGATAACAAGGTATGGCTTCTTTTTTCCCATAATTTATA
6	70840027	70840146	COL19A1	120	ATTAGCGGATTTTTCTTTTGTATTTTAAATTGTTTTTCACCCCTAGGGAAATGATGAACATGAAGCTGGAGGCCTGAAAGGAGACAAGGTAATCAGAttttttttttttagatggagtc
6	70847548	70847668	COL19A1	121	AAATCTCTCTTCTGCTTTGTCTTGAAAGGGTGAAACTGGACTACCAGGATTTCCAGGGTCTGTTGGCCCTAAAGGACAAAAAGGAGAACCTGTAAGTATTTTAGCTTTGAGGACAGAGGA
6	70850803	70850923	COL19A1	121	TTCTAAGAGCGTTTAATTCTATTTTCTACCCCTTCTCCTTAGGGAGAGCCTTTTACAAAAGGAGAAAAAGGAGATAGAGTAAGTAGATATTTTATCACTACCTTGGGTTTTCTACTTCAT
6	70851742	70851862	COL19A1	121	TGAATTTAAGCATTACCCTTATAGTAATTATTTTATTTACAGGGAGAACCTGGGGTAATAGGATCACAGGGAGTAAAGGTAATTTCCTGGCATTCTTCAATTTCCTCTCCAACCTTAATG
6	70851881	70852001	COL19A1	121	AACATTGATCTTTCCTTCCCCCCACGTGTTTAGGGTGAACCTGGAGATCCCGGACCCCCTGGTTTAATAGGAAGCCCAGGACTAAAGGTATATAAGAAATAACTAAGATTTCTTGGGAAA
6	70852625	70852745	COL19A1	121	CAAAGCTAAAGTATATACCACCTTTTATTTTAGGGTCAGCAAGGATCTGCAGGCTCCATGGGACCCAGAGGACCGCCAGGAGATGTTGTATGTATAATGTCTTTGATATTTCTGGAATTG
6	70854068	70854188	COL19A1	121	ATTACTCTTTCCTATTAACTCTGAGTTTTCTAGGGATTGCCAGGAGAACATGGTATCCCAGGAAAACAAGGCATTAAAGGAGAAAAGGTATAGTTTACATTTTCCTCATTTTATATGTTA
6	70854794	70854914	COL19A1	121	CCTTGTTTTCTACAGGGAGATCCGGGTGGGATCATAGGCCCTCCCGGGCTTCCAGGTCCAAAAGGTGAGGCTGGTCCTCCAGGGAAAAGCCTGCCAGGGGAACCAGTAAGTATTAGCCCT
6	70856512	70856632	COL19A1	121	CTAGAAGAAGATATGTATTCATACTTTTTTTCTTTTAGGGATTAGATGGAAATCCTGGAGCACCTGGTCCACGTGGGCCAAAGGTATACAAATATTATAGTTAATTTTTAAGGAATGAAT
6	70856682	70856802	COL19A1	121	CAGAAGCCTTTCATTTCACAGGGTGAAAGAGGACTTCCAGGTGTTCACGGTTCCCCAGGGGACATAGGCCCACAAGGGATAGGAATTCCTGGCAGAACAGTAAGTGAAATTCATTCGAGT
6	70859553	70859673	COL19A1	121	TTCTTGGTGGAATTTTAATAATAAAATCTCATTTGTACTCAGGGCGCCCAAGGACCAGCTGGAGAGCCAGGTATTCAGGTAAGCTATTTAACTAATTTTTTAGCACAGCAAAGCCAGCTT
6	70859709	70859829	COL19A1	121	TAAGTAACTGTTTTTATTTCCCTCCTTTTCCAGGGTCCTCGAGGTCTCCCTGGGTTGCCAGGAACTCCAGGGACTCCAGGGAATGATGTAAGGACTTTCTTTATCTACCCTCCCCCATTT
6	70859850	70859970	COL19A1	121	GCAAAGATTGAACATGGATACCTCTGTTTTCAGGGAGTTCCAGGGAGAGATGGAAAGCCAGGCCTGCCAGGCCCCCCAGGTGACCCGGTATGTAGACAAACCTTGTCTGATTTATGTATC
6	70861249	70861369	COL19A1	121	TATAAATGCATGTATTTGGTTTTATCTTCTTAACCACAGATTGCACTTCCTCTCTTGGGAGACATCGGTGCTTTGCTCAAGGTACTCTATTGCTATGTAAGAAATTATGTGTTAATTTCC
6	70866010	70866130	COL19A1	121	CTCATTAGAATTTCTGTGGCAACTGCCAAGCCAGTGTCCCAGGGCTGAAAAGCAACAAAGGAGAAGAAGGAGGTGCTGGTGAGCCTGGAAAGTATGATTCCATGGCCCGGAAGGTGAGAA
6	70866174	70866294	COL19A1	121	TCCTCTCAGTTCTGTTCTTCCTCTGTCTTCTAGGGTGATATAGGGCCACGGGGTCCTCCAGGAATCCCAGGAAGAGAGGGACCAAAGGTAAGAAATTCTCTCCTCCACTTTCCCCTGTGG
6	70866528	70866648	COL19A1	121	TGCATGTGCTAGCTGAATGTATTGTCTTTTTAGGGAAGCAAAGGAGAGCGGGGCTACCCTGGGATACCTGGGGAGAAAGGCGATGAGGTAACAGATTCTTTTCTGATTATATAGTCCTAA
6	70871758	70871878	COL19A1	121	AACAGATTTTATGATGGGAACTATCTTTTCCAGGGTCTTCAAGGAATTCCAGGCATTCCAGGTGCTCCAGGCCCGACTGGACCCCCTGTAAGTATTTGTTAAAACGATTGCACTCACAGC
6	70873201	70873321	COL19A1	121	TTTCTGTAACAAACTTAGTTTTGTGTTTTACAGGGCTTAATGGGAAGAACTGGACATCCTGGTCCCACAGGAGCAAAAGGTGAAAAGGTACAAAGGAAAAGCCTCACTTACCATCCAAAC
6	70875794	70875914	COL19A1	121	ACGTCTACGCCGCTGATATGTCTATATATCCCTTGCAGGGCAGCGACGGACCCCCTGGGAAACCCGGACCACCTGGACCACCTGTGAGTTGTTCTAGGCTTAAAATTTAAAATTCATGTG
6	70877882	70878002	COL19A1	121	CAAGAATAATTCTGTATCTCACCTCTTTCCTAAGGGTATTCCATTTAATGAACGAAACGGCATGAGCAGtttatataaaattaaggtatttatatttgtaattatttaaaatCCAGTTAT
6	70878024	70878144	COL19A1	121	tctttctctttttcttttcttttcattttcttttGAAGGGAGGTGTGAATGTTCCCAGTTACCCAGGGCCACCCGGTCCTCCTGTAAGTACAGTTGTTTATCATCAAACACACTTTAGCT
6	70878500	70878620	COL19A1	121	GCTTTGGTCATTATTTGAAAAATGACTTTCCATGTTTCTCTTACAGGGCCCAAAAGGCGATCCTGGCCCAGTGGTATGAATGTTCCCATGTTTTGTGTCATTTAGAATATTGGTCTTTGT
6	70881822	70881942	COL19A1	121	TGCTCCTGCATTTCTTATGTTCATATTTAACAGGGAGAGCCTGGTGCAATGGGGTTGCCAGGATTAGAAGGATTTCCAGGTGTAAAGGTAAGCACAGAAGTTAGAAATGTGttcatttat
6	70886373	70886493	COL19A1	121	GATGTCATTAAAGTAGCAATGTTTTTAAATCCCAACAGGGAGATCGAGGCCCAGCAGGTCCCCCAGGAATAGCAGGGATGTCGGTGAGTTCAGATTACTTCACATCATTTTCACAGGTAA
6	70890165	70890285	COL19A1	121	TTTGGCTCCTAACATTTCTCTTCAATTTGCCTTGCCAGGGAAAACCTGGTGCCCCAGGGCCTCCAGGAGTTCCAGGGGAACCGGTGAGTTGGCAGTTACTTTCATGACAGTTGTACTTGT
6	70890324	70890444	COL19A1	121	TAATTTGTGTCTGTGGATGTGTTTATAGGGTGAGAGAGGACCTGTTGGAGATATAGGTTTCCCTGGACCAGAAGGACCCTCAGGAAAGCCAGTAAGTACTTCTTACTACTTAAAATATGC
6	70894552	70894672	COL19A1	121	TTAATGCAGAGTTAGAAATATTAATCCTTTTTTTCTTTATAGGGAATAAATGGAAAAGATGGAATACCAGGTGCTCAGGTATGGGAAATATGATTTAAAATAAAAGTTATAATGCATACT
6	70894724	70894844	COL19A1	121	GGCAAGGAGTGATTTTCATGTTGACATCTGTTTTTCAGGGCATCATGGGTAAGCCTGGAGACAGAGGCCCCAAAGGAGAACGTGTATGTATATTACTATTGTGATTGTTATTCAAGTCTG
6	70897743	70897863	COL19A1	121	GAGATTATTCTTTGTTATTATTTTTTCCTTAACAGGGTGATCAGGGGATTCCAGGAGACAGAGGCTCACAAGGTGAACGGGGAAAACCAGGCCTTACAGGCATGAAGGGGGCCATCGGTC
6	70897863	70897983	COL19A1	121	CTATGGGTCCACCAGGAAACAAGGGCTCCATGGGATCCCCTGGCCACCAAGGCCCTCCAGGCTCTCCAGGCATCCCTGGCATTCCGGTAAGTAGTGCTAAGACGCTTTAGGGCTCCTGGC
6	70899992	70900112	COL19A1	121	AACAACCTTTTTTTTTCCTTCTTCAGGCTGATGCAGTTTCATTTGAAGAAATAAAGAAGTATATTAATCAAGAGGTCCTAAGGATTTTTGAAGGTTAGATTTTCTTAATAACATTTTCGA
6	70909255	70909375	COL19A1	121	TTTGACATAAAATATTTCTGTTCTATGATATATTATTTTTTCTTCTATACATGAAGAGAGGATGGCTGTATTCCTATCCCAGCTCAAGCTGCCAGCAGCAATGTTGGCTGCCCAAGCTTA
6	70909375	70909495	COL19A1	121	TGGGAGACCTGGGCCACCAGGGAAGGATGGGTTGCCTGGGCCACCAGGAGACCCTGGACCCCAAGGTAAGTCTTCAAGTGTAATATTGGCTTATTGATTTTTAACTCTCTGTATTTATAA
6	70916583	70916703	COL19A1	121	TTTTATATATTTCTCACTTAGGCTACAGAGGACAGAAGGGAGAAAGAGGTGAACCTGGAATTGGGCTGCCAGGGAGTCCAGGTCTTCCTGGGACTTCAGGTAAGTGGGATATTGTCTTCA
6	70916794	70916914	COL19A1	121	GGAGAGAGGAAGGGCCATATGTGATCTGCATTGTAATTTTTTTTTTATGTCGTTAGCTCTGGGTTTGCCAGGCTCACCAGGTGCCCCAGGCCCACAGGGCCCCCCAGGACCCAGTGGAAG
6	70916914	70917034	COL19A1	121	ATGTAACCCAGAAGATTGCCTCTATCCTGTGTCTCATGCCCATCAGCGCACAGGTGGGAATTGAACACACCTGAAGAAGACTTGGTTCCTGGTAACATTTCCTTGCCACTGGAGCTCTCT
6	152527341	152527399	SYNE1	59	CCGCATGCTGGCTGATTTCCATTTCTCTTGGATTTCAGCGAGTTCGGCCTGCAAGGCG
6	152527399	152527519	SYNE1	121	GCCTCAGCGCCACTGTCCGCCGAGAGAAGGAGTTGCTTGCCAGCCTCCACAGTCAGGATGTAGCTGCCTTGTTGCCGCAGAAACACTTTTTCTTTGAACTGAAAGGAACCATAGCTTTTT
6	152697525	152697604	SYNE1	80	TGAAGACTAGTTGAAACTTCACTTATATTTTGAGGTATATCAAAACACTTGGCGGTAGTGATTTTTGCATTAACCAACC
6	152697604	152697724	SYNE1	121	ACTGCTGGAAATCCCTGAAGGCCTTTCGAAATCTTTGCTGTAAAATCTGTTCTTTATTCTGGCAGCCCTTGGATGCTTGCAAACAAAGACTGAAAAGGTGACGCAAAAATTTAATGGCAG
6	152762215	152762335	SYNE1	121	TTTTGCTTTGTTTTTTCTGAATATTGGGTACCAAGGAGCCATAATATACCTTTGTTTGTTCCAGTTCTGAAGATAAACTTTCCAAACTGCTAAAACTCAAGAAGCGTTCATGACTGGAAC
6	152762335	152762440	SYNE1	106	CTGTTTGAAAAAGGTATCTTACTACTGTTTCTTTGTTTGTTTCAAATCGCTCCCATTTTCTTAATGTGACCTAAATTTGAAAAAATAAACAACAAATGGGTTACA
6	152786373	152786493	SYNE1	121	TTGCATGAACCAATCTTACCTTTTTGGCATTTTCTGATTGATTGAGCATTTTTTCAGCATCCTCTAGCCAGGCTTGCAGACTAGCCACTGTATTGCCATAGCGATCCCAGTTAGAGATCA
6	152786493	152786612	SYNE1	120	CTTCTTCCAGCATGCTCCTCACACTCCTCACTTCTACTGAGAGATTCCTCCACTGAGCGGTGGTTTCATTCATGAATTTCATCACATTCTCAGCTTCTTCCACTGAAACAGATAAAACC
7	55086954	55087074	EGFR	121	TCTTCGGGGAGCAGCGATGCGACCCTCCGGGACGGCCGGGGCAGCGCTCCTGGCGCTGCTGGCTGCGCTCTGCCCGGCGAGTCGGGCTCTGGAGGAAAAGAAAGGTAAGGGCGTGTCTcg
7	55177413	55177533	EGFR	121	CTATCATTCCTTTGGGCCTAGGATTGCATTTATTTCCATGACAAAAGGGCCTGTCTGGTGTTTCAGCAAATGAAAACAAAAATATAAAGCCCATCTCCTTTTGAATGAGCTCTAAAACAG
7	55177533	55177653	EGFR	121	TTCTCCACTGGACTTCAGAACAAGAGGGAGCTCTGGGCTGCTGGCTGGTTGTGCATTTGCTGTGGGTTCCCTCCGGCAGGCGACCTCTCCGCGCTGAGAAGGTTATCCGGATAACCAAGT
7	55209934	55210054	EGFR	121	TGCATTTCTCAGTATTTCATGTGATATCTGTCTTTTTCTTCCAGTTTGCCAAGGCACGAGTAACAAGCTCACGCAGTTGGGCACTTTTGAAGATCATTTTCTCAGCCTCCAGAGGATGTT
7	55210054	55210174	EGFR	121	CAATAACTGTGAGGTGGTCCTTGGGAATTTGGAAATTACCTATGTGCAGAGGAATTATGATCTTTCCTTCTTAAAGGTTGGTGACTTTGATTTTCCTACACAAATAAAATTGGAGAAAAT
7	55210969	55211089	EGFR	121	ATCACGCATTTATGTTTTCTCTTCTTAGACCATCCAGGAGGTGGCTGGTTATGTCCTCATTGCCCTCAACACAGTGGAGCGAATTCCTTTGGAAAACCTGCAGATCATCAGAGGAAATAT
7	55211089	55211209	EGFR	121	GTACTACGAAAATTCCTATGCCTTAGCAGTCTTATCTAACTATGATGCAAATAAAACCGGACTGAAGGAGCTGCCCATGAGAAATTTACAGGGTGAGAGGCTGGGATGCCAAGGCTGGGG
7	55214246	55214366	EGFR	121	GGAATTTAAAGGAGCTGGAAAGAGTGCTCACCGCAGTTCCATTCTCCCGCAGAAATCCTGCATGGCGCCGTGCGGTTCAGCAACAACCCTGCCCTGTGCAACGTGGAGAGCATCCAGTGG
7	55214366	55214486	EGFR	121	CGGGACATAGTCAGCAGTGACTTTCTCAGCAACATGTCGATGGACTTCCAGAACCACCTGGGCAGCTGTAAGTGTCGCATACACACTATCTCTGCCTCCAGCTCCTATGGGGGACAGCTC
7	55218960	55219080	EGFR	121	ATGCATCTATTACTTTTACATTTCAGGCCAAAAGTGTGATCCAAGCTGTCCCAATGGGAGCTGCTGGGGTGCAGGAGAGGAGAACTGCCAGAAACGTAAGTCAGTGAACAGCCTCAGACC
7	55220238	55220358	EGFR	121	TGACCAAAATCATCTGTGCCCAGCAGTGCTCCGGGCGCTGCCGTGGCAAGTCCCCCAGTGACTGCTGCCACAACCAGTGTGCTGCAGGCTGCACAGGCCCCCGGGAGAGCGACTGCCTGG
7	55221654	55221774	EGFR	121	GCTGAGTGTACTTACCTCACTTGCCCAGCGTGTCCTCTCTCCTCCATAGGTCTGCCGCAAATTCCGAGACGAAGCCACGTGCAAGGACACCTGCCCCCCACTCATGCTCTACAACCCCAC
7	55221774	55221894	EGFR	121	CACGTACCAGATGGATGTGAACCCCGAGGGCAAATACAGCTTTGGTGCCACCTGCGTGAAGAAGTGTCCCCGTGAGTCCTCCTCTGTGGGCCCTCTAACTGGTCAGGCATCCTTGTCCCG
7	55223520	55223640	EGFR	121	AGGTAATTATGTGGTGACAGATCACGGCTCGTGCGTCCGAGCCTGTGGGGCCGACAGCTATGAGATGGAGGAAGACGGCGTCCGCAAGTGTAAGAAGTGCGAAGGGCCTTGCCGCAAAGG
7	55224169	55224289	EGFR	121	AGCTATTCTTAATCCAACAAATGTGAACGGAATACACGTCTCTCTTATCTCTGCAGTGTGTAACGGAATAGGTATTGGTGAATTTAAAGACTCACTCTCCATAAATGCTACGAATATTAA
7	55224289	55224409	EGFR	121	ACACTTCAAAAACTGCACCTCCATCAGTGGCGATCTCCACATCCTGCCGGTGGCATTTAGGGGGTGAGTCACAGGTTCAGTTGCTTGTATAAAGAAAAACAAAATCTGCCTTTTTAACTG
7	55224427	55224547	EGFR	121	TAATCACCCTGTTGTTTGTTTCAGTGACTCCTTCACACATACTCCTCCTCTGGATCCACAGGAACTGGATATTCTGAAAACCGTAAAGGAAATCACAGGTTTGAGCTGAATTATCACATG
7	55224547	55224667	EGFR	121	AATATAAATGGGAAATCAGTGTTTTAGAGAGAGAACTTTTCGACATATTTCCTGTTCCCTTGGAATAAAAACATTTCTTCTGAAATTTTACCGTTAATGGCTGATGTTTTGATATTTTTC
7	55225341	55225461	EGFR	121	CATCTGCCTTACAGGGTTTTTGCTGATTCAGGCTTGGCCTGAAAACAGGACGGACCTCCATGCCTTTGAGAACCTAGAAATCATACGCGGCAGGACCAAGCAACAGTAAGTTGACCACAG
7	55227811	55227931	EGFR	121	TTTTCTTCTCTCCAATGTAGTGGTCAGTTTTCTCTTGCAGTCGTCAGCCTGAACATAACATCCTTGGGATTACGCTCCCTCAAGGAGATAAGTGATGGAGATGTGATAATTTCAGGAAAC
7	55227931	55228051	EGFR	121	AAAAATTTGTGCTATGCAAATACAATAAACTGGAAAAAACTGTTTGGGACCTCCGGTCAGAAAACCAAAATTATAAGCAACAGAGGTGAAAACAGCTGCAGTAAGTCACCGCTTTCTGTT
7	55229137	55229257	EGFR	121	CCCCTCGGGTCCCTGCTCTGTCACTGACTGCTGTGACCCACTCTGTCTCCGCAGAGGCCACAGGCCAGGTCTGCCATGCCTTGTGCTCCCCCGAGGGCTGCTGGGGCCCGGAGCCCAGGG
7	55229257	55229377	EGFR	121	ACTGCGTCTCTTGCCGGAATGTCAGCCGAGGCAGGGAATGCGTGGACAAGTGCAACCTTCTGGAGGGGTAGGAGGTTATTTCTTTAATCCCCTTGCGTTGATCAAAAATAAGGCTCCAGG
7	55231411	55231531	EGFR	121	CTTCCTCCTCTCAGTGAGCCAAGGGAGTTTGTGGAGAACTCTGAGTGCATACAGTGCCACCCAGAGTGCCTGCCTCAGGCCATGAACATCACCTGCACAGGACGGGTAAGAGCCCCTTGC
7	55232931	55233051	EGFR	121	GAAAGAGACATGCATGAACATTTTTCTCCACCTTGGTGCAGGGACCAGACAACTGTATCCAGTGTGCCCACTACATTGACGGCCCCCACTGCGTCAAGACCTGCCCGGCAGGAGTCATGG
7	55233051	55233171	EGFR	121	GAGAAAACAACACCCTGGTCTGGAAGTACGCAGACGCCGGCCATGTGTGCCACCTGTGCCATCCAAACTGCACCTACGGGTGAGTGGAAAGTGAAGGAGAACAGAACATTTCCTCTCTTG
7	55236211	55236331	EGFR	121	CCAGGTCCTAATAAATCTTCACTGTCTGACTTTAGTCTCCCACTAAAACTGCATTTCCTTTCTACAATTTCAATTTCTCCCTTTGCTTCAAATAAAGTCCTGACACTATTCATTTGACAT
7	55237920	55238040	EGFR	121	TTAGGATCAGATTATAGTGTTACACCAGGGCTCCCCAGGCCTCTCACATATTGAAATGTACTTGTCCATCTTTCTCCAGGCCAGGAAATGAGAGTCTCAAAGCCATGTTATTCTGCCTTT
7	55238040	55238160	EGFR	121	TTAAACTATCATCCTGTAATCAAAGTAATGATGGCAGCGTGTCCCACCAGAGCGGGAGCCCAGCTGCTCAGGAGTCATGCTTAGGATGGATCCCTTCTCTTCTGCCGTCAGAGTTTCAGC
7	55238160	55238280	EGFR	121	TGGGTTGGGGTGGATGCAGCCACCTCCATGCCTGGCCTTCTGCATCTGTGATCATCACGGCCTCCTCCTGCCACTGAGCCTCATGCCTTCACGTGTCTGTTCCCCCCGCTTTTCCTTTCT
7	55238280	55238400	EGFR	121	GCCACCCCTGCACGTGGGCCGCCAGGTTCCCAAGAGTATCCTACCCATTTCCTTCCTTCCACTCCCTTTGCCAGTGCCTCTCACCCCAACTAGTAGCTAACCATCACCCCCAGGACTGAC
7	55238400	55238520	EGFR	121	CTCTTCCTCCTCGCTGCCAGATGATTGTTCAAAGCACAGAATTTGTCAGAAACCTGCAGGGACTCCATGCTGCCAGCCTTCTCCGTAATTAGCATGGCCCCAGTCCATGCTTCTAGCCTT
7	55238520	55238639	EGFR	120	GGTTCCTTCTGCCCCTCTGTTTGAAATTCTAGAGCCAGCTGTGGGACAATTATCTGTGTCAAAAGCCAGATGTGAAAACATCTCAATAACAAACtggctgctttgttcaatgctagaac
7	55238698	55238818	EGFR	121	AATGCATAATAAATAATTAACCACCAATCCAACATCCAGACACATAGTGATTTTAATTATTTAAGAGTAGTTTAGCATATATTGCTTTATGATTTAATTAAAAATCTCCAAAATATATGC
7	55238827	55238947	EGFR	121	AGAATGAGAAAAATGTATATTTCTCTTTCACTTCCTACAGATGCACTGGGCCAGGTCTTGAAGGCTGTCCAACGAATGGGTAAGTGTTCACAGCTCTGTGTCACATGGACCTCGTCAAGA
7	55240534	55240654	EGFR	121	TTAGAAGCTACATAGTGTCTCACTTTCCAAGATCATTCTACAAGATGTCAGTGCACTGAAACATGCAGGGGCGTGTTGAGTGCCAAGGCCATGGAATCTGTCAGCAACCTCACCCTTCCT
7	55240626	55240746	EGFR	121	GGAATCTGTCAGCAACCTCACCCTTCCTTGTTCCTCCACCTCATTCCAGGCCTAAGATCCCGTCCATCGCCACTGGGATGGTGGGGGCCCTCCTCTTGCTGCTGGTGGTGGCCCTGGGGA
7	55240746	55240866	EGFR	121	TCGGCCTCTTCATGCGAAGGCGCCACATCGTTCGGAAGCGCACGCTGCGGAGGCTGCTGCAGGAGAGGGAGGTGAGTGCCAGTCCTGGGTGGGCTCAGGAGCCCTCGCACCCCGACAGGA
7	55241555	55241675	EGFR	121	CTTTCCAGCATGGTGAGGGCTGAGGTGACCCTTGTCTCTGTGTTCTTGTCCCCCCCAGCTTGTGGAGCCTCTTACACCCAGTGGAGAAGCTCCCAACCAAGCTCTCTTGAGGATCTTGAA
7	55241675	55241795	EGFR	121	GGAAACTGAATTCAAAAAGATCAAAGTGCTGGGCTCCGGTGCGTTCGGCACGGTGTATAAGGTAAGGTCCCTGGCACAGGCCTCTGGGCTGGGCCGCAGGGCCTCTCATGGTCTGGTGGG
7	55242404	55242524	EGFR	121	TCTGTCATAGGGACTCTGGATCCCAGAAGGTGAGAAAGTTAAAATTCCCGTCGCTATCAAGGAATTAAGAGAAGCAACATCTCCGAAAGCCAACAAGGAAATCCTCGATGTGAGTTTCTG
7	55248958	55249078	EGFR	121	CACTGACGTGCCTCTCCCTCCCTCCAGGAAGCCTACGTGATGGCCAGCGTGGACAACCCCCACGTGTGCCGCCTGCTGGGCATCTGCCTCACCTCCACCGTGCAGCTCATCACGCAGCTC
7	55249078	55249198	EGFR	121	ATGCCCTTCGGCTGCCTCCTGGACTATGTCCGGGAACACAAAGACAATATTGGCTCCCAGTACCTGCTCAACTGGTGTGTGCAGATCGCAAAGGTAATCAGGGAAGGGAGATACGGGGAG
7	55259369	55259489	EGFR	121	CATGATGATCTGTCCCTCACAGCAGGGTCTTCTCTGTTTCAGGGCATGAACTACTTGGAGGACCGTCGCTTGGTGCACCGCGACCTGGCAGCCAGGAACGTACTGGTGAAAACACCGCAG
7	55259489	55259609	EGFR	121	CATGTCAAGATCACAGATTTTGGGCTGGCCAAACTGCTGGGTGCGGAAGAGAAAGAATACCATGCAGAAGGAGGCAAAGTAAGGAGGTGGCTTTAGGTCAGCCAGCATTTTCCTGACACC
7	55260436	55260556	EGFR	121	CCTCATCTCTCACCATCCCAAGGTGCCTATCAAGTGGATGGCATTGGAATCAATTTTACACAGAATCTATACCCACCAGAGTGATGTCTGGAGCTACGGTGAGTCATAATCCTGATGCTA
7	55266363	55266483	EGFR	121	TTCATTCATGATCCCACTGCCTTCTTTTCTTGCTTCATCCTCTCAGGGGTGACTGTTTGGGAGTTGATGACCTTTGGATCCAAGCCATATGACGGAATCCCTGCCAGCGAGATCTCCTCC
7	55266483	55266603	EGFR	121	ATCCTGGAGAAAGGAGAACGCCTCCCTCAGCCACCCATATGTACCATCGATGTCTACATGATCATGGTCAAGTGTGAGTGACTGGTGGGTCTGTCCACACTGCCTAGCTGAGCCTTGGTG
7	55267997	55268117	EGFR	121	TCCTTCCCCAGGCTGGATGATAGACGCAGATAGTCGCCCAAAGTTCCGTGAGTTGATCATCGAATTCTCCAAAATGGCCCGAGACCCCCAGCGCTACCTTGTCATTCAGGTACAAATTGC
7	55268844	55268964	EGFR	121	CGGGCCATTCTAATAGCCTCAAAATCTCTGCACCAGGGGGATGAAAGAATGCATTTGCCAAGTCCTACAGACTCCAACTTCTACCGTGCCCTGATGGATGAAGAAGACATGGACGACGTG
7	55268964	55269084	EGFR	121	GTGGATGCCGACGAGTACCTCATCCCACAGCAGGGCTTCTTCAGCAGCCCCTCCACGTCACGGACTCCCCTCCTGAGCTCTCTGGTATGAAATCTCTGTCTCTCTCTCTCTCTCAAGCTG
7	55269391	55269511	EGFR	121	AGCATTCCATGGGCAACTTCTCTGTTTCTTTTTCAGAGTGCAACCAGCAACAATTCCACCGTGGCTTGCATTGATAGAAATGGGGTATGTATGAACACCTTATAAGCCAGAATTTACAGC
7	55270203	55270323	EGFR	121	CTGCAGCTGCAAAGCTGTCCCATCAAGGAAGACAGCTTCTTGCAGCGATACAGCTCAGACCCCACAGGCGCCTTGACTGAGGACAGCATAGACGACACCTTCCTCCCAGTGCCTGGTGAG
7	55272889	55273009	EGFR	121	atcctgcatgggatggtgctttgctgattacttcacctctgatttctttccactttcagaATACATAAACCAGTCCGTTCCCAAAAGGCCCGCTGGCTCTGTGCAGAATCCTGTCTATCA
7	55273009	55273129	EGFR	121	CAATCAGCCTCTGAACCCCGCGCCCAGCAGAGACCCACACTACCAGGACCCCCACAGCACTGCAGTGGGCAACCCCGAGTATCTCAACACTGTCCAGCCCACCTGTGTCAACAGCACATT
7	55273129	55273249	EGFR	121	CGACAGCCCTGCCCACTGGGCCCAGAAAGGCAGCCACCAAATTAGCCTGGACAACCCTGACTACCAGCAGGACTTCTTTCCCAAGGAAGCCAAGCCAAATGGCATCTTTAAGGGCTCCAC
7	55273249	55273369	EGFR	121	AGCTGAAAATGCAGAATACCTAAGGGTCGCGCCACAAAGCAGTGAATTTATTGGAGCATGACCACGGAGGATAGTATGAGCCCTAAAAATCCAGACTCTTTCGATACCCAGGACCAAGCC
7	116339071	116339191	MET	121	TTCTCTTCATTTCTGACAACTGAACTGCTCTCGCCTTGAACCTGTTTTGGCAGATAAACCTCTCATAATGAAGGCCCCCGCTGTGCTTGCACCTGGCATCCTCGTGCTCCTGTTTACCTT
7	116339191	116339311	MET	121	GGTGCAGAGGAGCAATGGGGAGTGTAAAGAGGCACTAGCAAAGTCCGAGATGAATGTGAATATGAAGTATCAGCTTCCCAACTTCACCGCGGAAACACCCATCCAGAATGTCATTCTACA
7	116339311	116339431	MET	121	TGAGCATCACATTTTCCTTGGTGCCACTAACTACATTTATGTTTTAAATGAGGAAGACCTTCAGAAGGTTGCTGAGTACAAGACTGGGCCTGTGCTGGAACACCCAGATTGTTTCCCATG
7	116339431	116339551	MET	121	TCAGGACTGCAGCAGCAAAGCCAATTTATCAGGAGGTGTTTGGAAAGATAACATCAACATGGCTCTAGTTGTCGACACCTACTATGATGATCAACTCATTAGCTGTGGCAGCGTCAACAG
7	116339551	116339671	MET	121	AGGGACCTGCCAGCGACATGTCTTTCCCCACAATCATACTGCTGACATACAGTCGGAGGTTCACTGCATATTCTCCCCACAGATAGAAGAGCCCAGCCAGTGTCCTGACTGTGTGGTGAG
7	116339671	116339791	MET	121	CGCCCTGGGAGCCAAAGTCCTTTCATCTGTAAAGGACCGGTTCATCAACTTCTTTGTAGGCAATACCATAAATTCTTCTTATTTCCCAGATCATCCATTGCATTCGATATCAGTGAGAAG
7	116339791	116339911	MET	121	GCTAAAGGAAACGAAAGATGGTTTTATGTTTTTGACGGACCAGTCCTACATTGATGTTTTACCTGAGTTCAGAGATTCTTACCCCATTAAGTATGTCCATGCCTTTGAAAGCAACAATTT
7	116339911	116340031	MET	121	TATTTACTTCTTGACGGTCCAAAGGGAAACTCTAGATGCTCAGACTTTTCACACAAGAATAATCAGGTTCTGTTCCATAAACTCTGGATTGCATTCCTACATGGAAATGCCTCTGGAGTG
7	116340031	116340151	MET	121	TATTCTCACAGAAAAGAGAAAAAAGAGATCCACAAAGAAGGAAGTGTTTAATATACTTCAGGCTGCGTATGTCAGCAAGCCTGGGGCCCAGCTTGCTAGACAAATAGGAGCCAGCCTGAA
7	116340151	116340271	MET	121	TGATGACATTCTTTTCGGGGTGTTCGCACAAAGCAAGCCAGATTCTGCCGAACCAATGGATCGATCTGCCATGTGTGCATTCCCTATCAAATATGTCAACGACTTCTTCAACAAGATCGT
7	116340271	116340391	MET	121	CAACAAAAACAATGTGAGATGTCTCCAGCATTTTTACGGACCCAATCATGAGCACTGCTTTAATAGGGTAAGTCACATCAGTTCCCCACTTATAAACTGTGAGGTATAAATTAGAAATAA
7	116364834	116364954	MET	121	gtgctagattggaggtgaagaccctggagccagagagcctaggcttagtcctagccctgcactgaaggtaatgtgaacactcagtgcctcagtttccttctaggcttcttgttctgagat
7	116371697	116371817	MET	121	CTCTATGACCATATTTTATTCCAGACACTTCTGAGAAATTCATCAGGCTGTGAAGCGCGCCGTGATGAATATCGAACAGAGTTTACCACAGCTTTGCAGCGCGTTGACTTATTCATGGGT
7	116371817	116371937	MET	121	CAATTCAGCGAAGTCCTCTTAACATCTATATCCACCTTCATTAAAGGAGACCTCACCATAGCTAATCTTGGGACATCAGAGGGTCGCTTCATGCAGGTAAGTGCTTTCTGAGAGTAGCTG
7	116379951	116380071	MET	121	ATTTAAACTGAGCTTGTTGGAATAAGGATGTTATAACTTTTTTGCTGTTTAGGTTGTGGTTTCTCGATCAGGACCATCAACCCCTCATGTGAATTTTCTCCTGGACTCCCATCCAGTGTC
7	116380071	116380191	MET	121	TCCAGAAGTGATTGTGGAGCATACATTAAACCAAAATGGCTACACACTGGTTATCACTGGGAAGAAGGTAAGCTGTTCCCACAGGGAATTTCCATAGACGTGGTTTTTCCCAAATGCATA
7	116380872	116380992	MET	121	TCTGGAAGCTCTTTCCACCCCTTCTCTTCACAGATCACGAAGATCCCATTGAATGGCTTGGGCTGCAGACATTTCCAGTCCTGCAGTCAATGCCTCTCTGCCCCACCCTTTGTTCAGTGT
7	116380992	116381112	MET	121	GGCTGGTGCCACGACAAATGTGTGCGATCGGAGGAATGCCTGAGCGGGACATGGACTCAACAGATCTGTCTGCCTGCAATCTACAAGGTAGGAATCTCTAACAGCTGGCATACATGTttt
7	116395368	116395488	MET	121	TATATTGGGTTTTTTTAAAAGTTCTATGTTGTCCTTGTAGGTTTTCCCAAATAGTGCACCCCTTGAAGGAGGGACAAGGCTGACCATATGTGGCTGGGACTTTGGATTTCGGAGGAATAA
7	116395488	116395608	MET	121	TAAATTTGATTTAAAGAAAACTAGAGTTCTCCTTGGAAATGAGAGCTGCACCTTGACTTTAAGTGAGAGCACGATGAATACGTAAGGATCTTAAAATGCTTTGCTGGGGTGTGCTTGGAA
7	116397482	116397602	MET	121	TTTTCCAGATTGAAATGCACAGTTGGTCCTGCCATGAATAAGCATTTCAATATGTCCATAATTATTTCAAATGGCCACGGGACAACACAATACAGTACATTCTCCTATGTGGTAAGGAAG
7	116397639	116397759	MET	121	TTAAATTATAAGATGAACAAGTTACTTTGTTTTGTTTTTATCTCCCCTCCAGGATCCTGTAATAACAAGTATTTCGCCGAAATACGGTCCTATGGCTGGTGGCACTTTACTTACTTTAAC
7	116397759	116397879	MET	121	TGGAAATTACCTAAACAGTGGGAATTCTAGACACATTTCAATTGGTGGAAAAACATGTACTTTAAAAAGGTGTTGTAAATTTATTTTTTGTTGCATCTGTCAATTTGAATTAATATCTGT
7	116398473	116398593	MET	121	TAATAGCTAAAATTCACTTCCTTAATTTTTTTTGTTCAGTGTGTCAAACAGTATTCTTGAATGTTATACCCCAGCCCAAACCATTTCAACTGAGTTTGCTGTTAAATTGAAAATTGACTT
7	116398593	116398713	MET	121	AGCCAACCGAGAGACAAGCATCTTCAGTTACCGTGAAGATCCCATTGTCTATGAAATTCATCCAACCAAATCTTTTATTAGGTAAGTAGAAGCTTCTGATGGGTATAAGAAAACAATGAA
7	116399347	116399467	MET	121	CTGTAATCAGTGCAGGTGATTAAATTGAATCCCTCTCTTACAGTACTTGGTGGAAAGAACCTCTCAACATTGTCAGTTTTCTATTTTGCTTTGCCAGTGGTGGGAGCACAATAACAGGTG
7	116399467	116399587	MET	121	TTGGGAAAAACCTGAATTCAGTTAGTGTCCCGAGAATGGTCATAAATGTGCATGAAGCAGGAAGGAACTTTACAGTGGTAAGTCCTTTGAGCAATGGTTCTACTCAGAGCTCTGCATCTT
7	116403093	116403213	MET	121	CTTTCTCTAGGCATGTCAACATCGCTCTAATTCAGAGATAATCTGTTGTACCACTCCTTCCCTGCAACAGCTGAATCTGCAACTCCCCCTGAAAACCAAAGCCTTTTTCATGTTAGATGG
7	116403213	116403333	MET	121	GATCCTTTCCAAATACTTTGATCTCATTTATGTACATAATCCTGTGTTTAAGCCTTTTGAAAAGCCAGTGATGATCTCAATGGGCAATGAAAATGTACTGGAAATTAAGGTAAGAAATGC
7	116409652	116409772	MET	121	AGAACTGTGAAGTGTTAACAACCTTTTTTTTTTTTTTTCCTTTCAGGGAAATGATATTGACCCTGAAGCAGTTAAAGGTGAAGTGTTAAAAGTTGGAAATAAGAGCTGTGAGAATATACA
7	116409772	116409892	MET	121	CTTACATTCTGAAGCCGTTTTATGCACGGTCCCCAATGACCTGCTGAAATTGAACAGCGAGCTAAATATAGAGGTGGGATTCCTGCATTCCTCTCATGATGTAAATAAGGAAGCCAGTGT
7	116411509	116411629	MET	121	ATCATGGCTAAATGCTGACTTTTCTTTATTTGTCATTTTTAGTGGAAGCAAGCAATTTCTTCAACCGTCCTTGGAAAAGTAATAGTTCAACCAGATCAGAATTTCACAGGATTGATTGCT
7	116411629	116411749	MET	121	GGTGTTGTCTCAATATCAACAGCACTGTTATTACTACTTGGGTTTTTCCTGTGGCTGAAAAAGAGAAAGCAAATTAAAGGTGCATTTTTGTTACTGTTCATTTTTAGAAGTTACCTTAAG
7	116411852	116411972	MET	121	GGCCCATGATAGCCGTCTTTAACAAGCTCTTTCTTTCTCTCTGTTTTAAGATCTGGGCAGTGAATTAGTTCGCTACGATGCAAGAGTACACACTCCTCATTTGGATAGGCTTGTAAGTGC
7	116411972	116412092	MET	121	CCGAAGTGTAAGCCCAACTACAGAAATGGTTTCAAATGAATCTGTAGACTACCGAGCTACTTTTCCAGAAGGTATATTTCAGTTTATTGTTCTGAGAAATACCTATACATATACCTCAGT
7	116414930	116415050	MET	121	ACAGATCAGTTTCCTAATTCATCTCAGAACGGTTCATGCCGACAAGTGCAGTATCCTCTGACAGACATGTCCCCCATCCTAACTAGTGGGGACTCTGATATATCCAGTCCATTACTGCAA
7	116415050	116415170	MET	121	AATACTGTCCACATTGACCTCAGTGCTCTAAATCCAGAGCTGGTCCAGGCAGTGCAGCATGTAGTGATTGGGCCCAGTAGCCTGATTGTGCATTTCAATGAAGTCATAGGAAGAGGTAAG
7	116417422	116417542	MET	121	AAGTTCTTTCTTTTGCACAGGGCATTTTGGTTGTGTATATCATGGGACTTTGTTGGACAATGATGGCAAGAAAATTCACTGTGCTGTGAAATCCTTGAACAGTAAGTGGCATTTTATTTA
7	116418800	116418920	MET	121	GTTAATGTCTCCACCACTGGATTTCTCAGGAATCACTGACATAGGAGAAGTTTCCCAATTTCTGACCGAGGGAATCATCATGAAAGATTTTAGTCATCCCAATGTCCTCTCGCTCCTGGG
7	116418920	116419040	MET	121	AATCTGCCTGCGAAGTGAAGGGTCTCCGCTGGTGGTCCTACCATACATGAAACATGGAGATCTTCGAAATTTCATTCGAAATGAGACTCATGTAAGTTGACTGCCAAGCTTACTAACTGG
7	116422036	116422156	MET	121	TGCAGAATCCAACTGTAAAAGATCTTATTGGCTTTGGTCTTCAAGTAGCCAAAGGCATGAAATATCTTGCAAGCAAAAAGTTTGTCCACAGAGACTTGGCTGCAAGAAACTGTATGTAAG
7	116423320	116423440	MET	121	TTTCAGCCACGGGTAATAATTTTTGTCCTTTCTGTAGGCTGGATGAAAAATTCACAGTCAAGGTTGCTGATTTTGGTCTTGCCAGAGACATGTATGATAAAGAATACTATAGTGTACACA
7	116423440	116423560	MET	121	ACAAAACAGGTGCAAAGCTGCCAGTGAAGTGGATGGCTTTGGAAAGTCTGCAAACTCAAAAGTTTACCACCAAGTCAGATGTGGTAATGTATTGGTTATCTCTGAGTTTCTCCTCTTTTA
7	116435656	116435776	MET	121	ATATGTATGGTCACATCTCTCACCTCATCTGTCCTGTTTCTTGTTTTACTAGTGGTCCTTTGGCGTGCTCCTCTGGGAGCTGATGACAAGAGGAGCCCCACCTTATCCTGACGTAAACAC
7	116435776	116435896	MET	121	CTTTGATATAACTGTTTACTTGTTGCAAGGGAGAAGACTCCTACAACCCGAATACTGCCCAGACCCCTTGTAAGTAGTCTTTCTGTACCTCTTACGTTCTTTACTTTTACAGAAATGCCT
7	116435939	116436059	MET	121	GATATGAAGTAATGCTAAAATGCTGGCACCCTAAAGCCGAAATGCGCCCATCCTTTTCTGAACTGGTGTCCCGGATATCAGCGATCTTCTCTACTTTCATTGGGGAGCACTATGTCCATG
7	116436059	116436179	MET	121	TGAACGCTACTTATGTGAACGTAAAATGTGTCGCTCCGTATCCTTCTCTGTTGTCATCAGAAGATAACGCTGATGATGAGGTGGACACACGACCAGCCTCCTTCTGGGAGACATCATAGT
7	140419124	140419244	BRAF	121	GATGAAGACTTCTCCATGCAGTCAATCTTTATTATAGCAGTATTCGCATATTCACATCAAGTACATAGAACTTTTTTTGCCTTTTATATAATACAGTTTTTAAATAACTTTACACAGAAA
7	140419244	140419364	BRAF	121	TAAATTTCTTCAATCTGAATTTCAGCTATCTTTTTTTATTCTCCATGCTTTCTATCCAAACTGAACAATATTTTCTGTTATACAAATTTACATGAGAAAAACTCCAAAGTACAAATGAAG
7	140419364	140419484	BRAF	121	GGACCTGAGCAGGAAAGAGAACCAAAGTATCAGGAAGTGGGTATGGGGGAGAATTAAAAAAAATAATAAAAGATTCAAGCAAACATTGAGAATAGGGGAAAAGAGGGAGACATCATCCAT
7	140419484	140419604	BRAF	121	TTGACTGAAAATAAATGTCTTTTTTATGAATTGAAAAATAAGCTTTAAAAATAGTTACTCCATTGTAATTTTTGCAAAGCAGGTATAGAGAGGTCTGTGGACAATTAAAAAGTCCCCATC
7	140419604	140419724	BRAF	121	TTTTCACTGGGCACGCCCCAGACTCCACGAGAACCTTTTCAATGCTTGAGTGGAACTGAAGTGTACTAAACCCGAACCTTTGGCAGTAACAGAAAAGAGGAATGTGTGTGTGAGTCGCCA
7	140419724	140419844	BRAF	121	TAAGGTTTGGAGTGGTGAAACAGGAACCGTGAATTCACTGCAGTTCAAACAGGAAGCATCTCCCTTTCCTCTCCCTTACAGGAGTCATGTCCTCAAACCAAGGAATACATGAAAAGGGGG
7	140419844	140419964	BRAF	121	GATTTCCTTTTTCTTGGTCTAAACCAAAGAGCAATGACAACTACTGAATAAAATTCAGAGACACATGTTGATGAATGATCAAATTCAATCCCCTGATCAGTTGTATGATCCTATCTTAGG
7	140419964	140420084	BRAF	121	AAAGGCAGCAATTGCCATGTTGAGGAAAGGATCAGATGTACAACCAACAAATGAGATTACCACAAATACATATCACTGTGATACAGTCCTCAAAAATCAGGCGATATCATGAAGGCCAAA
7	140420084	140420204	BRAF	121	CTGAGTCTATATATGTGGCATGGCCAAAGGAAACACGGAGGACCCATGGATGCATTTTAAAATGAAGGCAGGAGAAGGGGACAGCACAGAGACATACACCCCTGTATGTAAACTAACATA
7	140420204	140420324	BRAF	121	ACATGAAGATAAATAAGACATAAAGGCTAGCCACTTACGTTGGTCATTAACATGAATAAAAAGGCATTATATGTTGATATAGCTGGTTTTAATCAGCTATGGAACATACACAAATGTATT
7	140420324	140420444	BRAF	121	AGGAAGGAATGATTCTTAAAAAAACCGTTCACAGCTTAGAATAAAAAGCATACTTATTGCACTCTTACATTTGATTTCAGGTAATTACAGTTTATTTCCCACCCTCACATTAATTTTTCC
7	140420444	140420564	BRAF	121	CTATCCTAGATTTACTGCCACCTCACCCCATTTTGGTCTCTGTTCTCTACATCTGTGCCTACTCTGTGAGCTTTGTTGTTTATGCTAGTTTGCAGTGACTTCCAACTCATACTCCACCAA
7	140420564	140420684	BRAF	121	AACACACGTGGGTTCAAAAACTTAACACAAAAATGCAACGCAGTAATTTTCAAAACAAAACCAGGACTAAGCAACTTCATCAAAACCCCCAATCCCACCCGTCAACAGACCCTTCCTTTG
7	140420684	140420804	BRAF	121	CGGCATCTCTTCACAAATTTTCTGCCAACTCTCCCGCATATGTGCTGTACATGAGAACCAGCGGTCACGGTGCTGGAGAATGAACTCGGCTGGCCGGGAGAAGCAGATGGTTTGTACAAA
7	140420804	140420924	BRAF	121	CATTTTTTGATACTACCATGAATAAACATATTTTAGTTGTTTTCAGAGCACTTCTATCTACAGAATTCTTTAAAAAAAAATGCACCTCTAAAAAATGGATACACTGGCTTACATTGGCTG
7	140420924	140421044	BRAF	121	TGTCCTCATACACACTCGTCAAGTCACTATAATTATTCAAAATAGCTAAATAAATGTCAACATTTTAATAAAGCTGATTTAGTAATTAATAAAACTTAACAGTTGAAGTTGTGGATGTTA
7	140421044	140421164	BRAF	121	AATAAAAGTACTTTAGTCACTCATTGAGTTGCCGACTAATTGCCCCATGCATTTTTTTTTTTTAAAGCACTGTTACCTTAATTTAAGATTTTAGGAGTTGGGTTTCTGTCCTTTTCCACA
7	140421164	140421284	BRAF	121	TTAAAAATACCTGATAGGAACTGTTAATTACCCTTTCCACAATTAACAAAAATTAGAATTGAATTTCAATTTAAATGTCTTTGCCCAAACAAAAGTGAAAATAGGTTATTTGAAAACAAC
7	140421284	140421404	BRAF	121	AAAACAGAGCTTACTGTCTAGTGTACTAATAAAACAAACATCTTACCAGTATTTTTAATTTTACCAGAGCTAGCAACATGGACCACAGATATACTGGTGACTCCGCTCTCCTCTGGCCAA
7	140421404	140421524	BRAF	121	GCTACAAATCATCACCTGAGGCAGAGATGCTACTACCCTCTTCTGGGGCTCAACTACCGATGGGCATCAGTAATCCATCCCAGTATAACATTTCAAGGATGTGCTGGAGACAATACATGG
7	140421524	140421644	BRAF	121	ACTTTCTCTTTCAATGGTGAGGAATGAAACAAGATACAAGAACCACAGCATGGAATATGTTTTCTTTTACATCCAATGGCCAGGTCATAAAGGATGCCTTGAGACCTCCACCCTGGCCCC
7	140421644	140421764	BRAF	121	CACAGCGCTTTGGGACAGGATGACTAACGCAGTCCAGCTTCATGTGCAATCAAGTCCCGGGAAGAAATTTACATTTCAAACTCTGAAAAATCAGTGTCTAGGTTGGCAGCAGTACTCTGG
7	140421764	140421884	BRAF	121	AAACTGATAAAACCAAATTCGGTCCTATATTTCAATTTCCCCTTCTAAGTTAATACATGATTGCTGCCCATCATACAGTACTTCAACCCTAAACTACAGCAATTTCTGTCAACATTTCTG
7	140421884	140422004	BRAF	121	TTGTATAAAAGTTCCATGCTTTGAAGAGCCTATGGGAGTAGAAAAAGTTTCTCTAGAAATGTCACTGAACTATATTTGCAACCTAGTTGCTCTATGTGATAAATATATCTGACTATACTA
7	140422004	140422124	BRAF	121	GGGATTATGTGCTTTAAAAAAATAATTTTGTTCACTGAAAATTTACCTGTGTGTTTTCTCATTGTTAAATGTGATTTTGGCTATAAACTCTTTAGTGCATTTACCTATGCAGTCTAAATT
7	140422124	140422244	BRAF	121	GCACTCTAAAAATTATTAACACAGCTGAGTTAAACCAGAGTGGCTGCTCTCTTCACAAATCACTGATTTCTGCTAAAATGTTAGCTTTTTTATTGCATCATGAAGGCACAGTAAGATCAT
7	140422244	140422364	BRAF	121	TTGGCAAATTGTCAAGGTATTTTTCTAGAGCCTCACCTACACCATTTCAACTCATGACCTGTAAGCTATTTGCTGTTCATACTCACAGTAAACCTTCCATCTCTGGCTATGGTGTTTATA
7	140422364	140422484	BRAF	121	GCCTAATGGTTGGAATCTGCTCGTCTCAAGGTGCTGGTATTCCTAGCACTAACAATGCCAACTTGGACAAAGAAGAGAATCTTGCAAAAAGAGTAATCATTCTACCCTCTTAGCTGGGTG
7	140422484	140422604	BRAF	121	GTCTTTCTATGAATGCCTGTGCATGTGACAAAGCTGCAGCAAACTCATTATGAGGATGTACTGTCATGCCAAGCCTACTGAAAATTAAAATTACATCACTGTTAGTGAAGTGATACCACA
7	140422604	140422724	BRAF	121	GCTATTTAATTTCATGCAATTGACTCAAGGTTAAGATTCTGAAACGTACCCCTAAACCGGTTCTGGCACCACTTTCAACAACATTCAGATATTCCGAGCAACACATTTTTTTACAGTATT
7	140422724	140422844	BRAF	121	ACTGCTTAAATGTATAATGCCCTTTAGGACAAAATGAGAGTGCTCAAATACAAGTACACAAAAAAGTTAAAATCTTAAATCATCGTCATGTTCTAGAGCTCCTGACTTTTCATATTTTAA
7	140422844	140422964	BRAF	121	AATAAATAACTATTCATTACCTCATTCTGAAGAGGTAGTTTTTTGTAGAGGTCACCTGAACCCTGCAATGTGGTTTCGAACTAAAGCTAGAGATGAGGTTTGCAAGCAGCTGGCGGGTGG
7	140422964	140423084	BRAF	121	ATGTACAGTGGGGACAGGTGAGATCTGAGGAGGATGTGCAGCAGCTCGCACTCCGCCTGGTGAATACAAGGTAACATCCTGTGATGAAAGTGCTGTCACCGCACCAAACCAGAAGCTAGG
7	140423084	140423204	BRAF	121	AAATATTTACAAAGTTTCAGGTTGACAGTGCTGCAGTCTTGAATTATTTCTTTATATACTGCTCTTTCTTCTCCAACACCAACATAAATATAGCATATATCATTTGTATGGGATTTTATC
7	140423204	140423324	BRAF	121	TTCTAAAATGCCCCAGTATGCCCTACTAGATCTCAAATACAATCAGGGGTGAGATATTCGGGAACCAGAATTTGACAGCTAGACAGAATCTTCTTTTAAGGTGCACATTAACAACAAATG
7	140423324	140423444	BRAF	121	ATCACACTGAATTTTCTATTCACAAATCCCTTTTATAAACTATTTTTTTGGTCAATATTATTTCAGTGGCAAAAGTCTAGGTCCTTGACTCTAACGATGAAAAAAGTCCATCAGGAATAC
7	140423444	140423564	BRAF	121	TACACAGTTACAAACAATCCTCTGTAGTTGCTCTCAAATTTTTCAGAAGGCTTCACCTCTCCCTACCAAAAATAAAACACACTACAGAAGGCACTGCAGCCACTTTACAGACAAGACTGT
7	140423564	140423684	BRAF	121	TACACCCTTACAAGATGATCAGTGACGCAGCCACATACTGTCTATACAATTACTCATAAAGTGCTTTTCACAAATAAGGACTTCTTCCTCGTTTTTTTAGGAGCTCAGTAAGTCTAACTG
7	140423684	140423804	BRAF	121	TTGTCTAAGCATCAAAAAATAAAGCAGATAAAACACAAATAAAACCTATTTTCATGTCATTTGTAAACTAGAGAAAAAACCTATTTCATAGAAAAAGGAAGAAAAGAGAGGtttaaatat
7	140423804	140423924	BRAF	121	tttattttttaaGGTATCTATAAAAATCTCAATATGCTAAGCCTGGCTCCTGGGCACAGCTTCATTTGAGATCAAGTCTGCTCCCCCGTTCAAATGAGATACCAGCCTATTCTAAAATGC
7	140423924	140424044	BRAF	121	AAGGGAAGAAAAAGTGTATCACCCTGAATATTGTTTAAGAAACTGAAATGCTAAGCTTCCTCCCTAATGGTACCGCCCCTGCCCCTGCCCCACGGAGGCAGTCCCGGACCCAGGCTGCAC
7	140424044	140424164	BRAF	121	ATGTTCTACCTCCTCAGCAGGACATGAAACACATCCTCTTGTTCAAGCCCAGGTCTCTCTACCTGCGGAAACTTGAAGCCAATCTTGGTAAAGGGAACACAGCCACATTTAAAAGCATCT
7	140424164	140424284	BRAF	121	AGAGATATATTTAAAAAGAAAAAACAGCCAATGCTTTTCAAGAGAGGCAGTATTATTGCACAGAAGATGTTCTTCAAATCAGCGTGAATTATTTCCACCTTTGCAATTTCTGAATTTTGT
7	140424284	140424404	BRAF	121	AAGACACTGCCCTGCTGATGTAAAACTTAAAAACAAATTTGCTTTTCAAACTGATTAATAACTTAAGGATCTTTTCCATTTTACTAGGACAACCTTTTACAAGACAATGAAAATTTCAAT
7	140424404	140424524	BRAF	121	AGGCTTTCTTCTGAATACATGTATGTTAGCAAAAATCTAATGGTAGTGAGCTTTTAGTGGCTGCAATATAGACAGCAGGGCCTGGAGTTACAATCTGAAATTTTTAAATAACAATTTCTA
7	140424524	140424644	BRAF	121	ATTCCTTGATTTATTCTGGGTCTTGTTTAATTTCTTTCAAGTCCTTGGCTATAGCTTGGTTGGTCTGATTTGATTTGTGTTCCTAAATTCTGAGTCTAGATTCCTGATAAGGGAGGTTTT
7	140424644	140424764	BRAF	121	CCATTAATTTGCCATTAATACATCCGCTTTCTTTGCTATGACTGTGATTGATATTACCCTTTAATAAAGGCCAAAGGAAGCTATAACTAGGTTATATTTTCCATTTGTGCAAAGATAAGA
7	140424764	140424884	BRAF	121	TTTAGGTTCTTAATGAATGCCAGTTCTTTCTATAAAAACAACTGATGACAGCTTTCCCACACCCTCCCTCAGTCCTAATATCCCTAAAATTGCTCTATTCTCTGTCTGGGAATTCAGCTG
7	140424884	140425004	BRAF	121	CCAAATTGCCCAACCTTTTGAAGACCAGGCTTGGGAAAAAAGGAAGAAGGAGAATGAATGGAGACGCCACCATTTTTATTTTAGGTTGCATATTCTAGATAAAAGACTAGAAAGAAGATG
7	140425004	140425124	BRAF	121	TGGGATATAGTGTTAGGAATCAGTTGGAAGAAACAATGAGATTATTAGCAAAGATGTTAGTGTGGATCCAGCAAGTACCATTAATTGAAAAATTATAAATATTTGTCATTATGCTAAGAC
7	140425124	140425244	BRAF	121	TCCTCATATTTAGGTAGAGAAAAGGATAATGATCTTTCTTAAAAGTTGTTTATATAACAAAAATACAATTTTCAGGATATATAATTCTGGTGGGAAGTATTGTTTTTTTCCAATTCAATT
7	140425244	140425364	BRAF	121	AAATCTGAAAATTATTTTCTTTTTAATAAAAATAGAAAAGAAGAAACTCAGAAATTAAAACCTGTACCTTATATTTAAATTATCTAAATTTCTCACATTCAAAACTGTTATTAAGCAGTT
7	140425364	140425484	BRAF	121	TTGTGGGGGTTTAGTTAGATACTGCCACGGCATTTTGTGCCCTGGACAAAGTAGCCGCATAAGTAGTTGGTGACTGGAAGAGCATAGGAGGAAGATATAAACTGTATTTCCTGAGAATTT
7	140425484	140425604	BRAF	121	GCTACATTGTGGAGGAAAAAAAAAAAACCCAAACACTTATCTTCATTGCTGGACCCAATGAGAAAGAAGGCAATGTGTGCCAGCACTATCTAGCCTGCTTGGTTAGACAGACCCCTCAGT
7	140425604	140425724	BRAF	121	GAGCAAGGAAACAAAAGGCCAGAGACCCCGGAGGTCAGGAAGAAGATGCAGCATGCCCTTTTCCTCCATACCAAGACACATCTACTCACCACTCAGCCTCCATTTAAATAAAATAGTTTC
7	140425724	140425844	BRAF	121	CTTTTGATAAAATCTGTCAAGGCCTGAACACGCACCACATAGAAAGGGCAAGCTGCATTTTTGTTCCATCCCTCAGAAACTAACTGGTGGTCACTAGGGGAAAGAGCTCCAAAACAAAAT
7	140425844	140425964	BRAF	121	TCCAGAACAGGAAAGAGAACGATGCTTGGTGATTGAAACTGCCCCATCAGATGATCAGCCACAAATTGATCTGGTGGTTAGAAGGGCAAAGTTGACTGGCAGACTTTCCATAGCAAATCT
7	140425964	140426084	BRAF	121	CCCAAGCTGTAGCAGCAGTTTCTTTCCATCATGCCTGACCATCAAAAGGTCAGAATTCAGGGTCTCTCCTCTTTCTTCCTGGGACTGGGCAGACTTGTATGCTCGTGGTATTTTTGTTGA
7	140426084	140426204	BRAF	121	AGAAACACTGGCAGCAGAGAATTCTGGTTCCTAAAACATTCTTTCCTCTTTTGTTGGATGGGAAATTCCATTCTGTTCCACATCAGCTTATGCATTGGAAATTTTGTATCTTTAAAAAAA
7	140426204	140426324	BRAF	121	GATTTGAGGAACAGAACTGTGTTTTGATGTTAACAAATTGTACGAACACAAGACTTAAGAAATAAGAGCAGATGCTGCCATGATGGTGGCTACTTGAAGGCTGCAAATTCTCCTGTAGAG
7	140433755	140433875	BRAF	121	TACTCATGTCAAACGTGCCACTCCTCAGCAATATTTTTGGTCACCTGCACTCAAAATTTATAAAAAGAAACTTAGTTTATTGCTTCAAGGAAATAAAAGACATCCACATTTTCCAAATTG
7	140433875	140433995	BRAF	121	ttataaaaagaaatagttatagaaaaattattaagaataataatagaattattaaattCTACTGACTTCCTAAATTAGATCTGTTCAGTTTGCCTTATCTAACCCAGGCTAACCGACTGC
7	140433995	140434115	BRAF	121	CAACTTCTCACCTGCAAACACAGGCATAGGTAGGGTCTTCTTCTGGAGTCCCTAGTGGACATGTGATAGCTGGCAACAAAAGTTGCATGAGAAACTGAAGTTTACTACTTAAAATAACCA
7	140434115	140434235	BRAF	121	AGTGAATGATACAAACCCGGAACAGAAAGTAAAGCCTCTAGAAGAGGCTCTGCCAATTTTTAGCAATGTCTATGTATTTTAACCCTTGGATGTTAAAAATCCAATGTTAAGTATAAATTT
7	140434235	140434355	BRAF	121	TAGTTTGGGGAAAAATTATATCTAGTCTTTAACCACACAAGTGTTCTTTGGTTCACCTTAAAAAAAAAGAGAGTATTTTATTCAATTTAACATATAAGCAAACATATGTTCATTTATTTT
7	140434355	140434475	BRAF	121	CCTTTTGTTGCTACTCTCCTGAACTCTCTCACTCATTTGTTTCAGTGGACAGGAAACGCACCATATCCCCCTGCCTGGATGGGTGTTTTTGGAGAAGCACAAGCATATAGACTAAAATCC
7	140434475	140434595	BRAF	121	TCTGTTTGGAAACCAGCCCGATTCAAGGAGGGTTCTGATGCACTGCGGTGAATTTTTGGCAATGAGCGGGCCAGCAGCTCAATAGAGGCGAGAATCTACaaaaaaaaaaagaaaaaaaaa
7	140439558	140439678	BRAF	121	TCTGTCTATGAATGTTAGTCTGTTCTTTTGGATAGCATGAAGCTTTTACTTACTTGGGGAAAGAGTGGTCTCTCATCTCTTTTCTTTTTGAGGCACTCTGCCATTAATCTCTTCATGGCT
7	140439678	140439798	BRAF	121	TTTGGACAGTTACTCCGTACCTTACTGAGATCTGGAGACAGGTATCCTCGTCCCACCATAAAAATTATCTGGAGAGAGAAAAAAAAGGGAAATAATTCAACCTTGTAGATAAGTTGAAAA
7	140447146	140447266	BRAF	121	TAACTAGTAAAGGCCTTACCCTTCTGTTGGTCACACATTCCTCTCATGGAGAGTAAGCCCTTGCCACATCATTTATTATACTCCCATGGAGGACAAAGCACCTAAAATGCCAAGAAGTGG
7	140449032	140449152	BRAF	121	TGGAGCCTTGTATATAGACGGTAAAATAAACACCAAGACGTGGTAAATATTTACCTGGTCCCTGTTGTTGATGTTTGAATAAGGTAACTGTCCAGTCATCAATTCATACAGAACAATTCC
7	140449152	140449272	BRAF	121	AAATGCATATACATCTGACTGAAAGCTGTATGGATTTTTATCTTGCATTCTGATGACTTCTGGTGCCTGTTAGAACATACAAAGAAAAATATTCTTCACTTCAATTGAATAAAGACTGAA
7	140453073	140453193	BRAF	121	CCATCCACAAAATGGATCCAGACAACTGTTCAAACTGATGGGACCCACTCCATCGAGATTTCACTGTAGCTAGACCAAAATCACCTATTTTTACTGTGAGGTCTTCATGAAGAAATATAT
7	140453949	140454069	BRAF	121	GTTTTCAAACTTCGCAGACAAATTTCAGGAAGGATACTATTACTCTTGAGGTCTCTGTGGATGATTGACTTGGCGTGTAAGTAACTGAAAAACAAAACATCATTTTAACCTGAGTAGGGC
7	140476680	140476800	BRAF	121	ATTTACAAGACATTTAACGAATGGAACTTACTCCATGCCCTGTGCAGTCTGTCGTGCAATATCTATAAGTTTGATCATCTCAAATTTGGTCTCAATGATATGGAGATGGTGATACAAGCT
7	140476800	140476920	BRAF	121	GGAGCCCTCACACCACTGGGTAACAATAGCCAGTTGTGGCTTTGTGGAATAGCCCATGAAGAGTAGGATATTCACATGTCGTGTTTTCCTGTACAAAGAAATGTGACAGTAAACATTAAA
7	140477773	140477893	BRAF	121	AATTCACACAAGCTCACCTGAGTACTCCTACTTCATTTTTGAAGGCTTGTAACTGCTGAGGTGTAGGTGCTGTCACATTCAACATTTTCACTGCCACATCACCTAAAAGGCAATTGTTAC
7	140481374	140481494	BRAF	121	CCATGCCACTTTCCCTTGTAGACTGTTCCAAATGATCCAGATCCAATTCTTTGTCCCACTGTAATCTGCCCATCAGGAATCTCCCAATCATCACTCGAGTCCCGTCTACCAAGTGTTTTC
7	140482769	140482889	BRAF	121	GACTTCTAAGAAGAAAGAATTCAGAGAAAAAAAGATATCATATACTCTTACCATTCGATTCCTGTCTTCTGAGGATGAAGATGACTTCCTTTCTCGCTGAGGTCCTGGAGATTTCTGTAA
7	140482889	140483009	BRAF	121	GGCTTTCACGTTAGTTAGTGAGCCAGGTAATGAGGCAGGGGGGGTAGCAGACAAACCTGTGGTTGATCCTAAATTAGTGAAAAGAAAAATGTATACATTAAGGAGGAGCAAGTATGTTAA
7	140487306	140487426	BRAF	121	GTTTCCTTGAGTTTTTAAAAAAACCTGAAATCACTACTTACCTCCATCACCACGAAATCCTTGGTCTCTAATCAAGTCCTACAAATAAATAGTAATGTATATTTATTCCAAGCAAGCATA
7	140494067	140494187	BRAF	121	ACTTGGTTTTTTTTTAGTTCTAGCAATGCTGGATACTTACATCAATATTGACAGGTTCTATTGTGTTTATATGCACATTGGGAGCTGATGAGGATCGGTCTCGTTGCCCAAATTGATTTC
7	140494187	140494307	BRAF	121	GATGATCTTCATCTGCTGGTCGGAAGGGCTGTGGAATTGGAATGGATTTTGAAGGAGACGGACTGGTGAGAATTTGGGGCCTGGAAAAATGAAGTCATTGGAAGATAAGATTCAGAGTAA
7	140500101	140500221	BRAF	121	GAGATCCAAAAGAAAGCGGTTCAAGTAGCATGTCGCCCAAGAGCAGAAGTCAAACCATACCCAATAGAGTCCGAGGCGGGTGCGGAAGGGGATGATCCAGATGTTAGGGCAGTCTCTGCT
7	140500221	140500341	BRAF	121	AAGGACGCCTCTTCCTGTGGTATTGGGTGGTGTTCAAAGAACTTGGAGACAAACAGCAAACTGTGAGGCAAAACAAAACAAACCTAACTTGTGCAAAACCCAGAAGCTTCATATACCAAA
7	140501166	140501286	BRAF	121	AGTGTAAAATGGTAGGTAGAAAAGAGATATTTTTGGATTACTTACTCAAGTTGGTCATAATTAACACACATCAGTGGAACTTCTGTACTACAACGCTGGTGAAATTTATAACCACATGTT
7	140501286	140501406	BRAF	121	TGACAGCGGAAACCCTGGAAAAGCAGCTTTCGACAAAAGTCACAAAATGCTAAGGTGAAAAACGTTTTTCGTACCTGCAAAGTAAAAAATCACAGAGATTTCAAAAACTCACAAGAAAAC
7	140507750	140507870	BRAF	121	GATACATACAAAGTTGTGTGTTGTAAGTGGAACATTCTCCAACACTTCCACATGCAATTCTTCTCCAGTAAGCCAGGAAATATCAGTGTCCCAACCAATTGGTTTCTTCTCTCTGAAAAA
7	140508683	140508803	BRAF	121	AACCATACCCATCCTGAATTCTGTAAACAGCACAGCACTCTGGGATTAGACCTCTCATCATCAGTGCTTTCTTTAGACTGTCTCGGACTGTAACTCCACACCTTGCAGGTACCTATGGTA
7	140534360	140534480	BRAF	121	TGAAAAATACAAAGAAACAGCAAAATGGTGATATTAAAACTGACTCACCACTGTCCTCTGTTTGTTGGGCAGGAAGACTCTAACGATAGGTTTTTGTGGTGACTTGGGGTTGCTCCGTGC
7	140534480	140534600	BRAF	121	CACATCTGTGGGATTTTGAAAAACTGAAAGAGATGAAGGTAGCACTGAAAGGCTAGAAGAGGAAGAAGATGTAACGGTATCCATTGATGCAGAGCTAGAAACAGAAAAATCAGTTCCGTT
7	140534600	140534720	BRAF	121	CCCCAGAGATTCCAATAACTGTTGTTCTCTTTGTTGGAGTGCATCTAGCTTGCTGGTGTATTCTTCATAGGCCTATAAAATAAAGCAGACTTATATTCAATCCGGACTTTGTCCTGACAT
7	140549901	140550021	BRAF	121	AAAGCTTACCTCCAGATATATTGATGGTGGATTATGCTCCCCACCAAATTTGTCCAATAGGGCCTCTATATGTTCCTGTGTCAACTTAATCATTTGTTTGATATTCCACACCTAAAAAAT
7	140624304	140624424	BRAF	121	AAACACCAGCCAGCCGCCGAGCCCGGAGTCGGGAGGGCGGCAGGGTGGCGCCAGCACTCACCTCCTCCGGAATGGCAGGGTCCGCAGCCGAAGAggccgcggcgccggcgccggcgccgg
7	148508704	148508804	EZH2	101	TCAGTGCCTTACCTCTCCACAGTATTCTGAGATGAATTCATTTTTCTGCACAGGATCTTTGATAAAAATCCCCCAGCCTGCCACGTCAGATGGTGCCAGC
7	151833903	151834023	KMT2C	121	CAAGGAATGCATTTCAGTTCATCCACTTCCGGCAGTTCACAGCTCCACAGTGACACGGAATCTTGTGCTGGTCATCTTCAAAGTCAAACTTATAGTCATAGCAGAGCTGCCCACGGCAAA
7	151835875	151835995	KMT2C	121	CTTACCTCTTCTCCTTTCTGGATTCTCCGACTGGAGCTGATGATAATTTTGTGTCCTCTCTCAAAAGTCACCACTTCAGCCACACAATTAGGTGCACACGAATGGTTGATATACCTGCAA
7	151836247	151836367	KMT2C	121	CGTCAGGTTCCTCGCTGTCTCACCTTGCGGGCCCTCCTGTGAGCGTCGCGTCAATCACATGGTCGTTATCCATGCGGAACATGTACACACCACGGTTCTGAGGGAAAAGTCAGTCAGTAA
7	151836758	151836878	KMT2C	121	CCTGAGACTCATAAAGCTTCTCTTTCCTGTTGGCTACTTCGTTTCGAATGATAGTCCCGATGTACTCAATGACCATGGTGTGTTTCTCAATGTCTCGAGCAGCATACAGGCCCAGCCCCT
7	151841762	151841882	KMT2C	121	TCTCTCCACTTCCTGTACACAAAGTATTTCTTCACCTGAATCCGAGACCGTGCCAGATACACATTGGATTTCCATTCAGTTTTCATCTTCCGGTACTGCGATGACTTGGAGTGAACAAAC
7	151841882	151842002	KMT2C	121	TGTTTACTATAAGGTGCGTTCAGTTCTCCAGTGACTGTGCTCTGAAATGACTTTGAGGTGCTGGTGCTGTTTAAGGTGTGAGGCCTGCAGACAATGGCATATCAACAGGAAAAAAATACA
7	151842188	151842308	KMT2C	121	ATACGCCTAGAAACCCTGGGCTGTACTATGTGAAGTTAAAACAAAATACCTTAACACAAACCTCTTGACATGGGCACTCATTTTAGGTTCAGAACGGGCACAACCTGTGGGGTTAACGGC
7	151842308	151842428	KMT2C	121	AAGAGGAAGTTCCATGAGAGGATTTCGGCCGTATCGGAAGGTATAATTTTCACATGCCTCAACCCCAGGAAGCTGAAAAGAAGCAAAGCAGACACAAAGTCACCCCATCTGATGGAGACT
7	151843632	151843752	KMT2C	121	CACTGAATCAGGAAAGCAATTCCAATCTCAAAGCCTGACCAAGACACTCACTGATTCCGCTATGCGTGCCACTGCAGAGACGGTCAGGCCAAACAGATCCTCTCCTTTTAAATACGCTGG
7	151843752	151843872	KMT2C	121	GAAAAGCTGGAGCATTTCAGACTTTTTTCTCACACATGCCACAGGCTCCAAAATCTTATCCCAGACACCTACACAGGGACAAAAACATAATTTTTATAGGAAATAGGATACAGTATAAAA
7	151845077	151845197	KMT2C	121	AGTAAGTAGCACTGCACAGCATGTGAACGGCAGACGTTACCTTTAGGTGAGATGTCACTTAGAACCAGGTCTTCATGGCCTTGTTCCACAATCCTGATGACAAACACTGGGCGCCCATCC
7	151845197	151845317	KMT2C	121	TTCTCCTCAATGGAGCACAGGTAGCGGCAGCGCCTATTGGCATAGCGAGTGCTCCAGTACAGCCGGCTGGCTTCATAGCCCACAGGGAAGAGTGCTTTAGGAGAATGGAATGCTTGCATC
7	151845317	151845437	KMT2C	121	TGCTGTGGAAGCAGCTGACCAATTGTGTGGAAGATGAGGCTACCCACGCGAAAGGTATGGTCCCGTTCTCCTCGTTGCACGATGCTAGCAATCTGTCGCACCTCATCACGCTGAACATAG
7	151845437	151845557	KMT2C	121	ACCCTCCTGAAGACTGCAAAGTAACTTAATTCTTGCTCATGAATTCCCTTTGGTTTGTGCATGGGGCAAAGCATAGTTTTGTCCTTAAAAAACATGCATTGTGCTTTAATGGCGCAAGTG
7	151845557	151845677	KMT2C	121	AAGTGATAAATGTTGGTGCATCGAAATCTGTGGCATCCACTAGTGGCACCCGTCTTGTGACAGAAGACACATTTCATTTGTAGGCCTCTCCTCAGAGCTAGCTCCACATTTATTAAGGCA
7	151845677	151845797	KMT2C	121	CCAGCCTGAGTCTCATAGACCTCCGTGGACCACAGAGCGCAGTTCAAGTGGACCCACAGATCCAAGTCAAGGTTGAGTAGCCTTGCTGGTCCATCTGTCAATCCATCACCTTCTTCATGA
7	151845797	151845917	KMT2C	121	CAAAAGCAACATTTCCGATAGTCTTTGGGCACAGGATCAGGTTTAAGGGAAGTGCCCAATTTCTTTAGAAATTCATCTATTTCATCCTCACAAGGTGGTTTAAATGTCCCCTTAGGGATT
7	151845917	151846037	KMT2C	121	ACAATATGAATGCTCCACTTCTTCCATTTCATTCCTCTCCATTTTTTATTGAGCGGCCTGCAATCTTCAAACCCACCATGGACAGCTCTTAGCCGAGGCTTCAGCTTGACTGTCACCTTC
7	151846037	151846157	KMT2C	121	AGCTCATCTGGCTTGGCCTCGACTTGGGCTGCTTCAAAAGCAGGAGGGAAGGCGATGGGTGGTGAGGCAGGGGGAGAAGCTTTCTCTGGGAGCTGGGGGAGACAGTGCACATCCAAAGTG
7	151846157	151846277	KMT2C	121	GAGATGTTGTTGCTGTACTGATGAAATGCTTTGGAAGGCGTTTCTCTCATAGGTGATTGTGGCAATGAAGGAATGGATTCCTGGGCAACATAAAGAAACCATGACAAAGAAAAATAATTC
7	151847978	151848098	KMT2C	121	TCTCACCTTGTTTTCTGAGTTTTTCGCTTGTGCAGTTGATGAATAAAGAATAAAGCAGTTATTACTACAGAAGACAATGTCCTTCTCTACCCTCTTGGTGCTTTCTCGGGAATCCTGAAA
7	151848476	151848596	KMT2C	121	CATTTTCGCTGGAGGTAGGAGGTGGGGTCATAAAAGGAGTAGCAAAGTACCTTGTTCAAAAGGGTCAGATCTTTGAAAGATTTCCGCACACCACTTCCAAGAATAACCACTTTACAATGA
7	151848596	151848716	KMT2C	121	CAACACCACTGTGGTCTGAGTGCTGCGCTTTCTGCAATACCATGACTAGAATCCTTATATCCAGAAAGACCTAAAGGCAATCAACTTTTGTTAGTAATTAAAACTGACTGATGACACAAG
7	151849734	151849854	KMT2C	121	CTTAACTTTTGAATCAGGAATGGATTTGGGGTTAACAAAAAGCTCACTAGCTCACCATTGCTTGTTGGAGGAAATGGTACATTAGGCTGCTTCAGCCGGTAAGAGCTCACTAATCTGGGA
7	151849854	151849974	KMT2C	121	GGGTTTGCAGATCCTGGCGGAGGCCCACGGAGAAGTAAATGCTGTCGATACTCCAAACCCGGGTTGATTCTGTGGCTACTGACCAAACCCATGGATGGGACATCTGGAGCACTGCTAACC
7	151849974	151850094	KMT2C	121	TCATAGCTGTTAGGGATTCGGACGTGAAGAAGGTCGGAAAATGCAGCCACAACACTGCTAATGTTCTAAAACCAAATGCAAATGCTGTATTATTCACCCAGAAGGCAACAGTGAACCACT
7	151851043	151851163	KMT2C	121	TGAAAATTGGGGACATACTGTTTAACATTAAGAAGTCATTTAATCTTTTACCTCAGCAGCTGTAGGATGCAGAGTAATTGCTACAGATATAAGACCTGATCTGGGACCATTTGGGGAAGG
7	151851163	151851283	KMT2C	121	ACCAAAAGGTGACGCAAAATATAAAGTGCCTGGCTCAGTTTTGATGTCATTCCTTCTTGATTCTGAACCTTTAAAAAGAGAGAAAAAAAAGAGGAAAATAGTGTTAATGGATTTTCAAAA
7	151851320	151851440	KMT2C	121	GGGAAATAATAAGGTTAAGTGTTGTTCTTACTTTTCCCAGCAGTGCTAGGAAGAATTGGAATGATGGGGGACGGCACCGGTTCTGGAGGCTCCTCCTTGACCAATGACAGATCTGGATAC
7	151851440	151851560	KMT2C	121	CTGCTCACTTCTACCCCAACCACACTCTCAGGAGAGGATGAGGGAACAAAACTGTCAGGAGTATCTCGATCACCACAGTGATCCTGTATCCTGAAAAAACATAAACACACACATCAAAGT
7	151852948	151853068	KMT2C	121	AAAGAAGAAATAACTAAGAATTATTTGAGAAAAAAATAACCTGTACCTTAATTCTTCCTGATTGTTATGAGGTGGTGTTGGGAGGGAGGCTGGCACATCAACTGTCTTGGGGCCCTGAGC
7	151853068	151853188	KMT2C	121	AAGAGCTCGGGCCAACAAGTCGTCCTGGGGTCTGAAGGGCAGCTGAAATGGTTTAGGTCCTAGAGTTTTGGTAACTGGAAAAGCAAAAACACAAAACCATAAATACATTCAGTCAATATT
7	151853272	151853392	KMT2C	121	GGAGGCTATAATCATACCTTCATGGCTCACTAACACTCCGGCTTTTCCAGCAAGTTCTTCAGTTGTTGCAAAACCATTGGCCATCTTCTGACAAGCCATAGGAGGTGGTGTAGGAGGAAG
7	151853393	151853512	KMT2C	120	GAGGCAGGGGGTGTTGGAGGATTACTTAAATTATTCTGCTGCAGGAGACCAAAAAATTTAAATTATATGCTACTGAGCGAATATGCAATGACCTTGCTAAAACGTAGTTCTGTGAATTT
7	151854808	151854928	KMT2C	121	AGATGAAGCAAGACAACACCTTGGCAGAGAAACATACCTTGTAGATCAACTGAGAATAGTAGTCCGAAACCCCTTCCAGGGTAGCACTGCCAAAAGTTCCTAGAAGTCGATTCCCACTAT
7	151854928	151855048	KMT2C	121	TAAATTGGCCACTGCCATAAGGAAGAAAGTGCGCAAAGTTCACTCCAATGATTGGTTCCATTAGAGGGAGCAGAGAGAGCTGCTATTAAAAAACACATTTAAGAGTAATGTACATGATAA
7	151855929	151856049	KMT2C	121	TAAATGACTCACCCTCACCTGTTTCAAGTGGGTAAACGTGTCAGTGCTAGAGTACATAGCTTGTTTCTCCTCTTCGTCCTTTTTCCTTTTCTTTGAGCGAGGTGCTGCTTTCTCACCCGT
7	151856049	151856169	KMT2C	121	CCTCTGAGTCCGTTTGCTTCGCTGTTTCTTGGTTTCACTTCCTCCATCTGTTTTTGGCAACTGGTTGCCACATCCAAAACCACCTTGCATTTGAGCCCCCAAAGTTTGCTAATGTAATTG
7	151859111	151859231	KMT2C	121	AATGTGGAAATACAGTTGCTGGTACTAATCTGCTGTAAGTATAATTTAAAACAAAAGAAAAAAGTTGTCGTTTTTATGATTTACACTTACCAGTCCTTCAGCTGGGTTCTGCTTCTCAAC
7	151859231	151859351	KMT2C	121	TAGTTTATTATCCTTTGTACAGTCATCTTCTGAACAAATACTGCCCTCAGGTTTTTGATTCAAAAGAGAAGATGACTTTTTATTTTTCAACAAGTGTTTCAGAAGTTCATTCCCTGAGTC
7	151859351	151859471	KMT2C	121	TCCTTTGGCAGCAGGGGCCCCAGCAGAATGGGGAGGACTCTGTGCTGAGGAGACAGGACAGGCTACAGCGTTTCCTTCTACCTTACTACCATTCTGTTCCTCCAATTTAGGCTCCTCTTG
7	151859471	151859591	KMT2C	121	GCCTGGGCAGGACTCTGTCTCAGCCTTTTCCAGTTTTATCTCTTCTGTTTTGGCAGGGGTTTCCATGGAGAGCTTGTCTACTTCTGAATTTGCATACGTCTGTTGATTTGGAGTTGCTTG
7	151859591	151859711	KMT2C	121	TGAGAAATCACTATTGGGCAGTTTGTTCTCTAATTCTGTACATAGCTGGCCTGCTGCCATATTGGGAGTGGATGGGCCGACTGGTTCCACCGACTCTTGGTCGGCTTGTTGAGGAAGCTC
7	151859711	151859831	KMT2C	121	ACTGGGTGTGCTCACTGCAGGAGTAGAGGTAGTTTCTGAGATGCCTGGAGTCGGTGGGGCAGTTATATCTGAATGGGGAGTTGATGGAGCCTTGGTGGATTCTGCATCAtcatctctttt
7	151859843	151859962	KMT2C	120	tcttttctttttccctttttcctctGGGATTATATCAGAATACAACTGAATGAGCGATTGGGTTGATCCCGGATAACTGTGTCCATGGGTTATAGTAGAATCTTGGCCACATGGGAGAC
7	151859962	151860082	KMT2C	121	TGCTATTAGCTACTGGAGGTGCTGCTGGTAAAGCAGGTGTAAAAGAAGGCCTCACTGGGGACTGCTGGAAGCTGGTCCCAGAAAGATTTCCATGTCCCTGCTTCACAGAAGAAAAATTTG
7	151860082	151860202	KMT2C	121	GGCTTCCAACAGGGATTGATGGTGAATCAGGAACAAATGAAGGAGGGCCTACCTGCCTTCGCTCATTAGTCTGCATGAAAGTTTGGGTGGAGGGTGAATTAATTGATCCTTGTTGTATAT
7	151860202	151860322	KMT2C	121	TCTGCTGCTGTAAAACCTGCCCCATTTGCTGTTGGTGTTGTGGAGACTGCTGAAGGGGTCCTAGAGGTTGCATAAAATCACAAGGTAAGTCGGAACTGTAGAAGGGAATCTGGGACACAG
7	151860322	151860442	KMT2C	121	ATGTCCTACTACTACTTATCTCAGAGCCCACCATACCATGCTGCTCCATTTCCATCCTCTGCTGCAAAGCTCTTTGTCTATCTACCTCCTGCATGAGTTGGATCCGTTGTCTCTCTTGCT
7	151860442	151860562	KMT2C	121	GTTCTCGTAAACGTTCCTTACGTTCCCGTTCTTGAAAACTTTCACTAAAGGGATTGTTGTCATCAAATTCTACCCGAGGTGGTGGTCCACTCTGTGGATTTGCATTTGAGACTGTCCCTG
7	151860562	151860682	KMT2C	121	GGGCTGGTGTACAAGTTTTTATTGGTAACTGGGCAATTGGGGGCTGAATTCTAGGAGGATTGAGGGGCAGGTGGGCAGGAGCACTGTTGGGTTGCCATCCAGGTAAACTGGGCATTCTAA
7	151860682	151860802	KMT2C	121	CAGGGCTAGTATGGCCAGAAATAACTGTTGTGTGCTGCTGGTGCTGAAGCTGCTGTGGCACCATGGGAAAGGTGGGTTGGCTCATGGTGGGTGGAGTGGCACCTGGAATTAGGGGTGGCT
7	151860802	151860922	KMT2C	121	GGGGCTGGACACTGGGCATCATGGTAGGTGGGGCCATTGCACATTGCTGCTGCTGTTTGATCCGATAATCTTCAATCAATTCAGCATGTTCTTTCTGTTGTTTACGAATCTGGAATAACA
7	151864227	151864347	KMT2C	121	TACCTGTTCTAGCTGTTTCTGAACCATGCTTTGCTGTTCAGTAACATGCTTGAGTTGTTCTGCATCTTCCTCTGGAAATTCACGCCCAGCTTTCTTGGCAGTACGTTGTTTAGCTGAAAG
7	151864347	151864467	KMT2C	121	GGCCTTCTTAGATTTTCTGTGAGCACCAATTTGTTCTTCAAGATACTTCTGCTGCATTTGAAGCAGCTGTTGGGTCTCCTGGAGCCACTCTTCATACTGCTTACGCTGTGAATCATCTGA
7	151866242	151866362	KMT2C	121	AACATTAACTTATTAGATTTATACTTACTGACAAAGCCTGGACCAAAATTTGGAGGATTAGGCCTAGAAATCTGATGTGTTATACTGCCATCCTAAAATAAGTAAAATTTACAAATATGT
7	151868327	151868447	KMT2C	121	ACTCATTACAGGCAGTGTTACCTGAGGAATGGCCTGTGGTCCAAGGTTCTGTCCTTCACTGTTCTGTGTTCCAGTTACCACCTGGCCCATAAAAGGGAACCTGTCAAAACAGGGTACACA
7	151871211	151871331	KMT2C	121	CTACCTGCTCATCACCATTGGTGGCATGCCCAGATTGTTTTGTGCCATCACTTTATTTATACCTTTAAGGGCCACCATTTTGGCTTTCATTATAGGATCTGTAATTGCATCAAAATCTAG
7	151873225	151873345	KMT2C	121	CCACTCTAATACCCATAGTAATATACGTTGAGACTCAAGAAAACTCCTACCAATATTAGGGAAGAACGGTTCTGATCGCTGACGAATCATGGCTTGCATCTGTCTTTGCTGCTGCTGTTC
7	151873345	151873465	KMT2C	121	TTGCCTTTCTTGATCCAAAAGATCCTGTAGAAGTAGAGGCTGTTCTTCTAGAAGAAGGGGCCTCTCTCTATTCTGCTGTGCTAATGTTTGAGGAATCATTAGCTGTTGGGGTCCAGACAT
7	151873465	151873585	KMT2C	121	GCTACTGGTACCAGACTGACTTGTTTGAGGCCCAGTTTGAGTTGCAGGTTTTCCTGTCCCCAGACTGTGGTTAACTGTTGATTGACCTGGAATGAGCCCTGGGTTTACCTGCACACCCTG
7	151873585	151873705	KMT2C	121	AGAAAAAACATGGTTTACCCTAGAGACTACTGTCACATTAGAATTCATGGCATTATCCAAAACACGGCCAGGCGGTGCTATGAAAGGAGGCAAACTTGACACATGATTGGATGGGGAGGC
7	151873705	151873825	KMT2C	121	CGGCAGAGTTGGTGGTGGTGGAGACCCCGATGGCCTAATGTCTGAATTATCAGATTTCTCATTAGCAAGTAAACTTGAGAGAACTGGAGTTGATCCAGTTATGCCACAAGAGTTTATTAC
7	151873825	151873945	KMT2C	121	ATCTTGAGCAGGTAGTTGAGTGGATGCCTGAATGACATTTGCACTGGGGCCAGCAGTTTCTCGATTGGTTCTTTTCTCAAATAGATCTGGATCACAAGGATGCAAAGAAGTCTTTTCTCC
7	151873945	151874065	KMT2C	121	ATCATTTAGGTCTGAGTGAGCAGAAGCCTGTGAGCAAGGAGTGTCAACATTATCTTTATTCTCATCATTTTTTTCAGTTTCACATTTGGATTCCACCTTAGAATTTGGAGACAGTACTTC
7	151874065	151874185	KMT2C	121	CGTTTTTACCTCATTGGTAACAGTGGATTTTTTCTGTGGTGAATGTTTATCAGAGAGAACCAGAGTTTTGTTTTCTTGTTCCTTTTTTTTTGGTTCAACAGATACACACTGATTATCTAA
7	151874185	151874305	KMT2C	121	CTTATCATCAATTGGAAGGTCTAGTTCCTCATTAAACATGCTTTTCTTATCTCCCATGTCAAGTTCTGGATCTGTATATGCAATGATATCAAACTCTCCTGACCTTAAGAGGTCATCCAG
7	151874305	151874425	KMT2C	121	GTTGGGATCATTAGTTTCCAAATTATCTAAAGTATCCAATTCAACTACCTTGCCATCCTCTGTATCTAAATTTAAGTTTTCAAGATCTTCATCATCTAAGTCTTTGACTTCAACCCCCTC
7	151874425	151874545	KMT2C	121	AAGGTCTTTAACATCCAGTTCCTTCACAGAAGGGTCATCAGAATCAAGTTTTTCCTCTAGACCATCAGAAGGCTGGGTGGTTATCTGTAAATTATCAGACGTTGTTTCAGACGGTACAGA
7	151874545	151874665	KMT2C	121	TGTTGACAAAGGAGCTTCTGAAAATTCACCACCTAGTGGATGGTTCAGAGTCCTCATGACCATAGAAGATGAATGGACAGAATGACCTTGCTCTTGTTGAGATGGTGGCACTTGTTCCAA
7	151874665	151874785	KMT2C	121	ATCTGGGTGCACAGGTAGCTGATTAGGTAGACCCTGGGGAGGTCGTCGCATGGGGTCTGTGTGTCTAGGGCCCGGAAAGTCTGGCCGGGGAATGAAGTTTCCATGTCTCAGATTAGAAGA
7	151874785	151874905	KMT2C	121	TGCCTCTACAACGCTGCCAGGTGGAGCACTGAAAGGCAGCCGTTGCCTTCCGTCAGGAGCCCTATGTCTCAGTTCAATATATGCTTGGCCCAGTATGTTGTGCTGCTGAACTGGCAAGCT
7	151874905	151875025	KMT2C	121	CTGTGGTGAAAAATGCTGAGGAAGTCCAACTGGATTATTCATTTGTGAGTTATTTAAAGGCCTAGGCATATCTACAGATACTGATCTTCTTAGCTGTGGAGAAACTCCAGATCCCTGTAT
7	151875025	151875145	KMT2C	121	TTGCTGAGGAGGCACAAGGAAGCGCTCTTGACTCGGCATGGTACCATGACTACCTCCTGGAAATCCAAATCTTTTaaaaaaaaaaaaaaaaaaaaaaaaaaaGCAAATAGGTATTATGTT
7	151876885	151877005	KMT2C	121	AATTTAAATTCGGCAGGAAATTAAAAGCATTACCTAAATCCATGAGGTCTCATCCCCATACTAGCAACATCAGGAGGATAGGGTCCACGCTGATCTTTTGGGAAAACAGCATATCTAGGT
7	151877005	151877125	KMT2C	121	CCTAAAGGAGGGGCAACAGGAGACCTAATGTTCCCAGGATAGGGAGGTGGGGGTCTGGTGAAAGCCTGGTTAACATTCTCTGGTTGCCAGTGTTGAAGAGGCCCTGGATGAGGCACTGCG
7	151877125	151877245	KMT2C	121	GGTGAGTCCTGTGACCCCTTCTCCTGTCGACCTGCAATCTTCTTCTGCTGTTGCTGCTGGAGAATGATTTCACGTAACTTCTGCCGCTAAATGGGAAGAAACAAAAATCACTGGGATTTG
7	151877777	151877897	KMT2C	121	AACATACAATGTGTTTACCTGTCTCAATTTCTCTGTATCTGCTTGGGCCATATTTACAGTATTCTGTGTATCAGTTACTCCTGAAGTTGGCACAGGTCCAGGAAGTTGGGAGACACCAGA
7	151877897	151878017	KMT2C	121	GAACTGCTGGCCTTGGGAGTGCATTGGAGAGTTTGAAGATGCACAGAAGCTCCCCTCTGATCCAGGCCTTGGCTGATCAGCAACATCATGGGCAGTTTGACTTGTTCCAAAAGAGTCAGA
7	151878017	151878137	KMT2C	121	CTGAGATCTTGGAGTCATTGGAGACTGATCATAGGGATCACGGGCAGCAGATGGGGAAACACGGCTAAATGTGTCTGAAAGACCAGGTCCAGGGGGCCTAGGTGTCTGGGAACATGTATC
7	151878137	151878257	KMT2C	121	AGGTGGCCTTACCAACGGGCCAGGTAAAGCTGGTCCTCGGTTTTGTGCTGCTTGCAGGAAAGGATCCTGATTTGGCATGAGGACTGGTCTTGTCATTGAGGACCTAGTAAAACCCTCTGA
7	151878257	151878377	KMT2C	121	AATCCTTGGCCTTGGTGTTGCTGGTGGCTGAGAGTAAGGGACAGAAATTCCAGGTCTTGGTGTTCCAGGAGGATGAGCATATGGATCAGAATGCCTCTGATTTGTTACAGGTGTAACAAA
7	151878377	151878497	KMT2C	121	CAAGTCAGTTTGTGTAGATGGTCTTGGGGTTTGGGGCTGCTGACTATATGGGTCAACAGTAGTAGGCCGGGGAGTTCCAGGAGGTTGAGAGTAAGGGTCTGTATTGGACCTAGCTGTTCC
7	151878497	151878617	KMT2C	121	TGAAGATTGGGAATAAGAATCTACAACAGGTCGTGGAGTTCCTGGGGGTTGGGAGTATGGGTCCTGAGATGTTGGCCTTGATATGGTTCCAGGCTGGGAAAAAGCCCTTGAAGGATGGGC
7	151878617	151878737	KMT2C	121	AAAAGATTCATTCACTGCTGGATGTGGGGTAAGGGGAGGCTGACTATATGGATCATTTGACTGATTATGAGAAAAATTATCTATAGGTCTTGGTGTCAAAGCAGGCCTTTCATAAGGGTC
7	151878737	151878857	KMT2C	121	AACAGACAATCGCCTTGATGCCTGTGACACTGATCCATAAGGATCCTGAGAGGATGGAGGAGGTTGCATTGGAGTCTTAAAAGGTCCAGGACCACTATCAAGAGGTGCAGGTGTCAACAA
7	151878857	151878977	KMT2C	121	GGGTCGTGCATATGAGTCAGGTATCCTTTGTCTTTGAAACACATCTGCCCTAGGAGATGGTTTAGTAAAGTGATCACTGGTTCCAGCTGCTATAGGGCCTTTTGCAGTTTGTTCTGAAAC
7	151878977	151879097	KMT2C	121	TACAGGAGACCGGGATAGGCCCAAGGATTTGGGAAATTGATCTGTCATCACAGGCCTAGGTGTGTCTGGAGGTTTTGCATAGGGGTCATTATTTGTCGTGGAAGAAGAACATAAATCTCT
7	151879097	151879217	KMT2C	121	GACAGGGGATGGCCTATTTGCTGTTGTCTCATTCATTTGAAGGGGCCTAGATACCGATGATAAAGGTGTACAGTTTTCCACTGGTGCAGCAGAATTTCTTCTGGAAAAACTATGGCCCAC
7	151879217	151879337	KMT2C	121	AGGAGGTGGTCGAGGGGTACCAACCATTTTTGCATATGGATCCATTGGAGATGGTGGTCGTGAGTTAGAGGACCCAGGTGAAAACACTTGCGGTGAGGGTGGCTGAGAAGTCTGAGCCTG
7	151879337	151879457	KMT2C	121	AGAAAGACTATCCTGGATGGGAATCCGGGATGGGGCTGGAGGAGGAGGTGGAGCTTGTGGCTTTACAAACACATCATCTGAAGATGTAGACGTAGGGGTACTGGGTGGCTGTTTTGTAAA
7	151879457	151879577	KMT2C	121	CAGTTCTTTATGGAATGACTGTGCAGGAGACATATTTCCATTGCCAGGCTGAGGTGTCAAGGGACTCTGTATCCCACTACTTGGTGTATCTGAACCAGACTGCACCAGAAGATGCTGAGA
7	151879577	151879697	KMT2C	121	ACCAAATtgctgttgttgctgctgctgctgctCATTTTTCACCTGTTCAAGTTTCTGTGTGGCTTCAATTTTAGCTTGCTGCTTACTTTTCTGACGCATTTGCTATTAAAATAGAAAAGA
7	151880029	151880149	KMT2C	121	AAAAAGTAGATTATCCAAAAATTCCATACCTGTCTAAATTTCCATTCCTGTTCATGTTCTGATTCTCTTTGCTTTAAAGGATCTTTAAAAAGCTCCGAATCAATACGAGAGCTGGGATCA
7	151880149	151880269	KMT2C	121	ATGCTATCTTGCTGTTGCTGCCTTTTCATGGAATCATTTGACATCTGTACTTTATTAATGCGTAAAGCAGCTCTGTTATCTCTGGCTTTTTGCTTTGACAAAAGAAGAGAAAAAAATTTC
7	151882619	151882739	KMT2C	121	GATAGAGGAGTTTCTTAAAATACCACATATGGTGCTCTTTCTTGTGAGCTTGCTTTTCTCCACAATTTGGCAATTTGCTTCACTCTAGTAGTCCAATCTGCAACAAAAGAACAGAGTATA
7	151884333	151884453	KMT2C	121	ATTCATGGCTTACCAGGGAATTCTTCCTTTAAGTTGGGGAAATTAATATTGGTGTAGAGAACTGGGGCAACAGTTGCCATTTCACCCAGAGCCTCCTCTTTCTCCCACTTAAGCGTGCTT
7	151884453	151884573	KMT2C	121	CTCTGGGCATTCGACATTGTGTCATTTTCTCCTTCCACAGTGGGAGCTGATGATGTCCAAGAGTTGTTAGGATCACTTGCCATTGGATTAAAGGCTGAATTTTTATCCCTGGGAAAAAAT
7	151884745	151884865	KMT2C	121	AAATCAAACAGAAATTAGTGCAATTTAAGTTTCCATAGAAAATAAGGCTTGTACCTGGCATCAGGATAAGAGGATTGTGCAATTGCAGAGAAAGTTCCCAGTCCGCTTCCAGGTGGCAAA
7	151884865	151884985	KMT2C	121	GAATTATGTGGGAGATGAGGACTGGATCCAATAAGGCCATTCATGAGAGGCATCCGTGAAAAAGCATCTTCAGAGAAAAAAATAATTCCGTTGGCATGATATTCACAAGTAACAAGGAGT
7	151891033	151891153	KMT2C	121	GTACCCACATATATACACATGTGTGTGAATATAATGTAGAATTATAAAGTCATAACATACCCTGATTGTGTATTGGCAACAGCTGTGTTGGTGGGGGAGGCTGTGGCAATGGAGTTGGCT
7	151891153	151891273	KMT2C	121	GAGTGTTCGCAGGACTAAGTACAGCTGTAAATAAGTCTTCAACATCTTTTCCGCCAAGCTCTAGGAGATAAAACAATAATAGTAACAAGATTAAAAGACTAGTAGGGTCCTGGTATGGGG
7	151891270	151891390	KMT2C	121	GGGAACGCCATTTTCATTAACTAGAAAATCAAAACACATTTACCTGGAATTTTATATAATTTTCCAAGAATTGCTCCTAGAATAAATTAAAAAAAAAAAAGAAACATTAACAGCTACTAA
7	151891469	151891589	KMT2C	121	AAATCATATTTACTCAGGTCTTTTAGAAAGCCTAGATGTAGGGCAAATATTTTACCATCTGTGACCATTTTGTCTAGTTCAGGACTGAGGATCCCATCTAGCTGTTCTTCACTTAATGGT
7	151891589	151891709	KMT2C	121	CGTGAACTCTGATTGACATTTGGCTGAGGCAAAGAGGAAGGATCATCAGTGACAGGACCAATATCTACAAGAGTAAGGAAAATAAATTTAAAGGTACATTCAGAATACTCACACAAAAAT
7	151892570	151892690	KMT2C	121	TTCTAGTCAGCCGTCATCCATTGCTCAGTTTCTTACCAAATGGAAAAGGTGAGCTCTCAACCTGGAAAGTGCATAAATCAAGACCTATAAGACCCAAACCAAATAAAATGGATGATTACC
7	151892984	151893104	KMT2C	121	TATATACCTGAATGATCAACTGATTTTGCTAGATCATCTGAAATTATTCCAAGAATGTCATCATCTGTGTTTAAAACTTCAGAAATATCAGCTAATGGGTCATCAGCAGGACCTAAATAT
7	151896334	151896454	KMT2C	121	AGAAAATATCTGTGAATAATTCTACATACCGTGAGTTCCAGATTTTGTTGGAGCCGAGGATGAACTAAGTAGTGGATCTAAGGAAGGATCCAAGAAACCTGTGTTCATGTTTGTTTTATA
7	151896454	151896574	KMT2C	121	TAAAAGCTGAGCTCCATCTTCTGACAGATTATCTAAACTTATCTTGCTTTGTCTACTTGTATCTAGAAGATCTTTTCCAAAGAAAGCTTCCTAGATGAAGATAAGCACATACAAAAATGG
7	151899963	151900083	KMT2C	121	CATTTTATTTCCTCAATTAACAAACCATGTAAAATAATGTAAAGCAAAATATTACTTGTAAATAGGCAGGGAAAGTTTCTTCAAGCTTATTTTTCCTTTTTCGGTATCTCTTCTTTATTT
7	151900083	151900203	KMT2C	121	TTTCAGTGCTTTCAGTAACAGAAACAGATTCATCAACTAAAGTATCTGGTAACTGCTCACTCCAGCCTGAAACAACAGTCACATTTATAAATATGTGACATTTAAAATTTCTAGACAAAC
7	151902130	151902250	KMT2C	121	AAATATCAAGACCAAAGGGTTACattaaaaaaaaaatttttttttaaGTCAGTACTATACCATCATCTCTGCAAGGTAACTGCTCGGAAATAGAGCCTGAGGAATCTTTTCTGATCACAG
7	151902250	151902370	KMT2C	121	ATCTTTTGGTTTTCCCTTGCCCAGTTCGACTTCTTTGCCGCACCATAAATCCACCAATACCTATCCAAAAAAGAAATTAGGTAAACTGATAAGTAATTTCTCCCTACATTTCCACAGTAC
7	151904329	151904449	KMT2C	121	TTCTTTAATTAACCAAGTGTTGATGATATTGAAATGTCTACCTCAGGCACTATACCTGGTCTGTATGGTTTCCTTTTTCTCTTTTTGACACCATCTGTTCCTTCCACTCCCTTAGTTTCA
7	151904449	151904569	KMT2C	121	TCATCCACAGCTTCCCGCTCAGGACTAGATTCTGATTTTCCATCACAATCCATAAGTTCTCCTTCTGGAAAAAAGTAAATGTATACACAAAACTGGAAAAACCTATCAAATATATAATCC
7	151917594	151917714	KMT2C	121	AAATTAGTATTACCTCGACTATCATCCATTTCACCATCCCTTGAATGCTCTGATTGGATGTCTGGAGGGGTCTGAAGGACGGCCACGCTATTCTGATTTATAATCTTCAATTTCAATTTT
7	151917714	151917834	KMT2C	121	GGTTTTGACCGTTTTCTTCTTGGAACTGTAACTGTGAGGCTCTGTAACTGAGTCATCCCTGATTCAGTCAAACACACACCATCCTGGGTATAAGTCTTGGGTGGGTCTAAAATTACAAAA
7	151919058	151919178	KMT2C	121	AATCAAGTAAAGCATTTCAAATTTTACCTAGCTCTTTTACTTTTGTGACAATTTGTGCTACAAGTGAAGATTCACAGCAGTCTGAGGAAGGCACTGAAACGAAAAAAAAAAATCCAGGTA
7	151919652	151919772	KMT2C	121	CTTACCATTAGACGCAGGCATATAGGGTCTGCACATGCTACAATCAAAACCAATGTCTGCTACATTTTCCACTTCTTCCTCAGTATTTAAGTTCTGACAAACTGCATGCATCCATCTAAA
7	151921062	151921182	KMT2C	121	AGAAAAGCTTTAAAAAGATGAAAAAATAGCACAATACCTATCACATTGTCTACATTGCAGAATAAGATCTTCTTCTCTATAGTTTCGATAGCAGACTGGACAGGAAGATAAGCTTGCACA
7	151921182	151921302	KMT2C	121	AGGAGCGCACTGTGTGTAATTGTTCTGCCATTCACATCTTAGACCTGCAGATGTTGCTCCACAGTGTCTGCACCAAACACACCTGAAATCCAAATCCCCCCGAAAAGTCTCAATTTTATT
7	151921490	151921610	KMT2C	121	ACTAACAAGGCAAACAAACCCTAGAGTACCATTTGCACTTCCAGCCTCCTTTGGGAACTGTCTGCAATGGAGGGTCTAGGCAGTAGGTGTGATAACTTATGTCACAGTCATCACACAGCA
7	151921610	151921730	KMT2C	121	GGAGTCTTCCTGGGTCAGTTGCCTTCCCACAGGCCTCACACACAGTGCACTCAAGACACCTCCAACCTTTGCTAAGAACCACTTTAGTGATCTGTAAAAGAAACAACCAATCCATGTGAT
7	151927000	151927120	KMT2C	121	TGTTTACCTTAATACTGACACAGTATGGATGGTAACACTGACCACACTGAGAACAGGCAAGTAATCTTCCTTCTGCTCCTTGGCCAAAACTGCCACAAACTACACACATATCCTGAAGTT
7	151927295	151927415	KMT2C	121	AGTTCAAACCTGATTCAAAGTGAACTTGTCACTGCTAGAAAACAACACAACTGTATTGTGCATAGAGTTTTCTTCATCATCCTTATTTGATGAAATATCTGCAGTAGACACCTATAAAAA
7	151932900	151933020	KMT2C	121	CCCCAGGTAATACAACAGCTCCGATTCCACTTTTCAGCTTTGACCTGCCTCGGCCACCTCGCCCCGACAGTCCTGCACCTCGAGGTCTCCGCTTTCCTGGAAATCCAGACCCACGGCCCT
7	151935731	151935851	KMT2C	121	CAGTAGGGCAAAACAAATCAGACAGAAATGATATATGAATGTAAATGCAATTTTATTTACCACTTTGATGCTCCAAATGGCACTGCCAGGAAGCTGCCTGGGTTTAAAAATTTCCCGACC
7	151935851	151935971	KMT2C	121	TTCTGAAATGTCTGGGGACCAGGAAGGTGGGCTCACTGTATTATGGGTACTCCAAGCCCCCTAGGATATGGCAGTTGAGAAAATAGATGTGTAAAACTCAGCAACATAAAAGGTCAAAGC
7	151944985	151945105	KMT2C	121	CCTGTTTGGACCGAGGTCTACCAGGAGAAAATTTTCTCTTAGTAATAGCTGGTTTACCCATGCCAATTTTTGGAGTGACTGAGATGTAAGTTGTTGGCATGATGTTTCCAGCAGAGGAAC
7	151945105	151945225	KMT2C	121	TAAGAGCTGAAGGGTAATTATGCAGCATGTCATGCGAAGGCAAGTCTGAAGAAGGTGTTGGGGAGGAAGACACATCTGCCTTGCTTATGTCTGCTGATGATGAAAATGATGACTCTGTCT
7	151945225	151945345	KMT2C	121	CAGATGATAACTTTATAGATTTGCCTCCTTGGTATGAAACATCTTTCACACAACCCTCAATTGTAGGAGTCATTTCAGAGTCCATCAATCCAGTAGAAAGTTCAGAATTTTCTTTCTGTT
7	151945345	151945465	KMT2C	121	CCTTTTCTCCTTGTAGCCTTTCTATAACCAACTGTTCCTCAGGACATAATGAAATACTTTCCTCATGTGGGGACACTAAGGTTTCTAGTGGAAGAGTGACAGATTCCATGACTAATTTTG
7	151945465	151945585	KMT2C	121	GAGGCCTTGATTCTTCTCTGGATACCACTGTTTCAGGTTCCTCTAACAACTGCAGTTGTTCTTGCTGCACAGTGATCTGGTGTGTAACGACTTCAATGTTTTCTGTCACTTCCATTTTAT
7	151945585	151945705	KMT2C	121	CTTCAATTTGATCTTCGCCACAAATATGCTTCACTTCAGAAGACATTTTCAGGTCTTCACTATCAACTTCATTAGAAATCTGTTTTTCCAATTCAGTATTCACTGTATGTTGGGATGATA
7	151946939	151947059	KMT2C	121	CAATATGAACATACTGCTTACCAGCAATAAGAAGACTATCTGTGTCAAGACTTTCTGAGGGATGACTCTTCTGTTGCTCTTCAGTGTGGACTTGAACCGCTGTGAGTAACACATTTATAA
7	151947934	151948054	KMT2C	121	TACCATCTGGAACAATTCCAGGAGTGGACTCCTGACCGTTGACATCTTTATTAGCTGCCTGCTCTGAGAATACCATTTGATCTTCAGGGCCTTCAACTTCCATTTCATTGTTATAATCTT
7	151948979	151949099	KMT2C	121	TTACAAAAACAAAAAATTTAAAAAAAAATCATTCTCAAATTTACCTGTAGTGAGCTCAGCTATCTCCACTTCCTCACCTGGCTGTAAACGATCCATCTCAGCTCCCAGGTGTTTACAATA
7	151949099	151949219	KMT2C	121	CATGCAGATATACTCTTCTTTGAGCTGAGTATCCAGTTCATGATCTGTTGGTTTGTCACACTCTAGGTGAACCCACCTGCAGTGATAAGTATACTTAAATAAAAATTTCTAACATCGAGT
7	151949595	151949715	KMT2C	121	GACAAAACAACTGAATAGAATAACTATCTTCTTACCTTTTGCACATATTACAATGAAGCATGTCTTTCTGCAATTCTGGATGATAACACTTCCCACAGAAGGGACATAAGTTATCCTGCT
7	151949715	151949835	KMT2C	121	GTTGGTAACAATTGTCACATATCAGGCAATTGTGGTGCCACTGAGAACTAGACCGTGTGCCACACTCTATACATATTCTGCAATTCTAAACACCAGGAAAAATAAAAACAAAAACAGTTT
7	151960097	151960217	KMT2C	121	TACTTTGCATTTCCAGCCATTGGTTGGTACTGATTTCATAACTGGTTGAAGACAAAAAGTATGATACCCTTTGTCACACGTATCACACACTAGCATCTTGCTATCTTCTCCCGATTGTCT
7	151962088	151962208	KMT2C	121	CAATACACAGCTTTGAATTGAAATGAAAACTTACTTGCAGTTCTGGCACACTTTGCACTCAGGACATTGCCAACCTGCACGTTTTAATGGAGTAACCGCTATATCCAGGCACATTCCATG
7	151962208	151962328	KMT2C	121	ATAGTGCTGACCACAAGTAGTACAAAAGAACTGATCTAAGAGGTCTCCCGGGCTGTCGCACACTGCACAGTTTGCATCTTCCTTCGCTATAATTAACAGTGAAACAATGAAATTGTTGTA
7	151970750	151970870	KMT2C	121	ATTGGTTGAAGTTTAAAAGTCTATCCGTAGTAAACTTACATCTTTCAGGAGCTTGGTCAATGTGTTCTGGACAAAGCAGGAAGATGTGACTGAAATCCTGAAAGGTGCCGGCTCCTGCAG
7	151970870	151970990	KMT2C	121	CACAAGGATAATGATACATCTGGGTACATTTCTCTTCACAGCATTTGATAGTGGCTCCAAGGTGCTTACAAAATGCACATCGCTGAAAGGGGTAAAGGAGAGAAATCTCTTTATAAAACC
7	152007045	152007165	KMT2C	121	CTTACTTCTGTGCTCCCTGAGACAACAGCTTTGTCCACGTTCACTAACAATGGTTCTTCCATCTGGCATACTCCTAGTGACCACTCCACACAACGGTGATGAGCCCAACAAGTGCCTAAA
7	152008837	152008957	KMT2C	121	GCTTCCAGAATTAAGAGGCAGTCATTATTGAAAACATGCCCATACCTGTAGAATCAAATAAGGCTTGGATATCAATGGCATCTGGAAGCCCAACCAGACTGAGTTCATCCCACAGTTTAC
7	152008957	152009077	KMT2C	121	CAGCTTGATCATCTGAAGCTGTCTGGGTGCTTACACTTACACAAGATACTATATTCTGCTGAGGAGATCGTTCTCTGAAAATAAAATAAAATAACTGTGAAAGTGAAAACAAGCAGAAAA
7	152012203	152012323	KMT2C	121	TAAAGTCGAAACTGCTTACTTTCTCTGTCCTCTTTGTTTTCGTGGTGCTGAGTTTTGCATTTTCTCATAGGTTCCATTGCTGTTGTCATCAATGTCCTTCTTGTTAGAAGGTTGGTTTCT
7	152012323	152012443	KMT2C	121	CCATGGCAAGATAAATCCAGGCGTTATTCTGAATTGTTTTAAGTCTCCTTGTCCTAAGGAACTTTTTTCCCCACAGTAACAAAAAGCGCAGAGCTGTTCACTAGTAAAAATGAAATGTAA
7	152027636	152027756	KMT2C	121	GCTTTATTCCTGTCACTAATATCCAATCCAGCTGCATTCATTCTCTAACCTGATTTTGGCTTCTACACCAACAGAGACCAGGGAGTTTGCCGATTCCTCAGACACAGATCGCTGAAGAGT
7	152027756	152027876	KMT2C	121	TGGAATTAGCTGTTTGCTGTTATCCACTTCTGCTTCAGCATCCTCTTCTGCAGATTGTTCTTTGATTTCTGCTTAACAGTAAACAAGAGAAAACAAAGAGTCATTTTTGTGTTTATTTTA
7	152055656	152055776	KMT2C	121	CTTGAGTTCTGATACCTGTTTCCACAATCGTTTCTGTTTCTGTTGTCTCCAGCCCATCCATGCTGTCCTCATCTTCCACTGCAGTTTTCCCCCTACTTCGAGGTCTACAGAAAAAAAAAA
7	152132675	152132795	KMT2C	121	TGGCTCCCGGCCTGGCTCCCTCGCACTCAACTTACTTCTTTCTGGCTCTCTGGAAAGGGGAAGCGCCATCTTTGCGAGGCCGGCCCCGAGGTCTTTTGTCTGCGGCTGCGGGGCTCGGGG
7	152132821	152132940	KMT2C	120	GGTGGCGGCGGCTGCGGCTGCTCCACGCTCTTGTCCTCCTCCGACGACATCCTAGTCACCAGGAAAGACACATGGATCCCGGTCCTCCTCCTGGGGGGCTCccgccgccgcggccgccg
8	2820716	2820830	CSMD1	115	CGGAACAAATTCTGCTGTAGAACTTACGGAGACACTGGGGGATCTCTCCTTTCCACACCCCGCGACCTTCACAGGAGAGGATGGCGGAGTGAGAGAGCTGGTAACCGTCCATGC
8	2820830	2820950	CSMD1	121	AGCTGTAACTTATGCTGGAGCCCCAGCGGAAATCACTTCCCTCCACTGTTCCATTCTGCACCGGCGGCGGCTGAGGACACAGCACGGCTATTTCCAAAGAACAAACAAGATCAACATTCC
8	3008917	3009037	CSMD1	121	CCATAGCCGATGGGTAATGAGATCCTCCAGGTGCAGTCTAAGTTGTTGGGGTAAGAACCTGGGAAGCCGGGGCTCAGGATCACACCACCCAAGGTGCTCAGCGTCCCTCCACAGGTTGCT
8	3087537	3087657	CSMD1	121	TTTCTAAGTTCTGTTGTCTGATACCTATGCATGTAGGAGGGTCTGGTTGCCAAAAGAACCGGTTATTCAGCTGCACACAGGTGATTTTGGCTTGTCCTTGGAGCTGATAGCCAGGGTCAC
8	3087657	3087733	CSMD1	77	ACTGGAATGTGACGGTGTCTCCAGCCTCTCTGCTGTCTCCATAGCGGGTGCCATTTTGGGGCATACCTGGATCGTT
8	3224541	3224661	CSMD1	121	AGACCAACATACCTGAAAATGTGATATTGAAGCCCTCGTACGAAATTGAGAAGTCTGATATAAACCGAAGCTGGGCAGTGAAGTTTCCAAACAGGCCTGCCTTGATCGTATGAGGCAACA
8	3224661	3224781	CSMD1	121	CCGACCCGGTGAGCCTGGCAACGGGCTCGGAAAAACTTCCATCCTCTGTGATCAGTAAATAGTCGTGGGAACTCTCAAGATGAAAGGTGTGAAAGATCATTTGAACTCCTGAGAAATGAA
8	38271114	38271234	FGFR1	121	GTGGAGTCTGGGGAGGGCGTGTGGGTGGCAGTCAGCGGCGTTTGAGTCCGCCATTGGCAAGCTGGGCTGGGTGTCGGGGCAGGCAGGGCTCCTCGGGCAGCGGCTCATGAGAGAAGACGG
8	38271234	38271354	FGFR1	121	AATCCTCCCCTGAGGAGCACGTAGAGCTCCGGGTGTCGGGAAAGCTGGGGGAGTACTGGTCCAGGGGCATGGACAGGTCCAGGTACTCCTGTGATGGGCGAGAGGAAGCAGCGATGGGCC
8	38271428	38271548	FGFR1	121	GCCTTACCTGGTTGGAGGTCAAGGCCACGATGCGGTCCAGGTCTTCCACCAGCTGCTTGAAGGTGGGTCTCTGTGAGGGCACTGCATGCCAGCAGTCCCGCATCATCATGTACCTGCGGC
8	38271618	38271738	FGFR1	121	ACTCTTGCCCCAAGGCCTGGCTCAGGGCCTCCGACATCTCCTCGGGCTTACAGCTCGTTGGTGCAGTTACTGGGCTTGTCCATGCGGTGACCCTCCTTCAGCAGCTTGAAAAGTTCCTCC
8	38271738	38271858	FGFR1	121	ACAGGCACACCGGGGTATGGGGAGCCGCCCAGAGTGAAGATCTCCCACAGGAGCACCCCGAAAGACCACCTGCAAATGGGCGGAGAGCCACAGGGTGTTAGAGCTTCTCCGCCTCCCCTC
8	38272051	38272171	FGFR1	121	CTGGCAATTGCTATTACAAACTCACACATCACTCTGGTGGGTGTAGATCCGGTCAAATAATGCCTCGGGTGCCATCCACTTCACAGGCAGTCGGCCCTGAAAGCAGCACAGGGGAGGTTG
8	38272202	38272322	FGFR1	121	GGTGGGAAGGGACTGGGGGGTGGGTTCTCAGCCCACCCCACTCCTTGCTTCTCAGATGAAACCACCAGCACAGGGCGGCCTTGTCGGCACTCACGTTGGTTGTCTTTTTATAGTAGTCGA
8	38272322	38272442	FGFR1	121	TGTGGTGAATGTCCCGTGCGAGGCCAAAGTCTGCTATCTTCATCACATTGTCCTCTGTCACCAGGACATTCCTGGCTGCCAGGTCTCGGTGTATGCACTGAggaaggaggaagggagagc
8	38273362	38273482	FGFR1	121	CCAGGGGAGCCTTCAGGTTCCACACCTTCTTGGAGGCCAGATACTCCATGCCTCGGGCCACCTGGTAGGCGCAGGACACCAGGTCCTTGGAGGAGAGCTGCTCCTCTGGGTTGTGGCTGG
8	38273482	38273602	FGFR1	121	GGTTGTAGCAGTATTCCAGCCCTGGGGGCCTCCGGGCCTGCAGGTACTCCCGCAGGTTGCCCTTGGAGGCATACTCCACGATGACATACAAGGGACCTGCAGGCACAGGAGAAGAGGCCA
8	38274818	38274938	FGFR1	121	CCCACCATCCTGCGTGCAGGCCCCCAGCAGGTTGATGATATTCTTATGCTTCCCGATCATCTTCATCATCTCCATTTCTGAGATCAGGTCTGACAAGTCTTTCTCTGTTGCGTCCGCTTT
8	38275328	38275448	FGFR1	121	CCTGCTGTTTGCTTGGAATGGGACAAGATTTTCTTTGCAAGGACAGAAGCATCACTTACACTTCAACATCTTCACAGCCACTTTGGTCACACGGTTGGGTTTGTCCTTGTCCAGCCCGAT
8	38275448	38275568	FGFR1	121	AGCCTCTGCCAACACCACCTGCCCAAAGCAGCCCTCTCCCAGGGGTTTGCCTAAGACCAGTCTTTCGGGGGAAACAGAGAGTGGCATAAGTTGGGGCTGGTGAAGTTCAAACCTTGAGAG
8	38275698	38275818	FGFR1	121	GCAAGCAAGGAATGCCTTCAAAAAGTTGGGAGTCAAAGTATTATTACCTGTCCCGAGGCAGCTCCCAGCGAGGGTCTTCGGGAAGCTCATACTCAGAGACCCCTGCTAGCATGGGAGTCC
8	38275818	38275938	FGFR1	121	CACTGGAGGAGAGCCGTGATGGCCGAACCAGAAGAACCCCAGAGTTCATGGATGCACTGGAGTCAGCAGACACCTGCAAGGAAGAGTGGGGTCACCCTAGAGCAAGGAGGGGGGACGGGG
8	38277031	38277151	FGFR1	121	AAATCCCCCATCTACTTTCTGTTACCTGTCTGCGCAGAGGGATGCTCTTGGCCAGCTTGTGCACAGCCATCTGGCTGTGGAAGTCACTCTTCTTGGTACCACTCTTCATCTTGTAGACGA
8	38277151	38277271	FGFR1	121	TGACCGACCCCACCATGCAGGAGATGAGGAAGGCCCCTGTGCAATAGATGATGATCTCCAGGTACAGGGGCGAGGTCATCACTGCCGGCCTCTCTTCCAGGGCTGAGTCAGTGCGAACAG
8	38279267	38279387	FGFR1	121	GCCCGTGGCGAGGGCAGGACATCGAGAGGAGAAGTTACAGTGTGTACCTTCCAGAACGGTCAACCATGCAGAGTGATGGGAGAGTCCGATAGAGTTACCCGCCAAGCACGTATACTCCCC
8	38279387	38279507	FGFR1	121	TGCGTCCTCAAAGGAGACATTTCTTAAGTGAAGCACCTCCATCTCTTTGTCGGTGGTATTAACTCCAGCAGTCTAGAAGAGACAACGGAAGCAAAATGGACAAGCACAGGACATGAGACC
8	38282001	38282121	FGFR1	121	CCACGAAGACTGGTGCCATGATTACCTTCAAGATCTGGACATAAGGCAGGTTGTCTGGGCCAATCTTGCTCCCATTCACCTCGATGTGCTTTAGCCACTGGATGTGCGGCTGCGGGTCAC
8	38282121	38282241	FGFR1	121	TGTACACCTTACACATGAACTCCACGTTGCTACCCAGGGCCACTGTTTTGTTGGCGGGCAACCCTGCTTGCAGGATGGGCCGGTGAGGGGACCGCTCTGTGGAAGATGGGAGAGGAGGCA
8	38283581	38283701	FGFR1	121	TCTCCAAGCCTGGCTCTTCCCACTAAACTCATTCCTCCTGCTGCCTCTGCCCTCTTACCCACGACATCCAGCTGGTATGTGTGGTTGATGCTGCCGTACTCATTCTCCACAATGCAGGTG
8	38283701	38283821	FGFR1	121	TAGTTGCCCTTGTCAGAGGGCACCACAGAGTCCATTATGATGCTCCAGGTGGCATAACGGACCTGAGGGGAAATGCCAAAGGGATACATTGAGGGTCCAGAGGAAAATGCAGGCCCCATG
8	38285405	38285525	FGFR1	121	ATTACTCTAACTTTCGCATGCACACACACGTACCTTGTAGCCTCCAATTCTGTGGTCAGGTTTGAATTCTTTGCCATTTTTCAACCAGCGCAGTGTGGGGTTTGGGGTCCCACTGGAAGG
8	38285525	38285645	FGFR1	121	GCATTTGAACTTCACTGTCTTGGCAGCCGGCACTGCATGCAATTTCTTTTCCATCTTTTCTGGGGATGTCCAATATGGAGCTACGGCTGCCCGGGGAAAGCCAAGAGAGACAGGCAGGGT
8	38285848	38285968	FGFR1	121	GAAACAGTGTCTCACGCATACGGTTTGGTTTGGTGTTATCTGTTTCTTTCTCCTCTGAAGAGGAGtcatcatcatcatcatcatcCTCCGAGGAGGGGAGAGCATCTATGGGAAGAAGAA
8	38287146	38287266	FGFR1	121	GGGCTGGAGGGGGTGGGTCTAGGGAGGGGCAAGGGCAGGGCTTGGCTACCAACCTGAAACATTGACGGAGAAGTAGGTGGTGTCACTGCCCGAGGGGCTGCTGGTTACGCAAGCATAGAG
8	38287266	38287386	FGFR1	121	GCCGGAGTCTGCGGGCACGGAGTCCTGCACCTCCACCTCCTCCCCTGTGATGCGGGTGCGGTTGCTTTCCGCCAGCTGCACCCCGTCCCGCAGCCAGTTGATGCTCTGCACATCGTCCCG
8	38287386	38287506	FGFR1	121	CAGCCGACAGCGAAGCTGCAGCAGGTCACCGGGGTGGACCAGGAAGGACTCCACTTCCACAGGGGCTCCCCAGGGCTGGGCTGCAGCCACCACggggccgggaagggaagccaaggggcg
8	38297797	38297917	FGFR1	121	GCTTTGAAATGGAACTGAAAACTTACCTTCGGCTGGCAGGACCCGGCCAGAGTGCAGAAGCATCTCACCGAAATCCCGGGTCACAGCTGCCATCCTACAAGGGTTTGGGTGGAGAGAGCC
8	38314842	38314962	FGFR1	121	GAGTCCAGGCTGCCCCCAGCCAGCACCTTACCTTGTTCAGGCAAGGTCGGGGACGGCCTAGCGGTGCAGAGTGTGGCTGTGACCAGCACAGCCCAGAAGAGGAGGCACTTCCAGCTCCAC
8	38314962	38315082	FGFR1	121	ATCCCAGTTCTGCAGTTAGAGGTTGGTGACAAGGCTCCACATCTCCATGGATACTCCACAGTGAGCTCGATCCTCCTTTTCAAACTGACCCTGAGGAAAGGAAAAAAACCCCAAAAGTTA
8	38318558	38318678	FGFR1	121	CAGAGAGGGGGCACATctcagtttcccactcatcagagggggctgaaatacttgccttgcctccatcacaggtggttatgaagactgaatgggctgcatgggtgaaagtgcctGCTGTCT
8	113236959	113237079	CSMD3	121	GTCGATTTCCAAGCTTCTGAAGAAGGCAAAGGTTGCCTCGTTATACCATTGTGCAAACCGTGTTCAAGTTGGGATCAAATCGTACCGCCTTCCCTTCCACTGACTTTGCGTTGGTGTCAT
8	113237079	113237199	CSMD3	121	ACATGGGATTTTCAAAAGCTGCTTGGCCATTGTTATTTTCATGAACTGAACATCCTGTATACTGTGTTTTAGGTGCAGTCCTGTTGATGAGAACATTGATTAGCTATGTGTTAACTTTCT
8	113240907	113241027	CSMD3	121	ATTTGAGCTAGAGCAGTAGAAATAACATGAAAAACAGATTTGGGAAACATTTTGTAGTTAAAAATCAATGAGCTTACCTTTGTTTATAAAGATAAAATCCAAATCCTGCAAATATAAGTG
8	113241027	113241147	CSMD3	121	CAAAAAAAGGCACAAGAATAGCAATGGCTACAGAACTACTATTTGTACCATGAGGTTGATTTGAAGAATTTGAACCTTCTGACATATTCAGTCCTACaaaataaaaaataaattataaat
8	113243757	113243877	CSMD3	121	AAAATGAATACATTACCCAGTCTTTGTAGGCCAAATTGTCCATAATCTTTGCCTTGAATAAATCCTTGAAATACATAAGTAGCTCCATCAGGCTCAGCAGAAACCTAAAAATATTTAAAC
8	113246590	113246710	CSMD3	121	TACAAAGCCATCCATTGCCCAATTTTCTTCCTTCATTTTCTTCACAGAAGCATGAGCAGGTACTTTAATAAGATATATGCGTAACATTAGGCGAGCTTCCTGGCTTTTATATACCCCTGT
8	113249377	113249497	CSMD3	121	AGTCATGAAGGTATATTTCGCTGCTGTTTTTATTGCGATACCTGAAAGTAGCAGCTCCATGTTGCTATTGCTCAGTGTTGCGTTAACTCTCCCAGTGGAAGCATTGAAACTAGTAACTGT
8	113249497	113249617	CSMD3	121	TAAGGTCATGGGTTGTTTCCTTCCTTTGAAATTGTAAGAGCCTTTCCATATATAATTTTGGGCAAATACATCATCAGGAACTGTGAATAGATTAAATATACCACACATTAATTTTACAAT
8	113253921	113254041	CSMD3	121	TCTAGAAAAACAAATGACATTACTAACCACTTAGCTTTGGGCTGGGTGTTCCCAGTGCAGGTCTAGGATCTTTCACCAATATTTTAGAACCAGCTATGAAAAGAAATAAAGGTGTTTACA
8	113256592	113256712	CSMD3	121	TGTTAAAAAGATTCTATAGAGAAAACTTACCTTCACAAATGGGAACTTTTCCAGTCCAGGTGTTATCGGATCTACACACTCTATGTTCTGTTCCACCTGCTAAGAAGAAGCCAGGCTGAC
8	113256712	113256832	CSMD3	121	AGGTATAAATCAGTGTATACCCATGAGATGGAAGGTCCATCCCTACGACATTTGCATGAGCAGGAGTTTCTGGCTGTTTACAGCTGTGGGCTATATTAAGAAAAGAGAACAATGTAAATT
8	113259244	113259364	CSMD3	121	TTACGTATGCATTCAGGCTGAATCCCACTCCACGTAAGATCAGGGAGGCAGGTGCGTGTTGTAGACCCTTGGAGAAGGTGTCCTTTTTTGCAATGGAACTGTACAACACTTCCTACCTAT
8	113266458	113266578	CSMD3	121	ATGGACATAGCTAAAGTACCCACTTGAAATCCGAATGTATTGTTCTGAGATCCATGCCGAGGCACACCTGGGTTTTCACAAGAGGTTTGGGTAGGCTCTAAAATGAAGATTAAAAAGATA
8	113267449	113267569	CSMD3	121	TACTGTGCATAATCAGCCTTTAATTAATATTACCTATGCAGTGAGGTGATGAACCACTCCAAGTGCCATCTGCTTGACATATTCTGGTGCTTGATCCCACTAATATGAAAGGAAAATTGC
8	113267569	113267689	CSMD3	121	AGCTGAATGAAACCTCTGACTGGTATATAAAGCTTTTGCCTTCTCTTTTTCCTTGGGCAGGTATACCAGGGTCACCACAAAACTTTGCTGGAAATGAAAAGAAAGACGCTTATATCAAAG
8	113275834	113275954	CSMD3	121	TAAGTAACAGTTGTTAGTAGAAATCATACTTACGTAAGCACTGCGGTACTTCACCACTCCAGGTACCATTCCCTACACAGGTCAAAACAGCAGGGAAGGATAGCTCATAGCCTGGAGAAC
8	113275954	113276074	CSMD3	121	AGATGTAGCTAATACTAAAGCCCCAGTCGAAATTTGTTCCTTCCAGCCTTCCATTAGAGATCTGGGGAGGAGTTGGGCAGGTAACAGCTGCAATTACATTAAAAGTGATTAGACACAGCT
8	113277609	113277729	CSMD3	121	TTTTAAATGTTGAAGAAATCATTATCATACCTCTACAAGTTGGCATTACTCCACTCCATGTGCCATTAATTGTACAAGTCCTGATTCTGGAGCCATTCAATTCCATCGTGTAGCCTGGCT
8	113277729	113277849	CSMD3	121	GGCACATGTAAGAAACATTTTGTCCAACCACATAATCATCTCCATATCTCAGTCCATTGGCTGGTATACCTGGGTCTCCACAACTGATTACTGTCAGTATTGGATTAGAAGAGCAGATGG
8	113293371	113293491	CSMD3	121	ACTGATTTTTAAATATTGAGAATATACTTACTTGTACAGTTAGGTAAAGTTCCAGACCATGTTCCATTGGCTGTGCACTGTCTAACTGAAGGTCCAGAAAGGATGTATCCCTCCATGCAG
8	113293491	113293611	CSMD3	121	GAATAAATGACTGAACTAGAAAATGTTGTGCCATCAATTCGGAAGACTTTCCCATTGGCTGTGGTTCCTGGGTTACCACACTGCACAGCTATAAAACAAAGTGTTTAAGAGTATATATAA
8	113299263	113299383	CSMD3	121	CAATATATTTAATTTCTGCTTGAGATTACCTTTGCACTCTGGCTGCCTTCCGGTCCAACTGCCATTAGCTAAACATGTTCTTTCTTCTGAGCCATGAAGGATGTAACCAGTATCACAAGC
8	113299383	113299503	CSMD3	121	ATAACGTACAGTACTTTTAGTTCTGAAATTGCTTTCCTGTCTAGAGCCATGGCCGGGAGTACCTGGATCGCCACATGTCCCAGTAGCATCACCTGCAATGCAGTACAGTTCAAGTTAACC
8	113301560	113301680	CSMD3	121	CCAACACATATTGTCCAATTTTCCAAGTGGTACCTGAACAATGAGGTTGTGATCCACTCCAATGGCCATTCAATTGGCAGGTTCTTGATGACTGGCCTAAAAGGGAACGCTTTCCTGTGC
8	113301680	113301800	CSMD3	121	AGGAATAGTGAACAGTAGACCCAAAAGTATACTTCTCGCCAGACAGGACTGCATTAGGAGGAACGCCAGGGTGTCCACAGTCAATCACTACAATACataattattaaatataaaattttt
8	113303711	113303831	CSMD3	121	AAGAAACAATTCACATTATCTACTTACTGATACATTCTGGTAAAGGTTTGTCCCATTGTCCATTTGGTTGACATATCAAAACTGAAGATCCAAATAAAAAATATCCAGGATTGCAGTCAT
8	113303831	113303951	CSMD3	121	AGAATACCACAGTGCCGTAAGTAAAATTTCCATGTTCTATTTTACTTTCTCTTTTAGAATTGGCTGGAATTCCAGGATCAGAACAGTTGACCACTAAACAAATGACAAATTTTGAAACAT
8	113304732	113304852	CSMD3	121	TGCCACCAAATGGGAATATACTTAGACATTTACCTTTGCACATAGGTGGAGGATGGCTCCACTGTCTGTTGGCCTGGCACTGTGCCTTTGTTGGCCCTTGCATAAGATACCCAATATTGC
8	113304852	113304972	CSMD3	121	ATGAGAATGTTACCACATCATTAAAGTTGAACCCATTTCCACTTGTTCTTCCATAAATTGGACTACCAGGGTGACCACAGCTAACAGCTAATAAGATGTGGCAGGAGGACAGGGAAGGAA
8	113308028	113308148	CSMD3	121	AGGTCTCTAATTGCTTTTGCCATGCTTACTTACGCACACAGGATGGGAGCTGACCAGACCAATTGTGATCCTGTTGACATATCCTCACTGAAGAACCAATCAATCGAAAACCAGGATTAC
8	113308148	113308268	CSMD3	121	ATTGATATACAACTGTGTCTCTATATCCATAATTTTCTCCAATGACTTGACCATTCACAATCAGTTCTGGAATTCCACAATGACCCGCTGAAATACGTTATAAAGTAATATTTTTAATAC
8	113313988	113314108	CSMD3	121	GAAGTTTGACAAAAACAAATTAAAAATCTGTACCTAGGCATCTGGTTTCAGATTCACTCCAAAGACCTGAGGAAAGGCATTCCCTTACAGCAGAGCCCACAAGCATGAATCCCAAGTCGC
8	113314108	113314228	CSMD3	121	AGGTAAAGATAGCTGTTGAGCCATATGAAGTTTGAGTTCCAATCTTATTTCCATTTGGAGGTGTAGGTAGTTCTCCACAGGAAATAACTTTAAAATGATAAATAAATAAAAATCCTTAAA
8	113316926	113317046	CSMD3	121	AGTTTAGCAGAGTGTATACTTACTTTGGCAATATGGTCTTTCATTTCTCCAACTCCAAGTACCATTAGGAAGACATTCGATGGAGGCAGGACCTAGTCCATGATAACCAGGGTCACAGCT
8	113317046	113317166	CSMD3	121	GAAAACTACTTTGGTTTTGTATTCATAATGGGAGCCATTCACAATTCGCCATCTTCCATGTTCCAAGATAAAGGAATTGATGCTTGGACATGTAACAACTATACAAAAACCAAAGGGTGT
8	113318208	113318328	CSMD3	121	GTGATGAAATTCCCTTGACACACATACCAACACAGCGAGGGGTCTTGTTATGATTGCTCCATGTTCCATCTGATTGGCATACAGCTGTAGTGAGTTCTTTGGATGACAATCGATATCCAT
8	113318328	113318448	CSMD3	121	CATTACAAAAATAGGTAACTCGCGTTCCTACCAAATAGTCTGTTGTTAGTATTCCTCCATTTGTTGGAGCTTTAGGAATCCCACAGGAAATTGCTAGAAAAACATACACACAAGCAAAAT
8	113323181	113323301	CSMD3	121	TTCATTTTGGCATAATATACTTCACCTTGACAGGCAGGGACTGGCGCATCCCATGCATGATACCCATAGGAAGACTTTCTGCACACAGCACTGCTTTTTCCAACAAGTCGGAATCCTCGA
8	113323301	113323421	CSMD3	121	TCACAGGCCCAACGGACCACACTGTTAAGCTGCCCACCTGTCTGACTGATAATATATCCATGAGGTGGGGATTCTGGTGTACTACAGTAGAAAGCTTTTCAAAAGAAAAAAAAAATGCTG
8	113326087	113326207	CSMD3	121	CCGAAGATGATAGTGAGATCTGTCCTGAAGTTATAAGTTTTACATACCTATATATCTTATCCGGAAGCCTTTTTTGTTATTGCCATGATCTGCTGACCACTGAAGAAATACTTCATGACC
8	113326207	113326327	CSMD3	121	ATTGCTTGTTATATTAAAAGCAGATGAATAATCCCCACTGAGGGAAATAAGCACTGGACTTTGAATATTTGGTCCTTTGGGAAGAAAATAAAACAATTTAGATAAAGCTAATTATATTCT
8	113326632	113326752	CSMD3	121	TCCAATAAATATAACCCTTGGTTACCATCATACACCTGAAGAACATCAAATTCCTTTTCTGTCTGGAAGAATTCTACAAACATGGTGATATTATAACCCTTTTCCACTGAAATGCTCCAT
8	113326752	113326872	CSMD3	121	GCACACATTTGAAGATTTGGGTAACTGTCAGGATATCCAGGGCTCAATATGACTCCAGTAGAATCTAGCCGTAATTCATTGGCAGGACAGAGCACTGTCAAAGAAAAATGTCATTAAATA
8	113331062	113331182	CSMD3	121	TACCTTGACAAACTGGAGGTGCTCCATCCATCTGCAGTCGTTCTCCTAATCTGCACGTCAGAATTGCATTACCAACTAAAGTAAATCCTGGAAGACACTGATACCTAATAATATCACCTA
8	113332110	113332230	CSMD3	121	AATAATTTAACAGCTTTACCTATTTCAAATTCATCATCTTCCGTCAAAATTTCAGCATTGGGCACAGGTGGTGGAGGTTGGCACACCCTTAGTTGATAGGCTACAAAAATAAACAAAGTG
8	113347510	113347630	CSMD3	121	AAATTAAACAGTAGCAAATGAAATAGGAACTCTCAGATAATACCAACCGTGATAACTGAGCACAAAAAAGCCACTTGTTGTGAAATCACTGTGGAATTTGATTAGAATCTGATTTGAAGT
8	113347630	113347750	CSMD3	121	ACTGTAGACTGATTCCAAAGCGGTATTGCCACTGAACTGACCGATCTGAGGTGAATTTTGGTCTGGTCCATCCCTATGAGACAAGGATTGGGAAAGGAGGAGAGATCAAGATTGATTGTG
8	113348849	113348969	CSMD3	121	GAATAAATCAATAACAATAGTCCTGACTTACCATACAGTAATGAAATCATATATTGGTTCTGTTTGAAGGACAGTAAAATTGATGTAGATGCCATTCCCAGGGGGTACTCTTACAAGCCA
8	113348969	113349089	CSMD3	121	AAAACAATCTTGAAAGTTTGGATATTCATCAGGATACCCAGGAGAATAAATGGTGCCATTCATTGCAGTTATATTCCCACCACAAAGAGCTACGGAAAAAGTCACAAAACAAAATAATAT
8	113349746	113349866	CSMD3	121	AGATAGCTTCAAGTTAGAAGCATACCTTCACACCTTGGAAGTGGATGATTCCAATTACGACTGACTCCGTGAAGGCATGTGAGAGCTGAATTTCCAATTAATGTGTATCCTGGGAAACAT
8	113349866	113349986	CSMD3	121	TCAAATGAAATGGTTTGACCCACAGTAAAATCATTACCAATTACAAAACCATTTCGAAACGGGCGTGGATCAGGACAGCTTTGCAACTGATAGGCTGGAAAGAGGAAAAAGAAAGACATT
8	113353690	113353810	CSMD3	121	tattatttCTCTTACCTTGGTATACAATATGAAACCCTTGTTTGTTTTGTGAATAGTCACTGTGAAAATATAAGCTGGTTTCATGGGTGGTGCTGAATAAGGAAGATGGTATTTGAGGAC
8	113353810	113353930	CSMD3	121	CACTAAGCCGGCCAATAACAGTACTAGTTTCTGAGGATCCACTTCGTACTTCCAAATAATCATGTATGGTTTCTGTAGAAAAATTTACAAACTGGAGATGTACACCTGAAGAAGAAAACA
8	113358324	113358444	CSMD3	121	CCAAAACCTATGGGTAGATTTATTGTCCATGTGCAATCTAAACTGCTGGGATAGTTTCCAGGAAACCCAGGACTGAGGATCACACCACTGAAGTCTGACATAGCACCACCACACTGAGCT
8	113363378	113363498	CSMD3	121	AATACTTTATAGTCTTTTAACTTACCTAAACAAATTGGGATTGGATAATTCCATCTTCTTACAGGTCCTGGCATACATGTAATGTGAGAGTGACCCTACATAAACAAAATGATGTGGTTC
8	113364643	113364763	CSMD3	121	CCTGAAGAGAATATCCTTGATCACACTGAAAGGATACTACATCTCCAACCATATATCTGTCTCCAATTTTAATTCCACTGCTAGGAGTTTGTGGTTCAGGACAGGAATCCAAACCAATTG
8	113392573	113392693	CSMD3	121	TTTTTACCTGTGTATTCAAGATGAAATCCTGCAGCAGAAACACTGATGTCTGATTGAAAATTTAGATACAGATTATTAGACGTACTATTCAAAAGATGGGGTATTGTTGTTCCTGAAATG
8	113395784	113395904	CSMD3	121	CTCTTATTTACCTGAATAGCTTCCAAGTCTTGGAGCATTGTTGTCTCCCCCATCATAAAAGTCCAGAGAATCCCAATTATGTTCTGTAGCAAAGCTAACAACTTGCACCTGTGAAATAAT
8	113402835	113402955	CSMD3	121	CTGAAAAGATTAACTACACACATACAATGAAAAGAAGAAAAACTTAAATATTCTTACTTGAATGCCAGCTCCCTCTGGCACTGTGATCTTCCACACACAATTCAGATTGTTGTCATAAGG
8	113402955	113403075	CSMD3	121	CTCAGGGTATCCAGGTGACAAAATAGTCCCTTTGCGCTTAGTTAAAATTCCACCACAGGGCACTGAAAATAAAGCAGTCCAAGAGAGGGAGTTAATTCTAATGCAAAGGATTAAAATAAG
8	113418734	113418854	CSMD3	121	ACAAATTTATATACTCACCAATACAAGTAGGTAAGGAATCATTCCACTGGGCCAAAGAATTGGGCACTGTTTCACACCTAATTGCTATGGATCCATGGAGAATATATCCTGGATTACAAT
8	113418854	113418974	CSMD3	121	CAAAAAGAACCGATGAACCGACTGCAAATTCATTGCCAATTCTTCTTCCGAATCTTGGTTCAGGCACAGAACTGCATTGTGTAGAACTTGTTCTAGGAACAGCTGTGTAGaaatattata
8	113420534	113420654	CSMD3	121	AGGGTCACTTACCTTGGTAAACAAAGTGAAATCCCTTAGCTGTTATTGGTCCAACTGAAGTAAATCGAATTGTGATCTGATTACCTGAACTCAGTGGAAGTGATTCTCCTACTCAACAAA
8	113421144	113421264	CSMD3	121	TACCTGAATGGGATCCTGAGAGGGAAGATAACAGAGAAGATTGCTGAGTTGGCCCATCATACACCTCAACAACATCGTGGAGTGATGTCTGGAAAAATACAAACTGGCCAAACACCACTG
8	113484818	113484938	CSMD3	121	CCAAACTCCTTTGGAACTGCTATAGAATAAACACAATTATGTCCCACACTGTAATTTTTTGGATAGTTTGGTGATAGAACAGTGCCTTCTGAACCTGTTGAACGACTTCCACAGGGCGCT
8	113504695	113504815	CSMD3	121	AGCCAAAAAATATGTTCCTTACCATGACAACTTGGCAAGGCTCTATTCCATCCAGGTCTTCCATCATCTCCCATGATACAGGTGAGTGTTGAATAACCTTGAAGAACATAACCAGCATCA
8	113504815	113504935	CSMD3	121	CAGTAATAGGTGACTGTTGACCCTAATTTATAATCCATTCCAAGTCTGGTGCCATTCATTATATTGCCTGGATCAAAGCAGGACTCTCGCAGTTTTGCTGTAAAACAGTGTTAGTATAAC
8	113515992	113516112	CSMD3	121	TACTAACATGGAATGTTCATATTTACCTTTGTATTCTAGATGAAATCCAGTGTAACTAACAGATCCATCACTCCGAAAAGCCAAATGCATTGTATTTGAGCTGCTTTCTATTCTCTCTGG
8	113516112	113516232	CSMD3	121	TAACTTGCTGTCTTGAAAACTTCCAATCAGTGGGCTATTACTGTCTGGTCCATCATAGATATAGAGGAAGTCATAGTTTGGTTCTATGCTAAAACTgaaaaaaaaaaggaaagaacaaaa
8	113518868	113518988	CSMD3	121	TGGCCTAACAATATATTTTTTTAACGTGGAAATAAATATATAAGAACTCACCTGATGAACGCCAAGGAGATAACATAGTCTGCATTGACGGTGATAGTCCAGTCACAGTCTCTGCTATGC
8	113518988	113519108	CSMD3	121	GGATATGGATGAGGGAAGTTTGGTGAAAGAATAAAGCCTGAAGATCCTGTTAAATTGCCTCCACAGGGTGCTTTAATTTAAACAAACAAATAAAATCTCTTTAAACATTAATACAATTTA
8	113529238	113529358	CSMD3	121	TTTTAATTGTTCTTTAATTCATACCTATACAGACTGGTGGGCTGGGCTGCCAGAAGTACCGATTTTCTACCTGAATGCAGGTTATTCTTTCCTCTCCTTGAAGTTCATATCCTGGGTCAC
8	113529358	113529478	CSMD3	121	ATTGAAAAACAACAGTGTCCCCAGGTTCTCTTCCATCCCCATTTCGAGTCCCATTCATGGGGACCCCTGGGTCACGACACGCAGTGGCAACAGAACCTATCAAAAGACAGAGACAAAATT
8	113562880	113563000	CSMD3	121	ATTTTTTGAAAAAACTTACTTGAAAACTGAATTGCAAATCCAGATTTGCTAATATAAAAATCCGTGTCAAACTGGATGGTTACTATATTGAGGGTGCTATGAATTCCTTCAGGAATAAGA
8	113563000	113563120	CSMD3	121	GATCCACTAATTTCCTTTAAAAGCATATCATTTTCTGGTGGACCGTCCCAGACTCGGAGTATATCATGTGATGCTTCCGTATCAAAAGCAAGAAACTGCAAGCTGTGGGAGAACCATATT
8	113564765	113564885	CSMD3	121	GGGTTGGTTAGGCACTTCAGATTCCCTAGTAATGTTGAGAAAATGAAATTCATTTACCTGACAATATTTCCAGGATCTACCTCAATCATCCACATGCAACGCAGGTTATTGTCATATGGA
8	113564885	113565005	CSMD3	121	AAAGGATAGCCAGGAGATAAGATTCTTCCTGATGATTCTCCTTTAAAACGACCTCCACATTCAGCTGATAAAAAATAATAGAAATTTAAGCCACAATTTAATGCCAATCTTTTCAAAACA
8	113568967	113569087	CSMD3	121	TGAAAATCTATGACAGTATCCTACCAATACAGGAAGGCAGAGGATAGTCCCATGCCCTTCTCTCCCCTGTCATGCACTTGAGAAGGCTACTTCCGTGGAGAGTGTAGCCTGGATTGCATC
8	113569087	113569207	CSMD3	121	CATAAATGATGGTGCTACCAGCAAAGTGGCCTTGGTCACTGATCTTGTATCCAAATTGTGGAATGCCAGGATCTTCACAGTGTGAGAGTTCAAAACCTGGGACAAAAATATAAATTGATT
8	113585688	113585808	CSMD3	121	CACCCCAGTGTTTGGCCATTTTACTCTTCTAAAATACTTACTGGTATACACAAGTTGAAAGCCTTCATCTGTCCCTTCAGTATCGGAATTAAATTCTAGCCAGAGTTGATTTGAAGTACT
8	113585808	113585928	CSMD3	121	ACTAAGTGTCAGTCCGCGCATAGATGCACCAGTAAAAGCACCTAGTAGATGAGTCGTTTTATCTTTTCCATCATAAATCTGCaaaatatatttataattaaaatGTAAATGTGCCAATAA
8	113599259	113599379	CSMD3	121	ATGAACAATATACAAGTATGTCTGAGTTCACCTACCTTAAGAACATCTCCTTGTGCTAAATGAAATGTTCTGGCTGAAATATTGATTCCCTTTCCTGCTTGAACCTGAATACTATAAATG
8	113599379	113599499	CSMD3	121	CATTCATGGTTGTTTTCATAGTTGAGTGGATAATTTGGAGACAGCAAAATTCCTTCATTATTCGTTGCAGATGCACCACATTCAGCTGCAGGTAAAACAGAATATTGAAGTACAGTTTAA
8	113649020	113649140	CSMD3	121	CAAATGAAAGCAGCTGACCACGTACCCACACACCTTGGCAGAGGTGCACTCCACACTCGTCGGCCACCACCAAGACAGATGATCTCTGATGTTCCTTCCAGTCGATAACCCGAAGAGCAT
8	113649140	113649260	CSMD3	121	GAGAAGGTCAGAGTGTCACCAATCCCAAAGTTGAACCCGATTCGACTACCATATTGAGGAATGCCAGGATCTTCACAAGGTTCAAGGTTATATTCTGTAAATTAGAGAGAAAAATTTCCC
8	113650912	113651032	CSMD3	121	TTATTTTCTCACCAGAGAATGTTATGTTAAATCCTTCATATGATATTGAAAAATCTGAAATGAAACGCAATTGAGCCCTGAAATTTCCATAGAGACCAGCATTGATTGTTGGAGGAAGAT
8	113651032	113651152	CSMD3	121	CTGAACCAGTCAGGCGTGCCAGTGGTTGGGTAAAACTGCCATTCTCTGTGATCAGTAAGTAGTCATGATGGTCTTCCAAATGAAAAGTGTGGAAGTTGAACTGCACACCTATTAAGAAAA
8	113657336	113657456	CSMD3	121	CCTTTTCCATGGGTTACATCAACAGTCCATGTACAATTCAGAGAATTTGGATAAAATTCCGGGTAACCAGGTGATAAGATTGTTCCACTAGGCCCTCTAACATCTCCTCCACATAATGCT
8	113662364	113662484	CSMD3	121	TTTTGCATGTCAAATGAGTTATTACCATCACAGGTTGGAAGTGGATGACTCCACCAGTGGTTTTTTTCGCATAGAAGGGGCTCTTCATGACTCAACCTGTATCCTGAATCACAACTAAAT
8	113662484	113662604	CSMD3	121	GAAACAGTAGAGCCAATGGAGAAATCATGACCATAGCGACGGCCATGTACAGGTATGCCAGGGTCCAAACAAGAATACGTGTTCACTGTAACACCTGGAAAACAAAGGGAAGAAAATAAA
8	113668356	113668476	CSMD3	121	AATCAAAAAGTTTTATCATTACTTACTTTCATAATGAATCTTGAAACCATTATTGGAACGACTGTTGTCTGTTGTAAATAGAAGGTATATAAAATTACTGCTACTAAATAGAAACTGGGG
8	113668476	113668596	CSMD3	121	CACTTGGGTGCCATTGTAAGATCCAAGCAAGGGTGACAGAAGATTTGGCCCATCATGAACTTCCAGAACATCATAATTCAGTTCAGTCTGAAATCTAAGATTAAAAGACACATGTGAAAA
8	113678454	113678574	CSMD3	121	TAATCTTTTAGATAATATTTTCTTTAAAAGTAGGAAAAATATTTGTGAGACCTTTCAAATGTAATTTTGATAGAGTGTCCAGGTTCAGCTTCAATCACCCACTCACAATTCAAAGAGTCT
8	113678574	113678694	CSMD3	121	TTGTAGTATCCTGGCCATCCTGGTGAGAGAATCACTCCACTGGGAGCTGAAAAATGGCCACCACATGGGGCTGAAAAATTAAATCAGACAAGTAAGAATAAAACATTCAAGATAAATCGC
8	113694647	113694767	CSMD3	121	TTCTCACTCACTACTACACTTACCTCCACATTTTGGAATCAGTCCACTCCACATTACTTTTCCATCCATAAGAATACATGTAATTGTTTCTGTTCCCTGGGTTTTAATAAATCCTTCTTC
8	113694767	113694887	CSMD3	121	ACAAATAACTGAAATTGAACTTCCTAATTGAAAGTTGTCCCCAAACCGCCGTGCATTGATTGGTATTCCAGGATCAGGGCATTCATTATGTCCAAATGCTTTAGAATAATATGCAAAGAA
8	113697617	113697737	CSMD3	121	CAGAAACAGAAACTTACTGTTGTAAGTGATGTTAAAGCCACGTCCTGACATTGAGTGGTCAGCCTGAAATTCCAATCGCAGTATGTGACTATTACTAGTAAGATGGGAAGGCACCTCAGC
8	113697737	113697857	CSMD3	121	CCCAGTAAAGGTTCCAAGAATTGGGGATTCTGGAGAGTCACCATCTTTAACAGCAAGGAAATCAAACTGGGATTCCAGGTCAAAGTCATTGAAAGAAAGATGTATCCGGCTCCCTGGATC
8	113697857	113697977	CSMD3	121	AGAGATTATCGTCCAGATGCAATTTAAATTATTTCCATACCCTTCTGGGTAATCAGGAGAAAGAACTGTTCCCATTGGTGCAGTAAAGTTAGACAGGCAGGGAACTGGTGAAACAGGAAG
8	113702067	113702187	CSMD3	121	TATCTGGAAGCAAAGCATTTGGTACTCACAGATACAGATGGGTATGTTTGCAGACCATTGGTTATTCTCTTGACAAACAATGGATTTCTCTCCAATTAATTCAAACCCAAACTGGCATTC
8	113702187	113702307	CSMD3	121	AAACCTTAAAACATCACGATTAGAAAATCCATCGCCTTCTCTAATTCCATATAAGGGTGTACCAGGATCACCACAACTTTCTTTCTCAATTTCTGGAAAAATAGAAGATAAAAGTCACCT
8	113812387	113812507	CSMD3	121	TACCTTTGTAGTTAACCTTGAAACCAACAGATCCAACACTTTCGTCCGTTTGAAGGTGCAGCCACATTTGGCTACTCATGCTCACTATCAAGTCTGGTACAAAGCTTCCAGTCAGCCTAA
8	113841906	113842026	CSMD3	121	GAACTTACACTTGGAGCACTGTCCTAGGATCTCCAACTTCGCCCCCATCGCCAATTGTCAAGGTATCATAGCCAATCTCCAGATCAAATTCTTCAAAATTTATCTGGATAACCTAGCAGT
8	113871314	113871434	CSMD3	121	TTTGCCTTTGTCTTTATGATTATGACTTTTTTTTTAAATCACAGATGGTGTTCTCTTACCTTATTTGTATTCACTGCTGTGATGACCCAGACACATTGTGCATTGCTGTCATACTGGAAC
8	113871434	113871554	CSMD3	121	GGAAAGTTGGGAGATGTAAAGGTACCACTTGGTCCTTGAAGATTAGAGCCACACGTTTTCACTAAAAGAGAAATTGCATTTTAAAAGATGAACATATGTCACATGTAAAATTACAACAAT
8	113933798	113933918	CSMD3	121	TGAAATAAAGGTTAAACTATTAAAATGTGTTCAGAGGGCATTATTATAAAACATTACCTTTACACACAGGCCTGTGATCACTCCAAGCAGCAAAAACTTCAGCTATCCGTTGACAGGTGA
8	113933918	113934038	CSMD3	121	TGCTCTTTGCGCCCTGTAGGACATAATCTTCATCACAAGAGAACTGCACAGTTGATCCAAGGCTAAAGTTAAATAAAAGAGAAAAAATATGATAAGAAAGATGCAACATAATAACTAGGC
8	113960002	113960122	CSMD3	121	TATTTTAAAATATTACCTAAAATCTGATCCGATTCTCTTCCCATTTTCTGGTTCTCCTGGATCTGGGCATAAATTGGAAGCTGTTTTAATACCTCCCTCATTTACTGCAACAGCAGGGAA
8	113966891	113967011	CSMD3	121	ACAAAAAAGAAGTACACTCACAGATAGAAAACTTGTTGCTGTTGTCTTTCCCTGGAAACAATTTAAATCCTCTAGATTTAAAATCTATGGCCTTTTTCACTAGTTAAGAAAACAAACAAA
8	113988277	113988396	CSMD3	120	ACATCTGCAGGTGTGCTAGCAACAGCAATAGCACCAGTGGTAGTCCTGTTATGCTCCTCTAACTCACCAGTGGAGGTAGTGTGGGTCAATGTAGAAGAACCTGTGGGACACAGTAGCAC
8	114031292	114031412	CSMD3	121	TACCTTGATAGGGAGCACTAAATCCACGGTATCGATGATTGCTGTCTGTAACAAAATGCAGTCTGAGCCAGTTTTTGTTGCTGATAATTGGTGGTGGTATATTCATTCCAGATAACCTGA
8	114110968	114111088	CSMD3	121	GAAGCTATTTACTTACCATATGGTAGGTGGCTCAGAACCTTCTATTTCTAAGTAATCATATTTCTCTTCCATTTGAAAATCAGTAAATATGAGTGAAATTGTGTCCCCAGGCTCTGCTAC
8	114111088	114111208	CSMD3	121	AATGGTCCAAGTGCAATCAGCATTGTTATGGTACTCATTAGGAAAACTAGGGCTGGATATGATGCCACTGGATCCTCTCATTGTTCCTCCACAAGCATCTTCAGCTGTTAAAAATGACAA
8	114185927	114186047	CSMD3	121	TTTTTAAAGTGTTTTCATTTTACCTCTACAGATAGGAACAGGAAAATCCCACGAAGCTGTATTAACTGAATTGGCTATGCAGGTGAGCTGAGGGTGGCCATCAAGGATGTATCCAGTTAC
8	114186047	114186167	CSMD3	121	ACAGCTGTAGCGGATCTTGTCCCCGACGTCGAATCTTGTGCCATATAATACACCTTTGGGTGGAACACCAGGATTTCCACAAGAGCTACTCTGCAATTCTATTAAAAAGGAGGAAAAGGA
8	114290817	114290937	CSMD3	121	TACCTTCGTAATATACCTTAAATCCATGAGCACTAACTGCAAAATCACTGGTCAAACGTAGTGAGAACACAGATTTGGTACTTGTCACTGGAGGTGGCAGATGGAATCCTGTTAACCTAA
8	114326790	114326910	CSMD3	121	CACACTAACCTTGTCCTAAAGTTTGTAGGATGAGGATGTCCATCATATAATGATAAGTAGTCGTATTCTTCTTCTAGAGCAAATGACTGAAAAACAATTTGTATTCTATTTCGTTCTTCT
8	114326910	114327030	CSMD3	121	GCTATTATTACCCATGTGCAGTTTGCACCATTTGGATATCCATATGGAAAACCAGGGCTTTCTATAGTGCCATTAAGTCCTTTTAAAGTTCCACCACATGTATAAATAAATCCTGCAACA
8	114388920	114389040	CSMD3	121	GGACCGAAAGGTTCGGCGCAAGGAGCCTAAGAGCCAGGATATCTACCTGAGGCTGTCTGTCGGTCAAGCTGTACAGGTTTCCAGCAAAGGAACCAACTCCACATTCAACCGGGTTGTGCT
8	114389040	114389160	CSMD3	121	GAAGAGGTTGTTTATGAGTCGCAACAACCGGCCACCTCTGCCCCTTTCCCGGATGATCTGGAAGATGAAGCTTCCTGGCCGGGAAAACAAAACAGCCGTGGTTGTGGGGGCCATAACGGA
8	114389282	114389402	CSMD3	121	CGCGGGGCAAGAGCCTCACTTTTCGCCAGCTGGCGCTGGACTCCCCCAAGGGCTGCGGCGTCGTCCGGCTCTCCGGTCCTCCAAAGGGCCGAGGGGTGTACGCCCCGGAAACCCTGCAAA
8	114448874	114448994	CSMD3	121	AAAGCGGAGGGGACCCCCAAAGCAGACCTACCTTTCACACAAGACACCGTCAATAAAAAGACGAGGTTCCAAAACGTAAATCCACTTTTAATCCCCATTTTCTTCATCAGGATGAAGTCT
8	114448994	114449114	CSMD3	121	AGGCGGCCACATTTAGCGCATCTTCGCTTGCCAGGCTCCCAGGGTTTGGATTCCTTTGCTCGGCTTTCCCCTTTGCGGATCCCTTTCATATTATTCGCGAGCTCCTAATTCCTGCTCCTC
9	21968174	21968294	CDKN2A	121	CGGTGACTGATGATCTAAGTTTCCCGAGGTTTCTCAGAGCCTCTCTGGTTCTTTCAATCGGGGATGTCTGCAGAGGGCAGAAAGAAAACAGGCGTTAGAAACCTGAGGTCAAAGATGTGT
9	21968439	21968559	CDKN2A	121	GGCTGCTCCAGGCGCGCCGACCGCTCAAGCGCTCCAGGTCCACCCGGCGGAGGGCAGAGAAAGCGCGACCGCGCGGCCCGCAGGGTTGCAAGAAGAAAACGAGTGTTATATAATGAGTCT
9	21968559	21968679	CDKN2A	121	CAGTGGTTGCTCACAATGCCAGGCGCGAAGGCGTGAAGATGTGGCCTTTCCCTTCCCGCATCCCCAGGCATCTTTTGCACCTGGTGCGGAGTGAGCCAGCCAGCTTGCGATAACCAAAGG
9	21968679	21968799	CDKN2A	121	GCGCCTCAGGCTCTGGCGCTCCTCGGCGGAATCCCGTAGCTTCCCTACGCATGCCTGCTTCTACAAACCCACAAATGGTTTCCGATCATTTCTGAAACAAAATGGATGCTCATTTATTCA
9	21970873	21970993	CDKN2A	121	ACAAATTCTCAGATCATCAGTCCTCACCTGAGGGACCTTCCGCGGCATCTATGCGGGCATGGTTACTGCCTCTGGTGCCCCCCGCAGCCGCGCGCAGGTACCGTGCGACATCGCGATGGC
9	21970993	21971113	CDKN2A	121	CCAGCTCCTCAGCCAGGTCCACGGGCAGACGGCCCCAGGCATCGCGCACGTCCAGCCGCGCCCCGGCCCGGTGCAGCACCACCAGCGTGTCCAGGAAGCCCTCCCGGGCAGCGTCGTGCA
9	21971113	21971233	CDKN2A	121	CGGGTCGGGTGAGAGTGGCGGGGTCGGCGCAGTTGGGCTCCGCGCCGTGGAGCAGCAGCAGCTCCGCCACTCGGGCGCTGCCCATCATCATGACCTGCCAGAGAGAACAGAATGGTCAGA
9	21971303	21971423	CDKN2A	121	CACAAGCCCCAGGTGTCTAATTACCCCTACATTTGCTTCCAGTTTCCAATTTCCTTCTTGAGTTCTCTATCCATTCTTCAGTACACAATGAATTCCATTATATCCTCCGAACTTCTGCGG
9	21974347	21974467	CDKN2A	121	AGACTCCCTTTTTATCCCAAACGTTCGTAAATTTTGTATCTGATAAAGAGCATACTTCCATCTAATACAAATATGTTCCCCCCTTCAGATCTTCTCAGCATTCGAGAGATCTGTACGCGC
9	21974467	21974587	CDKN2A	121	GTGGCTCCTCATTCCTCTTCCTTGGCTTCCCAAGCCCCCAGGGCGTCGCCAGGAGGAGGTCTGTGATTACAAACCCCTTCTGAAAACTCCCCAGGAAGCCTCCCCTTTTTCCGGAGAATC
9	21974587	21974707	CDKN2A	121	GAAGCGCTACCTGATTCCAATTCCCCTGCAAACTTCGTCCTCCAGAGTCGCCCGCCATCCCCTGCTCCCGCTGCAGACCCTCTACCCACCTGGATCGGCCTCCGACCGTAACTATTCGGT
9	21974707	21974827	CDKN2A	121	GCGTTGGGCAGCGCCCCCGCCTCCAGCAGCGCCCGCACCTCCTCTACCCGACCCCGGGCCGCGGCCGTGGCCAGCCAGTCAGCCGAAGGCTCCATGCTGCTCCCCGCCGCCGGCTCCATG
9	21974827	21974947	CDKN2A	121	CTGCTCCCCGCCGCCCGCTGCCTGCTCTCCCCCTCTCCGCAGCCGCCGAGCGCACGCGGTCCGCCCCACCCTCTGGTGACCAGCCAGCCCCTCCTCTTTCTTCCTCCGGTGCTGGCGGAA
9	21974947	21975067	CDKN2A	121	GAGCCCCCTCCGACCCTGTCCCTCAAATCCTCTGGAGGGACCGCGGTATCTTTCCAGGCAAGGGGACGCCGTGAGCGAGTGCTCGGAGGAGGTGCTATTAACTCCGAGCACTTAGCGAAT
9	21975067	21975187	CDKN2A	121	GTGGCACCCCTGAAGTCGCCCCAGGTTGGGTCTCCCCCGGGGGCACCAGCCGGAAGCAGCCCTCGCCAGAGCCAGCGTTGGCAAGGAAGGAGGACTGGGCTCCTCCCCACCTGCCCCCCA
9	21991587	21991707	CDKN2A	121	TTAGTAATAGGAGTTTTTCATATGTTGGGAAAATGGTTTAGCTTAACTCTATCATGGTAGTTGATAGTGATGAACTAACGTGGAATAATAGATCTGTAAACCATCATAGACGGTAATAGG
9	21991707	21991827	CDKN2A	121	CTATGTTGTTGCTACCTTAGGATCATAATGGACTTTCTAAAATTCAAGAGTACTCAAAGAAGTAAAATGAATATAAGTCTTGATTTCTGAAAGGGCTATGGTTCACTTGGAACACAATAC
9	21991827	21991947	CDKN2A	121	AAACTGTGAATCATGTACACATGGGGAATAATGGTTTATACTAACTGCACAGTGCTTACCTTGAGAGGACTCTGTGCTATTAAAGAAAAAAATAACCTGAGCCTTCTGAAGTAGCTATAA
9	21991947	21992067	CDKN2A	121	ACAAATGAATATTTAACTTCATAATAAAAATATGACTATTTTGTAAATGCACCAAGGTAGAAGTAACAAATCAACTATGGCAATTTTTCAGGTTTCTGTGGTTAAGAAACTGGTAACGTG
9	21992067	21992187	CDKN2A	121	GAATTTTAGTATATGTATTTCCAATCATATAAAAATAAAAAGTCATAATAAACATATTTGCAGAAACTTAAAAAAAGTTAAAATAACATCTTATTTGCAATGATATTAAATAATTCATAC
9	21992187	21992307	CDKN2A	121	AAGTAATTTTTAGCACTTGTGCCTCTCAAGGAATTGTATGAATCCTAACATAATTAGTATCCATATATATTCCCAAATCAATATAGCCATGGGCATAAAATATATTAATGTGAAATATAT
9	21992347	21992466	CDKN2A	120	TATGTATATCATTTTACATATGAAATTGGAAAATTGCATATATTTCAAGACATTCTATCCAAGCTGTGTTCTATCTTGAGAAACTTCCTGAAGATTGCGCTTTTCACATACGTCCTGAA
9	21992466	21992586	CDKN2A	121	AATTGATTTATACCTAAATAACAAAAAATGATCTATTTCAATGAACCTATCATTTAAATATTTTTGCATTTCATGCATATACATTAACATACTATAAAATATTTTCTCTAACTTAAAATC
9	21994115	21994235	CDKN2A	121	ACTTTTCGAGGGCCTTTCCTACCTGGTCTTCTAGGAAGCGGCTGCTGCCCTAGACGCTGGCTCCTCAGTAGCATCAGCACGAGGGCCACAGCGGCGGGCGCCCCTGGCGCTGCCCACTCC
9	21994235	21994355	CDKN2A	121	CCCGTGAGCCGCGGGATGTGAACCACGAAAACCCTCACTCGCGGCGGGCCGCACGCGCGCCGAATCCGGAGGGTCACCAAGAACCTGCGCACCATGTTCTCGCCGCCTCCAGGGCCGAGC
9	21994355	21994475	CDKN2A	121	TCGGCAGCCGCTGCGCCGCCCTTTGGCACCAGAGGTGAGCAGCGCCACTCCTGCCCCCTTAACTGCAGACTGGGACCCACGCACCGCCCCCTGCCCATCTCCGCCCCGCAGGCGCGCACC
9	79792610	79792730	VPS13A	121	GCTGAGGAACATGGTTTTCGAGTCGGTGGTCGTGGACGTGTTGAACCGGTTCTTGGGGGACTATGTGGTGGACTTGGACACGTCCCAGCTCTCTCTGGGCATCTGGAAAGGTAAGGAGGC
9	79814822	79814942	VPS13A	121	TATTTGATTGTTTGAATCTTTTTTTTAATCTTTTTTAGGAGCTGTGGCCCTCAAGAATCTTCAAATTAAAGAAAATGCCCTGGTAGGTTTTGACTATGAAAAATTTGTAAAGTTATTGCA
9	79816242	79816362	VPS13A	121	CTACTAATGTTTTGTGTATATATAAATTTTTTCTGTAGAGTCAACTGGATGTACCATTTAAAGTTAAAGTTGGTCACATAGGTAAGCCATATTCATTATTGGGATATCCTCCTTCCTGGA
9	79820216	79820336	VPS13A	121	AAAAAAATGTAGGTAATCTTAAACTTATAATTCCATGGAAAAACCTTTATACTCAACCTGTTGAAGCCGTATTGGAAGAAATTTATTTACTTATAGTGCCTTCTTCTAGTAAGttaaatt
9	79820884	79821004	VPS13A	121	TTCCTATAGGAATAAAATATGATCCTTTAAAAGAAGAGAAACAACTCATGGAAGCAAAGCAACAGGAACTGAAAAGAATAGAAGAAGCAAAACAAAAAGTAGTTGATCAAGGTAAAGAAA
9	79824333	79824453	VPS13A	121	TGTAGAACAACATCTGCCGGAAAAACAGGACACTTTTGCAGAAAAATTAGTTACACAGATCATAAAAAATCTTCAGGTGAAAATTTCCAGTATCCATATTCGTTATGAAGATGATGTAAG
9	79825501	79825621	VPS13A	121	TGAATAAATTTTACTTTCTTTCCTCTTTAGATCACAAATCGGGACAAACCGCTGTCATTTGGTATTTCCCTTCAAAATCTGAGCATGCAGGTATTTTGTTTATAAAAGAATCTTAACCAT
9	79827854	79827974	VPS13A	121	TTTACTGCCATTGTTTTTTTTCCTTTTCAGACAACTGATCAATACTGGGTTCCATGTTTACATGATGAAACTGAGAAACTGGTTCGTAAGGTAAATAAATACTGTGTTTGTCAACTCATG
9	79828129	79828249	VPS13A	121	CTAATAAATTTTATTTTCAGTTAATCCGATTGGATAACCTGTTTGCCTATTGGAATGTGAAGTCTCAGATGTTTTATCTTAGTGATTATGATAACTCCTTGGTAAGTAAATTTTTTCTGT
9	79829213	79829333	VPS13A	121	ATATAAATAAAAGCAATTTGTCTTTTAATAGGACGACTTGAAGAATGGCATTGTCAATGAAAATATTGTTCCAGAAGGTTATGATTTTGGTAAGTACATTTTATAAGATAAAAAAAGTAG
9	79834813	79834933	VPS13A	121	GCCTTGAGACTTTGGAAATATAACTCAGTTTTTTTTCCATTTTTATTATTTTTCAGTATTTCGTCCCATATCTGCTAATGCCAAACTTGTGATGAATCGCCGATCTGATTTTGACTTTTC
9	79834933	79835053	VPS13A	121	TGCCCCCAAAATAAACTTGGAAATTGAGTTACATAACATAGCAATTGAATTTAATAAACCACAGGTGATTTTCTTTAATATAATTTTCAATTGTGAATTATTGTTTGATAAAAGCAAAAC
9	79835186	79835306	VPS13A	121	CTTTAGTATTTCAGTATTATGGAGCTTCTTGAATCAGTTGATATGATGGCACAAAATCTGCCATATAGGAAGTTCAAACCTGATGTGCCTCTTCACCACCATGCCAGAGAATGGTAAATG
9	79836066	79836186	VPS13A	121	TGAGGGTGTTAAATGTTTTTCTTTTTTTAACTAGGTGGGCTTATGCTATACATGGCGTTCTTGAAGTAAATGTTTGCCCCAGGTTATGGATGTGGTCATGGAAGCATATTAGAAAACATA
9	79836186	79836306	VPS13A	121	GGCAAAAAGTGAAGCAATATAAAGAACTGTATAAAAAAAAGTTAACAAGTAAGAAGCCACCTGGTGAACTTCTCGTGTCTTTGGAGGTTAGCATTTAAAATGAAATTGTTGAGTGTTTTA
9	79840813	79840933	VPS13A	121	TTAACACATTTTTGTTTATATTTTTCAGGAGTTGGAAAAAACCTTGGATGTCTTTAATATAACTATAGCTAGACAGACGGCAGAAGTTGAGGTAATTCTTGGCTTTTCAATTAGTAAAAA
9	79841327	79841447	VPS13A	121	CAGTTGCTAAATAAAGGATAATGTGTCATTTATTTGAAAATTTATTCATTTTAGGTAAAGAAAGCTGGATACAAAATTTACAAAGAAGGAGTAAAAGATCCAGAGGATAATAAAGGGTGG
9	79841447	79841567	VPS13A	121	TTTAGCTGGCTATGGTCTTGGTCAGAACAAAATACTAATGAACAGCAACCAGATGTTCAACCTGAAAGTATGTCCATTTCATTTTACAGCATAGTTAATCACTGGGTGTCAAAATAAAGT
9	79842294	79842414	VPS13A	121	TCTGATTTGTAGCTCTTGAAGAAATGTTGACACCTGAAGAAAAAGCTTTACTCTATGAAGCAATTGGCTATAGTGAAACAGCAGTTGATCCAACTTTACTAAAAACAGTAAGATGTTTTC
9	79842989	79843109	VPS13A	121	TTATATATATATATATGTTTTCATTTTATTCTTCTGAATATACCTTAGTTTGAAGCCTTGAAGTTTTTTGTCCACTTGAAAAGTATGTCTATTGTTCTAAGAGAAAATCATCAAAAACCT
9	79843109	79843229	VPS13A	121	GAGCTGGTAGATATTGTAATAGAAGAATTTAGCACCTTAATTGTGCAAAGACCAGGAGCACAAGCAATAAAGTAAGTATTAATTTATCTTTTTTTATCATATATGAAAAAACTTCACTGT
9	79852892	79853012	VPS13A	121	CTTTTTTCTTTTTTTTTTAATGCAGATTTGAAACTAAAATAGATTCATTTCATATTACTGGCTTACCAGATAATTCAGAAAAACCCCGCCTCCTGTCTTCATTGGATGATGCAATGTCAC
9	79853012	79853132	VPS13A	121	TTTTCCAAATTACATTTGAGATAAATCCATTAGATGAAACTGTTTCTCAGAGGTGTATCATAGAAGCTGAACCTTTAGAAATCATATATGATGCAGTAAGCATTTTTTTAAATTACTAAG
9	79853185	79853305	VPS13A	121	AGAGGACAGTGAATAGTATAGTGGAATTCTTCAGACCTCCAAAAGAGGTACATCTAGCACAGCTCACTGCAGCAACTTTGACAAAACTGGAAGAATTTCGCAGTAAGACAGCAACAGGTA
9	79862122	79862242	VPS13A	121	TTCTCGAGTAATTTGTGAAAAGTATTCATAGAAAAGATTTACATTTTTCCAGGTCTACTGTATATTATTGAAACACAGAAAGTTCTTGATCTCAAAATTAATTTGAAGGCTTCATATATT
9	79862242	79862362	VPS13A	121	ATTGTCCCACAAGATGGAATTTTTAGTCCTACATCAAATCTGCTTCTTTTGGACCTTGGTCATCTAAAGGTATATACTAATAATATTTGATTTATGATACAGCATTTGGGGTGTTTCTTT
9	79864958	79865078	VPS13A	121	TACTTACATTTTGAAGTATTTTGCATAGTCTAAACTATTAAAATTAACTTGAAGGTGACGAGTAAAAGTCGTTCTGAATTACCAGATGTGAAACAAGGTGAGGCCAATCTTAAAGAGATA
9	79865078	79865198	VPS13A	121	ATGGATAGAGCTTATGATTCATTTGATATTCAACTTACAAGTGTACAGCTGCTTTACAGTAGAGTTGGTGAGTATAAAATGCATTATTTGTTGATTGATTTTGTTGAAGTGATTAATTAG
9	79867149	79867269	VPS13A	121	GGTGATAATTGGAGAGAAGCACGAAAACTCAGTGTATCTACCCAGCATATTTTGGTACCCATGCACTTCAATTTGGAACTGTCTAAGGCCATGGTTTTCATGGATGTAAGGATGCCCAAG
9	79874951	79875071	VPS13A	121	AAATCAGAATAATTCCTTTATAATTACTTATTTTTATCTTTTCAAAACAGATTCAAGATTTATGGAAAGTTACCTCTTATTTCTTTACGAATCTCAGATAAAAAACTACAAGGGATTATG
9	79875071	79875191	VPS13A	121	GAATTGATTGAAAGCATTCCAAAACCTGAACCAGTAACTGAAGTATCTGCCCCTGTCAAATCATTCCAGGTAATGTTACTTTCAAAATTAATATAAGCATGAATTAAGAAAGTCCACAAA
9	79888177	79888297	VPS13A	121	GAATTACTTTTCTTTCAGATTCAAACATCTACTTCTTTGGGAACATCACAGATTTCACAGAAAATAATTCCTCTCTTGGAACTTCCATCTGTTTCTGAAGATGGTAAAATGAAACTGCTT
9	79890371	79890491	VPS13A	121	TCATTTTAATTATTGACTTAAATAATGTTCTGTGAAATGTAGATTCAGAGGAGGAATTTTTTGATGCACCATGTAGTCCCTTGGAAGAACCTCTTCAGTTTCCAACTGGAGTTAAAAGTA
9	79890491	79890611	VPS13A	121	TTCGAACCAGAAAGTTACAAAAGCAGGATTGTTCAGTAAATATGACTACATTTAAAATAAGATTTGAAGTACCAAAGGTAGGTACTACGGTAAAATTAACATGGCTTAATTTGTTTGCTG
9	79890938	79891058	VPS13A	121	TTGTTTTATGTAGTGGTAATTTCTTTTTTCTTTCTTCTCCAGGTTTTGATCGAGTTTTATCACCTTGTTGGAGATTGTGAACTATCTGTGGTAGAAATTCTTGTTTTAGGATTGGGTGCA
9	79891058	79891178	VPS13A	121	GAAATTGAGATTAGAACATACGATTTGAAAGCAAATGCCTTTTTGAAAGAGTTCTGCTTAAAATGCCCAGAATACTTGGGTAAGAATCTCtattttttaaaataaataaattaatttCAT
9	79895054	79895174	VPS13A	121	ttttaaaaaattatttttaGATGAAAACAAGAAACCAGTTTATTTGGTTACAACCCTGGATAACACAATGGAAGACCTGTTAACGCTGGAATATGTAAAGGTAAGCAGTTTCATTTATAT
9	79896752	79896872	VPS13A	121	TTCTAACAGATTTGTTTTCTCTTTGGATAGGCTGAAAAGAATGTACCCGACTTGAAAAGTACCTATAACAATGTTTTACAATTGATTAAGGTATGAGTAGATAATTTATTTTTTAATTAT
9	79896993	79897113	VPS13A	121	AAATATTTATTGACCTATCACTAAAATCAGCTTTGTTCTTTAGGTAAATTTTTCCTCTTTGGATATTCATTTACACACTGAAGCACTTCTGAATACAATAAATTATCTTCATAATATCCT
9	79897113	79897233	VPS13A	121	TCCGCAATCAGAGGAAAAATCAGCCCCAGTGTCCACTACAGAGACTGAAGACAAAGGAGATGTCATTAAAAAATTAGGTATGTTTTTTAAAAATTTAGCATCAACTTTTTTTTTTTTTAA
9	79898268	79898388	VPS13A	121	AGCTTTAAAACTATCCACAAATGAAGATATCATTACTTTGCAGATTTTAGCAGAATTATCGTGTTTACAGATCTTTATTCAAGATCAGAAATGTAACATTTCTGAAATTAAGATTGAAGG
9	79898454	79898574	VPS13A	121	TCCCTTAGGGCTTGATTCTGAGATGATTATGAGGCCTTCAGAAACTGAAATAAACGCAAAGCTAAGGAATATAATTGTTTTAGATTCTGATATAACAGCTATATACAAAAAGGTAAGAAT
9	79908220	79908340	VPS13A	121	AAATGGATTGTGATAATTAAATTTTCTCTTATTAAGGCTGTTTATATCACTGGAAAAGAAGTTTTCAGCTTCAAAATGGTTTCTTACATGGATGCAACTGCTGGTTCTGCATACACAGAT
9	79908340	79908460	VPS13A	121	ATGAATGTGGTTGACATTCAGGTTAATTTAATAGTTGGTTGCATTGAAGTAGTTTTTGTCACGAAATTTCTATATTCTATATTGGTAAGtattttattaaattattatttattttataCT
9	79910429	79910549	VPS13A	121	TTAAGAATATAATTCTGTTATCTTACAGGCTTTTATAGATAATTTTCAGGCAGCTAAACAAGCCTTGGCTGAGGCAACTGTTCAGGCAGCTGGAATGGCTGCTACTGGTGTAAAAGAACT
9	79910549	79910669	VPS13A	121	CGCACAAAGGAGTTCCAGAATGGCACTGGATATTAACATCAAAGCCCCAGTTGTGGTCATCCCGCAGTCTCCAGTTTCTGAAAATGTTTTTGTTGCTGATTTTGGACTAATTACAATGAC
9	79910669	79910789	VPS13A	121	AAATACCTTTCATATGATAACAGAGAGCCAGAGCTCTCCCCCACCTGTTATTGATTTGATAACAATAAAGCTGAGTGAAATGCGACTATACAGGTAAGCTTTTCACAAGTATATTTGTGT
9	79917784	79917904	VPS13A	121	TGAATGTATATGAAACAATTTAAAAGAATGTTATCTCTACTTATAGATCTCGATTTATTAATGATGCATACCAGGAAGTACTGGATCTACTCCTGCCATTAAATCTTGAGGTTGTGGTTG
9	79917904	79918024	VPS13A	121	AACGAAATTTATGCTGGGAGTGGTACCAGGAAGTTCCTTGTTTTAATGTAAATGCTCAGCTGAAACCAATGGAGGTAACTTTTTTTGGATACTTATCAATTTTTGTTTTGCTTGTTGAAA
9	79922816	79922936	VPS13A	121	TGAAGTAGCAGTGCTAAAAAGAACAAATCTTTTTTTTTTAACAGTTCATTCTTAGTCAAGAAGATATAACAACTATTTTTAAAACATTGCATGGCAATATATGGTATGAAAAAGATGGTA
9	79922936	79923055	VPS13A	120	GTGCCTCACCTGCTGTAACAAAAGACCAATACAGTGCCACTAGTGGAGTTACTACTAATGCTTCACACCATTCAGGAGGTATGTTTTTAACTTCAAAtttctttctgctttcctctttc
9	79928851	79928971	VPS13A	121	TAATGAGCTACTTTTCATGATATTTTCTTTTATTAAATAACTTTAATTTTTTCAAGGAGCAACTGTGGTGACAGCTGCTGTGGTAGAAGTACATTCACGTGCCTTACTAGTTAAGACAAC
9	79928971	79929091	VPS13A	121	ACTAAACATAAGCTTCAAAACTGATGATCTCACCATGGTGCTGTATAGTCCAGGTCCTAAACAGGTAAGTCCAGGAAGAAAAGAAAATGTATTTTCACATGTGAAATTTGCATAGGTTGA
9	79929375	79929495	VPS13A	121	TCTTTGTAATTTTGTGTTGGTTTCTCCTTTCATAGGCTTCCTTTACAGATGTTCGTGATCCTTCTCTGAAACTTGCTGAATTTAAATTGGAGAATATTATAAGTACTTTAAAAATGTATA
9	79929495	79929615	VPS13A	121	CAGATGGCTCAACATTTTCTTCCTTCTCATTAAAAAACTGTATTTTAGATGATAAAAGACCTCATGTCAAGAAAGCAACTCCTCGGTATGTATTGTAATGATGTTCTAAGGTTTTACTTG
9	79930157	79930277	VPS13A	121	GTGTTTTCCAGAATGATAGGACTGACAGTTGGTTTTGACAAAAAAGACATGATGGATATAAAGTACAGGAAAGTCAGAGATGGTTGTGTGACTGATGCGGTCTTTCAAGAAATGTATATT
9	79930277	79930397	VPS13A	121	TGTGCAAGCGTAGAATTTCTGCAGACTGTTGCAAATGTCTTTCTTGAGGCCTACACCACAGGCACTGCTGTAGAAACCAGTGTGCAAACATGGACTGCTAAGGAAGAAGGTTAGTTATTG
9	79931085	79931205	VPS13A	121	TTAGTACCTACACAGGAATCAGTGAAGTGGGAAATTAATGTTATTATTAAAAATCCTGAAATTGTGTTTGTAGCTGACATGACAAAAAATGATGCTCCTGCTTTAGTCATTACAACACAA
9	79931205	79931325	VPS13A	121	TGTGAAATTTGCTATAAAGGTAACCTTGAAAATAGTACAATGACTGCTGCCATTAAAGATCTCCAAGTGAGAGCCTGCCCGTTTCTTCCAGTCAAGAGAAAAGGCAAAATCACTACTGTG
9	79932507	79932627	VPS13A	121	TTTTTCTCTCATAGGTTTTGCAGCCCTGTGACTTGTTTTATCAAACTACTCAGAAAGGTACAGATCCACAAGTGATCGATATGTCAGTAAAATCCCTGACACTAAAGGTAAATTAAAATA
9	79933148	79933268	VPS13A	121	AGGTTTCACCAGTTATTATAAATACTATGATTACCATAACTTCAGCACTGTATACAACTAAGGAAACCATCCCAGAAGAAACGGCTTCTTCTACTGCACATTTATGGGAAAAGAAGGATA
9	79933268	79933388	VPS13A	121	CAAAGACTTTAAAAATGTGGTTTCTTGAAGAATCAAATGAAACTGAAAAAATAGCTCCCACAACTGAATTGGTACCCAAAGGCGAGATGATAAAAATGAACATTGATTCTATTTTTATAG
9	79933388	79933508	VPS13A	121	TTCTTGAGGCTGGAATTGGTCATAGAACAGTACCTATGCTTCTGGCAAAGTCACGTTTTTCAGGGGAAGGCAAAAACTGGAGTTCCCTAATAAATCTGCACTGTCAGCTTGAGCTAGAAG
9	79934478	79934598	VPS13A	121	TCTCTGTAGGTGCATTATTATAATGAAATGTTTGGTGTATGGGAGCCTTTGCTTGAACCCTTAGAAATTGATCAGACTGAGGATTTTAGACCATGGAATCTTGGTATCAAGGtatatcta
9	79936044	79936164	VPS13A	121	TTAGAATTTTTCCTTATATTTCTATGATTTATCATTTTAGATGAAAAAGAAAGCAAAAATGGCCATTGTTGAGTCAGATCCTGAAGAAGAAAACTACAAAGTGCCAGAATATAAAACTGT
9	79936164	79936284	VPS13A	121	CATCAGTTTCCATTCAAAAGACCAATTAAACATTACATTATCCAAATGTGGTCTTGTAATGTTAAACAATTTAGTCAAGGTAAGAAAAGAAATTTGAAACTTTAAATATTGAGATACTTG
9	79936354	79936474	VPS13A	121	GTCATTTAATTTTACACATTTCATTTTATTTAGCATAACTCTTTCTTATTAGGCATTTACAGAAGCTGCCACTGGATCTTCAGCTGACTTCGTAAAGGATCTAGCACCATTTATGATTTT
9	79936474	79936594	VPS13A	121	AAATTCCCTTGGACTTACTATTTCTGTTTCGCCAAGTGATTCTTTTAGTGTACTCAACATTCCTATGGCAAAATCATATGTATTGAAAAATGGAGAAAGTTTAAGTATGGATTATATCCG
9	79936594	79936714	VPS13A	121	AACCAAGGACAATGATCATTTCAATGCAATGACCAGCCTAAGCAGCAAACTCTTCTTCATTCTTCTTAGTAAGTAGTTGAAAAATTACCTTCCTGGGGCTATTTTGTTTTAAATTACAAT
9	79937942	79938062	VPS13A	121	AATTATAATAAAAACTTTTAAACATACTTACTTAATTTAGCACCTGTTAACCATTCTACTGCTGATAAGATTCCTTTAACAAAAGTGGGACGACGTCTGTACACTGTAAGACACAGAGAG
9	79938062	79938182	VPS13A	121	TCTGGCGTTGAAAGATCTATTGTTTGTCAAATTGATACAGTAGAAGGAAGTAAGAAGGTCACAATTCGCTCCCCAGTGCAGGTATGAAATGATCAATTTTGGGGGATGTCCTGTTATGCA
9	79946917	79947037	VPS13A	121	TTTCCCAGATAAGAAATCATTTTTCAGTCCCACTGTCTGTTTACGAAGGGGATACCTTATTGGGAACTGCCTCACCTGAAAATGAATTCAACATACCATTAGGATCTTACCGGTATTTTG
9	79952132	79952252	VPS13A	121	TTAAAACATTTTAAACTGTATCATTTAATCTCATGCAGATCATTCATTTTTCTGAAGCCAGAAGATGAGAACTATCAAATGTGTGAAGGAATTGACTTTGAAGAGATTATAAAAAATGAT
9	79952252	79952372	VPS13A	121	GGTGCTCTTCTAAAGAAGAAATGTAGATCTAAAAACCCTTCTAAGGAATCATTTCTCATTAATATTGTTCCAGAAAAAGATAATTTAACATCTCTATCAGTGTATTCAGAAGATGGTTGG
9	79952372	79952492	VPS13A	121	GATTTACCATACATAATGCATTTGTGGCCACCTATCCTGCTCCGAAATCTTCTTCCTTACAAAATTGCTTATTATATAGAGGTATCGGCAAACTGATTTAGTGCCTTCCTGTTTTTGATT
9	79954389	79954509	VPS13A	121	AACattttaaattttgttttgttttttttttttttattaCAGGGAATTGAAAATTCGGTTTTTACTCTAAGTGAAGGACATTCAGCCCAGATTTGTACTGCACAGTTGGGTAAAGCCAGG
9	79954509	79954629	VPS13A	121	CTACATTTAAAATTACTTGACTATCTCAATCACGATTGGAAAAGTGAATATCACATAAAGCCTAATCAGCAAGACATTAGTTTTGTCAGTTTTACTTGTGTTACAGAAATGGAAAAGACT
9	79954629	79954749	VPS13A	121	GATTTAGATATTGCTGTCCATATGACTTACAATACTGGTCAGACAGTTGTGGCATTTCATAGTCCTTATTGGATGGTCAATAAAACTGGCCGCATGTTACAGTACAAAGCAGACGGAATT
9	79954749	79954869	VPS13A	121	CATCGAAAGCATCCACCTAATTATAAAAAGCCAGTTCTCTTTTCTTTTCAGCCAAATCACTTTTTTAATAACAATAAGGTATGCGATGTTTATTCTGTTTTTCCCTTGTCTTTAGCTACT
9	79955085	79955205	VPS13A	121	TTTCCTAGGTTCAACTTATGGTAACTGATAGTGAGTTGTCCAATCAGTTTTCAATTGATACTGTTGGTAGTCATGGAGCTGTTAAATGTAAAGGCCTGAAAATGGACTATCAAGTGAGTT
9	79955273	79955393	VPS13A	121	GATGTTATACATAACAGTTTTTGAGCTGTTAATTTTTTTTTCTTAGGTTGGTGTCACTATAGACCTGAGCAGTTTTAACATTACTAGAATTGTGACATTTACCCCTTTTTATATGATTAA
9	79955393	79955513	VPS13A	121	AAACAAAAGCAAATACCATATATCAGTGGCTGAAGAAGGAAATGATAAATGGCTCTCTCTTGATTTGGAGCAGGTGGGTAGATGAATTTCAAAAATATACCTCTTTGGATTCTATTTTCT
9	79959012	79959132	VPS13A	121	ATATATTTATGGTGAAATCTGTTTATTTTTATAAACATATATAATGTATATTTTAGTGTATCCCCTTTTGGCCTGAGTATGCTTCTAGTAAACTTCTTATTCAAGTCGAAAGGAGTGAAG
9	79959132	79959252	VPS13A	121	ATCCTCCCAAAAGGATATATTTTAACAAGCAGGAAAATTGTATTCTATTGCGTCTAGATAACGAGGTAAGTTTTTTTTTCTTTTTTGCATGTGTCATTAGGAAAGCTAAAATATACTGAC
9	79959871	79959991	VPS13A	121	AATATTCTTGGGAAAATGATTACATTAAAATGTTTTCTTTTTCTTTCTTCTAGCTTGGAGGTATTATAGCAGAAGTGAATTTGGCCGAGCATTCTACAGTTATTACATTTTTAGATTATC
9	79959991	79960111	VPS13A	121	ATGATGGAGCAGCTACATTCCTCTTAATAAATCACACAAAGAATGAACTTGTTCAATACAATCAAAGGTAAGATTATCACAAATACAGTAACTCTTGATGGTGTAAGTCTAGATGATGAG
9	79966177	79966297	VPS13A	121	TAATCTCTTCGTGTACTTGCATTTAATTTAACGCGTATTTTTGCTACTGTGTCAGTTCTCTCAGTGAAATAGAAGATTCCCTCCCTCCTGGTAAAGCCGTGTTTTATACATGGGCTGATC
9	79966297	79966417	VPS13A	121	CGGTGGGCTCTAGAAGGCTGAAGTGGAGATGTAGAAAAAGCCATGGTGAAGTAACACAGAAGGATGTAAGTATTGGGTTATTATGGTGTTCCCAGCAGCCTTTTTTAAAAAAGGTATTTG
9	79968320	79968440	VPS13A	121	CTAGGATATGATGATGCCTATAGATTTGGGGGAAAAGACAATATATTTAGTTTCATTCTTTGAAGGTTTACAACGCATTATTTTATTCACTGAAGATCCAAGGGTATTTAAAGTAACATA
9	79968440	79968560	VPS13A	121	TGAAAGTGAGAAAGCAGAGTTAGCAGAGCAAGAAATTGCAGTGGCATTACAAGATGTTGGAATTTCTCTTGTCAACAATTACACGAAGCAAGAAGTAGCCTATATAGGCATTACAAGGTT
9	79971586	79971706	VPS13A	121	TAACTTAGTATTAAATACTATGATTTTTGCTTTCTTAAATAAGTTCTGATGTGGTTTGGGAAACAAAGCCCAAGAAGAAGGCAAGATGGAAGCCAATGAGTGTAAAGCACACTGAGAAGT
9	79971706	79971826	VPS13A	121	TAGAGAGAGAATTTAAGGAATATACTGAATCTTCTCCTTCAGAAGATAAGGTTATTCAGTTGGACACTAATGTTCCGGTAATATTTTTAAGTACTGATGTGAAGTTTTAATTTTTTGCCT
9	79972561	79972681	VPS13A	121	TTTATAGATAAATTAATTTTTTCATTTGGGGGGACATATTTTTCAGGTTCGCCTAACCCCTACTGGTCATAACATGAAAATTCTGCAGCCGCATGTAATAGCTCTACGAAGAAATTATCT
9	79972681	79972801	VPS13A	121	TCCAGCATTAAAAGTGGAATATAACACATCTGCACATCAATCATCATTTAGAATTCAGATTTACAGAATACAGGTAAGTCTTTCTGAAAATATAGGCAAAATTGTATTCTAAAGGAATGC
9	79973253	79973373	VPS13A	121	TGTGTTTTTATTTTCTTAGATCCAAAATCAGATACATGGTGCTGTATTTCCCTTTGTGTTTTATCCTGTTAAACCTCCAAAGTCGGTCACCATGGATTCAGGTTTGTTTTTATTTTTAGA
9	79974223	79974343	VPS13A	121	GTAATTATATTTATAACCTTTACAGCACCAAAGCCCTTTACAGATGTCAGTATTGTCATGAGATCTGCAGGACATTCCCAGATATCACGTATTAAGTAAGTGTCTTAATACATTTCTTGT
9	79975444	79975564	VPS13A	121	AATACAGGTATTTCAAAGTATTGATTCAAGAAATGGATCTCAGGTTAGATCTTGGGTTTATCTATGCTTTAACAGACCTTATGACAGAAGCTGAGGTGACTGAAAATACAGAGGTAAGAC
9	79980372	79980492	VPS13A	121	TAGGTTGAGCTTTTTCATAAAGATATAGAAGCTTTCAAAGAAGAATATAAAACAGCCTCATTAGTAGATCAATCACAAGTCAGCCTCTATGAATATTTTCATATATCTCCTATCAAGGTA
9	79981595	79981715	VPS13A	121	CAATATGAAGAAAATACTTTTAAATATTTATCTCTTTATCTTTTTAGTTACATTTAAGTGTTTCACTGAGTTCCGGCAGAGAAGAAGCTAAAGATTCAAAACAAAATGGAGGACTGATTC
9	79981715	79981835	VPS13A	121	CAGTTCATTCTTTAAATCTTTTGCTGAAGAGTATTGGTGCCACACTGACAGATGTACAAGATGTAGTTTTTAAGTATGTTTAGTATTCAAATCTGTAAATTGATGGAAATATTTCTATTT
9	79982951	79983071	VPS13A	121	ATTTTTACGCTTTTTTCAGGCTTGCATTTTTTGAACTCAACTATCAGTTCCATACAACATCCGATCTACAGTCTGAAGTCATAAGACACTATTCAAAACAGGTTTGTCTAAGATTATATT
9	79984211	79984331	VPS13A	121	TAGGCCATTAAGCAGATGTATGTACTCATTCTTGGACTTGATGTTTTGGGAAATCCATTTGGCTTAATTAGAGAATTTTCTGAAGGTGTAGAAGCATTTTTTTATGAACCTTACCAGGTA
9	79985150	79985270	VPS13A	121	TATTTACTATTTGGCCCTTTAGGGAGCCATCCAGGGTCCTGAAGAGTTTGTGGAAGGAATGGCACTAGGACTTAAGGCACTAGTTGGTGGAGCTGTTGGTAAGAAACAGAATATCTACCA
9	79985292	79985412	VPS13A	121	ATGGCATCATTACTTTTACTAAAGATAATTTCTGTCAGGTGGATTGGCTGGTGCTGCCTCCAAAATCACCGGTGCTATGGCTAAGGGGGTAGCAGCTATGACCATGGATGAAGACTACCA
9	79985412	79985532	VPS13A	121	ACAGAAGAGAAGAGAAGCCATGAATAAGCAACCAGCTGGTTTTAGAGAAGGCATCACTCGTGGAGGAAAAGGCTTAGTTTCTGTAAGAAATTTCACAGGGTTGTGAAGATTTTGGGAAAT
9	79985760	79985880	VPS13A	121	ATCATAAAAAAGTATTGTAAATTTTCAGTTGTGTTTTCCTTCTAGGGATTTGTTAGTGGCATAACAGGAATTGTTACAAAACCAATCAAAGGCAAGTATAGTAGTTCCTTTGCAAGTCTT
9	79985883	79986003	VPS13A	121	AAGTTGATTCTGTTTTCATTCTTGGATGCAATTGTCAAAAACTCTTTTTTCTTTCCAGGAGCTCAAAAAGGAGGAGCAGCTGGTTTCTTTAAAGGTGTTGGGAAAGGTTTAGTAGGAGCG
9	79986003	79986123	VPS13A	121	GTAGCAAGGCCAACTGGAGGCATCATAGACATGGCTAGCAGTACATTTCAGGGAATAAAAAGGTAAATCCTCTTTGGTGTAAGATATGAGTTAAAATGCTGAAGCCATGAGAAATGGAAT
9	79996887	79997007	VPS13A	121	CTAGAGCTACAGAGACTTCTGAAGTGGAGAGTCTGCGACCTCCTCGGTTCTTCAATGAAGATGGAGTTATCAGACCGTACAGGTTGAGGGATGGGACTGGAAATCAAATGTTACAGGTAA
9	79997138	79997258	VPS13A	121	TACTTAGATTTTAAAGTACATTTATTTACTATAAGATTTTTTTTTCTTTTTTACAGGCATCAAAAAGTTTGATATGAAAAGTTAATGCATGACTTTGCAAGTGAAAGCCAACAGTAGATT
9	79997258	79997378	VPS13A	121	TTAGTCTTAAAATTTACAAACTACGTACAGCTGTTTCAGTATTTTGAATACAAAGAAAACCTTTTGTATTGGTAACTTTTAATAGGAATTTTAATGAATCTGGTTTTTTTATAGGGTGTT
9	79997378	79997498	VPS13A	121	CTTAGTTCTGCACTGGATTTGCTAGATTTGTTGGAAGCCTTTGTACCTTATGTATCCTCGTCATTGGTGGTACTTACTTAACCAATTAAACCATTTCTGTTGTGGGGTTATTAAACCACT
9	79997498	79997618	VPS13A	121	GGTAGCTTTTATACCAGATATATAATCCTTATATCCAATTACACATGAAGAAGGAAAAGCAAAACTCAGGAACACTGCTATTGTGAATTACTCTTGGATTCTTGTGCTTTGCCTTTGAAA
9	79997618	79997738	VPS13A	121	ATGCTTAAATGGCCATGACCCTCTTCCTGCTTTATTCTAGTGTAGTCTTTATAAAACTTGTGGGATTTGATAAGCAGTTCACATGCAAACCAGTATCTTTTAATAATACAAAGTAGCATC
9	79997738	79997858	VPS13A	121	TGGAACAATAGACAGTTTGAAGTTAGAATCTGCTTAGACAACTTTCTTACTTGGTAAATTCGACTTTTTAAAACCTGGATTATGCTGTAGGTAACTAGTAATCATATATAGGCTATACCA
9	79997858	79997978	VPS13A	121	GTGTCATGTTGTTTCTGTGGTTTAGAGGTGGAATACTAAATTAAATCATTTGTTTGAAAACAAACAAGGAATCATTATGTTATGTAGGCTTGCAGATACTCATGGTAGCAATAAACTGTT
9	79999444	79999564	VPS13A	121	AATTTGCCATACTCTACTAACCTTTGTGCTTCTTTTTTCCTTTGCCATGCTTACAGAAAATTCAATTCTACAGGGAGTGGATTATGACTCACAGTAGCAGTAGtgatgatgatgatgatg
9	79999564	79999684	VPS13A	121	atgatgatgatgatgaGTCAGATCTAAACCATTAAAATTCATATGTTCTTTATTTTACTTGGAATGTTTCATTAACATGTTTTGTATGACTTATACCATAATGCCCATATGTCCATTTAT
9	79999684	79999804	VPS13A	121	AGGGAGGTAAAACACATTTTCTTTTAAAATGTTTTCCTACACATTTTCATAAAGCAAAATAATTGTATTATTTAAGCACAGAAAAAAATGTATCTTACATCCAAAGTAGGGAGGGCATCC
9	79999804	79999924	VPS13A	121	AACATATTATAGATTTGCTTTTATATATTTTATAGCTTTGTATTGCATAGTTTGTCTTTAAGAGTTCAAGTTAGACTTAAATATAATTTTGATGTTCACTGGTTTTATTTTAAATTGCCT
9	79999924	80000044	VPS13A	121	TCTTATTTGTTAGCAAAATGCCTTTTTTTAATGGTCTCTGTAAATTTTCTGGGCTTTAATGTAATGCCACTGTGTAAAAAAAAAGGAAGAAAATAGTAATAGCCatttaatgttttatat
9	80000044	80000164	VPS13A	121	ttatcattttaaagatatttttgtcaaatttcttttaataataataaaCATATGTAATCTAAAGGAGTGTGAATTTGTTGTTCTATCCCCAAATCATATAGATTGAACTGCTATTATAAA
9	80004949	80005069	VPS13A	121	CCTTTACTTCAGGAGGAGAATGACTACTAATCTGGAAGAAAGGTCTTACTATAGCAGTCAGATCACCAGAGTAGTGCCGAACACTTCCTGGCTTCATCTGAAAATTTGAGTAAGTGGACA
9	80018134	80018254	VPS13A	121	TCACTTTTTTCTTTTAGGTCATGGAAAATGGAAGATTTGCAAAATACAAATATTTTACCCATGTCATGATCAATAAGACAGATATGCTAATGATAACCAGACGGTAACTTGCTTTCTTTC
9	80020721	80020841	VPS13A	121	attggatATAAGTGCCTCAATTTTAAAGCGAATTCTTTTTTTGTTTTTCTTTTTGCAGTGGTGTATTGTTTGTAACAAAGGGAACATTTGGACAACTCACGTGTGAGTGGCAGTATAGTT
9	80020841	80020961	VPS13A	121	TTGATGAATTTACCAAAGAGCCATTCATTGTTCATGGGAGAAGATTGCGCATTGAAGCAAAGGTATGTTGAATAGATTTATTTTTTGAAAACTTGGAACTGAAAATAATGCTTTGAAGTA
9	80022426	80022546	VPS13A	121	AATTTACATATTCTGTTTATAGGAACGAGTGAAGTCTGTATTTCATGCCAGAGAGTTTGGAAAAATAATTAACTTCAAGACCCCAGAGGATGCCAGGGtaaatataataaatcttttatt
9	80030837	80030957	VPS13A	121	AGTAAGCAAATGTTCATTTATTTTCCCACCGCAGTGGATCCTCACAAAGCTACAAGAAGCAAGAGAACCTTCTCCGAGCCTCTGACAGAGAACACTGCCTGAAGACACACAGCAATAAGT
9	80409429	80409549	GNAQ	121	AAACATGATAGAGGTGACATTTTCAAAGCAGTGTATCCATTTTCTTCTCTCTGACCTTTGGCCCCCTACATCGACCATTCTGCAAGGTTAACAATACTCATATTAATAACATATAAAGTA
9	80409429	80409429	GNAQ	1
9	133738289	133738345	ABL1	57	CAACTACGACAAGTGGGAGATGGAACGCACGGACATCACCATGAAGCACAAGCTGG
9	133738345	133738409	ABL1	65	GCGGGGGCCAGTACGGGGAGGTGTACGAGGGCGTGTGGAAGAAATACAGCCTGACGGTGGCCGT
9	133747497	133747580	ABL1	84	GTTTTTTTCCTTCTGCAGGAGGACACCATGGAGGTGGAAGAGTTCTTGAAAGAAGCTGCAGTCATGAAAGAGATCAAACACCC
9	133748228	133748335	ABL1	108	TCGTTGTCTTGTTGGCAGGGGTCTGCACCCGGGAGCCCCCGTTCTATATCATCACTGAGTTCATGACCTACGGGAACCTCCTGGACTACCTGAGGGAGTGCAACCGG
9	133748335	133748455	ABL1	121	CAGGAGGTGAACGCCGTGGTGCTGCTGTACATGGCCACTCAGATCTCGTCAGCCATGGAGTACCTGGAGAAGAAAAACTTCATCCACAGGTAGGGGCCTGGCCAGGCAGCCTGCGCCATG
9	133750268	133750346	ABL1	79	GAAACTGCCTGGTAGGGGAGAACCACTTGGTGAAGGTAGCTGATTTTGGCCTGAGCAGGTTGATGACAGGGGACACCT
9	133750346	133750388	ABL1	43	ACACAGCCCATGCTGGAGCCAAGTTCCCCATCAAATGGACTG
9	139390478	139390598	NOTCH1	121	CGAAGGCTTGGGAAAGGAAGCCGGGGTCTCGTGGGGCGCGCCGTTTACTTGAAGGCCTCCGGAATGCGGGCGATCTGGGACTGCATGCTGGTGGGAGGGCTGGAGACGCCCTCGGACCAG
9	139390598	139390718	NOTCH1	121	TCGGAGACGTTGGAATGCGGGGACGAGCTGGACCACTGGTCAGGGGACTCAGGGGACGGGGTGAGGAAGGGGTGCTCAGGCACCTGTAGCTGGTGGCTGGGGGTGTTGTCCACAGGCGAG
9	139390718	139390838	NOTCH1	121	GAGTAGCTGTGCTGCGAGGGGGGCGTCAGGAACTGGGCTGCGGTCACGGGTGGGACCAGCGAGGATGGCAGCGACGTGGGCAGGGCGGGGCTCTCCTGGGGCAGAATAGTGTGCACCGCC
9	139390838	139390958	NOTCH1	121	AGGCTGCTGGGGCCCAGTGGCTGCACGTCTGCCTGGCTCGGCTCTCCACTCAGGAAGCTCCGGCCCAGGTGGCCGCTGGCTGCTGAGCTCACGCCAAGGTGCGGCTGTGGTGGTGGTGGT
9	139390994	139391113	NOTCH1	120	GGCTGCAGGTTCTGCTGCTGCATCTGTAAGTTTTGTGGCTGCACCTGCTGGGTCTGCACCAGGTGAGGCTGGGTGGCCAGCCGGGTGCTGGGCAGGCCCTGGTAGCTCATCATCTGGGA
9	139391113	139391233	NOTCH1	121	CAGGGCGCTGGCAGCAAGGCTACTGTGCAGCGGGCCTACCATGCCATGCTGCAGGGAGGGGGCCTGTGTGCTCAGGGGGCCTGGTGCCACACTCCCCCGCAGAGGGTTGTATTGGTTCGG
9	139391233	139391353	NOTCH1	121	CACCATGCCGCTCTGCAGCCGGGACAGCCACTCGCATTGACCATTCAAACTGGTGGACCCGCCCACAGTGAAATTCAGGGCCCCTCCGCTGCTGGAGCCCAGGACGGTGCTGGTGCCAGA
9	139391353	139391473	NOTCH1	121	GGCCACAGGCAGGTGGGAGAGACGAGGTGGGCCAGTCTCAAAGGCCAGCCGGCCGCCCCCACCCAGCGCCGCCATCTCGGGCTTGGCCGCCACGTTCAGGTGCCCGATGCCCAGGTGGGT
9	139391473	139391593	NOTCH1	121	GTCGGGCATCCCAGGCAGGTGGTTGAGGGGCACGGACGGAGACTGCTGGAACGGGGAGGGCAGCAGTGGCGGCGAGGCCACGTCTGACAGGTAGCCATGGGGTGACTCCAGGGAGTCCAC
9	139391593	139391713	NOTCH1	121	GGGCGAGAGCATGCCGGAGCTGTCCAGCAGGCAGCCCTTGCCGTCCTGGGACTTCTTCCTCCGTGCCTTGAGGTCCTTGGCCTCCTTGCTTCCACAGGCCAGGCCTTTGCTGCTGGGCTT
9	139391713	139391833	NOTCH1	121	GCGGACCTTCTTGCCCTGCACGCCGGGCTTGAGGCTGCCCAGGTAGCCGTTGGGCGAGCAGAGCGGGGGCGACAGGGTGGGCGTGCCCCCCAGCGGGGCTCCGTGCAGCTGCGGGCTGCG
9	139391833	139391953	NOTCH1	121	CACCAGGTTGTACTCGTCCAGCAGCCTCACGATGTCGTGATGCATGCGCTCCTGTGCGATGTCGCGCGGCAGGCGGTCCATATGATCCGTGATGTCCCGGTTGGCAAAGTGGTCCAGCAG
9	139391953	139392073	NOTCH1	121	CACCTTGGCGGTCTCGTAGCTGCCCTCCCGGGCGGCCAGAAACAGGGGTGTCTCCTCCTGGGGGATGAGGGCGGGGGCCGGTGAGGGGGGCCAGGCCAGGCGTGGGGACCCTCCCCAAGG
9	139393339	139393459	NOTCH1	121	CTCGCGCTCACCCTGTTGTTCTGCATATCTTTGTTAGCCCCGTTCTTCAGGAGCACAACTGCGGCATCCACATTGTTCACGGCGGCGGCCCAGTGCAGGGCGGACTTGCCTGCGTGAAAG
9	139393517	139393637	NOTCH1	121	GGCGGTCCCGCCCCACGACAGAGCAGCCGTGCCCCCGTGGGCTCACCCAGGTCATCTACGGCGTTGACGTCGGCGTGTGAGTTGATGAGGTCCTCCAGCATGCCCTCCACGGCCAGGCGG
9	139393637	139393757	NOTCH1	121	GCAGCCAGGATCAGTGGCGTCGTGCCATCATGCATGCGGGCATCCAGGTCTGTGGCTCGGTTCCGGATCAGGATCTGGGCAACAGGGAGAGGCTCAGGCGGGTGCTGGGCAGACGTACAC
9	139394971	139395091	NOTCH1	121	GGCAGGTGGGCACACAGGCAGCCACTGCCTACCTGGAAGACACCTTGTGCGTCGGCAGACACAGCCGCATGCAGCGGGGTGCGGCCCATGTTGTCCTGGATGTTGGCATCTGCGCTGGCC
9	139395091	139395211	NOTCH1	121	TCCAGCAGGCGCTTGGCGGCATCAGAGCGTGAGTAGCGGGCGGCCAGGTGCAAGGCGGTCTCGCCCGTGCGGTCTGTCTGGTTGTGCAGGCTGGCGCCCTGGTAGATGAAGTCGGAGATG
9	139395211	139395331	NOTCH1	121	ACGGCCGGCGCGTCCTCCTCTTCCTCGCTGTTGCCCGTCTCCAGGCCGCCCCCGCTGCAGGAGGCGATCATGAGCGGGGTGAAGCCATCTGCAGAGGCAGAGACGGGTGCTCAGTCTGGA
9	139396162	139396282	NOTCH1	121	ACGGGGCTAGGGAAGCCCTGGCTGCTGGCACCCTTACCAGGCCCGCGGACATTGACGTCCATGCAGTCGGCGTCAACCTCACCCTGGGGCGGTGTGGGGGCCATGGCAGACATGCGCAGG
9	139396282	139396402	NOTCH1	121	TCAGCGGCATCCAGGTGCTGCTGAGTCCACTGCCGGTGGTCTGTCTGGTCGTCCAGGTCAGGCAGAACCACGGGCTCCTCGAACTACATAGAGGGAGTGAGCAGAGCCTGTCAGGGCAGC
9	139396436	139396556	NOTCH1	121	GAGCCTCGCGACTCACCCGGAACTTCTTGGTCTCCAGGTCCTCGTCCCCCCACTCATTCTGGTTGTCGTCCATGAGGGCACCGTCTGAAGCGTTCTTCAGGGGCCTGGGGGGTGAGGGGT
9	139396712	139396832	NOTCH1	121	CGTCCGCTCACTTGAGGCCCACGGAGTCCTCGCCGAGGGGCTCCCGCCGCTTCTTCTTGCTGGCCTCAGACACTTTGAAGCCCTCAGGGAACCAGAGCTGGCCATGCTGCCGCCGGCGCT
9	139396832	139396952	NOTCH1	121	TGCGGGACAGCAGCACCCCGCAGCCCACGAAGAACAGAAGCACAAAGGCGGCCGCCGCCACGTACATGAAGTGCAGCTGCGCCGGCGGGGGCGGCTCCACGGTCTCACCTGCGGGCACGG
9	139397588	139397708	NOTCH1	121	ACCCCCTGCAGGCAGAGCCTGTTCCCGGGATGGGGCCACACTTACTCTGCACGGCCTCGATCTTGTAGGGGATGTTGAGGCTGCCCAGCGAGGCGAGCGCTCCCAGGAATGCGGCCACGT
9	139397708	139397828	NOTCH1	121	CGGTGGCACTCTGGAAGCACTGCGAGGAGGCCTGCACACACTGCCGGTTGTCAATCTCCAGGTAGACGATGGAGCTGGGCGGACAATCAGAGAGGGGCTGGGACCCGAGGCTTCCTCCTC
9	139399100	139399220	NOTCH1	121	CCGTGGGCGCCGGGTCTCACTCACCCGCGGACGTCCATGGGGTCCAGCTCCCTCCGCCGCCGCCCACCCTCGCTGCCACCAGGGAGCAGCGAGGCCTTCACCTGGCCCAGCAGGGCGTCA
9	139399220	139399340	NOTCH1	121	GGTGCGGCCCAGCCCTCGGCGGCACGCTTGATGGGGTGCTTGCGCAGCTCCTCCTCGCGGCCGTAGTAGGGGAAGATCATCTGCTGGCCGTGTGCGTCACGCTTGAAGACCACGTTGGTG
9	139399340	139399460	NOTCH1	121	TGCAGCACGCGGCTGAGCTCCCGCAGGAAGTGGAAGGAGCTGTTGCGCAGCTGCTCCGGCGGCATCAGCACCACCACCACCAGCGTGCCGGCCGCCAGCCTCTCGGGTACATGCTCCGCA
9	139399460	139399580	NOTCH1	121	CAGTCCAGCCCGTCCCACTCGCACTCCGCGCTGTTGCAGCCCTGGTCGCAGTGCCCGTCGCTGAAGTGGTCCTTGCAGTACTGGTCGTACAGGGGGCTGTGGGGGGCGGGACACGCTCAG
9	139399747	139399867	NOTCH1	121	CCCCGCAGCCTTACTTGCACTGGCCTTCCGCACGCTGGCAGTCAAAGCCGTCGAAGAGGCAGCCGGCTGAGTTGCACTGGCTGTCACAGTGGCCGTCACTGAAGTACTTCCAGCACTGCA
9	139399867	139399987	NOTCH1	121	GAGACTGCGTGCAGTTCTTCCAGGGGTCATTGAAGTTGAGGGAGCAGTCACCGCCGTCCCAGCCGCACGCGTGGTTGTTGCACTGCAGGCTGCAGACCTTGTTGCCCGCGTCCTCCTGGC
9	139399987	139400107	NOTCH1	121	ACTCGGGCAGCTCGCACGCCTCCTCGATCAGCGGCGGGGGGATGTCGCGCCCGGCCCCACCCCCGAAGCTGTAGTCCAGGATGTGGCACAAGAGCCCGTTGAATTTGGCGGGGCACAGGC
9	139400107	139400227	NOTCH1	121	AACGGTAGAAGGGGCTCTCGGATGTGGGCTCACAGGTCCCCTGGTTGTAGCAGGGGTTGCCGCCCAGGCAGGGGCTGCTGGCCGGGAACTGGCATTCGGGGCCCGTGAAGGGGCCCAGGC
9	139400227	139400347	NOTCH1	121	ACAGGCAGGTGGGGCTGCGCGGGCCGGAGATGCATGTGCCGCCGTTGAGGCAGCGCAGGCTGCCGCAGGTACGAGCGTCATTCTCACACGTGGCGCCCTCGAAGCCCTGCCCGAGAGGGA
9	139400975	139401095	NOTCH1	121	TACCGCAGGGCACTTGCAGATGAACCCGCGGGCGGTGTTGGAGGCCACGGCGCAGGTGCCCCCATTCTTGCAGGGCTTGCCTTTGCAGCCATTGATGACGGACTCGCAGCGGCGCCCTAG
9	139401116	139401236	NOTCH1	121	AGGCTCACCCTGCTGCCCCACACGCCCCACCCGCCTGGGCGCGGCACCCACCGGTGTGACCAGCACGGCACTCGCAGTGGAAGTCATTGACGCGCTGCACGCAGTTCTGGGTGCCACGGG
9	139401236	139401356	NOTCH1	121	CGTCGCAGGGATTGGACAGGCACTCGTTGACATCCCCCTCACAGCGCTCACCCACGAAGCCCGGCGGGCAGGTGCAGCTGTAGCCGCCCACCTGGTCCACGCAGGTGCCGTTGTTAAAGC
9	139401356	139401476	NOTCH1	121	ACTTGGGGCTCCGGGACACGGGGTCAACGGGGGGATTGCAGTCGTCCACGTTGATCTCACAGTGCACACCTGCGGGGCCAGGTTTCGTCAGTGGCCCAAGCCCGCCACACCCCGGCCCTG
9	139401703	139401823	NOTCH1	121	CCCTGCCCTGGCCATGGATGGCCAACACCAGCCCTCCGTGCAGCGGCCCTTACCCTGAGTGCCCCGTGGGCAGGAGCACTTGTAGGTGTTGGGGAGGTCGAGGCAGGTGCCCCCGTTCTG
9	139401823	139401943	NOTCH1	121	GCAGGGGTGGGAGAGGCACTCGTCGATCTCCTCAGAGCAGTTCACCCCGTGGTAGCCGGCCACGCACTGTGCAGGCGACAGAACGAGGGGCCCTTCGGCTCAGCCGGCGCCAGGATGCAG
9	139402379	139402499	NOTCH1	121	AACCCTTACCCTAGGAGGGACCCCCACCTTGCAGGAGTAGCCGCCCAGGTAGTCCGTGCAGGTGGCCCCGTTCTGGCAGGGGCTGGGTGAGCACTCGTCCACCAGGTCCTCACAGTAGCT
9	139402499	139402619	NOTCH1	121	GCCTGTGTAGCCCGCCTGGCAGCGGCAGTGGTGCGTGTTGCCCGCGTCCACACAGAGCCCTCCATGCTGGCACAGGCGGGCAACGTCAACACCTGCGGGGGATGGGGTGGTAGACAGGTG
9	139402640	139402760	NOTCH1	121	CTTGATGGGCTGGGACCCGAGCTGGGTGGGCACAGCAGGTTACCTTGTCGCTGCGCAGCCACCTCACAGGACACGCTGGGCACGTCGCAGTAAAGGCCGGTCCAGCCGCTGGGGCACTCG
9	139402760	139402880	NOTCH1	121	CAGCGGTACTGGGTGTGGGTCTGCCAGCATTTGCCGCCGTTCTTGCAGGGCGAGGAGTCACACCAGTGCACAAGGTTCTGGGGACAGATTGGGGTCAGCTGGGTGCCCGCGCCCCGGCCA
9	139403302	139403422	NOTCH1	121	CTGTGGCCGGCGCACTCACCTGGCAGTTGGGGCCAGTGTAGCCCTGGGGGCAGGTGCACCTGTAGGAGCCGCAGCCGTCCTGACAGGTGCCGCCATGCAGGCAGGGCTGTGAGTCGCACT
9	139403422	139403542	NOTCH1	121	CATTGACATCGTGCTGGCAGTAGCTGCCCGTGAAGCCGGGTGGACACAGGCAGGTGAACGAGTTGATGCCGTCCACGCAGGTGCCACCGTTGAAGCAGGAGCTGCAAGGGGGTGGGCAGG
9	139404179	139404299	NOTCH1	121	CACACCTCTCTGTGCAGTCAGGCGTGTTGTTCTCACAGTGGATCCCGCTGAAGCCTGCGGGGCAGGTGCACGTGTAGCTGTCCACGCAGTCCGTGCAGTTGGCCCCGTTGCGGCAGGGGT
9	139404299	139404419	NOTCH1	121	CACTGGCACACTCGTTGATGTCCTCCTCACAGAAAGTGCCCCGGAAGCCGGGCAGGCAGTCGCAGAAGGCCGTGTTGATGCCGTCTGTGCAGGAGCCCCCGTTGTGACACGGGTCTGGGA
9	139405061	139405181	NOTCH1	121	CTGAGAGCTTCCTGGAGGAGGCCAGAGCCGCGGGGCTACTCACTGGGCCGGCAGTCGTCGATGTCGGTCTCGCAGTTGCGCCCACTGTAGCCGGCCTGGCAGTGGCAGCGGTAGCCGCCG
9	139405181	139405301	NOTCH1	121	TGGGTGTTCTGGCAGGATGCGCCGTGCCGGCACGGGCTCAGAACGCACTCGTTGATGTCGACCTCACAGGTCTGCCCTGCGGGGCAGGAGGAGGCCGGTTGGTCACCAGCGGCCCCTGGC
9	139405543	139405663	NOTCH1	121	GTGTCCCGCAGACATCCTGACCTCCCATCCCAGCCCTCACCGGGCCCTGGCCAGCCTCACCTTGCCAGCCCGTGGGGCAGACACAGGAGAAGCTCTCATAGTCCTCGGATTGCCTGCACT
9	139405663	139405783	NOTCH1	121	CCCCGCCGTTTCTGCAGGGGCTGGGGGCACACGGGGCCAGCACCACCTCACACGTGGCACCTGCGGGAAGGAGACACACGTGACCCCGGGAGCCTCACCCAGAGGGATCTCCCAAATCGG
9	139407469	139407589	NOTCH1	121	CACCTGTGTAGGGCAGCAGGCAGTTGCACTTGTACCCGGCAACGTCGTCAATACACGTGCCCTGGTTCAGACATGGGTTGGACGCACACTCGTTGATGTTGGTCTGGCAGTTGGGACCTG
9	139407796	139407916	NOTCH1	121	AGACTCGAGGGCGGCCCTCTGCACTGAGAAACGCGCAGCCCACTCACCGCTGAAGCCCTCCCGGCAGGTGCACACGTAGCCACTGGTCATGTCTTTGCAGGTGCCGCCGTTGACACAAGG
9	139407916	139408036	NOTCH1	121	GTTGGATTCACACTCATTGTTGTTGATGTCACAGTTGGTCCCACTCCACCCAGGGTCACAGTCGCACTTGTACCTGCAAGGGGGACCACACTGCAGGTCGAGGGAGGCCCGAGCAGCACG
9	139408938	139409058	NOTCH1	121	CCATGATCGGCCCCGCCGCATACCCGTTGAGGCTGTCCCGGCAGGCCCCGTGGACGCAGGGGTTGCTGTTGCACTCATTGACCTCAGACAGGCAGGTGGGGTCGTGGTAGCCCTCGGGGC
9	139409058	139409178	NOTCH1	121	AGCGGCAGGTGAAGCCATTGATGCCGTCCTCGCAGGTGCCCCCGTTGTGGCAGGGGTTGCCCGCACACTCATCGATGTTGATGTTACACATGCTCCCTAAGGGCAGGGCGGGTCAGACTC
9	139409737	139409857	NOTCH1	121	TCACCTGTGTAGCCCGGCTCACAGGCACACTCGTAGCCATCGATCTTGTCCAGACAGGTGCCCGAGTCGCAGGGGCTGCTGGCACAGTCATCCAGGTTGATCTCGCAGTTGGGTCCTGAA
9	139409931	139410051	NOTCH1	121	CACCTGTGGTCCCCTTCAGGCAGAAGCAGAGGTAGGCGTTGTCGCGGTCCTGGCAGGTGCCCCCGTGGCGGCAGGGCTGGCTGGAGCACTCGTTGATGTTGGTCTCGCAGTGGTGGCCCG
9	139410051	139410171	NOTCH1	121	TGTAGCCTGGGCGGCAGAGGCAGGTGAAGGTGGCGACGCCGTCCTTGCAGGAGCCGTAGTGGCAGGGGTCGGGGTCGCACTCATCGATGTCCACCTCGCAGTGCGTCCCCGTGTACCCTG
9	139410429	139410549	NOTCH1	121	CACCTTCCGTGCACACACAGGTGTAAGTGTTGGGTCCGTCCAGGCACTTGGCACCATTCTTGCAGGGGGTGCTGGCACACTCGTCCACATCGTACTGGCACAGATGCCCAGTGAAGCCTG
9	139411720	139411840	NOTCH1	121	CACCCGTGGGGCACTCGCACTGGAACTCATTGATCTTGTCCAGGCAGCGGCCATTGTGCAGGCAGGGGCTGCTGGCACACTCGTCTGTGTTGACCTCGCAGTGCACACCCTCGTAGCCTG
9	139412176	139412296	NOTCH1	121	TTCCCGCCCTGGCCCCGGCCGACGCACCGGGCATGCAGATGCACTGGAACTCCCCAATCTGGTCCAGGCAGGTGGCGTCGTTCTGGCACGGGTTCGAGACGCACTCGTTGACGTCGATCT
9	139412296	139412416	NOTCH1	121	CGCATCGGGGGCCCGTGTAGCCCTGCAGACACTGGCACTCGAAGGAGCCCAGCGTGTTGATGCACTTGCCCGCATGCTCGCAGGGGTTGGCACCTGGCGAGGGCACACGGGTGAGAGGCT
9	139412546	139412666	NOTCH1	121	CTGCCACCCCCACCTGGCCGCACCCCCTGTGCTGGCACCTACCCAGCGAGCACTCATCCACGTCCTGGCTGCAGGCCGGGCCCGTGTACCCCGAGGGGCAGGTGCAGATGGCCTTGCCAT
9	139412666	139412786	NOTCH1	121	TGACAGGGTTGGTGTCGCAGTTGGAGCCCTCGTTACAGGGGTTGCTGATGCATGCGTCGTTGAGGTGGCACAGCAGACCTGGGCAGGCAGCGGCGGTCAGTGGGCACGGCCCCTGGGCCA
9	139413039	139413159	NOTCH1	121	CACCTGTGCGGCCATGGGGACACTCGCAGTAGAAGGAGGCCACACGGTCATGGCAGGTGGCGCCGTGGAAGCAGGCGGCGCTGGCACAGTCATCAATGTTCTCGCTGCAGTCCTCACCAG
9	139413159	139413279	NOTCH1	121	TCCAGCCGTTGACACACACGCAGTTGTAGCCACCGTGGGTGTTGTGGCAGGTCCCGCCGTTCTGGCAGGCATTTGGCATCAGCTGGCACTCGTCCACATCCTCGGTACAGTACTGACCTG
9	139413835	139413955	NOTCH1	121	AGTAAGTGGGTAGCAGCCCCGCCCCGGCTACCCCGCCCTGCGGCGACCCGTATACGCGCCTGTCCACTCTGGCGGGCAGCGGCAGTTGTAGGTGTTCACGCCGTCCACACAGGCACCCCC
9	139413955	139414075	NOTCH1	121	GTTCTTGCAGTTGTTTCCTGGACAATCGTCGATATTTTCCTCACAGTTCTGGCCGGTGAAGCCTGCCGCAAGAGGGGCCGGGTCAGCCTCTTCCCTGAGGTCCAGTCCGGCTCCTGCCTG
9	139417290	139417410	NOTCH1	121	GGCAGCACTACCTGGCAGGCAGGCACACTCGTGGGTGACGTCGCCCGTGGGGCGGCAGGTGCCCCCGTTCTGGCAGGGCGAGGGGCTGCAGGGCACGTAGGGCCGCTCGCAGTTGGGGCC
9	139417410	139417530	NOTCH1	121	AGTGTGGGTGGCGCGGCAGACGCAGCGGTAGGAGCCGACCTCGTTGTGGCAGGTGCCTCCGTGGCGGCAAAGCCCGGGCTTCTGGCCACACTCGTTGACATCCTGCCGGCAGGTGGGGCC
9	139417530	139417650	NOTCH1	121	ATGGAAGCTGGGTGGGCAGTGGCAGATGTAGGAGGCCTCGAAGGGCAGGCACTGGCCACCGTTGGCGCAGGGGTTGGAGGCGCACGGGTCAGCCTGCTGGCACGATTTCCCTGGAGACAA
9	139418119	139418239	NOTCH1	121	GCGGCGGGCCTGGGTCTGCCCACCCCTCAGGCTGTGGGTCCTCCCTCACCTGACCAGCCGGGCGGGCAGCGGCACTTGTACTCCGTCAGCGTGAGCAGGTCGCAGGTGCCCCCGTTGCGG
9	139418239	139418359	NOTCH1	121	CAGGGGTTGGTGAGGCAGGCATTGTCCAGGGGTGTCAGGCAGAGGGGCCCAGAGAAGCCCAGGGCACAGCTGCAGGCATAGTCTGCCACGCCTCTGCGGTCCACCACGTGGCATGTCCCG
9	139418359	139418479	NOTCH1	121	GCGTTCTTGCAGGGGGTGCTGAGGCACGGGTTGGGGTCCTGGCATCGCGGGCCCACGAAGGCCCCGCCACAGCTGTTGGCAGATGTGCCAGGGCAGTTAGTTCCCACCTGCTTCCCCAGC
9	139438454	139438574	NOTCH1	121	TCCCGCAGGGGTGGTACTCACACGCAGGCCTCCGTGCCATTGGCCGCTTCACACTTCCCGCCATTCAGGCAGGTCTCACCGGGCTGGGAGCATCGCGGGCCTAGGCAGGGGCAGGAGAAG
9	139440148	139440268	NOTCH1	121	TGGGGGCTCGCGGGTGGGTGGGCGCCTACCTCGTGCGGCGAGCGCGGGCAGCAGCGCCAGGCAGAGCAGGGGCGCCAGGAGCGGCGGCATGCCTCCCCACCGGCTGCCCTCTGCGCCCGG
10	89624205	89624325	PTEN	121	TTCAGCCACAGGCTCCCAGACATGACAGCCATCATCAAAGAGATCGTTAGCAGAAACAAAAGGAGATATCAAGAGGATGGATTCGACTTAGACTTGACCTGTATCCATTTCTGCGGCTGC
10	89653763	89653883	PTEN	121	CTTAACTAAAGTACTCAGATATTTATCCAAACATTATTGCTATGGGATTTCCTGCAGAAAGACTTGAAGGCGTATACAGGAACAATATTGATGATGTAGTAAGGTAAGAATGCTTTGATT
10	89685231	89685351	PTEN	121	GTTAATGGTGGCTTTTTGTTTGTTTGTTTTGTTTTAAGGTTTTTGGATTCAAAGCATAAAAACCATTACAAGATATACAATCTGTAAGTATGTTTTCTTATTTGTATGCTTGCAAATATC
10	89690764	89690884	PTEN	121	AAAGATAACTTTATATCACTTTTAAACTTTTCTTTTAGTTGTGCTGAAAGACATTATGACACCGCCAAATTTAATTGCAGAGGTAGGTATGAATGTACTGTACTATGTTGTATAACTTAA
10	89692769	89692889	PTEN	121	TTGCACAATATCCTTTTGAAGACCATAACCCACCACAGCTAGAACTTATCAAACCCTTTTGTGAAGATCTTGACCAATGGCTAAGTGAAGATGACAATCATGTTGCAGCAATTCACTGTA
10	89692889	89693009	PTEN	121	AAGCTGGAAAGGGACGAACTGGTGTAATGATATGTGCATATTTATTACATCGGGGCAAATTTTTAAAGGCACAAGAGGCCCTAGATTTCTATGGGGAAGTAAGGACCAGAGACAAAAAGG
10	89711825	89711945	PTEN	121	ATGGAACATTTTTTTTCAATTTGGCTTCTCTTTTTTTTCTGTCCACCAGGGAGTAACTATTCCCAGTCAGAGGCGCTATGTGTATTATTATAGCTACCTGTTAAAGAATCATCTGGATTA
10	89711945	89712065	PTEN	121	TAGACCAGTGGCACTGTTGTTTCACAAGATGATGTTTGAAACTATTCCAATGTTCAGTGGCGGAACTTGCAGTAAGTGCTTGAAATTCTCATCCTTCCATGTATTGGAACAGTTTTCTTA
10	89717573	89717693	PTEN	121	CTGTGAAATAATACTGGTATGTATTTAACCATGCAGATCCTCAGTTTGTGGTCTGCCAGCTAAAGGTGAAGATATATTCCTCCAATTCAGGACCCACACGACGGGAAGACAAGTTCATGT
10	89717693	89717813	PTEN	121	ACTTTGAGTTCCCTCAGCCGTTACCTGTGTGTGGTGATATCAAAGTAGAGTTCTTCCACAAACAGAACAAGATGCTAAAAAAGGTTTGTACTTTACTTTCATTGGGAGAAATATCCAAAA
10	89720643	89720763	PTEN	121	tttttAGGACAAAATGTTTCACTTTTGGGTAAATACATTCTTCATACCAGGACCAGAGGAAACCTCAGAAAAAGTAGAAAATGGAAGTCTATGTGATCAAGAAATCGATAGCATTTGCAG
10	89720763	89720883	PTEN	121	TATAGAGCGTGCAGATAATGACAAGGAATATCTAGTACTTACTTTAACAAAAAATGATCTTGACAAAGCAAATAAAGACAAAGCCAACCGATACTTTTCTCCAAATTTTAAGGTCAGTTA
10	89725016	89725136	PTEN	121	TTTTCATTTTAAATTTTCTTTCTCTAGGTGAAGCTGTACTTCACAAAAACAGTAGAGGAGCCGTCAAATCCAGAGGCTAGCAGTTCAACTTCTGTAACACCAGATGTTAGTGACAATGAA
10	89725136	89725256	PTEN	121	CCTGATCATTATAGATATTCTGACACCACTGACTCTGATCCAGAGAATGAACCTTTTGATGAAGATCAGCATACACAAATTACAAAAGTCTGAATTTTTTTTTATCAAGAGGGATAAAAC
10	123258021	123258139	FGFR2	119	GGCTCCAAGAAGATTTATGATATTCTTGTGTTTCCCAATCATCTTCATCATCTCCATCTCTGACACCAGATCAGAAAGGTCTTTCTCTGTGGCATCATCTATGAACAGTAGGCATATT
10	123274734	123274851	FGFR2	118	CTGTTACCACCATACAGGCGATTAAGAAGACCCCTATGCAGTAAATGGCTATCTCCAGGTAGTCTGGGGAAGCTGTAATCTCCTTTTCTCTTCCAGGCGCTAGATTGCAGATCACAG
10	123279467	123279563	FGFR2	97	ACCTTTAGATTCAGAAAGTCCTCACCTTGAGAACCTTGAGGTAGGGCAGCCCGTCGGGCCCGTATTTACTGCCGTTCTTTTCCACGTGCTTGATCC
10	123279617	123279707	FGFR2	91	CTCCGACCACTGTGGAGGCATTTGCCGGCAGTCCGGCTTGGAGGATGGGCCGGTGAGGCGATCGCTCTGGTGGAGAGAGGGAAGAAAGGA
11	532551	532671	HRAS	121	CGCAGGCCAGGAGACCGGCAGGGGCGGGGAGCCGGGGTCATCCGGTGGGCGTGGCGGCCGCCCTGGGAGTCCCCCTCACCTGCGTCAGGAGAGCACACACTTGCAGCTCATGCAGCCGGG
11	532671	532791	HRAS	121	GCCACTCTCATCAGGAGGGTTCAGCTTCCGCAGCTTGTGCTGCCGGATCTCACGCACCAACGTGTAGAAGGCATCCTCCACTCCCTGGGAAAGGAGGGATGGGATCAGGAGGGACCGGCC
11	533257	533377	HRAS	121	GCCGTCCCGGGAGACTTACAGCGCGAGGGGCCGCTGGGTCACATGGGTCCCGGGGGGTCCCAGAGGGTCCCGGAGCTGGAGCTAGAGCCAGAGCGGCTGCCCTGTGTCAAGGGAGAGGGT
11	533412	533532	HRAS	121	GCGGGTCCCTGGCTAGCTGTGGGGTGGAGAGCTGCCTCACCTGCCGGGTCTTGGCCGAGGTCTCGATGTAGGGGATGCCGTAGCTTCGGGCGAGGTCCTGAGCCTGCCGAGATTCCACAG
11	533532	533652	HRAS	121	TGCGTGCAGCCAGGTCACACTTGTTCCCCACCAGCACCATGGGCACGTCATCCGAGTCCTTCACCCGTTTGATCTGCTCCCTGAGAGGTGGAAAGCGAGAGCTGGCTACGGGGGCTGCAG
11	533734	533854	HRAS	121	TGGGCTCCCGGGCCAGCCTCACGGGGTTCACCTGTACTGGTGGATGTCCTCAAAAGACTTGGTGTTGTTGATGGCAAACACACACAGGAAGCCCTCCCCGGTGCGCATGTACTGGTCCCG
11	533854	533974	HRAS	121	CATGGCGCTGTACTCCTCCTGGCCGGCGGTATCCAGGATGTCCAACAGGCACGTCTCCCCATCAATGACCACCTGCTTCCGGTAGGAATCCTGCAGGAGGACAGGGCTCAGGGACCCCCT
11	534206	534326	HRAS	121	CTCACCTCTATAGTGGGGTCGTATTCGTCCACAAAATGGTTCTGGATCAGCTGGATGGTCAGCGCACTCTTGCCCACACCGCCGGCGCCCACCACCACCAGCTTATATTCCGTCATCGCT
12	25362405	25362525	KRAS	121	CACACCAACATTCACAATTGGTAAGAAAAATAAGAAGTAATCAACTGCATGCACCAAAAGCCCCAAGACAGAAATCTTAGGTATTCAGTTTCTTTTTCACAGGCATTGCTAGTTCAAAAA
12	25362525	25362645	KRAS	121	CCAAAACTCTGGGAATACTGGCACTTAGAGGAAAAAAAAACTTCCACTGTCATTTTAAAATAAGCATTTAAGGTAAAAGCTAACAGTCTGCATGGAGCAGGAAAAAAATTAGGTAATGCT
12	25362645	25362765	KRAS	121	AAAACAAATGCTAATAATTTAGTGTAATGTACAAAAATTACCACTTGTACTAGTATGCCTTAAGAAAAAAGTACAAATTGTATTTACATAATTACACACTTTGTCTTTGACTTCTTTTTC
12	25362765	25362885	KRAS	121	TTCTTTTTACCATCTTTGCTCATCTTTTCTTTATGTTTTCGAATTTCTCGAACTAATGTATAGAAGGCATCATCAACACCCTGAAATACATAAAAAGTATTAAAATGTGAATATATACGA
12	25368048	25368168	KRAS	121	aGCTGCTGATTATCTCAAAACTTTTCCCTTAAAAATAAAGGTAAATATCAGTTTCCAAATATTTAGTTTACTTAAGACTCATTAAATCATTAGACTTTATGCCAAATATAGATTAGTCTA
12	25368168	25368288	KRAS	121	CTACAGCCATCAAAATTGTCTCAATTATAATTAATTCCCACTAGATTAAAAATAAATGTACTAATTATGGAAACAAGTTTCTTATCTTTTAATACTTCAAGTTAGAATACTACACCTAAG
12	25368288	25368408	KRAS	121	TAGTTCTAAAGTGGTTGCCACCTTGTTACCTTTAAAAGACATCTGCTTTCTGCCAAAATTAATGTGCTGAACTTAAACTTACCAGATTACATTATAATGCATTTTTTAATTTTCACACAG
12	25368408	25368528	KRAS	121	CCAGGAGTCTTTTCTTCTTTGCTGATTTTTTTCAATCTGTATTGTCGGATCTCCCTCACCAATGTATAAAAAGCATCCTCCACTCTCTGCATTGTAAAACACAACTTCTTTAAAGTCTGT
12	25378507	25378627	KRAS	121	TTGCAGAAAACAGATCTGTATTTATTTCAGTGTTACTTACCTGTCTTGTCTTTGCTGATGTTTCAATAAAAGGAATTCCATAACTTCTTGCTAAGTCCTGAGCCTGTTTTGTGTCTACTG
12	25378627	25378747	KRAS	121	TTCTAGAAGGCAAATCACATTTATTTCCTACTAGGACCATAGGTACATCTTCAGAGTCCTTAACTCTTTTAATTTGTTCTCTGGGAAAGAAAAAAAAGTTATAGCACAGTCATTAGTAAC
12	25380137	25380257	KRAS	121	GTCAGCTTATTATATTCAATTTAAACCCACCTATAATGGTGAATATCTTCAAATGATTTAGTATTATTTATGGCAAATACACAAAGAAAGCCCTCCCCAGTCCTCATGTACTGGTCCCTC
12	25380257	25380377	KRAS	121	ATTGCACTGTACTCCTCTTGACCTGCTGTGTCGAGAATATCCAAGAGACAGGTTTCTCCATCAATTACTACTTGCTTCCTGTAGGAATCCTGAGAAGGGAGAAACACAGTCTGGATTATT
12	25398148	25398268	KRAS	121	TTTATCTGTATCAAAGAATGGTCCTGCACCAGTAATATGCATATTAAAACAAGATTTACCTCTATTGTTGGATCATATTCGTCCACAAAATGATTCTGAATTAGCTGTATCGTCAAGGCA
12	25398268	25398388	KRAS	121	CTCTTGCCTACGCCACCAGCTCCAACTACCACAAGTTTATATTCAGTCATTTTCAGCAGGCCTTATAATAAAAATAATGAAAATGTGACTATATTAGAACATGTCACACATAAGGTTAAT
12	112888099	112888219	PTPN11	121	CCTTTCCAATGGACTATTTTAGAAGAAATGGAGCTGTCACCCACATCAAGATTCAGAACACTGGTGATTACTATGACCTGTATGGAGGGGAGAAATTTGCCACTTTGGCTGAGTTGGTCC
12	112888219	112888255	PTPN11	37	AGTATTACATGGAACATCACGGGCAATTAAAAGAGA
12	112926792	112926903	PTPN11	112	GTTTCTCTTTATTCTTCATGATGTTTCCTTCGTAGGTGTTGACTGCGATATTGACGTTCCCAAAACCATCCAGATGGTGCGGTCTCAGAGGTCAGGGATGGTCCAGACAGA
12	112926903	112926948	PTPN11	46	AGCACAGTACCGATTTATCTATATGGCGGTCCAGCATTATATTGA
13	28592577	28592664	FLT3	88	AAATAAGTAGGAAATAGCAGCCTCACATTGCCCCTGACAACATAGTTGGAATCACTCATGATATCTCGAGCCAATCCAAAGTCACAT
13	28592664	28592697	FLT3	34	ATCTTCACCACTTTCCCGTGGGTGACAAGCACG
13	28602309	28602389	FLT3	81	GTTACCTGACAGTGTGCACGCCCCCAGCAGGTTCACAATATTCTCGTGGCTTCCCAGCTGGGTCATCATCTTGAGTTCTG
13	28608207	28608285	FLT3	79	TCCATTCTTACCAAACTCTAAATTTTCTCTTGGAAACTCCCATTTGAGATCATATTCATATTCTCTGAAATCAACGTA
13	28608285	28608401	FLT3	117	GAAGTACTCATTATCTGAGGAGCCGGTCACCTGTACCATCTGTAGCTGGCTTTCATACCTAAATTGCTTCAGAGATGAAATGATGAGTCAGTTAGGAATAGGCAGTTCTGCAGATA
13	28610078	28610186	FLT3	109	ACTTGTCTGAACACTTCTTCCAGGTCCAAGATGGTAATGGGTATCCATCCGAGAAACAGGACGCCTGACTTGCCGATGCTTCTGCGAGCACTTGAGGTTTCCCTATAG
14	105236657	105236777	AKT1	121	CAGCGCAGTCCACCGCCGCCTCAGGCCGTGCCGCTGGCCGAGTAGGAGAACTGGGGGAAGTGGGGCCTGCGCTCGCTGTCCACACACTCCATGCTGTCATCTGTGGGTGTAGACAGCTCA
14	105237072	105237192	AKT1	121	GCCCCTCACCTTGGTCAGGTGGTGTGATGGTGATCATCTGGGCCGTGAACTCCTCATCAAAATACCTGGTGTCAGTCTCCGACGTGACCTGGGGCTTGAAGGGTGGGCTGAGCTGCAGAG
14	105238685	105238805	AKT1	121	CGGGGAGCAGCCGCACCTTCTTCTCGTACACGTGCTGCCACACGATACCGGCAAAGAAGCGATGCTGCATGATCTCCTTGGCGTCCTCGGAGCCCCCGCCAAGCCTGCAGGCAGGAAACA
14	105239201	105239321	AKT1	121	GGGCGGCCCTCACCTCTGCTTGGGGTCCTTCTTGAGCAGCCCTGAAAGCAAGGACTTGGCCTCGGGACCAAGCGTGCGCGGGAAGCGGATCTCCTCCATGAGGATGAGCTCAAAAAGCTT
14	105239321	105239441	AKT1	121	CTCATGGTCCTGGTTGTAGAAGGGCAGGCGACCGCACATCATCTCGTACATGACCACGCCCAGCCCCCACCAGTCCACTGCACGGCCGTAGTCATTGTCCTCCAGCACCTGCACGGGTGG
14	105239532	105239652	AKT1	121	TGTGCTCAGGACGTGGGGACGCAGCAACGCGTATGCACGCAGGTGGGGCGCACACCTCGGGGGCCAGGTACTCAGGTGTGCCGCAAAAGGTCTTCATGGTGGCACCGTCCTTGATCCCCT
14	105239652	105239772	AKT1	121	CCTTGCACAGCCCGAAGTCTGTGATCTTAATGTGCCCGTCCTTGTCCAGCATGAGGTTCTCCAGCTAGGGGAAAGGTGGCCTCAGGTCAGTGCCGCCAGGCCCCCAGGGCCCTGCCCCCC
14	105239734	105239854	AKT1	121	CAGGTCAGTGCCGCCAGGCCCCCAGGGCCCTGCCCCCCTGCCTGCCCGCCAGCGCACCTTGAGGTCCCGGTACACCACGTTCTTCTCCGAGTGCAGGTAGTCCAGGGCTGACACAATCTC
14	105239854	105239974	AKT1	121	AGCGCCATAGAAGCGGGCCCGGTCCTCGGAGAACACACGCTCCCGGGACAGGTGGAAGAACAGCTGCGGGAGGCGCAACCTGAGGCACAGCCGTGGCTCGGGCCTCTGCCCCCATGGCCT
14	105240223	105240343	AKT1	121	CATCCCCCGCAGCCCCAGCCCCTACCTCGCCCCCGTTGGCGTACTCCATGACAAAGCAGAGGCGGTCGTGGGTCTGGAAAGAGTACTTCAGGGCCTGCAAGGAAGGGGAGCTGGAACTGC
14	105241247	105241367	AKT1	121	TTCAGCCCCATCTGGGCTCCCACTCACTGTGAGGAAGGGGTGCCTGGAGTTCTGCAGGACGCGGTTCTCGGTGAGTGTGTGGGCCACCTCGTCCTGTAAAGCAGGGCTGGGTGAGCTGCC
14	105241392	105241511	AKT1	120	CCCCACCGCCCCGGCCCCACCTTGGCCACGATGACTTCCTTCTTGAGGATCTTCATGGCGTAGTAGCGGCCTGTGGCCTTCTCCTTCACCAGGATCACCTTGCCGAAAGTGCCCTTGCC
14	105241511	105241631	AKT1	121	CAGCAGCTTCAGGTACTCAAACTCGTTCATGGTCTATGGGCAGGCACCAGGGTCAGCAAGCGGCGCTGCCAACAGTGCCCAGCTGGTCGGCATGCGTGGGGTGGCATGAGGGGCCCCAGA
14	105241942	105242062	AKT1	121	GTCCAAGGCAGCCCCAGGCACAGGCAGAAGTGGGGACAGGCCTCACCACGCGGTGCTTGGGCTTGGCCAGGGACACCTCCATCTCTTCAGCCCCTGAGTTGTCACTGGGTGAGCCCGACC
14	105242062	105242182	AKT1	121	GGAAGTCCATCTCCTCCTCCTCCTGCTTCTTGAGGCCGTCAGCCACAGTCTGGATGGCGGTTGTCCACTCCTCCCTGCAGGAGGTCAGGTGAGGCTGCAGGCCTGTACCAGATCAGGAGC
14	105242991	105243111	AKT1	121	GTACCGCTCCTCAGGAGTCTCCACATGGAAGGTGCGTTCGATGACAGTGGTCCACTGCAGGCAGCGGATGATGAAGGTGTTGGGCCGGGGCCGCTCCGTCTTCATCAGCTGGCACTCTGC
14	105243871	105243991	AKT1	121	ACCTGGGGCACAAGCACACCTGGGGAACACATACCTGGGGCACAGCCACACCTACAGCACGTACACCCTGAGGGCTGTGGGAACGTGCGGGGCCCTGAGAGGTGTGAGTGAGTGGAGTGT
14	105243991	105244111	AKT1	121	GTAGCCGCTGGGGCTCCGTGGCAGGCTCTGGCCCAGCCTGTGCAAAGCAGGAGGAGGCTGAGGGGCCAGTGGGGGGCCTCTGACATTCCAGCATCGAGGCCCTGGCAACCACAAGGGGGC
14	105246369	105246489	AKT1	121	AGGGCTCCAGCCAACCCCCCAAATCTGAATCCCGAGAGGCCAAGGGGATACTTACGCGCCACAGAGAAGTTGTTGAGGGGAGCCTCACGTTGGTCCACATCCTGCGGCCGCTCCTTGTAG
14	105246489	105246609	AKT1	121	CCAATGAAGGTGCCATCATTCTTGAGGAGGAAGTAGCGTGGCCGCCAGGTCTTGATGTACTCCCCTACAGACGTGCGGGTGGTGAGAGCCACGCACACTCTACCCGTCAGACCCTCGCCA
14	105258897	105259017	AKT1	121	TCCCTCCCCAGGCCCAGCCCTGGCAGCGGGTACTAACCTCGTTTGTGCAGCCAACCCTCCTTCACAATAGCCACGTCGCTCATGGTGCCCGAGGCTCCCGCGACGCTCACGCGCTCCTCT
15	66679665	66679785	MAP2K1	121	GCGCGTTACCCGGGTCCAAAATGCCCAAGAAGAAGCCGACGCCCATCCAGCTGAACCCGGCCCCCGACGGCTCTGCAGTTAACGGGACCAGCTCTGCGGAGTAAGTATGGGGCGGGCGGT
15	66694276	66694396	MAP2K1	121	gctggagaggtaggctgaggTGGTTTTGTGGTTCCAGGCTGAACATTTTGAAAAATCACATGCAAATTTTTCTTCCTTTCTGATCATTTTAAAGTATTTCTGAGTAGTTTTTATATGCTT
15	66727350	66727470	MAP2K1	121	CCACTTTGGAACAGGACCAACTTGGAGGCCTTGCAGAAGAAGCTGGAGGAGCTAGAGCTTGATGAGCAGCAGCGAAAGCGCCTTGAGGCCTTTCTTACCCAGAAGCAGAAGGTGGGAGAA
15	66727470	66727590	MAP2K1	121	CTGAAGGATGACGACTTTGAGAAGATCAGTGAGCTGGGGGCTGGCAATGGCGGTGTGGTGTTCAAGGTCTCCCACAAGCCTTCTGGCCTGGTCATGGCCAGAAAGGTGAGTTTGCCTTGA
15	66729037	66729157	MAP2K1	121	TCCCTCTTTCTTTCATAAAACCTCTCTTTCTTCCACCTTTCTCCAGCTAATTCATCTGGAGATCAAACCCGCAATCCGGAACCAGATCATAAGGGAGCTGCAGGTTCTGCATGAGTGCAA
15	66729157	66729277	MAP2K1	121	CTCTCCGTACATCGTGGGCTTCTATGGTGCGTTCTACAGCGATGGCGAGATCAGTATCTGCATGGAGCACATGGTATGTGACACCCTCTCAGCCTCTGGAGCAATGGCCTTAAGAGTTGG
15	66735596	66735716	MAP2K1	121	GTCTGGTATTCTCGATCTTAGGATGGAGGTTCTCTGGATCAAGTCCTGAAGAAAGCTGGAAGAATTCCTGAACAAATTTTAGGAAAAGTTAGCATTGCTGTGAGTATGTTATGAAGTTTT
15	66736959	66737079	MAP2K1	121	TATTTTCTTTTCTTTTACATTCCCTTTCCTCTAGGTAATAAAAGGCCTGACATATCTGAGGGAGAAGCACAAGATCATGCACAGAGGTAAGAAGTTATTTGCTAGTTATTTTGCTTTGAA
15	66774034	66774154	MAP2K1	121	TCTCTTCCCCAATCTACCTGTGTCAGTTCCCTCCTTTTCTATTTTCTCTTCCCTGCAGATGTCAAGCCCTCCAACATCCTAGTCAACTCCCGTGGGGAGATCAAGCTCTGTGACTTTGGG
15	66774154	66774274	MAP2K1	121	GTCAGCGGGCAGCTCATCGACTCCATGGCCAACTCCTTCGTGGGCACAAGGTCCTACATGTCGGTATGAACAGAAGTTTCCATTGCTTGAGCTTCTTGTACGGTCAGGGAGAGGAGCCCA
15	66777308	66777428	MAP2K1	121	CTGTCTGTCTCTCCTGCAGCCAGAAAGACTCCAGGGGACTCATTACTCTGTGCAGTCAGACATCTGGAGCATGGGACTGTCTCTGGTAGAGATGGCGGTTGGGAGGTATCCCATCCCTCC
15	66777428	66777548	MAP2K1	121	TCCAGATGCCAAGGAGCTGGAGCTGATGTTTGGGTGCCAGGTGGAAGGAGATGCGGCTGAGACCCCACCCAGGCCAAGGACCCCCGGGAGGCCCCTTAGCTGTGAGTAGCCTGGTGTGTC
15	66779537	66779657	MAP2K1	121	GTATTTTTTCTTTTTATAAAATTTGTAGCATACGGAATGGACAGCCGACCTCCCATGGCAATTTTTGAGTTGTTGGATTACATAGTCAACGAGGTAAGTACTGCCTGGTTTCCTTCACCT
15	66781523	66781643	MAP2K1	121	ATTTTTCTTATCTCAACATGTGTTTGCAGCCTCCTCCAAAACTGCCCAGTGGAGTGTTCAGTCTGGAATTTCAAGATTTTGTGAATAAATGGTAAGTTGGCTCCTTGTTCTCTGGAAGCG
15	66782018	66782138	MAP2K1	121	CAGGCAACAGCTCTTACCTTGTCTTTCTTCCTTTAAGCTTAATAAAAAACCCCGCAGAGAGAGCAGATTTGAAGCAACTCATGGTGAGTCTATTTATTCCGGATTCTTACAGTACCTGTT
15	66782836	66782956	MAP2K1	121	CAGGTTCATGCTTTTATCAAGAGATCTGATGCTGAGGAAGTGGATTTTGCAGGTTGGCTCTGCTCCACCATCGGCCTTAACCAGCCCAGCACACCAACCCATGCTGCTGGCGTCTAAGTG
15	90631779	90631782	IDH2	4	GTG
15	90631779	90631899	IDH2	121	GTGCCCAGGTCAGTGGATCCCCTCTCCACCCTGGCCTACCTGGTCGCCATGGGCGTGCCTGCCAATGGTGATGGGCTTGGTCCAGCCAGGGACTAGGCGTGGGATGTTTTTGCAGATGAT
15	90631899	90631995	IDH2	97	GGGCTCCCGGAAGACAGTCCCCCCCAGGATGTTCCGGATAGTTCCATTGGGACTTTTCCACATCTTCTTCAGCTTGAACTCTGTGAGGACAGAGAT
17	7572907	7573027	TP53	121	GAACAAGAAGTGGAGAATGTCAGTCTGAGTCAGGCCCTTCTGTCTTGAACATGAGTTTTTTATGGCGGGAGGTAGACTGACCCTTTTTGGACTTCAGGTGGCTGTAGGAGACAGAAGCAG
17	7573919	7574039	TP53	121	CACTCACCTGGAGTGAGCCCTGCTCCCCCCTGGCTCCTTCCCAGCCTGGGCATCCTTGAGTTCCAAGGCCTCATTCAGCTCTCGGAACATCTCGAAGCGCTCACGCCCACGGATCTGCAG
17	7576566	7576685	TP53	120	tcgtaagtcaagtagcatctgTATCAGGCAAAGTCATAGAACCATTTTCATGCTCTCTTTAACAATTTTCTTTTTGAAAGCTGGTCTGGTCCTTTAAAATATATATTATGGTATAAGTT
17	7576829	7576949	TP53	121	TAAGAGGTCCCAAGACTTAGTACCTGAAGGGTGAAATATTCTCCATCCAGTGGTTTCTTCTTTGGCTGGGGAGAGGAGCTGGTGTTGTTGGGCAGTGCTAGGAAAGAGGCAAGGAAAGGT
17	7576967	7577087	TP53	121	GCATAACTGCACCCTTGGTCTCCTCCACCGCTTCTTGTCCTGCTTGCTTACCTCGCTTAGTGCTCCCTGGGGGCAGCTCGTGGTGAGGCTCCCCTTTCTTGCGGAGATTCTCTTCCTCTG
17	7577087	7577207	TP53	121	TGCGCCGGTCTCTCCCAGGACAGGCACAAACACGCACCTCAAAGCTGTTCCGTCCCAGTAGATTACCACTACTCAGGATAGGAAAAGAGAAGCAAGAGGCAGTAAGGAAATCAGGTCCTA
17	7577493	7577613	TP53	121	CTGACCTGGAGTCTTCCAGTGTGATGATGGTGAGGATGGGCCTCCGGTTCATGCCGCCCATGCAGGAACTGTTACACATGTAGTTGTAGTGGATGGTGGTACAGTCAGAGCCAACCTAGG
17	7578173	7578293	TP53	121	GACCTCAGGCGGCTCATAGGGCACCACCACACTATGTCGAAAAGTGTTTCTGTCATCCAAATACTCCACACGCAAATTTCCTTCCACTCGGATAAGATGCTGAGGAGGGGCCAGACCTAA
17	7578367	7578487	TP53	121	CACCATCGCTATCTGAGCAGCGCTCATGGTGGGGGCAGCGCCTCACAACCTCCGTCATGTGCTGTGACTGCTTGTAGATGGCCATGGCGCGGACGCGGGTGCCGGGCGGGGGTGTGGAAT
17	7578487	7578607	TP53	121	CAACCCACAGCTGCACAGGGCAGGTCTTGGCCAGTTGGCAAAACATCTTGTTGAGGGCAGGGGAGTACTGTAGGAAGAGGAAGGAGACAGAGTTGAAAGTCAGGGCACAAGTGAACAGAT
17	7578607	7578727	TP53	121	AAAGCAACTGGAAGACGGCAGCAAAGAAACAAACATGCGTAAGCACCTCCTGCAACCCACTAGCGAGCTAGAGAGAGTTGGCGTCTACACCTCAGGAGCttttctttttttttttttttt
17	7579270	7579390	TP53	121	CATTGAAGTCTCATGGAAGCCAGCCCCTCAGGGCAACTGACCGTGCAAGTCACAGACTTGGCTGTCCCAGAATGCAAGAAGCCCAGACGGAAACCGTAGCTGCCCTGGTAGGTTTTCTGG
17	7579390	7579510	TP53	121	GAAGGGACAGAAGATGACAGGGGCCAGGAGGGGGCTGGTGCAGGGGCCGCCGGTGTAGGAGCTGCTGGTGCAGGGGCCACGGGGGGAGCAGCCTCTGGCATTCTGGGAGCTTCATCTGGA
17	7579510	7579630	TP53	121	CCTGGGTCTTCAGTGAACCATTGTTCAATATCGTCCGGGGACAGCATCAAATCATCCATTGCTTGGGACGGCAAGGGGGACTGTAGATGGGTGAAAAGAGCAGTCAGAGGACCAGGTCCT
17	7579686	7579806	TP53	121	CCCTTGTCCTTACCAGAACGTTGTTTTCAGGAAGTCTGAAAGACAAGAGCAGAAAGTCAGTCCCATGGAATTTTCGCTTCCCACAGGTCTCTGCTAGGGGGCTGGGGTTGGGGTGGGGGT
17	7579806	7579926	TP53	121	GGTGGGCCTGCCCTTCCAATGGATCCACTCACAGTTTCCATAGGTCTGAAAATGTTTCCTGACTCAGAGGGGGCTCGACGCTAGGATCTGACTGCGGCTCCTCCATGGCAGTGACCCGGA
17	10424553	10424673	MYH2	121	ATTTTGTGCCTGTCTTCAGTCATTCCATGGCATCAGGACATGATCACTCTTCACTTATGACTTTTGTGTGAACCTCCCGGCTCTTCACCCGCAGTTTGTTCACCTGGGACTCAGCAATGT
17	10424673	10424793	MYH2	121	CAGCCCGTTCCTCGGCCTCCTCCAGCTCATGCTGGAGCTTGCGGAATTTAGCTAGATTGGTGTTGGATTGTTCCTCCTGAGAATAAAAATGGAATTGTAAGGAACTCATACTTGCATCTT
17	10426394	10426514	MYH2	121	AAAAATACTTACAGCCTCCTCAGCTTGTCTCTTATAAGATTTCACTTTTGCCTGAAGTTTATCTACCAAATCTTGAAGCCTGAGAATATTCTTTCTATCTTCTTCCGTCTGAAAGATTAT
17	10426617	10426737	MYH2	121	GCTGTACCTGGTAAGTGAGTTCCTTCACTCGCCTCTCATGTTTGCGCAGACCTTTGACAGCCTCAGCATTACGCTTTTGCTCACTCTCAACCTCTCCTTCCAGCTCCCGTACCTGCAAAT
17	10426777	10426897	MYH2	121	AGCAGATGGAAATAGACAGATATTGGGAGACCCACCCTGGCCTCCAGTTTCTGGATCTGCTTCTTCCCACCCTTCAGGGCCAGCTGCTCAGCCTCATCCAGACGGAGCTGCAGATCCTTC
17	10426897	10427017	MYH2	121	ACGGTCTGCTCCATGTTCTTCTTCATCCGCTCCAGGTGGGCGCTGGTGTCCTGCTCCTTCTTCAGCTCCTCAGCCATCATGGCGGCCTAAATAGCAAATAAATCAAGAAAACCAAGAAAG
17	10427018	10427138	MYH2	121	TATAGATGTCAGGAAATCTTACTGCTAAATCAGTGGACAAGTGTGCCTGCCACTCACATCAGTGATGGCCTTCTTGGCCTTTTCTTCTGCATTGCGGGCTTCCTGGAGAATGTCCTCCAT
17	10427138	10427258	MYH2	121	CTCTCCTTGCATTTGGGAAATATCTGTCTCCAGCTTCTTCTTGGTGTTGATCAGGCTGGTGTTCTGTTTAAAAAGAATTTGTACATTTAAAAAATTGTGTTACCAAAGTATTTATTGGTA
17	10427764	10427884	MYH2	121	CTTTGTGCTGAATCCCACCTGGGTGTGCAGTAGCTGAACACGCTCACTGGCATCCAGGAGCTCCTGTTCTGCGATTTTTCTGCTCCTCTCTGTCTGTTCCAGAGTGGCCCGCAGCTCCTC
17	10427884	10428004	MYH2	121	GATCTCAGCCTGCAGCAGGTTGGCTCTGCGCTCCACCATGGCCAGCTGTTCCTTCAGGTCCTCCTGGCTCCGGAGAGCATCATCCAGGTGGATCTGGGTATCCTGTGAAACAAACCATCA
17	10428048	10428168	MYH2	121	GGGACCATCTCTTGGACATATTTACCTTGAGGATGCCTTGGGTGTTCCTGTAGTTCCTCAGGGCCTCAGCAGCCATGCGGTTGGCATGGTTCAGCTGGATTTCCATTTCATTGAGGTCTC
17	10428168	10428288	MYH2	121	CCTCCATCTTCTTCTTGAGCCTAATGGCATCATTCCTACTCCTGATCTCAGCATCCAGCGTGCTCTGCATGGACTCCACGATTCTAATGTGGTTTCTCTTCAGCTGGTCAATTTCCTCAT
17	10428288	10428408	MYH2	121	CTTTTTCAGCAATTTTCCTATCAACCTCAGACTTGACTTGGTTCAACTCAAGCTGGATGCGCAGGATCTTTCCCTCTTCATGTTCAAGAGATGCCTTAATGACAGCAAGAGGTGACATTA
17	10428483	10428603	MYH2	121	TGCAGATGTACCTAATTATTTTCCAGATTTTTTTATAATGCACAATTTTACATGTACCTCTGCTTCTTCTAAAGCAGCCTGAAGTTCACACTTTTCTTGTTCCACTTGTTTCTTTATTTT
17	10428603	10428723	MYH2	121	CTCCAGTTCATGGATACGTTTCCCTCCTTCTGCAATCTGTTCCGTGAGGTCAGAAATCTCCTCTGTTGTTTGAGTAAAAGACAGGTAGGGATTTGGTTAAACATGTGACATAAGGGAGAG
17	10428730	10428850	MYH2	121	CAAGTTATGAATATTATTGAATATGATAGGGACTTACGCTGTAAGTTTTTGTTCTCTCGCTTCAGGGTTTCTAGCTGATCCAAAGATTCCTCATAGGCATTCTTTATCTTGAACAGCTCA
17	10428850	10428970	MYH2	121	GTGCCAAGGGAACGGGCCTCCTTCTGGGAGGCCTCAAGCTCAGCATGCGTTTCCTCACATTTCTGTTTCCATTCTGCCAGGATCTGAAAAACCAAGACCTGTTACCTGCTGCAAAGACAA
17	10428981	10429101	MYH2	121	AAAGAGCAGAAGATGCTGGAGGAATTACCTTATCGAAGTTCCTTTGCTTTTTGTCAAGGGCGGCACAGGCGGCATTTGTCCTCTCCACATCAAGCATGAGGTCCTCGACCTCATTCTGCA
17	10429101	10429221	MYH2	121	GCCGCTGCTTCGTCTTTTCGAGGGAAGCACATTTGGCGTTCACAGCTTCTACATGTTCCTCAGCTGCCTGCAGCCGCTGGGCCAGCTTCTTCCTTGAATATTATACATGTTTTCAGAGAG
17	10429894	10430014	MYH2	121	CTCTCATATCTGTGCACATACTTGGCCTCCTCCAGCTCCTCTGTGCGCTGGATGGCGTCCGTCTCGTATTTGGTCCTCCATTGGGCAACCTCGGTGTTGGCCTTGGACAGTGCTCTCTGC
17	10430014	10430134	MYH2	121	AGCTCGGCCTTGGATTCCTGCTCCTCCTCATACTGTTCCCGCAGCAGGTCACAGTCGTGGCGGGAAGACTGCAGGGCATGCGCCAGGGCGTTCTTGGCCTATGGAGGCAGTTACACCTTC
17	10430253	10430373	MYH2	121	CTTTTATCTCCTCTTCAAGTTGCCTCTTTAATTCTTCAATCTGTTGAGTAAAGGCTTGTTTGCCTCTTGATAACTGAGACACCAGAGCTTCCTTTTCATCAAGCTGGCGTGAAAACTCAC
17	10431007	10431127	MYH2	121	GTTGTTCTTAATCACATCCTCTCCACCCTGAAGCTGCACAGAAGAGGGGAGAGTTACCAGATTCAGTCTGCAGGCGCCCCCTCTGCGCAGTCAGGTCATTGATCAGCCGCTGCTGCTCCT
17	10431127	10431247	MYH2	121	CTTCCTTTGATTTCAGTTCACTCAGTTGGTCCTCTAGAGTCCGGCACATTTTCTCTAGGTTTCCCTATAGAAGAAAAAGTAAAAGAAGAAAACAGAGACCTTTTAAGCGAATAATAATCA
17	10431950	10432070	MYH2	121	tatgatgtgtccataATGCATTATTTTCAATAACAATTTCCCAGAATTTGTAGTACCTTGGCTTTGGAGACCGTTTCTACATTACTAGCAAGGTCATCAATCTCCATCTTCATCTCACTC
17	10432074	10432193	MYH2	120	CCTTCTCCAGCTTCTGCTTCACTCGCTGCAGGTTGTCAATCTGCTCCCCAAGCTCGGCCACACTATCTGCATGCTTCTTCCTCAGGGTGGCCGCTGTGGCTTCATGCTGTAGGGTGGCC
17	10432193	10432313	MYH2	121	TCCTCCAGGTCCCTGCGCATTTTCTGGAACTCAGCCTCCCGCTTCTTGTTCATCTCAATCTGGGCTGAAGTGGCCCCACCGGCTTCTTCCAGCCTCTCGCTGATCTCCTCCAGCTCCCGG
17	10432313	10432433	MYH2	121	GAGAGGTCAGAGCGCTGCTTCTCTGCTTTGGCCCGGGAGGCCCGCTCTGCCTCGATTTCCTCCTCCAGCTCCTCAATGCGGGCCTGGGAATGGTGGAAAATACAAACTCAGCTTCTTTGT
17	10432463	10432583	MYH2	121	AAATCATGTACTTACTTGCAATTCTTTAATTTTCTTCTGCAATTGAATGCCAAGTGCCTGTTCATCTTCAATCTTGCTTTGCAGATTGCTGATTTCAAACTCTTTCCTTTTAGAAAAGTA
17	10432605	10432725	MYH2	121	GTATCTAATGTTGGAAGCAAATCCATAAGCAATTCTTTCTTACTTACTTTTTGAGCTTTTCATCAAGTTGCTGTTTCTCATTTTCAATGTCCATTATGGATTCTTGGGCCAACTTCAAGT
17	10432725	10432845	MYH2	121	CACCCTCAAGTTTCCTCTTAGCCCTTTCTAGGTCCATGCGAAGTTTCTTTTCTTGCTCCAAGGACCCTTCAAGCTAAATATAAATTATGTTGAATCAGAAGGAATGCTTATCTTCCTTTA
17	10432849	10432969	MYH2	121	AAAAGAATGTCCTTGATGATACCAGACTTACATCATCCACTTGTTGTTCAAGTTTGATTTTAGCTTTGGTCAGGGTGTTGACTTTGTCCTCCTCTGCCTGCAGGTCATCCAGGGTCTGCT
17	10432969	10433089	MYH2	121	GGTGGGCCTCCTGGAGAGCCTTCTTCTCCTTGGTCAGCTTAGCAATGGTTTCATCCAGACCTGCCATCTCTTCTGTGAGGTTTTTCACCTACAAAGGTGAAGAAAGCAGTTTAGTTGCTA
17	10433089	10433209	MYH2	121	TAAAGCACCTTTGTTGGGTGGCAGAACCTCTATACAGTACTGTAGAATATGATTGATACCTTGTTTTCTGTGGCATGTTTCTCCTTCTCAACCTTGGCCAGTGTCAGCTCAAGGTCATCA
17	10433209	10433329	MYH2	121	ATGTCTTTCTTGAGTTCTGAACATTCATCCTCCAGTTTCCTCTTCTTGGCTGTCAGCTCAGCATTGATCTCTTCCTCATCCTCAGCTCTCTCAGTCACCTCTTTGATTTTGGCTTCTAGC
17	10433329	10433449	MYH2	121	TGGATTTTGGTTTTGATTAGCTGGTCACACCTTTCCTCTGCATCAGCCAAGCCTTCGGCTTCCTTAAGTTGGAAACAAGATCAAAATTGGGAAGAAAGAATGAAATACTTCACAATGGAT
17	10434897	10435017	MYH2	121	TTCTAGCACCTGCATCCTGGTTAGTGATACCAAGGGTGATATTCCAACTCACAGCCTGAACTTGGAGCTGCAAGTCATTTTTTTCTTTCAACAGCGTCACCATCTTTTCTTCCAGTTCCT
17	10435017	10435137	MYH2	121	TCCTTTTTGCCTCTGACTTGGCAAGTTCGTCTTTAATTTTCTGAAATTCTTCCTTCATGGTGGCCATCTCCTTCTCAGTTTCTGCACTCTTCAACAGAGGCTTGATCTTGAAGAAGAGTT
17	10435137	10435257	MYH2	121	TCATCCAGGGCCAGTGCTTGACATTCATGAAGGATCTGATATTGTACTGGATACAGAAGATGGCCTCCCTGAAATTTAATTGATGCAAATTAGTATTGTGTGGTTGATGCAATGGGATGA
17	10436550	10436670	MYH2	121	TTCAAATATGTTTTTGAAGATGGAATATGTGAATAAACATATTTTTTATACCTTCTCTCCACCATCCTCTGGTACTCCACTCTTGCCAAGAACCCTCTGCACCTGGCCTGGGTTCGGGTA
17	10436670	10436790	MYH2	121	ATCAGCTGGGCCAGCTTGTCATCTCGCATCTCCTCTAGGAGCCCCAGAAGACCAGCTTTGAAAAAGACCTGTGAATGGAAAGAGTTGCAAATCACAAGCTTTAATAAAGTTCAAAGGGAC
17	10436767	10436887	MYH2	121	GCTTTAATAAAGTTCAAAGGGACAGGAATAGCATCAGGTAGGATTTACAGAAAATTACCTTGGTGTGCCCAAATTTATACTGGGTGTGGTCAATGTCGATGGATGCAAGGAGCTTCTCAG
17	10436887	10437007	MYH2	121	AGGCCTTCTTGCTATCAATGAATTGCCCTTCAGGGATTGCACTTGCATTTAATACCTTGTATCTGTTGAAGTACATATAGCTTTTAACAACTAGTTTACTGATGACACAAATGCTAGCTA
17	10438388	10438508	MYH2	121	CCTCTGTTTGAAGTCTGCATAAAGGATTCTGCTTGGAAATCCTTTCCTACAGATGCGGATGCCTTCCAGCACACCGTTACACCTCAGCTGGTGGAGGACAAGCTCATGCTCCATGGCACC
17	10438578	10438698	MYH2	121	TTATGGAATTTCTTACCAGGAGTTTTTGTCTCATTGGGGATGATACACCTCACAAAGTGAGGATGGGTACTCCTGAGGTTGGTCATCAGCTTGTTCAAATTCTCCTGTAAAACCAGGAAA
17	10439825	10439945	MYH2	121	CAAAAACAATTTCTTCCTTACTCTGAAAAGGGCAGACACTGTCTGGAAAGAAGAGCCCTTCTTCTTACCACCTTTCTTGGCCCCTCCACCAGCTCCCTCTGAAGAAAAAGGAAGAAAAGA
17	10440524	10440644	MYH2	121	AGTATTATTAACATTTGAGCATTACCTCCTTCAGCAGTTTGAGCCCCAGAGAAGAGCTGAGCTAGAGTTTTCATTGCAGACTTCTGGTACAGTCCAACCACGGTCTCATTCAGGGGGTCC
17	10440644	10440764	MYH2	121	TTGTTCTTCTCCAGCCAGCCAGTAATGTTGTAGTCCACAACACCAGCATAGTGAATCAGAGCGAAGTGGGCCTCGGCCTTGCCTTTGACCACCTTGGGCTTCTGGAAGTTGGCAGACTTG
17	10440764	10440884	MYH2	121	CCCAGGTGCTGGTCATACAGCTTGTTCTTGAAGGAGGTGTCTGTTGCCTTAGGGAACATGCACTCCTCTTCCAGGATGGAGAAGATGCCCATAGGCTAAAAAGCAGACCACAACACAAAA
17	10440946	10441066	MYH2	121	GCCGCAAAATATGGTTTCAGAAATGCAAAACCAACCTTCTCGATGAGCTCGATGCAGGCAGCCAGGTCCATCCCGAAGTCGATGAACGTCCACTCGATGCCTTCCTTCTTGTACTCCTCC
17	10441066	10441186	MYH2	121	TGCTCCAGCACGAACATGTGGTGGTTGAAAAACTGTTGCAGTTTCTCATTGGTGAAGTTGATGCACAGCTGCTCCAGGCTGTTGAACTAAATAAATAGATATGTTTACTTCTCTCTTAAG
17	10442476	10442596	MYH2	121	ATTGCCTTACTGTAAAATCCTCTCACCAATCAGCTACAAACTCACATCAAAAATCTCAAAACCAGCAATGTCCAAGACCCCGATGAAGTACTGCCTGGGCTGCTTGGTGTCCAGCTGCTG
17	10442596	10442716	MYH2	121	GTTGATGCGGGCAACCATCCACAGGAACATCTTCTCGTAGACGGCTTTGGCCAGAGCACCTACTGCGTTGGACACCTTAAAAGACAAAATTATAACTCTCGAAGTTATTAAAGGCCTATG
17	10442759	10442879	MYH2	121	CCTGTTCTACAGTCTGGCCTTTGGTGACATACTCATTGCCGACCTTGACCCTGGGGTAGCAGAGAGCTTTGAGCAGATCTGCAGAGTTCAGACTCTGGAGGTAGGCCGCCTTGTCAGCAA
17	10443193	10443313	MYH2	121	GAATGTGATTTTCAAACAAATGCAAAATCATGGGAGTGACTTAGTTGATACCTTCTGTGCCATCTGGCTCTGCTTGCTCCTCACGCTGCTTTTGCTTAAATTTTAGGTTCCCATAATGCA
17	10443313	10443433	MYH2	121	TCACAGCCCCCGTGAGCTTGTAAATGGAGACCTTTTCTTCATTAGTAAAGCCCAAAATATCAATAGCACTCTGTCAATATAACCAATAGGATAGCTGTTAGGTTGTGATCCACACGCTTA
17	10443902	10444022	MYH2	121	CTACTTACATCTGTGGCCATCAGTTCTTCCTGATCATCGATGCTGGCCACACTGATCTCCCCTTGACTGACAAATGGGTAATCATATGGGTTCGTGGTAATCAGAAGCATTTCTAAGTAC
17	10446180	10446300	MYH2	121	ACATTTCTTACCAATAAGTTCTGGTTTCTTATTCGATGTAATCTGGTAAAAAATATGATAACTTCTCTCAGCCTTAAGCTGGAAAACAACTCTAGACTTCTCTAGCAGATCTGGAAGGAA
17	10446386	10446506	MYH2	121	ATGATTTTAAAGATATCTGAACACTTACATGTTTCAATATCAGCAGATGCCAGTTTTCCAGTAGTGCCAAAGTGGATTCTGATGAATTTACCCTTGAAATAAAAGCTAATATTACTACCt
17	10447014	10447134	MYH2	121	CCAAGAGACTTACAAAGCGAGAGGAGTTGTCATTCCTCACGGTCTTGGCGTTGCCAAAGGCCTCCAGTAGGGGGTTGGCACTGATGATTTGATCTTCCAGAGTCCCCTGCAAAGGCAAGA
17	10447215	10447335	MYH2	121	CACCTGTATTTTGCCAGAAGTAATTTCTTCCTTCTTCTTCTCACCAGTAACTGCAATTGTTGCAAAGTACTGGATGACACGCTTGGTGTTCACAGTCTTCCCTGCACCAGATTCTCCACT
17	10447370	10447490	MYH2	121	CTAGCAGCTATCACAGCCATGTAAAGAAAGCATAAAATCTACTTACGTGATCAGGATTGACTGATTCTCTCGGTCTACAAAAGAAATTATAGACATTTAATACTGTTTTCTTACATATTT
17	10448620	10448740	MYH2	121	CTCTAAAGGTTTACGCACTTGCAAAGCATTCGGCTCACTCACCAGTCAGCATGAACTGATAGGCGTTGTCAGAGATGGAGAAGATGTGGGGCGGGGCCTCCTGGCGCTTTTTGCCTCGGT
17	10448740	10448860	MYH2	121	AGGCTGTCACCACCTCGGGCTTATACACAGGCAGCCACTTGTAGGGGTTGACAGTGACACAGAAGAGACCTGAATAGGTCTATGAGAAGGAAAAAGAATAAGTACCCAAAGACCTTTCCT
17	10450743	10450863	MYH2	121	TAGGGTACATGAGGATGATTATACAGAGCACTGGCAGGGGACACTCACGTAGATCATCCAGGCTGCATAACGTTCTTTGAGGTTGTACAGCACAGCAGGCTCATGCAGATGAGTCATCAT
17	10450863	10450983	MYH2	121	GGCCATATCCTCGATCTTGTCATATTTGGGAGGGTTCATGGGGAAGACCTGATCATCCTTCACTGTCAGAGTCTGGTAAACAGGAAAGATAACCGTTTACATTAATTGAGTGACCAAACA
17	10451015	10451135	MYH2	121	TCCTGGGATTCTACTCACCGCTCCTCCCTCAGTCTTCACCGTCACTTTTCCTCCTTCTCTGCTCTGGATGGTCCCTTTGACAAAGGATTCTTTGGGCTCCGCCACAAAGACAGATGTTTT
17	10451135	10451255	MYH2	121	GGCATCAAAGGGCCTATTCTGGGCCTCAATGCGCTCCCTTTCAGACTTTCGGAGGAAAGGAGCAGCCTCCCCAAAAACAGCCAATTCTGAGTCTGAACTCATGGCTGCTGAACTCAGAGG
17	29422297	29422417	NF1	121	cctccgccgccccccggccGCGGGGAGGACATGGCCGCGCACAGGCCGGTGGAATGGGTCCAGGCCGTGGTCAGCCGCTTCGACGAGCAGGTAACCGGCCCGTGGCGGGCGGGAGGTGGG
17	29482952	29483072	NF1	121	TTTTTAAGGATAAGCTGTTAACGTGTTTTTTTTTTCTTTTTTTTTCAGCTTCCAATAAAAACAGGACAGCAGAACACACATACCAAAGTCAGTACTGAGCACAACAAGGAATGTCTAATC
17	29483072	29483192	NF1	121	AATATTTCCAAATACAAGTTTTCTTTGGTTATAAGCGGCCTCACTACTATTTTAAAGAATGTTAACAATATGGTGAGTATTTGGGTTACTGTGTTTTGGGGAATTTGCTTTCTTTTCTTT
17	29486009	29486129	NF1	121	GAATATCTTTTCTGTTAGAGAATATTTGGAGAAGCTGCTGAAAAAAATTTATATCTCTCTCAGTTGATTATATTGGATACACTGGAAAAATGTCTTGCTGGGGTAAGTAAATTGATCTTA
17	29490179	29490299	NF1	121	ATAATGTGATTATTTCTATTTTAGCAACCAAAGGACACAATGAGATTAGATGAAACGATGCTGGTCAAACAGTTGCTGCCAGAAATCTGCCATTTTCTTCACACCTGTCGTGAAGGAAAC
17	29490299	29490419	NF1	121	CAGCATGCAGCTGAACTTCGGAATTCTGCCTCTGGGGTTTTATTTTCTCTCAGCTGCAACAACTTCAATGCAGTCTTTAGTCGCATTTCTACCAGGTTAGTGTGTAAATCCACATGGGAC
17	29496902	29497022	NF1	121	TTTTAGGTTACAGGAATTAACTGTTTGTTCAGAAGACAATGTTGATGTTCATGATATAGAATTGTTACAGTATATCAATGTGGATTGTGCAAAATTAAAACGACTCCTGAAGGGTAAGTT
17	29508413	29508533	NF1	121	ATTTTTAAAAATTGTGTTTTTTCCAGAAACAGCATTTAAATTTAAAGCCCTAAAGAAGGTTGCGCAGTTAGCAGTTATAAATAGCCTGGAAAAGGTAAGTTACAACCTCTCTGGTATTAA
17	29508705	29508825	NF1	121	ACATGTGGTTCTTTATTTATAGGCATTTTGGAACTGGGTAGAAAATTATCCAGATGAATTTACAAAACTGTACCAGATCCCACAGACTGATATGGCTGGTAAGGATACGATTGATTTTTT
17	29509484	29509604	NF1	121	GTTCCTATCTAATAATGTCATTTAATATATTTTTCATGCAGAATGTGCAGAAAAGCTATTTGACTTGGTGGATGGTTTTGCTGAAAGCACCAAACGTAAAGCAGCAGTTTGGCCACTACA
17	29509604	29509724	NF1	121	AATCATTCTCCTTATCTTGTGTCCAGAAATAATCCAGGATATATCCAAAGACGTGGTTGATGAAAACAACATGAATAAGGTAAGGAGGGCAAAATTATTTCCATTATATCTAGATGTGAA
17	29527406	29527526	NF1	121	ATATTATCTTATCGCTATATTTGAATTCTGTAGAAGTTATTTCTGGACAGTCTACGAAAAGCTCTTGCTGGCCATGGAGGAAGTAGGCAGCTGACAGAAAGTGCTGCAATTGCCTGTGTC
17	29527526	29527646	NF1	121	AAACTGTGTAAAGCAAGTACTTACATCAATTGGGAAGATAACTCTGTCATTTTCCTACTTGTTCAGTCCATGGTGGTTGATCTTAAGGTAACATGCTTATTCTTTCTCTACTACAAACTT
17	29527996	29528116	NF1	121	GTAAAGAAATACTGCATGGGTATTTAAAGGCTTTTGTTTTCTGTTGGGGTTTTTATAGAACCTGCTTTTTAATCCAAGTAAGCCATTCTCAAGAGGCAGTCAGCCTGCAGATGTGGATCT
17	29528116	29528236	NF1	121	AATGATTGACTGCCTTGTTTCTTGCTTTCGTATAAGCCCTCACAACAACCAACACTTTAAGGTGAGAGCATTGGTTTTTATCTAACTATATTTACTGATGCTGTTATCCTTTATAAACAA
17	29528406	29528526	NF1	121	TTTTTTTTTTCTTTTTCTATAGATCTGCCTGGCTCAGAATTCACCTTCTACATTTCACTATGTGCTGGTAAATTCACTCCATCGAATCATCACCAATGTAAGTCCAAAAGGTATTGCTAA
17	29533203	29533323	NF1	121	ACAACTCACGTAATTTTGTACTTTTTCTTCCTATTGGTCTTTGTTTTTCTCTAGTCCGCATTGGATTGGTGGCCTAAGATTGATGCTGTGTATTGTCACTCGGTTGAACTTCGAAATATG
17	29533323	29533443	NF1	121	TTTGGTGAAACACTTCATAAAGCAGTGCAAGGTTGTGGAGCACACCCAGCAATACGAATGGCACCGGTAAGATAAATCACGAATTTTGAATCTCACCTCCTTTCTATTGCATTTTTTTTA
17	29541416	29541536	NF1	121	AGCTATTATCCTGAGTCTTATGTCTGATACCATGTTTTTGTTTTGTTTTTAGAGTCTTACATTTAAAGAAAAAGTAACAAGCCTTAAATTTAAAGAAAAACCTACAGACCTGGAGACAAG
17	29541536	29541656	NF1	121	AAGCTATAAGTATCTTCTCTTGTCCATGGTGAAACTAATTCATGCAGATCCAAAGCTCTTGCTTTGTGTAAGTATTTTTTTATGAAATGTCTCAAAATTATCACACTAAGTTAATTGGGT
17	29546019	29546139	NF1	121	CAGAATCCAAGAAAACAGGGGCCCGAAACCCAAGGCAGTACAGCAGAATTAATTACAGGGCTCGTCCAACTGGTCCCTCAGTCACACATGCCAGAGATTGCTCAGGAAGCAATGGAGGTA
17	29548860	29548979	NF1	120	AATTCAGGCTCTGCTGGTTCTTCATCAGTTAGATAGCATTGATTTGTGGAATCCTGATGCTCCTGTAGAAACATTTTGGGAGATTAGGTATATGTACttttattttttaaattcaactt
17	29548996	29549116	NF1	121	tttttGTCTTGAAATATTAACTCTGTAGTACTTAGTACATTGTAAAACTTACACTTCCAAAGGTTTTATGGTTTTGTATTTTATTTGACTTCAAATTATTAGAATTTCTTGTTTTAACTG
17	29549116	29549236	NF1	121	TAAGAAAAGTATCACAGCAATTTAGAAAATAAATTTTAAGAATAGTGCTAAATTTTGTCACCCTAACATAAGTACTGTTGTTTGGTATATTACTTTTTTCAGATTTCAATGTGGTTACTA
17	29549236	29549356	NF1	121	CTGTATTTTTAATAGATTTTCATAGTTATAAGCCTAGAATGATAAAATTTTGTAACAATACTGTTTTTTCAGTTTTTTGAACTATGATCTTTCATAAACTTTCTGTAATACCAATGCTTT
17	29549356	29549476	NF1	121	CGATGAATGAATTAATAATGGACACCTGCTTAGAAGAAAAAAATGTATGCAGAATTTTGTGGTCTGCTTCCTAGATTATACAAATCATTACATTTTAATGAGCATGAAGTCACCACACGG
17	29549476	29549595	NF1	120	AGGAAAATGTAAATGTGTAAACCTCAAGTTTGCCATTATCTTATAAGAATGGGTGTGCTAAGTTACTTGGCAGCTGAATTAAACCTTACTCTAGAGTagtgctgtccactagtaatata
17	29550403	29550523	NF1	121	TTATATCTGCATTAGGTTATTGATGATGCTAGTAACAATGAACTTTATGTTACTGCAGCTCACAAATGCTTTTTTACATCTGCAAGAAATTAACTAGTCATCAAATGCTTAGTAGCACAG
17	29550523	29550643	NF1	121	AAATTCTCAAGTGGTTGCGGGAAATATTGATCTGCAGGAATAAATTTCTTCTTAAAAATAAGGTAAGCAAAATGACATATTTAAAAAATGGAAGAATATTTGGAATGGTAATGGTGAGAG
17	29552070	29552190	NF1	121	TGTCAGTGCTTCAGTAAAGCTTATTTATTTATTTTTTTCTAGCAGGCAGATAGAAGTTCCTGTCACTTTCTCCTTTTTTACGGGGTAGGATGTGATATTCCTTCTAGTGGAAATACCAGT
17	29552190	29552310	NF1	121	CAAATGTCCATGGATCATGAAGAATTACTACGTACTCCTGGAGCCTCTCTCCGGAAGGGAAAAGGGAACTCCTCTATGGTCAGCTTCTTCTGTACTTTTTCTGTATCATTTTATGTGCTC
17	29553397	29553517	NF1	121	TTATACATAAAATTACCCAAGTTGCAAATATATGTCTTCCACCCTTGACTCTCAGGATAGTGCAGCAGGATGCAGCGGAACCCCCCCGATTTGCCGACAAGCCCAGACCAAACTAGAAGT
17	29553517	29553637	NF1	121	GGCCCTGTACATGTTTCTGTGGAACCCTGACACTGAAGCTGTTCTGGTTGCCATGTCCTGTTTCCGCCACCTCTGTGAGGAAGCAGATATCCGGTGTGGGGTGGATGAAGTGTCAGTGCA
17	29553637	29553757	NF1	121	TAACCTCTTGCCCAACTATAACACATTCATGGAGTTTGCCTCTGTCAGCAATATGATGTCAACAGGTAAATGTGAATAGTGGTTTTTTTTACTCAGTCTGCCTCAAAGCACATGGCATCT
17	29554212	29554332	NF1	121	GATTTGCTGTTGTATTTGCTTAGGAAGAGCAGCACTTCAGAAAAGAGTGATGGCACTGCTGAGGCGCATTGAGCATCCCACTGCAGGAAACACTGAGGTATGCCCTTAGCAACAGAAACA
17	29554522	29554642	NF1	121	TAATTGCCTTCATTTTAGGCTTGGGAAGATACACATGCAAAATGGGAACAAGCAACAAAGCTAATCCTTAACTATCCAAAAGCCAAAATGGAAGATGGCCAGGTAAGTCTGTAAAGTTGA
17	29556022	29556142	NF1	121	CACAAAAATTTTGTGTTTAGGCTGCTGAAAGCCTTCACAAGACCATTGTTAAGAGGCGAATGTCCCATGTGAGTGGAGGAGGATCCATAGATTTGTCTGACACAGACTCCCTACAGGAAT
17	29556142	29556262	NF1	121	GGATCAACATGACTGGCTTCCTTTGTGCCCTTGGGGGAGTGTGCCTCCAGCAGAGAAGCAATTCTGGCCTGGCAACCTATAGCCCACCCATGGGTCCAGTCAGTGAACGTAAGGGTTCTA
17	29556262	29556382	NF1	121	TGATTTCAGTGATGTCTTCAGAGGGAAACGCAGATACACCTGTCAGCAAATTTATGGATCGGCTGTTGTCCTTAATGGTGTGTAACCATGAGAAAGTGGGACTTCAAATACGGACCAATG
17	29556382	29556502	NF1	121	TTAAGGATCTGGTGGGTCTAGAATTGAGTCCTGCTCTGTATCCAATGCTATTTAACAAATTGAAGAATACCATCAGCAAGTTTTTTGACTCCCAAGGACAGGTAAAGTGTTCTCTTATTT
17	29556802	29556922	NF1	121	GTCTTCTGGGCATTGATGGCAAATCATTAATGTATTTGTTCTTTCTTTAGGTTTTATTGACTGATACCAATACTCAATTTGTAGAACAAACCATAGCTATAATGAAGAACTTGCTAGATA
17	29556922	29557042	NF1	121	ATCATACTGAAGGCAGCTCTGAACATCTAGGGCAAGCTAGCATTGAAACAATGATGTTAAATCTGGTCAGGTAAGCATTCTACTGAAATGTAGCAGAAACATTTTAAGAGATAAGAAAAA
17	29557219	29557339	NF1	121	AATGCCTTCTCTTTTGTCTATATCTGATAATTTTTTTATTGTTTCTATGTCTATATAGGTATGTTCGTGTGCTTGGGAATATGGTCCATGCAATTCAAATAAAAACGAAACTGTGTCAAT
17	29557339	29557459	NF1	121	TAGTTGAAGTAATGATGGCAAGGAGAGATGACCTCTCATTTTGCCAAGAGATGAAATTTAGGTGAGTTCTCAAAAGAGCAATGTAGGGTCTTGTAAATCTTAATATGTCCAATGAAGTAC
17	29557841	29557961	NF1	121	TTCTCCACCATTCTATAGGAATAAGATGGTAGAATACCTGACAGACTGGGTTATGGGAACATCAAACCAAGCAGCAGATGATGATGTAAAATGTCTTACAAGGTAAAAAAAGAATGACCT
17	29559088	29559208	NF1	121	AGAGATTTGGACCAGGCAAGCATGGAAGCAGTAGTTTCACTTCTAGCTGGTCTCCCTCTGCAGCCTGAAGAAGGAGATGGTGTGGAATTGATGGAAGCCAAATCACAGTTATTTCTTAAG
17	29559688	29559808	NF1	121	ATGTAAAGGTCAGTCTTTTTATTTCTCAGATACTTCACATTATTTATGAACCTTTTGAATGACTGCAGTGAAGTTGAAGATGAAAGTGCGCAAACAGGTGGCAGGAAACGTGGCATGTCT
17	29559808	29559928	NF1	121	CGGAGGCTGGCATCACTGAGGCACTGTACGGTCCTTGCAATGTCAAACTTACTCAATGCCAACGTAGACAGTGGTCTCATGCACTCCATAGGTGAGATCAAATGAAAGTTTCATATAGAA
17	29560005	29560125	NF1	121	TTTGTCCACATTAGGCTTAGGTTACCACAAGGATCTCCAGACAAGAGCTACATTTATGGAAGTTCTGACAAAAATCCTTCAACAAGGCACAGAATTTGACACACTTGCAGAAACAGTATT
17	29560125	29560245	NF1	121	GGCTGATCGGTTTGAGAGATTGGTGGAACTGGTCACAATGATGGGTGATCAAGGAGAACTCCCTATAGCGATGGCTCTGGCCAATGTGGTTCCTTGTTCTCAGTGGGTAAGTGATTAGAG
17	29562589	29562709	NF1	121	GGGATTGTTTGCACTAACCTGATTTTGTTTTGTTCTCAGGATGAACTAGCTCGAGTTCTGGTTACTCTGTTTGATTCTCGGCATTTACTCTACCAACTGCTCTGGAACATGTTTTCTAAA
17	29562709	29562829	NF1	121	GAAGTAGAATTGGCAGACTCCATGCAGACTCTCTTCCGAGGCAACAGCTTGGCCAGTAAAATAATGACATTCTGTTTCAAGGTTTGTATCATTCATTTTGTGTGTATGTGTGTGCTGAGG
17	29562927	29563047	NF1	121	TTCTGTAGGTATATGGTGCTACCTATCTACAAAAACTCCTGGATCCTTTATTACGAATTGTGATCACATCCTCTGATTGGCAACATGTTAGCTTTGAAGTGGATCCTACCAGGTTTGTCA
17	29575949	29576069	NF1	121	TGTTATTTGTTTTAAACAAAAGTGTTAGGATTTTATTTTTATTTTTTTGTAGGTTAGAACCATCAGAGAGCCTTGAGGAAAACCAGCGGAACCTCCTTCAGATGACTGAAAAGTTCTTCC
17	29576069	29576189	NF1	121	ATGCCATCATCAGTTCCTCCTCAGAATTCCCCCCTCAACTTCGAAGTGTGTGCCACTGTTTATACCAGGTATGCTTACAGTTAGAGATTACCATTATTAATCTAAAGTTAAATTATGAAG
17	29579927	29580047	NF1	121	CTTGTTTGTGCTCATCTCTGTTCTGTAGGCAACTTGCCACTCCCTACTGAATAAAGCTACAGTAAAAGAAAAAAAGGAAAACAAAAAATCAGTAAGTTTGGAGAACTTTTTATTAGCTGT
17	29585321	29585441	NF1	121	ATTCAAACCTTATACTCAATTCTCAACTCCTTGTTTTTAGGTGGTTAGCCAGCGTTTCCCTCAGAACAGCATCGGTGCAGTAGGAAGTGCCATGTTCCTCAGATTTATCAATCCTGCCAT
17	29585441	29585561	NF1	121	TGTCTCACCGTATGAAGCAGGGATTTTAGATAAAAAGCCACCACCTAGAATCGAAAGGGGCTTGAAGTTAATGTCAAAGGTGAATTATTTTGATAATCTAGCTATCTTAAATTCCCCTTC
17	29586038	29586158	NF1	121	TTATTGTGTAGATACTTCAGAGTATTGCCAATCATGTTCTCTTCACAAAAGAAGAACATATGCGGCCTTTCAATGATTTTGTGAAAAGCAACTTTGATGCAGCACGCAGGTAATTTTCTT
17	29587340	29587460	NF1	121	GGGTGTATCTGGTGTTGAAAATTCTAATGACTTTGCATTTTTGAAGGTTTTTCCTTGATATAGCATCTGATTGTCCTACAAGTGATGCAGTAAATCATAGTCTTTCCTTCATAAGTGACG
17	29587460	29587580	NF1	121	GCAATGTGCTTGCTTTACATCGTCTACTCTGGAACAATCAGGAGAAAATTGGGCAGTATCTTTCCAGCAACAGGTAAGATTTCCCAGTCATGGGGATAGTGAACACTCTCCGTTTAAATT
17	29588682	29588802	NF1	121	AAATGTGAACTGCTAATTTTTTTTCTAAGTAGTTTGCTGTATCTAGGGATCATAAAGCTGTTGGAAGACGACCTTTTGATAAGATGGCAACACTTCTTGCATACCTGGGTCCTCCAGAGC
17	29588802	29588922	NF1	121	ACAAACCTGTGGCAGATACACACTGGTCCAGCCTTAACCTTACCAGTTCAAAGTTTGAGGAATTTATGACTAGGTAAAGTACAACCTTGAAATAGTTGATTGCTTTCTTTTTGGTTGAGA
17	29592242	29592362	NF1	121	TTAGGCATCAGGTACATGAAAAAGAAGAATTCAAGGCTTTGAAAACGTTAAGTATTTTCTACCAAGCTGGGACTTCCAAAGCTGGGAATCCTATTTTTTATTATGTTGCACGGAGGTAAG
17	29652813	29652933	NF1	121	TGTCTTTTTTGTCATTTTCCTTAGGTTCAAAACTGGTCAAATCAATGGTGATTTGCTGATATACCATGTCTTACTGACTTTAAAGCCATATTATGCAAAGCCATATGAAATTGTAGTGGA
17	29652933	29653053	NF1	121	CCTTACCCATACCGGGCCTAGCAATCGCTTTAAAACAGACTTTCTCTCTAAGTGGTTTGTTGTTTTTCCTGGCTTTGCTTACGACAACGTCTCCGCAGTCTATATCTATAACTGTAACTC
17	29653053	29653173	NF1	121	CTGGGTCAGGGAGTACACCAAGTATCATGAGCGGCTGCTGACTGGCCTCAAAGGTAGCAAAAGGCTTGTTTTCATAGACTGTCCTGGGAAACTGGCTGAGCACATAGAGCATGAACAACA
17	29653173	29653293	NF1	121	GAAACTACCTGCTGCCACCTTGGCTTTAGAAGAGGACCTGAAGGTATTCCACAATGCTCTCAAGCTAGCTCACAAAGACACCAAAGTTTCTATTAAAGTAAGTTCCAGTCTGTGTTTTGT
17	29654506	29654626	NF1	121	CACTTTCCAGGTTGGTTCTACTGCTGTCCAAGTAACTTCAGCAGAGCGAACAAAAGTCCTAGGGCAATCAGTCTTTCTAAATGACATTTATTATGCTTCGGAAATTGAAGAAATCTGCCT
17	29654626	29654746	NF1	121	AGTAGATGAGAACCAGTTCACCTTAACCATTGCAAACCAGGGCACGCCGCTCACCTTCATGCACCAGGAGTGTGAAGCCATTGTCCAGTCTATCATTCATATCCGGACCCGCTGGGAACT
17	29654746	29654866	NF1	121	GTCACAGCCCGACTCTATCCCCCAACACACCAAGATTCGGCCAAAAGATGTCCCTGGGACACTGCTCAATATCGCATTACTTAATTTAGGCAGTTCTGACCCGAGTTTACGGTAGGTTTT
17	29657295	29657415	NF1	121	ATTTGTGTTTTCTCCTAGGTCAGCTGCCTATAATCTTCTGTGTGCCTTAACTTGTACCTTTAATTTAAAAATCGAGGGCCAGTTACTAGAGACATCAGGTTTATGTATCCCTGCCAACAA
17	29657415	29657535	NF1	121	CACCCTCTTTATTGTCTCTATTAGTAAGACACTGGCAGCCAATGAGCCACACCTCACGTTAGAATTTTTGGAAGAGTGTATTTCTGGATTTAGCAAATCTAGTAAGTAATGATAATTTTC
17	29661832	29661952	NF1	121	GCTAATAGTGTATTTTTTTCCAGGTATTGAATTGAAACACCTTTGTTTGGAATACATGACTCCATGGCTGTCAAATCTAGTTCGTTTTTGCAAGCATAATGATGATGCCAAACGACAAAG
17	29661952	29662072	NF1	121	AGTTACTGCTATTCTTGACAAGCTGATAACAATGACCATCAATGAAAAACAGATGTACCCATCTATTCAAGCAAAAATATGGGGAAGCCTTGGGCAGGTATTGAGTTTGCTCAAATATTT
17	29663300	29663420	NF1	121	attaaattGGTAGAGTGATTAAAAACATGTTATTTTCCTTCTTCAACTAGATTACAGATCTGCTTGATGTTGTACTAGACAGTTTCATCAAAACCAGTGCAACAGGTGGCTTGGGATCAA
17	29663420	29663540	NF1	121	TAAAAGCTGAGGTGATGGCAGATACTGCTGTAGCTTTGGCTTCTGGAAATGTGAAATTGGTTTCAAGCAAGGTAATCACTTTTCTTTTGCCTTCTGTACTATAGCATATCTGTTTTATCA
17	29663612	29663732	NF1	121	TGtttttttttttaaaaaaaaaaatCCTGCTTCTTTACAGGTTATTGGAAGGATGTGCAAAATAATTGACAAGACATGCTTATCTCCAACTCCTACTTTAGAACAACATCTTATGTGGGA
17	29663732	29663852	NF1	121	TGATATTGCTATTTTAGCACGCTACATGCTGATGCTGTCCTTCAACAATTCCCTTGATGTGGCAGCTCATCTTCCCTACCTCTTCCACGTTGTTACTTTCTTAGTAGCCACAGGTCCGCT
17	29663852	29663972	NF1	121	CTCCCTTAGAGCTTCCACACATGGACTGGTCATTAATATCATTCACTCTCTGTGTACTTGTTCACAGCTTCATTTTAGTGGTAAGTTCTAGGAAAGGAATTTGTGTTTACCAGTTCCTTT
17	29664373	29664493	NF1	121	ATTCTCTTACAGAAGAGACCAAGCAAGTTTTGAGACTCAGTCTGACAGAGTTCTCATTACCCAAATTTTACTTGCTGTTTGGCATTAGCAAAGTCAAGTCAGCTGCTGTCATTGCCTTCC
17	29664493	29664613	NF1	121	GTTCCAGTTACCGGGACAGGTCATTCTCTCCTGGCTCCTATGAGAGAGAGACTTTTGCTTTGACATCCTTGGAAACAGTCACAGAAGCTTTGTTGGAGATCATGGAGGTATAGAAGCCAA
17	29664807	29664927	NF1	121	ATATGTATTCAGAGTATCCCCTTTTTTAGGCATGCATGAGAGATATTCCAACGTGCAAGTGGCTGGACCAGTGGACAGAACTAGCTCAAAGGTATGTCCTAAATTAAATATAAGTTGTAA
17	29665040	29665160	NF1	121	AGATTTGCATTCCAATATAATCCATCCCTGCAACCAAGAGCTCTTGTTGTCTTTGGGTGTATTAGCAAACGAGTGTCTCATGGGCAGATAAAGCAGATAATCCGTATTCTTAGCAAGGTA
17	29665712	29665832	NF1	121	TCCTAAAAGGCACTTGAGAGTTGCTTAAAAGGACCTGACACTTACAACAGTCAAGTTCTGATAGAAGCTACAGTAATAGCACTAACCAAATTACAGCCACTTCTTAATAAGGTAATTACT
17	29667472	29667592	NF1	121	GACTATGTCATGATTCATCTTACTAGCCTCAAACATATCTTCTTTGCCAGGACTCGCCTCTGCACAAAGCCCTCTTTTGGGTAGCTGTGGCTGTGCTGCAGCTTGATGAGGTCAACTTGT
17	29667592	29667712	NF1	121	ATTCAGCAGGTACCGCACTTCTTGAACAAAACCTGCATACTTTAGATAGTCTCCGTATATTCAATGACAAGGTAAGCAAACTTTGCCTTGAGGTTCCTAGATTACTCAAATTTAGTACTC
17	29669970	29670090	NF1	121	TTTAAAGAAAGCTACTGTGTGAACCTCATCAACCATCTCATGATTATCTTTAATAGAGTCCAGAGGAAGTATTTATGGCAATCCGGAATCCTCTGGAGTGGCACTGCAAGCAAATGGATC
17	29670090	29670210	NF1	121	ATTTTGTTGGACTCAATTTCAACTCTAACTTTAACTTTGCATTGGTTGGACACCTTTTAAAAGGTAAAAAAGCCTTATTTAGAATATTTTTATGAAGTACTATTAAGAAACCAGAAGTAA
17	29676083	29676203	NF1	121	GTTCAAAAAATTAATTCTTACttgtttgtttgtttgtttgtttgttttttgtAGGGTACAGGCATCCTTCACCTGCTATTGTTGCAAGAACAGTCAGAATTTTACATACACTACTAACTC
17	29676203	29676323	NF1	121	TGGTTAACAAACACAGAAATTGTGACAAATTTGAAGTGAATACACAGAGCGTGGCCTACTTAGCAGGTAAAAACACAAAATAAACAAAATTAATCTTGCTACATCTATATATAAGGATCA
17	29677148	29677268	NF1	121	GTCACACTTGTGATTTGTTAAATTTTTTAACCTGCCACCGTTTTCCTTTTAGCTTTACTTACAGTGTCTGAAGAAGTTCGAAGTCGCTGCAGCCTAAAACATAGAAAGTCACTTCTTCTT
17	29677268	29677388	NF1	121	ACTGATATTTCAATGGAAAATGTTCCTATGGATACATATCCCATTCATCATGGTGACCCTTCCTATAGGTAAGTGGATTTACTCTCCTATAATTACATAATCATAATCAAGTTTCAATTT
17	29679233	29679353	NF1	121	ACCATATTAATTGATTTTTCTCTATTGTTTTCATCTTTCAGGACACTAAAGGAGACTCAGCCATGGTCCTCTCCCAAAGGTTCTGAAGGATACCTTGCAGCCACCTATCCAACTGTCGGC
17	29679353	29679473	NF1	121	CAGACCAGTCCCCGAGCCAGGAAATCCATGAGCCTGGACATGGGGCAACCTTCTCAGGCCAACACTAAGAAGTTGCTTGGTTAGTTTATCTAAATTATGTAGattttttttattatttaa
17	29683419	29683539	NF1	121	TTCCCATTTATAGACACTGTAGTTAATGAACTTGCATATTCTTAACTTTTGTTTATAGGAACAAGGAAAAGTTTTGATCACTTGATATCAGACACAAAGGCTCCTAAAAGGCAAGAAATG
17	29683539	29683659	NF1	121	GAATCAGGGATCACAACACCCCCCAAAATGAGGAGAGTAGCAGAAACTGATTATGAAATGGGTGAGAAACAAAGTATTGATCTAGATCATTGAAAATAAGGTGGGAGAGTACATGAAAGT
17	29683923	29684043	NF1	121	AGGTGAAGTGATTATCCAGGTGTTTGATCACGTTAATTCCCTATCTTGCTGCAGAAACTCAGAGGATTTCCTCATCACAACAGCACCCACATTTACGTAAAGTTTCAGTGTCTGAATCAA
17	29684043	29684163	NF1	121	ATGTTCTCTTGGATGAAGAAGTACTTACTGATCCGAAGATCCAGGCGCTGCTTCTTACTGTTCTAGTAAGGATTTCCCCTTTTTGAGTCCCCCACCCTCAAATTTTTATTCCAGTCTACT
17	29684276	29684396	NF1	121	ATCTTGGCAGGCTACACTGGTAAAATATACCACAGATGAGTTTGATCAACGAATTCTTTATGAATACTTAGCAGAGGCCAGTGTTGTGTTTCCCAAAGTCTTTCCTGTTGTGTAAGTATC
17	29685449	29685569	NF1	121	TTAATTTTCCTCTAAAATGTTCCTCTGTTGACTTTTTTTTTCTTTTAGGCATAATTTGTTGGACTCTAAGATCAACACCCTGTTATCATTGTGCCAAGATCCAAATTTGTTAAATCCAAT
17	29685569	29685689	NF1	121	CCATGGAATTGTGCAGAGTGTGGTGTACCATGAAGAATCCCCACCACAATACCAAACATCTTACCTGCAAAGTAAATAAATGTATCTGGAGAAGGATGGTTGATGAACTTGCTAACATGC
17	29685950	29686070	NF1	121	TTGCTTGTTATAAGAGTAAAATTTGATTTGTTGCAGGTTTTGGTTTTAATGGCTTGTGGCGGTTTGCAGGACCGTTTTCAAAGGTAAGAAAATATATTTTTCTCTAACTTTTGGCAAAAT
17	29687492	29687612	NF1	121	TTTCCATTACAGCAAACACAAATTCCAGACTATGCTGAGCTTATTGTTAAGTTTCTTGATGCCTTGATTGACACGTACCTGCCTGGAATTGATGAAGAAACCAGTGAAGAATCCCTCCTG
17	29687612	29687732	NF1	121	ACTCCCACATCTCCTTACCCTCCTGCACTGCAGAGCCAGCTTAGTATCACTGCCAACCTTAACCTTTCTAATTCCATGACCTCACTTGCAACTTCCCAGCATTCCCCAGGTCAGTAAATG
17	29689283	29689403	NF1	121	TTAAAATTTACTTTTTTTACAGATACTGCAGCCACTGAATTCCTTCCTGCTTCCCCGCTGATAAACCTTTTAGCATTTTGGAGCTAGGGAACCATACAGGTAATTTAGTTTTAGGCTCAC
17	29694209	29694329	NF1	121	TACTTGCTTTTTTTTCTTCCATTCTTTGTAAAGCTTCTCTGCCTTGCTCTAAATCAGCAGTTTTCATGCAGCTGTTCCCTCATCAAGGTACTCTTTATTTTCATCATCTTTGCACGAAAA
17	29700981	29701101	NF1	121	AGTCCTGGAAGGAAAAGAAGAAGTAACTGGCTGTTCTCTTTTTCTCCAGGAATCGACAAGGAGAACGTTGAACTCTCCCCTACCACTGGCCACTGTAACAGTGGACGAACTCGCCACGGA
17	29701101	29701221	NF1	121	TCCGCAAGCCAAGTGCAGAAGCAAAGAAGCGCTGGCAGTTTCAAACGTAATAGCATTAAGAAGATCGTGTGAAGCTTGCTTGCTTTCTTTTTTAAAATCAACTTAACATGGGCTCTTCAC
17	37855732	37855851	ERBB2	120	TTCGATGTGACTGTCTCCTCCCAAATTTGTAGACCCTCTTAAGATCATGCTTTTCAGATACTTCAAAGATTCCAGAAGATATGCCCCGGGGGTCCTGgaagccacaaggtaaacacaac
17	37856229	37856349	ERBB2	121	CGCTTGCTCCCAATCACaggagaaggaggaggtggaggaggaggGCTGCTTGAGGAAGTATAAGAATGAAGTTGTGAAGCTGAGATTCCCCTCCATTGGGACCGGAGAAACCAGGGGAGC
17	37856349	37856469	ERBB2	121	CCCCCGGGCAGCCGCGCGCCCCTTCCCACGGGGCCCTTTACTgcgccgcgcgcccggcccccacccctcgcagcaccccgcgccccgcgcccTCCCAGCCGGGTCCAGCCGGAGCCATGG
17	37856469	37856589	ERBB2	121	GGCCGGAGCCGCAGTGAGCACCATGGAGCTGGCGGCCTTGTGCCGCTGGGGGCTCCTCCTCGCCCTCTTGCCCCCCGGAGCCGCGAGCACCCAAGGTGGGTCTGGTGTGGGGAGGGGACG
17	37863197	37863317	ERBB2	121	GGTCCCCCGCCAGTGTCCTCTGACCCATCTGCTCTCTCCTGCCAGTGTGCACCGGCACAGACATGAAGCTGCGGCTCCCTGCCAGTCCCGAGACCCACCTGGACATGCTCCGCCACCTCT
17	37863317	37863437	ERBB2	121	ACCAGGGCTGCCAGGTGGTGCAGGGAAACCTGGAACTCACCTACCTGCCCACCAATGCCAGCCTGTCCTTCCTGCAGGTGAGGCCCGTGGGCAACCCAGCCAGGCCCTGCCTCCAGCTGG
17	37864560	37864680	ERBB2	121	TTCCCCCTCCCAGGATATCCAGGAGGTGCAGGGCTACGTGCTCATCGCTCACAACCAAGTGAGGCAGGTCCCACTGCAGAGGCTGCGGATTGTGCGAGGCACCCAGCTCTTTGAGGACAA
17	37864680	37864800	ERBB2	121	CTATGCCCTGGCCGTGCTAGACAATGGAGACCCGCTGAACAATACCACCCCTGTCACAGGGGCCTCCCCAGGAGGCCTGCGGGAGCTGCAGCTTCGAAGCCTCACAGGTGGCCTTCACCG
17	37865518	37865638	ERBB2	121	GCAGAAGGTGACAGAAGGGGAAAGGGTCCTCTGATCATTGCTCACCCCACAGAGATCTTGAAAGGAGGGGTCTTGATCCAGCGGAACCCCCAGCTCTGCTACCAGGACACGATTTTGTGG
17	37865638	37865758	ERBB2	121	AAGGACATCTTCCACAAGAACAACCAGCTGGCTCTCACACTGATAGACACCAACCGCTCTCGGGCCTGTAAGCCATGCCCCTCCCTGCTGCCTCTTCTCTCAGACAGCCTGACCCCAGCC
17	37866039	37866159	ERBB2	121	CTGCCTGTCTCTGGTTCTGTCCTCAGGCCACCCCTGTTCTCCGATGTGTAAGGGCTCCCGCTGCTGGGGAGAGAGTTCTGAGGATTGTCAGAGCCGTGAGTCTCAGGGAGGCCTGGAGTC
17	37866336	37866456	ERBB2	121	AGTGACGCGCACTGTCTGTGCCGGTGGCTGTGCCCGCTGCAAGGGGCCACTGCCCACTGACTGCTGCCATGAGCAGTGTGCTGCCGGCTGCACGGGCCCCAAGCACTCTGACTGCCTGGT
17	37866543	37866663	ERBB2	121	CACACCAGGGCAAAACAGCACAGTGAAAGCCAGCCACCTGTCCCCCCAGGCCTGCCTCCACTTCAACCACAGTGGCATCTGTGAGCTGCACTGCCCAGCCCTGGTCACCTACAACACAGA
17	37866663	37866783	ERBB2	121	CACGTTTGAGTCCATGCCCAATCCCGAGGGCCGGTATACATTCGGCGCCAGCTGTGTGACTGCCTGTCCCTGTGAGTGCCAGGGAGAAACACAGTTTTCTCATTTTGGTGGGGAGGTTTG
17	37868120	37868240	ERBB2	121	CTGCTCATGGTGGTGCACGAAGGGCCAGGGTATGTGGCTACATGTTCCTGATCTCCTTAGACAACTACCTTTCTACGGACGTGGGATCCTGCACCCTCGTCTGCCCCCTGCACAACCAAG
17	37868240	37868360	ERBB2	121	AGGTGACAGCAGAGGATGGAACACAGCGGTGTGAGAAGTGCAGCAAGCCCTGTGCCCGAGGTACCCACTCACTGCCCCCGAGGCCAGCTGCAGTTCCTGTCCCTCTGCGCATGCAGCCTG
17	37868518	37868638	ERBB2	121	CTGTCCCGGTATGAAGGCTGAGACGGCCCCTTCCCCACCCACCCCCACCTCCTCAGTGTGCTATGGTCTGGGCATGGAGCACTTGCGAGAGGTGAGGGCAGTTACCAGTGCCAATATCCA
17	37868638	37868758	ERBB2	121	GGAGTTTGCTGGCTGCAAGAAGATCTTTGGGAGCCTGGCATTTCTGCCGGAGAGCTTTGATGGGTAAGAGTGGGCACGATGACCTGAGACAGTGTCAGGGCAGACAGAGTCCTGAGGATC
17	37871515	37871635	ERBB2	121	GACTCCTCTCCTGACCCCTCCAGGGACCCAGCCTCCAACACTGCCCCGCTCCAGCCAGAGCAGCTCCAAGTGTTTGAGACTCTGGAAGAGATCACAGGTGGGCTCTGTCTCTGCATCCTG
17	37871684	37871804	ERBB2	121	CCCTCTGCCTGCAGGTTACCTATACATCTCAGCATGGCCGGACAGCCTGCCTGACCTCAGCGTCTTCCAGAACCTGCAAGTAATCCGGGGACGAATTCTGCACAAGTGAGCACTGAGAAA
17	37871972	37872092	ERBB2	121	TGCCCACCTTTCTCCCATAGTGGCGCCTACTCGCTGACCCTGCAAGGGCTGGGCATCAGCTGGCTGGGGCTGCGCTCACTGAGGGAACTGGGCAGTGGACTGGCCCTCATCCACCATAAC
17	37872092	37872212	ERBB2	121	ACCCACCTCTGCTTCGTGCACACGGTGCCCTGGGACCAGCTCTTTCGGAACCCGCACCAAGCTCTGCTCCACACTGCCAACCGGCCAGAGGACGAGTGTGGTAAGACAGGGAGCCCAGTG
17	37872499	37872619	ERBB2	121	TGGACCTGGGGCCTCCCCTAAAAGTCCCCTGCGGTCCCTTCCTCCTCACTGCAGTGGGCGAGGGCCTGGCCTGCCACCAGCTGTGCGCCCGAGGGCACTGCTGGGGTCCAGGGCCCACCC
17	37872619	37872739	ERBB2	121	AGTGTGTCAACTGCAGCCAGTTCCTTCGGGGCCAGGAGTGCGTGGAGGAATGCCGAGTACTGCAGGGGTATGAGGGGCGGAGGAGAGGGTGGCTGGAGGGGTGCATGGGGCTCCTCTCAG
17	37872753	37872873	ERBB2	121	GTCCCTTCTCTCAGGCTCCCCAGGGAGTATGTGAATGCCAGGCACTGTTTGCCGTGCCACCCTGAGTGTCAGCCCCAGAATGGCTCAGTGACCTGTTTTGGACCGGTGAGCTGCTGGCGG
17	37873532	37873652	ERBB2	121	TCAGTGCCAGCCCCCCACAAATCTTTTCTGCCCCCCCCAGGAGGCTGACCAGTGTGTGGCCTGTGCCCACTATAAGGACCCTCCCTTCTGCGTGGCCCGCTGCCCCAGCGGTGTGAAACC
17	37873652	37873772	ERBB2	121	TGACCTCTCCTACATGCCCATCTGGAAGTTTCCAGATGAGGAGGGCGCATGCCAGCCTTGCCCCATCAACTGCACCCACTCGTGAGTCCAACGGTCTTTTCTGCAGAAAGGAGGACTTTC
17	37876003	37876123	ERBB2	121	TTCCCAGAATTGTTGATGAGACTGTTTCTCCTGCAGCTGTGTGGACCTGGATGACAAGGGCTGCCCCGCCGAGCAGAGAGCCAGGTTGGCCTGGACCCCAGGATGTACCCTTCATTGCCC
17	37879521	37879641	ERBB2	121	CTCCCACCCCAAACTAGCCCTCAATCCCTGACCCTGGCTTCCGCCCCCAGCCCTCTGACGTCCATCATCTCTGCGGTGGTTGGCATTCTGCTGGTCGTGGTCTTGGGGGTGGTCTTTGGG
17	37879641	37879761	ERBB2	121	ATCCTCATCAAGCGACGGCAGCAGAAGATCCGGAAGTACACGATGCGGAGACTGCTGCAGGAAACGGAGGTGAGGCGGGGTGAAGTCCTCCCAGCCCGCGTGGGGTCTGCACCGGCCCCC
17	37879732	37879852	ERBB2	121	CAGCCCGCGTGGGGTCTGCACCGGCCCCCGGCACTGACCCACCACCCCCTCACCCCAGCTGGTGGAGCCGCTGACACCTAGCGGAGCGATGCCCAACCAGGCGCAGATGCGGATCCTGAA
17	37879852	37879972	ERBB2	121	AGAGACGGAGCTGAGGAAGGTGAAGGTGCTTGGATCTGGCGCTTTTGGCACAGTCTACAAGGTCAGGGCCAGGTCCTGGGGTGGGCGGCCCCAGAGGATGGGGGCGGTGCCTGGAGGGGT
17	37880154	37880274	ERBB2	121	TTCTGCCCAGGGCATCTGGATCCCTGATGGGGAGAATGTGAAAATTCCAGTGGCCATCAAAGTGTTGAGGGAAAACACATCCCCCAAAGCCAACAAAGAAATCTTAGACGTAAGCCCCTC
17	37880951	37881071	ERBB2	121	ACCCTCTCAGCGTACCCTTGTCCCCAGGAAGCATACGTGATGGCTGGTGTGGGCTCCCCATATGTCTCCCGCCTTCTGGGCATCTGCCTGACATCCACGGTGCAGCTGGTGACACAGCTT
17	37881071	37881191	ERBB2	121	ATGCCCTATGGCTGCCTCTTAGACCATGTCCGGGAAAACCGCGGACGCCTGGGCTCCCAGGACCTGCTGAACTGGTGTATGCAGATTGCCAAGGTATGCACCTGGGCTCTTTGCAGGTCT
17	37881259	37881379	ERBB2	121	CAGGCCCTCCCAGAAGGTCTACATGGGTGCTTCCCATTCCAGGGGATGAGCTACCTGGAGGATGTGCGGCTCGTACACAGGGACTTGGCCGCTCGGAACGTGCTGGTCAAGAGTCCCAAC
17	37881379	37881499	ERBB2	121	CATGTCAAAATTACAGACTTCGGGCTGGCTCGGCTGCTGGACATTGACGAGACAGAGTACCATGCAGATGGGGGCAAGGTTAGGTGAAGGACCAAGGAGCAGAGGAGGCTGGGTGGAGTG
17	37881557	37881677	ERBB2	121	ACTTCCTCTTCTGCCCTCCCAGGTGCCCATCAAGTGGATGGCGCTGGAGTCCATTCTCCGCCGGCGGTTCACCCACCAGAGTGATGTGTGGAGTTATGGTGTGTGATGGGGGGTGTTGGG
17	37881913	37882033	ERBB2	121	AAAGCTCCCTCTGGCCCTCCCACTCCTGACCCTGTCTCTGCCTTAGGTGTGACTGTGTGGGAGCTGATGACTTTTGGGGCCAAACCTTACGATGGGATCCCAGCCCGGGAGATCCCTGAC
17	37882033	37882153	ERBB2	121	CTGCTGGAAAAGGGGGAGCGGCTGCCCCAGCCCCCCATCTGCACCATTGATGTCTACATGATCATGGTCAAATGTGCGTGGCTGAGCTGTGCTGGCTGCCTGGAGGAGGGTGGGAGGTCC
17	37882803	37882923	ERBB2	121	TCCTGCCCCAGGTTGGATGATTGACTCTGAATGTCGGCCAAGATTCCGGGAGTTGGTGTCTGAATTCTCCCGCATGGCCAGGGACCCCCAGCGCTTTGTGGTCATCCAGGTACTGGGCCT
17	37883041	37883161	ERBB2	121	CCATCCTGCCTCTCCTTCCTCCACAGAATGAGGACTTGGGCCCAGCCAGTCCCTTGGACAGCACCTTCTACCGCTCACTGCTGGAGGACGATGACATGGGGGACCTGGTGGATGCTGAGG
17	37883161	37883281	ERBB2	121	AGTATCTGGTACCCCAGCAGGGCTTCTTCTGTCCAGACCCTGCCCCGGGCGCTGGGGGCATGGTCCACCACAGGCACCGCAGCTCATCTACCAGGGTCAGTGCCCTCGGTCACACTGTGT
17	37883493	37883613	ERBB2	121	CCCCATCCCAGATCCGTGAGTGACCCCCATCATGACTTTCTTTCTTGTCCCCAGAGTGGCGGTGGGGACCTGACACTAGGGCTGGAGCCCTCTGAAGAGGAGGCCCCCAGGTCTCCACTG
17	37883613	37883733	ERBB2	121	GCACCCTCCGAAGGGGCTGGCTCCGATGTATTTGATGGTGACCTGGGAATGGGGGCAGCCAAGGGGCTGCAAAGCCTCCCCACACATGACCCCAGCCCTCTACAGCGGTACAGTGAGGAC
17	37883733	37883853	ERBB2	121	CCCACAGTACCCCTGCCCTCTGAGACTGATGGCTACGTTGCCCCCCTGACCTGCAGCCCCCAGCCTGGTATGGAGTCCAGTCTAAGCAGAGAGACTGATGGGCAGGGGAGGTGGGACCTT
17	37883939	37884059	ERBB2	121	AGAATATGTGAACCAGCCAGATGTTCGGCCCCAGCCCCCTTCGCCCCGAGAGGGCCCTCTGCCTGCTGCCCGACCTGCTGGTGCCACTCTGGAAAGGCCCAAGACTCTCTCCCCAGGGAA
17	37884059	37884179	ERBB2	121	GAATGGGGTCGTCAAAGACGTTTTTGCCTTTGGGGGTGCCGTGGAGAACCCCGAGTACTTGACACCCCAGGGAGGAGCTGCCCCTCAGCCCCACCCTCCTCCTGCCTTCAGCCCAGCCTT
17	37884179	37884299	ERBB2	121	CGACAACCTCTATTACTGGGACCAGGACCCACCAGAGCGGGGGGCTCCACCCAGCACCTTCAAAGGGACACCTACGGCAGAGAACCCAGAGTACCTGGGTCTGGACGTGCCAGTGTGAAC
18	48575109	48575142	SMAD4	34	CCTGATCTTCACAAAAATGAACTAAAACATGTT
18	48575142	48575229	SMAD4	88	AAATATTGTCAGTATGCGTTTGACTTAAAATGTGATAGTGTCTGTGTGAATCCATATCACTACGAACGAGTTGTATCACCTGGAATT
18	48575619	48575731	SMAD4	113	TGTAATGATTAATGTTTCATTTGTTTTCCCCTTTAAACAATTAAGATCTCTCAGGATTAACACTGCAGAGTAATGGTAGGTAATCTGTTTCTTACTACTTTCTCTTTGTTTT
18	48581138	48581256	SMAD4	119	ttttCTATATAGCTCCATCAAGTATGATGGTGAAGGATGAATATGTGCATGACTTTGAGGGACAGCCATCGTTGTCCACTGAAGGACATTCAATTCAAACCATCCAGCATCCACCAAG
18	48581256	48581258	SMAD4	3	TA
18	48584500	48584554	SMAD4	55	CTGCCAGTATACTGGGGGGCAGCCATAGTGAAGGACTGTTGCAGATAGCATCAG
18	48584554	48584662	SMAD4	109	GGCCTCAGCCAGGACAGCAGCAGAATGGATTTACTGGTCAGCCAGCTACTTACCATCATAGTATGTACATACTTTAAAAAATCTTTTAAATAGTTGAGAAAAAAGTAG
18	48586231	48586321	SMAD4	91	TTAGGGCCTGTTCACAATGAGCTTGCATTCCAGCCTCCCATTTCCAATCATCCTGGTAAGTGTATTTCAAAATTGATTTCCTGTATTTAG
18	48591791	48591884	SMAD4	94	GCTCCTGAGTATTGGTGTTCCATTGCTTACTTTGAAATGGATGTTCAGGTAGGAGAGACATTTAAGGTTCCTTCAAGCTGCCCTATTGTTACT
18	48591884	48591955	SMAD4	72	GTTGATGGATACGTGGACCCTTCTGGAGGAGATCGCTTTTGTTTGGGTCAACTCTCCAATGTCCACAGGAC
18	48593352	48593472	SMAD4	121	ATCAAGATAAAATGTAATTTCTTTTTTCTTCCTAAGGTTGCACATAGGCAAAGGTGTGCAGTTGGAATGTAAAGGTGAAGGTGATGTTTGGGTCAGGTGCCTTAGTGACCACGCGGTCTT
18	48593472	48593538	SMAD4	67	TGTACAGAGTTACTACTTAGACAGAGAAGCTGGGCGTGCACCTGGAGATGCTGTTCATAAGATCTA
18	48602942	48603061	SMAD4	120	ATTGGTTTTTAATGTATGGAATTTTTCTTTATGAACTCATAGTATGAAATGTTTTTTCTTAAAAGGTCTTTGATTTGCGTCAGTGTCATCGACAGATGCAGCAGCAGGCGGCTACTGCA
18	48603078	48603198	SMAD4	121	CCAGGCAGCAGCCGTGGCAGGAAACATCCCTGGCCCAGGATCAGTAGGTGGAATAGCTCCAGCTATCAGTAAGTATGCTTTTCATTCTTTTTTAAAGGTATAATAGTTGATATTTTTATC
18	48604614	48604731	SMAD4	118	TTTTCTGTTAGGTCTGTCAGCTGCTGCTGGAATTGGTGTTGATGACCTTCGTCGCTTATGCATACTCAGGATGAGTTTTGTGAAAGGCTGGGGACCGGATTACCCAAGACAGAGCAT
18	48604731	48604807	SMAD4	77	CAAAGAAACACCTTGCTGGATTGAAATTCACTTACACCGGGCCCTCCAGCTCCTAGACGAAGTACTTCATACCATG
19	1206877	1206997	STK11	121	GGCTGGCGGCGGGACTCCAGGACCCTGGGTCCAGCATGGAGGTGGTGGACCCGCAGCAGCTGGGCATGTTCACGGAGGGCGAGCTGATGTCGGTGGGTATGGACACGTTCATCCACCGCA
19	1206997	1207117	STK11	121	TCGACTCCACCGAGGTCATCTACCAGCCGCGCCGCAAGCGGGCCAAGCTCATCGGCAAGTACCTGATGGGGGACCTGCTGGGGGAAGGCTCTTACGGCAAGGTGAAGGAGGTGCTGGACT
19	1207117	1207237	STK11	121	CGGAGACGCTGTGCAGGAGGGCCGTCAAGATCCTCAAGAAGAAGAAGTTGCGAAGGATCCCCAACGGGGAGGCCAACGTGAAGAAGTAAGTATGGCTTGCTGGGGTCGGGGCCGGGCCGG
19	1218397	1218517	STK11	121	CTGTCCTCTCTGTCCCAGGGAAATTCAACTACTGAGGAGGTTACGGCACAAAAATGTCATCCAGCTGGTGGATGTGTTATACAACGAAGAGAAGCAGAAAATATATCCTTTCCGGTGTTG
19	1219307	1219427	STK11	121	TCCTTAGCGCCCCACGTATATGGTGATGGAGTACTGCGTGTGTGGCATGCAGGAAATGCTGGACAGCGTGCCGGAGAAGCGTTTCCCAGTGTGCCAGGCCCACGGGTGCGTGCGCGGGGC
19	1220317	1220437	STK11	121	CCCTGTGAGGGGCAGGGAGGCCTCGGCCCCAGGACGGGTGTGTGCTGCCCGCAGGTACTTCTGTCAGCTGATTGACGGCCTGGAGTACCTGCATAGCCAGGGCATTGTGCACAAGGACAT
19	1220437	1220557	STK11	121	CAAGCCGGGGAACCTGCTGCTCACCACCGGTGGCACCCTCAAAATCTCCGACCTGGGCGTGGCCGAGGTAGGCACGTGCTAGGGGGGGCCCTGGGGCGCCCCCTCCCGGGCACTCCCTGA
19	1220527	1220647	STK11	121	CTGGGGCGCCCCCTCCCGGGCACTCCCTGAGGGCTGCACGGCACCGCCACAGGCACTGCACCCGTTCGCGGCGGACGACACCTGCCGGACCAGCCAGGGCTCCCCGGCTTTCCAGCCGCC
19	1220647	1220767	STK11	121	CGAGATTGCCAACGGCCTGGACACCTTCTCCGGCTTCAAGGTGGACATCTGGTCGGCTGGGGTCACCCTGTAAGTGCCCCGCCCCCCCGGGCACTCACCACACGCACACTCCGAGGGGCC
19	1221155	1221275	STK11	121	TAGGGCGTCAACCACCTTGACTGACCACGCCTTTCTTCCCTCCCCTCGAAATGAAGCTACAACATCACCACGGGTCTGTACCCCTTCGAAGGGGACAACATCTACAAGTTGTTTGAGAAC
19	1221275	1221395	STK11	121	ATCGGGAAGGGGAGCTACGCCATCCCGGGCGACTGTGGCCCCCCGCTCTCTGACCTGCTGAAAGGTGGGAGCCTCATCCCTCTGCCCGCAGCCCCAGGGAGGCGGGGCTTTTGTGCAGAA
19	1221916	1222036	STK11	121	GCTGACAGGCTCCTCGCCGGCTTCTCCTCAGGGATGCTTGAGTACGAACCGGCCAAGAGGTTCTCCATCCGGCAGATCCGGCAGCACAGGTGAGCGGCCCCTGGGGGCAGTGGGGCCGAG
19	1222957	1223077	STK11	121	GCGCCACTGCTTCTGGGCGTTTGCAGCTGGTTCCGGAAGAAACATCCTCCGGCTGAAGCACCAGTGCCCATCCCACCGAGCCCAGACACCAAGGACCGGTGGCGCAGCATGACTGTGGTG
19	1223077	1223197	STK11	121	CCGTACTTGGAGGACCTGCACGGCGCGGACGAGGACGAGGACCTCTTCGACATCGAGGATGACATCATCTACACTCAGGACTTCACGGTGCCCGGTGAGTCTGGCGGGGGCCCCTGCCCG
19	1223607	1223727	STK11	121	CCCTGATGCCGGCCGCCCTTCTTCCCTAGGTGGCGAGGAGGCGTCTGAGGCAGGGCTTAGAGCGGAGCGCGGCTTGCAGAAGAGCGAGGGCTCAGACCTTTCAGGAGAGGAAGCCTCTCG
19	1223727	1223847	STK11	121	GCCGGCGCCGCAGTAGTGCCTGAGGAGGAGCTCAGGGCCTTAGCGTAGGGGCGGCCCACATTGGCAGCCAGCCCCTCCCCGCCATGCTCCCGGCTTGGCTGTGTTCGGCCCAGGGCTGGG
19	1223847	1223967	STK11	121	CCGTGTCATAAAGAGTTTTGCAGTGTATCTGCAGGGTGGATGCTTGCTGCGCTCGGGCTGGAGCCTGAGGGGGCTTTCTGCTTTACTGTTTCAGCGGGAAGTGGTGGGCAGGGGCCGGCC
19	1223967	1224087	STK11	121	TGAGAAGGGGGGTACGCCAGGCAGGTTGGGATGTGAGGACCCAGTGCACAGGGTCCACCCCCGGGCCCGAGGGTCCCAGAATAGTGGGGGCCCTGCAGAGAGCCCCCCATTAGGTCCCTC
19	1224087	1224207	STK11	121	AGCACTCCTGGGCCCCTCATCAAACCCCTAGGCTCAGCTCAGTAGCTGGTCCCCAGGAGAGTACAGTGTGGGGGCCCCCGAGAGCACAGTGTATGGGGGTCCCCGGGGGGTACAGTGTCT
19	1224207	1224327	STK11	121	GGGGGCCCCCCAGGAGGATGCAGCATGTGGGGGCCCCCCAGGAGGGTACAGCGTGTGTGGGGCCCCCAGGATCACAGGGTCTCAGCTCCTGGGCTCTTGGATTTGCAGCACCACGACCAT
19	1224327	1224447	STK11	121	CGCGTCTGGTCTGTTGGAACGGGAGGTGCTGCTGGGTACCCTGGTCACTAGGGTGTGCTGGGAGGTGGGGGCCCCTCATGGTGCCCATCCTTGGGGCCTGGCTGCAATTTGACCCCAGGC
19	1224447	1224567	STK11	121	CCAGGGTCTTCTGCCTTTCAGAGCCCTGGTGCCCTGAGACGGGCAGCCAGGCAAATCCCAGGCAGGAGGGCCAGTTAGGGCAGGGCCAGCCCAGGCAGGTTGCGAGAGTCCCTACTGGGA
19	1224567	1224687	STK11	121	CGTGGACCACACGCTGACCCCCACGGCCGCCCCTGCAGGCCAGGATCCCTGAGCCAGGACCCGGCACTGGCTTCCCTCCTGGGGACCCTCAGGCCTGTGTGAGACCTGGGCTGCCCTGGG
19	1224687	1224807	STK11	121	GTGAGGTGCCTGGGAGGAGAGCAGGGGCTGGGCCACCTTTTTCATGACCCTGCTAAGCCCACTGTGGGTGGTGAGGAGGAGTACCCAGCAGGGGGAAGGGCCGCCAGACCACTCGGCATG
19	1224807	1224927	STK11	121	GCTGAGGCCTCAGTACTCAGTACTGGGTACTCAGGTGGACGCCCCTCCCACTGCTCAGATGCTGGGGACAGGCTCAACTTCAGGCTTCAGCGTGAGCCCCGTCCCTGACCTGCAGAGCCC
19	1224927	1225047	STK11	121	CCTTGCGTTGGGGCAGGACAGCCCGGCGCCCTCGGGTCAGGCCATCCTCTGCGCTCTGCCGGGGCTGCTGCATCGGCCTCTGCGTGCCTCCACTTTGGCCTCACGTGTCCCTACCCAGGA
19	1225047	1225167	STK11	121	TGCGGGTCCTGCTGCCAACACCCAGATCCCAGGGAAGGGGCTTGGGCTAGATCCTGGGCACCAGTGCAGACAGGAGTGTGGGGTGGGGCAAGGGCCCAGTGGCGGCTGTGCCCGCTGATG
19	1225167	1225286	STK11	120	CAGAGCTGGGGCACCTTGTCCACAGGGTCTGCCCCACCAGAGACGGGCTGGGCCCAAGCTCAGACCTATGGGTGCAATTGGTGCCTCCTCACCAAGGtcttttttatcttttttttttt
19	1225547	1225667	STK11	121	gtgagccaccgcgaccggccCAAGGTGCTTTTTTAAAGCTAGTGACTTCCTGTGCACATGGGGTGGGTGTGTGGCAAGTTCTGGAAGCTGCTGAGTCAGCCACTGGTCCATTCTCGGAGC
19	1225667	1225787	STK11	121	TGGGGCTCTGCACTGGGCACATGAGCTCTGGGGCAGCCCGGGGCGGCCTCCCACTGACTTCGCCCGGGAGGGGCCTCGGGGATGGCTCGGCAGCCAGTGTGTTCGCGGAGTCCTCGCCAA
19	1225787	1225907	STK11	121	CCACCACGGCTCCTCGCAGGGACAGTACGTGGGCAGCTTCCTGCACTTTCCCCTGCCATTGTGAGAACAGTGTCCACCTGGGCAGGGTGGGCAGCCCCAGGCCTGTGGGTTTCACCAGGG
19	1225907	1226027	STK11	121	TGCTGGTGATGGTTGGTGGCTAGCAGGGACTGGGGGCAGCTGGGGGCCCTGGCAGGCTGAGCTCTGCTCCCCGCGTGGTTCTGTGCTGGCATTTCGCGTgcctggcctgagcctggcccg
19	1226027	1226147	STK11	121	agcctggcccTCCTGTGTCCTCACAGATGAGCATGTGGCGGCTCCTGGGCCTCTAGAACCAACCATGGGCCAGGGTGCCCCAGGGGAGCACGGGAGGGTCCTGCCTTGTCAGCTTGCCTC
19	1226147	1226267	STK11	121	CTACTCGTGAGGTTCCTGCAGTCAGTACCTGGGTGGGGTCCCACCTGCGGCCATGGCAGGTGCAACAGACGTGGTGGAGGGGACACTCCTGCCCAGGCCATCTGCGGGAGGCTCAGCCCC
19	1226267	1226387	STK11	121	GGGGGGTGCCTCCCAGAGCTGCTGGGGGGCAGCATTTCAGGCTGGATACACCTGGGCCTGACCCGGGGGCGGGCATGGCCTGGGCAGCAGCTGTAAGTGCGTCCCCGTGGTGGGGGCCAG
19	1226387	1226507	STK11	121	CCAGGTCCCTGTGGCTCTGGGGTTGCGCCCCTCAGCTCAGGCCACACTTGCCGTCTCCCTCCCAGGACAGGTCCCAGAAGAGGAGGCCAGTCACAATGGACAGCGCCGGGGCCTCCCCAA
19	1226437	1226557	STK11	121	CCGTCTCCCTCCCAGGACAGGTCCCAGAAGAGGAGGCCAGTCACAATGGACAGCGCCGGGGCCTCCCCAAGGCCGTGTGTATGAACGGCACAGAGGCGGCGCAGCTGAGCACCAAATCCA
19	1226557	1226677	STK11	121	GGGCGGAGGGCCGGGCCCCCAACCCTGCCCGCAAGGCCTGCTCCGCCAGCAGCAAGATCCGCCGGCTGTCGGCCTGCAAGCAGCAGTGAGGCTGGCCGCCTGCAGGTGGGGCGCGGCGGG
19	1227536	1227656	STK11	121	GAGGCGGAGAACCGGTGCCCAGGCTGACCTCTTCCGTCTTCCTTCCACCCTGCAGCCCGTGTCCAGGAGCCCCGCCAGGTGCCCGCGCCAGGCCCTCAGTCTTCCTGCCGGTTCCGCCCG
19	1227656	1227776	STK11	121	CCCTCCCGGAGAGGTGGCCGCCATGCTTCTGTGCCGACCACGCCCCAGGACCTCCGGAGCGCCCTGCAGGGCCGGGCAGGGGGACAGCAGGGACCGGGCGCAGCCCTCCCCCCTCGGCCG
19	1227776	1227896	STK11	121	CCCGGCAGTGCACGCGGCTTGTTGACTTCGCAGCCCCGGGCGGAGCCTTCCCGGGCGGGCGTGGGAGGAGGGAGGCGGCCTCCATGCACTTTATGTGGAGACTACTGGCCCCGCCCGTGG
19	1227896	1228016	STK11	121	CCTCGTGCTCCGCAGGGCGCCCAGCGCCGTCCGGCGGCCCCGCCGCAGACCAGCTGGCGGGTGTGGAGACCAGGCTCCTGACCCCGCCATGCATGCAGCGCCACCTGGAAGCCGCGCGGC
19	1228016	1228136	STK11	121	CGCTTTGGTTTTTTGTTTGGTTGGTTCCATTTTCTTTTTTTCTTTTTTTTTTTAAGAAAAAATAAAAGGTGGATTTGAGCTGTGGCTGTGAGGGGTGTTTGGGAGCTGCTGGGTGGCAGG
19	3118882	3118986	GNA11	105	GGCGCCAGGTGGCTGAGTCCTGGCGCTGTGTCCTTTCAGGATGGTGGATGTGGGGGGCCAGCGGTCGGAGCGGAGGAAGTGGATCCACTGCTTTGAGAACGTGA
19	3118986	3119002	GNA11	17	CATCCATCATGTTTCT
19	10597290	10597410	KEAP1	121	CATTGGACTGTATTTTTGCCCAAGAAACAAAAGTGCCTCAACAGGTACAGTTCTGCTGGTCAATCTGCTTCCGGCAGGGCTCCATGGTGACAGCCACGCCCACCCCACTCCGGCCCGATG
19	10597410	10597530	KEAP1	121	TCATTCGGGTCACCTCGCTCCAGGTGTCTGTATCTGGGTCGTAACACTCCACACTGTCCAGGAACGTGTGACCATCATAGCCTCCTGCGGGAAGAACAGAAGGGATGGTCACCACCTGTC
19	10599836	10599956	KEAP1	121	TCAGGACTCTTCCCCGCCCCCAGGGCCTCACCAAGGACGTAGATTCTCCCCTGGTGGACAGTGATCCCCAGGGCACTTCGCCGGTGCTTCATGGGGGCTACGAAAGTCCACGTCTCTGTT
19	10599956	10600076	KEAP1	121	TCCACATCGTAGCGCTCCACGCTGTTCAGCTGGTCCTGACCATCATAGCCCCCAGCAGCATAGATACAGTTGTGCAGGACGCAGACGCCTAAAGGGCACCATGCAGAGAAGGTGACTCTG
19	10600306	10600426	KEAP1	121	CTACCGTCCCCACCCACCTGCCCCGCTTCGGATGGTGTTCATTGCTGTGATCATTCGCCACTCGTTCCTCTCTGGGTAGTAACACTCAGCTGAATTAAGGCGGTTTGTCCCGTCAAAGCC
19	10600426	10600546	KEAP1	121	CCCCACGGCATAAAGGAGACGATTGAGGACAGCCACGCCCACCCCGATCCTTCGTGTCAGCATTGGGGCCACCAAGTGCCACTCATCCCGCTCTGGCTCATACCTGCAAGGGCGTAAGAA
19	10602235	10602355	KEAP1	121	CAGGCCCTGCCACTCACCTCTCCACACTGTTGTGGTGGATGCAGCCGTGGGAGCCGCCGACGGCATAGATGTGGCCATCGATGACCCCCACCCCGATGCGGTTACGGGGCACGCTCATGG
19	10602355	10602475	KEAP1	121	GGGCGCAGGGCGACCACTGATTGGTCATGGGGTTGTAACAGTCCAGGGCGCTGGAGTCGGTGTTGCCGTCGGGCGAGTTGTTCCTGCCGCCCACGGCGTACAACAGCCCGCCCACCACGC
19	10602475	10602595	KEAP1	121	AGCCGGCCAGGCCGCTCCGCGGCACCTGCAGGTCCGCCAACCGGAGCCAGGTGCCGTCACTGGGGTTGTAAGCCTCCAGGTAGCTGAGCGACTGTCGGAAGTAGCCGCCCGCGGTGTAGA
19	10602595	10602715	KEAP1	121	TCAGGCGGCCCACCTTGGGCGCCCGGCAGGGCATCACCTGCGTGGGCTTGTGCAGGGTGAGCTCCTCGAAGATCTTGACCAGGTAGTCCTTGCAGCGGGAGTCGGACTGCAGGATCTCGC
19	10602715	10602835	KEAP1	121	ACTTCTGCAGCTGCATCTGCAGGAAGTTCGGCGTCAACGAGTGGCAGCGCACGGCCCGCAGCAGCGCCTGGACGTAGAACCGTCGCTGTTCGCAGTCGTACTTGACCCAGTTGATGCAGG
19	10602835	10602955	KEAP1	121	CGTGGAAGACCTCGGACTCGCAGCGCACGTTCAGGTCGTCCCGGCTGATGAGGGTCACCAGTTGGCAGTGGGACAGGTTGAAGAACTCCTCTTGCTTGGCCACCTGCAGAGGGCGACAGT
19	10610029	10610149	KEAP1	121	CCTTCTCCTGACACTGCCCCCAGCCCCACTTCCCCGCTCACCTCCCCAAAATGCATGTAGATGTACTCCCGGGCACGCTGGTGCAACTCCACACAGCCAATCTGCTCAGCGAAGTTGGCG
19	10610149	10610269	KEAP1	121	ATGCCGATGGCATTGCTGGGGTCCAGCTGCTGCACCAGGAAGTCACTGCAGGCACGGACAACGCTGTCGATCTGGTACATGACAGCACCGTTCATGACGTGGAGGACACACTTCTCGCCC
19	10610269	10610389	KEAP1	121	ATGGAGATGGAGGCCGTGTAGGCGAATTCAATGAGGCGCTCCATGACCTTGGGGTGGATACCCTCAATGGACACCACCTCCATGCCCTGCTCCCGCAGCCCGTTGGTGAACATGGCCTTG
19	10610389	10610509	KEAP1	121	AAGACAGGGCTGGATGAGGCCAGCACCACCTTGTGGGCCATGAACTGGGCGGCCGGTGCATCCTGGTACTTGACCTGCAGTGTGACGTCACACAGCTGCTGGCTGAGCCGCAGCTCGTTC
19	10610509	10610629	KEAP1	121	ATGATGCCAAAGGCCTGCTTGGTATGATCCTCCAGGGTGTAGCTGAAGGTGCGGTTGCCATGCTGGGAGGGCGTCACCTCCGCCTTGCACTCAGTGGAGGCGTACATCACCGCGTCCCCT
19	10610629	10610749	KEAP1	121	GCCCCCTCAGGGCACTGTGACTGCAGGGGCAGGAATCGGCAGCAGGCCCCAGCCCCGCTAGGCCTGGGATCTGGCTGCATGGGGTTCCAGAAGATAAGCAACACCACCACCTCTGGCACT
20	36031702	36031797	SRC	96	CCTTCGAGTACCTGCAGGCCTTCCTGGAGGACTACTTCACGTCCACCGAGCCCCAGTACCAGCCCGGGGAGAACCTCTAGGCACAGGCGGGCCCA
21	44513144	44513264	U2AF1	121	CTTATGAACTGGTTTGGTCAATCAACTACAACACTTTCTAGCAGACATAAGGTAAAAATGGCATGGCTCAGAATCGCCCAGATCTTTCACGATCTCTCGACCGCCTCCTGTCACGCTCCC
21	44513280	44513399	U2AF1	120	accaccgccaccgccaccgccacgaccacGGTCTCTAGACCGAGAACGACGCTCCCGGGATCGGGATCTTGATCTATGCCTGCAACCAAGGAAAATAAAGAAAACCGTGCCATCCAAAC
21	44514567	44514687	U2AF1	121	CAGGAATACTCACTTCTTGCGACGGCGGCCATACAGCTCCCGCCGCAGCTCTCTGGAAATGGGCTTCAAATGCATGAAGTTGCAGAAGCCGCCTCGTGTGCATTCTCTGTGGGTGGGTTG
21	44514711	44514831	U2AF1	121	TGCACACGGCCCCGAACTGTGCTCAGTCACGTCACTGGCCACTCCTCACTCACCCCATCTCATACTGACGGCAGCAGGCTTCTCTGAAGTCCGTCACGGGTGACAGCTCGGCGTGGATCG
21	44514831	44514951	U2AF1	121	GCTGTCCATTAAACCAACGGTTATTCAAGTCAATCACAGCCTTTTCCGCATCTTCCTCACGGCGAAACTGAAAAGACAAAAACAGAAGTGCTTGCCATCCACGCTTTAATAAGACTTTCT
[truncated: 34 more rows]

## Sheet: Table S3
sampleID	Plasma sample ID	Sex	age	Plasma volume (mL)	Plasma DNA concentration (ng/mL)	Family History	Smoking History	Pathological Diagnosis	TNM	Stage	Tumor Size (cm)	Largest Dimension（cm）	ctDNA	Mutant allele frequency (%)	FFPE	Mutant allele frequency (%)
YH001	1010020003	Male	47	30	2.68	No	Smoking for 27 years, 1.5 packs/d	TB			2×1.5×1.5	2	N		N
YH002	12150046	Female	65	30	0.652	No	No	Secondary lung changes			0.4	0.4	N		N
YH003	1010030008	Male	37	30	0.602	No	No	TB			6×4×3	6	N		N
YH004	1010030016	Male	52	30	1.49	No	No	Fibroplasia			3.5×3×2	3.5	N		N
YH005	7200411	Female	34	30	0.49	No	No	Sclerosing hemangioma			3.6×2.7×1.6	3.6	N		N
YH006	7110403	Male	49	30	0.308	No	No	Pulmonary granulomatous inflammation			4×2×1.5	4	N		N
YH007	9150541	Male	52	30	1.22	No	No	Organized pneumonia			1.1×0.8×0.5	1.1	N		N
YH008	11300018	Male	63	30	3.74	No	Smoking for >50 years, 10 sticks/d	Organized pneumonia			1.6×1.1	1.6	N		N
YH009	80802037	Male	48	30	0.996	No	No	Pulmonary inflammatory myofibroblastic tumor			4×3×2.2	4	N		N
YH010	80802025	Male	38	30	0.448	No	Smoking for 20 years, 40-60 sticks/d	TB			3×2.5×1.5	3	N		N
YH011	9220566	Male	54	30	0.556	No	No	Diseased			4×3×2	4	N		N
YH012	9300595	Female	34	30	0.362	No	No	TB			2.3×1.3×0.7	2.3	N		N
YH013	80802045	Female	54	30	1.33	No	No	Pulmonary aspergillosis			1.5×1.2×1	1.5	N		N
YH014	80802041	Male	44	30	0.86	No	No	Fibroplasia			7×5×2.5	7	N		N
YH015	3240223	Female	60	30	0.294	No	No	Lung infection			0.7	0.7	N		N
YH016	80802013	Female	50	30	0.566	No	No	Fibrosis			2.5×1.3×1	2.5	PDGFRB c.1922G>A p.R641H	0.00294118	N
YH016	80802013	Female	50	30	0.566	No	No	Fibrosis			2.5×1.3×1	2.5	STK11 c.996G>A p.W332*	0.002849	N
YH016	80802013	Female	50	30	0.566	No	No	Fibrosis			2.5×1.3×1	2.5	PTEN c.733C>T p.Q245*	0.00261324	N
YH017	1010020009	Female	38	30	0.606	No	No	TB			2.2×1.8×1	2.2	KMT2C c.947C>G p.T316S	0.00245499	N
YH018	1010030035	Female	64	30	2.12	No	No	Inflammation			2.5×2×2	2.5	N		N
YH019	1010030031	Male	40	30	1.15	No	Smoking for 20 years, 20 sticks/d	Fibroplasia			3×2×2	3	N		N
YH020	80802047	Male	47	30	0.556	No	No	Hamartoma			1×0.8×0.6	1	N		N
YH021	11280010	Male	35	30	0.682	No	No	Pleural schwannoma			3.5×2×1.4	3.5	N		N
YH022	9300587	Female	26	30	0.416	No	No	TB			1.2×1×1	1.2	N		N
YH023	12130038	Female	48	30	0.866	No	No	TB			1.5	1.5	N		N
YH024	93006	Female	38	30	0.55	No	No	TB			1.1	1.1	N		N
YH025	93013	Female	53	30	0.43	No	No	Pulmonary fungal disease			0.8×0.6	0.8	N		N
YH026	1130080	Male	52	30	0.438	Father diagnosed lung cancer 10 years ago but still alive	Smoking for 20 years, 20 sticks/d	Pneumonia granuloma			4×2.3×2	4	N		N
YH027	2160178	Male	45	40	0.466	No	Smoking for 20 years, 1-10 sticks/d	Castleman Disease			4.5×3.3×3	4.5	N		N
YH028	2270185	Male	71	40	0.596	No	Smoking for 43 years, 1 pack/d	Lung Hamartoma			3.5×3×1.3	3.5	N		N
YH029	3100203	Male	33	40	0.414	No	No	Pulmonary cyst			3×1.5×1.2	3	N		N
YH030	3200217	Female	43	40	0.218	No	No	Sclerosing hemangioma			0.6	0.6	N		N
YH031	3220219	Female	44	30	0.348	No	No	Inflammation			2×1×1	2	N		N
YH032	3280226	Male	40	40	0.36	No	Cessed smoking for 1 year; smoked for >10 years prior, 1-2 sticks/d	Multiple benign nodules			0.5	0.5	N		N
YH033	4010229	Female	48	40	0.468	No	No	Hamartoma			0.8×0.6×0.6	0.8	N		N
YH034	4010230	Male	49	40	0.68	No	Smoked for >30 years, 0.5 pack/d	Benign nodule			1.0×1.0	1	N		EGFR c.2497T>G p.L833V	0.0162714
YH035	4010231	Male	73	40	0.782	No	No	pulmonary nodule			0.5	0.5	N		N
YH036	4060233	Female	64	30	0.61	No	No	Inflammatoary nodule			1.4×1	1.4	N		N
YH037	4060234	Female	44	40	1.17	No	No	Inflammatoary nodule			0.7×0.7	0.7	N		N
YH038	5050241	Male	63	30	0.558	No	Cessed to smoke for >10 years; smoked heavily previsouly	TB			2.8×1.2×0.8	2.8	N		N
YH039	5200266	Female	53	30	0.774	No	No	Lung organized pneumonia			3.5×2.5×3	3.5	N		N
YH040	5230270	Male	54	30	1.53	No	Smoking for >30 years, 10 sticks/d	Pulmonary necrotizing granuloma			0.6	0.6	N		N
YH041	5310282	Male	71	30	0.972	No	Smoking for 30 years, 5 sticks/d	lung organized pneumonia			5.5×2.6×4	5.5	N		N
YH042	6030290	Female	46	30	0.45	No	No	Pulmonary necrotizing granuloma			1	1	N		EGFR c.2497T>G p.L833V	0.0131687
YH042	6030290	Female	46	30	0.45	No	No	Pulmonary necrotizing granuloma			1	1	N		LRP1B c.12802C>A p.L4268I	0.0118243
YH043	6150319	Male	60	30	0.68	No	No	pulmonary nodules			1.6×1.3×0.6	1.6	N		N
YH044	6150320	Male	59	40	0.724	Father and sisteer died of lung cancer	Smoking for 40 years, 3 pack/d	calcified nodules			0.4	0.4	N		N
YH045	6180331	Female	32	30	0.996	No	No	lung innfection			1.2	1.2	N		N
YH046	6220354	Male	44	40	0.286	No	No	Pulmonary granulomatous inflammation			0.9	0.9	N		N
YH047	6260361	Female	39	30	0.476	No	No	inflammation			5×3×3	5	N		EGFR c.2497T>G p.L833V	0.0103616
YH048	6280367	Female	65	30	2.48	No	No	Lung abscess			5.2×5.5×3.7	5.5	N		N
YH049	7200413	Female	73	30	0.556	No	Smoking for 40 years, 1 pack/d	Pulmonary nodules			2.5×1.2×1.6	2.5	N		N
YH050	11230005	Male	39	30	0.784	HCC of grand father	Smoking for 15 years, 20 sticks/d	Inflammation			0.6×0.4/0.4×0.3	0.6	N		N
YH051	12020023	Male	45	40	0.296	No	Smoking for >20 years, 20 sticks/d	Lung atypical hyperplasia-like nodules			0.2×0.3	0.3	N		N
YH052	12090029	Female	55	30	0.59	No	No	TB			3	3	N		N
YH053	12150045	Female	73	30	1.77	No	No	Inflammation			4×3	4	N		N
YH054	12190047	Male	45	30	1.43	No	Smoking for 30 years, >20 sticks/d	Necrotizing granulomatous inflammation			2.3×2.3×2.1	2.3	N		N
YH055	12210060	Male	69	30	0.742	Lung cancer of sister	Smoking for >30 years, 40 sticks/d	TB			1.5×1×1	1.5	N		N
YH056	12210061	Male	44	30	0.602	No	No	TB			1.6	1.6	N		N
YH057	6080307	Female	61	30	0.488	No	No	Lung adenocarcinoma	T1N0M0	I	1.6×1×0.8	1.6	APC c.3916G>T p.E1306*	0.00310559	EGFR c.2236_2250del15 p.E746_A750delELREA	0.0640749
YH057	6080307	Female	61	30	0.488	No	No	Lung adenocarcinoma	T1N0M0	I	1.6×1×0.8	1.6	PIK3CA c.403G>A p.Glu135Lys	0.00310078	N
YH058	8040453	Female	58	30	0.954	Esophageal cancer of mother, billary duct cancer of father	No	Lung adenocarcinoma	T1N0M0	IA	1.0×0.8×0.5	1	N		EGFR c.2236_2250delGAATTAAGAGAAGCA p.Glu746_Ala750del	0.0561133
YH058	8040453	Female	58	30	0.954	Esophageal cancer of mother, billary duct cancer of father	No	Lung adenocarcinoma	T1N0M0	IA	1.0×0.8×0.5	1	ERBB4 c.884-20T>C .	0.0198903	ERBB4 c.884-20T>C .	0.0146379
YH059	5100247	Male	41	40	0.408	No	No	Lung adenocarcinoma	T1N0M0	IA	2.5	2.5	N		PTEN c.834C>A p.F278L	0.0326797
YH059	5100247	Male	41	40	0.408	No	No	Lung adenocarcinoma	T1N0M0	IA	2.5	2.5	N		RB1 c.1072C>T p.R358*	0.0101902
YH060	1110076	Male	56	30	1.09	No	No	Lung adenocarcinoma	T1aN0M0	IA1	1×0.8×0.6	1	EGFR c.2515G>A p.A839T	0.00142349	EGFR c.2573T>G p.L858R	0.0426548
YH061	80802009	Female	40	30	0.722	No	No	Lung adenocarcinoma	T1aN0M0	IA1	1.2×0.7×1	1.2	N		N
YH062	5240274	Male	35	30	0.812	No	No	Pulmonary adenocarcinoma	T1aN0MO	IA1	0.5	0.5	N		EGFR c.2497T>G p.L833V	0.0113208
YH063	12210059	Male	58	30	0.562	No	Smoking for >30 years, 20-30 sticks/d	Lung adenocarcinoma	T1aN0MO	IA1	0.6×0.7	0.7	N		N
YH064	1030073	Male	60	30	0.842	No	Smoking for 40 years, 20 sticks/d	Pulmonary carcinoid	T1aN0MO	IA1	1.3	1.3	TP53 c.574C>T p.Q192*	0.00238854	SMAD4 c.322G>T p.E108*	0.020751
YH064	1030073	Male	60	30	0.842	No	Smoking for 40 years, 20 sticks/d	Pulmonary carcinoid	T1aN0MO	IA1	1.3	1.3	TP53 c.743G>A p.R248Q	0.00197628	N
YH065	1010030011	Female	60	30	1.2	No	No	Lung adenocarcinoma	T1aN0M0	IA1	1×0.9×0.3	1	N		N
YH066	1010030017	Female	61	30	0.39	No	No	Carcinoma in situ, partially differentiated adenocarcinoma	T1aN0M0	IA1	0.9×0.7×0.5	0.9	N		KMT2C c.7443-6T>A .	0.206945
YH067	1010020008	Male	65	30	0.858	No	Cessed smoking but used to smoke 2-3 pcks/d for 20 year	Lung adenocarcinoma	T1bN0M0	IA2	1.5×1.5×1.3	1.5	GNAQ c.286A>T p.T96S	0.0300033	KMT2C p.W858L c.2573G>T	0.112539
YH067	1010020008	Male	65	30	0.858	No	Cessed smoking but used to smoke 2-3 pcks/d for 20 year	Lung adenocarcinoma	T1bN0M0	IA2	1.5×1.5×1.3	1.5	GNAQ c.303C>A p.Y101*	0.0269599	N
YH068	1010030046	Female	48	30	0.818	No	No	Lung adenocarcinoma	T1bN0M0	IA2	1.5×1.5×1.2	1.5	N		TP53 c.993+1G>T .	0.204997
YH069	5240273	Male	47	30	0.976	Breast cancer of mother	Cecssed smoking for 2 years, used to smoke 2-3 packs/d for >30 years	Lung adenocarcinoma	T1bN0M0	IA2	1.8×1.4	1.8	SMAD4 c.1333C>T p.R445*	0.00391645	MET c.2942_3082del141 p.L982_D1028del	0.0586841
YH070	6190336	Female	50	30	0.87	No	No	Lung adenocarcinoma	T1bN0M0	IA2	1.5	1.5	N		EGFR c.2497T>G p.L833V	0.0736989
YH071	7110404	Female	77	30	0.73	No	No	Lung adenocarcinoma	T1bN0M0	IA2	2	2	EGFR c.2543C>T p.P848L	0.00366838	N
YH072	3070201	Male	59	30	1.6	No	Cessed smoking for a month, used to smoke 10 sticks/d for 40 years	Lung adenocarcinoma	T1bN0M0	IA2	2	2	NF1 c.3827G>A p.R1276Q	0.00110988	EGFR c.2497T>G p.L833V	0.245461
YH072	3070201	Male	59	30	1.6	No	Cessed smoking for a month, used to smoke 10 sticks/d for 40 years	Lung adenocarcinoma	T1bN0M0	IA2	2	2	EGFR Ile789Leu		TP53 c.814G>A p.V272M	0.290877
YH073	6210349	Male	55	30	0.734	No	Smoking for >40 years, 1 pack/d	Lung carcinoid	T1bN0M0	IA2	2×1.2	2	N		N
YH074	80802017	Male	58	30	0.428	No	No	Lung adenocarcinoma	T1bN0M0	IA2	1.5×1×1	1.5	N		EGFR c.2497T>G p.L833V L858R	0.0806721
YH075	80802035	Male	45	30	0.432	CRC of uncle	Cessed to smoke for 2 weeks, used to smoke 20 sticks/d for >20 years	Lung adenocarcinoma	T1bN0M0	IA2	2×1.5×0.6	2	N		BRAF c.1799T>A p.V600E	0.0528058
YH075	80802035	Male	45	30	0.432	CRC of uncle	Cessed to smoke for 2 weeks, used to smoke 20 sticks/d for >20 years	Lung adenocarcinoma	T1bN0M0	IA2	2×1.5×0.6	2	N		CTNNB1 c.110C>G p.S37C	0.0502209
YH076	80802019	Female	63	30	0.446	No	No	Lung adenocarcinoma	T1bN0M0	IA2	1×1.5×1	1.5	LRP1B c.4306G>A p.E1436K	0.00497512	EGFR c.2300_2308dupCCAGCGTGG p.Ala767_Val769dup	0.111533
YH076	80802019	Female	63	30	0.446	No	No	Lung adenocarcinoma	T1bN0M0	IA2	1×1.5×1	1.5	N		SMAD4 c.1081C>T p.R361C	0.0337031
YH076	80802019	Female	63	30	0.446	No	No	Lung adenocarcinoma	T1bN0M0	IA2	1×1.5×1	1.5	N		CTNNB1 c.110C>G p.S37C	0.0265039
YH077	80802049	Female	62	30	1.04	No	No	Lung adenocarcinoma	T1bN0M0	IA2	1.5×1.3×1	1.5	TP53 c.774A>T p.E258D	0.00192308	EGFR c.2573T>G p.L858R	0.144122
YH078	80802057	Female	67	30	5.28	Lung cancer of father	No	Lung adenocarcinoma	T1bN0M0	IA2	1.5×1×1	1.5	N		N
YH079	93005	Female	50	30	0.756	No	No	Lung adenocarcinoma	T1bN0M0	IA2	1.2	1.2	ALK c.4574A>C p.Lys1525Thr	0.00181488	ALK c.4574A>C p.Lys1525Thr	0.0122363
YH079	93005	Female	50	30	0.756	No	No	Lung adenocarcinoma	T1bN0M0	IA2	1.2	1.2	NF1 c.3721C>T p.R1241*	0.00270416	PTEN c.802-2A>T .	0.0190972
YH079	93005	Female	50	30	0.756	No	No	Lung adenocarcinoma	T1bN0M0	IA2	1.2	1.2	ATM c.1009C>T p.R337C	0.00226244	N
YH079	93005	Female	50	30	0.756	No	No	Lung adenocarcinoma	T1bN0M0	IA2	1.2	1.2	TP53 c.1024C>T p.R342*	0.00146306	N
YH079	93005	Female	50	30	0.756	No	No	Lung adenocarcinoma	T1bN0M0	IA2	1.2	1.2	TP53 c.844C>T p.R282W	0.00132861	N
YH080	2230181	Female	61	30	1.09	No	No	Lung adenocarcinoma	T1bN0M0	IA2	1.3	1.3	STK11 c.275A>G p.Glu92Gly	0.00235294	EGFR c.2573T>G p.L858R	0.136884
YH080	2230181	Female	61	30	1.09	No	No	Lung adenocarcinoma	T1bN0M0	IA2	1.3	1.3	RYR2 c.11092-11T>A .	0.00266075	TP53 c.817C>T p.R273C	0.223547
YH080	2230181	Female	61	30	1.09	No	No	Lung adenocarcinoma	T1bN0M0	IA2	1.3	1.3	MET c.6G>T p.K2N	0.0015	RYR2 c.11092-11T>A .	0.0143627
YH081	080802073-2074	Male	65	30	2.12	No	No	Lung adenocarcinoma	T1bN0M0	IA2	2×2×0.4	2	N		EGFR c.2156G>C p.G719A	0.334282
YH081	080802073-2074	Male	65	30	2.12	No	No	Lung adenocarcinoma	T1bN0M0	IA2	2×2×0.4	2	N		EGFR c.2303G>T p.S768I	0.324828
YH082	10170609a	Male	59	30	0.842	No	No	Lung adenocarcinoma	T1bN0M0	IA2	2×1.8×1.2	2	TP53 c.224delC p.P75fs*48	0.00388727	MET c.2224C>G p.P742A	0.0349
YH082	10170609a	Male	59	30	0.842	No	No	Lung adenocarcinoma	T1bN0M0	IA2	2×1.8×1.2	2	N		KRAS c.34G>T p.G12C	0.0235
YH083	09220568a	Female	50	30	0.708	No	No	Lung adenocarcinoma	T1bN0M0	IA2	1.2×1×0.5	1.2	RB1 c.751C>T p.R251*	0.0027	EGFR c.2127_2129delAAC p.E709_T710>D	0.0552424
YH083	09220568a	Female	50	30	0.708	No	No	Lung adenocarcinoma	T1bN0M0	IA2	1.2×1×0.5	1.2	N		TP53 c.1024C>T p.R342*	0.123707
YH084	09150544a	Female	58	30	0.738	No	No	Lung adenocarcinoma	T1bN0M0	IA2	2×1.5×1	2	N		TP53 c.376-2A>T .	0.0617138
YH084	09150544a	Female	58	30	0.738	No	No	Lung adenocarcinoma	T1bN0M0	IA2	2×1.5×1	2	N		EGFR c.2573T>G p.L858R	0.123707
YH085	80802079	Male	66	30	1.06	No	Smoking for >40 years, 20 sticks/d	Lung adenocarcinoma	T1bN0M0	IA2	2×1.5×1.8	2	N		EGFR c.2300_2308dupCCAGCGTGG p.Ala767_Val769dup	0.0760586
YH085	80802079	Male	66	30	1.06	No	Smoking for >40 years, 20 sticks/d	Lung adenocarcinoma	T1bN0M0	IA2	2×1.5×1.8	2	N		TP53 c.394A>T p.K132*	0.121602
YH086	09150538a	Male	63	30	0.584	No	Cessed to smoke for >20 years, used to smoke 10 sticks/d for >20 years	SCLC	T1bN0M0	IA2	1.5×1.8×1.5	1.8	TP53 c.796G>T p.G266*	0.00674764	TP53 c.796G>T p.G266*	0.532435
YH086	09150538a	Male	63	30	0.584	No	Cessed to smoke for >20 years, used to smoke 10 sticks/d for >20 years	SCLC	T1bN0M0	IA2	1.5×1.8×1.5	1.8	TP53 c.743G>A p.R248Q	0.00367309	N
YH086	09150538a	Male	63	30	0.584	No	Cessed to smoke for >20 years, used to smoke 10 sticks/d for >20 years	SCLC	T1bN0M0	IA2	1.5×1.8×1.5	1.8	APC c.4385_4386delAG p.S1465fs*3	0.00974659	N
YH087	80802053	Male	64	30	0.792	No	Smoking for >30 years, 20-40 sticks/d	Lung adenocarcinoma	T1bN0M0	IA2	1.3×1.1×1.1	1.3	N		KRAS c.35G>A p.G12D	0.0617135
YH087	80802053	Male	64	30	0.792	No	Smoking for >30 years, 20-40 sticks/d	Lung adenocarcinoma	T1bN0M0	IA2	1.3×1.1×1.1	1.3	N		TP53 c.298C>T p.Q100*	0.0442032
YH087	80802053	Male	64	30	0.792	No	Smoking for >30 years, 20-40 sticks/d	Lung adenocarcinoma	T1bN0M0	IA2	1.3×1.1×1.1	1.3	N		EGFR c.2497T>G p.L833V	0.0120403
YH088	09150540a	Male	63	30	1.19	No	No	Pulmonary adenocarcinoma	T1bN0M0	IA2	1.5×1×1	1.5	ALK c.2110G>A p.A704T	0.0029	N
YH089	80802029	Female	64	30	0.67	No	No	Pulmonary mucinous adenocarcinoma	T1bN0M0	IA2	2×2×1	2	EGFR c.1723-37G>A .	0.0445236	KRAS c.35G>T p.G12V	0.0552554
YH090	09220567a	Female	34	30	0.85	No	No	Lung adenocarcinoma	T1bN0M0	IA2	1.5×0.5×0.5	1.5	SMARCA4 c.2855_2855delA p.K953fs*4	0.00767754	ROS1 c.5248+3430G>A .	0.0319149
YH090	09220567a	Female	34	30	0.85	No	No	Lung adenocarcinoma	T1bN0M0	IA2	1.5×0.5×0.5	1.5	NOTCH2 c.6223G>A p.V2075M	0.00214592	N
YH091	1010030024	Female	60	30	0.644	No	No	Lung adenocarcinoma	T1bN0M0	IA2	2×1.5×1.3	2	N		N
YH092	1010030022	Female	47	30	0.214	No	No	Lung adenocarcinoma	T1bN0M0	IA2	1.8×1.3×1.2	1.8	N		N
YH093	1010030042	Male	41	30	0.584	No	Cessed to smoke for 20 years, used to smoke 20 sticks/d for 10 years	Lung adenocarcinoma	T1bN0M0	IA2	1.3×1.3×0.8	1.3	N		N
YH094	1010030045	Male	53	30	0.39	No	Smoking for 30 years, 30 sticks/d	Lung adenocarcinoma	T1bN0M0	IA2	1.5×1.5×1.5	1.5	RET c.2000C>A p.P667Q	0.00158165	FBXW7 c.585-7_585-5delTTT .	0.0124046
YH094	1010030045	Male	53	30	0.39	No	Smoking for 30 years, 30 sticks/d	Lung adenocarcinoma	T1bN0M0	IA2	1.5×1.5×1.5	1.5	TP53 c.650T>A p.V217E	0.00194932	CDKN2A c.355G>T p.E119*	0.128595
YH094	1010030045	Male	53	30	0.39	No	Smoking for 30 years, 30 sticks/d	Lung adenocarcinoma	T1bN0M0	IA2	1.5×1.5×1.5	1.5	KMT2C c.947C>G p.T316S	0.00127011	N
YH095	1010030040	Male	70	30	0.828	No	No	Squamous cell carcinoma	T1bN0M0	IA2	1.2×1×0.8	1.2	KEAP1 c.811G>A p.V271M	0.00176835	EGFR c.1887T>A p.T629T	0.514693
YH095	1010030040	Male	70	30	0.828	No	No	Squamous cell carcinoma	T1bN0M0	IA2	1.2×1×0.8	1.2	N		MET c.1944A>G p.Q648Q	0.511676
YH096	1010030039	Male	52	30	0.814	No	Smoking for 30 years, 40 sticks/d	Lung adenocarcinoma	T1bN0M0	IA2	2×1.5×2	2	APC c.8141G>A p.R2714H	0.00147221	KRAS c.34G>T p.G12C	0.235368
YH096	1010030039	Male	52	30	0.814	No	Smoking for 30 years, 40 sticks/d	Lung adenocarcinoma	T1bN0M0	IA2	2×1.5×2	2	N		TP53 c.892G>T p.E298*	0.184389
YH097	3140206	Female	63	30	1.31	No	No	Lung adenocarcinoma	T1cN0M0	IA3	2.2×1.5	2.2	TP53 c.743G>A p.R248Q	0.0019544	EGFR c.2573T>G p.L858R	0.0286435
YH098	80802001	Male	59	30	2.2	No	No	Lung adenocarcinoma	T1cN0M0	IA3	2.5×2×1.5	2.5	N		EGFR c.2573T>G p.L858R	0.533406
YH099	80802015	Male	57	30	0.848	No	Cessed to smoke for 4 weeks, used to smoke 20 sticks/d for >30 years	Lung adenocarcinoma	T1cN0M0	IA3	3×3×2	3	FGFR3 c.*154T>C .	0.00957447	EGFR c.2235_2249del15 p.E746_A750delELREA	0.094717
YH100	09300593a	Female	53	30	1.22	Lung cancer of father	No	Lung adenocarcinoma	T1cN0M0	IA3	3×2×2	3	PTEN c.963delA p.T321fs*23	0.00615114	RYR2 c.5173T>C p.Y1725H	0.134451
YH101	09220575a	Male	59	30	0.396	No	No	Lung adenocarcinoma	T1cN0M0	IA3	3×2×2	3	N		KRAS c.34G>T p.G12C	0.201993
YH101	09220575a	Male	59	30	0.396	No	No	Lung adenocarcinoma	T1cN0M0	IA3	3×2×2	3	N		U2AF1 c.101C>T p.S34F	0.176386
YH101	09220575a	Male	59	30	0.396	No	No	Lung adenocarcinoma	T1cN0M0	IA3	3×2×2	3	N		RYR2 c.12400G>T p.G4134C	0.124696
YH101	09220575a	Male	59	30	0.396	No	No	Lung adenocarcinoma	T1cN0M0	IA3	3×2×2	3	N		CTNNB1 c.110C>T p.S37F	0.102372
YH102	5080245	Female	50	30	0.548	No	No	Lung adenocarcinoma	T1cN0M0	IA3	2.7×2.2×2	2.7	N		EGFR c.2573T>G p.L858R	0.173861
YH103	09220562a	Male	69	30	2.38	No	Smoking for >30 years, 20 sticks/d	Squamous cell carcinoma	T1cN0M0	IA3	2.5×2.5×2	2.5	TP53 c.858A>T p.E286D	0.0066422	TP53 c.517G>T p.V173L	0.164217
YH104	80802055	Male	54	30	0.478	No	Smoking for >30 years, 20 sticks/d	Squamous cell carcinoma	T1cN0M0	IA3	2.5×2.5×2	2.5	N		TP53 c.833C>G p.P278R	0.0547278
YH105	80802065	Male	66	30	2.58	Lung cancer of father	No	Squamous cell carcinoma	T1cN0M0	IA3	3×2.5×2	3	TP53 c.856G>T p.E286*	0.00636823	TP53 c.856G>T p.E286*	0.537694
YH105	80802065	Male	66	30	2.58	Lung cancer of father	No	Squamous cell carcinoma	T1cN0M0	IA3	3×2.5×2	3	RB1 c.1333C>T p.R445*	0.00223928	RB1 c.1333C>T p.R445*	0.490703
YH106	09220574a	Male	54	30	0.772	Lung cancer of father	Cessed smoking for 9 years, used to smoke 20 sticks/d for >20 years	Lung adenocarcinoma	T1cN0M0	IA3	2.5×2.5×1.5	2.5	N		FAM135B c.1673C>A p.S558Y	0.0242424
YH107	80802021	Female	65	30	0.822	No	No	Lung adenocarcinoma	T1cN0M0	IA3	2.5×1.5×1.2	2.5	N		ERBB2 c.428G>A p.R143Q	0.356141
YH108	80802027	Male	54	30	0.69	No	Smoking for 30 years, 40 sticks/d	Lung adenocarcinoma	T1cN0M0	IA3	2.5×2×2	2.5	N		EGFR c.2573T>G p.L858R	0.0680756
YH108	80802027	Male	54	30	0.69	No	Smoking for 30 years, 40 sticks/d	Lung adenocarcinoma	T1cN0M0	IA3	2.5×2×2	2.5	N		TP53 c.749C>T p.P250L	0.0251963
YH108	80802027	Male	54	30	0.69	No	Smoking for 30 years, 40 sticks/d	Lung adenocarcinoma	T1cN0M0	IA3	2.5×2×2	2.5	N		TP53 c.541C>T p.R181C	0.0160452
YH108	80802027	Male	54	30	0.69	No	Smoking for 30 years, 40 sticks/d	Lung adenocarcinoma	T1cN0M0	IA3	2.5×2×2	2.5	N		EGFR c.2326C>T p.R776C	0.0281564
YH109	1010020005	Female	59	30	1.35	No	No	Lung adenocarcinoma	T1cN0M0	IA3	2.4×1.5×1.5	2.4	GNAQ c.286A>T p.T96S	0.0118087	EGFR c.2235_2249delGGAATTAAGAGAAGC p.Glu746_Ala750del	0.0728713
YH109	1010020005	Female	59	30	1.35	No	No	Lung adenocarcinoma	T1cN0M0	IA3	2.4×1.5×1.5	2.4	GNAQ c.303C>A p.Y101*	0.0108401	N
YH110	1010030034	Male	64	30	0.804	No	Smoking for 40 years, 20 sticks/d	Lung adenocarcinoma	T1cN0M0	IA3	2.5×2×1.5	2.5	CD5L c.514G>A p.Ala172Thr	0.00192957	BRAF c.2128-4G>T .	0.0466073
YH111	1010030023	Female	68	30	0.274	No	No	Lung adenocarcinoma	T1cN0M0	IA3	2.5×1.7×1.5	2.5	N		N
YH112	1010020007	Male	65	30	0.83	No	No	Lung adenocarcinoma	T1cN0M0	IA3	2.2×1.5×1.5	2.2	GNAQ c.286A>T p.T96S	0.028979	EGFR c.2236_2250delGAATTAAGAGAAGCA p.E746_A750delELREA	0.0868897
YH112	1010020007	Male	65	30	0.83	No	No	Lung adenocarcinoma	T1cN0M0	IA3	2.2×1.5×1.5	2.2	GNAQ c.303C>A p.Y101*	0.0245167	N
YH113	7200410	Female	48	30	0.782	No	No	Lymphoid epithelioid carcinoma	T2aN0M0	IB	3.5×3.2×4.5	4.5	N		N
YH114	80802007	Male	76	30	0.352	No	No	Squamous cell carcinoma	T2aN0M0	IB	4×4×3	4	CDKN2A c.220G>T p.D74Y	0.00348432	N
YH115	80802005	Male	58	30	0.476	No	No	Lung adenocarcinoma	T2aN0M0	IB	2.5×2×1.5	2.5	N		TP53 c.524G>A p.R175H	0.26139
YH115	80802005	Male	58	30	0.476	No	No	Lung adenocarcinoma	T2aN0M0	IB	2.5×2×1.5	2.5	N		EGFR c.2573T>G p.L858R	0.206306
YH116	7180407	Female	43	30	0.584	No	No	Lung adenocarcinoma	T2aN0M0	IB	1.5	1.5	N		N
YH117	5160261	Female	51	30	0.92	No	No	Lung adenocarcinoma	T2N0M0	IB	2×1.6	2	U2AF1 c.692C>T p.S231L	0.00484496	U2AF1 c.692C>T p.S231L	0.0177803
YH117	5160261	Female	51	30	0.92	No	No	Lung adenocarcinoma	T2N0M0	IB	2×1.6	2	SMAD4 c.1082G>A p.R361H	0.00168539	EGFR c.2573T>G p.L858R	0.157569
YH118	6200340	Female	59	30	0.992	No	No	Lung adenocarcinoma	T2aN0M0	IB	3.5×3×2.5	3.5	ALK c.2258G>A p.Arg753Gln	0.0141364	EGFR c.2573T>G p.L858R	0.100543
YH119	3060198	Male	36	30	1.13	No	No	Lung adenocarcinoma	T2aN0M0	IB	2.4	2.4	N		EGFR c.2236_2250delGAATTAAGAGAAGCA p.E746_A750delELREA	0.243468
YH120	6210347	Male	65	30	0.838	No	Smoking for >30 years, 1 pcak/d	Lung adenocarcinoma	T2N0M0	IB	3.5×3.7×3	3.7	N		TP53 c.841G>T p.D281Y	0.175549
YH121	3240224	Male	60	30	0.66	No	Smoking for 40 years, 15 sticks/d	Lung adenocarcinoma	T2N0M0	IB	1.3	1.3	N		N
YH122	5030240	Male	70	30	0.462	No	Cessed to smoke for a month, used to smoke 10 packs/d for >50 years	Lung adenocarcinoma	T2aN0M0	IB	3.5×1.5×2	3.5	N		KRAS c.35G>A p.G12D	0.0719405
YH122	5030240	Male	70	30	0.462	No	Cessed to smoke for a month, used to smoke 10 packs/d for >50 years	Lung adenocarcinoma	T2aN0M0	IB	3.5×1.5×2	3.5	N		TP53 c.817C>G p.R273G	0.0494931
YH123	09300590a	Male	63	30	2.58	No	Smoked for >30 years, 1.5 packs/d	Squamous cell carcinoma	T2aN0M0	IB	4×4×3.5	4	RYR2 c.11746G>T p.V3916F	0.00163488	TP53 c.701A>G p.Y234C	0.176149
YH123	09300590a	Male	63	30	2.58	No	Smoked for >30 years, 1.5 packs/d	Squamous cell carcinoma	T2aN0M0	IB	4×4×3.5	4	NF1 c.2027delC p.P678fs*10	0.0114428	SMARCA4 c.3702C>G p.F1234L	0.116189
YH123	09300590a	Male	63	30	2.58	No	Smoked for >30 years, 1.5 packs/d	Squamous cell carcinoma	T2aN0M0	IB	4×4×3.5	4	N		RYR2 c.11746G>T p.V3916F	0.0776819
YH124	1010030004	Female	45	30	0.418	No	No	Lung adenocarcinoma	T2N0M0	IB	2×1.5×1	2	N		EGFR c.2573T>G p.L858R	0.183433
YH125	1010030005	Female	69	30	0.728	No	No	Lung adenocarcinoma	T2N0M0	IB	2×1.8×1.5	2	N		EGFR c.2235_2249delGGAATTAAGAGAAGC p.Glu746_Ala750del	0.196988
YH126	1010030007	Female	58	30	0.748	No	No	Pulmonary mucinous adenocarcinoma	T2N0M0	IB	1.5×1.5×1.2	1.5	N		CDKN2A c.151-1G>T p.?	0.0926589
YH126	1010030007	Female	58	30	0.748	No	No	Pulmonary mucinous adenocarcinoma	T2N0M0	IB	1.5×1.5×1.2	1.5	N		SMAD4 c.1052A>G p.D351G	0.0369596
YH127	10170601a	Male	60	30	1.2	No	No	Lung adenocarcinoma	T2aN0M0	IB	3.5×3.5×2	3.5	N		N
YH128	10170603a	Male	55	30	0.642	No	No	Lung adenocarcinoma	T2N0M0	IB	2×1.5×1	2	N		TP53 c.818G>T p.R273L	0.440019
YH128	10170603a	Male	55	30	0.642	No	No	Lung adenocarcinoma	T2N0M0	IB	2×1.5×1	2	N		EGFR c.2235_2249del15 p.E746_A750delELREA	0.344253
YH129	10170604a	Male	55	30	1.49	No	Smoked for >50 years, 20 sticks/d	Squamous cell carcinoma	T2N0M0	IB	2.5×2×1.8	2.5	N		TP53 c.535C>T p.H179Y	0.357714
YH130	10170607a	Male	69	30	1.18	No	Smoked for >50 years, 20 sticks/d	Squamous cell carcinoma	T2aN0M0	IB	4×4×3	4	TP53 c.733G>T p.G245C	0.0025413	TP53 c.733G>T p.G245C	0.219199
YH131	1010030009	Female	47	30	0.78	No	No	Lung adenocarcinoma	T2aN0M0	IB	3.6×3.5×3	3.6	EGFR c.2573T>G p.L858R	0.00125	EGFR c.2573T>G p.L858R	0.500712
YH131	1010030009	Female	47	30	0.78	No	No	Lung adenocarcinoma	T2aN0M0	IB	3.6×3.5×3	3.6	FGFR3 c.742C>T p.R248C	0.00147493	TP53 c.380C>T p.S127F	0.300091
YH131	1010030009	Female	47	30	0.78	No	No	Lung adenocarcinoma	T2aN0M0	IB	3.6×3.5×3	3.6	TP53 c.460G>A p.G154S	0.00210084	N
YH132	09220563a	Male	66	30	0.936	No	No	Squamous cell carcinoma	T2aN0M0	IB	3.5×3×2.5	3.5	TP53 c.578A>G p.H193R	0.00212014	TP53 c.578A>G p.H193R	0.100879
YH132	09220563a	Male	66	30	0.936	No	No	Squamous cell carcinoma	T2aN0M0	IB	3.5×3×2.5	3.5	PIK3CA c.1624G>A p.E542K	0.00123533	PIK3CA c.1624G>A p.E542K	0.082503
YH133	09220565a	Female	56	30	0.768	Lung cancer of father	No	Lung adenocarcinoma	T2aN0M0	IB	3.3×2×1.5	3.3	STK11 c.837delC p.P281fs*6	0.00671141	EGFR c.2238_2252del15 p.L747_T751delLREAT	0.106706
YH133	09220565a	Female	56	30	0.768	Lung cancer of father	No	Lung adenocarcinoma	T2aN0M0	IB	3.3×2×1.5	3.3	ARID1A c.5541_5542insG p.D1850fs*4	0.00615114	N
YH134	80802069	Male	79	30	1.26	No	Smoked for >40 years, 50 sticks/d	Squamous cell carcinoma	T2aN0M0	IB	4×3×2	4	SMAD4 c.1486C>T p.R496C	0.00335289	TP53 c.796G>A p.G266R	0.0865762
YH135	80802083	Female	63	30	0.682	No	No	Lung adenocarcinoma	T2N0M0	IB	1.8×1.5×1.5	1.8	N		EGFR c.2235_2249del15 p.E746_A750delELREA	0.0665552
YH136	80802011	Female	27	30	0.71	No	No	Pulmonary mucin epidermoid carcinoma	T2N0M0	IB	1×0.6×1	1	N		TP53 c.75-40G>A .	0.02457
YH137	5080243	Male	62	30	0.388	No	Smoked for >40 years, 40 sticks/d	Squamous cell carcinoma	T2aN0M0	IB	3.8×3.5×3	3.8	TP53 c.783-1G>T .	0.0175439	TP53 c.783-1G>T .	0.347368
YH138	1010030033	Male	59	30	0.728	No	Smoked for >40 years, 20 sticks/d	Squamous cell carcinoma	T2aN0M0	IB	3.5×2.5×2	3.5	EGFR c.2582T>A p.L861Q	0.00598563	EGFR c.2582T>A p.L861Q	0.730655
YH139	1010030013	Male	66	30	0.87	No	No	Lung adenocarcinoma	T2N0M0	IB	1.9×1.5×1	1.9	N		N
YH140	1010030038	Female	54	30	0.674	No	No	Lung adenocarcinoma	T2N0M0	IB	3×3×3	3	N		EGFR c.2573T>G p.L858R	0.892881
YH141	1010030025	Female	47	30	0.56	No	No	Lung adenocarcinoma	T2N0M0	IB	1.2×1×1	1.2	KMT2C c.2263C>T p.Q755*	0.0232404	BRAF c.1799T>A p.V600E	0.185953
YH142	1010030019	Male	72	30	0.98	No	No	Lung adenocarcinoma	T2aN0M0	IB	3.5×3×2	3.5	KMT2C c.2674G>A p.G892R	0.00459506	TP53 c.592G>T p.E198*	0.196637
YH142	1010030019	Male	72	30	0.98	No	No	Lung adenocarcinoma	T2aN0M0	IB	3.5×3×2	3.5	TP53 c.592G>T p.E198*		N
YH143	1010030028	Male	69	30	0.412	No	Cessed smoking for 3 years, used to smoke 20 sticks/d for 30 years	Squamous cell carcinoma	T2aN0M0	IB	4×4×3	4	TP53 c.475G>C p.A159P	0.0241805	BRAF c.2128-4G>T .	0.0555556
YH144	5250275	Female	69	30	1.8	No	No	Squamous cell carcinoma	T3N0M0	IIA	8×5×4	8	N		N
YH145	80802003	Male	71	30	0.392	No	Cessed smoking for 4 weeks used to smoke 20 sticks/d for 50 years	Squamous cell carcinoma	T2bN0M0	IIA	4×3×5	5	TP53 c.673-2A>T .	0.0746411	TP53 c.673-2A>T .	0.125815
YH146	5160260	Female	67	30	0.796	No	No	Lung adenocarcinoma	T2bN0M0	IIA	4.5×3	4.5	NOTCH1 c.7233A>G p.P2411P	0.00765306	EGFR c.2573T>G p.L858R	0.0866313
YH146	5160260	Female	67	30	0.796	No	No	Lung adenocarcinoma	T2bN0M0	IIA	4.5×3	4.5	N		PIK3CA c.1624G>C p.E542Q	0.0746372
YH146	5160260	Female	67	30	0.796	No	No	Lung adenocarcinoma	T2bN0M0	IIA	4.5×3	4.5	N		EGFR c.2238_2252del15 p.L747_T751delLREAT	0.0564269
YH147	6070305	Male	68	30	0.814	No	No	Squamous cell carcinoma	T2bN0M0	IIA	5.5×5×4.5	5.5	TP53 c.824G>T p.C275F	0.00239425	TP53 c.824G>T p.C275F	0.0667476
YH147	6070305	Male	68	30	0.814	No	No	Squamous cell carcinoma	T2bN0M0	IIA	5.5×5×4.5	5.5	SMARCA4 c.3493C>T p.L1165F	0.00178731	SMARCA4 c.3493C>T p.L1165F	0.0659341
YH147	6070305	Male	68	30	0.814	No	No	Squamous cell carcinoma	T2bN0M0	IIA	5.5×5×4.5	5.5	TP53 c.734G>A p.G245D	0.00247985	N
YH148	8010444	Male	62	30	1.7	No	Smoked for >40 years, 20 sticks/d	Lung adenocarcinoma	T2bN0M0	IIA	3.5×3×2.5	3.5	RYR2 c.365G>A p.R122H	0.00376648	TP53 c.747G>T p.R249S	0.154894
YH148	8010444	Male	62	30	1.7	No	Smoked for >40 years, 20 sticks/d	Lung adenocarcinoma	T2bN0M0	IIA	3.5×3×2.5	3.5	N		CSMD3 c.4741C>A p.P1581T	0.105234
YH149	80802061	Male	64	30	0.486	No	No	Squamous cell carcinoma	T2bN0M0	IIA	4×3.5×5	5	TP53 c.706T>G p.Y236D	0.00944767	TP53 c.706T>G p.Y236D	0.364573
YH150	80802059	Male	52	30	0.754	No	Smoked for >30 years, 40 sticks/d	Lung adenocarcinoma	T2bN0M0	IIA	5×3×3.5	5	TP53 c.460G>A p.G154S	0.00271985	TP53 c.460G>A p.G154S	0.0667132
YH150	80802059	Male	52	30	0.754	No	Smoked for >30 years, 40 sticks/d	Lung adenocarcinoma	T2bN0M0	IIA	5×3×3.5	5	N		TP53 c.813G>T p.E271D	0.0806124
YH150	80802059	Male	52	30	0.754	No	Smoked for >30 years, 40 sticks/d	Lung adenocarcinoma	T2bN0M0	IIA	5×3×3.5	5	N		STK11 c.725G>T p.G242V	0.0579823
YH151	1010020004	Male	78	30	1.62	No	No	Lung adenocarcinoma	T2bN0M0	IIA	4.5×2.7×2	4.5	N		EGFR p.L861Q , c.2582T>A	0.146918
YH152	09300589a	Female	51	30	0.648	No	No	Pulmonary adenocarcinoma	T3N0M0	IIB	1×1×0.7	1	EGFR c.3114+27_3114+30delTCTC .	0.0340087	EGFR c.2235_2249del15 p.E746_A750delELREA	0.110653
YH153	80802039	Male	76	30	0.67	No	Cessed to smoke for 2 months but used to smoke 10 sticks/d for >60 years	Lung adenocarcinoma	T2aN1M0	IIB	2.5×2×1.5	2.5	N		ERBB2 c.2264T>C p.L755S	0.0963719
YH154	1010030001	Male	67	30	0.726	No	Smoked for >40 years, 20 sticks/d	Squamous cell carcinoma	T2aN1M0	IIB	3.5×3×2	3.5	TP53 c.746G>T p.R249M	0.0443038	TP53 c.746G>T p.R249M	0.540409
YH155	80802023	Male	55	30	0.598	No	Cessed smoking for 2 weeks used to smoke 20 sticks/d for 40 years	Squamous cell carcinoma	T2aN1M0	IIB	3.5×3×2.8	3.5	TP53 c.742C>T p.R248W	0.0094451	TP53 c.742C>T p.R248W	0.431525
YH156	5130256	Male	73	30	0.616	No	Smoking 10 sticks/d	Lung adenocarcinoma	T3N0M0	IIB	6.8×4.5×3.5	6.8	CDKN2A c.71G>C p.R24P	0.00733496	CDKN2A c.71G>C p.R24P	0.179335
YH156	5130256	Male	73	30	0.616	No	Smoking 10 sticks/d	Lung adenocarcinoma	T3N0M0	IIB	6.8×4.5×3.5	6.8	TP53 c.129delG p.M44fs*79	0.00366748	TP53 c.129delG p.M44fs*79	0.177711
YH157	6070306	Male	75	30	0.978	No	Smoked for >10 years	Squamous cell carcinoma	T3N0M0	IIB	6.5×5×3	6.5	CDKN2A c.150+5delG p.?	0.205672	CDKN2A c.150+5delG p.?	0.0039823
YH157	6070306	Male	75	30	0.978	No	Smoked for >10 years	Squamous cell carcinoma	T3N0M0	IIB	6.5×5×3	6.5	CSMD3 c.8894C>T p.P2965L	0.20491	CSMD3 c.8894C>T p.P2965L	0.00418605
YH157	6070306	Male	75	30	0.978	No	Smoked for >10 years	Squamous cell carcinoma	T3N0M0	IIB	6.5×5×3	6.5	TP53 c.467G>C p.R156P	0.196083	TP53 c.467G>C p.R156P	0.00414556
YH157	6070306	Male	75	30	0.978	No	Smoked for >10 years	Squamous cell carcinoma	T3N0M0	IIB	6.5×5×3	6.5	TP53 c.801delG p.N268fs*77	0.0758382	TP53 c.801delG p.N268fs*77	0.00223839
YH158	1110077	Male	66	30	0.85	No	No	Lung adenocarcinoma	T1bN1M0	IIB	1.2/0.8	1.2	TP53 c.695T>G p.I232S	0.00289331	N
YH159	6210348	Female	68	30	1.67	No	No	Lung adenocarcinoma	T2aN1M0	IIB	4×4×1.8	4	NF1 c.3916C>T p.R1306*	0.00191755	N
YH160	7250425	Male	60	30	0.592	No	Smoked for >30 years, 8 sticks/d, smokeing index = 240	Lung adenocarcinoma	T1cN1M0	IIB	2×1.8×1.5	2	EGFR c.2573T>G p.L858R	0.00201816	EGFR c.2573T>G p.L858R	0.172476
YH161	1010030002	Female	54	30	0.852	No	No	Lung adenocarcinoma	T2N1aM0	IIB	3×3×2.5	3	N		TP53 c.637C>T p.R213*	0.33299
YH161	1010030002	Female	54	30	0.852	No	No	Lung adenocarcinoma	T2N1aM0	IIB	3×3×2.5	3	N		EGFR c.2240_2257del18 p.L747_P753>S	0.111348
YH161	1010030002	Female	54	30	0.852	No	No	Lung adenocarcinoma	T2N1aM0	IIB	3×3×2.5	3	N		PTEN c.733C>T p.Q245*	0.0161117
YH162	1010030003	Female	60	30	1.69	No	No	Lung adenocarcinoma	T2N1aM0	IIB	3.7×3.2×2.2	3.7	GNAS c.602G>A p.R201H	0.00633198	TP53 c.536A>G p.H179R	0.377915
YH163	10170605a	Male	62	30	0.798	No	No	Squamous cell carcinoma	T3N0M0	IIB	7×7×5	7	TP53 c.372C>A p.C124*	0.00786627	TP53 c.372C>A p.C124*	0.255196
YH163	10170605a	Male	62	30	0.798	No	No	Squamous cell carcinoma	T3N0M0	IIB	7×7×5	7	TP53 c.514G>T p.V172F	0.012	TP53 c.514G>T p.V172F	0.234734
YH164	10170610a	Female	46	30	2.38	No	No	Lung adenocarcinoma	T2bN1bM0	IIB	4.5×4×3	4.5	NOTCH1 c.2364C>T p.C788C	0.00387222	NOTCH1 c.2364C>T p.C788C	0.0102564
YH164	10170610a	Female	46	30	2.38	No	No	Lung adenocarcinoma	T2bN1bM0	IIB	4.5×4×3	4.5	CDKN2A c.10G>T p.A4S	0.00578428	TP53 c.404G>T p.C135F	0.466123
YH164	10170610a	Female	46	30	2.38	No	No	Lung adenocarcinoma	T2bN1bM0	IIB	4.5×4×3	4.5	N		EGFR c.2573T>G p.L858R	0.366655
YH165	1010030012	Female	58	30	1.34	No	No	Lung adenocarcinoma	T2N1bM0	IIB	3×2×2	3	TP53 c.916C>T p.R306*	0.00139958	EGFR c.2573T>G p.L858R	0.18024
YH165	1010030012	Female	58	30	1.34	No	No	Lung adenocarcinoma	T2N1bM0	IIB	3×2×2	3	N		TP53 c.574C>T p.Q192*	0.123596
YH166	80802063	Male	54	30	0.542	No	No	Lung adenocarcinoma	T2aN1M0	IIB	4×4×3	4	EGFR c.2236_2250del15 p.E746_A750delELREA	0.0016488	EGFR c.2236_2250del15 p.E746_A750delELREA	0.158009
YH166	80802063	Male	54	30	0.542	No	No	Lung adenocarcinoma	T2aN1M0	IIB	4×4×3	4	N		TP53 c.774A>T p.E258D	0.122735
YH167	09150547a	Male	63	30	1.26	No	Cessed to smoke for 5 months, used to smoke 20 sticks/d for > 30 years	Lung adenocarcinoma	T3N0M0	IIB	1.5×1.3×1.3（右上肺） 2×2×1（右上肺）	2	IDH2 c.419G>A p.R140Q	0.00314575	KRAS c.35G>A p.G12D	0.28046
YH168	80802067	Male	65	30	0.766	No	Smoked for >40 years, 20 sticks/d	Lung adenocarcinoma	T1bN1M0	IIB	1.8×1.5×1.5	1.8	N		TP53 c.637C>T p.R213*	0.0118953
YH168	80802067	Male	65	30	0.766	No	Smoked for >40 years, 20 sticks/d	Lung adenocarcinoma	T1bN1M0	IIB	1.8×1.5×1.5	1.8	N		SMARCA4 c.2729C>T p.T910M	0.157836
YH169	80802031	Female	62	30	1.72	No	No	Lung adenocarcinoma	T1bN1M0	IIB	1.5×1.5×1.2	1.5	ROS1 c.6234-38G>A .	0.013013	TP53 c.707A>G p.Y236C	0.108389
YH170	1010030051	Male	43	30	0.124	No	No	Lung adenocarcinoma	T3N0M0	IIB	2.5×2.5×2	2.5	N		CTNNB1 p.S37F , c.110C>T	0.0536205
YH171	1010030050	Male	63	30	5.8	No	No	Squamous cell carcinoma	T3N0M0	IIB	6×6×3.5	6	PIK3CA c.1624G>A p.E542K	0.0301399	PIK3CA c.1624G>A p.E542K	0.0589226
YH171	1010030050	Male	63	30	5.8	No	No	Squamous cell carcinoma	T3N0M0	IIB	6×6×3.5	6	TP53 c.568C>A p.P190T	0.0434893	KMT2C c.947C>G p.T316S	0.00232793
YH171	1010030050	Male	63	30	5.8	No	No	Squamous cell carcinoma	T3N0M0	IIB	6×6×3.5	6	KMT2C c.947C>G p.T316S	0.00232793	N
YH172	1010030053	Female	54	30	0.508	No	No	Lung adenocarcinoma	T3N0M0	IIB	2.5×2×1.8	2.5	N		EGFR p.L858R , c.2573T>G	0.132363
YH173	1010030014	Male	76	30	1.25	No	No	Squamous cell carcinoma	T4N0M0	IIIA	9×8×4.5	9	KMT2C c.2674G>A p.G892R	0.0234157	TP53 p.V157F , c.469G>T	0.369952
YH174	1010030047	Female	51	30	0.946	No	No	Lung adenocarcinoma	T3N1bM0	IIIA	4×3×3	4	KMT2C c.2674G>A p.G892R	0.0239753	KMT2C c.2674G>A p.G892R	0.0122861
YH175	09300596a	Male	61	30	1.32	No	Cessded to smoke for 2 weeks, used to smoke 13 sticks/d for >40 years	Lung adenocarcinoma	T4N0M0	IIIA	1.8×1×1	1.8	EGFR c.2281G>A p.D761N	0.00366972	KRAS c.34G>T p.G12C	0.167538
YH176	09300594a	Female	56	30	0.73	No	No	Lung adenocarcinoma	T4N0M0	IIIA	2.5×2×2	2.5	PTEN c.795delA p.K267fs*9	0.0101476	EGFR c.2235_2249del15 p.E746_A750delELREA	0.158428
YH177	6280368	Female	75	30	1.23	HCC of father	No	Lung adenocarcinoma	T2aN2M0	IIIA	3.6×3.1×1.7	3.6	EGFR c.2239_2256del18 p.L747_S752delLREATS	0.0242343	EGFR c.2239_2256del18 p.L747_S752delLREATS	0.246965
YH178	6020288	Male	53	30	1.54	No	No	Lung adenocarcinoma	T2aN2M0	IIIA	5×4×3.5	5	RET c.2308C>T p.R770*	0.0015	SNTG1 c.961C>A p.P321T	0.0148
YH179	5310284	Female	54	30	0.802	No	No	Squamous cell carcinoma	T4N1M0	IIIA	8×7	8	TP53 c.643A>G p.S215G	0.0772947	TP53 c.643A>G p.S215G	0.17296
YH179	5310284	Female	54	30	0.802	No	No	Squamous cell carcinoma	T4N1M0	IIIA	8×7	8	CDKN2A c.373delG p.D125fs*21	0.0611814	CDKN2A c.373delG p.D125fs*21	0.116266
YH180	7190409	Male	68	30	0.772	No	Smoked for >40 years, 1 pack/d	Lung adenocarcinoma	T2bN0M0	IIIA	5×4×3	5	COL19A1 c.3026C>T p.P1009L	0.00165929	N
YH181	7270431	Male	49	30	0.376	No	Smoked for >30 years, 20 sticks/d, smokeing index = 600	Lung adenocarcinoma	T1bN2M0	IIIA	1.3×1×0.8	1.3	N		EGFR c.2573T>G p.L858R	0.191263
YH182	80802043	Male	53	30	0.914	No	Smoked for >20 years, 20 sticks/d, with a cessassion of >10 years in between	Adenoid cystic carcinoma of the lung	T4N0M0	IIIA	6.8×7.5×10	10	CSMD3 c.4906G>T p.E1636*	0.00115207	ADAMTS20 c.3623G>C p.C1208S	0.0118421
YH182	80802043	Male	53	30	0.914	No	Smoked for >20 years, 20 sticks/d, with a cessassion of >10 years in between	Adenoid cystic carcinoma of the lung	T4N0M0	IIIA	6.8×7.5×10	10	CACNA1E c.6137G>A p.R2046Q	0.0011976	FAM5C c.1848C>A p.N616K	0.0114025
YH183	1010030010	Male	69	30	5.84	No	Cessed smoking for 3 years, used to smoke 20 sticks/d for >30 years	Squamous cell carcinoma	T4N0M0	IIIA	14×9×9	14	TP53 c.811G>T p.E271*	0.437428	TP53 c.811G>T p.E271*	0.234501
YH184	9150542a	Female	63	30	1.39	No	No	Squamous cell carcinoma	T4N0M0	IIIA	8×4.5×4.5	8	TP53 c.659A>G p.Y220C	0.165846	TP53 c.659A>G p.Y220C	0.467347
YH184	9150542a	Female	63	30	1.39	No	No	Squamous cell carcinoma	T4N0M0	IIIA	8×4.5×4.5	8	EGFR c.2236_2250del15 p.E746_A750delELREA	0.0702703	EGFR c.2236_2250del15 p.E746_A750delELREA	0.40356
YH185	1010040001	Male	58	30	0.564	No	No	Squamous cell carcinoma	T1N2M0	IIIA	3×3	3	CSMD3 c.3001G>A p.E1001K	0.00203943	N
YH186	1010030018	Female	64	30	0.336	No	No	Lung adenocarcinoma	T1N3M0	IIIB	2×2×1.8	2	EGFR c.2062-3delC .	0.0096823	EGFR p.L858R , c.2573T>G	0.18872
YH187	3220221	Male	72	30	1.22	Lung cancer of elder brother, gastric cancer lung metastasis of third brother	Smoked for >40 years, 1 pack/d	Lung adenosquamous carcinoma	T3N2M0	IIIB	3.3×2.2×2.4	3.3	ERBB2 c.2524G>A p.V842I	0.00214823	TP53 c.736A>T p.M246L	0.160875
YH187	3220221	Male	72	30	1.22	Lung cancer of elder brother, gastric cancer lung metastasis of third brother	Smoked for >40 years, 1 pack/d	Lung adenosquamous carcinoma	T3N2M0	IIIB	3.3×2.2×2.4	3.3	N		KRAS c.34G>T p.G12C	0.14211
YH188	6190338	Male	67	30	0.68	No	Smoked for >45 years, 1.5 pack/d	Lung adenocarcinoma	T3N2M0	IIIB	Nodule 1:3×3×1 Nodule 2:2×1×0.5	3	KRAS c.35G>T p.G12V	0.0178174	KRAS c.35G>T p.G12V	0.153543
YH188	6190338	Male	67	30	0.68	No	Smoked for >45 years, 1.5 pack/d	Lung adenocarcinoma	T3N2M0	IIIB	Nodule 1:3×3×1 Nodule 2:2×1×0.5	3	STK11 c.667G>T p.E223*	0.0107108	STK11 c.667G>T p.E223*	0.125406
YH189	1010030026	Male	63	30	0.588	Lung cancer of second brother	No	Squamous cell carcinoma	T3N2M0	IIIB	5×5×3	5	KEAP1 c.814C>T p.R272C	0.0017043	EGFR c.2062-3delC .	0.0113208
YH190	7040381	Male	41	30	0.986	No	Smoked for 10 years, 0.5 pack/d	Lung adenocarcinoma brain metastasis	T2aN0M1b	IVA	3.3×2.3×2.8	3.3	N		TP53 c.484A>T p.I162F	0.0481611
YH190	7040381	Male	41	30	0.986	No	Smoked for 10 years, 0.5 pack/d	Lung adenocarcinoma brain metastasis	T2aN0M1b	IVA	3.3×2.3×2.8	3.3	N		EGFR c.2497T>G p.L833V	0.0121107
YH191	5230272	Male	66	30	0.718	No	No	Lung adenocarcinoma	T1bNxM1a	IVA	1	1	NOTCH2 c.-41A>C .	0.00572519	NOTCH2 c.-41A>C .	0.0122746
YH191	5230272	Male	66	30	0.718	No	No	Lung adenocarcinoma	T1bNxM1a	IVA	1	1	N		BRAF c.1406G>C p.G469A	0.234043
YH192	1010030015	Male	60	30	0.722	No	No	Lung adenocarcinoma with intrapleural metastasis	T2N0M1a	IVA	2×1.5×2	2	EGFR c.2573T>G p.L858R	0.0010929	EGFR c.2573T>G p.L858R	0.230323
YH192	1010030015	Male	60	30	0.722	No	No	Lung adenocarcinoma with intrapleural metastasis	T2N0M1a	IVA	2×1.5×2	2	EGFR c.2327G>A p.R776H	0.00217628	TP53 c.1000G>T p.G334W	0.213711
