# Supplementary material
Source: HighWire-hosted journal article supplement (https://jmg.bmj.com/content/jmedgenet-2018-105825)
Supplement: inline-supplementary-material-2 [file inline-supplementary-material-2.xlsx]

## Sheet: Summary
	No. Samples	No. Mutation Sites	No. Shared Sites	No. Specific Sites
Benign	56	1963	1201	762
Malignant	136	4370		3169
Total	192	6333	1201	3931
Note: Variation filterinng criteria is set as: 1) Sequencing depth >=500; 2) VAF between 0.5%-25%; 3) Only sites annotated as “missense_variant”."stop_gained" and "splice_region_variant" are kept.

## Sheet: Difference>2_fold
clinical	chr	position	ref	alt	HGVS_P	HGVS_C	gene	variant_type	COSMIC_CNT	CNT_LUNG	No. Samples	Average Depth	Avg MAF	SD	% Occurrence
Malignant	7	151875101	A	T	p.?	c.7443-6T>A	KMT2C	splice_region_variant&intron_variant	2	2	53	1418.98	0.0802955	0.104387	0.389706
Benign	7	151875101	A	T	p.?	c.7443-6T>A	KMT2C	splice_region_variant&intron_variant	2	2	27	1609.48	0.0233819	0.0492507	0.482143
Malignant	11	1651119	C	T	p.Arg17Cys	c.49C>T	KRTAP5-5	missense_variant	8	1	16	2480.06	0.0235421	0.0388744	0.117647
Benign	11	1651119	C	T	p.Arg17Cys	c.49C>T	KRTAP5-5	missense_variant	8	1	3	2581.33	0.00575034	0.000463021	0.0535714
Malignant	5	170837513	C	T	.	c.847-18C>T	NPM1	splice_region_variant&intron_variant	.	.	3	1150.67	0.0276424	0.018624	0.0220588
Benign	5	170837513	C	T	.	c.847-18C>T	NPM1	splice_region_variant&intron_variant	.	.	2	1733	0.00550425	0.000235546	0.0357143
Malignant	4	55561752	G	A	p.Val48Ile	c.142G>A	KIT	missense_variant	2	0	1	940	0.00531915	0	0.00735294
Benign	4	55561752	G	A	p.Val48Ile	c.142G>A	KIT	missense_variant	2	0	1	910	0.0230769	0	0.0178571
Malignant	10	43596179	G	A	p.?	c.337+9G>A	RET	splice_region_variant&intron_variant	50	0	1	1105	0.00723982	0	0.00735294
Benign	10	43596179	G	A	p.?	c.337+9G>A	RET	splice_region_variant&intron_variant	50	0	1	633	0.244866	0	0.0178571
Malignant	10	89692778	T	A	p.Tyr261Asn	c.781T>A	PTEN	missense_variant	1	0	1	575	0.0156522	0	0.00735294
Benign	10	89692778	T	A	p.Tyr261Asn	c.781T>A	PTEN	missense_variant	1	0	1	1387	0.00504686	0	0.0178571

## Sheet: Shared_sites
clinical	chr	position	ref	alt	HGVS_P	HGVS_C	gene	variant_type	COSMIC_CNT	CNT_LUNG	No. Samples	Average Depth	Avg MAF	SD	% Occurrence
Malignant	7	151927023	G	C	p.Tyr987*	c.2961C>G	KMT2C	stop_gained	3	0	136	5341.41	0.113957	0.0175949	1
Benign	7	151927023	G	C	p.Tyr987*	c.2961C>G	KMT2C	stop_gained	3	0	56	5716.32	0.113286	0.0228938	1
Malignant	7	151927067	T	C	p.Arg973Gly	c.2917A>G	KMT2C	missense_variant	3	0	136	7534.98	0.107743	0.0180508	1
Benign	7	151927067	T	C	p.Arg973Gly	c.2917A>G	KMT2C	missense_variant	3	0	56	7877.18	0.111105	0.0239732	1
Malignant	7	151932961	G	A	p.Arg904*	c.2710C>T	KMT2C	stop_gained	7	0	135	2976.21	0.0632767	0.0245295	0.992647
Benign	7	151932961	G	A	p.Arg904*	c.2710C>T	KMT2C	stop_gained	7	0	56	3140.61	0.0783945	0.0340948	1
Malignant	7	151933015	G	A	p.Arg886Cys	c.2656C>T	KMT2C	missense_variant	10	0	134	2117.06	0.0598407	0.0279901	0.985294
Benign	7	151933015	G	A	p.Arg886Cys	c.2656C>T	KMT2C	missense_variant	10	0	55	2108.95	0.0761788	0.0382839	0.982143
Malignant	7	151932945	C	T	p.Arg909Lys	c.2726G>A	KMT2C	missense_variant	29	0	135	2720.13	0.0900127	0.0374692	0.992647
Benign	7	151932945	C	T	p.Arg909Lys	c.2726G>A	KMT2C	missense_variant	29	0	53	2865.87	0.110073	0.0468717	0.946429
Malignant	7	151935853	T	C	p.Glu864Gly	c.2591A>G	KMT2C	missense_variant	9	0	135	3648.16	0.032021	0.0381527	0.992647
Benign	7	151935853	T	C	p.Glu864Gly	c.2591A>G	KMT2C	missense_variant	9	0	53	3719.49	0.0622356	0.0611763	0.946429
Malignant	7	151970877	G	A	p.Pro309Ser	c.925C>T	KMT2C	missense_variant	72	2	134	8099.16	0.0690968	0.0332494	0.985294
Benign	7	151970877	G	A	p.Pro309Ser	c.925C>T	KMT2C	missense_variant	72	2	54	8630.96	0.0769637	0.0378458	0.964286
Malignant	17	37879560	T	G	.	c.1947-12T>G	ERBB2	splice_region_variant&intron_variant	.	.	134	1993.31	0.0259242	0.0123706	0.985294
Benign	17	37879560	T	G	.	c.1947-12T>G	ERBB2	splice_region_variant&intron_variant	.	.	54	1931.52	0.0262625	0.0105904	0.964286
Malignant	1	237806606	G	GT	.	c.7222-12dupT	RYR2	splice_region_variant&intron_variant	.	.	133	1771.57	0.0311515	0.00633614	0.977941
Benign	1	237806606	G	GT	.	c.7222-12dupT	RYR2	splice_region_variant&intron_variant	.	.	54	1942.06	0.0324441	0.00656088	0.964286
Malignant	3	181430286	T	G	p.Asn46Lys	c.138T>G	SOX2	missense_variant	.	.	131	4149.02	0.0175045	0.00577373	0.963235
Benign	3	181430286	T	G	p.Asn46Lys	c.138T>G	SOX2	missense_variant	.	.	56	3584.93	0.0185132	0.00669272	1
Malignant	7	151921149	G	A	p.Arg1092*	c.3274C>T	KMT2C	stop_gained	.	.	133	1784.24	0.048813	0.0173244	0.977941
Benign	7	151921149	G	A	p.Arg1092*	c.3274C>T	KMT2C	stop_gained	.	.	54	1910.93	0.0533335	0.0163049	0.964286
Malignant	1	237619875	ATT	A	.	c.1477-12_1477-11delTT	RYR2	splice_region_variant&intron_variant	.	.	132	1919.45	0.0354075	0.0342582	0.970588
Benign	1	237619875	ATT	A	.	c.1477-12_1477-11delTT	RYR2	splice_region_variant&intron_variant	.	.	54	2067.39	0.0437563	0.0419724	0.964286
Malignant	19	10602731	T	G	p.Met283Leu	c.847A>C	KEAP1	missense_variant	1	0	131	2276.46	0.0190949	0.00726039	0.963235
Benign	19	10602731	T	G	p.Met283Leu	c.847A>C	KEAP1	missense_variant	1	0	55	2369.35	0.0184985	0.00771335	0.982143
Malignant	7	151921255	C	T	p.Trp1056*	c.3168G>A	KMT2C	stop_gained	2	0	131	1787.69	0.0330672	0.0117693	0.963235
Benign	7	151921255	C	T	p.Trp1056*	c.3168G>A	KMT2C	stop_gained	2	0	54	2054.61	0.0376392	0.0154023	0.964286
Malignant	1	237819090	A	AT	.	c.7966-20dupT	RYR2	splice_region_variant&intron_variant	.	.	130	1650.76	0.0629037	0.00887153	0.955882
Benign	1	237819090	A	AT	.	c.7966-20dupT	RYR2	splice_region_variant&intron_variant	.	.	54	1775.3	0.0671205	0.00899396	0.964286
Malignant	1	237819090	AT	A	.	c.7966-20delT	RYR2	splice_region_variant&intron_variant	.	.	130	1650.76	0.0852257	0.0105525	0.955882
Benign	1	237819090	AT	A	.	c.7966-20delT	RYR2	splice_region_variant&intron_variant	.	.	54	1775.3	0.0881356	0.010405	0.964286
Malignant	9	79959202	G	GT	p.?	c.7155+14dupT	VPS13A	splice_region_variant&intron_variant	1	0	131	1784.75	0.0212591	0.00541409	0.963235
Benign	9	79959202	G	GT	p.?	c.7155+14dupT	VPS13A	splice_region_variant&intron_variant	1	0	53	1842.6	0.0239247	0.00747166	0.946429
Malignant	6	70916830	A	AT	.	c.3302-11dupT	COL19A1	splice_region_variant&intron_variant	.	.	131	2266.01	0.0392371	0.0116386	0.963235
Benign	6	70916830	A	AT	.	c.3302-11dupT	COL19A1	splice_region_variant&intron_variant	.	.	52	2458	0.0444365	0.0101797	0.928571
Malignant	21	44521550	G	GA	.	c.133-9dupT	U2AF1	splice_region_variant&intron_variant	.	.	130	1525.39	0.0172567	0.00563288	0.955882
Benign	21	44521550	G	GA	.	c.133-9dupT	U2AF1	splice_region_variant&intron_variant	.	.	53	1464.32	0.0218553	0.0069029	0.946429
Malignant	7	116409675	C	CT	.	c.2638-9dupT	MET	splice_region_variant&intron_variant	.	.	130	1612.4	0.0894916	0.0196891	0.955882
Benign	7	116409675	C	CT	.	c.2638-9dupT	MET	splice_region_variant&intron_variant	.	.	52	1648.83	0.0941991	0.0266677	0.928571
Malignant	7	116409675	CTTT	C	.	c.2638-11_2638-9delTTT	MET	splice_region_variant&intron_variant	.	.	130	1612.4	0.0191577	0.00821728	0.955882
Benign	7	116409675	CTTT	C	.	c.2638-11_2638-9delTTT	MET	splice_region_variant&intron_variant	.	.	52	1648.83	0.0216654	0.0065195	0.928571
Malignant	7	151935866	G	A	p.Pro860Ser	c.2578C>T	KMT2C	missense_variant	10	1	132	3274.14	0.165054	0.0298957	0.970588
Benign	7	151935866	G	A	p.Pro860Ser	c.2578C>T	KMT2C	missense_variant	10	1	50	3535.42	0.178511	0.0397004	0.892857
Malignant	7	151935871	C	A	p.Trp858Leu	c.2573G>T	KMT2C	missense_variant	7	1	133	3060.77	0.162632	0.0306477	0.977941
Benign	7	151935871	C	A	p.Trp858Leu	c.2573G>T	KMT2C	missense_variant	7	1	49	3372.82	0.176331	0.0369546	0.875
Malignant	17	37868555	A	C	.	c.1022-20A>C	ERBB2	splice_region_variant&intron_variant	.	.	128	1364.73	0.0262179	0.00778617	0.941176
Benign	17	37868555	A	C	.	c.1022-20A>C	ERBB2	splice_region_variant&intron_variant	.	.	54	1297.96	0.0269588	0.00841422	0.964286
Malignant	17	37868559	A	C	.	c.1022-16A>C	ERBB2	splice_region_variant&intron_variant	.	.	128	1448.84	0.0271823	0.00842122	0.941176
Benign	17	37868559	A	C	.	c.1022-16A>C	ERBB2	splice_region_variant&intron_variant	.	.	54	1378.61	0.0289644	0.00777633	0.964286
Malignant	7	116409675	C	CTT	.	c.2638-10_2638-9dupTT	MET	splice_region_variant&intron_variant	.	.	130	1612.4	0.0150553	0.0046365	0.955882
Benign	7	116409675	C	CTT	.	c.2638-10_2638-9dupTT	MET	splice_region_variant&intron_variant	.	.	51	1670.69	0.0160131	0.00532885	0.910714
Malignant	7	116409675	CTT	C	.	c.2638-10_2638-9delTT	MET	splice_region_variant&intron_variant	.	.	129	1604.8	0.0567954	0.0265857	0.948529
Benign	7	116409675	CTT	C	.	c.2638-10_2638-9delTT	MET	splice_region_variant&intron_variant	.	.	52	1648.83	0.0636261	0.0217682	0.928571
Malignant	7	151935910	C	T	p.Gly845Glu	c.2534G>A	KMT2C	missense_variant	19	1	132	2548.37	0.0812091	0.0352682	0.970588
Benign	7	151935910	C	T	p.Gly845Glu	c.2534G>A	KMT2C	missense_variant	19	1	49	2707.27	0.108	0.0558274	0.875
Malignant	21	44521550	GA	G	.	c.133-9delT	U2AF1	splice_region_variant&intron_variant	.	.	129	1531.98	0.0128964	0.00400387	0.948529
Benign	21	44521550	GA	G	.	c.133-9delT	U2AF1	splice_region_variant&intron_variant	.	.	52	1481	0.0149966	0.0053155	0.928571
Malignant	7	151932997	C	T	p.Gly892Arg	c.2674G>A	KMT2C	missense_variant	12	1	128	2599.24	0.0123839	0.00557254	0.941176
Benign	7	151932997	C	T	p.Gly892Arg	c.2674G>A	KMT2C	missense_variant	12	1	52	2672.44	0.0169995	0.00745521	0.928571
Malignant	9	79954429	C	A	.	c.6379-3C>A	VPS13A	splice_region_variant&intron_variant	.	.	127	1467.86	0.0426495	0.0208351	0.933824
Benign	9	79954429	C	A	.	c.6379-3C>A	VPS13A	splice_region_variant&intron_variant	.	.	53	1518.7	0.0522655	0.0286776	0.946429
Malignant	10	89720679	C	A	p.Thr450Lys	c.1349C>A	PTEN	missense_variant	.	.	128	1766.64	0.0169181	0.00594746	0.941176
Benign	10	89720679	C	A	p.Thr450Lys	c.1349C>A	PTEN	missense_variant	.	.	52	1732.54	0.0201128	0.00729447	0.928571
Malignant	10	89720683	C	A	p.Phe451Leu	c.1353C>A	PTEN	missense_variant	1	0	129	1815.08	0.0220675	0.00677323	0.948529
Benign	10	89720683	C	A	p.Phe451Leu	c.1353C>A	PTEN	missense_variant	1	0	51	1809.22	0.026326	0.00855049	0.910714
Malignant	7	151919751	A	G	p.Cys1114Arg	c.3340T>C	KMT2C	missense_variant	6	0	125	1453.08	0.0539831	0.0185736	0.919118
Benign	7	151919751	A	G	p.Cys1114Arg	c.3340T>C	KMT2C	missense_variant	6	0	54	1483.94	0.0527963	0.014371	0.964286
Malignant	1	237619875	A	ATT	.	c.1477-12_1477-11dupTT	RYR2	splice_region_variant&intron_variant	.	.	127	1940.16	0.0904698	0.0560302	0.933824
Benign	1	237619875	A	ATT	.	c.1477-12_1477-11dupTT	RYR2	splice_region_variant&intron_variant	.	.	51	2050.16	0.0863831	0.0488152	0.910714
Malignant	7	151919159	G	GA	.	c.3434-9dupT	KMT2C	splice_region_variant&intron_variant	.	.	124	1487.06	0.0379315	0.00905772	0.911765
Benign	7	151919159	G	GA	.	c.3434-9dupT	KMT2C	splice_region_variant&intron_variant	.	.	54	1374.98	0.0470156	0.0135598	0.964286
Malignant	7	151919159	GA	G	.	c.3434-9delT	KMT2C	splice_region_variant&intron_variant	.	.	124	1487.06	0.0370458	0.0240998	0.911765
Benign	7	151919159	GA	G	.	c.3434-9delT	KMT2C	splice_region_variant&intron_variant	.	.	54	1374.98	0.042259	0.0116847	0.964286
Malignant	8	113323406	G	GA	.	c.7697-12dupT	CSMD3	splice_region_variant&intron_variant	.	.	125	1422.5	0.0367292	0.0163204	0.919118
Benign	8	113323406	G	GA	.	c.7697-12dupT	CSMD3	splice_region_variant&intron_variant	.	.	53	1371.58	0.0410421	0.0150209	0.946429
Malignant	8	113323406	GA	G	.	c.7697-12delT	CSMD3	splice_region_variant&intron_variant	.	.	125	1422.5	0.0148742	0.00586092	0.919118
Benign	8	113323406	GA	G	.	c.7697-12delT	CSMD3	splice_region_variant&intron_variant	.	.	53	1371.58	0.0213549	0.0275236	0.946429
Malignant	5	170837513	C	CT	.	c.847-5dupT	NPM1	splice_region_variant&intron_variant	.	.	127	1444.33	0.093523	0.0206702	0.933824
Benign	5	170837513	C	CT	.	c.847-5dupT	NPM1	splice_region_variant&intron_variant	.	.	50	1641.96	0.0992529	0.0251059	0.892857
Malignant	5	170837513	CTT	C	.	c.847-6_847-5delTT	NPM1	splice_region_variant&intron_variant	.	.	127	1444.33	0.0266836	0.013814	0.933824
Benign	5	170837513	CTT	C	.	c.847-6_847-5delTT	NPM1	splice_region_variant&intron_variant	.	.	50	1641.96	0.0301576	0.0145812	0.892857
Malignant	7	151970775	C	G	.	c.1012+15G>C	KMT2C	splice_region_variant&intron_variant	.	.	126	8455.47	0.180685	0.0323532	0.926471
Benign	7	151970775	C	G	.	c.1012+15G>C	KMT2C	splice_region_variant&intron_variant	.	.	50	9227.06	0.184633	0.0363535	0.892857
Malignant	10	89720659	G	T	p.Met443Ile	c.1329G>T	PTEN	missense_variant	1	0	124	1483.23	0.0274185	0.00774186	0.911765
Benign	10	89720659	G	T	p.Met443Ile	c.1329G>T	PTEN	missense_variant	1	0	51	1435.29	0.0300846	0.00836852	0.910714
Malignant	17	37873562	GC	G	p.?	c.1738-3delC	ERBB2	splice_region_variant&intron_variant	1	0	124	2487.99	0.00841473	0.00232495	0.911765
Benign	17	37873562	GC	G	p.?	c.1738-3delC	ERBB2	splice_region_variant&intron_variant	1	0	51	2452.86	0.00902548	0.00256186	0.910714
Malignant	7	151962265	C	T	p.Asp348Asn	c.1042G>A	KMT2C	missense_variant	48	0	122	5187.39	0.0392981	0.0203125	0.897059
Benign	7	151962265	C	T	p.Asp348Asn	c.1042G>A	KMT2C	missense_variant	48	0	52	5716.85	0.045908	0.0218641	0.928571
Malignant	10	89720653	C	A	p.Asp441Glu	c.1323C>A	PTEN	missense_variant	2	0	124	1402.15	0.0188989	0.00628246	0.911765
Benign	10	89720653	C	A	p.Asp441Glu	c.1323C>A	PTEN	missense_variant&splice_region_variant	2	0	50	1377.56	0.0222991	0.00737166	0.892857
Malignant	7	140434574	CA	C	p.?	c.2128-5delT	BRAF	splice_region_variant&intron_variant	1	0	123	1324.15	0.053703	0.0143446	0.904412
Benign	7	140434574	CA	C	p.?	c.2128-5delT	BRAF	splice_region_variant&intron_variant	1	0	50	1347.98	0.0563193	0.0130935	0.892857
Malignant	7	152055766	G	GA	p.?	c.162-7dupT	KMT2C	splice_region_variant&intron_variant	2	0	122	1295.83	0.103991	0.0161343	0.897059
Benign	7	152055766	G	GA	p.?	c.162-7dupT	KMT2C	splice_region_variant&intron_variant	2	0	51	1338.1	0.118603	0.0238054	0.910714
Malignant	7	152055766	G	GAA	.	c.162-8_162-7dupTT	KMT2C	splice_region_variant&intron_variant	.	.	122	1295.83	0.0227647	0.00512994	0.897059
Benign	7	152055766	G	GAA	.	c.162-8_162-7dupTT	KMT2C	splice_region_variant&intron_variant	.	.	51	1338.1	0.0256092	0.00576961	0.910714
Malignant	7	152055766	GA	G	p.?	c.162-7delT	KMT2C	splice_region_variant&intron_variant	1	0	122	1295.83	0.0522618	0.0101991	0.897059
Benign	7	152055766	GA	G	p.?	c.162-7delT	KMT2C	splice_region_variant&intron_variant	1	0	51	1338.1	0.0592591	0.0147955	0.910714
Malignant	9	79968359	C	A	p.Thr2485Lys	c.7454C>A	VPS13A	missense_variant	.	.	123	1489.28	0.0123137	0.00414807	0.904412
Benign	9	79968359	C	A	p.Thr2485Lys	c.7454C>A	VPS13A	missense_variant	.	.	50	1508.4	0.0149745	0.00498317	0.892857
Malignant	1	158583674	G	GA	.	c.6843-18dupT	SPTA1	splice_region_variant&intron_variant	.	.	121	2005.85	0.010497	0.00333409	0.889706
Benign	1	158583674	G	GA	.	c.6843-18dupT	SPTA1	splice_region_variant&intron_variant	.	.	51	2114.2	0.012276	0.00396946	0.910714
Malignant	1	158637865	GAA	G	.	c.1834-15_1834-14delTT	SPTA1	splice_region_variant&intron_variant	.	.	122	1301.69	0.0503144	0.0210362	0.897059
Benign	1	158637865	GAA	G	.	c.1834-15_1834-14delTT	SPTA1	splice_region_variant&intron_variant	.	.	50	1360.82	0.0604262	0.023672	0.892857
Malignant	6	70840124	ATT	A	.	c.1383+20_1383+21delTT	COL19A1	splice_region_variant&intron_variant	.	.	121	1683.3	0.010421	0.00318661	0.889706
Benign	6	70840124	ATT	A	.	c.1383+20_1383+21delTT	COL19A1	splice_region_variant&intron_variant	.	.	51	1800.24	0.011582	0.00393498	0.910714
Malignant	7	151891358	T	TA	.	c.4508-13dupT	KMT2C	splice_region_variant&intron_variant	.	.	123	1246.23	0.040689	0.0112029	0.904412
Benign	7	151891358	T	TA	.	c.4508-13dupT	KMT2C	splice_region_variant&intron_variant	.	.	49	1393.12	0.0526623	0.0168018	0.875
Malignant	7	151891358	TA	T	.	c.4508-13delT	KMT2C	splice_region_variant&intron_variant	.	.	123	1246.23	0.0658107	0.0160853	0.904412
Benign	7	151891358	TA	T	.	c.4508-13delT	KMT2C	splice_region_variant&intron_variant	.	.	49	1393.12	0.0796745	0.0258595	0.875
Malignant	8	113585880	C	A	p.Asp1298Tyr	c.3892G>T	CSMD3	missense_variant	1	0	120	1583.43	0.0152506	0.00661539	0.882353
Benign	8	113585880	C	A	p.Asp1298Tyr	c.3892G>T	CSMD3	missense_variant	1	0	52	1687.23	0.0171011	0.00640613	0.928571
Malignant	1	237965133	AT	A	.	c.14091-11delT	RYR2	splice_region_variant&intron_variant	.	.	120	1149.17	0.0928256	0.041207	0.882353
Benign	1	237965133	AT	A	.	c.14091-11delT	RYR2	splice_region_variant&intron_variant	.	.	50	1222.5	0.0914371	0.0400685	0.892857
Malignant	7	151935799	A	G	p.Ile882Thr	c.2645T>C	KMT2C	missense_variant	3	0	121	4620.94	0.1818	0.0289106	0.889706
Benign	7	151935799	A	G	p.Ile882Thr	c.2645T>C	KMT2C	missense_variant	3	0	49	5156.65	0.18587	0.040235	0.875
Malignant	10	43610164	G	A	p.Val706Met	c.2116G>A	RET	missense_variant	1	0	119	3496.18	0.0137042	0.00454133	0.875
Benign	10	43610164	G	A	p.Val706Met	c.2116G>A	RET	missense_variant	1	0	51	4841.04	0.0121487	0.00423541	0.910714
Malignant	1	158637865	GA	G	.	c.1834-14delT	SPTA1	splice_region_variant&intron_variant	.	.	121	1303.31	0.0674231	0.0554478	0.889706
Benign	1	158637865	GA	G	.	c.1834-14delT	SPTA1	splice_region_variant&intron_variant	.	.	48	1359.19	0.0987146	0.0690363	0.857143
Malignant	7	151875100	TA	T	.	c.7443-6delT	KMT2C	splice_region_variant&intron_variant	.	.	120	1293.67	0.0592916	0.0200055	0.882353
Benign	7	151875100	TA	T	.	c.7443-6delT	KMT2C	splice_region_variant&intron_variant	.	.	46	1434.91	0.0670935	0.0263052	0.821429
Malignant	7	151875100	TAA	T	p.?	c.7443-7_7443-6delTT	KMT2C	splice_region_variant&intron_variant	1	0	120	1293.67	0.0441769	0.0169407	0.882353
Benign	7	151875100	TAA	T	p.?	c.7443-7_7443-6delTT	KMT2C	splice_region_variant&intron_variant	1	0	46	1434.91	0.0529779	0.0262839	0.821429
Malignant	1	237905593	C	A	.	c.11092-3C>A	RYR2	splice_region_variant&intron_variant	.	.	117	1165.94	0.0153594	0.00552839	0.860294
Benign	1	237905593	C	A	.	c.11092-3C>A	RYR2	splice_region_variant&intron_variant	.	.	48	1227.77	0.0184259	0.00586039	0.857143
Malignant	2	116283454	G	GT	.	c.418-11dupT	DPP10	splice_region_variant&intron_variant	.	.	118	1120.55	0.0321019	0.00808142	0.867647
Benign	2	116283454	G	GT	.	c.418-11dupT	DPP10	splice_region_variant&intron_variant	.	.	47	1054.15	0.0395638	0.00891946	0.839286
Malignant	7	140434586	G	A	.	c.2128-16C>T	BRAF	splice_region_variant&intron_variant	.	.	118	1220.81	0.0199495	0.0117664	0.867647
Benign	7	140434586	G	A	.	c.2128-16C>T	BRAF	splice_region_variant&intron_variant	.	.	46	1297.72	0.025712	0.0125967	0.821429
Malignant	7	151945204	G	A	p.Ser772Leu	c.2315C>T	KMT2C	missense_variant	29	0	126	3593.63	0.140279	0.0311034	0.926471
Benign	7	151945204	G	A	p.Ser772Leu	c.2315C>T	KMT2C	missense_variant	29	0	37	3447.41	0.144853	0.0287746	0.660714
Malignant	9	79968330	G	T	p.Met2475Ile	c.7425G>T	VPS13A	missense_variant	1	0	117	1110.7	0.030165	0.00911739	0.860294
Benign	9	79968330	G	T	p.Met2475Ile	c.7425G>T	VPS13A	missense_variant	1	0	46	1131.43	0.0369782	0.00990027	0.821429
Malignant	1	237965133	ATT	A	.	c.14091-12_14091-11delTT	RYR2	splice_region_variant&intron_variant	.	.	116	1158	0.0177901	0.00800437	0.852941
Benign	1	237965133	ATT	A	.	c.14091-12_14091-11delTT	RYR2	splice_region_variant&intron_variant	.	.	46	1214.98	0.0185904	0.00938896	0.821429
Malignant	7	140434574	C	CA	p.?	c.2128-5dupT	BRAF	splice_region_variant&intron_variant	2	0	114	1335.36	0.103688	0.0468473	0.838235
Benign	7	140434574	C	CA	p.?	c.2128-5dupT	BRAF	splice_region_variant&intron_variant	2	0	47	1323.74	0.107116	0.0439186	0.839286
Malignant	7	151970951	C	T	p.Arg284Gln	c.851G>A	KMT2C	missense_variant&splice_region_variant	45	2	117	4667.53	0.0255153	0.0155854	0.860294
Benign	7	151970951	C	T	p.Arg284Gln	c.851G>A	KMT2C	missense_variant&splice_region_variant	44	2	44	5100.55	0.0417773	0.0354557	0.785714
Malignant	9	79852900	C	CT	.	c.1596-8dupT	VPS13A	splice_region_variant&intron_variant	.	.	115	991.93	0.0748858	0.0116578	0.845588
Benign	9	79852900	C	CT	.	c.1596-8dupT	VPS13A	splice_region_variant&intron_variant	.	.	46	1032.54	0.0845187	0.012979	0.821429
Malignant	9	79852900	CT	C	.	c.1596-8delT	VPS13A	splice_region_variant&intron_variant	.	.	115	991.93	0.0707228	0.010401	0.845588
Benign	9	79852900	CT	C	.	c.1596-8delT	VPS13A	splice_region_variant&intron_variant	.	.	46	1032.54	0.0707524	0.0113576	0.821429
Malignant	1	237905570	CT	C	.	c.11092-11delT	RYR2	splice_region_variant&intron_variant	.	.	114	1010.77	0.140462	0.0352991	0.838235
Benign	1	237905570	CT	C	.	c.11092-11delT	RYR2	splice_region_variant&intron_variant	.	.	46	1060.37	0.142175	0.0429064	0.821429
Malignant	1	237905570	CTT	C	.	c.11092-12_11092-11delTT	RYR2	splice_region_variant&intron_variant	.	.	114	1010.77	0.0499787	0.0153887	0.838235
Benign	1	237905570	CTT	C	.	c.11092-12_11092-11delTT	RYR2	splice_region_variant&intron_variant	.	.	46	1060.37	0.0502196	0.0176175	0.821429
Malignant	7	151875100	TAAA	T	.	c.7443-8_7443-6delTTT	KMT2C	splice_region_variant&intron_variant	.	.	116	1300.25	0.0247384	0.0118628	0.852941
Benign	7	151875100	TAAA	T	.	c.7443-8_7443-6delTTT	KMT2C	splice_region_variant&intron_variant	.	.	44	1418.75	0.0302462	0.0175755	0.785714
Malignant	7	151962290	C	G	p.Lys339Asn	c.1017G>C	KMT2C	missense_variant	14	0	116	3608.86	0.0256416	0.0196913	0.852941
Benign	7	151962290	C	G	p.Lys339Asn	c.1017G>C	KMT2C	missense_variant	14	0	44	3931.41	0.0428668	0.0383457	0.785714
Malignant	9	79955305	A	AT	.	c.6880-6dupT	VPS13A	splice_region_variant&intron_variant	.	.	114	1513.71	0.0172518	0.00569731	0.838235
Benign	9	79955305	A	AT	.	c.6880-6dupT	VPS13A	splice_region_variant&intron_variant	.	.	46	1657.11	0.0178648	0.0054822	0.821429
Malignant	1	158584103	G	GA	p.?	c.6789-8dupT	SPTA1	splice_region_variant&intron_variant	1	0	116	1391.61	0.0973566	0.0548741	0.852941
Benign	1	158584103	G	GA	p.?	c.6789-8dupT	SPTA1	splice_region_variant&intron_variant	1	0	43	1360.67	0.103548	0.0455202	0.767857
Malignant	1	237965133	A	ATT	.	c.14091-12_14091-11dupTT	RYR2	splice_region_variant&intron_variant	.	.	115	1139.87	0.0527158	0.0423206	0.845588
Benign	1	237965133	A	ATT	.	c.14091-12_14091-11dupTT	RYR2	splice_region_variant&intron_variant	.	.	44	1196.07	0.0541287	0.0298922	0.785714
Malignant	7	151882735	G	A	.	c.5009-19C>T	KMT2C	splice_region_variant&intron_variant	.	.	117	1435.24	0.106882	0.0340706	0.860294
Benign	7	151882735	G	A	.	c.5009-19C>T	KMT2C	splice_region_variant&intron_variant	.	.	42	1440.21	0.125083	0.0568544	0.75
Malignant	7	151962309	G	A	.	c.1013-15C>T	KMT2C	splice_region_variant&intron_variant	.	.	124	2159.85	0.0232232	0.00550331	0.911765
Benign	7	151962309	G	A	.	c.1013-15C>T	KMT2C	splice_region_variant&intron_variant	.	.	35	2167.91	0.0244732	0.00575192	0.625
Malignant	6	70899999	C	CT	.	c.3028-11dupT	COL19A1	splice_region_variant&intron_variant	.	.	114	989.658	0.0234858	0.00555539	0.838235
Benign	6	70899999	C	CT	.	c.3028-11dupT	COL19A1	splice_region_variant&intron_variant	.	.	43	948.163	0.0280852	0.00694428	0.767857
Malignant	1	237905586	A	T	.	c.11092-10A>T	RYR2	splice_region_variant&intron_variant	.	.	110	1097.93	0.0120094	0.00398265	0.808824
Benign	1	237905586	A	T	.	c.11092-10A>T	RYR2	splice_region_variant&intron_variant	.	.	46	1161.67	0.0132771	0.00576758	0.821429
Malignant	9	139396803	A	C	p.Phe1769Val	c.5305T>G	NOTCH1	missense_variant	.	.	111	2122.63	0.00951029	0.00318835	0.816176
Benign	9	139396803	A	C	p.Phe1769Val	c.5305T>G	NOTCH1	missense_variant	.	.	45	2305.82	0.0101912	0.00386647	0.803571
Malignant	3	41268676	GAT	G	.	c.937-10_937-9delAT	CTNNB1	splice_region_variant&intron_variant	.	.	110	956.591	0.0282684	0.007687	0.808824
Benign	3	41268676	GAT	G	.	c.937-10_937-9delAT	CTNNB1	splice_region_variant&intron_variant	.	.	45	951.333	0.0294956	0.00705042	0.803571
Malignant	10	89711855	C	CT	.	c.1012-12dupT	PTEN	splice_region_variant&intron_variant	.	.	107	2235.69	0.00772013	0.00206853	0.786765
Benign	10	89711855	C	CT	.	c.1012-12dupT	PTEN	splice_region_variant&intron_variant	.	.	48	2002.92	0.00881506	0.00318594	0.857143
Malignant	3	41268676	G	GAT	.	c.937-10_937-9dupAT	CTNNB1	splice_region_variant&intron_variant	.	.	109	959.807	0.0168168	0.00548064	0.801471
Benign	3	41268676	G	GAT	.	c.937-10_937-9dupAT	CTNNB1	splice_region_variant&intron_variant	.	.	45	951.333	0.0186642	0.005903	0.803571
Malignant	1	237905570	C	CT	.	c.11092-11dupT	RYR2	splice_region_variant&intron_variant	.	.	108	1024.03	0.0791902	0.0458345	0.794118
Benign	1	237905570	C	CT	.	c.11092-11dupT	RYR2	splice_region_variant&intron_variant	.	.	45	1060.8	0.0782416	0.0428338	0.803571
Malignant	8	113353699	C	A	.	c.6652+7G>T	CSMD3	splice_region_variant&intron_variant	.	.	105	1359.58	0.0106087	0.0052443	0.772059
Benign	8	113353699	C	A	.	c.6652+7G>T	CSMD3	splice_region_variant&intron_variant	.	.	47	1477.7	0.0126946	0.00477761	0.839286
Malignant	8	113516208	T	TA	p.?	c.4896-3_4896-2insT	CSMD3	splice_region_variant&intron_variant	1	0	106	1420.78	0.0324601	0.014524	0.779412
Benign	8	113516208	T	TA	p.?	c.4896-3_4896-2insT	CSMD3	splice_region_variant&intron_variant	1	0	46	1579.48	0.0378612	0.0206413	0.821429
Malignant	8	113516208	TG	T	p.?	c.4896-3delC	CSMD3	splice_region_variant&intron_variant	6	0	106	1420.78	0.0514883	0.0235409	0.779412
Benign	8	113516208	TG	T	p.?	c.4896-3delC	CSMD3	splice_region_variant&intron_variant	6	0	46	1579.48	0.0599022	0.031234	0.821429
Malignant	9	79922845	CT	C	.	c.3961-6delT	VPS13A	splice_region_variant&intron_variant	.	.	109	1104.99	0.028747	0.00985508	0.801471
Benign	9	79922845	CT	C	.	c.3961-6delT	VPS13A	splice_region_variant&intron_variant	.	.	42	1121.1	0.0305669	0.0146711	0.75
Malignant	1	158584103	G	GAAA	.	c.6789-10_6789-8dupTTT	SPTA1	splice_region_variant&intron_variant	.	.	111	1344.81	0.0536881	0.0342806	0.816176
Benign	1	158584103	G	GAAA	.	c.6789-10_6789-8dupTTT	SPTA1	splice_region_variant&intron_variant	.	.	39	1316	0.061488	0.0375495	0.696429
Malignant	5	170837513	CT	C	.	c.847-5delT	NPM1	splice_region_variant&intron_variant	.	.	107	1445.25	0.10207	0.0138966	0.786765
Benign	5	170837513	CT	C	.	c.847-5delT	NPM1	splice_region_variant&intron_variant	.	.	39	1591.64	0.114408	0.0132943	0.696429
Malignant	8	3224788	GGA	G	.	c.2900-21_2900-20delTC	CSMD1	splice_region_variant&intron_variant	.	.	114	2105.39	0.0522484	0.0699287	0.838235
Benign	8	3224788	GGA	G	.	c.2900-21_2900-20delTC	CSMD1	splice_region_variant&intron_variant	.	.	32	2016.22	0.0631658	0.0791537	0.571429
Malignant	6	70916830	AT	A	.	c.3302-11delT	COL19A1	splice_region_variant&intron_variant	.	.	98	2283.39	0.0261185	0.00570374	0.720588
Benign	6	70916830	AT	A	.	c.3302-11delT	COL19A1	splice_region_variant&intron_variant	.	.	47	2456.89	0.0279374	0.00658384	0.839286
Malignant	9	79954410	GT	G	.	c.6379-8delT	VPS13A	splice_region_variant&intron_variant	.	.	110	1367.54	0.0796868	0.0294373	0.808824
Benign	9	79954410	GT	G	.	c.6379-8delT	VPS13A	splice_region_variant&intron_variant	.	.	35	1411.46	0.0861208	0.0315821	0.625
Malignant	1	237819090	ATT	A	.	c.7966-21_7966-20delTT	RYR2	splice_region_variant&intron_variant	.	.	100	1726.85	0.00825227	0.00233737	0.735294
Benign	1	237819090	ATT	A	.	c.7966-21_7966-20delTT	RYR2	splice_region_variant&intron_variant	.	.	44	1808.11	0.00880984	0.00282286	0.785714
Malignant	7	151970859	C	A	p.Gly315Cys	c.943G>T	KMT2C	missense_variant	13	0	106	10001.4	0.0352056	0.0182726	0.779412
Benign	7	151970859	C	A	p.Gly315Cys	c.943G>T	KMT2C	missense_variant	13	0	38	10832.8	0.0420051	0.0182461	0.678571
Malignant	9	79954410	GTT	G	.	c.6379-9_6379-8delTT	VPS13A	splice_region_variant&intron_variant	.	.	110	1367.54	0.0209453	0.00891761	0.808824
Benign	9	79954410	GTT	G	.	c.6379-9_6379-8delTT	VPS13A	splice_region_variant&intron_variant	.	.	34	1401.44	0.023012	0.0102173	0.607143
Malignant	10	89720651	G	T	p.Asp441Tyr	c.1321G>T	PTEN	missense_variant	1	0	99	1432.21	0.00985843	0.00411404	0.727941
Benign	10	89720651	G	T	p.Asp441Tyr	c.1321G>T	PTEN	missense_variant	1	0	45	1367.69	0.00933921	0.00346781	0.803571
Malignant	1	237905570	C	CTT	.	c.11092-12_11092-11dupTT	RYR2	splice_region_variant&intron_variant	.	.	104	1035.32	0.0155407	0.0108367	0.764706
Benign	1	237905570	C	CTT	.	c.11092-12_11092-11dupTT	RYR2	splice_region_variant&intron_variant	.	.	39	1077.44	0.0187328	0.0112615	0.696429
Malignant	9	79954410	G	GT	.	c.6379-8dupT	VPS13A	splice_region_variant&intron_variant	.	.	108	1362.36	0.0935692	0.034771	0.794118
Benign	9	79954410	G	GT	.	c.6379-8dupT	VPS13A	splice_region_variant&intron_variant	.	.	35	1411.46	0.112783	0.043591	0.625
Malignant	9	79827867	G	GT	.	c.556-10dupT	VPS13A	splice_region_variant&intron_variant	.	.	96	1460.34	0.00840701	0.00288674	0.705882
Benign	9	79827867	G	GT	.	c.556-10dupT	VPS13A	splice_region_variant&intron_variant	.	.	45	1451.76	0.00888921	0.00292875	0.803571
Malignant	9	79834841	G	GT	.	c.755-21dupT	VPS13A	splice_region_variant&intron_variant	.	.	102	1552.94	0.00812911	0.00266418	0.75
Benign	9	79834841	G	GT	.	c.755-21dupT	VPS13A	splice_region_variant&intron_variant	.	.	39	1574.26	0.00774007	0.00230062	0.696429
Malignant	1	120611960	C	T	p.Ala21Thr	c.61G>A	NOTCH2	missense_variant	43	1	107	5561.57	0.123469	0.0414685	0.786765
Benign	1	120611960	C	T	p.Ala21Thr	c.61G>A	NOTCH2	missense_variant	43	1	33	4548.67	0.126134	0.0528927	0.589286
Malignant	2	80136693	TTG	T	.	c.853-12_853-11delTG	CTNNA2	splice_region_variant&intron_variant	.	.	107	3440.79	0.025196	0.0034619	0.786765
Benign	2	80136693	TTG	T	.	c.853-12_853-11delTG	CTNNA2	splice_region_variant&intron_variant	.	.	33	2939.58	0.0270336	0.0050493	0.589286
Malignant	11	1016604	A	G	p.Val2066Ala	c.6197T>C	MUC6	missense_variant	17	0	107	3324.95	0.138462	0.0361417	0.786765
Benign	11	1016604	A	G	p.Val2066Ala	c.6197T>C	MUC6	missense_variant	17	0	33	3244.64	0.152092	0.0241054	0.589286
Malignant	11	1016605	C	G	p.Val2066Leu	c.6196G>C	MUC6	missense_variant	16	0	107	3340.73	0.133931	0.0338242	0.786765
Benign	11	1016605	C	G	p.Val2066Leu	c.6196G>C	MUC6	missense_variant	16	0	33	3261.94	0.147377	0.0222017	0.589286
Malignant	11	1016795	C	G	p.Gln2002His	c.6006G>C	MUC6	missense_variant	17	0	107	20328.8	0.0593015	0.00980895	0.786765
Benign	11	1016795	C	G	p.Gln2002His	c.6006G>C	MUC6	missense_variant	17	0	33	19436.5	0.06076	0.00957901	0.589286
Malignant	11	1016809	G	T	p.Pro1998Thr	c.5992C>A	MUC6	missense_variant	.	.	107	21600.3	0.0423368	0.0091598	0.786765
Benign	11	1016809	G	T	p.Pro1998Thr	c.5992C>A	MUC6	missense_variant	.	.	33	20697.4	0.0461335	0.00613624	0.589286
Malignant	11	1016818	A	G	p.Tyr1995His	c.5983T>C	MUC6	missense_variant	6	0	107	21775.8	0.0537834	0.00715021	0.786765
Benign	11	1016818	A	G	p.Tyr1995His	c.5983T>C	MUC6	missense_variant	6	0	33	20887.5	0.0548049	0.00624314	0.589286
Malignant	11	1016833	G	T	p.Gln1990Lys	c.5968C>A	MUC6	missense_variant	1	0	107	22111.6	0.0536484	0.011417	0.786765
Benign	11	1016833	G	T	p.Gln1990Lys	c.5968C>A	MUC6	missense_variant	1	0	33	21215	0.0614905	0.00655544	0.589286
Malignant	11	1016842	T	G	p.Thr1987Pro	c.5959A>C	MUC6	missense_variant	16	0	107	21634.5	0.0620469	0.00899591	0.786765
Benign	11	1016842	T	G	p.Thr1987Pro	c.5959A>C	MUC6	missense_variant	16	0	33	20743.5	0.0636058	0.00719465	0.589286
Malignant	11	1016849	C	G	p.Met1984Ile	c.5952G>C	MUC6	missense_variant	1	0	107	20857	0.0359054	0.00940044	0.786765
Benign	11	1016849	C	G	p.Met1984Ile	c.5952G>C	MUC6	missense_variant	1	0	33	19966.7	0.0369106	0.00873075	0.589286
Malignant	11	1016851	T	C	p.Met1984Val	c.5950A>G	MUC6	missense_variant	1	0	107	20796.7	0.0367037	0.00936426	0.786765
Benign	11	1016851	T	C	p.Met1984Val	c.5950A>G	MUC6	missense_variant	1	0	33	19912.2	0.0381315	0.00876481	0.589286
Malignant	11	1016869	A	C	p.Phe1978Val	c.5932T>G	MUC6	missense_variant	.	.	107	19157.1	0.0495445	0.00783701	0.786765
Benign	11	1016869	A	C	p.Phe1978Val	c.5932T>G	MUC6	missense_variant	.	.	33	18401.5	0.0538574	0.00492563	0.589286
Malignant	11	1016871	G	T	p.Pro1977His	c.5930C>A	MUC6	missense_variant	1	0	107	19169.7	0.0261339	0.00349284	0.786765
Benign	11	1016871	G	T	p.Pro1977His	c.5930C>A	MUC6	missense_variant	1	0	33	18397.1	0.0278279	0.00334104	0.589286
Malignant	11	1016889	G	A	p.Pro1971Leu	c.5912C>T	MUC6	missense_variant	10	0	107	17292	0.0235111	0.0037606	0.786765
Benign	11	1016889	G	A	p.Pro1971Leu	c.5912C>T	MUC6	missense_variant	10	0	33	16589.5	0.0245794	0.00284016	0.589286
Malignant	11	1016890	G	A	p.Pro1971Ser	c.5911C>T	MUC6	missense_variant	23	0	107	17186.1	0.101054	0.0191732	0.786765
Benign	11	1016890	G	A	p.Pro1971Ser	c.5911C>T	MUC6	missense_variant	23	0	33	16486.9	0.101589	0.0196836	0.589286
Malignant	11	1016892	G	A	p.Ser1970Phe	c.5909C>T	MUC6	missense_variant	3	0	107	16945.5	0.0210797	0.00332861	0.786765
Benign	11	1016892	G	A	p.Ser1970Phe	c.5909C>T	MUC6	missense_variant	3	0	33	16248.2	0.0236027	0.00348374	0.589286
Malignant	11	1016914	G	T	p.Pro1963Thr	c.5887C>A	MUC6	missense_variant	10	0	107	15520.6	0.0861568	0.017486	0.786765
Benign	11	1016914	G	T	p.Pro1963Thr	c.5887C>A	MUC6	missense_variant	10	0	33	14758.2	0.0998805	0.0142962	0.589286
Malignant	11	1016919	C	T	p.Arg1961Lys	c.5882G>A	MUC6	missense_variant	18	0	107	15264.2	0.092479	0.0128777	0.786765
Benign	11	1016919	C	T	p.Arg1961Lys	c.5882G>A	MUC6	missense_variant	18	0	33	14506.2	0.0913081	0.0131402	0.589286
Malignant	11	1017069	G	A	p.Thr1911Met	c.5732C>T	MUC6	missense_variant	25	0	107	13041.7	0.115577	0.0139111	0.786765
Benign	11	1017069	G	A	p.Thr1911Met	c.5732C>T	MUC6	missense_variant	25	0	33	12095.5	0.118933	0.0120067	0.589286
Malignant	11	1017084	G	A	p.Pro1906Leu	c.5717C>T	MUC6	missense_variant	30	0	107	13313.7	0.148377	0.0171175	0.786765
Benign	11	1017084	G	A	p.Pro1906Leu	c.5717C>T	MUC6	missense_variant	30	0	33	12366.3	0.151711	0.0133823	0.589286
Malignant	11	1017088	A	C	p.Ser1905Ala	c.5713T>G	MUC6	missense_variant	9	0	107	13276.5	0.0593264	0.0178603	0.786765
Benign	11	1017088	A	C	p.Ser1905Ala	c.5713T>G	MUC6	missense_variant	9	0	33	12338.8	0.0659443	0.0163718	0.589286
Malignant	11	1017114	G	A	p.Thr1896Ile	c.5687C>T	MUC6	missense_variant	1	0	107	13398.7	0.0390014	0.00685458	0.786765
Benign	11	1017114	G	A	p.Thr1896Ile	c.5687C>T	MUC6	missense_variant	1	0	33	12516.9	0.0407566	0.00447932	0.589286
Malignant	11	1017135	G	A	p.Thr1889Ile	c.5666C>T	MUC6	missense_variant	21	0	107	13818.4	0.0427533	0.00743434	0.786765
Benign	11	1017135	G	A	p.Thr1889Ile	c.5666C>T	MUC6	missense_variant	21	0	33	12836.5	0.0462751	0.00688393	0.589286
Malignant	11	1017152	G	C	p.Ile1883Met	c.5649C>G	MUC6	missense_variant	1	0	107	13318.2	0.0454193	0.00846266	0.786765
Benign	11	1017152	G	C	p.Ile1883Met	c.5649C>G	MUC6	missense_variant	1	0	33	12383.7	0.0479322	0.00570157	0.589286
Malignant	11	1017154	T	G	p.Ile1883Leu	c.5647A>C	MUC6	missense_variant	9	0	107	13198	0.104668	0.0242279	0.786765
Benign	11	1017154	T	G	p.Ile1883Leu	c.5647A>C	MUC6	missense_variant	9	0	33	12273.4	0.113242	0.0200823	0.589286
Malignant	11	1017183	G	T	p.Pro1873Gln	c.5618C>A	MUC6	missense_variant	41	0	107	12075.6	0.11633	0.0155132	0.786765
Benign	11	1017183	G	T	p.Pro1873Gln	c.5618C>A	MUC6	missense_variant	41	0	33	11205.5	0.11813	0.01341	0.589286
Malignant	11	1017211	C	T	p.Ala1864Thr	c.5590G>A	MUC6	missense_variant	1	0	107	9713.46	0.0471997	0.00939936	0.786765
Benign	11	1017211	C	T	p.Ala1864Thr	c.5590G>A	MUC6	missense_variant	1	0	33	8978.76	0.0496428	0.00707145	0.589286
Malignant	11	1017529	G	A	p.His1758Tyr	c.5272C>T	MUC6	missense_variant	26	0	107	11012.9	0.0665582	0.0138675	0.786765
Benign	11	1017529	G	A	p.His1758Tyr	c.5272C>T	MUC6	missense_variant	26	0	33	10026.5	0.071936	0.0100413	0.589286
Malignant	11	1017543	G	A	p.Thr1753Ile	c.5258C>T	MUC6	missense_variant	2	0	107	10609.3	0.0581312	0.0152401	0.786765
Benign	11	1017543	G	A	p.Thr1753Ile	c.5258C>T	MUC6	missense_variant	2	0	33	9654.82	0.0608637	0.0129084	0.589286
Malignant	1	237619875	AT	A	.	c.1477-11delT	RYR2	splice_region_variant&intron_variant	.	.	102	1947.34	0.0747864	0.0474141	0.75
Benign	1	237619875	AT	A	.	c.1477-11delT	RYR2	splice_region_variant&intron_variant	.	.	37	2069	0.0801553	0.0493544	0.660714
Malignant	7	151875100	T	A	.	c.7443-5A>T	KMT2C	splice_region_variant&intron_variant	.	.	98	1333.96	0.0119026	0.00509481	0.720588
Benign	7	151875100	T	A	.	c.7443-5A>T	KMT2C	splice_region_variant&intron_variant	.	.	41	1421.49	0.0132379	0.00566978	0.732143
Malignant	11	1016581	T	C	p.Thr2074Ala	c.6220A>G	MUC6	missense_variant	1	0	106	2997.01	0.0708548	0.0279397	0.779412
Benign	11	1016581	T	C	p.Thr2074Ala	c.6220A>G	MUC6	missense_variant	1	0	33	2768.48	0.0754627	0.0211389	0.589286
Malignant	11	1016800	G	A	p.Pro2001Ser	c.6001C>T	MUC6	missense_variant	12	0	106	20905.8	0.0696163	0.0141471	0.779412
Benign	11	1016800	G	A	p.Pro2001Ser	c.6001C>T	MUC6	missense_variant	12	0	33	19893.5	0.0748816	0.0099446	0.589286
Malignant	11	1016910	G	A	p.Thr1964Ile	c.5891C>T	MUC6	missense_variant	24	0	106	15807.6	0.171318	0.0294215	0.779412
Benign	11	1016910	G	A	p.Thr1964Ile	c.5891C>T	MUC6	missense_variant	24	0	33	15012.1	0.165198	0.0202229	0.589286
Malignant	11	1016976	T	G	p.His1942Pro	c.5825A>C	MUC6	missense_variant	10	0	106	13617.6	0.0276716	0.0123346	0.779412
Benign	11	1016976	T	G	p.His1942Pro	c.5825A>C	MUC6	missense_variant	10	0	33	12559.9	0.0374106	0.00908012	0.589286
Malignant	11	1017085	G	A	p.Pro1906Ser	c.5716C>T	MUC6	missense_variant	.	.	106	13433.4	0.0262086	0.00444546	0.779412
Benign	11	1017085	G	A	p.Pro1906Ser	c.5716C>T	MUC6	missense_variant	.	.	33	12426.2	0.0272919	0.00345967	0.589286
Malignant	21	10959811	C	CA	.	c.174-12dupT	TPTE	splice_region_variant&intron_variant	.	.	107	3537.19	0.0202093	0.00461464	0.786765
Benign	21	10959811	C	CA	.	c.174-12dupT	TPTE	splice_region_variant&intron_variant	.	.	32	3171.28	0.0209201	0.00567049	0.571429
Malignant	1	27023774	A	C	p.Thr294Pro	c.880A>C	ARID1A	missense_variant	1	0	107	2565.9	0.0195425	0.00565847	0.786765
Benign	1	27023774	A	C	p.Thr294Pro	c.880A>C	ARID1A	missense_variant	1	0	31	2025.68	0.0194963	0.00342449	0.553571
Malignant	9	79895059	A	T	.	c.2825-16A>T	VPS13A	splice_region_variant&intron_variant	.	.	97	1058.93	0.0119052	0.00602591	0.713235
Benign	9	79895059	A	T	.	c.2825-16A>T	VPS13A	splice_region_variant&intron_variant	.	.	41	1106.41	0.0107828	0.00535741	0.732143
Malignant	11	1016609	C	G	p.Met2064Ile	c.6192G>C	MUC6	missense_variant	32	0	105	4165.72	0.0486565	0.0224556	0.772059
Benign	11	1016609	C	G	p.Met2064Ile	c.6192G>C	MUC6	missense_variant	32	0	33	4038.27	0.0681002	0.0167978	0.589286
Malignant	11	1016845	C	G	p.Ala1986Pro	c.5956G>C	MUC6	missense_variant	.	.	105	21831.6	0.0185106	0.003609	0.772059
Benign	11	1016845	C	G	p.Ala1986Pro	c.5956G>C	MUC6	missense_variant	.	.	33	20712	0.0199116	0.00317628	0.589286
Malignant	11	1016856	C	G	p.Gly1982Ala	c.5945G>C	MUC6	missense_variant	.	.	105	20360.8	0.0172959	0.00716847	0.772059
Benign	11	1016856	C	G	p.Gly1982Ala	c.5945G>C	MUC6	missense_variant	.	.	33	19466	0.0175881	0.00703734	0.589286
Malignant	11	1016863	A	G	p.Ser1980Pro	c.5938T>C	MUC6	missense_variant	.	.	105	20088.3	0.0154543	0.00307995	0.772059
Benign	11	1016863	A	G	p.Ser1980Pro	c.5938T>C	MUC6	missense_variant	.	.	33	19031.8	0.0166467	0.00269416	0.589286
Malignant	11	1016978	T	G	p.Lys1941Asn	c.5823A>C	MUC6	missense_variant	23	0	105	13752.4	0.186031	0.0340343	0.772059
Benign	11	1016978	T	G	p.Lys1941Asn	c.5823A>C	MUC6	missense_variant	23	0	33	12676.7	0.184002	0.0263454	0.589286
Malignant	11	1016991	T	G	p.Asn1937Thr	c.5810A>C	MUC6	missense_variant	25	0	105	13642.2	0.177923	0.0355439	0.772059
Benign	11	1016991	T	G	p.Asn1937Thr	c.5810A>C	MUC6	missense_variant	25	0	33	12605.1	0.175115	0.0295214	0.589286
Malignant	11	1017169	G	A	p.Pro1878Ser	c.5632C>T	MUC6	missense_variant	6	0	105	12934	0.0182271	0.00525043	0.772059
Benign	11	1017169	G	A	p.Pro1878Ser	c.5632C>T	MUC6	missense_variant	6	0	33	11889.9	0.0214893	0.00485019	0.589286
Malignant	11	1017426	C	T	p.Arg1792Lys	c.5375G>A	MUC6	missense_variant	.	.	105	12306.4	0.0176494	0.00426758	0.772059
Benign	11	1017426	C	T	p.Arg1792Lys	c.5375G>A	MUC6	missense_variant	.	.	33	11510.6	0.0199032	0.00373549	0.589286
Malignant	1	158584103	G	GAA	.	c.6789-9_6789-8dupTT	SPTA1	splice_region_variant&intron_variant	.	.	96	1395	0.117006	0.0652492	0.705882
Benign	1	158584103	G	GAA	.	c.6789-9_6789-8dupTT	SPTA1	splice_region_variant&intron_variant	.	.	41	1361.93	0.12425	0.0735085	0.732143
Malignant	7	116397478	G	GT	.	c.1863-5dupT	MET	splice_region_variant&intron_variant	.	.	106	2593.74	0.00890836	0.00274618	0.779412
Benign	7	116397478	G	GT	.	c.1863-5dupT	MET	splice_region_variant&intron_variant	.	.	31	2418.68	0.00930315	0.0029334	0.553571
Malignant	7	151919690	C	T	p.Ser1134Asn	c.3401G>A	KMT2C	missense_variant	2	0	97	1456.43	0.00968667	0.00491342	0.713235
Benign	7	151919690	C	T	p.Ser1134Asn	c.3401G>A	KMT2C	missense_variant	2	0	40	1544.97	0.0103793	0.00499765	0.714286
Malignant	11	1016576	G	C	p.His2075Gln	c.6225C>G	MUC6	missense_variant	2	0	104	2973.38	0.0295476	0.0124356	0.764706
Benign	11	1016576	G	C	p.His2075Gln	c.6225C>G	MUC6	missense_variant	2	0	33	2722.3	0.0341122	0.0105578	0.589286
Malignant	11	1016779	G	A	p.His2008Tyr	c.6022C>T	MUC6	missense_variant	1	0	104	18746.3	0.0427214	0.00541163	0.764706
Benign	11	1016779	G	A	p.His2008Tyr	c.6022C>T	MUC6	missense_variant	1	0	33	17591.5	0.0451551	0.00444006	0.589286
Malignant	11	1016785	G	T	p.Pro2006Thr	c.6016C>A	MUC6	missense_variant	.	.	104	19556	0.0383766	0.00495291	0.764706
Benign	11	1016785	G	T	p.Pro2006Thr	c.6016C>A	MUC6	missense_variant	.	.	33	18343.3	0.0419407	0.0052403	0.589286
Malignant	11	1016801	G	C	p.His2000Gln	c.6000C>G	MUC6	missense_variant	.	.	104	21197.2	0.0244319	0.00669961	0.764706
Benign	11	1016801	G	C	p.His2000Gln	c.6000C>G	MUC6	missense_variant	.	.	33	19939.4	0.0259793	0.00567807	0.589286
Malignant	11	1016802	T	A	p.His2000Leu	c.5999A>T	MUC6	missense_variant	.	.	104	21254.4	0.0387345	0.0047113	0.764706
Benign	11	1016802	T	A	p.His2000Leu	c.5999A>T	MUC6	missense_variant	.	.	33	19999.1	0.0414352	0.00407921	0.589286
Malignant	11	1016836	A	T	p.Phe1989Ile	c.5965T>A	MUC6	missense_variant	.	.	104	22362.4	0.0368086	0.00630248	0.764706
Benign	11	1016836	A	T	p.Phe1989Ile	c.5965T>A	MUC6	missense_variant	.	.	33	21086.2	0.042144	0.0050796	0.589286
Malignant	11	1016869	A	G	p.Phe1978Leu	c.5932T>C	MUC6	missense_variant	.	.	104	19499.5	0.0129597	0.00250963	0.764706
Benign	11	1016869	A	G	p.Phe1978Leu	c.5932T>C	MUC6	missense_variant	.	.	33	18401.5	0.0140288	0.0023118	0.589286
Malignant	11	1016887	G	A	p.Pro1972Ser	c.5914C>T	MUC6	missense_variant	.	.	104	17761.1	0.0185006	0.00252902	0.764706
Benign	11	1016887	G	A	p.Pro1972Ser	c.5914C>T	MUC6	missense_variant	.	.	33	16732.9	0.0205437	0.0026767	0.589286
Malignant	11	1016908	G	T	p.Pro1965Thr	c.5893C>A	MUC6	missense_variant	1	0	104	16300.5	0.0125833	0.00280719	0.764706
Benign	11	1016908	G	T	p.Pro1965Thr	c.5893C>A	MUC6	missense_variant	1	0	33	15232.5	0.0145788	0.00291359	0.589286
Malignant	11	1017072	C	T	p.Ser1910Asn	c.5729G>A	MUC6	missense_variant	.	.	104	13304.4	0.0120358	0.00237868	0.764706
Benign	11	1017072	C	T	p.Ser1910Asn	c.5729G>A	MUC6	missense_variant	.	.	33	12136.4	0.0126086	0.00207822	0.589286
Malignant	11	1017162	G	A	p.Pro1880Leu	c.5639C>T	MUC6	missense_variant	3	0	104	13231.7	0.0141376	0.00337683	0.764706
Benign	11	1017162	G	A	p.Pro1880Leu	c.5639C>T	MUC6	missense_variant	3	0	33	12110.6	0.0137735	0.00290523	0.589286
Malignant	11	1017186	A	G	p.Met1872Thr	c.5615T>C	MUC6	missense_variant	30	0	104	11993.1	0.0488626	0.0155714	0.764706
Benign	11	1017186	A	G	p.Met1872Thr	c.5615T>C	MUC6	missense_variant	30	0	33	10956.3	0.0544226	0.0143813	0.589286
Malignant	11	1017483	T	G	p.His1773Pro	c.5318A>C	MUC6	missense_variant	18	0	104	13605.7	0.0251446	0.0134964	0.764706
Benign	11	1017483	T	G	p.His1773Pro	c.5318A>C	MUC6	missense_variant	18	0	33	12201.4	0.0339206	0.0147895	0.589286
Malignant	11	1017573	G	C	p.Ala1743Gly	c.5228C>G	MUC6	missense_variant	10	0	104	9883.34	0.0207492	0.0053397	0.764706
Benign	11	1017573	G	C	p.Ala1743Gly	c.5228C>G	MUC6	missense_variant	10	0	33	8773.21	0.023006	0.0045738	0.589286
Malignant	11	1017591	C	G	p.Arg1737Pro	c.5210G>C	MUC6	missense_variant	13	0	104	9096.93	0.0283077	0.00689798	0.764706
Benign	11	1017591	C	G	p.Arg1737Pro	c.5210G>C	MUC6	missense_variant	13	0	33	8039.55	0.0319081	0.00511757	0.589286
Malignant	12	43826277	TA	T	p.?	c.2932-7delT	ADAMTS20	splice_region_variant&intron_variant	5	0	106	2329.09	0.0355634	0.0180137	0.779412
Benign	12	43826277	TA	T	p.?	c.2932-7delT	ADAMTS20	splice_region_variant&intron_variant	5	0	31	2112.58	0.0343605	0.0197908	0.553571
Malignant	1	27023762	A	C	p.Thr290Pro	c.868A>C	ARID1A	missense_variant	.	.	105	2529.5	0.0144443	0.00485728	0.772059
Benign	1	27023762	A	C	p.Thr290Pro	c.868A>C	ARID1A	missense_variant	.	.	31	1998.97	0.0139491	0.00386818	0.553571
Malignant	1	158637865	GAAA	G	.	c.1834-16_1834-14delTTT	SPTA1	splice_region_variant&intron_variant	.	.	94	1287.68	0.120785	0.0758171	0.691176
Benign	1	158637865	GAAA	G	.	c.1834-16_1834-14delTTT	SPTA1	splice_region_variant&intron_variant	.	.	42	1376.9	0.120417	0.0829314	0.75
Malignant	7	32249155	G	GA	.	c.86-5dupT	PDE1C	splice_region_variant&intron_variant	.	.	105	1906.04	0.0504397	0.00711884	0.772059
Benign	7	32249155	G	GA	.	c.86-5dupT	PDE1C	splice_region_variant&intron_variant	.	.	31	1765	0.0526505	0.00851428	0.553571
Malignant	7	32249155	GA	G	.	c.86-5delT	PDE1C	splice_region_variant&intron_variant	.	.	105	1906.04	0.0213867	0.00405787	0.772059
Benign	7	32249155	GA	G	.	c.86-5delT	PDE1C	splice_region_variant&intron_variant	.	.	31	1765	0.0231468	0.00480377	0.553571
Malignant	11	1016577	T	G	p.His2075Pro	c.6224A>C	MUC6	missense_variant	1	0	103	2965.9	0.0274331	0.0119196	0.757353
Benign	11	1016577	T	G	p.His2075Pro	c.6224A>C	MUC6	missense_variant	1	0	33	2719.85	0.0327296	0.00962749	0.589286
Malignant	21	10959811	CA	C	.	c.174-12delT	TPTE	splice_region_variant&intron_variant	.	.	104	3573.05	0.0441048	0.0578595	0.764706
Benign	21	10959811	CA	C	.	c.174-12delT	TPTE	splice_region_variant&intron_variant	.	.	32	3171.28	0.039897	0.049806	0.571429
Malignant	1	158584116	C	A	.	c.6789-20G>T	SPTA1	splice_region_variant&intron_variant	.	.	95	1280.53	0.010711	0.00417914	0.698529
Benign	1	158584116	C	A	.	c.6789-20G>T	SPTA1	splice_region_variant&intron_variant	.	.	40	1259.97	0.0112215	0.00454999	0.714286
Malignant	7	116409675	CT	C	.	c.2638-9delT	MET	splice_region_variant&intron_variant	.	.	99	1602.78	0.135085	0.0176979	0.727941
Benign	7	116409675	CT	C	.	c.2638-9delT	MET	splice_region_variant&intron_variant	.	.	36	1733.56	0.149028	0.0141808	0.642857
Malignant	11	1016916	A	G	p.Leu1962Pro	c.5885T>C	MUC6	missense_variant	6	0	102	15574	0.021154	0.00938743	0.75
Benign	11	1016916	A	G	p.Leu1962Pro	c.5885T>C	MUC6	missense_variant	6	0	33	14516.1	0.0298839	0.00612058	0.589286
Malignant	11	1016957	T	G	p.Arg1948Ser	c.5844A>C	MUC6	missense_variant	1	0	102	14668.4	0.0287849	0.0132173	0.75
Benign	11	1016957	T	G	p.Arg1948Ser	c.5844A>C	MUC6	missense_variant	1	0	33	13544	0.0410002	0.0118485	0.589286
Malignant	11	1017036	G	A	p.Thr1922Ile	c.5765C>T	MUC6	missense_variant	25	0	102	12404.1	0.171713	0.0391647	0.75
Benign	11	1017036	G	A	p.Thr1922Ile	c.5765C>T	MUC6	missense_variant	25	0	33	11578.9	0.173811	0.036814	0.589286
Malignant	11	1017466	T	C	p.Arg1779Gly	c.5335A>G	MUC6	missense_variant	6	0	102	13956.3	0.0188697	0.00940938	0.75
Benign	11	1017466	T	C	p.Arg1779Gly	c.5335A>G	MUC6	missense_variant	6	0	33	12530	0.0253618	0.011229	0.589286
Malignant	12	43826277	T	TAA	.	c.2932-8_2932-7dupTT	ADAMTS20	splice_region_variant&intron_variant	.	.	105	2337.3	0.0496798	0.0246798	0.772059
Benign	12	43826277	T	TAA	.	c.2932-8_2932-7dupTT	ADAMTS20	splice_region_variant&intron_variant	.	.	30	2152.6	0.052741	0.0238809	0.535714
Malignant	2	141272360	G	GA	.	c.8150-20dupT	LRP1B	splice_region_variant&intron_variant	.	.	104	2410.44	0.0725306	0.06447	0.764706
Benign	2	141272360	G	GA	.	c.8150-20dupT	LRP1B	splice_region_variant&intron_variant	.	.	30	2183.9	0.0720241	0.0586012	0.535714
Malignant	6	70899999	CT	C	.	c.3028-11delT	COL19A1	splice_region_variant&intron_variant	.	.	97	1026.58	0.00974041	0.0034277	0.713235
Benign	6	70899999	CT	C	.	c.3028-11delT	COL19A1	splice_region_variant&intron_variant	.	.	37	963.108	0.0112708	0.00360579	0.660714
Malignant	7	11418826	C	T	p.Val1558Met	c.4672G>A	THSD7A	missense_variant	.	.	102	2478.04	0.0187529	0.00541611	0.75
Benign	7	11418826	C	T	p.Val1558Met	c.4672G>A	THSD7A	missense_variant	.	.	32	2329.03	0.0156084	0.0060731	0.571429
Malignant	11	1016835	A	G	p.Phe1989Ser	c.5966T>C	MUC6	missense_variant	4	0	102	21700.3	0.0362181	0.0142451	0.75
Benign	11	1016835	A	G	p.Phe1989Ser	c.5966T>C	MUC6	missense_variant	4	0	32	21107.1	0.0393094	0.0142215	0.571429
Malignant	11	1016959	T	C	p.Arg1948Gly	c.5842A>G	MUC6	missense_variant	1	0	101	14640.8	0.019065	0.00765655	0.742647
Benign	11	1016959	T	C	p.Arg1948Gly	c.5842A>G	MUC6	missense_variant	1	0	33	13567.2	0.0250307	0.00557751	0.589286
Malignant	11	1017514	A	G	p.Ser1763Pro	c.5287T>C	MUC6	missense_variant	34	0	104	11799.5	0.193137	0.0338574	0.764706
Benign	11	1017514	A	G	p.Ser1763Pro	c.5287T>C	MUC6	missense_variant	34	0	30	10750.1	0.208218	0.022348	0.535714
Malignant	11	1017654	G	A	p.Pro1716Leu	c.5147C>T	MUC6	missense_variant	1	0	103	5970.5	0.0119663	0.00449236	0.757353
Benign	11	1017654	G	A	p.Pro1716Leu	c.5147C>T	MUC6	missense_variant	1	0	31	5394.77	0.0119922	0.00507962	0.553571
Malignant	2	141598473	A	T	.	c.5114+14T>A	LRP1B	splice_region_variant&intron_variant	.	.	102	1666.48	0.0490759	0.00840875	0.75
Benign	2	141598473	A	T	.	c.5114+14T>A	LRP1B	splice_region_variant&intron_variant	.	.	31	1505.23	0.0500839	0.0134059	0.553571
Malignant	2	212578379	T	TA	p.?	c.884-7dupT	ERBB4	splice_region_variant&intron_variant	2	0	102	1662.9	0.056299	0.0185502	0.75
Benign	2	212578379	T	TA	p.?	c.884-7dupT	ERBB4	splice_region_variant&intron_variant	2	0	31	1482.1	0.0545869	0.0229874	0.553571
Malignant	2	212578379	TAA	T	.	c.884-8_884-7delTT	ERBB4	splice_region_variant&intron_variant	.	.	102	1662.9	0.0358505	0.0185519	0.75
Benign	2	212578379	TAA	T	.	c.884-8_884-7delTT	ERBB4	splice_region_variant&intron_variant	.	.	31	1482.1	0.0397363	0.0217784	0.553571
Malignant	8	51314749	G	GT	.	c.28-10dupT	SNTG1	splice_region_variant&intron_variant	.	.	102	1758.8	0.0800038	0.00985735	0.75
Benign	8	51314749	G	GT	.	c.28-10dupT	SNTG1	splice_region_variant&intron_variant	.	.	31	1565.03	0.0820961	0.00769233	0.553571
Malignant	8	51314749	GT	G	.	c.28-10delT	SNTG1	splice_region_variant&intron_variant	.	.	102	1758.8	0.0698079	0.00781963	0.75
Benign	8	51314749	GT	G	.	c.28-10delT	SNTG1	splice_region_variant&intron_variant	.	.	31	1565.03	0.0757946	0.0099999	0.553571
Malignant	11	1016880	C	T	p.Gly1974Glu	c.5921G>A	MUC6	missense_variant	1	0	100	18871.6	0.00790862	0.00130038	0.735294
Benign	11	1016880	C	T	p.Gly1974Glu	c.5921G>A	MUC6	missense_variant	1	0	33	17871.5	0.00834591	0.00160205	0.589286
Malignant	1	182812425	A	T	p.?	c.112-4A>T	DHX9	splice_region_variant&intron_variant	10	0	102	2057.34	0.0209563	0.00448208	0.75
Benign	1	182812425	A	T	p.?	c.112-4A>T	DHX9	splice_region_variant&intron_variant	10	0	30	1835.43	0.0221844	0.00697189	0.535714
Malignant	2	141294285	G	GA	p.?	c.7514-8dupT	LRP1B	splice_region_variant&intron_variant	1	0	102	1708.94	0.0701553	0.0104932	0.75
Benign	2	141294285	G	GA	p.?	c.7514-8dupT	LRP1B	splice_region_variant&intron_variant	1	0	30	1484.27	0.0665723	0.0144255	0.535714
Malignant	2	141294285	GA	G	p.?	c.7514-8delT	LRP1B	splice_region_variant&intron_variant	5	0	102	1708.94	0.0783516	0.0167606	0.75
Benign	2	141294285	GA	G	p.?	c.7514-8delT	LRP1B	splice_region_variant&intron_variant	5	0	30	1484.27	0.0818111	0.0304498	0.535714
Malignant	2	141294285	GAA	G	.	c.7514-9_7514-8delTT	LRP1B	splice_region_variant&intron_variant	.	.	102	1708.94	0.020663	0.00472699	0.75
Benign	2	141294285	GAA	G	.	c.7514-9_7514-8delTT	LRP1B	splice_region_variant&intron_variant	.	.	30	1484.27	0.0224851	0.00573585	0.535714
Malignant	1	182812410	C	CT	.	c.112-5dupT	DHX9	splice_region_variant&intron_variant	.	.	102	1888.71	0.0744112	0.00852992	0.75
Benign	1	182812410	C	CT	.	c.112-5dupT	DHX9	splice_region_variant&intron_variant	.	.	29	1710.38	0.0734954	0.00883328	0.517857
Malignant	1	182812410	CT	C	.	c.112-5delT	DHX9	splice_region_variant&intron_variant	.	.	102	1888.71	0.13496	0.00964654	0.75
Benign	1	182812410	CT	C	.	c.112-5delT	DHX9	splice_region_variant&intron_variant	.	.	29	1710.38	0.13788	0.0104117	0.517857
Malignant	1	182812410	CTT	C	.	c.112-6_112-5delTT	DHX9	splice_region_variant&intron_variant	.	.	102	1888.71	0.029668	0.00526246	0.75
Benign	1	182812410	CTT	C	.	c.112-6_112-5delTT	DHX9	splice_region_variant&intron_variant	.	.	29	1710.38	0.0297793	0.00516666	0.517857
Malignant	2	141625834	T	TA	.	c.4170-3dupT	LRP1B	splice_region_variant&intron_variant	.	.	103	1872.8	0.0595277	0.0117332	0.757353
Benign	2	141625834	T	TA	.	c.4170-3dupT	LRP1B	splice_region_variant&intron_variant	.	.	28	1675.5	0.0647488	0.00845545	0.5
Malignant	2	141625834	TA	T	p.?	c.4170-3delT	LRP1B	splice_region_variant&intron_variant	2	1	103	1872.8	0.111219	0.0172338	0.757353
Benign	2	141625834	TA	T	p.?	c.4170-3delT	LRP1B	splice_region_variant&intron_variant	2	1	28	1675.5	0.110596	0.0142224	0.5
Malignant	2	141625834	TAA	T	p.?	c.4170-4_4170-3delTT	LRP1B	splice_region_variant&intron_variant	2	1	103	1872.8	0.0402614	0.0117164	0.757353
Benign	2	141625834	TAA	T	p.?	c.4170-4_4170-3delTT	LRP1B	splice_region_variant&intron_variant	2	1	28	1675.5	0.0390939	0.00948561	0.5
Malignant	11	1017650	G	T	p.Asn1717Lys	c.5151C>A	MUC6	missense_variant	.	.	102	6085.39	0.00991525	0.00351021	0.75
Benign	11	1017650	G	T	p.Asn1717Lys	c.5151C>A	MUC6	missense_variant	.	.	29	5376.93	0.0104114	0.00406153	0.517857
Malignant	11	1651615	A	G	p.Tyr182Cys	c.545A>G	KRTAP5-5	missense_variant	27	0	100	1924.88	0.0545312	0.0245665	0.735294
Benign	11	1651615	A	G	p.Tyr182Cys	c.545A>G	KRTAP5-5	missense_variant	27	0	31	1805.58	0.0567981	0.0227594	0.553571
Malignant	21	10908903	G	GA	.	c.1450-9dupT	TPTE	splice_region_variant&intron_variant	.	.	102	3128.01	0.0105117	0.00235664	0.75
Benign	21	10908903	G	GA	.	c.1450-9dupT	TPTE	splice_region_variant&intron_variant	.	.	29	2774.21	0.0134498	0.0127713	0.517857
Malignant	2	141625834	T	TAA	.	c.4170-4_4170-3dupTT	LRP1B	splice_region_variant&intron_variant	.	.	102	1880.98	0.0138507	0.00404444	0.75
Benign	2	141625834	T	TAA	.	c.4170-4_4170-3dupTT	LRP1B	splice_region_variant&intron_variant	.	.	28	1675.5	0.0143789	0.00451889	0.5
Malignant	11	1016614	G	T	p.Pro2063Thr	c.6187C>A	MUC6	missense_variant	30	0	99	4449.38	0.177953	0.0513438	0.727941
Benign	11	1016614	G	T	p.Pro2063Thr	c.6187C>A	MUC6	missense_variant	30	0	31	4320.87	0.172522	0.0415565	0.553571
Malignant	11	1651645	A	G	p.Tyr192Cys	c.575A>G	KRTAP5-5	missense_variant	18	0	99	1835.81	0.0586403	0.0263326	0.727941
Benign	11	1651645	A	G	p.Tyr192Cys	c.575A>G	KRTAP5-5	missense_variant	18	0	31	1768.23	0.0593406	0.0257809	0.553571
Malignant	1	120572572	C	T	p.Glu38Lys	c.112G>A	NOTCH2	missense_variant	26	0	100	2222.69	0.106733	0.0362007	0.735294
Benign	1	120572572	C	T	p.Glu38Lys	c.112G>A	NOTCH2	missense_variant	26	0	29	2044.86	0.10776	0.0365968	0.517857
Malignant	1	158637865	GAAAA	G	.	c.1834-17_1834-14delTTTT	SPTA1	splice_region_variant&intron_variant	.	.	93	1326.4	0.031541	0.0169865	0.683824
Benign	1	158637865	GAAAA	G	.	c.1834-17_1834-14delTTTT	SPTA1	splice_region_variant&intron_variant	.	.	36	1272.89	0.0355021	0.0123384	0.642857
Malignant	2	141272360	GA	G	.	c.8150-20delT	LRP1B	splice_region_variant&intron_variant	.	.	99	2411.03	0.0545487	0.0290973	0.727941
Benign	2	141272360	GA	G	.	c.8150-20delT	LRP1B	splice_region_variant&intron_variant	.	.	30	2160.53	0.0493827	0.0133333	0.535714
Malignant	7	151875100	TAAAA	T	.	c.7443-9_7443-6delTTTT	KMT2C	splice_region_variant&intron_variant	.	.	92	1289.13	0.0119447	0.00583231	0.676471
Benign	7	151875100	TAAAA	T	.	c.7443-9_7443-6delTTTT	KMT2C	splice_region_variant&intron_variant	.	.	36	1422.06	0.0146041	0.00918412	0.642857
Malignant	11	1017211	C	A	p.Ala1864Ser	c.5590G>T	MUC6	missense_variant	.	.	98	9960.42	0.0193257	0.00773437	0.720588
Benign	11	1017211	C	A	p.Ala1864Ser	c.5590G>T	MUC6	missense_variant	.	.	30	8749.63	0.0217774	0.00837676	0.535714
Malignant	1	120572547	T	C	p.Asn46Ser	c.137A>G	NOTCH2	missense_variant	27	0	99	1961.45	0.112372	0.0371344	0.727941
Benign	1	120572547	T	C	p.Asn46Ser	c.137A>G	NOTCH2	missense_variant	27	0	28	1832.64	0.11216	0.0381449	0.5
Malignant	1	158637865	G	GA	.	c.1834-14dupT	SPTA1	splice_region_variant&intron_variant	.	.	85	1299.41	0.0349279	0.020682	0.625
Benign	1	158637865	G	GA	.	c.1834-14dupT	SPTA1	splice_region_variant&intron_variant	.	.	42	1377.79	0.0379824	0.0264781	0.75
Malignant	2	141202032	GGA	G	.	c.10175-16_10175-15delTC	LRP1B	splice_region_variant&intron_variant	.	.	96	2109.16	0.0098266	0.00242974	0.705882
Benign	2	141202032	GGA	G	.	c.10175-16_10175-15delTC	LRP1B	splice_region_variant&intron_variant	.	.	31	1977.52	0.0109499	0.00268759	0.553571
Malignant	7	151927025	A	G	p.Tyr987His	c.2959T>C	KMT2C	missense_variant	65	0	95	5388.01	0.168202	0.0503938	0.698529
Benign	7	151927025	A	G	p.Tyr987His	c.2959T>C	KMT2C	missense_variant	65	0	32	5876.09	0.152527	0.0537046	0.571429
Malignant	9	79954425	A	T	.	c.6379-7A>T	VPS13A	splice_region_variant&intron_variant	.	.	93	1428.9	0.012479	0.0054394	0.683824
Benign	9	79954425	A	T	.	c.6379-7A>T	VPS13A	splice_region_variant&intron_variant	.	.	34	1511.79	0.0129747	0.00605685	0.607143
Malignant	11	1016934	G	A	p.Ser1956Leu	c.5867C>T	MUC6	missense_variant	8	0	94	15443.2	0.0214526	0.00983325	0.691176
Benign	11	1016934	G	A	p.Ser1956Leu	c.5867C>T	MUC6	missense_variant	8	0	33	14406.8	0.0308372	0.00867428	0.589286
Malignant	11	1017228	G	T	p.Pro1858His	c.5573C>A	MUC6	missense_variant	.	.	97	8260.08	0.0171856	0.00721241	0.713235
Benign	11	1017228	G	T	p.Pro1858His	c.5573C>A	MUC6	missense_variant	.	.	30	7308.87	0.0191064	0.00777804	0.535714
Malignant	1	182812410	C	CTT	.	c.112-6_112-5dupTT	DHX9	splice_region_variant&intron_variant	.	.	97	1906.41	0.00997898	0.00295806	0.713235
Benign	1	182812410	C	CTT	.	c.112-6_112-5dupTT	DHX9	splice_region_variant&intron_variant	.	.	29	1710.38	0.00951693	0.00242146	0.517857
Malignant	7	151945060	G	A	p.Thr820Ile	c.2459C>T	KMT2C	missense_variant	8	0	88	7322.14	0.0089094	0.00317827	0.647059
Benign	7	151945060	G	A	p.Thr820Ile	c.2459C>T	KMT2C	missense_variant	8	0	38	7912.21	0.010698	0.00445499	0.678571
Malignant	10	89720720	G	T	p.Glu464*	c.1390G>T	PTEN	stop_gained	2	0	94	2372.06	0.00845918	0.00411457	0.691176
Benign	10	89720720	G	T	p.Glu464*	c.1390G>T	PTEN	stop_gained	2	0	32	2318.78	0.00787803	0.00195088	0.571429
Malignant	11	1017041	G	T	p.Tyr1920*	c.5760C>A	MUC6	stop_gained	25	0	96	11850.5	0.183042	0.0363363	0.705882
Benign	11	1017041	G	T	p.Tyr1920*	c.5760C>A	MUC6	stop_gained	25	0	30	11028.2	0.187603	0.029692	0.535714
Malignant	11	1017042	T	G	p.Tyr1920Ser	c.5759A>C	MUC6	missense_variant	29	0	96	11770.8	0.183328	0.036361	0.705882
Benign	11	1017042	T	G	p.Tyr1920Ser	c.5759A>C	MUC6	missense_variant	29	0	30	10957.7	0.187972	0.0299796	0.535714
Malignant	11	1017045	G	T	p.Pro1919His	c.5756C>A	MUC6	missense_variant	32	0	96	11878	0.187167	0.0367974	0.705882
Benign	11	1017045	G	T	p.Pro1919His	c.5756C>A	MUC6	missense_variant	32	0	30	11060.8	0.191832	0.0301451	0.535714
Malignant	2	141294285	G	GAA	.	c.7514-9_7514-8dupTT	LRP1B	splice_region_variant&intron_variant	.	.	96	1740.73	0.0102901	0.00251338	0.705882
Benign	2	141294285	G	GAA	.	c.7514-9_7514-8dupTT	LRP1B	splice_region_variant&intron_variant	.	.	29	1508.59	0.0106627	0.00355589	0.517857
Malignant	9	79852922	G	T	p.Glu534*	c.1600G>T	VPS13A	stop_gained	1	0	87	1237.99	0.00901386	0.00287808	0.639706
Benign	9	79852922	G	T	p.Glu534*	c.1600G>T	VPS13A	stop_gained	1	0	38	1306.66	0.00860248	0.0023586	0.678571
Malignant	11	1016776	C	G	p.Val2009Leu	c.6025G>C	MUC6	missense_variant	2	0	96	18517.4	0.098737	0.0456059	0.705882
Benign	11	1016776	C	G	p.Val2009Leu	c.6025G>C	MUC6	missense_variant	2	0	29	17361.7	0.0975923	0.0491725	0.517857
Malignant	11	1017092	G	C	p.Ser1903Arg	c.5709C>G	MUC6	missense_variant	.	.	95	13938.8	0.0281473	0.0115488	0.698529
Benign	11	1017092	G	C	p.Ser1903Arg	c.5709C>G	MUC6	missense_variant	.	.	30	12362.1	0.0333457	0.0116394	0.535714
Malignant	11	1017522	T	G	p.Glu1760Ala	c.5279A>C	MUC6	missense_variant	16	0	95	11414.1	0.0487928	0.0188454	0.698529
Benign	11	1017522	T	G	p.Glu1760Ala	c.5279A>C	MUC6	missense_variant	16	0	30	9943	0.056171	0.0208922	0.535714
Malignant	2	141625834	TAAA	T	.	c.4170-5_4170-3delTTT	LRP1B	splice_region_variant&intron_variant	.	.	99	1883.37	0.0104473	0.00381309	0.727941
Benign	2	141625834	TAAA	T	.	c.4170-5_4170-3delTTT	LRP1B	splice_region_variant&intron_variant	.	.	25	1736.44	0.010216	0.00339404	0.446429
Malignant	8	51314749	G	GTT	.	c.28-11_28-10dupTT	SNTG1	splice_region_variant&intron_variant	.	.	98	1759.35	0.00880087	0.00241459	0.720588
Benign	8	51314749	G	GTT	.	c.28-11_28-10dupTT	SNTG1	splice_region_variant&intron_variant	.	.	26	1605.5	0.00921641	0.00220741	0.464286
Malignant	11	1016613	G	C	p.Pro2063Arg	c.6188C>G	MUC6	missense_variant	.	.	96	4473.46	0.0123952	0.00801884	0.705882
Benign	11	1016613	G	C	p.Pro2063Arg	c.6188C>G	MUC6	missense_variant	.	.	28	4492.18	0.011335	0.00683003	0.5
Malignant	2	212578379	TA	T	.	c.884-7delT	ERBB4	splice_region_variant&intron_variant	.	.	97	1669.34	0.139396	0.0628313	0.713235
Benign	2	212578379	TA	T	.	c.884-7delT	ERBB4	splice_region_variant&intron_variant	.	.	26	1504.12	0.134478	0.0640504	0.464286
Malignant	10	89720670	G	T	p.Trp447Leu	c.1340G>T	PTEN	missense_variant	.	.	82	1662.17	0.0074185	0.00250574	0.602941
Benign	10	89720670	G	T	p.Trp447Leu	c.1340G>T	PTEN	missense_variant	.	.	41	1663.78	0.00860448	0.00241303	0.732143
Malignant	11	1016978	T	A	p.Lys1941Asn	c.5823A>T	MUC6	missense_variant	.	.	90	13721.5	0.0122423	0.00406521	0.661765
Benign	11	1016978	T	A	p.Lys1941Asn	c.5823A>T	MUC6	missense_variant	.	.	33	12676.7	0.0151941	0.00430061	0.589286
Malignant	12	43887064	TA	T	.	c.868-9delT	ADAMTS20	splice_region_variant&intron_variant	.	.	95	1132.55	0.0137256	0.00376314	0.698529
Benign	12	43887064	TA	T	.	c.868-9delT	ADAMTS20	splice_region_variant&intron_variant	.	.	27	1074.44	0.0142097	0.00471712	0.482143
Malignant	13	49039174	C	A	p.Ser751Tyr	c.2252C>A	RB1	missense_variant	1	0	96	1260.78	0.0157405	0.00648158	0.705882
Benign	13	49039174	C	A	p.Ser751Tyr	c.2252C>A	RB1	missense_variant	1	0	26	1222.54	0.0141076	0.0041651	0.464286
Malignant	7	116398498	AT	A	.	c.2103-7delT	MET	splice_region_variant&intron_variant	.	.	84	1622.26	0.00716021	0.00188885	0.617647
Benign	7	116398498	AT	A	.	c.2103-7delT	MET	splice_region_variant&intron_variant	.	.	37	1846.27	0.00763072	0.00183351	0.660714
Malignant	7	151891358	TAA	T	.	c.4508-14_4508-13delTT	KMT2C	splice_region_variant&intron_variant	.	.	85	1234.53	0.00791457	0.0030669	0.625
Benign	7	151891358	TAA	T	.	c.4508-14_4508-13delTT	KMT2C	splice_region_variant&intron_variant	.	.	36	1460.61	0.0089196	0.00299144	0.642857
Malignant	7	151970777	G	A	.	c.1012+13C>T	KMT2C	splice_region_variant&intron_variant	.	.	88	8658.22	0.0657153	0.0246488	0.647059
Benign	7	151970777	G	A	.	c.1012+13C>T	KMT2C	splice_region_variant&intron_variant	.	.	33	8763.79	0.0741493	0.0327894	0.589286
Malignant	11	1017015	T	G	p.Glu1929Ala	c.5786A>C	MUC6	missense_variant	.	.	91	13354.5	0.0115615	0.00531167	0.669118
Benign	11	1017015	T	G	p.Glu1929Ala	c.5786A>C	MUC6	missense_variant	.	.	30	11865.9	0.0138155	0.0064462	0.535714
Malignant	17	29676104	CTTGT	C	.	c.7190-11_7190-8delGTTT	NF1	splice_region_variant&intron_variant	.	.	94	1028.4	0.0205411	0.00523688	0.691176
Benign	17	29676104	CTTGT	C	.	c.7190-11_7190-8delGTTT	NF1	splice_region_variant&intron_variant	.	.	27	941.926	0.0223586	0.00675878	0.482143
Malignant	7	152055766	GAA	G	.	c.162-8_162-7delTT	KMT2C	splice_region_variant&intron_variant	.	.	85	1330.32	0.00738331	0.00182068	0.625
Benign	7	152055766	GAA	G	.	c.162-8_162-7delTT	KMT2C	splice_region_variant&intron_variant	.	.	35	1374.26	0.00720843	0.00165149	0.625
Malignant	11	1017498	C	T	p.Ser1768Asn	c.5303G>A	MUC6	missense_variant	1	0	87	12568.5	0.0132855	0.00659116	0.639706
Benign	11	1017498	C	T	p.Ser1768Asn	c.5303G>A	MUC6	missense_variant	1	0	33	11566.5	0.0155261	0.00587189	0.589286
Malignant	17	29482988	C	A	.	c.61-13C>A	NF1	splice_region_variant&intron_variant	.	.	96	1003.48	0.0330217	0.0147763	0.705882
Benign	17	29482988	C	A	.	c.61-13C>A	NF1	splice_region_variant&intron_variant	.	.	24	940.292	0.038006	0.0115166	0.428571
Malignant	21	10943003	C	T	p.Arg195Gln	c.584G>A	TPTE	missense_variant	25	0	95	3815.86	0.110721	0.034935	0.698529
Benign	21	10943003	C	T	p.Arg195Gln	c.584G>A	TPTE	missense_variant	25	0	25	3378.8	0.125746	0.0491733	0.446429
Malignant	7	151945256	G	A	p.Gln755*	c.2263C>T	KMT2C	stop_gained	25	0	83	2708.35	0.0145065	0.0160281	0.610294
Benign	7	151945256	G	A	p.Gln755*	c.2263C>T	KMT2C	stop_gained	25	0	36	3011.03	0.0347423	0.034853	0.642857
Malignant	11	1016964	C	T	p.Gly1946Asp	c.5837G>A	MUC6	missense_variant	1	0	86	14001.2	0.0100362	0.00299554	0.632353
Benign	11	1016964	C	T	p.Gly1946Asp	c.5837G>A	MUC6	missense_variant	1	0	33	13197.1	0.0117729	0.00259881	0.589286
Malignant	13	49039158	G	T	p.Glu746*	c.2236G>T	RB1	stop_gained	1	0	95	1113.29	0.0193514	0.00733904	0.698529
Benign	13	49039158	G	T	p.Glu746*	c.2236G>T	RB1	stop_gained	1	0	24	1116.17	0.019593	0.00620126	0.428571
Malignant	17	29482988	C	CT	.	c.61-4dupT	NF1	splice_region_variant&intron_variant	.	.	95	1008.51	0.0185153	0.00484864	0.698529
Benign	17	29482988	C	CT	.	c.61-4dupT	NF1	splice_region_variant&intron_variant	.	.	24	940.292	0.0213159	0.00720417	0.428571
Malignant	17	29482988	C	T	.	c.61-13C>T	NF1	splice_region_variant&intron_variant	.	.	95	1008.62	0.0127474	0.00490109	0.698529
Benign	17	29482988	C	T	.	c.61-13C>T	NF1	splice_region_variant&intron_variant	.	.	24	940.292	0.0128333	0.00332644	0.428571
Malignant	17	37881635	A	C	p.Gln902Pro	c.2705A>C	ERBB2	missense_variant	.	.	78	2071.41	0.00994526	0.00606574	0.573529
Benign	17	37881635	A	C	p.Gln902Pro	c.2705A>C	ERBB2	missense_variant	.	.	40	2049.53	0.0133415	0.00702392	0.714286
Malignant	1	27101586	C	T	p.Ser1623Leu	c.4868C>T	ARID1A	missense_variant	1	0	89	1896.37	0.0108914	0.00363715	0.654412
Benign	1	27101586	C	T	p.Ser1623Leu	c.4868C>T	ARID1A	missense_variant	1	0	28	1646.29	0.011411	0.00438101	0.5
Malignant	11	1017498	C	G	p.Ser1768Thr	c.5303G>C	MUC6	missense_variant	12	0	91	13012.2	0.209086	0.0370113	0.669118
Benign	11	1017498	C	G	p.Ser1768Thr	c.5303G>C	MUC6	missense_variant	12	0	26	12171.5	0.218433	0.0210852	0.464286
Malignant	17	29482977	G	GT	.	c.61-14dupT	NF1	splice_region_variant&intron_variant	.	.	93	970.054	0.0718169	0.012065	0.683824
Benign	17	29482977	G	GT	.	c.61-14dupT	NF1	splice_region_variant&intron_variant	.	.	24	899.75	0.0699177	0.0122266	0.428571
Malignant	21	10942756	G	A	p.Arg229*	c.685C>T	TPTE	stop_gained	28	0	95	5223.63	0.158397	0.0435391	0.698529
Benign	21	10942756	G	A	p.Arg229*	c.685C>T	TPTE	stop_gained	28	0	22	4496.59	0.165648	0.051013	0.392857
Malignant	7	140434574	C	CAA	.	c.2128-6_2128-5dupTT	BRAF	splice_region_variant&intron_variant	.	.	90	1461.03	0.014791	0.0108824	0.661765
Benign	7	140434574	C	CAA	.	c.2128-6_2128-5dupTT	BRAF	splice_region_variant&intron_variant	.	.	26	1219.73	0.0162694	0.0134478	0.464286
Malignant	8	113516208	TGA	T	.	c.4896-4_4896-3delTC	CSMD3	splice_region_variant&intron_variant	.	.	81	1427.57	0.00953626	0.00382808	0.595588
Benign	8	113516208	TGA	T	.	c.4896-4_4896-3delTC	CSMD3	splice_region_variant&intron_variant	.	.	35	1667.94	0.010818	0.00518033	0.625
Malignant	17	29482977	GT	G	.	c.61-14delT	NF1	splice_region_variant&intron_variant	.	.	92	974.446	0.0129253	0.00366661	0.676471
Benign	17	29482977	GT	G	.	c.61-14delT	NF1	splice_region_variant&intron_variant	.	.	24	899.75	0.0144866	0.00336681	0.428571
Malignant	1	158584103	GA	G	p.?	c.6789-8delT	SPTA1	splice_region_variant&intron_variant	2	0	75	1455.4	0.025586	0.0110289	0.551471
Benign	1	158584103	GA	G	p.?	c.6789-8delT	SPTA1	splice_region_variant&intron_variant	2	0	40	1386.6	0.0307693	0.0156523	0.714286
Malignant	3	47125884	T	TA	.	c.5398-13dupT	SETD2	splice_region_variant&intron_variant	.	.	79	843.354	0.0108092	0.00493497	0.580882
Benign	3	47125884	T	TA	.	c.5398-13dupT	SETD2	splice_region_variant&intron_variant	.	.	35	1127.63	0.0142731	0.00476635	0.625
Malignant	11	1016958	C	A	p.Arg1948Ile	c.5843G>T	MUC6	missense_variant	.	.	81	14122.3	0.00885698	0.00214314	0.595588
Benign	11	1016958	C	A	p.Arg1948Ile	c.5843G>T	MUC6	missense_variant	.	.	33	13551	0.0102785	0.00199621	0.589286
Malignant	11	1017464	T	G	p.Arg1779Ser	c.5337A>C	MUC6	missense_variant	.	.	85	13089.3	0.0114194	0.00647911	0.625
Benign	11	1017464	T	G	p.Arg1779Ser	c.5337A>C	MUC6	missense_variant	.	.	29	12278.4	0.0145361	0.00764139	0.517857
Malignant	11	1017639	G	A	p.Thr1721Ile	c.5162C>T	MUC6	missense_variant	.	.	89	6463.35	0.00882845	0.00423505	0.654412
Benign	11	1017639	G	A	p.Thr1721Ile	c.5162C>T	MUC6	missense_variant	.	.	25	5975.68	0.0093747	0.00382729	0.446429
Malignant	17	29685481	C	CT	.	c.7971-8dupT	NF1	splice_region_variant&intron_variant	.	.	90	919.533	0.0172168	0.00507905	0.661765
Benign	17	29685481	C	CT	.	c.7971-8dupT	NF1	splice_region_variant&intron_variant	.	.	24	887.25	0.0165976	0.00542096	0.428571
Malignant	1	237619875	A	ATTT	.	c.1477-13_1477-11dupTTT	RYR2	splice_region_variant&intron_variant	.	.	91	2044.12	0.0177003	0.0154675	0.669118
Benign	1	237619875	A	ATTT	.	c.1477-13_1477-11dupTTT	RYR2	splice_region_variant&intron_variant	.	.	22	1852.14	0.0167586	0.0140994	0.392857
Malignant	7	151932916	C	G	p.Val919Leu	c.2755G>C	KMT2C	missense_variant	10	0	77	1978.9	0.0110832	0.00876516	0.566176
Benign	7	151932916	C	G	p.Val919Leu	c.2755G>C	KMT2C	missense_variant	10	0	36	2219.83	0.0208865	0.0153843	0.642857
Malignant	X	91134112	C	T	p.Ser958Leu	c.2873C>T	PCDH11X	missense_variant	1	0	81	1796.89	0.0790299	0.0115759	0.595588
Benign	X	91134112	C	T	p.Ser958Leu	c.2873C>T	PCDH11X	missense_variant	1	0	30	2122.2	0.0837511	0.0110622	0.535714
Malignant	7	14775823	G	C	p.?	c.169-4C>G	DGKB	splice_region_variant&intron_variant	28	7	80	1771.89	0.0746212	0.0278643	0.588235
Benign	7	14775823	G	C	p.?	c.169-4C>G	DGKB	splice_region_variant&intron_variant	28	7	29	1689.66	0.0713008	0.0298372	0.517857
Malignant	7	116409675	CTTTT	C	.	c.2638-12_2638-9delTTTT	MET	splice_region_variant&intron_variant	.	.	74	1689.22	0.00801423	0.00305277	0.544118
Benign	7	116409675	CTTTT	C	.	c.2638-12_2638-9delTTTT	MET	splice_region_variant&intron_variant	.	.	35	1634.4	0.00768923	0.00218146	0.625
Malignant	9	79922845	C	CTT	.	c.3961-7_3961-6dupTT	VPS13A	splice_region_variant&intron_variant	.	.	77	1011.57	0.0362489	0.0172917	0.566176
Benign	9	79922845	C	CTT	.	c.3961-7_3961-6dupTT	VPS13A	splice_region_variant&intron_variant	.	.	32	1125.25	0.0439689	0.0225607	0.571429
Malignant	7	151836878	TA	T	p.?	c.14344-3delT	KMT2C	splice_region_variant&intron_variant	10	0	72	1007.54	0.00833518	0.00268475	0.529412
Benign	7	151836878	TA	T	p.?	c.14344-3delT	KMT2C	splice_region_variant&intron_variant	10	0	36	964.556	0.0102029	0.00395103	0.642857
Malignant	8	113516209	G	GA	p.?	c.4896-4dupT	CSMD3	splice_region_variant&intron_variant	1	0	75	1519.65	0.0276273	0.0103375	0.551471
Benign	8	113516209	G	GA	p.?	c.4896-4dupT	CSMD3	splice_region_variant&intron_variant	1	0	33	1590.24	0.030706	0.0139832	0.589286
Malignant	9	79852934	G	T	p.Asp538Tyr	c.1612G>T	VPS13A	missense_variant	1	0	73	1341.92	0.00852134	0.00286883	0.536765
Benign	9	79852934	G	T	p.Asp538Tyr	c.1612G>T	VPS13A	missense_variant	1	0	35	1351.2	0.00800866	0.00245823	0.625
Malignant	9	139413921	T	G	p.Asn280Thr	c.839A>C	NOTCH1	missense_variant	.	.	83	2607.4	0.00882136	0.00302929	0.610294
Benign	9	139413921	T	G	p.Asn280Thr	c.839A>C	NOTCH1	missense_variant	.	.	25	2318.08	0.00856483	0.00272819	0.446429
Malignant	2	116283464	C	A	.	c.418-10C>A	DPP10	splice_region_variant&intron_variant	.	.	83	1267.8	0.00882059	0.00333477	0.610294
Benign	2	116283464	C	A	.	c.418-10C>A	DPP10	splice_region_variant&intron_variant	.	.	24	1282.88	0.00951252	0.00346904	0.428571
Malignant	9	79954407	TTTG	T	.	c.6379-22_6379-20delGTT	VPS13A	splice_region_variant&intron_variant	.	.	77	1315.05	0.0141905	0.00668471	0.566176
Benign	9	79954407	TTTG	T	.	c.6379-22_6379-20delGTT	VPS13A	splice_region_variant&intron_variant	.	.	30	1503.2	0.0166704	0.00626889	0.535714
Malignant	13	48955363	C	CT	.	c.1499-10dupT	RB1	splice_region_variant&intron_variant	.	.	84	878.607	0.0490316	0.00889917	0.617647
Benign	13	48955363	C	CT	.	c.1499-10dupT	RB1	splice_region_variant&intron_variant	.	.	23	815.435	0.0473822	0.0121359	0.410714
Malignant	9	79954410	G	GTT	.	c.6379-9_6379-8dupTT	VPS13A	splice_region_variant&intron_variant	.	.	88	1447.76	0.0225259	0.0121901	0.647059
Benign	9	79954410	G	GTT	.	c.6379-9_6379-8dupTT	VPS13A	splice_region_variant&intron_variant	.	.	18	1378.67	0.0223857	0.0144373	0.321429
Malignant	13	48955363	CT	C	.	c.1499-10delT	RB1	splice_region_variant&intron_variant	.	.	84	878.607	0.0323108	0.007114	0.617647
Benign	13	48955363	CT	C	.	c.1499-10delT	RB1	splice_region_variant&intron_variant	.	.	22	796.682	0.034435	0.00920967	0.392857
Malignant	1	237965209	C	A	p.Thr4715Asn	c.14144C>A	RYR2	missense_variant	1	1	71	1408.61	0.00762054	0.00226102	0.522059
Benign	1	237965209	C	A	p.Thr4715Asn	c.14144C>A	RYR2	missense_variant	1	1	34	1481.38	0.00845078	0.00264564	0.607143
Malignant	2	212578379	T	TAA	.	c.884-8_884-7dupTT	ERBB4	splice_region_variant&intron_variant	.	.	79	1665.34	0.0100737	0.00326304	0.580882
Benign	2	212578379	T	TAA	.	c.884-8_884-7dupTT	ERBB4	splice_region_variant&intron_variant	.	.	26	1519.08	0.0107908	0.00428709	0.464286
Malignant	8	113516209	GA	G	p.?	c.4896-4delT	CSMD3	splice_region_variant&intron_variant	1	0	72	1532.6	0.0128264	0.00477109	0.529412
Benign	8	113516209	GA	G	p.?	c.4896-4delT	CSMD3	splice_region_variant&intron_variant	1	0	33	1590.24	0.0145434	0.0068552	0.589286
Malignant	9	79814840	CT	C	.	c.101-13delT	VPS13A	splice_region_variant&intron_variant	.	.	68	1261	0.00800825	0.00244671	0.5
Benign	9	79814840	CT	C	.	c.101-13delT	VPS13A	splice_region_variant&intron_variant	.	.	37	1225.7	0.00845083	0.00348078	0.660714
Malignant	13	48955374	C	A	.	c.1499-9C>A	RB1	splice_region_variant&intron_variant	.	.	83	970.458	0.0100804	0.00348439	0.610294
Benign	13	48955374	C	A	.	c.1499-9C>A	RB1	splice_region_variant&intron_variant	.	.	22	913.727	0.0121753	0.00473921	0.392857
Malignant	8	139165463	CAA	C	.	c.1259-6_1259-5delTT	FAM135B	splice_region_variant&intron_variant	.	.	79	1561.22	0.00950777	0.00278902	0.580882
Benign	8	139165463	CAA	C	.	c.1259-6_1259-5delTT	FAM135B	splice_region_variant&intron_variant	.	.	24	1493.58	0.0100019	0.00440287	0.428571
Malignant	2	141032172	GA	G	p.?	c.12968-6delT	LRP1B	splice_region_variant&intron_variant	1	0	75	1969.25	0.00753535	0.00217134	0.551471
Benign	2	141032172	GA	G	p.?	c.12968-6delT	LRP1B	splice_region_variant&intron_variant	1	0	27	1854.52	0.00807971	0.00163178	0.482143
Malignant	7	14775822	GGA	G	.	c.169-5_169-4delTC	DGKB	splice_region_variant&intron_variant	.	.	75	1820	0.0119234	0.0052535	0.551471
Benign	7	14775822	GGA	G	.	c.169-5_169-4delTC	DGKB	splice_region_variant&intron_variant	.	.	27	1758.37	0.0111407	0.00571817	0.482143
Malignant	7	14775825	A	C	p.?	c.169-6T>G	DGKB	splice_region_variant&intron_variant	5	0	75	1697.47	0.0128708	0.00583395	0.551471
Benign	7	14775825	A	C	p.?	c.169-6T>G	DGKB	splice_region_variant&intron_variant	5	0	27	1640.11	0.0121146	0.00645472	0.482143
Malignant	7	151836878	T	TA	p.?	c.14344-3dupT	KMT2C	splice_region_variant&intron_variant	1	0	72	1034.31	0.00884785	0.00343245	0.529412
Benign	7	151836878	T	TA	p.?	c.14344-3dupT	KMT2C	splice_region_variant&intron_variant	1	0	30	980.767	0.010387	0.00437757	0.535714
Malignant	7	151882622	TAG	T	.	c.5082+19_5082+20delCT	KMT2C	splice_region_variant&intron_variant	.	.	76	1402.8	0.184998	0.055699	0.558824
Benign	7	151882622	TAG	T	.	c.5082+19_5082+20delCT	KMT2C	splice_region_variant&intron_variant	.	.	26	1431.54	0.18283	0.054321	0.464286
Malignant	1	237850736	G	T	.	c.9018-19G>T	RYR2	splice_region_variant&intron_variant	.	.	67	926.478	0.00906886	0.00271638	0.492647
Benign	1	237850736	G	T	.	c.9018-19G>T	RYR2	splice_region_variant&intron_variant	.	.	34	905.265	0.00889774	0.00279161	0.607143
Malignant	9	79852914	G	T	p.?	c.1596-4G>T	VPS13A	splice_region_variant&intron_variant	1	0	70	1169.73	0.0079594	0.00253673	0.514706
Benign	9	79852914	G	T	p.?	c.1596-4G>T	VPS13A	splice_region_variant&intron_variant	1	0	31	1243.58	0.00885239	0.00217135	0.553571
Malignant	9	79955305	AT	A	.	c.6880-6delT	VPS13A	splice_region_variant&intron_variant	.	.	67	1502.25	0.00737014	0.00266136	0.492647
Benign	9	79955305	AT	A	.	c.6880-6delT	VPS13A	splice_region_variant&intron_variant	.	.	34	1636.15	0.00779154	0.00198832	0.607143
Malignant	17	29685481	CT	C	.	c.7971-8delT	NF1	splice_region_variant&intron_variant	.	.	79	933.797	0.0100911	0.00348284	0.580882
Benign	17	29685481	CT	C	.	c.7971-8delT	NF1	splice_region_variant&intron_variant	.	.	22	901	0.00944958	0.00293836	0.392857
Malignant	7	116398498	A	AT	.	c.2103-7dupT	MET	splice_region_variant&intron_variant	.	.	67	1719.13	0.00714323	0.00203959	0.492647
Benign	7	116398498	A	AT	.	c.2103-7dupT	MET	splice_region_variant&intron_variant	.	.	33	1897.42	0.00739668	0.001764	0.589286
Malignant	7	151882624	G	T	.	c.5082+19C>A	KMT2C	splice_region_variant&intron_variant	.	.	77	1546.69	0.00929936	0.00332921	0.566176
Benign	7	151882624	G	T	.	c.5082+19C>A	KMT2C	splice_region_variant&intron_variant	.	.	23	1425.13	0.00940102	0.00348161	0.410714
Malignant	8	51314749	GTT	G	.	c.28-11_28-10delTT	SNTG1	splice_region_variant&intron_variant	.	.	76	1786.03	0.00734396	0.00157599	0.558824
Benign	8	51314749	GTT	G	.	c.28-11_28-10delTT	SNTG1	splice_region_variant&intron_variant	.	.	24	1605.54	0.00750666	0.00197471	0.428571
Malignant	11	1017112	G	C	p.Pro1897Ala	c.5689C>G	MUC6	missense_variant	23	0	74	12366.8	0.198815	0.0349563	0.544118
Benign	11	1017112	G	C	p.Pro1897Ala	c.5689C>G	MUC6	missense_variant	23	0	25	11454.8	0.199852	0.0323449	0.446429
Malignant	13	49039146	G	T	p.Val742Phe	c.2224G>T	RB1	missense_variant	.	.	77	970.299	0.0110741	0.00367539	0.566176
Benign	13	49039146	G	T	p.Val742Phe	c.2224G>T	RB1	missense_variant	.	.	21	925	0.0107273	0.004145	0.375
Malignant	7	140434585	A	G	.	c.2128-15T>C	BRAF	splice_region_variant&intron_variant	.	.	65	1229.17	0.00753781	0.00320321	0.477941
Benign	7	140434585	A	G	.	c.2128-15T>C	BRAF	splice_region_variant&intron_variant	.	.	32	1358.62	0.0082538	0.00335486	0.571429
Malignant	13	49039161	G	T	p.Glu747*	c.2239G>T	RB1	stop_gained	2	0	75	1151.44	0.00956202	0.00355203	0.551471
Benign	13	49039161	G	T	p.Glu747*	c.2239G>T	RB1	stop_gained	2	0	21	1135.86	0.0103612	0.00388526	0.375
Malignant	3	47125884	TA	T	.	c.5398-13delT	SETD2	splice_region_variant&intron_variant	.	.	63	859.952	0.00991	0.00383404	0.463235
Benign	3	47125884	TA	T	.	c.5398-13delT	SETD2	splice_region_variant&intron_variant	.	.	32	1179.78	0.0120011	0.00426399	0.571429
Malignant	9	139417498	A	C	p.Cys182Trp	c.546T>G	NOTCH1	missense_variant	3	0	64	3145.88	0.00786095	0.0025715	0.470588
Benign	9	139417498	A	C	p.Cys182Trp	c.546T>G	NOTCH1	missense_variant	3	0	31	3478.19	0.00775758	0.00199195	0.553571
Malignant	1	237965146	G	T	.	c.14091-10G>T	RYR2	splice_region_variant&intron_variant	.	.	64	1259.64	0.00822332	0.00245454	0.470588
Benign	1	237965146	G	T	.	c.14091-10G>T	RYR2	splice_region_variant&intron_variant	.	.	29	1449.28	0.00846007	0.00274034	0.517857
Malignant	2	80136693	T	TTG	.	c.853-12_853-11dupTG	CTNNA2	splice_region_variant&intron_variant	.	.	70	3576.29	0.0067063	0.00132132	0.514706
Benign	2	80136693	T	TTG	.	c.853-12_853-11dupTG	CTNNA2	splice_region_variant&intron_variant	.	.	23	2894.78	0.00700655	0.00149493	0.410714
Malignant	7	140434586	G	T	.	c.2128-16C>A	BRAF	splice_region_variant&intron_variant	.	.	73	1303.49	0.00819432	0.00219357	0.536765
Benign	7	140434586	G	T	.	c.2128-16C>A	BRAF	splice_region_variant&intron_variant	.	.	20	1172.75	0.00920637	0.00212401	0.357143
Malignant	7	151851245	G	GA	.	c.12140-15dupT	KMT2C	splice_region_variant&intron_variant	.	.	62	1793.37	0.00696401	0.00185451	0.455882
Benign	7	151851245	G	GA	.	c.12140-15dupT	KMT2C	splice_region_variant&intron_variant	.	.	31	2140.06	0.00756157	0.00157796	0.553571
Malignant	11	1016611	T	C	p.Met2064Val	c.6190A>G	MUC6	missense_variant	.	.	78	4343.46	0.0092014	0.00384866	0.573529
Benign	11	1016611	T	C	p.Met2064Val	c.6190A>G	MUC6	missense_variant	.	.	15	4759.6	0.00873116	0.00391533	0.267857
Malignant	11	1016770	G	A	p.Pro2011Ser	c.6031C>T	MUC6	missense_variant	2	0	68	16522.1	0.00723343	0.00434092	0.5
Benign	11	1016770	G	A	p.Pro2011Ser	c.6031C>T	MUC6	missense_variant	2	0	25	16677.7	0.00660705	0.00140199	0.446429
Malignant	1	115251293	G	GA	.	c.451-19dupT	NRAS	splice_region_variant&intron_variant	.	.	57	1556.49	0.00723389	0.00206854	0.419118
Benign	1	115251293	G	GA	.	c.451-19dupT	NRAS	splice_region_variant&intron_variant	.	.	35	1793.69	0.00769846	0.00221112	0.625
Malignant	11	1016968	T	C	p.Thr1945Ala	c.5833A>G	MUC6	missense_variant	.	.	61	14447.9	0.00855056	0.0024426	0.448529
Benign	11	1016968	T	C	p.Thr1945Ala	c.5833A>G	MUC6	missense_variant	.	.	31	12821	0.00964307	0.003044	0.553571
Malignant	7	14775823	G	GA	.	c.169-5dupT	DGKB	splice_region_variant&intron_variant	.	.	70	1932.04	0.0292846	0.0114934	0.514706
Benign	7	14775823	G	GA	.	c.169-5dupT	DGKB	splice_region_variant&intron_variant	.	.	21	1785.14	0.0240223	0.00935071	0.375
Malignant	10	43610199	G	A	.	c.2136+15G>A	RET	splice_region_variant&intron_variant	.	.	55	4175	0.00730917	0.00190679	0.404412
Benign	10	43610199	G	A	.	c.2136+15G>A	RET	splice_region_variant&intron_variant	.	.	36	5458.42	0.00833191	0.00257766	0.642857
Malignant	11	1016766	A	G	p.Phe2012Ser	c.6035T>C	MUC6	missense_variant	.	.	70	16749.2	0.00934673	0.00523942	0.514706
Benign	11	1016766	A	G	p.Phe2012Ser	c.6035T>C	MUC6	missense_variant	.	.	21	14459.2	0.00913641	0.00375893	0.375
Malignant	19	10600312	G	A	.	c.1531+12C>T	KEAP1	splice_region_variant&intron_variant	.	.	63	1730.4	0.0102157	0.00442883	0.463235
Benign	19	10600312	G	A	.	c.1531+12C>T	KEAP1	splice_region_variant&intron_variant	.	.	28	1660.61	0.00920762	0.00310539	0.5
Malignant	7	14775823	GA	G	p.?	c.169-5delT	DGKB	splice_region_variant&intron_variant	1	0	69	1952.51	0.0136789	0.0050237	0.507353
Benign	7	14775823	GA	G	p.?	c.169-5delT	DGKB	splice_region_variant&intron_variant	1	0	21	1785.14	0.0128201	0.00632757	0.375
Malignant	7	151932990	C	T	p.Arg894Gln	c.2681G>A	KMT2C	missense_variant	10	0	61	2750.07	0.0300388	0.0132041	0.448529
Benign	7	151932990	C	T	p.Arg894Gln	c.2681G>A	KMT2C	missense_variant	10	0	29	2641.1	0.0369305	0.0135714	0.517857
Malignant	13	48954282	C	CT	.	c.1422-8dupT	RB1	splice_region_variant&intron_variant	.	.	73	805.205	0.0650949	0.00988896	0.536765
Benign	13	48954282	C	CT	.	c.1422-8dupT	RB1	splice_region_variant&intron_variant	.	.	17	749.235	0.0632219	0.00842543	0.303571
Malignant	21	10920176	G	T	.	c.1090-12C>A	TPTE	splice_region_variant&intron_variant	.	.	70	4563.13	0.111757	0.0349684	0.514706
Benign	21	10920176	G	T	.	c.1090-12C>A	TPTE	splice_region_variant&intron_variant	.	.	19	3760.05	0.140189	0.0516327	0.339286
Malignant	1	158590266	G	GA	.	c.6121-11dupT	SPTA1	splice_region_variant&intron_variant	.	.	51	2111.9	0.00679976	0.00225188	0.375
Benign	1	158590266	G	GA	.	c.6121-11dupT	SPTA1	splice_region_variant&intron_variant	.	.	37	2236.05	0.00740479	0.00166866	0.660714
Malignant	7	11514022	C	A	p.Gly731Cys	c.2191G>T	THSD7A	missense_variant	1	0	72	2794.49	0.00877708	0.00372558	0.529412
Benign	7	11514022	C	A	p.Gly731Cys	c.2191G>T	THSD7A	missense_variant	1	0	16	2237.38	0.00689215	0.00167908	0.285714
Malignant	13	48954282	CT	C	.	c.1422-8delT	RB1	splice_region_variant&intron_variant	.	.	71	809.296	0.0715052	0.0104337	0.522059
Benign	13	48954282	CT	C	.	c.1422-8delT	RB1	splice_region_variant&intron_variant	.	.	17	749.235	0.0777403	0.0115581	0.303571
Malignant	21	10935004	A	T	p.?	c.796-7T>A	TPTE	splice_region_variant&intron_variant	5	0	70	3919.61	0.120686	0.040056	0.514706
Benign	21	10935004	A	T	p.?	c.796-7T>A	TPTE	splice_region_variant&intron_variant	5	0	18	3312.56	0.138617	0.0508964	0.321429
Malignant	7	151884356	C	A	p.Glu1667*	c.4999G>T	KMT2C	stop_gained	1	0	56	1452.55	0.00753723	0.0052054	0.411765
Benign	7	151884356	C	A	p.Glu1667*	c.4999G>T	KMT2C	stop_gained	1	0	31	1844.71	0.00836497	0.00250872	0.553571
Malignant	9	139402602	T	G	.	c.3326-11A>C	NOTCH1	splice_region_variant&intron_variant	.	.	55	1923.36	0.00718943	0.00168529	0.404412
Benign	9	139402602	T	G	.	c.3326-11A>C	NOTCH1	splice_region_variant&intron_variant	.	.	31	2075.23	0.00695745	0.00136163	0.553571
Malignant	12	43826277	T	TA	.	c.2932-7dupT	ADAMTS20	splice_region_variant&intron_variant	.	.	68	2378.07	0.168065	0.0611218	0.5
Benign	12	43826277	T	TA	.	c.2932-7dupT	ADAMTS20	splice_region_variant&intron_variant	.	.	18	2146.89	0.165472	0.0595494	0.321429
Malignant	13	49039143	C	A	p.Arg741Ser	c.2221C>A	RB1	missense_variant	1	0	69	940	0.00912355	0.00304365	0.507353
Benign	13	49039143	C	A	p.Arg741Ser	c.2221C>A	RB1	missense_variant	1	0	17	850.059	0.00985008	0.00413812	0.303571
Malignant	17	29663625	T	TAA	.	c.6148-18_6148-17dupAA	NF1	splice_region_variant&intron_variant	.	.	67	955.03	0.0230125	0.020433	0.492647
Benign	17	29663625	T	TAA	.	c.6148-18_6148-17dupAA	NF1	splice_region_variant&intron_variant	.	.	19	1027.26	0.0223312	0.00972982	0.339286
Malignant	17	29528406	C	CT	.	c.1186-13dupT	NF1	splice_region_variant&intron_variant	.	.	66	765.894	0.0519238	0.0096373	0.485294
Benign	17	29528406	C	CT	.	c.1186-13dupT	NF1	splice_region_variant&intron_variant	.	.	19	704.632	0.0462233	0.00761087	0.339286
Malignant	17	29528406	CT	C	.	c.1186-13delT	NF1	splice_region_variant&intron_variant	.	.	66	765.894	0.0226558	0.00557246	0.485294
Benign	17	29528406	CT	C	.	c.1186-13delT	NF1	splice_region_variant&intron_variant	.	.	19	704.632	0.0223659	0.00559005	0.339286
Malignant	7	151933014	C	T	p.Arg886His	c.2657G>A	KMT2C	missense_variant	2	0	57	2168.16	0.0126043	0.0107046	0.419118
Benign	7	151933014	C	T	p.Arg886His	c.2657G>A	KMT2C	missense_variant	2	0	27	2028.93	0.0188086	0.015653	0.482143
Malignant	7	151962134	G	T	p.Cys391*	c.1173C>A	KMT2C	stop_gained	32	0	64	6616.52	0.0548143	0.0201778	0.470588
Benign	7	151962134	G	T	p.Cys391*	c.1173C>A	KMT2C	stop_gained	32	0	20	6961.6	0.0604218	0.0306838	0.357143
Malignant	7	151962168	C	A	p.Arg380Leu	c.1139G>T	KMT2C	missense_variant	26	0	64	8161.73	0.0566388	0.0204586	0.470588
Benign	7	151962168	C	A	p.Arg380Leu	c.1139G>T	KMT2C	missense_variant	26	0	20	8609.25	0.0629032	0.0314718	0.357143
Malignant	7	151970859	C	T	p.Gly315Ser	c.943G>A	KMT2C	missense_variant	31	2	64	9856.48	0.0346726	0.0125777	0.470588
Benign	7	151970859	C	T	p.Gly315Ser	c.943G>A	KMT2C	missense_variant	31	2	20	9885	0.041317	0.0208768	0.357143
Malignant	11	1016874	C	G	p.Ser1976Thr	c.5927G>C	MUC6	missense_variant	.	.	56	19369.6	0.00656813	0.00137959	0.411765
Benign	11	1016874	C	G	p.Ser1976Thr	c.5927G>C	MUC6	missense_variant	.	.	28	18178.5	0.00669673	0.000894068	0.5
Malignant	2	212578379	TAAA	T	.	c.884-9_884-7delTTT	ERBB4	splice_region_variant&intron_variant	.	.	63	1604.59	0.00991058	0.00499509	0.463235
Benign	2	212578379	TAAA	T	.	c.884-9_884-7delTTT	ERBB4	splice_region_variant&intron_variant	.	.	20	1498.3	0.010185	0.00551914	0.357143
Malignant	1	182812424	T	A	.	c.112-5T>A	DHX9	splice_region_variant&intron_variant	.	.	61	2012.18	0.00692212	0.00178922	0.448529
Benign	1	182812424	T	A	.	c.112-5T>A	DHX9	splice_region_variant&intron_variant	.	.	21	1828.71	0.00640369	0.001364	0.375
Malignant	1	237965133	A	AT	.	c.14091-11dupT	RYR2	splice_region_variant&intron_variant	.	.	62	1189.15	0.167212	0.0786781	0.455882
Benign	1	237965133	A	AT	.	c.14091-11dupT	RYR2	splice_region_variant&intron_variant	.	.	20	1188	0.17366	0.0701308	0.357143
Malignant	1	237965133	A	ATTT	.	c.14091-13_14091-11dupTTT	RYR2	splice_region_variant&intron_variant	.	.	51	1164.39	0.0113712	0.00848666	0.375
Benign	1	237965133	A	ATTT	.	c.14091-13_14091-11dupTTT	RYR2	splice_region_variant&intron_variant	.	.	31	1277.16	0.0140252	0.0139759	0.553571
Malignant	7	151970969	A	C	.	c.850-17T>G	KMT2C	splice_region_variant&intron_variant	.	.	63	3696.4	0.0170671	0.00941324	0.463235
Benign	7	151970969	A	C	.	c.850-17T>G	KMT2C	splice_region_variant&intron_variant	.	.	19	3814.32	0.0273092	0.0229548	0.339286
Malignant	17	37879585	A	C	p.Ile654Leu	c.1960A>C	ERBB2	missense_variant	.	.	52	2695.42	0.0072557	0.0023137	0.382353
Benign	17	37879585	A	C	p.Ile654Leu	c.1960A>C	ERBB2	missense_variant	.	.	30	2539.7	0.00776809	0.0020655	0.535714
Malignant	8	139380131	A	C	.	c.77+19T>G	FAM135B	splice_region_variant&intron_variant	.	.	66	1270.64	0.00784474	0.00247388	0.485294
Benign	8	139380131	A	C	.	c.77+19T>G	FAM135B	splice_region_variant&intron_variant	.	.	15	1146.93	0.0092894	0.00296349	0.267857
Malignant	1	120539668	T	A	p.Thr235Ser	c.703A>T	NOTCH2	missense_variant	1	0	61	1597.38	0.0101311	0.00420664	0.448529
Benign	1	120539668	T	A	p.Thr235Ser	c.703A>T	NOTCH2	missense_variant	1	0	19	1384.26	0.011138	0.00436809	0.339286
Malignant	2	141474402	G	GAA	.	c.5759-19_5759-18dupTT	LRP1B	splice_region_variant&intron_variant	.	.	64	1383.31	0.00942583	0.00401373	0.470588
Benign	2	141474402	G	GAA	.	c.5759-19_5759-18dupTT	LRP1B	splice_region_variant&intron_variant	.	.	16	1357.19	0.00970362	0.00344347	0.285714
Malignant	7	151875101	A	T	p.?	c.7443-6T>A	KMT2C	splice_region_variant&intron_variant	2	2	53	1418.98	0.0802955	0.104387	0.389706
Benign	7	151875101	A	T	p.?	c.7443-6T>A	KMT2C	splice_region_variant&intron_variant	2	2	27	1609.48	0.0233819	0.0492507	0.482143
Malignant	7	151945225	T	C	p.Glu765Gly	c.2294A>G	KMT2C	missense_variant	12	0	60	3152.48	0.0150827	0.0125928	0.441176
Benign	7	151945225	T	C	p.Glu765Gly	c.2294A>G	KMT2C	missense_variant	12	0	20	3444.35	0.0319948	0.0279328	0.357143
Malignant	1	120539916	G	A	p.Pro152Leu	c.455C>T	NOTCH2	missense_variant	.	.	67	1295.54	0.0102239	0.00370063	0.492647
Benign	1	120539916	G	A	p.Pro152Leu	c.455C>T	NOTCH2	missense_variant	.	.	12	1294.92	0.0118341	0.00430274	0.214286
Malignant	1	237905585	T	A	.	c.11092-11T>A	RYR2	splice_region_variant&intron_variant	.	.	53	1100.57	0.00720729	0.00189336	0.389706
Benign	1	237905585	T	A	.	c.11092-11T>A	RYR2	splice_region_variant&intron_variant	.	.	26	1184.19	0.00721456	0.0015809	0.464286
Malignant	11	119148859	AT	A	.	c.1096-9delT	CBL	splice_region_variant&intron_variant	.	.	61	820.246	0.0097268	0.0033128	0.448529
Benign	11	119148859	AT	A	.	c.1096-9delT	CBL	splice_region_variant&intron_variant	.	.	18	798.889	0.0116523	0.00392638	0.321429
Malignant	17	29482988	CT	C	.	c.61-4delT	NF1	splice_region_variant&intron_variant	.	.	62	1058.63	0.00783305	0.00248667	0.455882
Benign	17	29482988	CT	C	.	c.61-4delT	NF1	splice_region_variant&intron_variant	.	.	17	951.647	0.00891754	0.00299111	0.303571
Malignant	1	27101270	C	T	p.Pro1518Ser	c.4552C>T	ARID1A	missense_variant	1	0	57	2176.54	0.00733159	0.00191277	0.419118
Benign	1	27101270	C	T	p.Pro1518Ser	c.4552C>T	ARID1A	missense_variant	1	0	21	1930.62	0.00770477	0.00198178	0.375
Malignant	7	140439756	G	GA	.	c.1993-11dupT	BRAF	splice_region_variant&intron_variant	.	.	51	1085.76	0.0074435	0.00209821	0.375
Benign	7	140439756	G	GA	.	c.1993-11dupT	BRAF	splice_region_variant&intron_variant	.	.	27	1024.74	0.00950068	0.00351833	0.482143
Malignant	7	151945024	T	C	p.Lys832Arg	c.2495A>G	KMT2C	missense_variant	.	.	60	5919.8	0.00725537	0.00226622	0.441176
Benign	7	151945024	T	C	p.Lys832Arg	c.2495A>G	KMT2C	missense_variant	.	.	18	6731	0.00634215	0.00117087	0.321429
Malignant	7	151962294	G	A	p.Ser338Leu	c.1013C>T	KMT2C	missense_variant&splice_region_variant	1	0	59	3285.32	0.0110222	0.00954102	0.433824
Benign	7	151962294	G	A	p.Ser338Leu	c.1013C>T	KMT2C	missense_variant&splice_region_variant	1	0	19	3380.37	0.0216175	0.0172659	0.339286
Malignant	11	1017471	C	T	p.Gly1777Asp	c.5330G>A	MUC6	missense_variant	1	0	56	13387.8	0.010021	0.00405517	0.411765
Benign	11	1017471	C	T	p.Gly1777Asp	c.5330G>A	MUC6	missense_variant	1	0	22	13076.8	0.0132825	0.00513754	0.392857
Malignant	1	27023672	T	G	p.Ser260Ala	c.778T>G	ARID1A	missense_variant	.	.	63	2533.1	0.00798528	0.00259248	0.463235
Benign	1	27023672	T	G	p.Ser260Ala	c.778T>G	ARID1A	missense_variant	.	.	14	2357.57	0.00736212	0.00188217	0.25
Malignant	7	11418807	A	G	p.Met1564Thr	c.4691T>C	THSD7A	missense_variant	.	.	63	2429.97	0.00708564	0.00173193	0.463235
Benign	7	11418807	A	G	p.Met1564Thr	c.4691T>C	THSD7A	missense_variant	.	.	14	2397.29	0.00763018	0.00261001	0.25
Malignant	11	1016977	G	A	p.His1942Tyr	c.5824C>T	MUC6	missense_variant	.	.	51	14660.5	0.00757597	0.00183592	0.375
Benign	11	1016977	G	A	p.His1942Tyr	c.5824C>T	MUC6	missense_variant	.	.	26	13242.7	0.00860358	0.00232967	0.464286
Malignant	1	182812452	C	A	p.Tyr45*	c.135C>A	DHX9	stop_gained	1	0	55	2192.95	0.00816402	0.00372482	0.404412
Benign	1	182812452	C	A	p.Tyr45*	c.135C>A	DHX9	stop_gained	1	0	21	2157.48	0.00766135	0.00189723	0.375
Malignant	1	237806606	GT	G	.	c.7222-12delT	RYR2	splice_region_variant&intron_variant	.	.	50	1785.28	0.00691072	0.00173496	0.367647
Benign	1	237806606	GT	G	.	c.7222-12delT	RYR2	splice_region_variant&intron_variant	.	.	26	2052.35	0.00631813	0.00118056	0.464286
Malignant	11	1651615	A	C	p.Tyr182Ser	c.545A>C	KRTAP5-5	missense_variant	2	0	61	1941.33	0.0146966	0.00587555	0.448529
Benign	11	1651615	A	C	p.Tyr182Ser	c.545A>C	KRTAP5-5	missense_variant	2	0	14	1534.79	0.0156636	0.00791058	0.25
Malignant	17	29663625	T	TA	.	c.6148-17dupA	NF1	splice_region_variant&intron_variant	.	.	60	982.083	0.123673	0.066423	0.441176
Benign	17	29663625	T	TA	.	c.6148-17dupA	NF1	splice_region_variant&intron_variant	.	.	15	1047.33	0.0888662	0.0728734	0.267857
Malignant	9	79922876	G	T	p.Glu1326*	c.3976G>T	VPS13A	stop_gained	1	0	52	1243.1	0.00755059	0.00227676	0.382353
Benign	9	79922876	G	T	p.Glu1326*	c.3976G>T	VPS13A	stop_gained	1	0	22	1395.64	0.00714505	0.00154786	0.392857
Malignant	11	1017596	T	G	p.Gln1735His	c.5205A>C	MUC6	missense_variant	12	0	57	8496.96	0.110838	0.0324731	0.419118
Benign	11	1017596	T	G	p.Gln1735His	c.5205A>C	MUC6	missense_variant	12	0	16	9128.06	0.120185	0.033936	0.285714
Malignant	11	1017655	G	A	p.Pro1716Ser	c.5146C>T	MUC6	missense_variant	15	0	57	5651.16	0.0963349	0.032659	0.419118
Benign	11	1017655	G	A	p.Pro1716Ser	c.5146C>T	MUC6	missense_variant	15	0	16	6055.69	0.103459	0.0294437	0.285714
Malignant	19	1223183	G	A	.	c.1108+12G>A	STK11	splice_region_variant&intron_variant	.	.	45	2177.16	0.00813908	0.00312523	0.330882
Benign	19	1223183	G	A	.	c.1108+12G>A	STK11	splice_region_variant&intron_variant	.	.	28	2113.75	0.0105376	0.00479309	0.5
Malignant	1	237965213	C	A	p.Asp4716Glu	c.14148C>A	RYR2	missense_variant	.	.	48	1243.88	0.00753232	0.00289137	0.352941
Benign	1	237965213	C	A	p.Asp4716Glu	c.14148C>A	RYR2	missense_variant	.	.	24	1338.17	0.00860563	0.00276678	0.428571
Malignant	2	141457967	A	T	p.Asn2217Lys	c.6651T>A	LRP1B	missense_variant	1	0	44	2375.07	0.00694197	0.00167412	0.323529
Benign	2	141457967	A	T	p.Asn2217Lys	c.6651T>A	LRP1B	missense_variant	1	0	28	2420.29	0.0103384	0.00275203	0.5
Malignant	11	1017552	T	C	p.His1750Arg	c.5249A>G	MUC6	missense_variant	7	0	56	9763.39	0.105528	0.0349062	0.411765
Benign	11	1017552	T	C	p.His1750Arg	c.5249A>G	MUC6	missense_variant	7	0	16	10583.9	0.111547	0.0332144	0.285714
Malignant	13	48954282	CTT	C	.	c.1422-9_1422-8delTT	RB1	splice_region_variant&intron_variant	.	.	56	808.929	0.00935304	0.00292182	0.411765
Benign	13	48954282	CTT	C	.	c.1422-9_1422-8delTT	RB1	splice_region_variant&intron_variant	.	.	16	763.562	0.00990627	0.00353326	0.285714
Malignant	2	141474402	G	GA	.	c.5759-18dupT	LRP1B	splice_region_variant&intron_variant	.	.	56	1431.59	0.173846	0.0372584	0.411765
Benign	2	141474402	G	GA	.	c.5759-18dupT	LRP1B	splice_region_variant&intron_variant	.	.	15	1444.73	0.179144	0.0183683	0.267857
Malignant	2	29474102	G	C	p.Ser691Arg	c.2073C>G	ALK	missense_variant	.	.	54	1947.65	0.0072403	0.00175692	0.397059
Benign	2	29474102	G	C	p.Ser691Arg	c.2073C>G	ALK	missense_variant	.	.	16	1735.25	0.00724961	0.00176317	0.285714
Malignant	2	116283454	G	T	.	c.418-20G>T	DPP10	splice_region_variant&intron_variant	.	.	45	1098.93	0.00786808	0.00227099	0.330882
Benign	2	116283454	G	T	.	c.418-20G>T	DPP10	splice_region_variant&intron_variant	.	.	24	1021.08	0.00906208	0.00289219	0.428571
Malignant	3	178937755	T	C	p.Tyr644His	c.1930T>C	PIK3CA	missense_variant	.	.	46	1446.24	0.067711	0.0277486	0.338235
Benign	3	178937755	T	C	p.Tyr644His	c.1930T>C	PIK3CA	missense_variant	.	.	23	1248.87	0.0736841	0.0295497	0.410714
Malignant	9	79820249	C	A	p.Pro70Thr	c.208C>A	VPS13A	missense_variant	.	.	38	1229.82	0.00731188	0.00248283	0.279412
Benign	9	79820249	C	A	p.Pro70Thr	c.208C>A	VPS13A	missense_variant	.	.	30	1237.83	0.00738267	0.00197744	0.535714
Malignant	7	151882672	C	A	p.Ala1685Ser	c.5053G>T	KMT2C	missense_variant	15	0	46	2413.52	0.129086	0.0346951	0.338235
Benign	7	151882672	C	A	p.Ala1685Ser	c.5053G>T	KMT2C	missense_variant	13	0	21	1993.62	0.142068	0.0262018	0.375
Malignant	7	55259439	T	G	p.Leu833Val	c.2497T>G	EGFR	missense_variant	23	23	44	2737.98	0.00793658	0.00347946	0.323529
Benign	7	55259439	T	G	p.Leu833Val	c.2497T>G	EGFR	missense_variant	22	22	22	2560.5	0.00630755	0.00118781	0.392857
Malignant	7	151945051	A	G	p.Ile823Thr	c.2468T>C	KMT2C	missense_variant	3	0	45	6925.58	0.00708343	0.00198828	0.330882
Benign	7	151945051	A	G	p.Ile823Thr	c.2468T>C	KMT2C	missense_variant	3	0	21	8156.81	0.00881284	0.00340356	0.375
Malignant	10	43609934	T	A	p.Leu629Gln	c.1886T>A	RET	missense_variant	3	0	50	3449.04	0.00708541	0.00143747	0.367647
Benign	10	43609934	T	A	p.Leu629Gln	c.1886T>A	RET	missense_variant	3	0	16	3253.12	0.00670042	0.00092942	0.285714
Malignant	11	1017112	G	A	p.Pro1897Ser	c.5689C>T	MUC6	missense_variant	.	.	53	14522.4	0.0330856	0.00933473	0.389706
Benign	11	1017112	G	A	p.Pro1897Ser	c.5689C>T	MUC6	missense_variant	.	.	13	11255.6	0.0337199	0.00646877	0.232143
Malignant	21	10920067	T	C	.	c.1170+17A>G	TPTE	splice_region_variant&intron_variant	.	.	54	3406.28	0.172027	0.0196497	0.397059
Benign	21	10920067	T	C	.	c.1170+17A>G	TPTE	splice_region_variant&intron_variant	.	.	11	3284.82	0.170116	0.0111071	0.196429
Malignant	1	27023856	A	C	p.Gln321Pro	c.962A>C	ARID1A	missense_variant	.	.	54	2961.69	0.00662713	0.0013674	0.397059
Benign	1	27023856	A	C	p.Gln321Pro	c.962A>C	ARID1A	missense_variant	.	.	10	2036.9	0.00628277	0.000822685	0.178571
Malignant	1	237619875	ATTT	A	.	c.1477-13_1477-11delTTT	RYR2	splice_region_variant&intron_variant	.	.	42	1730.69	0.0161587	0.00618665	0.308824
Benign	1	237619875	ATTT	A	.	c.1477-13_1477-11delTTT	RYR2	splice_region_variant&intron_variant	.	.	22	1929	0.0172306	0.00679659	0.392857
Malignant	6	70900048	G	T	p.Lys1019Asn	c.3057G>T	COL19A1	missense_variant	.	.	48	1181.48	0.00803377	0.00241319	0.352941
Benign	6	70900048	G	T	p.Lys1019Asn	c.3057G>T	COL19A1	missense_variant	.	.	16	1290.69	0.00720102	0.0012355	0.285714
Malignant	9	139399492	T	G	p.Ser1551Arg	c.4651A>C	NOTCH1	missense_variant	.	.	42	2859.05	0.0065929	0.00144986	0.308824
Benign	9	139399492	T	G	p.Ser1551Arg	c.4651A>C	NOTCH1	missense_variant	.	.	22	2841.55	0.00647005	0.00119364	0.392857
Malignant	9	139413048	C	T	p.Arg365His	c.1094G>A	NOTCH1	missense_variant	.	.	58	1444.86	0.00886796	0.00250512	0.426471
Benign	9	139413048	C	T	p.Arg365His	c.1094G>A	NOTCH1	missense_variant	.	.	6	1306.67	0.00780122	0.00184334	0.107143
Malignant	19	1220728	G	GC	.	c.734+19dupC	STK11	splice_region_variant&intron_variant	.	.	41	2688.73	0.00679967	0.00200664	0.301471
Benign	19	1220728	G	GC	.	c.734+19dupC	STK11	splice_region_variant&intron_variant	.	.	23	3047.7	0.00713432	0.00173718	0.410714
Malignant	21	44513243	G	A	p.Ser231Leu	c.692C>T	U2AF1	missense_variant	4	0	46	2390.35	0.0106848	0.00593199	0.338235
Benign	21	44513243	G	A	p.Ser231Leu	c.692C>T	U2AF1	missense_variant	4	0	18	2563.94	0.0141682	0.00576245	0.321429
Malignant	1	158636175	T	A	p.Lys717Asn	c.2151A>T	SPTA1	missense_variant	.	.	47	2449.02	0.00976006	0.00531497	0.345588
Benign	1	158636175	T	A	p.Lys717Asn	c.2151A>T	SPTA1	missense_variant	.	.	16	2047.88	0.00711914	0.00201838	0.285714
Malignant	1	237619875	A	AT	.	c.1477-11dupT	RYR2	splice_region_variant&intron_variant	.	.	44	1762.45	0.171342	0.0591356	0.323529
Benign	1	237619875	A	AT	.	c.1477-11dupT	RYR2	splice_region_variant&intron_variant	.	.	19	1810.21	0.165762	0.0663114	0.339286
Malignant	11	1017592	G	C	p.Arg1737Gly	c.5209C>G	MUC6	missense_variant	6	0	45	8272.58	0.00833828	0.00348744	0.330882
Benign	11	1017592	G	C	p.Arg1737Gly	c.5209C>G	MUC6	missense_variant	6	0	18	8352.06	0.00838414	0.00319866	0.321429
Malignant	21	10970003	G	A	p.?	c.119+6C>T	TPTE	splice_region_variant&intron_variant	6	0	51	2797.53	0.162322	0.0185638	0.375
Benign	21	10970003	G	A	p.?	c.119+6C>T	TPTE	splice_region_variant&intron_variant	6	0	12	2477.17	0.170764	0.0208044	0.214286
Malignant	8	113516209	G	A	.	c.4896-3C>T	CSMD3	splice_region_variant&intron_variant	.	.	47	1514.66	0.204993	0.0181386	0.345588
Benign	8	113516209	G	A	.	c.4896-3C>T	CSMD3	splice_region_variant&intron_variant	.	.	15	1565.33	0.203878	0.0173188	0.267857
Malignant	9	79922845	C	CT	.	c.3961-6dupT	VPS13A	splice_region_variant&intron_variant	.	.	44	1235.86	0.0431399	0.00902182	0.323529
Benign	9	79922845	C	CT	.	c.3961-6dupT	VPS13A	splice_region_variant&intron_variant	.	.	18	1069.06	0.0450189	0.00812946	0.321429
Malignant	11	1017485	G	T	p.Asn1772Lys	c.5316C>A	MUC6	missense_variant	.	.	43	13319.5	0.0090464	0.00446127	0.316176
Benign	11	1017485	G	T	p.Asn1772Lys	c.5316C>A	MUC6	missense_variant	.	.	19	12956.5	0.0111982	0.00409403	0.339286
Malignant	11	1017519	A	G	p.Val1761Ala	c.5282T>C	MUC6	missense_variant	.	.	43	10863.7	0.00710382	0.00242669	0.316176
Benign	11	1017519	A	G	p.Val1761Ala	c.5282T>C	MUC6	missense_variant	.	.	19	10698.4	0.00734518	0.00152686	0.339286
Malignant	11	1651161	T	C	p.Cys31Arg	c.91T>C	KRTAP5-5	missense_variant	29	0	50	2938.66	0.164113	0.0277564	0.367647
Benign	11	1651161	T	C	p.Cys31Arg	c.91T>C	KRTAP5-5	missense_variant	29	0	12	1985.25	0.169093	0.0140281	0.214286
Malignant	17	29528423	C	A	.	c.1186-6C>A	NF1	splice_region_variant&intron_variant	.	.	48	812.854	0.00857681	0.00260592	0.352941
Benign	17	29528423	C	A	.	c.1186-6C>A	NF1	splice_region_variant&intron_variant	.	.	14	754.643	0.00927935	0.00271572	0.25
Malignant	21	10959806	G	T	p.?	c.174-6C>A	TPTE	splice_region_variant&intron_variant	3	0	51	3517.8	0.132262	0.0182871	0.375
Benign	21	10959806	G	T	p.?	c.174-6C>A	TPTE	splice_region_variant&intron_variant	3	0	11	3374.82	0.147165	0.0259273	0.196429
Malignant	21	10942923	G	A	p.Arg222Trp	c.664C>T	TPTE	missense_variant	7	0	44	3817.66	0.137116	0.0380602	0.323529
Benign	21	10942923	G	A	p.Arg222Trp	c.664C>T	TPTE	missense_variant	7	0	17	3610.06	0.15134	0.0434726	0.303571
Malignant	1	158637865	G	GAA	.	c.1834-15_1834-14dupTT	SPTA1	splice_region_variant&intron_variant	.	.	46	1343.8	0.0105675	0.00415524	0.338235
Benign	1	158637865	G	GAA	.	c.1834-15_1834-14dupTT	SPTA1	splice_region_variant&intron_variant	.	.	14	1384.5	0.00914793	0.00428191	0.25
Malignant	1	182812410	CTTT	C	.	c.112-7_112-5delTTT	DHX9	splice_region_variant&intron_variant	.	.	47	1808.7	0.00626222	0.00125124	0.345588
Benign	1	182812410	CTTT	C	.	c.112-7_112-5delTTT	DHX9	splice_region_variant&intron_variant	.	.	13	1602.54	0.00664829	0.00147315	0.232143
Malignant	7	32249155	G	GAA	.	c.86-6_86-5dupTT	PDE1C	splice_region_variant&intron_variant	.	.	43	1969.74	0.0064718	0.00121003	0.316176
Benign	7	32249155	G	GAA	.	c.86-6_86-5dupTT	PDE1C	splice_region_variant&intron_variant	.	.	17	1851.06	0.00655869	0.000698348	0.303571
Malignant	2	167279922	C	A	p.Met958Ile	c.2874G>T	SCN7A	missense_variant	2	0	46	881.435	0.163014	0.0309155	0.338235
Benign	2	167279922	C	A	p.Met958Ile	c.2874G>T	SCN7A	missense_variant	2	0	13	866.692	0.150468	0.0416118	0.232143
Malignant	3	47147496	C	A	p.Lys1610Asn	c.4830G>T	SETD2	missense_variant	1	0	36	1412.28	0.00717611	0.00196141	0.264706
Benign	3	47147496	C	A	p.Lys1610Asn	c.4830G>T	SETD2	missense_variant	1	0	23	2500.43	0.00692918	0.00131357	0.410714
Malignant	7	14775821	TG	T	p.?	c.169-3delC	DGKB	splice_region_variant&intron_variant	34	0	42	1910.55	0.215377	0.015418	0.308824
Benign	7	14775821	TG	T	p.?	c.169-3delC	DGKB	splice_region_variant&intron_variant	34	0	17	1881.41	0.219777	0.0150616	0.303571
Malignant	11	1017451	G	C	p.His1784Asp	c.5350C>G	MUC6	missense_variant	1	0	40	14063.9	0.00836973	0.00330823	0.294118
Benign	11	1017451	G	C	p.His1784Asp	c.5350C>G	MUC6	missense_variant	1	0	19	13698.7	0.0110312	0.0038301	0.339286
Malignant	9	21974702	T	G	p.Asn42Thr	c.125A>C	CDKN2A	missense_variant	1	0	35	4409.86	0.0073839	0.00213676	0.257353
Benign	9	21974702	T	G	p.Asn42Thr	c.125A>C	CDKN2A	missense_variant	1	0	23	4204.22	0.00924623	0.00255171	0.410714
Malignant	11	1016944	G	C	p.His1953Asp	c.5857C>G	MUC6	missense_variant	1	0	40	16030	0.00652823	0.00195383	0.294118
Benign	11	1016944	G	C	p.His1953Asp	c.5857C>G	MUC6	missense_variant	1	0	18	16270.4	0.00618487	0.000724459	0.321429
Malignant	11	1017597	T	G	p.Gln1735Pro	c.5204A>C	MUC6	missense_variant	5	0	42	8118.21	0.00789288	0.00324748	0.308824
Benign	11	1017597	T	G	p.Gln1735Pro	c.5204A>C	MUC6	missense_variant	5	0	16	8340.44	0.0083507	0.00313983	0.285714
Malignant	2	141232923	A	G	.	c.9426-17T>C	LRP1B	splice_region_variant&intron_variant	.	.	48	1326.25	0.00829029	0.00264192	0.352941
Benign	2	141232923	A	G	.	c.9426-17T>C	LRP1B	splice_region_variant&intron_variant	.	.	9	1492.89	0.00707796	0.00148911	0.160714
Malignant	8	139165463	CA	C	p.?	c.1259-5delT	FAM135B	splice_region_variant&intron_variant	1	0	45	1547.93	0.195244	0.0514693	0.330882
Benign	8	139165463	CA	C	p.?	c.1259-5delT	FAM135B	splice_region_variant&intron_variant	1	0	12	1513.58	0.207842	0.0132616	0.214286
Malignant	11	1017474	G	A	p.Thr1776Ile	c.5327C>T	MUC6	missense_variant	.	.	37	13293	0.00754098	0.00235697	0.272059
Benign	11	1017474	G	A	p.Thr1776Ile	c.5327C>T	MUC6	missense_variant	.	.	20	12247	0.00862438	0.00196155	0.357143
Malignant	11	1017595	A	C	p.Ser1736Ala	c.5206T>G	MUC6	missense_variant	4	0	46	8222.13	0.00915782	0.00730964	0.338235
Benign	11	1017595	A	C	p.Ser1736Ala	c.5206T>G	MUC6	missense_variant	4	0	11	7011.18	0.0104554	0.00514787	0.196429
Malignant	11	1651140	T	C	p.Cys24Arg	c.70T>C	KRTAP5-5	missense_variant	5	1	44	3245.02	0.0137764	0.0305407	0.323529
Benign	11	1651140	T	C	p.Cys24Arg	c.70T>C	KRTAP5-5	missense_variant	5	1	13	2494.54	0.00971938	0.00393761	0.232143
Malignant	1	237619893	G	T	.	c.1477-7G>T	RYR2	splice_region_variant&intron_variant	.	.	42	2235.1	0.00753123	0.00256744	0.308824
Benign	1	237619893	G	T	.	c.1477-7G>T	RYR2	splice_region_variant&intron_variant	.	.	14	2011.64	0.00676437	0.00172178	0.25
Malignant	3	47125339	T	G	p.Glu1977Asp	c.5931A>C	SETD2	missense_variant	.	.	43	1690.88	0.00865091	0.00378307	0.316176
Benign	3	47125339	T	G	p.Glu1977Asp	c.5931A>C	SETD2	missense_variant	.	.	13	2499.77	0.00710957	0.00122994	0.232143
Malignant	5	170837513	CTTT	C	.	c.847-7_847-5delTTT	NPM1	splice_region_variant&intron_variant	.	.	33	1313.85	0.00736622	0.00298328	0.242647
Benign	5	170837513	CTTT	C	.	c.847-7_847-5delTTT	NPM1	splice_region_variant&intron_variant	.	.	23	1804.52	0.00788628	0.00260516	0.410714
Malignant	7	151851363	G	C	p.Thr4043Ser	c.12128C>G	KMT2C	missense_variant	.	.	43	1821.12	0.00826224	0.00314641	0.316176
Benign	7	151851363	G	C	p.Thr4043Ser	c.12128C>G	KMT2C	missense_variant	.	.	13	2781.38	0.00672594	0.00171488	0.232143
Malignant	8	139165463	C	CA	.	c.1259-5dupT	FAM135B	splice_region_variant&intron_variant	.	.	43	1580.21	0.0155558	0.00526368	0.316176
Benign	8	139165463	C	CA	.	c.1259-5dupT	FAM135B	splice_region_variant&intron_variant	.	.	13	1451.08	0.0140535	0.00512653	0.232143
Malignant	17	37868593	T	A	p.Met347Lys	c.1040T>A	ERBB2	missense_variant	.	.	45	2084.82	0.00700868	0.00149958	0.330882
Benign	17	37868593	T	A	p.Met347Lys	c.1040T>A	ERBB2	missense_variant	.	.	11	1865.73	0.00612643	0.00100697	0.196429
Malignant	6	117631463	TTAA	T	.	c.6234-22_6234-20delTTA	ROS1	splice_region_variant&intron_variant	.	.	40	1867.65	0.00814452	0.00206126	0.294118
Benign	6	117631463	TTAA	T	.	c.6234-22_6234-20delTTA	ROS1	splice_region_variant&intron_variant	.	.	15	1538.67	0.00778847	0.00196104	0.267857
Malignant	7	14775824	A	C	p.?	c.169-5T>G	DGKB	splice_region_variant&intron_variant	20	14	39	1861.44	0.221368	0.0143581	0.286765
Benign	7	14775824	A	C	p.?	c.169-5T>G	DGKB	splice_region_variant&intron_variant	20	14	16	1865.31	0.225674	0.0148187	0.285714
Malignant	1	120611964	G	C	p.Cys19Trp	c.57C>G	NOTCH2	missense_variant	39	0	41	5649.51	0.199694	0.0200101	0.301471
Benign	1	120611964	G	C	p.Cys19Trp	c.57C>G	NOTCH2	missense_variant	39	0	13	4907.31	0.204658	0.0201815	0.232143
Malignant	4	1807213	G	C	.	c.1540+10G>C	FGFR3	splice_region_variant&intron_variant	.	.	34	2583.35	0.00784443	0.0025273	0.25
Benign	4	1807213	G	C	.	c.1540+10G>C	FGFR3	splice_region_variant&intron_variant	.	.	19	3541.53	0.00962622	0.0032587	0.339286
Malignant	5	45696092	G	T	p.Ala35Asp	c.104C>A	HCN1	missense_variant	1	0	41	4847.24	0.00658328	0.00131413	0.301471
Benign	5	45696092	G	T	p.Ala35Asp	c.104C>A	HCN1	missense_variant	1	0	12	3249.42	0.00652767	0.00136438	0.214286
Malignant	7	151945291	G	A	p.Pro743Leu	c.2228C>T	KMT2C	missense_variant	3	0	36	2484.58	0.0104646	0.00644314	0.264706
Benign	7	151945291	G	A	p.Pro743Leu	c.2228C>T	KMT2C	missense_variant	3	0	17	2905.59	0.0115231	0.00575967	0.303571
Malignant	7	151970959	G	A	p.?	c.850-7C>T	KMT2C	splice_region_variant&intron_variant	7	0	40	4247.48	0.0169359	0.00582216	0.294118
Benign	7	151970959	G	A	p.?	c.850-7C>T	KMT2C	splice_region_variant&intron_variant	7	0	13	5653	0.0167694	0.00707563	0.232143
Malignant	8	51314766	G	T	.	c.28-4G>T	SNTG1	splice_region_variant&intron_variant	.	.	37	1890.16	0.00750829	0.0027492	0.272059
Benign	8	51314766	G	T	.	c.28-4G>T	SNTG1	splice_region_variant&intron_variant	.	.	15	2080.47	0.00681327	0.00146489	0.267857
Malignant	11	1017466	T	A	p.Arg1779*	c.5335A>T	MUC6	stop_gained	.	.	33	13468.6	0.0076493	0.0025816	0.242647
Benign	11	1017466	T	A	p.Arg1779*	c.5335A>T	MUC6	stop_gained	.	.	19	12852.3	0.00861276	0.00175237	0.339286
Malignant	2	80136796	T	C	p.Ile310Thr	c.929T>C	CTNNA2	missense_variant	1	0	36	4487.72	0.00620104	0.00106181	0.264706
Benign	2	80136796	T	C	p.Ile310Thr	c.929T>C	CTNNA2	missense_variant	1	0	15	3396.6	0.00638125	0.00107003	0.267857
Malignant	8	51314775	G	T	p.Lys11Asn	c.33G>T	SNTG1	missense_variant	2	0	40	1931.22	0.0077933	0.00336519	0.294118
Benign	8	51314775	G	T	p.Lys11Asn	c.33G>T	SNTG1	missense_variant	2	0	11	2145.91	0.00685604	0.001313	0.196429
Malignant	11	1017489	G	A	p.Pro1771Leu	c.5312C>T	MUC6	missense_variant	.	.	32	13319	0.00736973	0.00213936	0.235294
Benign	11	1017489	G	A	p.Pro1771Leu	c.5312C>T	MUC6	missense_variant	.	.	19	12593.9	0.00848181	0.00192425	0.339286
Malignant	11	1651228	C	G	p.Ala53Gly	c.158C>G	KRTAP5-5	missense_variant	8	0	43	2554.91	0.223993	0.0376335	0.316176
Benign	11	1651228	C	G	p.Ala53Gly	c.158C>G	KRTAP5-5	missense_variant	8	0	8	1767.5	0.228863	0.01883	0.142857
Malignant	5	112175418	A	G	p.Tyr1376Cys	c.4127A>G	APC	missense_variant	.	.	27	2052.04	0.00688715	0.0018385	0.198529
Benign	5	112175418	A	G	p.Tyr1376Cys	c.4127A>G	APC	missense_variant	.	.	22	2449.77	0.00733382	0.00235259	0.392857
Malignant	19	10610077	A	C	p.Phe211Leu	c.633T>G	KEAP1	missense_variant	1	0	33	1978	0.00839389	0.00459256	0.242647
Benign	19	10610077	A	C	p.Phe211Leu	c.633T>G	KEAP1	missense_variant	1	0	16	1754.56	0.00722872	0.00195679	0.285714
Malignant	1	120458752	G	C	p.Ala2198Gly	c.6593C>G	NOTCH2	missense_variant	.	.	36	1681.19	0.00682391	0.00182837	0.264706
Benign	1	120458752	G	C	p.Ala2198Gly	c.6593C>G	NOTCH2	missense_variant	.	.	12	1654.67	0.00649553	0.00105578	0.214286
Malignant	2	141598474	A	T	.	c.5114+13T>A	LRP1B	splice_region_variant&intron_variant	.	.	36	1512.19	0.00672193	0.00125538	0.264706
Benign	2	141598474	A	T	.	c.5114+13T>A	LRP1B	splice_region_variant&intron_variant	.	.	12	1601.92	0.00635305	0.00125049	0.214286
Malignant	7	55241604	TC	T	p.?	c.2062-3delC	EGFR	splice_region_variant&intron_variant	4	0	27	2157.44	0.0064636	0.00146682	0.198529
Benign	7	55241604	TC	T	p.?	c.2062-3delC	EGFR	splice_region_variant&intron_variant	4	0	21	2277.81	0.00660013	0.00147501	0.375
Malignant	11	1651677	A	T	p.Ser203Cys	c.607A>T	KRTAP5-5	missense_variant	.	.	37	1846.51	0.00719161	0.00240086	0.272059
Benign	11	1651677	A	T	p.Ser203Cys	c.607A>T	KRTAP5-5	missense_variant	.	.	11	1955.09	0.00657441	0.00133512	0.196429
Malignant	1	237850768	C	A	p.Leu3011Ile	c.9031C>A	RYR2	missense_variant	.	.	35	1137.34	0.00661618	0.00132468	0.257353
Benign	1	237850768	C	A	p.Leu3011Ile	c.9031C>A	RYR2	missense_variant	.	.	12	1444.58	0.00578394	0.00069459	0.214286
Malignant	2	116257190	G	T	.	c.417+10G>T	DPP10	splice_region_variant&intron_variant	.	.	26	866.962	0.00741462	0.00209481	0.191176
Benign	2	116257190	G	T	.	c.417+10G>T	DPP10	splice_region_variant&intron_variant	.	.	21	1021.52	0.00844884	0.00250758	0.375
Malignant	2	141294285	GAAA	G	.	c.7514-10_7514-8delTTT	LRP1B	splice_region_variant&intron_variant	.	.	32	1776.19	0.00671582	0.00114106	0.235294
Benign	2	141294285	GAAA	G	.	c.7514-10_7514-8delTTT	LRP1B	splice_region_variant&intron_variant	.	.	15	1422.8	0.00677955	0.00121569	0.267857
Malignant	3	10191482	A	G	p.Lys159Glu	c.475A>G	VHL	missense_variant	5	0	30	1451.63	0.00947592	0.00575941	0.220588
Benign	3	10191482	A	G	p.Lys159Glu	c.475A>G	VHL	missense_variant	5	0	17	1302.35	0.00838084	0.00220912	0.303571
Malignant	4	1801016	T	G	p.Leu49Val	c.145T>G	FGFR3	missense_variant	.	.	32	1665.34	0.00813098	0.00291065	0.235294
Benign	4	1801016	T	G	p.Leu49Val	c.145T>G	FGFR3	missense_variant	.	.	15	1524.6	0.00744499	0.00210454	0.267857
Malignant	6	117631463	T	TTAA	.	c.6234-22_6234-20dupTTA	ROS1	splice_region_variant&intron_variant	.	.	41	1472.49	0.229433	0.0190926	0.301471
Benign	6	117631463	T	TTAA	.	c.6234-22_6234-20dupTTA	ROS1	splice_region_variant&intron_variant	.	.	6	1323.5	0.232177	0.0168594	0.107143
Malignant	6	117686918	CA	C	.	c.2813-15delT	ROS1	splice_region_variant&intron_variant	.	.	35	1027.77	0.00755457	0.00205718	0.257353
Benign	6	117686918	CA	C	.	c.2813-15delT	ROS1	splice_region_variant&intron_variant	.	.	12	962.833	0.00642547	0.00156279	0.214286
Malignant	9	79954406	TTTTG	T	.	c.6379-22_6379-19delGTTT	VPS13A	splice_region_variant&intron_variant	.	.	30	1374.63	0.00748085	0.00247407	0.220588
Benign	9	79954406	TTTTG	T	.	c.6379-22_6379-19delGTTT	VPS13A	splice_region_variant&intron_variant	.	.	17	1645.12	0.0082727	0.00337492	0.303571
Malignant	11	1016605	C	A	p.Val2066Leu	c.6196G>T	MUC6	missense_variant	.	.	35	3702.86	0.0105857	0.00469855	0.257353
Benign	11	1016605	C	A	p.Val2066Leu	c.6196G>T	MUC6	missense_variant	.	.	12	2747.42	0.00984891	0.00322884	0.214286
Malignant	11	1016776	C	T	p.Val2009Ile	c.6025G>A	MUC6	missense_variant	26	0	35	19591	0.219188	0.0196115	0.257353
Benign	11	1016776	C	T	p.Val2009Ile	c.6025G>A	MUC6	missense_variant	26	0	12	13985.5	0.219431	0.0150313	0.214286
Malignant	11	20668389	G	T	p.Arg660Ile	c.1979G>T	SLC6A5	missense_variant	1	0	40	1551.33	0.00699578	0.00203618	0.294118
Benign	11	20668389	G	T	p.Arg660Ile	c.1979G>T	SLC6A5	missense_variant	1	0	7	1258.86	0.00632761	0.00112605	0.125
Malignant	18	48575128	G	T	p.Glu108*	c.322G>T	SMAD4	stop_gained	2	0	28	1394.64	0.00718188	0.00195437	0.205882
Benign	18	48575128	G	T	p.Glu108*	c.322G>T	SMAD4	stop_gained	2	0	19	1258.53	0.00709116	0.00198105	0.339286
Malignant	1	158614024	C	A	.	c.4338+19G>T	SPTA1	splice_region_variant&intron_variant	.	.	35	1665.09	0.009156	0.00622888	0.257353
Benign	1	158614024	C	A	.	c.4338+19G>T	SPTA1	splice_region_variant&intron_variant	.	.	11	1816.64	0.00780519	0.00187876	0.196429
Malignant	7	151945228	G	A	p.Ser764Phe	c.2291C>T	KMT2C	missense_variant	2	0	29	3088	0.014736	0.0140659	0.213235
Benign	7	151945228	G	A	p.Ser764Phe	c.2291C>T	KMT2C	missense_variant	2	0	17	3669.18	0.0330004	0.0240307	0.303571
Malignant	2	29416379	T	G	p.Lys1525Thr	c.4574A>C	ALK	missense_variant	.	.	35	1998.51	0.0119395	0.00628498	0.257353
Benign	2	29416379	T	G	p.Lys1525Thr	c.4574A>C	ALK	missense_variant	.	.	10	1726	0.00926851	0.00313683	0.178571
Malignant	12	43826277	TAA	T	.	c.2932-8_2932-7delTT	ADAMTS20	splice_region_variant&intron_variant	.	.	33	2368.15	0.00692923	0.0012847	0.242647
Benign	12	43826277	TAA	T	.	c.2932-8_2932-7delTT	ADAMTS20	splice_region_variant&intron_variant	.	.	12	2161	0.00735302	0.00203361	0.214286
Malignant	2	141259447	G	GA	.	c.8663-5dupT	LRP1B	splice_region_variant&intron_variant	.	.	34	1884.62	0.00625934	0.000932653	0.25
Benign	2	141259447	G	GA	.	c.8663-5dupT	LRP1B	splice_region_variant&intron_variant	.	.	10	1679.3	0.00744899	0.0018067	0.178571
Malignant	11	1016577	T	A	p.His2075Leu	c.6224A>T	MUC6	missense_variant	.	.	35	2817.66	0.00719478	0.00291873	0.257353
Benign	11	1016577	T	A	p.His2075Leu	c.6224A>T	MUC6	missense_variant	.	.	9	2748.11	0.00721794	0.00142186	0.160714
Malignant	1	237619890	A	T	.	c.1477-10A>T	RYR2	splice_region_variant&intron_variant	.	.	34	1966.18	0.00693947	0.00164105	0.25
Benign	1	237619890	A	T	.	c.1477-10A>T	RYR2	splice_region_variant&intron_variant	.	.	9	2246.56	0.00672729	0.00188144	0.160714
Malignant	7	151874157	G	T	p.Pro2794Gln	c.8381C>A	KMT2C	missense_variant	.	.	26	1568.96	0.00840686	0.00343143	0.191176
Benign	7	151874157	G	T	p.Pro2794Gln	c.8381C>A	KMT2C	missense_variant	.	.	17	2334.18	0.00628644	0.000886805	0.303571
Malignant	17	29422394	G	C	.	c.60+7G>C	NF1	splice_region_variant&intron_variant	.	.	31	1060.58	0.00767996	0.00182489	0.227941
Benign	17	29422394	G	C	.	c.60+7G>C	NF1	splice_region_variant&intron_variant	.	.	12	901.667	0.00741037	0.00209702	0.214286
Malignant	17	29559093	A	T	p.Asp1067Val	c.3200A>T	NF1	missense_variant&splice_region_variant	.	.	34	636.912	0.0104459	0.00424991	0.25
Benign	17	29559093	A	T	p.Asp1067Val	c.3200A>T	NF1	missense_variant&splice_region_variant	.	.	9	589.556	0.00967018	0.0028719	0.160714
Malignant	1	237995903	G	A	p.Ala4954Thr	c.14860G>A	RYR2	missense_variant	1	0	22	1669.59	0.006859	0.00229284	0.161765
Benign	1	237995903	G	A	p.Ala4954Thr	c.14860G>A	RYR2	missense_variant	1	0	20	1936.2	0.00666754	0.00133958	0.357143
Malignant	5	170837514	T	C	.	c.847-17T>C	NPM1	splice_region_variant&intron_variant	.	.	31	1368.39	0.00897632	0.00455949	0.227941
Benign	5	170837514	T	C	.	c.847-17T>C	NPM1	splice_region_variant&intron_variant	.	.	11	1805.55	0.00884733	0.00264125	0.196429
Malignant	6	70916974	A	C	p.Asn1142Thr	c.3425A>C	COL19A1	missense_variant	.	.	21	1635.43	0.00721647	0.00319981	0.154412
Benign	6	70916974	A	C	p.Asn1142Thr	c.3425A>C	COL19A1	missense_variant	.	.	21	2432.81	0.00674036	0.00125245	0.375
Malignant	11	1651684	T	C	p.Phe205Ser	c.614T>C	KRTAP5-5	missense_variant	1	0	31	1922.29	0.00736352	0.00170904	0.227941
Benign	11	1651684	T	C	p.Phe205Ser	c.614T>C	KRTAP5-5	missense_variant	1	0	11	1981.45	0.00617214	0.000876117	0.196429
Malignant	3	178927960	C	A	p.?	c.1252-14C>A	PIK3CA	splice_region_variant&intron_variant	1	0	24	1789.54	0.00743378	0.00546118	0.176471
Benign	3	178927960	C	A	p.?	c.1252-14C>A	PIK3CA	splice_region_variant&intron_variant	1	0	17	1767.24	0.00702607	0.00157152	0.303571
Malignant	6	117678087	GA	G	p.?	c.3855-10delT	ROS1	splice_region_variant&intron_variant	3	0	36	949.944	0.00705406	0.00200952	0.264706
Benign	6	117678087	GA	G	p.?	c.3855-10delT	ROS1	splice_region_variant&intron_variant	3	0	5	879	0.00659313	0.000900426	0.0892857
Malignant	8	139190943	C	CA	.	c.874-11dupT	FAM135B	splice_region_variant&intron_variant	.	.	31	1866.13	0.227318	0.0142041	0.227941
Benign	8	139190943	C	CA	.	c.874-11dupT	FAM135B	splice_region_variant&intron_variant	.	.	10	1768.7	0.219954	0.0118085	0.178571
Malignant	10	89720677	T	A	p.Asn449Lys	c.1347T>A	PTEN	missense_variant	2	0	28	1683.04	0.00607997	0.00101554	0.205882
Benign	10	89720677	T	A	p.Asn449Lys	c.1347T>A	PTEN	missense_variant	2	0	13	1479.38	0.0061083	0.00101426	0.232143
Malignant	1	158636186	C	A	p.Asp714Tyr	c.2140G>T	SPTA1	missense_variant	2	0	28	2159.57	0.00997339	0.00584874	0.205882
Benign	1	158636186	C	A	p.Asp714Tyr	c.2140G>T	SPTA1	missense_variant	2	0	12	2433.33	0.00750222	0.00298657	0.214286
Malignant	9	139396181	T	C	.	c.5638+19A>G	NOTCH1	splice_region_variant&intron_variant	.	.	31	1353.39	0.00690366	0.00179351	0.227941
Benign	9	139396181	T	C	.	c.5638+19A>G	NOTCH1	splice_region_variant&intron_variant	.	.	9	1280.78	0.00662661	0.00164841	0.160714
Malignant	11	1017504	G	A	p.Thr1766Ile	c.5297C>T	MUC6	missense_variant	.	.	20	11474.4	0.00766577	0.00288178	0.147059
Benign	11	1017504	G	A	p.Thr1766Ile	c.5297C>T	MUC6	missense_variant	.	.	20	11256.4	0.00692353	0.00157751	0.357143
Malignant	17	7578486	A	C	p.Asp148Glu	c.444T>G	TP53	missense_variant	2	0	25	4492.08	0.00669955	0.00207213	0.183824
Benign	17	7578486	A	C	p.Asp148Glu	c.444T>G	TP53	missense_variant	2	0	15	4565.07	0.00626114	0.000893611	0.267857
Malignant	5	19571949	GA	G	p.?	c.1000-9delT	CDH18	splice_region_variant&intron_variant	3	0	25	1265.84	0.00660222	0.00196256	0.183824
Benign	5	19571949	GA	G	p.?	c.1000-9delT	CDH18	splice_region_variant&intron_variant	3	0	14	1407.07	0.0081518	0.00238123	0.25
Malignant	6	117686918	C	CA	.	c.2813-15dupT	ROS1	splice_region_variant&intron_variant	.	.	35	1086.37	0.0071634	0.00190902	0.257353
Benign	6	117686918	C	CA	.	c.2813-15dupT	ROS1	splice_region_variant&intron_variant	.	.	4	896	0.0061555	0.00038058	0.0714286
Malignant	7	32338264	T	G	p.Ile28Ile	c.84A>C	PDE1C	splice_region_variant&synonymous_variant	.	.	34	2957.21	0.00769857	0.00481222	0.25
Benign	7	32338264	T	G	p.Ile28Ile	c.84A>C	PDE1C	splice_region_variant&synonymous_variant	.	.	5	2316.6	0.00734323	0.00153235	0.0892857
Malignant	21	10951438	CAAAT	C	.	c.285-15_285-12delATTT	TPTE	splice_region_variant&intron_variant	.	.	27	2909.04	0.00629365	0.00125076	0.198529
Benign	21	10951438	CAAAT	C	.	c.285-15_285-12delATTT	TPTE	splice_region_variant&intron_variant	.	.	12	2834.25	0.00656756	0.000969256	0.214286
Malignant	2	141272360	G	GAA	.	c.8150-21_8150-20dupTT	LRP1B	splice_region_variant&intron_variant	.	.	28	2687.11	0.0222108	0.0129464	0.205882
Benign	2	141272360	G	GAA	.	c.8150-21_8150-20dupTT	LRP1B	splice_region_variant&intron_variant	.	.	10	2232.8	0.0237342	0.0165674	0.178571
Malignant	1	157805915	C	T	p.Gly29Asp	c.86G>A	CD5L	missense_variant	.	.	27	2693.7	0.00680013	0.00190404	0.198529
Benign	1	157805915	C	T	p.Gly29Asp	c.86G>A	CD5L	missense_variant	.	.	10	2697.2	0.00651874	0.00103709	0.178571
Malignant	1	237905588	A	T	.	c.11092-8A>T	RYR2	splice_region_variant&intron_variant	.	.	26	942.231	0.00714594	0.00182415	0.191176
Benign	1	237905588	A	T	.	c.11092-8A>T	RYR2	splice_region_variant&intron_variant	.	.	11	1081.45	0.00661872	0.00114167	0.196429
Malignant	2	116283454	GT	G	.	c.418-11delT	DPP10	splice_region_variant&intron_variant	.	.	22	1250.91	0.00650708	0.00122229	0.161765
Benign	2	116283454	GT	G	.	c.418-11delT	DPP10	splice_region_variant&intron_variant	.	.	15	1092.53	0.00740308	0.0015934	0.267857
Malignant	8	38277111	G	C	p.Phe439Leu	c.1317C>G	FGFR1	missense_variant	.	.	15	1987.2	0.0103495	0.00433189	0.110294
Benign	8	38277111	G	C	p.Phe439Leu	c.1317C>G	FGFR1	missense_variant	.	.	22	2605.14	0.00942312	0.00314529	0.392857
Malignant	17	29496961	G	T	p.Glu178*	c.532G>T	NF1	stop_gained	1	0	25	738.92	0.00848369	0.00243379	0.183824
Benign	17	29496961	G	T	p.Glu178*	c.532G>T	NF1	stop_gained	1	0	12	662.667	0.00812851	0.00189021	0.214286
Malignant	21	10906915	C	T	p.Gly549Glu	c.1646G>A	TPTE	missense_variant	6	0	30	6759.93	0.142827	0.0218116	0.220588
Benign	21	10906915	C	T	p.Gly549Glu	c.1646G>A	TPTE	missense_variant	6	0	7	5532.71	0.171258	0.0483726	0.125
Malignant	21	10908903	GA	G	.	c.1450-9delT	TPTE	splice_region_variant&intron_variant	.	.	27	3110.3	0.00600591	0.00112683	0.198529
Benign	21	10908903	GA	G	.	c.1450-9delT	TPTE	splice_region_variant&intron_variant	.	.	10	3150.8	0.00630006	0.000523944	0.178571
Malignant	10	89720672	G	T	p.Val448Leu	c.1342G>T	PTEN	missense_variant	1	0	23	1750.39	0.00611095	0.000965491	0.169118
Benign	10	89720672	G	T	p.Val448Leu	c.1342G>T	PTEN	missense_variant	1	0	13	1379.15	0.00682869	0.00122725	0.232143
Malignant	17	10448752	A	C	p.Val139Gly	c.416T>G	MYH2	missense_variant	1	0	23	2451.87	0.00832565	0.00386845	0.169118
Benign	17	10448752	A	C	p.Val139Gly	c.416T>G	MYH2	missense_variant	1	0	13	2588.85	0.00658165	0.00155768	0.232143
Malignant	17	29663625	TA	T	.	c.6148-17delA	NF1	splice_region_variant&intron_variant	.	.	30	945.9	0.0128188	0.0079401	0.220588
Benign	17	29663625	TA	T	.	c.6148-17delA	NF1	splice_region_variant&intron_variant	.	.	6	1056.83	0.0183952	0.0127644	0.107143
Malignant	1	120539781	G	A	p.Thr197Ile	c.590C>T	NOTCH2	missense_variant	.	.	27	1437.63	0.00823069	0.00292886	0.198529
Benign	1	120539781	G	A	p.Thr197Ile	c.590C>T	NOTCH2	missense_variant	.	.	8	1245.5	0.0084702	0.00328418	0.142857
Malignant	1	158583674	GA	G	.	c.6843-18delT	SPTA1	splice_region_variant&intron_variant	.	.	20	1732.6	0.00640876	0.0012667	0.147059
Benign	1	158583674	GA	G	.	c.6843-18delT	SPTA1	splice_region_variant&intron_variant	.	.	14	2383.36	0.00594516	0.000873381	0.25
Malignant	3	178938877	G	A	p.Glu707Lys	c.2119G>A	PIK3CA	missense_variant	1	0	25	2429.28	0.00839166	0.00310018	0.183824
Benign	3	178938877	G	A	p.Glu707Lys	c.2119G>A	PIK3CA	missense_variant	1	0	8	1876.5	0.00928932	0.00305265	0.142857
Malignant	5	45696038	T	G	p.His53Pro	c.158A>C	HCN1	missense_variant	.	.	28	4851.32	0.0065078	0.00127941	0.205882
Benign	5	45696038	T	G	p.His53Pro	c.158A>C	HCN1	missense_variant	.	.	5	3636.6	0.0054507	0.000374468	0.0892857
Malignant	9	79955305	A	T	.	c.6880-15A>T	VPS13A	splice_region_variant&intron_variant	.	.	21	1490.67	0.00939172	0.00428591	0.154412
Benign	9	79955305	A	T	.	c.6880-15A>T	VPS13A	splice_region_variant&intron_variant	.	.	12	1450.33	0.00745618	0.00263235	0.214286
Malignant	9	139401198	A	C	p.Phe1291Val	c.3871T>G	NOTCH1	missense_variant	1	0	26	2649.54	0.00696529	0.00211031	0.191176
Benign	9	139401198	A	C	p.Phe1291Val	c.3871T>G	NOTCH1	missense_variant	1	0	7	2676	0.00580358	0.000719699	0.125
Malignant	17	37856577	T	G	.	c.73+13T>G	ERBB2	splice_region_variant&intron_variant	.	.	21	3233.43	0.00591975	0.000811934	0.154412
Benign	17	37856577	T	G	.	c.73+13T>G	ERBB2	splice_region_variant&intron_variant	.	.	12	3098.33	0.00584093	0.000624413	0.214286
Malignant	9	21974696	T	G	p.Tyr44Ser	c.131A>C	CDKN2A	missense_variant	1	0	26	4464.38	0.00640228	0.00131227	0.191176
Benign	9	21974696	T	G	p.Tyr44Ser	c.131A>C	CDKN2A	missense_variant	1	0	6	3777.5	0.00628018	0.00120074	0.107143
Malignant	9	139403339	T	G	p.Thr1052Pro	c.3154A>C	NOTCH1	missense_variant	1	0	24	1907.5	0.00732321	0.00270394	0.176471
Benign	9	139403339	T	G	p.Thr1052Pro	c.3154A>C	NOTCH1	missense_variant	1	0	8	2668.38	0.00643735	0.00100886	0.142857
Malignant	11	1651393	C	G	p.Ala108Gly	c.323C>G	KRTAP5-5	missense_variant	1	0	26	810.115	0.00777362	0.00285729	0.191176
Benign	11	1651393	C	G	p.Ala108Gly	c.323C>G	KRTAP5-5	missense_variant	1	0	6	635.333	0.00794394	0.00256015	0.107143
Malignant	17	29663667	G	T	p.Met2054Ile	c.6162G>T	NF1	missense_variant	.	.	25	1099.52	0.00765178	0.00262293	0.183824
Benign	17	29663667	G	T	p.Met2054Ile	c.6162G>T	NF1	missense_variant	.	.	7	1162.86	0.00628084	0.00056231	0.125
Malignant	X	29935717	AT	A	p.?	c.911+12delT	IL1RAPL1	splice_region_variant&intron_variant	1	0	16	1243.31	0.00624652	0.000863405	0.117647
Benign	X	29935717	AT	A	p.?	c.911+12delT	IL1RAPL1	splice_region_variant&intron_variant	1	0	16	1686	0.00723828	0.0016816	0.285714
Malignant	1	115251293	GA	G	.	c.451-19delT	NRAS	splice_region_variant&intron_variant	.	.	18	1512.89	0.00590733	0.000780032	0.132353
Benign	1	115251293	GA	G	.	c.451-19delT	NRAS	splice_region_variant&intron_variant	.	.	13	1807	0.0066052	0.00104428	0.232143
Malignant	1	158636157	C	A	p.Gln723His	c.2169G>T	SPTA1	missense_variant	1	0	24	2127.58	0.00789049	0.00318998	0.176471
Benign	1	158636157	C	A	p.Gln723His	c.2169G>T	SPTA1	missense_variant	1	0	7	1870.86	0.00618286	0.000757581	0.125
Malignant	1	237951451	A	G	.	c.13476+16A>G	RYR2	splice_region_variant&intron_variant	.	.	23	1278	0.216193	0.047712	0.169118
Benign	1	237951451	A	G	.	c.13476+16A>G	RYR2	splice_region_variant&intron_variant	.	.	8	1406.75	0.233379	0.0136924	0.142857
Malignant	7	151945334	T	C	p.Asn729Asp	c.2185A>G	KMT2C	missense_variant	20	2	12	1944.42	0.0411489	0.0219224	0.0882353
Benign	7	151945334	T	C	p.Asn729Asp	c.2185A>G	KMT2C	missense_variant	20	2	19	2820	0.0533278	0.0208597	0.339286
Malignant	1	237905585	TA	T	.	c.11092-8delA	RYR2	splice_region_variant&intron_variant	.	.	20	1000.35	0.00599348	0.000832853	0.147059
Benign	1	237905585	TA	T	.	c.11092-8delA	RYR2	splice_region_variant&intron_variant	.	.	10	1137.2	0.00650187	0.000960751	0.178571
Malignant	7	152055766	G	A	p.?	c.162-6C>T	KMT2C	splice_region_variant&intron_variant	5	0	11	1130.55	0.0178254	0.00626104	0.0808824
Benign	7	152055766	G	A	p.?	c.162-6C>T	KMT2C	splice_region_variant&intron_variant	5	0	19	1461.84	0.0240798	0.00355891	0.339286
Malignant	11	1017591	C	A	p.Arg1737Leu	c.5210G>T	MUC6	missense_variant	.	.	25	8580.8	0.00792109	0.00467987	0.183824
Benign	11	1017591	C	A	p.Arg1737Leu	c.5210G>T	MUC6	missense_variant	.	.	5	8064.6	0.0068502	0.00167156	0.0892857
Malignant	12	25378716	GA	G	p.?	c.291-10delT	KRAS	splice_region_variant&intron_variant	2	0	14	1900.93	0.00831756	0.00274335	0.102941
Benign	12	25378716	GA	G	p.?	c.291-10delT	KRAS	splice_region_variant&intron_variant	2	0	16	2432.25	0.00661301	0.00179173	0.285714
Malignant	1	237617779	G	T	p.Gly461Cys	c.1381G>T	RYR2	missense_variant	.	.	24	1854.92	0.00927805	0.00629629	0.176471
Benign	1	237617779	G	T	p.Gly461Cys	c.1381G>T	RYR2	missense_variant	.	.	5	2030.8	0.00675347	0.00127391	0.0892857
Malignant	2	167313369	G	T	.	c.1290+11C>A	SCN7A	splice_region_variant&intron_variant	.	.	19	854.474	0.00747511	0.00322101	0.139706
Benign	2	167313369	G	T	.	c.1290+11C>A	SCN7A	splice_region_variant&intron_variant	.	.	10	807.8	0.0070576	0.00162448	0.178571
Malignant	3	47125882	C	A	.	c.5398-10G>T	SETD2	splice_region_variant&intron_variant	.	.	10	1218.5	0.0185381	0.00609572	0.0735294
Benign	3	47125882	C	A	.	c.5398-10G>T	SETD2	splice_region_variant&intron_variant	.	.	19	1513.53	0.0135444	0.00375857	0.339286
Malignant	4	1807898	A	C	p.Asn655His	c.1963A>C	FGFR3	missense_variant	1	0	10	3738.6	0.0102064	0.00155741	0.0735294
Benign	4	1807898	A	C	p.Asn655His	c.1963A>C	FGFR3	missense_variant	1	0	19	3936.89	0.00919241	0.00200006	0.339286
Malignant	7	140434574	C	A	.	c.2128-4G>T	BRAF	splice_region_variant&intron_variant	.	.	10	1081.8	0.0566144	0.0126127	0.0735294
Benign	7	140434574	C	A	.	c.2128-4G>T	BRAF	splice_region_variant&intron_variant	.	.	19	1606.63	0.0620948	0.0128863	0.339286
Malignant	7	140434587	AAAAAAAAAAG	A	.	c.2128-27_2128-18delCTTTTTTTTT	BRAF	splice_region_variant&intron_variant	.	.	23	1323.09	0.0399232	0.0534451	0.169118
Benign	7	140434587	AAAAAAAAAAG	A	.	c.2128-27_2128-18delCTTTTTTTTT	BRAF	splice_region_variant&intron_variant	.	.	6	1428	0.0179897	0.0074477	0.107143
Malignant	8	113516196	C	A	p.Glu1636*	c.4906G>T	CSMD3	stop_gained	1	1	10	1655.5	0.0116418	0.00421038	0.0735294
Benign	8	113516196	C	A	p.Glu1636*	c.4906G>T	CSMD3	stop_gained	1	1	19	2190.37	0.0135269	0.0025679	0.339286
Malignant	10	43606933	A	T	.	c.1522+20A>T	RET	splice_region_variant&intron_variant	.	.	10	5767.8	0.0250044	0.00338603	0.0735294
Benign	10	43606933	A	T	.	c.1522+20A>T	RET	splice_region_variant&intron_variant	.	.	19	5512.32	0.024544	0.00359209	0.339286
Malignant	10	89692790	G	T	p.Asp265Tyr	c.793G>T	PTEN	missense_variant	5	0	26	1495.38	0.00701516	0.00309592	0.191176
Benign	10	89692790	G	T	p.Asp265Tyr	c.793G>T	PTEN	missense_variant	5	0	3	2142.67	0.00599703	0.000724711	0.0535714
Malignant	17	29508460	G	T	p.Ala203Ser	c.607G>T	NF1	missense_variant	.	.	20	1079.85	0.00681157	0.00186177	0.147059
Benign	17	29508460	G	T	p.Ala203Ser	c.607G>T	NF1	missense_variant	.	.	9	1002.67	0.00685095	0.00119578	0.160714
Malignant	22	24176311	C	T	.	c.1146-17C>T	SMARCB1	splice_region_variant&intron_variant	.	.	28	3119.18	0.00841679	0.00330153	0.205882
Benign	22	24176311	C	T	.	c.1146-17C>T	SMARCB1	splice_region_variant&intron_variant	.	.	1	3503	0.00570939	0	0.0178571
Malignant	1	158584103	G	A	p.?	c.6789-7C>T	SPTA1	splice_region_variant&intron_variant	1	0	10	1008.4	0.0410737	0.01985	0.0735294
Benign	1	158584103	G	A	p.?	c.6789-7C>T	SPTA1	splice_region_variant&intron_variant	1	0	18	1364.22	0.0333203	0.0179923	0.321429
Malignant	1	158627255	C	A	.	c.2805+12G>T	SPTA1	splice_region_variant&intron_variant	.	.	16	694.312	0.00699523	0.00193726	0.117647
Benign	1	158627255	C	A	.	c.2805+12G>T	SPTA1	splice_region_variant&intron_variant	.	.	12	807.333	0.00741679	0.00103737	0.214286
Malignant	1	158637846	G	T	p.Gln614Lys	c.1840C>A	SPTA1	missense_variant	1	0	9	1535.11	0.00927755	0.00269821	0.0661765
Benign	1	158637846	G	T	p.Gln614Lys	c.1840C>A	SPTA1	missense_variant	1	0	19	2054.47	0.0142636	0.00489875	0.339286
Malignant	4	55593628	G	T	p.Gly565Val	c.1694G>T	KIT	missense_variant	1	0	12	1699.25	0.00935831	0.00354121	0.0882353
Benign	4	55593628	G	T	p.Gly565Val	c.1694G>T	KIT	missense_variant	1	0	16	2633.38	0.00745852	0.00168913	0.285714
Malignant	5	170837527	C	T	p.?	c.847-4C>T	NPM1	splice_region_variant&intron_variant	1	0	15	1189.13	0.00670334	0.00177917	0.110294
Benign	5	170837527	C	T	p.?	c.847-4C>T	NPM1	splice_region_variant&intron_variant	1	0	13	1674.92	0.00665255	0.00114751	0.232143
Malignant	6	70916830	ATT	A	.	c.3302-12_3302-11delTT	COL19A1	splice_region_variant&intron_variant	.	.	23	2161	0.00703587	0.00266351	0.169118
Benign	6	70916830	ATT	A	.	c.3302-12_3302-11delTT	COL19A1	splice_region_variant&intron_variant	.	.	5	2066.2	0.00717677	0.00158066	0.0892857
Malignant	14	105241426	A	T	p.Val185Asp	c.554T>A	AKT1	missense_variant	1	0	22	3441.73	0.00596798	0.00119502	0.161765
Benign	14	105241426	A	T	p.Val185Asp	c.554T>A	AKT1	missense_variant	1	0	6	2722.5	0.00579098	0.000884177	0.107143
Malignant	21	10942911	G	A	p.?	c.666+10C>T	TPTE	splice_region_variant&intron_variant	2	0	26	3435.27	0.0818279	0.0115312	0.191176
Benign	21	10942911	G	A	p.?	c.666+10C>T	TPTE	splice_region_variant&intron_variant	2	0	2	2680	0.0616251	0.0154713	0.0357143
Malignant	13	49039144	G	T	p.Arg741Leu	c.2222G>T	RB1	missense_variant	.	.	22	964.591	0.00662565	0.00138724	0.161765
Benign	13	49039144	G	T	p.Arg741Leu	c.2222G>T	RB1	missense_variant	.	.	5	859.8	0.00690619	0.00175888	0.0892857
Malignant	1	27088788	G	T	p.Gln799His	c.2397G>T	ARID1A	missense_variant	1	1	18	1363.56	0.00739669	0.00234448	0.132353
Benign	1	27088788	G	T	p.Gln799His	c.2397G>T	ARID1A	missense_variant	1	1	8	1032.88	0.00853044	0.00275586	0.142857
Malignant	6	152697706	C	T	.	c.9147-13G>A	SYNE1	splice_region_variant&intron_variant	.	.	22	1710.91	0.212958	0.0496684	0.161765
Benign	6	152697706	C	T	.	c.9147-13G>A	SYNE1	splice_region_variant&intron_variant	.	.	4	1757.5	0.221693	0.0246015	0.0714286
Malignant	7	151875095	T	A	p.Arg2481Ser	c.7443A>T	KMT2C	missense_variant	11	0	7	1311.29	0.00989106	0.00156521	0.0514706
Benign	7	151875095	T	A	p.Arg2481Ser	c.7443A>T	KMT2C	missense_variant	11	0	19	1863.11	0.00983281	0.00296292	0.339286
Malignant	9	133747512	G	T	.	c.880-4G>T	ABL1	splice_region_variant&intron_variant	.	.	13	1358.77	0.00725931	0.00186703	0.0955882
Benign	9	133747512	G	T	.	c.880-4G>T	ABL1	splice_region_variant&intron_variant	.	.	13	1511.54	0.00631859	0.00119206	0.232143
Malignant	10	43606912	A	T	p.Ser507Ser	c.1521A>T	RET	splice_region_variant&synonymous_variant	.	.	9	5648.89	0.00750262	0.00103626	0.0661765
Benign	10	43606912	A	T	p.Ser507Ser	c.1521A>T	RET	splice_region_variant&synonymous_variant	.	.	17	5412.53	0.00729119	0.00148729	0.303571
Malignant	12	25378716	G	GA	p.?	c.291-10dupT	KRAS	splice_region_variant&intron_variant	1	0	13	2017.69	0.00581495	0.000972683	0.0955882
Benign	12	25378716	G	GA	p.?	c.291-10dupT	KRAS	splice_region_variant&intron_variant	1	0	13	1644.92	0.00657702	0.00099869	0.232143
Malignant	17	29559088	C	T	.	c.3198-3C>T	NF1	splice_region_variant&intron_variant	.	.	24	603.5	0.00914769	0.00325515	0.176471
Benign	17	29559088	C	T	.	c.3198-3C>T	NF1	splice_region_variant&intron_variant	.	.	2	562.5	0.00804843	0.00121083	0.0357143
Malignant	19	10600377	T	G	p.Glu493Ala	c.1478A>C	KEAP1	missense_variant	1	1	23	2740.13	0.00738706	0.00307375	0.169118
Benign	19	10600377	T	G	p.Glu493Ala	c.1478A>C	KEAP1	missense_variant	1	1	3	2356.67	0.00559573	0.000522345	0.0535714
Malignant	1	158618455	G	A	.	c.3570-12C>T	SPTA1	splice_region_variant&intron_variant	.	.	20	1578.95	0.23543	0.0134701	0.147059
Benign	1	158618455	G	A	.	c.3570-12C>T	SPTA1	splice_region_variant&intron_variant	.	.	5	1645.6	0.241459	0.00770172	0.0892857
Malignant	1	237905570	C	CTTT	.	c.11092-13_11092-11dupTTT	RYR2	splice_region_variant&intron_variant	.	.	16	820.5	0.00796505	0.00213727	0.117647
Benign	1	237905570	C	CTTT	.	c.11092-13_11092-11dupTTT	RYR2	splice_region_variant&intron_variant	.	.	9	1111.89	0.0103179	0.00404034	0.160714
Malignant	7	151891317	G	T	p.Pro1513Thr	c.4537C>A	KMT2C	missense_variant	1	0	7	1384.29	0.0107977	0.00316295	0.0514706
Benign	7	151891317	G	T	p.Pro1513Thr	c.4537C>A	KMT2C	missense_variant	1	0	18	2004.89	0.0117558	0.00346779	0.321429
Malignant	7	151945330	G	T	p.Ser730Tyr	c.2189C>A	KMT2C	missense_variant	7	0	10	2034.9	0.0124597	0.0044403	0.0735294
Benign	7	151945330	G	T	p.Ser730Tyr	c.2189C>A	KMT2C	missense_variant	7	0	15	2669.27	0.0182577	0.00998204	0.267857
Malignant	9	79954410	G	GTTT	.	c.6379-10_6379-8dupTTT	VPS13A	splice_region_variant&intron_variant	.	.	21	1532.29	0.00759799	0.00273442	0.154412
Benign	9	79954410	G	GTTT	.	c.6379-10_6379-8dupTTT	VPS13A	splice_region_variant&intron_variant	.	.	4	1409.75	0.00998297	0.00711203	0.0714286
Malignant	17	7578452	T	G	p.Met160Leu	c.478A>C	TP53	missense_variant	3	0	7	3773.86	0.00779049	0.0012719	0.0514706
Benign	17	7578452	T	G	p.Met160Leu	c.478A>C	TP53	missense_variant	3	0	18	3959.22	0.00777115	0.00160723	0.321429
Malignant	17	29685491	C	A	p.?	c.7971-7C>A	NF1	splice_region_variant&intron_variant	1	0	22	929.636	0.00685568	0.00182382	0.161765
Benign	17	29685491	C	A	p.?	c.7971-7C>A	NF1	splice_region_variant&intron_variant	1	0	3	860.333	0.00577754	0.000639573	0.0535714
Malignant	19	11113806	G	T	p.Gln638His	c.1914G>T	SMARCA4	missense_variant	.	.	24	1413.58	0.0076536	0.0027907	0.176471
Benign	19	11113806	G	T	p.Gln638His	c.1914G>T	SMARCA4	missense_variant	.	.	1	733	0.00545703	0	0.0178571
Malignant	1	27057944	A	G	p.Tyr551Cys	c.1652A>G	ARID1A	missense_variant	.	.	20	1530.3	0.00796321	0.00270377	0.147059
Benign	1	27057944	A	G	p.Tyr551Cys	c.1652A>G	ARID1A	missense_variant	.	.	4	1350.25	0.00685754	0.00242714	0.0714286
Malignant	1	158627279	T	G	p.Glu931Asp	c.2793A>C	SPTA1	missense_variant	2	0	18	834	0.00673526	0.00144078	0.132353
Benign	1	158627279	T	G	p.Glu931Asp	c.2793A>C	SPTA1	missense_variant	2	0	6	1151.17	0.00673879	0.00144013	0.107143
Malignant	2	140990904	G	GA	.	c.13660-10dupT	LRP1B	splice_region_variant&intron_variant	.	.	20	1700	0.00630853	0.000746189	0.147059
Benign	2	140990904	G	GA	.	c.13660-10dupT	LRP1B	splice_region_variant&intron_variant	.	.	4	1518.75	0.00702498	0.00182326	0.0714286
Malignant	6	117678083	A	G	p.?	c.3855-5T>C	ROS1	splice_region_variant&intron_variant	2	1	20	1021.7	0.227649	0.0152138	0.147059
Benign	6	117678083	A	G	p.?	c.3855-5T>C	ROS1	splice_region_variant&intron_variant	2	1	4	1139.5	0.210693	0.0241577	0.0714286
Malignant	7	140434572	T	TA	.	c.2128-3dupT	BRAF	splice_region_variant&intron_variant	.	.	9	1093.22	0.0107519	0.00554521	0.0661765
Benign	7	140434572	T	TA	.	c.2128-3dupT	BRAF	splice_region_variant&intron_variant	.	.	15	1750.2	0.00927414	0.00695335	0.267857
Malignant	7	140434577	AAAAAAAAAG	A	.	c.2128-16_2128-8delCTTTTTTTT	BRAF	splice_region_variant&intron_variant	.	.	18	1329.44	0.00926136	0.00333915	0.132353
Benign	7	140434577	AAAAAAAAAG	A	.	c.2128-16_2128-8delCTTTTTTTT	BRAF	splice_region_variant&intron_variant	.	.	6	1476.5	0.0086075	0.00262496	0.107143
Malignant	7	151945007	C	T	p.Gly838Ser	c.2512G>A	KMT2C	missense_variant	28	1	16	4380	0.233596	0.012787	0.117647
Benign	7	151945007	C	T	p.Gly838Ser	c.2512G>A	KMT2C	missense_variant	28	1	8	4511	0.213278	0.0411797	0.142857
Malignant	9	21974753	A	C	p.Val25Gly	c.74T>G	CDKN2A	missense_variant	2	0	9	4621.44	0.00798633	0.00212439	0.0661765
Benign	9	21974753	A	C	p.Val25Gly	c.74T>G	CDKN2A	missense_variant	2	0	15	5105.27	0.00802909	0.00188705	0.267857
Malignant	9	139392018	A	T	.	c.6181-8T>A	NOTCH1	splice_region_variant&intron_variant	.	.	8	2073.25	0.00815123	0.00132559	0.0588235
Benign	9	139392018	A	T	.	c.6181-8T>A	NOTCH1	splice_region_variant&intron_variant	.	.	16	2277.38	0.0100087	0.00272299	0.285714
Malignant	9	139395062	T	G	p.Asn1959Thr	c.5876A>C	NOTCH1	missense_variant	1	1	14	2734.93	0.0062662	0.00140097	0.102941
Benign	9	139395062	T	G	p.Asn1959Thr	c.5876A>C	NOTCH1	missense_variant	1	1	10	2786.2	0.00610763	0.00119598	0.178571
Malignant	9	139407566	T	G	p.Ile792Leu	c.2374A>C	NOTCH1	missense_variant	.	.	15	1149.67	0.00656339	0.00219276	0.110294
Benign	9	139407566	T	G	p.Ile792Leu	c.2374A>C	NOTCH1	missense_variant	.	.	9	856	0.00725357	0.00161681	0.160714
Malignant	11	1651235	T	G	p.Cys55Trp	c.165T>G	KRTAP5-5	missense_variant	.	.	17	2402.24	0.00617787	0.000990106	0.125
Benign	11	1651235	T	G	p.Cys55Trp	c.165T>G	KRTAP5-5	missense_variant	.	.	7	1701.86	0.0053969	0.000379311	0.125
Malignant	11	1651483	G	C	p.Gly138Ala	c.413G>C	KRTAP5-5	missense_variant	6	1	20	637.7	0.011393	0.00477962	0.147059
Benign	11	1651483	G	C	p.Gly138Ala	c.413G>C	KRTAP5-5	missense_variant	6	1	4	540.25	0.0101688	0.000659008	0.0714286
Malignant	X	29972647	G	T	p.Asp404Tyr	c.1210G>T	IL1RAPL1	missense_variant	1	0	18	1318.06	0.00749075	0.00403919	0.132353
Benign	X	29972647	G	T	p.Asp404Tyr	c.1210G>T	IL1RAPL1	missense_variant	1	0	6	1432.67	0.00630157	0.00140775	0.107143
Malignant	1	158590266	GA	G	.	c.6121-11delT	SPTA1	splice_region_variant&intron_variant	.	.	11	1531.09	0.00732919	0.00271061	0.0808824
Benign	1	158590266	GA	G	.	c.6121-11delT	SPTA1	splice_region_variant&intron_variant	.	.	12	2377.25	0.00623898	0.000646612	0.214286
Malignant	1	181767542	T	A	p.Tyr2172Asn	c.6514T>A	CACNA1E	missense_variant	1	1	21	3184.95	0.00702184	0.00184044	0.154412
Benign	1	181767542	T	A	p.Tyr2172Asn	c.6514T>A	CACNA1E	missense_variant	1	1	2	2249	0.00647202	0.000947161	0.0357143
Malignant	2	167333982	C	A	p.Lys75Asn	c.225G>T	SCN7A	missense_variant	1	0	14	1622.14	0.0056726	0.000604626	0.102941
Benign	2	167333982	C	A	p.Lys75Asn	c.225G>T	SCN7A	missense_variant	1	0	9	1714.33	0.00582799	0.000581196	0.160714
Malignant	7	152055764	C	A	p.?	c.162-4G>T	KMT2C	splice_region_variant&intron_variant	1	0	8	1204	0.00823746	0.00233454	0.0588235
Benign	7	152055764	C	A	p.?	c.162-4G>T	KMT2C	splice_region_variant&intron_variant	1	0	15	1602	0.00925524	0.00319706	0.267857
Malignant	8	51569580	C	A	p.Pro321Thr	c.961C>A	SNTG1	missense_variant	1	1	5	1226.2	0.00727983	0.0019632	0.0367647
Benign	8	51569580	C	A	p.Pro321Thr	c.961C>A	SNTG1	missense_variant	1	1	18	1241.11	0.0090544	0.00355677	0.321429
Malignant	8	139190950	G	A	.	c.874-17C>T	FAM135B	splice_region_variant&intron_variant	.	.	18	1691.44	0.0192119	0.0487252	0.132353
Benign	8	139190950	G	A	.	c.874-17C>T	FAM135B	splice_region_variant&intron_variant	.	.	5	1325.8	0.00825502	0.00200475	0.0892857
Malignant	11	1651154	T	G	p.Cys28Trp	c.84T>G	KRTAP5-5	missense_variant	.	.	20	2319.15	0.00743065	0.00228593	0.147059
Benign	11	1651154	T	G	p.Cys28Trp	c.84T>G	KRTAP5-5	missense_variant	.	.	3	2370	0.00561118	0.000150085	0.0535714
Malignant	13	48954233	C	A	.	c.1421+13C>A	RB1	splice_region_variant&intron_variant	.	.	18	610.944	0.0166122	0.00491915	0.132353
Benign	13	48954233	C	A	.	c.1421+13C>A	RB1	splice_region_variant&intron_variant	.	.	5	553.4	0.017637	0.00734652	0.0892857
Malignant	17	10439864	C	G	p.Val653Leu	c.1957G>C	MYH2	missense_variant	.	.	14	1719.43	0.00616549	0.000618296	0.102941
Benign	17	10439864	C	G	p.Val653Leu	c.1957G>C	MYH2	missense_variant	.	.	9	1831	0.00843614	0.00223105	0.160714
Malignant	18	48603056	A	G	p.Thr453Ala	c.1357A>G	SMAD4	missense_variant	.	.	12	1567.17	0.00678615	0.00150811	0.0882353
Benign	18	48603056	A	G	p.Thr453Ala	c.1357A>G	SMAD4	missense_variant	.	.	11	2069	0.00796979	0.00244315	0.196429
Malignant	21	10944801	C	CA	.	c.447-15dupT	TPTE	splice_region_variant&intron_variant	.	.	19	3864.47	0.00603007	0.00120093	0.139706
Benign	21	10944801	C	CA	.	c.447-15dupT	TPTE	splice_region_variant&intron_variant	.	.	4	3140.75	0.00607094	0.000527652	0.0714286
Malignant	2	212578393	A	G	.	c.884-20T>C	ERBB4	splice_region_variant&intron_variant	.	.	16	1480	0.00596484	0.000734946	0.117647
Benign	2	212578393	A	G	.	c.884-20T>C	ERBB4	splice_region_variant&intron_variant	.	.	6	1161.67	0.00773176	0.00311136	0.107143
Malignant	5	19571949	G	GA	.	c.1000-9dupT	CDH18	splice_region_variant&intron_variant	.	.	10	1170.4	0.00650795	0.000776119	0.0735294
Benign	5	19571949	G	GA	.	c.1000-9dupT	CDH18	splice_region_variant&intron_variant	.	.	12	1588.5	0.00640806	0.000954613	0.214286
Malignant	7	151859189	G	T	.	c.11460+13C>A	KMT2C	splice_region_variant&intron_variant	.	.	19	1634.05	0.0113486	0.00595326	0.139706
Benign	7	151859189	G	T	.	c.11460+13C>A	KMT2C	splice_region_variant&intron_variant	.	.	3	2140.67	0.00736634	0.00168651	0.0535714
Malignant	10	89685303	G	T	p.Lys239Asn	c.717G>T	PTEN	missense_variant	5	0	16	1842.81	0.00665469	0.00119879	0.117647
Benign	10	89685303	G	T	p.Lys239Asn	c.717G>T	PTEN	missense_variant	5	0	6	1587.67	0.00677263	0.00127797	0.107143
Malignant	17	29557853	T	C	p.?	c.3114-7T>C	NF1	splice_region_variant&intron_variant	2	0	17	633.824	0.00880801	0.00412719	0.125
Benign	17	29557853	T	C	p.?	c.3114-7T>C	NF1	splice_region_variant&intron_variant	2	0	5	584	0.0115641	0.00299542	0.0892857
Malignant	1	158587390	C	T	.	c.6549-12G>A	SPTA1	splice_region_variant&intron_variant	.	.	16	1330.94	0.240703	0.00850001	0.117647
Benign	1	158587390	C	T	.	c.6549-12G>A	SPTA1	splice_region_variant&intron_variant	.	.	5	1364.8	0.2292	0.0101314	0.0892857
Malignant	1	158614198	C	T	.	c.4195-12G>A	SPTA1	splice_region_variant&intron_variant	.	.	16	1603.19	0.222173	0.057194	0.117647
Benign	1	158614198	C	T	.	c.4195-12G>A	SPTA1	splice_region_variant&intron_variant	.	.	5	1431	0.234167	0.0134393	0.0892857
Malignant	1	237824140	G	T	p.Glu2777*	c.8329G>T	RYR2	stop_gained	1	0	17	1877.12	0.00733308	0.00389853	0.125
Benign	1	237824140	G	T	p.Glu2777*	c.8329G>T	RYR2	stop_gained	1	0	4	1515.5	0.00603858	0.000424764	0.0714286
Malignant	7	151875102	A	T	.	c.7443-7T>A	KMT2C	splice_region_variant&intron_variant	.	.	19	1588.16	0.020179	0.00871529	0.139706
Benign	7	151875102	A	T	.	c.7443-7T>A	KMT2C	splice_region_variant&intron_variant	.	.	2	1496	0.0139718	0.00610345	0.0357143
Malignant	8	113504923	G	A	.	c.5084-11C>T	CSMD3	splice_region_variant&intron_variant	.	.	16	2187.44	0.00680184	0.00132237	0.117647
Benign	8	113504923	G	A	.	c.5084-11C>T	CSMD3	splice_region_variant&intron_variant	.	.	5	1375.6	0.00584135	0.000730722	0.0892857
Malignant	9	21971107	T	G	p.Asp84Ala	c.251A>C	CDKN2A	missense_variant	.	.	12	4979.58	0.00592131	0.00110153	0.0882353
Benign	9	21971107	T	G	p.Asp84Ala	c.251A>C	CDKN2A	missense_variant	.	.	9	3975.11	0.00585639	0.000610515	0.160714
Malignant	10	89720709	C	A	p.Ser460*	c.1379C>A	PTEN	stop_gained	.	.	8	1242.12	0.00726994	0.00365614	0.0588235
Benign	10	89720709	C	A	p.Ser460*	c.1379C>A	PTEN	stop_gained	.	.	13	2070.85	0.00610831	0.0010358	0.232143
Malignant	12	43826277	T	A	.	c.2932-6A>T	ADAMTS20	splice_region_variant&intron_variant	.	.	14	1943.14	0.00603053	0.00114449	0.102941
Benign	12	43826277	T	A	.	c.2932-6A>T	ADAMTS20	splice_region_variant&intron_variant	.	.	7	2328.43	0.00609366	0.000712127	0.125
Malignant	1	27106078	C	G	p.Pro1897Ala	c.5689C>G	ARID1A	missense_variant	.	.	17	1418.18	0.00661231	0.0014282	0.125
Benign	1	27106078	C	G	p.Pro1897Ala	c.5689C>G	ARID1A	missense_variant	.	.	3	1794.33	0.00660407	0.00108208	0.0535714
Malignant	1	158584068	G	T	p.Leu2273Ile	c.6817C>A	SPTA1	missense_variant	1	1	8	1106.62	0.00861657	0.00404958	0.0588235
Benign	1	158584068	G	T	p.Leu2273Ile	c.6817C>A	SPTA1	missense_variant	1	1	12	1924.17	0.00754765	0.00158291	0.214286
Malignant	2	141272360	GAA	G	.	c.8150-21_8150-20delTT	LRP1B	splice_region_variant&intron_variant	.	.	16	2345.12	0.00769294	0.00264655	0.117647
Benign	2	141272360	GAA	G	.	c.8150-21_8150-20delTT	LRP1B	splice_region_variant&intron_variant	.	.	4	1672.5	0.00830479	0.00416412	0.0714286
Malignant	3	178919302	G	T	p.Glu263*	c.787G>T	PIK3CA	stop_gained	2	0	6	1530.67	0.00798864	0.00289055	0.0441176
Benign	3	178919302	G	T	p.Glu263*	c.787G>T	PIK3CA	stop_gained	2	0	14	2753.07	0.00761343	0.00199582	0.25
Malignant	8	113516220	G	A	.	c.4896-14C>T	CSMD3	splice_region_variant&intron_variant	.	.	5	1291.6	0.00725298	0.00205851	0.0367647
Benign	8	113516220	G	A	.	c.4896-14C>T	CSMD3	splice_region_variant&intron_variant	.	.	15	1744	0.00734399	0.00158938	0.267857
Malignant	8	139164172	T	G	p.Lys849Thr	c.2546A>C	FAM135B	missense_variant	.	.	15	2572.13	0.00729383	0.00282765	0.110294
Benign	8	139164172	T	G	p.Lys849Thr	c.2546A>C	FAM135B	missense_variant	.	.	5	2633.8	0.00666454	0.00223612	0.0892857
Malignant	13	28608250	T	G	p.Lys602Asn	c.1806A>C	FLT3	missense_variant	.	.	16	1486.81	0.00752072	0.00304665	0.117647
Benign	13	28608250	T	G	p.Lys602Asn	c.1806A>C	FLT3	missense_variant	.	.	4	1924.75	0.00586691	0.000520591	0.0714286
Malignant	X	29935717	A	AT	p.?	c.911+12dupT	IL1RAPL1	splice_region_variant&intron_variant	2	0	14	1275.36	0.00627367	0.0008086	0.102941
Benign	X	29935717	A	AT	p.?	c.911+12dupT	IL1RAPL1	splice_region_variant&intron_variant	2	0	6	1521	0.00654955	0.0012447	0.107143
Malignant	1	237823350	G	T	p.Lys2758Asn	c.8274G>T	RYR2	missense_variant	.	.	12	1555.92	0.00679958	0.00108622	0.0882353
Benign	1	237823350	G	T	p.Lys2758Asn	c.8274G>T	RYR2	missense_variant	.	.	7	1244.43	0.00633538	0.00155689	0.125
Malignant	7	140434588	AAAAAAAAAG	A	.	c.2128-27_2128-19delCTTTTTTTT	BRAF	splice_region_variant&intron_variant	.	.	14	1394.64	0.0107842	0.00464331	0.102941
Benign	7	140434588	AAAAAAAAAG	A	.	c.2128-27_2128-19delCTTTTTTTT	BRAF	splice_region_variant&intron_variant	.	.	5	1454.4	0.00796415	0.00163235	0.0892857
Malignant	7	140439756	GA	G	.	c.1993-11delT	BRAF	splice_region_variant&intron_variant	.	.	12	1051.33	0.00658869	0.00249634	0.0882353
Benign	7	140439756	GA	G	.	c.1993-11delT	BRAF	splice_region_variant&intron_variant	.	.	7	1099	0.00739833	0.00249174	0.125
Malignant	7	140624407	C	G	p.Ala33Pro	c.97G>C	BRAF	missense_variant	.	.	15	2277.07	0.00633068	0.00119397	0.110294
Benign	7	140624407	C	G	p.Ala33Pro	c.97G>C	BRAF	missense_variant	.	.	4	2195	0.00664735	0.00192067	0.0714286
Malignant	7	151875103	A	T	.	c.7443-8T>A	KMT2C	splice_region_variant&intron_variant	.	.	17	1517.12	0.0111024	0.00362821	0.125
Benign	7	151875103	A	T	.	c.7443-8T>A	KMT2C	splice_region_variant&intron_variant	.	.	2	1419.5	0.00795183	0.00180744	0.0357143
Malignant	7	151921131	C	A	p.Asp1098Tyr	c.3292G>T	KMT2C	missense_variant	1	0	11	1314	0.00751503	0.00311084	0.0808824
Benign	7	151921131	C	A	p.Asp1098Tyr	c.3292G>T	KMT2C	missense_variant	1	0	8	2118.62	0.00672209	0.00103733	0.142857
Malignant	11	1651119	C	T	p.Arg17Cys	c.49C>T	KRTAP5-5	missense_variant	8	1	16	2480.06	0.0235421	0.0388744	0.117647
Benign	11	1651119	C	T	p.Arg17Cys	c.49C>T	KRTAP5-5	missense_variant	8	1	3	2581.33	0.00575034	0.000463021	0.0535714
Malignant	11	20622769	G	C	p.Arg33Thr	c.98G>C	SLC6A5	missense_variant	.	.	18	3330.11	0.00697361	0.00176604	0.132353
Benign	11	20622769	G	C	p.Arg33Thr	c.98G>C	SLC6A5	missense_variant	.	.	1	3034	0.00560316	0	0.0178571
Malignant	17	37872851	T	G	p.Phe577Cys	c.1730T>G	ERBB2	missense_variant	.	.	6	3312.67	0.00568363	0.000430895	0.0441176
Benign	17	37872851	T	G	p.Phe577Cys	c.1730T>G	ERBB2	missense_variant	.	.	13	2568.31	0.00606792	0.000896644	0.232143
Malignant	19	1220449	A	C	p.Asn181Thr	c.542A>C	STK11	missense_variant	1	1	15	4372.73	0.00742554	0.00187403	0.110294
Benign	19	1220449	A	C	p.Asn181Thr	c.542A>C	STK11	missense_variant	1	1	4	2501.75	0.00661254	0.000846142	0.0714286
Malignant	1	158637864	TGAA	T	.	c.1834-15_1834-13delTTC	SPTA1	splice_region_variant&intron_variant	.	.	6	1208.33	0.0116439	0.00431396	0.0441176
Benign	1	158637864	TGAA	T	.	c.1834-15_1834-13delTTC	SPTA1	splice_region_variant&intron_variant	.	.	12	1498.42	0.0130892	0.00665913	0.214286
Malignant	1	237872771	G	T	.	c.10143-9G>T	RYR2	splice_region_variant&intron_variant	.	.	12	1079.92	0.00706869	0.00306973	0.0882353
Benign	1	237872771	G	T	.	c.10143-9G>T	RYR2	splice_region_variant&intron_variant	.	.	6	1137.17	0.00536587	0.00047305	0.107143
Malignant	4	1807162	G	T	p.Arg500Leu	c.1499G>T	FGFR3	missense_variant	.	.	12	1982.42	0.00749032	0.00234564	0.0882353
Benign	4	1807162	G	T	p.Arg500Leu	c.1499G>T	FGFR3	missense_variant	.	.	6	3336.83	0.00792201	0.0020821	0.107143
Malignant	4	55599295	G	T	p.Lys807Asn	c.2421G>T	KIT	missense_variant	1	0	11	1485.27	0.008082	0.00485818	0.0808824
Benign	4	55599295	G	T	p.Lys807Asn	c.2421G>T	KIT	missense_variant	1	0	7	1865.71	0.00714548	0.00137344	0.125
Malignant	4	153245404	G	A	p.Ser596Phe	c.1787C>T	FBXW7_NM_018315_2	missense_variant	1	0	6	1955.17	0.00755302	0.00154314	0.0441176
Benign	4	153245404	G	A	p.Ser596Phe	c.1787C>T	FBXW7_NM_018315_2	missense_variant	1	0	12	2369	0.00744496	0.00226559	0.214286
Malignant	6	117724307	T	G	p.His191Pro	c.572A>C	ROS1	missense_variant	.	.	13	1080.77	0.00676991	0.00102633	0.0955882
Benign	6	117724307	T	G	p.His191Pro	c.572A>C	ROS1	missense_variant	.	.	5	1290.8	0.00940194	0.00176356	0.0892857
Malignant	7	116409735	G	T	p.Val892Leu	c.2674G>T	MET	missense_variant	.	.	16	1351.19	0.00906053	0.00557287	0.117647
Benign	7	116409735	G	T	p.Val892Leu	c.2674G>T	MET	missense_variant	.	.	2	1366	0.00777181	0.0015837	0.0357143
Malignant	7	151842397	C	T	.	c.14032-17G>A	KMT2C	splice_region_variant&intron_variant	.	.	13	1739.31	0.218047	0.0599976	0.0955882
Benign	7	151842397	C	T	.	c.14032-17G>A	KMT2C	splice_region_variant&intron_variant	.	.	5	1759.4	0.23694	0.00558808	0.0892857
Malignant	7	151874161	C	A	p.Glu2793*	c.8377G>T	KMT2C	stop_gained	1	0	12	1658.08	0.00998786	0.00520336	0.0882353
Benign	7	151874161	C	A	p.Glu2793*	c.8377G>T	KMT2C	stop_gained	1	0	6	2024.83	0.00564174	0.000576194	0.107143
Malignant	9	79954400	ATTTTG	A	.	c.6379-22_6379-18delGTTTT	VPS13A	splice_region_variant&intron_variant	.	.	14	1395.79	0.0101815	0.00378574	0.102941
Benign	9	79954400	ATTTTG	A	.	c.6379-22_6379-18delGTTTT	VPS13A	splice_region_variant&intron_variant	.	.	4	1359	0.010794	0.00385441	0.0714286
Malignant	9	139409956	A	C	p.Phe628Val	c.1882T>G	NOTCH1	missense_variant	1	0	7	2046.14	0.00625967	0.00111916	0.0514706
Benign	9	139409956	A	C	p.Phe628Val	c.1882T>G	NOTCH1	missense_variant	1	0	11	2796.36	0.00656822	0.000985148	0.196429
Malignant	10	89720744	G	T	p.Glu472*	c.1414G>T	PTEN	stop_gained	15	0	16	2065.19	0.00637633	0.00110389	0.117647
Benign	10	89720744	G	T	p.Glu472*	c.1414G>T	PTEN	stop_gained	14	0	2	1489	0.00574728	0.00012356	0.0357143
Malignant	2	141072507	G	T	p.Leu4268Ile	c.12802C>A	LRP1B	missense_variant	1	1	14	1848.79	0.00810068	0.00610511	0.102941
Benign	2	141072507	G	T	p.Leu4268Ile	c.12802C>A	LRP1B	missense_variant	1	1	3	2227.67	0.00601715	0.000678945	0.0535714
Malignant	2	141298682	G	C	.	c.7388-15C>G	LRP1B	splice_region_variant&intron_variant	.	.	11	1515.64	0.228369	0.0157427	0.0808824
Benign	2	141298682	G	C	.	c.7388-15C>G	LRP1B	splice_region_variant&intron_variant	.	.	6	1540.67	0.244895	0.00234902	0.107143
Malignant	6	117725516	G	T	p.Ala122Glu	c.365C>A	ROS1	missense_variant	.	.	15	1008.4	0.00687943	0.00236146	0.110294
Benign	6	117725516	G	T	p.Ala122Glu	c.365C>A	ROS1	missense_variant	.	.	2	1160.5	0.00656076	0.000383684	0.0357143
Malignant	7	140434576	AAAAAAAAAAG	A	.	c.2128-16_2128-7delCTTTTTTTTT	BRAF	splice_region_variant&intron_variant	.	.	12	1435.5	0.00763822	0.00196744	0.0882353
Benign	7	140434576	AAAAAAAAAAG	A	.	c.2128-16_2128-7delCTTTTTTTTT	BRAF	splice_region_variant&intron_variant	.	.	5	1419.2	0.00697458	0.00175624	0.0892857
Malignant	7	151856009	T	C	p.Lys3870Arg	c.11609A>G	KMT2C	missense_variant	1	0	12	1922	0.00586044	0.000698447	0.0882353
Benign	7	151856009	T	C	p.Lys3870Arg	c.11609A>G	KMT2C	missense_variant	1	0	5	3042.4	0.00699057	0.00105872	0.0892857
Malignant	9	21971113	A	C	p.Val82Gly	c.245T>G	CDKN2A	missense_variant	1	0	7	3406	0.00628381	0.000975652	0.0514706
Benign	9	21971113	A	C	p.Val82Gly	c.245T>G	CDKN2A	missense_variant	1	0	10	4307.4	0.00633446	0.000951614	0.178571
Malignant	9	79955305	A	ATT	.	c.6880-7_6880-6dupTT	VPS13A	splice_region_variant&intron_variant	.	.	12	1554.67	0.0155804	0.00483318	0.0882353
Benign	9	79955305	A	ATT	.	c.6880-7_6880-6dupTT	VPS13A	splice_region_variant&intron_variant	.	.	5	1332.2	0.0160909	0.00205783	0.0892857
Malignant	10	89711918	G	T	p.Ser352Ile	c.1055G>T	PTEN	missense_variant	1	0	15	2144.8	0.00687969	0.00173501	0.110294
Benign	10	89711918	G	T	p.Ser352Ile	c.1055G>T	PTEN	missense_variant	1	0	2	1305.5	0.00563991	0.000387813	0.0357143
Malignant	11	1017599	G	C	p.Ser1734Arg	c.5202C>G	MUC6	missense_variant	.	.	9	7988.89	0.00884512	0.00362084	0.0661765
Benign	11	1017599	G	C	p.Ser1734Arg	c.5202C>G	MUC6	missense_variant	.	.	8	7954.62	0.00774334	0.00372077	0.142857
Malignant	11	1651161	T	A	p.Cys31Ser	c.91T>A	KRTAP5-5	missense_variant	.	.	14	2893	0.00599231	0.000917648	0.102941
Benign	11	1651161	T	A	p.Cys31Ser	c.91T>A	KRTAP5-5	missense_variant	.	.	3	2900.33	0.00586231	6.22282e-05	0.0535714
Malignant	11	1651182	T	G	p.Cys38Gly	c.112T>G	KRTAP5-5	missense_variant	.	.	14	2444.07	0.00573551	0.000449664	0.102941
Benign	11	1651182	T	G	p.Cys38Gly	c.112T>G	KRTAP5-5	missense_variant	.	.	3	2314	0.00571241	0.00053773	0.0535714
Malignant	11	1651381	T	G	p.Val104Gly	c.311T>G	KRTAP5-5	missense_variant	.	.	15	873.8	0.00718219	0.0017312	0.110294
Benign	11	1651381	T	G	p.Val104Gly	c.311T>G	KRTAP5-5	missense_variant	.	.	2	797.5	0.00571301	0.000393861	0.0357143
Malignant	17	7576914	T	G	p.Asn311Thr	c.932A>C	TP53	missense_variant	.	.	15	3046.07	0.00796098	0.00458263	0.110294
Benign	17	7576914	T	G	p.Asn311Thr	c.932A>C	TP53	missense_variant	.	.	2	1578	0.00504622	3.78678e-05	0.0357143
Malignant	17	7578190	T	G	p.Tyr220Ser	c.659A>C	TP53	missense_variant	24	3	11	3556.64	0.00720008	0.00211643	0.0808824
Benign	17	7578190	T	G	p.Tyr220Ser	c.659A>C	TP53	missense_variant	20	0	6	2165.83	0.00580187	0.000422488	0.107143
Malignant	17	29663625	T	TAAA	.	c.6148-19_6148-17dupAAA	NF1	splice_region_variant&intron_variant	.	.	14	851.429	0.00895814	0.00644181	0.102941
Benign	17	29663625	T	TAAA	.	c.6148-19_6148-17dupAAA	NF1	splice_region_variant&intron_variant	.	.	3	967.667	0.00587206	0.000149567	0.0535714
Malignant	19	11170570	CG	C	p.?	c.4864+16delG	SMARCA4	splice_region_variant&intron_variant	2	0	12	1950.58	0.00624535	0.00179165	0.0882353
Benign	19	11170570	CG	C	p.?	c.4864+16delG	SMARCA4	splice_region_variant&intron_variant	2	0	5	1838.2	0.00605172	0.000548816	0.0892857
Malignant	1	182852291	G	T	p.Val978Leu	c.2932G>T	DHX9	missense_variant	1	0	15	1490.4	0.00704448	0.00250399	0.110294
Benign	1	182852291	G	T	p.Val978Leu	c.2932G>T	DHX9	missense_variant	1	0	1	1644	0.00729927	0	0.0178571
Malignant	3	10183733	T	A	p.Ser68Thr	c.202T>A	VHL	missense_variant	3	0	14	2729.14	0.00729618	0.00286865	0.102941
Benign	3	10183733	T	A	p.Ser68Thr	c.202T>A	VHL	missense_variant	3	0	2	1624.5	0.00563633	0.000257578	0.0357143
Malignant	6	70916830	A	ATT	.	c.3302-12_3302-11dupTT	COL19A1	splice_region_variant&intron_variant	.	.	11	2178.55	0.00544228	0.000259486	0.0808824
Benign	6	70916830	A	ATT	.	c.3302-12_3302-11dupTT	COL19A1	splice_region_variant&intron_variant	.	.	5	2413.6	0.0132718	0.0151787	0.0892857
Malignant	7	11871469	A	G	p.Leu35Pro	c.104T>C	THSD7A	missense_variant	1	0	11	3523.18	0.0283945	0.00672894	0.0808824
Benign	7	11871469	A	G	p.Leu35Pro	c.104T>C	THSD7A	missense_variant	1	0	5	3211.4	0.03544	0.00924641	0.0892857
Malignant	7	140624463	G	C	p.Pro14Arg	c.41C>G	BRAF	missense_variant	.	.	9	2882.11	0.00639867	0.00219722	0.0661765
Benign	7	140624463	G	C	p.Pro14Arg	c.41C>G	BRAF	missense_variant	.	.	7	2306.43	0.00627854	0.000785354	0.125
Malignant	7	151927016	T	C	p.Ser990Gly	c.2968A>G	KMT2C	missense_variant	17	0	12	4577.33	0.0644301	0.00592704	0.0882353
Benign	7	151927016	T	C	p.Ser990Gly	c.2968A>G	KMT2C	missense_variant	17	0	4	4851.25	0.0714204	0.00851891	0.0714286
Malignant	9	79959202	GT	G	.	c.7155+14delT	VPS13A	splice_region_variant&intron_variant	.	.	12	1362.67	0.00598949	0.00100131	0.0882353
Benign	9	79959202	GT	G	.	c.7155+14delT	VPS13A	splice_region_variant&intron_variant	.	.	4	1362.5	0.00618502	0.000734016	0.0714286
Malignant	9	139396904	T	C	p.His1735Arg	c.5204A>G	NOTCH1	missense_variant	.	.	5	2097.4	0.00695727	0.00159773	0.0367647
Benign	9	139396904	T	C	p.His1735Arg	c.5204A>G	NOTCH1	missense_variant	.	.	11	2731.45	0.00921787	0.00243864	0.196429
Malignant	10	89711926	T	G	p.Leu355Val	c.1063T>G	PTEN	missense_variant	1	0	12	2002.92	0.00664307	0.00109776	0.0882353
Benign	10	89711926	T	G	p.Leu355Val	c.1063T>G	PTEN	missense_variant	1	0	4	1465.25	0.00684128	0.000946462	0.0714286
Malignant	11	1651399	G	T	p.Gly110Val	c.329G>T	KRTAP5-5	missense_variant	.	.	15	808.533	0.00871815	0.00300084	0.110294
Benign	11	1651399	G	T	p.Gly110Val	c.329G>T	KRTAP5-5	missense_variant	.	.	1	638	0.00783699	0	0.0178571
Malignant	17	7576896	T	G	p.Gln317Pro	c.950A>C	TP53	missense_variant	1	0	13	2843.62	0.00738283	0.003502	0.0955882
Benign	17	7576896	T	G	p.Gln317Pro	c.950A>C	TP53	missense_variant	1	0	3	3289.33	0.00579129	0.000546027	0.0535714
Malignant	17	29559111	T	A	p.Met1073Lys	c.3218T>A	NF1	missense_variant	1	0	13	750.385	0.00736963	0.0021977	0.0955882
Benign	17	29559111	T	A	p.Met1073Lys	c.3218T>A	NF1	missense_variant	1	0	3	798	0.00746802	0.00149128	0.0535714
Malignant	21	10973787	T	A	.	c.-43-11A>T	TPTE	splice_region_variant&intron_variant	.	.	9	1899.11	0.239819	0.00567034	0.0661765
Benign	21	10973787	T	A	.	c.-43-11A>T	TPTE	splice_region_variant&intron_variant	.	.	7	1823.29	0.186971	0.0610055	0.125
Malignant	1	158597507	G	C	p.Leu1858Val	c.5572C>G	SPTA1	missense_variant	2	0	13	1643.92	0.203274	0.0835854	0.0955882
Benign	1	158597507	G	C	p.Leu1858Val	c.5572C>G	SPTA1	missense_variant	2	0	2	1986.5	0.240321	0.00052186	0.0357143
Malignant	1	182812436	T	G	p.Val40Gly	c.119T>G	DHX9	missense_variant	27	7	11	1451.82	0.00581444	0.000582848	0.0808824
Benign	1	182812436	T	G	p.Val40Gly	c.119T>G	DHX9	missense_variant	27	7	4	1664.5	0.00610254	0.000831897	0.0714286
Malignant	2	178098910	C	A	p.Glu45Asp	c.135G>T	NFE2L2	missense_variant	.	.	14	3008.14	0.00930965	0.00502645	0.102941
Benign	2	178098910	C	A	p.Glu45Asp	c.135G>T	NFE2L2	missense_variant	.	.	1	4907	0.00570613	0	0.0178571
Malignant	2	178098960	C	A	p.Asp29Tyr	c.85G>T	NFE2L2	missense_variant	6	3	9	1933.67	0.00700609	0.00255818	0.0661765
Benign	2	178098960	C	A	p.Asp29Tyr	c.85G>T	NFE2L2	missense_variant	6	3	6	3026.67	0.00617466	0.000920404	0.107143
Malignant	4	1807884	A	C	p.Tyr650Ser	c.1949A>C	FGFR3	missense_variant	.	.	9	3492.78	0.00668046	0.00123947	0.0661765
Benign	4	1807884	A	C	p.Tyr650Ser	c.1949A>C	FGFR3	missense_variant	.	.	6	4209.5	0.00612135	0.000839659	0.107143
Malignant	7	55225385	A	T	p.Asn413Tyr	c.1237A>T	EGFR	missense_variant	.	.	11	2343.45	0.00562645	0.000500137	0.0808824
Benign	7	55225385	A	T	p.Asn413Tyr	c.1237A>T	EGFR	missense_variant	.	.	4	1511.5	0.00635572	0.00147525	0.0714286
Malignant	7	140434573	AC	A	.	c.2128-4delG	BRAF	splice_region_variant&intron_variant	.	.	7	1140.71	0.00684361	0.00114672	0.0514706
Benign	7	140434573	AC	A	.	c.2128-4delG	BRAF	splice_region_variant&intron_variant	.	.	8	1916.88	0.00655798	0.000892656	0.142857
Malignant	7	140476814	C	A	p.Trp531Leu	c.1592G>T	BRAF	missense_variant	.	.	10	1403.5	0.00658898	0.00102024	0.0735294
Benign	7	140476814	C	A	p.Trp531Leu	c.1592G>T	BRAF	missense_variant	.	.	5	1306.6	0.00763176	0.00295581	0.0892857
Malignant	7	151856103	T	G	p.Lys3839Gln	c.11515A>C	KMT2C	missense_variant	.	.	9	2173.89	0.00566123	0.00056914	0.0661765
Benign	7	151856103	T	G	p.Lys3839Gln	c.11515A>C	KMT2C	missense_variant	.	.	6	3190.5	0.00548508	0.000257163	0.107143
Malignant	7	151932991	G	A	p.Arg894Trp	c.2680C>T	KMT2C	missense_variant	4	0	3	2251.33	0.0128454	0.0064492	0.0220588
Benign	7	151932991	G	A	p.Arg894Trp	c.2680C>T	KMT2C	missense_variant	4	0	12	2714.25	0.0100334	0.00386125	0.214286
Malignant	8	113241088	T	G	p.Asn3621His	c.10861A>C	CSMD3	missense_variant	5	0	10	1744.1	0.229345	0.0301681	0.0735294
Benign	8	113241088	T	G	p.Asn3621His	c.10861A>C	CSMD3	missense_variant	5	0	5	1464.8	0.233762	0.0128733	0.0892857
Malignant	9	79852989	C	A	p.Ser556Tyr	c.1667C>A	VPS13A	missense_variant	.	.	3	1269.67	0.00562981	0.000370358	0.0220588
Benign	9	79852989	C	A	p.Ser556Tyr	c.1667C>A	VPS13A	missense_variant	.	.	12	1899.83	0.0068132	0.0014158	0.214286
Malignant	10	43612194	C	T	.	c.2284+15C>T	RET	splice_region_variant&intron_variant	.	.	13	1637.62	0.00698552	0.00149291	0.0955882
Benign	10	43612194	C	T	.	c.2284+15C>T	RET	splice_region_variant&intron_variant	.	.	2	2390.5	0.00683983	8.30683e-05	0.0357143
Malignant	11	1016968	T	G	p.Thr1945Pro	c.5833A>C	MUC6	missense_variant	.	.	9	15252.9	0.0065414	0.00236	0.0661765
Benign	11	1016968	T	G	p.Thr1945Pro	c.5833A>C	MUC6	missense_variant	.	.	6	15143.5	0.00610137	0.000475481	0.107143
Malignant	11	1017623	C	G	p.Met1726Ile	c.5178G>C	MUC6	missense_variant	1	0	11	6236.91	0.00773502	0.0027992	0.0808824
Benign	11	1017623	C	G	p.Met1726Ile	c.5178G>C	MUC6	missense_variant	1	0	4	6738	0.00888563	0.00248867	0.0714286
Malignant	13	48955420	G	T	p.Leu512Phe	c.1536G>T	RB1	missense_variant	.	.	9	1128.33	0.00639946	0.000741804	0.0661765
Benign	13	48955420	G	T	p.Leu512Phe	c.1536G>T	RB1	missense_variant	.	.	6	1177.33	0.00638328	0.00163923	0.107143
Malignant	17	7578439	T	G	p.Lys164Thr	c.491A>C	TP53	missense_variant	2	0	9	4739.22	0.00584711	0.00109331	0.0661765
Benign	17	7578439	T	G	p.Lys164Thr	c.491A>C	TP53	missense_variant	2	0	6	5605.17	0.00553714	0.000317758	0.107143
Malignant	17	37881610	A	C	p.Ile894Leu	c.2680A>C	ERBB2	missense_variant	1	0	8	2014.62	0.00641627	0.000972268	0.0588235
Benign	17	37881610	A	C	p.Ile894Leu	c.2680A>C	ERBB2	missense_variant	1	0	7	2078.86	0.00649952	0.00164734	0.125
Malignant	1	27107056	T	G	p.Phe2223Val	c.6667T>G	ARID1A	missense_variant	.	.	13	2073.85	0.00715425	0.00199792	0.0955882
Benign	1	27107056	T	G	p.Phe2223Val	c.6667T>G	ARID1A	missense_variant	.	.	1	1458	0.00685871	0	0.0178571
Malignant	1	182812584	C	T	.	c.252+15C>T	DHX9	splice_region_variant&intron_variant	.	.	10	1409.5	0.225018	0.0208809	0.0735294
Benign	1	182812584	C	T	.	c.252+15C>T	DHX9	splice_region_variant&intron_variant	.	.	4	1956.25	0.231892	0.0147377	0.0714286
Malignant	1	237823273	C	A	.	c.8209-12C>A	RYR2	splice_region_variant&intron_variant	.	.	7	964	0.00698075	0.00199308	0.0514706
Benign	1	237823273	C	A	.	c.8209-12C>A	RYR2	splice_region_variant&intron_variant	.	.	7	1075	0.00582498	0.000693878	0.125
Malignant	2	50282084	G	T	.	c.3928+9C>A	NRXN1	splice_region_variant&intron_variant	.	.	10	1486.7	0.00622855	0.00101539	0.0735294
Benign	2	50282084	G	T	.	c.3928+9C>A	NRXN1	splice_region_variant&intron_variant	.	.	4	1769.5	0.00540644	0.00038257	0.0714286
Malignant	3	37067180	C	A	p.Thr364Lys	c.1091C>A	MLH1	missense_variant	.	.	11	962.273	0.00647365	0.00127279	0.0808824
Benign	3	37067180	C	A	p.Thr364Lys	c.1091C>A	MLH1	missense_variant	.	.	3	951	0.00874305	0.00175553	0.0535714
Malignant	4	55141065	G	A	p.Glu571Lys	c.1711G>A	PDGFRA	missense_variant	2	0	8	1650.88	0.00692247	0.0014087	0.0588235
Benign	4	55141065	G	A	p.Glu571Lys	c.1711G>A	PDGFRA	missense_variant	2	0	6	2173.5	0.00640348	0.00144528	0.107143
Malignant	6	70856535	AC	A	.	c.1771-15delC	COL19A1	splice_region_variant&intron_variant	.	.	11	885.727	0.00674875	0.00122388	0.0808824
Benign	6	70856535	AC	A	.	c.1771-15delC	COL19A1	splice_region_variant&intron_variant	.	.	3	865.333	0.00616503	0.000153644	0.0535714
Malignant	6	117730798	G	A	p.Ser79Leu	c.236C>T	ROS1	missense_variant	1	0	10	912.9	0.00679522	0.00189073	0.0735294
Benign	6	117730798	G	A	p.Ser79Leu	c.236C>T	ROS1	missense_variant	1	0	4	791.25	0.00745594	0.000894062	0.0714286
Malignant	7	11871499	A	G	p.Leu25Pro	c.74T>C	THSD7A	missense_variant	.	.	9	3611.44	0.0106313	0.00444246	0.0661765
Benign	7	11871499	A	G	p.Leu25Pro	c.74T>C	THSD7A	missense_variant	.	.	5	3037	0.00965983	0.00341448	0.0892857
Malignant	7	32209443	A	C	p.Leu88Val	c.262T>G	PDE1C	missense_variant	.	.	11	2033.73	0.00614105	0.000732921	0.0808824
Benign	7	32209443	A	C	p.Leu88Val	c.262T>G	PDE1C	missense_variant	.	.	3	2392.33	0.00635669	0.0013743	0.0535714
Malignant	7	151860599	T	G	p.Ile3355Leu	c.10063A>C	KMT2C	missense_variant	2	0	10	2431.9	0.00676948	0.00174098	0.0735294
Benign	7	151860599	T	G	p.Ile3355Leu	c.10063A>C	KMT2C	missense_variant	2	0	4	2469.25	0.00662272	0.000671602	0.0714286
Malignant	7	151878407	T	G	p.Thr2180Pro	c.6538A>C	KMT2C	missense_variant	1	0	13	1994.46	0.00584879	0.000458139	0.0955882
Benign	7	151878407	T	G	p.Thr2180Pro	c.6538A>C	KMT2C	missense_variant	1	0	1	2346	0.00554135	0	0.0178571
Malignant	7	151935916	G	T	p.?	c.2533-5C>A	KMT2C	splice_region_variant&intron_variant	1	0	6	2145.5	0.00898752	0.00371341	0.0441176
Benign	7	151935916	G	T	p.?	c.2533-5C>A	KMT2C	splice_region_variant&intron_variant	1	0	8	3561.12	0.0179824	0.00681275	0.142857
Malignant	7	151945073	A	T	p.Tyr816Asn	c.2446T>A	KMT2C	missense_variant	.	.	8	8164.75	0.00608999	0.00104071	0.0588235
Benign	7	151945073	A	T	p.Tyr816Asn	c.2446T>A	KMT2C	missense_variant	.	.	6	10465.8	0.00585366	0.000660163	0.107143
Malignant	7	151962126	C	T	p.Cys394Tyr	c.1181G>A	KMT2C	missense_variant	2	0	10	6006.5	0.0578705	0.0186071	0.0735294
Benign	7	151962126	C	T	p.Cys394Tyr	c.1181G>A	KMT2C	missense_variant	2	0	4	6427.75	0.0538802	0.00202679	0.0714286
Malignant	8	38283724	C	A	p.Val252Leu	c.754G>T	FGFR1	missense_variant	1	1	13	1308.23	0.0061148	0.000550345	0.0955882
Benign	8	38283724	C	A	p.Val252Leu	c.754G>T	FGFR1	missense_variant	1	1	1	1493	0.00535834	0	0.0178571
Malignant	8	51314786	G	T	p.Cys15Phe	c.44G>T	SNTG1	missense_variant	1	0	12	1439.92	0.0069353	0.00161864	0.0882353
Benign	8	51314786	G	T	p.Cys15Phe	c.44G>T	SNTG1	missense_variant	1	0	2	2266.5	0.00714354	0.00168136	0.0357143
Malignant	9	79820294	G	T	p.Glu85*	c.253G>T	VPS13A	stop_gained	2	0	10	1035.3	0.00650404	0.00101843	0.0735294
Benign	9	79820294	G	T	p.Glu85*	c.253G>T	VPS13A	stop_gained	2	0	4	1237	0.00609502	0.00105709	0.0714286
Malignant	9	139395313	G	A	.	c.5639-14C>T	NOTCH1	splice_region_variant&intron_variant	.	.	7	1062.86	0.00647395	0.00121017	0.0514706
Benign	9	139395313	G	A	.	c.5639-14C>T	NOTCH1	splice_region_variant&intron_variant	.	.	7	1393.71	0.0067388	0.00106409	0.125
Malignant	13	49050819	G	T	.	c.2521-18G>T	RB1	splice_region_variant&intron_variant	.	.	11	944.182	0.00628876	0.00090694	0.0808824
Benign	13	49050819	G	T	.	c.2521-18G>T	RB1	splice_region_variant&intron_variant	.	.	3	791.667	0.00645945	0.00115556	0.0535714
Malignant	2	29754938	T	G	p.Ile333Leu	c.997A>C	ALK	missense_variant	1	1	9	2076.33	0.00635558	0.00112681	0.0661765
Benign	2	29754938	T	G	p.Ile333Leu	c.997A>C	ALK	missense_variant	1	1	4	3010.5	0.00540328	0.000261589	0.0714286
Malignant	4	55972974	T	A	p.Gln472His	c.1416A>T	KDR	missense_variant	25	0	11	1153.73	0.17362	0.100254	0.0808824
Benign	4	55972974	T	A	p.Gln472His	c.1416A>T	KDR	missense_variant	25	0	2	1561.5	0.228824	0.0144189	0.0357143
Malignant	7	31904572	T	G	p.Tyr305Ser	c.914A>C	PDE1C	missense_variant	.	.	9	1602.89	0.00619588	0.00100219	0.0661765
Benign	7	31904572	T	G	p.Tyr305Ser	c.914A>C	PDE1C	missense_variant	.	.	4	1887	0.00624039	0.000748906	0.0714286
Malignant	7	151875040	C	A	p.Val2500Leu	c.7498G>T	KMT2C	missense_variant	.	.	4	1389.75	0.00606246	0.000673585	0.0294118
Benign	7	151875040	C	A	p.Val2500Leu	c.7498G>T	KMT2C	missense_variant	.	.	9	2355	0.00633814	0.000958918	0.160714
Malignant	8	113323388	G	T	p.Tyr2568*	c.7704C>A	CSMD3	stop_gained	2	2	2	1278	0.00620583	0.000152556	0.0147059
Benign	8	113323388	G	T	p.Tyr2568*	c.7704C>A	CSMD3	stop_gained	2	2	11	2017.27	0.00661468	0.00108441	0.196429
Malignant	9	21974775	T	G	p.Thr18Pro	c.52A>C	CDKN2A	missense_variant	1	0	4	3766.5	0.0057968	0.0004634	0.0294118
Benign	9	21974775	T	G	p.Thr18Pro	c.52A>C	CDKN2A	missense_variant	1	0	9	4798.56	0.00636971	0.00109937	0.160714
Malignant	9	79843141	G	T	p.Ser519Ile	c.1556G>T	VPS13A	missense_variant	.	.	11	1488.73	0.00691295	0.00160419	0.0808824
Benign	9	79843141	G	T	p.Ser519Ile	c.1556G>T	VPS13A	missense_variant	.	.	2	1872	0.0053393	1.30661e-05	0.0357143
Malignant	9	139418246	T	G	p.Asn109Thr	c.326A>C	NOTCH1	missense_variant	1	0	10	2685.8	0.00601822	0.000738752	0.0735294
Benign	9	139418246	T	G	p.Asn109Thr	c.326A>C	NOTCH1	missense_variant	1	0	3	3419.67	0.00561998	0.000358412	0.0535714
Malignant	11	1017220	T	G	p.Thr1861Pro	c.5581A>C	MUC6	missense_variant	.	.	9	12785.8	0.007838	0.00250172	0.0661765
Benign	11	1017220	T	G	p.Thr1861Pro	c.5581A>C	MUC6	missense_variant	.	.	4	8108.25	0.00767805	0.0010956	0.0714286
Malignant	17	7576889	C	A	p.Lys319Asn	c.957G>T	TP53	missense_variant	3	1	12	3167.92	0.00806408	0.00387714	0.0882353
Benign	17	7576889	C	A	p.Lys319Asn	c.957G>T	TP53	missense_variant	3	1	1	4389	0.0059239	0	0.0178571
Malignant	17	7578207	A	C	p.His214Gln	c.642T>G	TP53	missense_variant	3	0	5	3192.6	0.00729437	0.00180919	0.0367647
Benign	17	7578207	A	C	p.His214Gln	c.642T>G	TP53	missense_variant	5	0	8	3079.12	0.00572546	0.00056389	0.142857
Malignant	19	11170757	A	C	p.Lys1634Thr	c.4901A>C	SMARCA4	missense_variant	.	.	9	2216.78	0.00611515	0.00129361	0.0661765
Benign	19	11170757	A	C	p.Lys1634Thr	c.4901A>C	SMARCA4	missense_variant	.	.	4	2108.25	0.0054672	0.000425089	0.0714286
Malignant	1	120539960	AG	A	.	c.416-6delC	NOTCH2	splice_region_variant&intron_variant	.	.	9	928.667	0.00774711	0.00260667	0.0661765
Benign	1	120539960	AG	A	.	c.416-6delC	NOTCH2	splice_region_variant&intron_variant	.	.	3	867.667	0.0107171	0.00252091	0.0535714
Malignant	1	157805921	A	C	p.Val27Gly	c.80T>G	CD5L	missense_variant	.	.	6	2492.67	0.00769513	0.00182699	0.0441176
Benign	1	157805921	A	C	p.Val27Gly	c.80T>G	CD5L	missense_variant	.	.	6	2958.17	0.00625044	0.00129346	0.107143
Malignant	1	237880662	T	G	p.Phe3496Leu	c.10488T>G	RYR2	missense_variant	.	.	3	2114.33	0.00628125	0.00102328	0.0220588
Benign	1	237880662	T	G	p.Phe3496Leu	c.10488T>G	RYR2	missense_variant	.	.	9	2763.11	0.00716422	0.00113775	0.160714
Malignant	2	140990904	GA	G	.	c.13660-10delT	LRP1B	splice_region_variant&intron_variant	.	.	8	1734	0.00614368	0.00183235	0.0588235
Benign	2	140990904	GA	G	.	c.13660-10delT	LRP1B	splice_region_variant&intron_variant	.	.	4	1708	0.00611697	0.000709891	0.0714286
Malignant	2	178098966	C	A	p.Asp27Tyr	c.79G>T	NFE2L2	missense_variant	4	0	11	2167.27	0.00789764	0.00267701	0.0808824
Benign	2	178098966	C	A	p.Asp27Tyr	c.79G>T	NFE2L2	missense_variant	4	0	1	3891	0.00591108	0	0.0178571
Malignant	6	70831852	C	A	.	c.1341+18C>A	COL19A1	splice_region_variant&intron_variant	.	.	6	742.833	0.00611485	0.000977346	0.0441176
Benign	6	70831852	C	A	.	c.1341+18C>A	COL19A1	splice_region_variant&intron_variant	.	.	6	868.667	0.00749837	0.00131991	0.107143
Malignant	6	70856535	A	AT	.	c.1771-16_1771-15insT	COL19A1	splice_region_variant&intron_variant	.	.	10	871.3	0.00742451	0.00218899	0.0735294
Benign	6	70856535	A	AT	.	c.1771-16_1771-15insT	COL19A1	splice_region_variant&intron_variant	.	.	2	1164	0.00690714	0.00107866	0.0357143
Malignant	7	31864509	T	G	p.Thr520Pro	c.1558A>C	PDE1C	missense_variant	1	0	7	1801.14	0.00794015	0.00325235	0.0514706
Benign	7	31864509	T	G	p.Thr520Pro	c.1558A>C	PDE1C	missense_variant	1	0	5	2474.8	0.00704551	0.000834978	0.0892857
Malignant	7	116371926	T	G	.	c.1392+13T>G	MET	splice_region_variant&intron_variant	.	.	5	989	0.00673078	0.00244491	0.0367647
Benign	7	116371926	T	G	.	c.1392+13T>G	MET	splice_region_variant&intron_variant	.	.	7	1390	0.0100186	0.00560361	0.125
Malignant	7	151874186	C	A	p.Lys2784Asn	c.8352G>T	KMT2C	missense_variant	.	.	9	1224.56	0.00905456	0.00403589	0.0661765
Benign	7	151874186	C	A	p.Lys2784Asn	c.8352G>T	KMT2C	missense_variant	.	.	3	1990.67	0.00553075	0.000330574	0.0535714
Malignant	8	3224746	A	C	p.Phe975Val	c.2923T>G	CSMD1	missense_variant	.	.	2	3446.5	0.005691	0.000512476	0.0147059
Benign	8	3224746	A	C	p.Phe975Val	c.2923T>G	CSMD1	missense_variant	.	.	10	3123.3	0.00732117	0.00116455	0.178571
Malignant	8	38272135	C	T	p.Val695Met	c.2083G>A	FGFR1	missense_variant	.	.	10	1413.2	0.00573813	0.000715497	0.0735294
Benign	8	38272135	C	T	p.Val695Met	c.2083G>A	FGFR1	missense_variant	.	.	2	2272.5	0.00696688	0.00169946	0.0357143
Malignant	9	79820322	C	A	p.Ser94Tyr	c.281C>A	VPS13A	missense_variant	.	.	3	901.667	0.00694701	0.00129056	0.0220588
Benign	9	79820322	C	A	p.Ser94Tyr	c.281C>A	VPS13A	missense_variant	.	.	9	1066.44	0.00652992	0.00143293	0.160714
Malignant	9	79827964	G	C	.	c.615+20G>C	VPS13A	splice_region_variant&intron_variant	.	.	5	1348.6	0.237387	0.00517522	0.0367647
Benign	9	79827964	G	C	.	c.615+20G>C	VPS13A	splice_region_variant&intron_variant	.	.	7	1013.29	0.229123	0.0112325	0.125
Malignant	9	79922856	A	T	.	c.3961-5A>T	VPS13A	splice_region_variant&intron_variant	.	.	10	892.9	0.00740764	0.00195918	0.0735294
Benign	9	79922856	A	T	.	c.3961-5A>T	VPS13A	splice_region_variant&intron_variant	.	.	2	1392.5	0.00810684	0.00286208	0.0357143
Malignant	9	139401430	G	A	.	c.3644-5C>T	NOTCH1	splice_region_variant&intron_variant	.	.	7	2245.29	0.00627668	0.00089868	0.0514706
Benign	9	139401430	G	A	.	c.3644-5C>T	NOTCH1	splice_region_variant&intron_variant	.	.	5	2721.8	0.00645806	0.00152873	0.0892857
Malignant	11	1017465	C	A	p.Arg1779Ile	c.5336G>T	MUC6	missense_variant	.	.	7	12023.1	0.00562897	0.000373412	0.0514706
Benign	11	1017465	C	A	p.Arg1779Ile	c.5336G>T	MUC6	missense_variant	.	.	5	12404.6	0.00634514	0.000927436	0.0892857
Malignant	11	1651512	G	T	p.Gly148Cys	c.442G>T	KRTAP5-5	missense_variant	1	1	5	854.4	0.00544256	0.000244216	0.0367647
Benign	11	1651512	G	T	p.Gly148Cys	c.442G>T	KRTAP5-5	missense_variant	1	1	7	660.143	0.0056551	0.000509409	0.125
Malignant	13	49039164	G	T	p.Glu748*	c.2242G>T	RB1	stop_gained	4	4	11	945.091	0.00615729	0.00222762	0.0808824
Benign	13	49039164	G	T	p.Glu748*	c.2242G>T	RB1	stop_gained	4	4	1	932	0.0107296	0	0.0178571
Malignant	21	10921939	C	T	p.Ala362Thr	c.1084G>A	TPTE	missense_variant	.	.	9	3236.44	0.130667	0.011745	0.0661765
Benign	21	10921939	C	T	p.Ala362Thr	c.1084G>A	TPTE	missense_variant	.	.	3	2504.67	0.11428	0.0184942	0.0535714
Malignant	1	27100181	C	CGCA	p.Gln1334dup	c.3999_4001dupGCA	ARID1A	splice_region_variant&disruptive_inframe_insertion	2	0	7	1919.29	0.00646799	0.00134156	0.0514706
Benign	1	27100181	C	CGCA	p.Gln1334dup	c.3999_4001dupGCA	ARID1A	splice_region_variant&disruptive_inframe_insertion	2	0	4	1276.5	0.0061373	0.000607751	0.0714286
Malignant	1	120612013	G	A	p.Ala3Val	c.8C>T	NOTCH2	missense_variant	21	1	7	6755.43	0.118978	0.0135452	0.0514706
Benign	1	120612013	G	A	p.Ala3Val	c.8C>T	NOTCH2	missense_variant	21	1	4	4020.5	0.121444	0.0127159	0.0714286
Malignant	1	120612014	C	A	p.Ala3Ser	c.7G>T	NOTCH2	missense_variant	13	0	7	6772.71	0.118695	0.0145646	0.0514706
Benign	1	120612014	C	A	p.Ala3Ser	c.7G>T	NOTCH2	missense_variant	13	0	4	4030.5	0.120677	0.0123851	0.0714286
Malignant	2	116572434	T	A	p.Ile606Asn	c.1817T>A	DPP10	missense_variant	.	.	7	1758.71	0.00578214	0.000423427	0.0514706
Benign	2	116572434	T	A	p.Ile606Asn	c.1817T>A	DPP10	missense_variant	.	.	4	1437	0.00682151	0.00135084	0.0714286
Malignant	7	151927028	G	T	p.Pro986Thr	c.2956C>A	KMT2C	missense_variant	1	1	9	4339.67	0.00789617	0.00181544	0.0661765
Benign	7	151927028	G	T	p.Pro986Thr	c.2956C>A	KMT2C	missense_variant	1	1	2	8767	0.00707138	0.00162427	0.0357143
Malignant	9	21974780	A	C	p.Leu16Arg	c.47T>G	CDKN2A	missense_variant	.	.	5	2382.2	0.00617203	0.000500187	0.0367647
Benign	9	21974780	A	C	p.Leu16Arg	c.47T>G	CDKN2A	missense_variant	.	.	6	5303.5	0.00559098	0.000434118	0.107143
Malignant	9	139399494	T	G	p.Asn1550Thr	c.4649A>C	NOTCH1	missense_variant	1	0	4	2580.75	0.00582367	0.000610586	0.0294118
Benign	9	139399494	T	G	p.Asn1550Thr	c.4649A>C	NOTCH1	missense_variant	1	0	7	2709.86	0.00676777	0.00109802	0.125
Malignant	11	1017226	T	G	p.Thr1859Pro	c.5575A>C	MUC6	missense_variant	.	.	9	7935.11	0.00559758	0.000625571	0.0661765
Benign	11	1017226	T	G	p.Thr1859Pro	c.5575A>C	MUC6	missense_variant	.	.	2	5555	0.00552542	8.92339e-05	0.0357143
Malignant	11	1017640	T	G	p.Thr1721Pro	c.5161A>C	MUC6	missense_variant	.	.	9	7417.56	0.00652095	0.00167101	0.0661765
Benign	11	1017640	T	G	p.Thr1721Pro	c.5161A>C	MUC6	missense_variant	.	.	2	7127	0.00540249	0.000222596	0.0357143
Malignant	11	1651527	G	T	p.Gly153Cys	c.457G>T	KRTAP5-5	missense_variant	.	.	9	1181.89	0.00683759	0.00148375	0.0661765
Benign	11	1651527	G	T	p.Gly153Cys	c.457G>T	KRTAP5-5	missense_variant	.	.	2	861	0.00693135	0.000300053	0.0357143
Malignant	11	119156158	C	A	p.Pro608His	c.1823C>A	CBL	missense_variant	.	.	10	1705.4	0.00637971	0.00141342	0.0735294
Benign	11	119156158	C	A	p.Pro608His	c.1823C>A	CBL	missense_variant	.	.	1	1585	0.00504732	0	0.0178571
Malignant	12	43887064	T	TA	.	c.868-9dupT	ADAMTS20	splice_region_variant&intron_variant	.	.	9	936.778	0.00630525	0.00171454	0.0661765
Benign	12	43887064	T	TA	.	c.868-9dupT	ADAMTS20	splice_region_variant&intron_variant	.	.	2	794.5	0.00808607	0.00129259	0.0357143
Malignant	13	48954294	C	T	p.?	c.1422-7C>T	RB1	splice_region_variant&intron_variant	1	0	10	787.3	0.0067973	0.00198427	0.0735294
Benign	13	48954294	C	T	p.?	c.1422-7C>T	RB1	splice_region_variant&intron_variant	1	0	1	570	0.00701754	0	0.0178571
Malignant	17	37879840	T	G	p.Met712Arg	c.2135T>G	ERBB2	missense_variant	.	.	5	2976	0.00656101	0.0010078	0.0367647
Benign	17	37879840	T	G	p.Met712Arg	c.2135T>G	ERBB2	missense_variant	.	.	6	4205.17	0.00589841	0.00124175	0.107143
Malignant	19	11097684	G	A	.	c.859+5G>A	SMARCA4	splice_region_variant&intron_variant	.	.	4	825	0.00724239	0.00163823	0.0294118
Benign	19	11097684	G	A	.	c.859+5G>A	SMARCA4	splice_region_variant&intron_variant	.	.	7	907.714	0.00837456	0.0022341	0.125
Malignant	21	10906910	C	T	p.Asp551Asn	c.1651G>A	TPTE	missense_variant	7	0	10	6815.2	0.149473	0.0105076	0.0735294
Benign	21	10906910	C	T	p.Asp551Asn	c.1651G>A	TPTE	missense_variant	7	0	1	5766	0.138918	0	0.0178571
Malignant	1	237617756	G	T	p.Ser453Ile	c.1358G>T	RYR2	missense_variant	1	0	8	1062.25	0.0105001	0.00693297	0.0588235
Benign	1	237617756	G	T	p.Ser453Ile	c.1358G>T	RYR2	missense_variant	1	0	2	1545	0.00543273	0.000134719	0.0357143
Malignant	1	237656254	G	T	p.Val610Phe	c.1828G>T	RYR2	missense_variant	.	.	9	1421.67	0.00625738	0.000761693	0.0661765
Benign	1	237656254	G	T	p.Val610Phe	c.1828G>T	RYR2	missense_variant	.	.	1	2432	0.00699013	0	0.0178571
Malignant	1	237819102	G	T	.	c.7966-19G>T	RYR2	splice_region_variant&intron_variant	.	.	7	1003.14	0.00618605	0.0012995	0.0514706
Benign	1	237819102	G	T	.	c.7966-19G>T	RYR2	splice_region_variant&intron_variant	.	.	3	2208.67	0.00581632	0.00049547	0.0535714
Malignant	2	80808930	G	A	p.Gly665Arg	c.1993G>A	CTNNA2	missense_variant	.	.	6	1523.33	0.00619025	0.000988828	0.0441176
Benign	2	80808930	G	A	p.Gly665Arg	c.1993G>A	CTNNA2	missense_variant	.	.	4	1911.25	0.00670377	0.00129891	0.0714286
Malignant	2	141259447	GA	G	p.?	c.8663-5delT	LRP1B	splice_region_variant&intron_variant	3	0	6	1309.17	0.0058519	0.000367893	0.0441176
Benign	2	141259447	GA	G	p.?	c.8663-5delT	LRP1B	splice_region_variant&intron_variant	3	0	4	1156.5	0.00660989	0.00090958	0.0714286
Malignant	2	141625834	TAAAA	T	.	c.4170-6_4170-3delTTTT	LRP1B	splice_region_variant&intron_variant	.	.	8	1762.88	0.00652798	0.0015575	0.0588235
Benign	2	141625834	TAAAA	T	.	c.4170-6_4170-3delTTTT	LRP1B	splice_region_variant&intron_variant	.	.	2	773	0.00646848	3.34721e-05	0.0357143
Malignant	2	167330301	T	C	.	c.443+8A>G	SCN7A	splice_region_variant&intron_variant	.	.	7	762.286	0.00772542	0.00275026	0.0514706
Benign	2	167330301	T	C	.	c.443+8A>G	SCN7A	splice_region_variant&intron_variant	.	.	3	773.667	0.00644629	0.000944508	0.0535714
Malignant	3	47205383	T	G	p.Lys11Thr	c.32A>C	SETD2	missense_variant	.	.	5	2484	0.00554315	0.000251791	0.0367647
Benign	3	47205383	T	G	p.Lys11Thr	c.32A>C	SETD2	missense_variant	.	.	5	4139.6	0.0063502	0.000973263	0.0892857
Malignant	3	178938760	C	A	.	c.2016-14C>A	PIK3CA	splice_region_variant&intron_variant	.	.	6	1149.83	0.00744726	0.00490794	0.0441176
Benign	3	178938760	C	A	.	c.2016-14C>A	PIK3CA	splice_region_variant&intron_variant	.	.	4	1401.25	0.00676705	0.00161711	0.0714286
Malignant	4	55972996	A	C	.	c.1413-19T>G	KDR	splice_region_variant&intron_variant	.	.	6	1135	0.00591213	0.000675732	0.0441176
Benign	4	55972996	A	C	.	c.1413-19T>G	KDR	splice_region_variant&intron_variant	.	.	4	1265	0.00590186	0.000618367	0.0714286
Malignant	6	70897967	G	A	.	c.3027+18G>A	COL19A1	splice_region_variant&intron_variant	.	.	9	1521.11	0.241647	0.00749428	0.0661765
Benign	6	70897967	G	A	.	c.3027+18G>A	COL19A1	splice_region_variant&intron_variant	.	.	1	1994	0.248245	0	0.0178571
Malignant	8	113323401	C	A	.	c.7697-6G>T	CSMD3	splice_region_variant&intron_variant	.	.	2	1363	0.00584639	0.000364791	0.0147059
Benign	8	113323401	C	A	.	c.7697-6G>T	CSMD3	splice_region_variant&intron_variant	.	.	8	1741	0.00675519	0.00103882	0.142857
Malignant	8	113516201	C	A	p.Ser1634Ile	c.4901G>T	CSMD3	missense_variant	.	.	4	995.5	0.00665816	0.00206779	0.0294118
Benign	8	113516201	C	A	p.Ser1634Ile	c.4901G>T	CSMD3	missense_variant	.	.	6	1854.5	0.00762879	0.00121583	0.107143
Malignant	9	21974802	T	G	p.Met9Leu	c.25A>C	CDKN2A	missense_variant	.	.	4	6934	0.00570743	0.000529083	0.0294118
Benign	9	21974802	T	G	p.Met9Leu	c.25A>C	CDKN2A	missense_variant	.	.	6	3690.83	0.00609683	0.000241534	0.107143
Malignant	9	79897165	C	A	p.Asp1031Glu	c.3093C>A	VPS13A	missense_variant	.	.	2	1194	0.00605178	0.00059475	0.0147059
Benign	9	79897165	C	A	p.Asp1031Glu	c.3093C>A	VPS13A	missense_variant	.	.	8	2069.62	0.00632114	0.000749713	0.142857
Malignant	9	139396811	T	G	p.Gln1766Pro	c.5297A>C	NOTCH1	missense_variant	1	0	7	2710.29	0.00719389	0.00293334	0.0514706
Benign	9	139396811	T	G	p.Gln1766Pro	c.5297A>C	NOTCH1	missense_variant	1	0	3	1671.33	0.00542781	0.000240755	0.0535714
Malignant	11	20660083	G	C	p.Val650Leu	c.1948G>C	SLC6A5	missense_variant	.	.	3	1591.33	0.0103831	0.00325363	0.0220588
Benign	11	20660083	G	C	p.Val650Leu	c.1948G>C	SLC6A5	missense_variant	.	.	7	1135	0.00687656	0.00188712	0.125
Malignant	17	7578394	T	G	p.His179Pro	c.536A>C	TP53	missense_variant	6	1	7	4577.86	0.00636904	0.00139574	0.0514706
Benign	17	7578394	T	G	p.His179Pro	c.536A>C	TP53	missense_variant	6	1	3	2645.33	0.00625517	0.00103511	0.0535714
Malignant	17	7579362	A	C	p.Phe109Val	c.325T>G	TP53	missense_variant	6	1	3	1897	0.00573524	0.000545569	0.0220588
Benign	17	7579362	A	C	p.Phe109Val	c.325T>G	TP53	missense_variant	6	1	7	3518.43	0.00643323	0.000887729	0.125
Malignant	17	29685577	A	C	p.Ile2684Leu	c.8050A>C	NF1	missense_variant	.	.	5	838	0.00717481	0.00264575	0.0367647
Benign	17	29685577	A	C	p.Ile2684Leu	c.8050A>C	NF1	missense_variant	.	.	5	1101.8	0.00541105	0.000347972	0.0892857
Malignant	1	27092761	C	A	p.Pro928Thr	c.2782C>A	ARID1A	missense_variant	.	.	4	946.25	0.00558668	0.000172646	0.0294118
Benign	1	27092761	C	A	p.Pro928Thr	c.2782C>A	ARID1A	missense_variant	.	.	5	1085.4	0.00594503	0.000724194	0.0892857
Malignant	1	27106463	A	C	p.Lys2025Thr	c.6074A>C	ARID1A	missense_variant	1	0	8	1725.12	0.00619044	0.00083139	0.0588235
Benign	1	27106463	A	C	p.Lys2025Thr	c.6074A>C	ARID1A	missense_variant	1	0	1	1184	0.00591216	0	0.0178571
Malignant	1	158637738	C	T	p.Gly650Ser	c.1948G>A	SPTA1	missense_variant	1	0	8	2586.5	0.00607054	0.000795407	0.0588235
Benign	1	158637738	C	T	p.Gly650Ser	c.1948G>A	SPTA1	missense_variant	1	0	1	1688	0.00829384	0	0.0178571
Malignant	1	237965152	G	T	.	c.14091-4G>T	RYR2	splice_region_variant&intron_variant	.	.	6	1106.5	0.00579712	0.00101427	0.0441176
Benign	1	237965152	G	T	.	c.14091-4G>T	RYR2	splice_region_variant&intron_variant	.	.	3	860.667	0.00580438	8.37181e-05	0.0535714
Malignant	2	79312414	G	A	p.?	c.434-5C>T	REG1B	splice_region_variant&intron_variant	1	0	8	1134.75	0.234464	0.0166084	0.0588235
Benign	2	79312414	G	A	p.?	c.434-5C>T	REG1B	splice_region_variant&intron_variant	1	0	1	508	0.226378	0	0.0178571
Malignant	4	1803661	A	G	p.Asp280Gly	c.839A>G	FGFR3	missense_variant	1	1	7	1479.71	0.00710325	0.0012152	0.0514706
Benign	4	1803661	A	G	p.Asp280Gly	c.839A>G	FGFR3	missense_variant	1	1	2	1491	0.00667442	0.00115337	0.0357143
Malignant	4	1806063	A	C	p.Glu363Ala	c.1088A>C	FGFR3	missense_variant	.	.	3	3013.33	0.00594667	0.000543606	0.0220588
Benign	4	1806063	A	C	p.Glu363Ala	c.1088A>C	FGFR3	missense_variant	.	.	6	1819.33	0.00566579	0.000450373	0.107143
Malignant	7	55229177	A	G	.	c.1499-15A>G	EGFR	splice_region_variant&intron_variant	.	.	7	2441.14	0.00659212	0.00194418	0.0514706
Benign	7	55229177	A	G	.	c.1499-15A>G	EGFR	splice_region_variant&intron_variant	.	.	2	1918.5	0.00729526	0.00150977	0.0357143
Malignant	7	55233037	C	G	p.Pro596Arg	c.1787C>G	EGFR	missense_variant	2	0	7	1278.43	0.00662835	0.00132143	0.0514706
Benign	7	55233037	C	G	p.Pro596Arg	c.1787C>G	EGFR	missense_variant	2	0	2	1786	0.00579328	0.000513023	0.0357143
Malignant	7	116409773	C	A	p.His904Gln	c.2712C>A	MET	missense_variant	.	.	8	1071.12	0.00782321	0.00330735	0.0588235
Benign	7	116409773	C	A	p.His904Gln	c.2712C>A	MET	missense_variant	.	.	1	2403	0.0054099	0	0.0178571
Malignant	7	151932949	C	A	p.Gly908Cys	c.2722G>T	KMT2C	missense_variant	3	0	7	2673.14	0.0868401	0.0266674	0.0514706
Benign	7	151932949	C	A	p.Gly908Cys	c.2722G>T	KMT2C	missense_variant	3	0	2	4053.5	0.0864833	0.00941057	0.0357143
Malignant	7	151932985	G	A	p.Pro896Ser	c.2686C>T	KMT2C	missense_variant	.	.	2	2097	0.0112358	0.00413639	0.0147059
Benign	7	151932985	G	A	p.Pro896Ser	c.2686C>T	KMT2C	missense_variant	.	.	7	2900.29	0.00810217	0.00362357	0.125
Malignant	8	38285931	A	C	p.Asp160Glu	c.480T>G	FGFR1	missense_variant	.	.	5	1216.8	0.00599702	0.000821636	0.0367647
Benign	8	38285931	A	C	p.Asp160Glu	c.480T>G	FGFR1	missense_variant	.	.	4	1612	0.00712741	0.00132208	0.0714286
Malignant	8	113662441	G	T	p.Leu1048Ile	c.3142C>A	CSMD3	missense_variant	1	0	8	1877	0.00811369	0.00269834	0.0588235
Benign	8	113662441	G	T	p.Leu1048Ile	c.3142C>A	CSMD3	missense_variant	1	0	1	1717	0.00582411	0	0.0178571
Malignant	8	113662501	T	A	p.Ile1028Phe	c.3082A>T	CSMD3	missense_variant	.	.	8	1826.25	0.0063701	0.0011857	0.0588235
Benign	8	113662501	T	A	p.Ile1028Phe	c.3082A>T	CSMD3	missense_variant	.	.	1	1032	0.00678295	0	0.0178571
Malignant	9	79821001	G	A	.	c.385+6G>A	VPS13A	splice_region_variant&intron_variant	.	.	7	963.429	0.0186318	0.0138068	0.0514706
Benign	9	79821001	G	A	.	c.385+6G>A	VPS13A	splice_region_variant&intron_variant	.	.	2	1048	0.0188345	0.000718565	0.0357143
Malignant	9	79821003	A	T	.	c.385+8A>T	VPS13A	splice_region_variant&intron_variant	.	.	7	938.571	0.0128485	0.00786493	0.0514706
Benign	9	79821003	A	T	.	c.385+8A>T	VPS13A	splice_region_variant&intron_variant	.	.	2	1022.5	0.00945336	0.000518145	0.0357143
Malignant	9	79910778	G	A	.	c.3812+16G>A	VPS13A	splice_region_variant&intron_variant	.	.	4	878.5	0.00898504	0.00162884	0.0294118
Benign	9	79910778	G	A	.	c.3812+16G>A	VPS13A	splice_region_variant&intron_variant	.	.	5	1384.6	0.00625829	0.000608261	0.0892857
Malignant	9	139417546	G	C	p.Cys166Trp	c.498C>G	NOTCH1	missense_variant	1	0	3	2231	0.00675763	0.00105309	0.0220588
Benign	9	139417546	G	C	p.Cys166Trp	c.498C>G	NOTCH1	missense_variant	1	0	6	3858.83	0.00708326	0.00096233	0.107143
Malignant	10	89720768	G	T	p.Glu480*	c.1438G>T	PTEN	stop_gained	2	0	7	1239.86	0.00672566	0.0019104	0.0514706
Benign	10	89720768	G	T	p.Glu480*	c.1438G>T	PTEN	stop_gained	2	0	2	1532.5	0.00579747	0.000139763	0.0357143
Malignant	13	48916843	G	T	p.Glu125*	c.373G>T	RB1	stop_gained	3	1	7	805.286	0.00605472	0.000800675	0.0514706
Benign	13	48916843	G	T	p.Glu125*	c.373G>T	RB1	stop_gained	3	1	2	620.5	0.00810552	0.000620487	0.0357143
Malignant	17	7579717	G	T	p.Pro27Thr	c.79C>A	TP53	missense_variant	.	.	3	1525.67	0.00793096	0.00214699	0.0220588
Benign	17	7579717	G	T	p.Pro27Thr	c.79C>A	TP53	missense_variant	.	.	6	2343.33	0.00610148	0.000738345	0.107143
Malignant	17	10428864	G	A	p.Arg1481Cys	c.4441C>T	MYH2	missense_variant	.	.	5	2599.6	0.00667284	0.00200056	0.0367647
Benign	17	10428864	G	A	p.Arg1481Cys	c.4441C>T	MYH2	missense_variant	.	.	4	2462	0.00615652	0.00161862	0.0714286
Malignant	17	10438691	C	T	p.?	c.1975-9G>A	MYH2	splice_region_variant&intron_variant	1	0	7	1594.43	0.237389	0.00729673	0.0514706
Benign	17	10438691	C	T	p.?	c.1975-9G>A	MYH2	splice_region_variant&intron_variant	1	0	2	1517.5	0.232918	0.00584003	0.0357143
Malignant	19	11096031	G	T	p.Gly102Val	c.305G>T	SMARCA4	missense_variant	.	.	7	2148.29	0.0062644	0.000790329	0.0514706
Benign	19	11096031	G	T	p.Gly102Val	c.305G>T	SMARCA4	missense_variant	.	.	2	1495	0.00663226	0.000401734	0.0357143
Malignant	1	120466341	T	G	p.Tyr1593Ser	c.4778A>C	NOTCH2	missense_variant	1	0	6	1246.67	0.00681863	0.00197475	0.0441176
Benign	1	120466341	T	G	p.Tyr1593Ser	c.4778A>C	NOTCH2	missense_variant	1	0	2	1296	0.00665374	0.000625607	0.0357143
Malignant	1	237806763	A	G	.	c.7342+16A>G	RYR2	splice_region_variant&intron_variant	.	.	5	1496.2	0.236325	0.00853335	0.0367647
Benign	1	237806763	A	G	.	c.7342+16A>G	RYR2	splice_region_variant&intron_variant	.	.	3	1548.33	0.238504	0.00324986	0.0535714
Malignant	1	237905615	A	T	p.Asp3704Val	c.11111A>T	RYR2	missense_variant	1	0	6	1164.17	0.00663232	0.00256746	0.0441176
Benign	1	237905615	A	T	p.Asp3704Val	c.11111A>T	RYR2	missense_variant	1	0	2	918	0.00591138	0.000186185	0.0357143
Malignant	1	237924240	C	T	.	c.11403-15C>T	RYR2	splice_region_variant&intron_variant	.	.	4	1111.75	0.00647526	0.00118391	0.0294118
Benign	1	237924240	C	T	.	c.11403-15C>T	RYR2	splice_region_variant&intron_variant	.	.	4	940.75	0.00631553	0.000529171	0.0714286
Malignant	2	29498054	T	G	p.Lys651Thr	c.1952A>C	ALK	missense_variant	.	.	7	1318.71	0.00722009	0.00209563	0.0514706
Benign	2	29498054	T	G	p.Lys651Thr	c.1952A>C	ALK	missense_variant	.	.	1	1470	0.00544218	0	0.0178571
Malignant	2	29940458	T	G	p.His258Pro	c.773A>C	ALK	missense_variant	.	.	5	1375	0.0134111	0.00398292	0.0367647
Benign	2	29940458	T	G	p.His258Pro	c.773A>C	ALK	missense_variant	.	.	3	1454.33	0.0216766	0.00541098	0.0535714
Malignant	2	178095740	G	T	p.His531Asn	c.1591C>A	NFE2L2	missense_variant	.	.	7	1469.43	0.00843973	0.00310496	0.0514706
Benign	2	178095740	G	T	p.His531Asn	c.1591C>A	NFE2L2	missense_variant	.	.	1	2244	0.00579323	0	0.0178571
Malignant	3	41266130	G	A	p.Ala43Thr	c.127G>A	CTNNB1	missense_variant	5	0	3	1700	0.00620816	0.00103819	0.0220588
Benign	3	41266130	G	A	p.Ala43Thr	c.127G>A	CTNNB1	missense_variant	5	0	5	2098.2	0.00652159	0.00175968	0.0892857
Malignant	4	1807155	A	C	p.Lys498Gln	c.1492A>C	FGFR3	missense_variant	1	0	3	3456	0.00651064	0.00156572	0.0220588
Benign	4	1807155	A	C	p.Lys498Gln	c.1492A>C	FGFR3	missense_variant	1	0	5	3401	0.00665789	0.000745662	0.0892857
Malignant	6	70812123	A	G	p.?	c.1278+9A>G	COL19A1	splice_region_variant&intron_variant	1	0	7	837.143	0.202953	0.0816248	0.0514706
Benign	6	70812123	A	G	p.?	c.1278+9A>G	COL19A1	splice_region_variant&intron_variant	1	0	1	1091	0.24198	0	0.0178571
Malignant	6	117730819	G	A	.	c.229-14C>T	ROS1	splice_region_variant&intron_variant	.	.	6	736.167	0.23823	0.0120402	0.0441176
Benign	6	117730819	G	A	.	c.229-14C>T	ROS1	splice_region_variant&intron_variant	.	.	2	586	0.23626	0.00191294	0.0357143
Malignant	7	116411963	T	A	p.Leu1001His	c.3002T>A	MET	missense_variant	1	0	6	1883.83	0.00633051	0.000577414	0.0441176
Benign	7	116411963	T	A	p.Leu1001His	c.3002T>A	MET	missense_variant	1	0	2	2440.5	0.00750898	0.00122665	0.0357143
Malignant	7	140494090	G	T	.	c.1140+18C>A	BRAF	splice_region_variant&intron_variant	.	.	5	754.8	0.00587025	0.000447033	0.0367647
Benign	7	140494090	G	T	.	c.1140+18C>A	BRAF	splice_region_variant&intron_variant	.	.	3	1299	0.0059071	9.15095e-05	0.0535714
Malignant	7	151859183	T	G	.	c.11460+19A>C	KMT2C	splice_region_variant&intron_variant	.	.	7	1734.57	0.00835652	0.00504436	0.0514706
Benign	7	151859183	T	G	.	c.11460+19A>C	KMT2C	splice_region_variant&intron_variant	.	.	1	1999	0.00550275	0	0.0178571
Malignant	7	151874835	C	T	p.Gly2568Glu	c.7703G>A	KMT2C	missense_variant	1	1	7	2206.71	0.00543914	0.00028456	0.0514706
Benign	7	151874835	C	T	p.Gly2568Glu	c.7703G>A	KMT2C	missense_variant	1	1	1	3265	0.00551302	0	0.0178571
Malignant	7	151917724	C	A	p.Arg1199Leu	c.3596G>T	KMT2C	missense_variant	1	0	6	1498.5	0.00892193	0.00606676	0.0441176
Benign	7	151917724	C	A	p.Arg1199Leu	c.3596G>T	KMT2C	missense_variant	1	0	2	1831.5	0.00574621	3.89134e-05	0.0357143
Malignant	7	151932982	G	A	p.Arg897*	c.2689C>T	KMT2C	stop_gained	1	0	4	2231.25	0.00662026	0.00127867	0.0294118
Benign	7	151932982	G	A	p.Arg897*	c.2689C>T	KMT2C	stop_gained	1	0	4	3795.5	0.01288	0.00425401	0.0714286
Malignant	7	152055717	T	A	p.Met69Leu	c.205A>T	KMT2C	missense_variant	.	.	7	1395.71	0.00634613	0.00135089	0.0514706
Benign	7	152055717	T	A	p.Met69Leu	c.205A>T	KMT2C	missense_variant	.	.	1	739	0.0067659	0	0.0178571
Malignant	8	3224788	GGAGA	G	.	c.2900-23_2900-20delTCTC	CSMD1	splice_region_variant&intron_variant	.	.	5	2539.8	0.00697658	0.00176809	0.0367647
Benign	8	3224788	GGAGA	G	.	c.2900-23_2900-20delTCTC	CSMD1	splice_region_variant&intron_variant	.	.	3	1895	0.00601022	8.0317e-05	0.0535714
Malignant	8	113353715	C	A	p.Val2215Leu	c.6643G>T	CSMD3	missense_variant	1	1	7	1234.14	0.00594568	0.000708984	0.0514706
Benign	8	113353715	C	A	p.Val2215Leu	c.6643G>T	CSMD3	missense_variant	1	1	1	1368	0.00511696	0	0.0178571
Malignant	8	139380187	G	T	p.Leu14Ile	c.40C>A	FAM135B	missense_variant	1	1	6	1407	0.00606147	0.000711499	0.0441176
Benign	8	139380187	G	T	p.Leu14Ile	c.40C>A	FAM135B	missense_variant	1	1	2	852.5	0.00581072	0.000753831	0.0357143
Malignant	9	79820894	G	T	p.Arg95Ile	c.284G>T	VPS13A	missense_variant	1	0	4	819.75	0.00576148	0.000301516	0.0294118
Benign	9	79820894	G	T	p.Arg95Ile	c.284G>T	VPS13A	missense_variant	1	0	4	1221.25	0.00698493	0.00090807	0.0714286
Malignant	9	79980412	G	T	p.Glu2750*	c.8248G>T	VPS13A	stop_gained	1	0	6	1078.33	0.00628672	0.00131344	0.0441176
Benign	9	79980412	G	T	p.Glu2750*	c.8248G>T	VPS13A	stop_gained	1	0	2	957	0.00528412	0.000140839	0.0357143
Malignant	9	139409989	T	G	p.Thr617Pro	c.1849A>C	NOTCH1	missense_variant	.	.	2	5450.5	0.0059794	0.00061939	0.0147059
Benign	9	139409989	T	G	p.Thr617Pro	c.1849A>C	NOTCH1	missense_variant	.	.	6	3911.83	0.00576137	0.00064273	0.107143
Malignant	10	89685313	C	A	p.Leu243Ile	c.727C>A	PTEN	missense_variant	2	0	7	1697.86	0.00630243	0.000365476	0.0514706
Benign	10	89685313	C	A	p.Leu243Ile	c.727C>A	PTEN	missense_variant	2	0	1	1953	0.00512033	0	0.0178571
Malignant	10	89720738	G	T	p.Asp470Tyr	c.1408G>T	PTEN	missense_variant	.	.	6	1225.17	0.00725455	0.00154957	0.0441176
Benign	10	89720738	G	T	p.Asp470Tyr	c.1408G>T	PTEN	missense_variant	.	.	2	2272	0.0059402	0.000644524	0.0357143
Malignant	10	123279562	C	A	p.Trp290Cys	c.870G>T	FGFR2	missense_variant	.	.	7	1457.43	0.0073051	0.00219619	0.0514706
Benign	10	123279562	C	A	p.Trp290Cys	c.870G>T	FGFR2	missense_variant	.	.	1	770	0.00649351	0	0.0178571
Malignant	11	1016997	G	A	p.Thr1935Ile	c.5804C>T	MUC6	missense_variant	.	.	6	13761.7	0.00645029	0.0018983	0.0441176
Benign	11	1016997	G	A	p.Thr1935Ile	c.5804C>T	MUC6	missense_variant	.	.	2	13354.5	0.00535237	9.68244e-05	0.0357143
Malignant	11	1017012	A	G	p.Val1930Ala	c.5789T>C	MUC6	missense_variant	.	.	3	20255.7	0.00874477	0.00272631	0.0220588
Benign	11	1017012	A	G	p.Val1930Ala	c.5789T>C	MUC6	missense_variant	.	.	5	11983.2	0.00559781	0.000702686	0.0892857
Malignant	11	20623003	G	A	p.Ser111Asn	c.332G>A	SLC6A5	missense_variant	.	.	2	3592.5	0.00728361	0.0013897	0.0147059
Benign	11	20623003	G	A	p.Ser111Asn	c.332G>A	SLC6A5	missense_variant	.	.	6	3092	0.00691365	0.00149359	0.107143
Malignant	11	119148876	G	T	p.Glu366*	c.1096G>T	CBL	stop_gained&splice_region_variant	2	1	6	783.167	0.00697486	0.00198358	0.0441176
Benign	11	119148876	G	T	p.Glu366*	c.1096G>T	CBL	stop_gained&splice_region_variant	2	1	2	740.5	0.00537422	0.000120283	0.0357143
Malignant	13	48881438	G	T	p.Glu54*	c.160G>T	RB1	stop_gained	3	0	7	1132.29	0.00644278	0.00116694	0.0514706
Benign	13	48881438	G	T	p.Glu54*	c.160G>T	RB1	stop_gained	3	0	1	1392	0.00502874	0	0.0178571
Malignant	17	7578208	T	G	p.His214Pro	c.641A>C	TP53	missense_variant	2	0	6	4170.17	0.00664115	0.00211055	0.0441176
Benign	17	7578208	T	G	p.His214Pro	c.641A>C	TP53	missense_variant	1	0	2	2191	0.00662244	9.21857e-05	0.0357143
Malignant	17	7578266	T	G	p.Ile195Leu	c.583A>C	TP53	missense_variant	1	0	7	5432.29	0.00779317	0.0019681	0.0514706
Benign	17	7578266	T	G	p.Ile195Leu	c.583A>C	TP53	missense_variant	1	0	1	2186	0.0073193	0	0.0178571
Malignant	19	11097689	C	T	.	c.859+10C>T	SMARCA4	splice_region_variant&intron_variant	.	.	1	724	0.00552486	0	0.00735294
Benign	19	11097689	C	T	.	c.859+10C>T	SMARCA4	splice_region_variant&intron_variant	.	.	7	797.143	0.0079701	0.00258001	0.125
Malignant	21	10951378	C	T	p.Asp112Asn	c.334G>A	TPTE	missense_variant	.	.	7	4260.86	0.155346	0.0132474	0.0514706
Benign	21	10951378	C	T	p.Asp112Asn	c.334G>A	TPTE	missense_variant	.	.	1	1429	0.240028	0	0.0178571
Malignant	1	237620049	T	C	.	c.1612+14T>C	RYR2	splice_region_variant&intron_variant	.	.	4	1500.5	0.241223	0.00649253	0.0294118
Benign	1	237620049	T	C	.	c.1612+14T>C	RYR2	splice_region_variant&intron_variant	.	.	3	1689.33	0.239252	0.00894336	0.0535714
Malignant	1	237675069	C	A	p.Gln934Lys	c.2800C>A	RYR2	missense_variant	.	.	1	756	0.00793651	0	0.00735294
Benign	1	237675069	C	A	p.Gln934Lys	c.2800C>A	RYR2	missense_variant	.	.	6	1852.67	0.00624133	0.000671839	0.107143
Malignant	2	29451833	T	G	p.Lys911Thr	c.2732A>C	ALK	missense_variant	2	0	6	706.5	0.00807647	0.00421937	0.0441176
Benign	2	29451833	T	G	p.Lys911Thr	c.2732A>C	ALK	missense_variant	2	0	1	661	0.00605144	0	0.0178571
Malignant	2	116283478	C	A	p.Thr141Asn	c.422C>A	DPP10	missense_variant	.	.	2	772	0.00584316	0.000109218	0.0147059
Benign	2	116283478	C	A	p.Thr141Asn	c.422C>A	DPP10	missense_variant	.	.	5	1484.4	0.00570567	0.00055459	0.0892857
Malignant	2	116572376	G	T	p.Glu587*	c.1759G>T	DPP10	stop_gained	1	1	5	976.6	0.00716742	0.00167562	0.0367647
Benign	2	116572376	G	T	p.Glu587*	c.1759G>T	DPP10	stop_gained	1	1	2	1422.5	0.00699915	0.0013574	0.0357143
Malignant	2	116593723	T	C	p.?	c.2002-10T>C	DPP10	splice_region_variant&intron_variant	2	0	4	738.75	0.00545653	0.000398861	0.0294118
Benign	2	116593723	T	C	p.?	c.2002-10T>C	DPP10	splice_region_variant&intron_variant	2	0	3	741.333	0.00531704	0.000286153	0.0535714
Malignant	2	140995843	G	A	p.Pro4480Ser	c.13438C>T	LRP1B	missense_variant	.	.	5	786.4	0.208858	0.0144844	0.0367647
Benign	2	140995843	G	A	p.Pro4480Ser	c.13438C>T	LRP1B	missense_variant	.	.	2	1323	0.206675	0.0106696	0.0357143
Malignant	3	47158170	G	C	p.Ala1510Gly	c.4529C>G	SETD2	missense_variant	.	.	6	1493	0.00643339	0.00165277	0.0441176
Benign	3	47158170	G	C	p.Ala1510Gly	c.4529C>G	SETD2	missense_variant	.	.	1	2138	0.005145	0	0.0178571
Malignant	3	47161912	T	G	p.Lys1405Thr	c.4214A>C	SETD2	missense_variant	1	0	6	1213	0.00752108	0.00285002	0.0441176
Benign	3	47161912	T	G	p.Lys1405Thr	c.4214A>C	SETD2	missense_variant	1	0	1	2098	0.00571973	0	0.0178571
Malignant	4	1806041	G	C	.	c.1082-16G>C	FGFR3	splice_region_variant&intron_variant	.	.	4	1609.25	0.00618198	0.000440082	0.0294118
Benign	4	1806041	G	C	.	c.1082-16G>C	FGFR3	splice_region_variant&intron_variant	.	.	3	1325.67	0.00568032	0.000334621	0.0535714
Malignant	6	70608820	CT	C	.	c.92-13delT	COL19A1	splice_region_variant&intron_variant	.	.	5	588.8	0.00643724	0.000816367	0.0367647
Benign	6	70608820	CT	C	.	c.92-13delT	COL19A1	splice_region_variant&intron_variant	.	.	2	744	0.00665316	0.000736001	0.0357143
Malignant	6	117662324	T	G	p.Ile1685Leu	c.5053A>C	ROS1	missense_variant	.	.	3	1361.33	0.0150768	0.00439539	0.0220588
Benign	6	117662324	T	G	p.Ile1685Leu	c.5053A>C	ROS1	missense_variant	.	.	4	1103.25	0.0231053	0.00614826	0.0714286
Malignant	7	151878562	T	G	p.Gln2128Pro	c.6383A>C	KMT2C	missense_variant	.	.	4	2850	0.00895626	0.00322926	0.0294118
Benign	7	151878562	T	G	p.Gln2128Pro	c.6383A>C	KMT2C	missense_variant	.	.	3	2475.67	0.00718936	0.000201216	0.0535714
Malignant	8	3224779	G	A	.	c.2900-10C>T	CSMD1	splice_region_variant&intron_variant	.	.	6	2092.5	0.240435	0.00477095	0.0441176
Benign	8	3224779	G	A	.	c.2900-10C>T	CSMD1	splice_region_variant&intron_variant	.	.	1	2465	0.237323	0	0.0178571
Malignant	8	113650925	C	A	p.Glu1176*	c.3526G>T	CSMD3	stop_gained&splice_region_variant	1	1	4	1335.5	0.00941392	0.00655613	0.0294118
Benign	8	113650925	C	A	p.Glu1176*	c.3526G>T	CSMD3	stop_gained&splice_region_variant	1	1	3	1844.67	0.00524155	0.00017151	0.0535714
Malignant	9	79820999	AAGAAAACAGT	A	.	c.385+6_385+15delGAAAACAGTA	VPS13A	splice_region_variant&intron_variant	.	.	6	1018	0.228498	0.0127833	0.0441176
Benign	9	79820999	AAGAAAACAGT	A	.	c.385+6_385+15delGAAAACAGTA	VPS13A	splice_region_variant&intron_variant	.	.	1	1503	0.230872	0	0.0178571
Malignant	9	79843134	G	T	p.Glu517*	c.1549G>T	VPS13A	stop_gained	1	0	6	1290.5	0.0061931	0.000603678	0.0441176
Benign	9	79843134	G	T	p.Glu517*	c.1549G>T	VPS13A	stop_gained	1	0	1	1529	0.00523218	0	0.0178571
Malignant	9	79968349	G	T	p.Gly2482Trp	c.7444G>T	VPS13A	missense_variant	.	.	3	912	0.00589121	0.000384597	0.0220588
Benign	9	79968349	G	T	p.Gly2482Trp	c.7444G>T	VPS13A	missense_variant	.	.	4	1474	0.00632812	0.000643937	0.0714286
Malignant	9	139396529	T	G	p.Asn1799Thr	c.5396A>C	NOTCH1	missense_variant	1	0	2	4319	0.00555442	0.000452375	0.0147059
Benign	9	139396529	T	G	p.Asn1799Thr	c.5396A>C	NOTCH1	missense_variant	1	0	5	1949	0.00568175	0.000693864	0.0892857
Malignant	9	139405230	T	G	p.Glu872Ala	c.2615A>C	NOTCH1	missense_variant	.	.	6	3401.17	0.00676324	0.00123123	0.0441176
Benign	9	139405230	T	G	p.Glu872Ala	c.2615A>C	NOTCH1	missense_variant	.	.	1	1826	0.00547645	0	0.0178571
Malignant	9	139417524	T	G	p.Thr174Pro	c.520A>C	NOTCH1	missense_variant	.	.	4	4865.25	0.00644948	0.000887654	0.0294118
Benign	9	139417524	T	G	p.Thr174Pro	c.520A>C	NOTCH1	missense_variant	.	.	3	3904.33	0.00556858	0.000718899	0.0535714
Malignant	10	89720699	G	T	p.Glu457*	c.1369G>T	PTEN	stop_gained	2	1	6	1043	0.00666163	0.00148126	0.0441176
Benign	10	89720699	G	T	p.Glu457*	c.1369G>T	PTEN	stop_gained	3	1	1	3276	0.00549451	0	0.0178571
Malignant	13	48881473	G	T	p.Lys65Asn	c.195G>T	RB1	missense_variant	1	0	6	917	0.00651366	0.00109545	0.0441176
Benign	13	48881473	G	T	p.Lys65Asn	c.195G>T	RB1	missense_variant	1	0	1	1078	0.00649351	0	0.0178571
Malignant	13	48939061	C	A	p.Pro298His	c.893C>A	RB1	missense_variant	.	.	5	672.8	0.00620527	0.000634701	0.0367647
Benign	13	48939061	C	A	p.Pro298His	c.893C>A	RB1	missense_variant	.	.	2	639.5	0.00547709	2.74979e-05	0.0357143
Malignant	13	48954220	G	T	p.Ser474Ile	c.1421G>T	RB1	missense_variant&splice_region_variant	1	0	6	581.333	0.00919601	0.00296927	0.0441176
Benign	13	48954220	G	T	p.Ser474Ile	c.1421G>T	RB1	missense_variant&splice_region_variant	1	0	1	545	0.00917431	0	0.0178571
Malignant	17	7577108	C	T	p.Cys277Tyr	c.830G>A	TP53	missense_variant	18	0	5	1517.6	0.00623195	0.000560238	0.0367647
Benign	17	7577108	C	T	p.Cys277Tyr	c.830G>A	TP53	missense_variant	18	0	2	1311	0.00633843	0.000679117	0.0357143
Malignant	1	157804349	T	G	p.Lys189Thr	c.566A>C	CD5L	missense_variant	1	0	4	2681.5	0.00604823	0.000855456	0.0294118
Benign	1	157804349	T	G	p.Lys189Thr	c.566A>C	CD5L	missense_variant	1	0	2	2690	0.00544134	0.000237789	0.0357143
Malignant	1	158584091	A	G	p.Ile2265Thr	c.6794T>C	SPTA1	missense_variant	5	0	3	950.667	0.241027	0.00646559	0.0220588
Benign	1	158584091	A	G	p.Ile2265Thr	c.6794T>C	SPTA1	missense_variant	5	0	3	868	0.232212	0.0135757	0.0535714
Malignant	1	158637743	A	G	p.Ile648Thr	c.1943T>C	SPTA1	missense_variant	.	.	2	1977	0.00644022	0.000622511	0.0147059
Benign	1	158637743	A	G	p.Ile648Thr	c.1943T>C	SPTA1	missense_variant	.	.	4	1947.5	0.0081869	0.00353338	0.0714286
Malignant	1	182812469	C	A	p.Ser51Tyr	c.152C>A	DHX9	missense_variant	1	0	5	975	0.0071968	0.00306479	0.0367647
Benign	1	182812469	C	A	p.Ser51Tyr	c.152C>A	DHX9	missense_variant	1	0	1	1972	0.00709939	0	0.0178571
Malignant	1	237936941	A	G	p.Tyr3923Cys	c.11768A>G	RYR2	missense_variant	1	0	3	1322.33	0.00657607	0.000928	0.0220588
Benign	1	237936941	A	G	p.Tyr3923Cys	c.11768A>G	RYR2	missense_variant	1	0	3	698.333	0.00714586	0.00165155	0.0535714
Malignant	2	51254622	T	C	.	c.772+18A>G	NRXN1	splice_region_variant&intron_variant	.	.	2	2254.5	0.00557809	0.000336154	0.0147059
Benign	2	51254622	T	C	.	c.772+18A>G	NRXN1	splice_region_variant&intron_variant	.	.	4	2169.25	0.0062283	0.000571396	0.0714286
Malignant	2	141457844	C	A	p.Trp2258Cys	c.6774G>T	LRP1B	missense_variant	1	0	5	817.6	0.00765402	0.00306276	0.0367647
Benign	2	141457844	C	A	p.Trp2258Cys	c.6774G>T	LRP1B	missense_variant	1	0	1	2020	0.00544554	0	0.0178571
Malignant	2	167333996	G	T	p.Pro71Thr	c.211C>A	SCN7A	missense_variant	1	1	5	1083.4	0.0069856	0.00225458	0.0367647
Benign	2	167333996	G	T	p.Pro71Thr	c.211C>A	SCN7A	missense_variant	1	1	1	1956	0.00613497	0	0.0178571
Malignant	3	10183823	T	G	p.Tyr98Asp	c.292T>G	VHL	missense_variant	1	0	2	2312	0.00517989	2.52524e-05	0.0147059
Benign	3	10183823	T	G	p.Tyr98Asp	c.292T>G	VHL	missense_variant	1	0	4	2730.5	0.00567319	9.98044e-05	0.0714286
Malignant	3	47058660	T	G	p.Thr2540Pro	c.7618A>C	SETD2	missense_variant	1	0	5	1210.2	0.00833124	0.00340621	0.0367647
Benign	3	47058660	T	G	p.Thr2540Pro	c.7618A>C	SETD2	missense_variant	1	0	1	1260	0.00714286	0	0.0178571
Malignant	4	1801062	C	G	p.Pro64Arg	c.191C>G	FGFR3	missense_variant	.	.	5	1094.6	0.00573483	0.000563375	0.0367647
Benign	4	1801062	C	G	p.Pro64Arg	c.191C>G	FGFR3	missense_variant	.	.	1	4605	0.00542888	0	0.0178571
Malignant	4	1807370	A	C	p.Asn542Thr	c.1625A>C	FGFR3	missense_variant	.	.	1	2169	0.010604	0	0.00735294
Benign	4	1807370	A	C	p.Asn542Thr	c.1625A>C	FGFR3	missense_variant	.	.	5	2632.8	0.00569038	0.00057972	0.0892857
Malignant	5	19473655	G	A	p.Leu685Phe	c.2053C>T	CDH18	missense_variant	.	.	2	1679.5	0.00537332	0.000279944	0.0147059
Benign	5	19473655	G	A	p.Leu685Phe	c.2053C>T	CDH18	missense_variant	.	.	4	2010.25	0.00597322	0.000595824	0.0714286
Malignant	5	19483536	T	G	p.Ile586Leu	c.1756A>C	CDH18	missense_variant	.	.	3	1248.33	0.00791961	0.00187222	0.0220588
Benign	5	19483536	T	G	p.Ile586Leu	c.1756A>C	CDH18	missense_variant	.	.	3	2313.67	0.00604587	0.000896568	0.0535714
Malignant	6	70900009	C	T	.	c.3028-10C>T	COL19A1	splice_region_variant&intron_variant	.	.	3	616.333	0.00597563	0.000484811	0.0220588
Benign	6	70900009	C	T	.	c.3028-10C>T	COL19A1	splice_region_variant&intron_variant	.	.	3	841	0.00594364	0.000242392	0.0535714
Malignant	7	55210001	G	T	p.Lys37Asn	c.111G>T	EGFR	missense_variant	1	0	5	1434.2	0.00779937	0.00265721	0.0367647
Benign	7	55210001	G	T	p.Lys37Asn	c.111G>T	EGFR	missense_variant	1	0	1	2477	0.00524828	0	0.0178571
Malignant	7	55220370	T	C	.	c.747+13T>C	EGFR	splice_region_variant&intron_variant	.	.	5	1713.8	0.00846721	0.00270375	0.0367647
Benign	7	55220370	T	C	.	c.747+13T>C	EGFR	splice_region_variant&intron_variant	.	.	1	561	0.0142602	0	0.0178571
Malignant	7	55269052	T	G	.	c.3114+4T>G	EGFR	splice_region_variant&intron_variant	.	.	5	1449.4	0.0214196	0.00726648	0.0367647
Benign	7	55269052	T	G	.	c.3114+4T>G	EGFR	splice_region_variant&intron_variant	.	.	1	2555	0.0305284	0	0.0178571
Malignant	7	134225785	G	T	.	c.909-14G>T	AKR1B10	splice_region_variant&intron_variant	.	.	5	918.8	0.00572504	0.000495025	0.0367647
Benign	7	134225785	G	T	.	c.909-14G>T	AKR1B10	splice_region_variant&intron_variant	.	.	1	1254	0.00637959	0	0.0178571
Malignant	7	151874212	C	A	p.Glu2776*	c.8326G>T	KMT2C	stop_gained	1	0	5	1143	0.00806996	0.00273648	0.0367647
Benign	7	151874212	C	A	p.Glu2776*	c.8326G>T	KMT2C	stop_gained	1	0	1	2921	0.00581992	0	0.0178571
Malignant	7	151875052	C	A	p.Glu2496*	c.7486G>T	KMT2C	stop_gained	2	0	2	1036	0.00789982	0.00235659	0.0147059
Benign	7	151875052	C	A	p.Glu2496*	c.7486G>T	KMT2C	stop_gained	2	0	4	2873.75	0.00586367	0.000525428	0.0714286
Malignant	9	79820283	C	A	p.Ala81Asp	c.242C>A	VPS13A	missense_variant	1	0	3	736.333	0.00547927	0.000559517	0.0220588
Benign	9	79820283	C	A	p.Ala81Asp	c.242C>A	VPS13A	missense_variant	1	0	3	1225	0.00584115	0.000989368	0.0535714
Malignant	9	79959117	G	T	p.Val2359Phe	c.7075G>T	VPS13A	missense_variant	1	1	5	1080.6	0.00755712	0.00375728	0.0367647
Benign	9	79959117	G	T	p.Val2359Phe	c.7075G>T	VPS13A	missense_variant	1	1	1	1572	0.00572519	0	0.0178571
Malignant	9	133747540	T	G	p.Phe302Val	c.904T>G	ABL1	missense_variant	.	.	4	1140.25	0.00798563	0.00257504	0.0294118
Benign	9	133747540	T	G	p.Phe302Val	c.904T>G	ABL1	missense_variant	.	.	2	1625.5	0.00522516	0.000206341	0.0357143
Malignant	9	139391281	A	C	p.Leu2304Val	c.6910T>G	NOTCH1	missense_variant	1	0	4	3439.75	0.00585347	0.000853047	0.0294118
Benign	9	139391281	A	C	p.Leu2304Val	c.6910T>G	NOTCH1	missense_variant	1	0	2	5155.5	0.00512506	3.23024e-05	0.0357143
Malignant	9	139391833	G	A	p.Arg2120Cys	c.6358C>T	NOTCH1	missense_variant	.	.	4	1973.75	0.00541839	0.000337063	0.0294118
Benign	9	139391833	G	A	p.Arg2120Cys	c.6358C>T	NOTCH1	missense_variant	.	.	2	1370	0.00727171	0.000627188	0.0357143
Malignant	9	139414031	G	A	.	c.743-14C>T	NOTCH1	splice_region_variant&intron_variant	.	.	4	2300	0.00746422	0.00340921	0.0294118
Benign	9	139414031	G	A	.	c.743-14C>T	NOTCH1	splice_region_variant&intron_variant	.	.	2	2395	0.00540191	0.000124863	0.0357143
Malignant	11	1016944	G	A	p.His1953Tyr	c.5857C>T	MUC6	missense_variant	1	0	4	15167.5	0.0457414	0.00802085	0.0294118
Benign	11	1016944	G	A	p.His1953Tyr	c.5857C>T	MUC6	missense_variant	1	0	2	9905	0.0546433	0.00559574	0.0357143
Malignant	11	1017528	T	A	p.His1758Leu	c.5273A>T	MUC6	missense_variant	.	.	4	13927	0.00638515	0.00158495	0.0294118
Benign	11	1017528	T	A	p.His1758Leu	c.5273A>T	MUC6	missense_variant	.	.	2	11998.5	0.00558461	1.22453e-05	0.0357143
Malignant	11	1017663	T	G	p.Asn1713Thr	c.5138A>C	MUC6	missense_variant	.	.	5	6249.6	0.00690206	0.00277968	0.0367647
Benign	11	1017663	T	G	p.Asn1713Thr	c.5138A>C	MUC6	missense_variant	.	.	1	2688	0.00558036	0	0.0178571
Malignant	13	48953759	C	A	p.Tyr454*	c.1362C>A	RB1	stop_gained	1	1	5	924	0.00889435	0.00306714	0.0367647
Benign	13	48953759	C	A	p.Tyr454*	c.1362C>A	RB1	stop_gained	1	1	1	638	0.00626959	0	0.0178571
Malignant	17	7578393	A	C	p.His179Gln	c.537T>G	TP53	missense_variant	13	0	2	2001	0.00652852	9.88706e-05	0.0147059
Benign	17	7578393	A	C	p.His179Gln	c.537T>G	TP53	missense_variant	13	0	4	2531.5	0.00580198	0.000611711	0.0714286
Malignant	17	29556886	G	T	p.Glu962*	c.2884G>T	NF1	stop_gained	1	1	5	929.8	0.00829026	0.00453212	0.0367647
Benign	17	29556886	G	T	p.Glu962*	c.2884G>T	NF1	stop_gained	1	1	1	1128	0.0070922	0	0.0178571
Malignant	17	29559132	T	A	p.Leu1080Gln	c.3239T>A	NF1	missense_variant	1	0	3	836.333	0.00571289	0.000523385	0.0220588
Benign	17	29559132	T	A	p.Leu1080Gln	c.3239T>A	NF1	missense_variant	1	0	3	600	0.00616397	0.000883611	0.0535714
Malignant	17	29661844	AT	A	.	c.5813-5delT	NF1	splice_region_variant&intron_variant	.	.	3	880.333	0.00684	0.00144777	0.0220588
Benign	17	29661844	AT	A	.	c.5813-5delT	NF1	splice_region_variant&intron_variant	.	.	3	744.333	0.00696442	0.0013235	0.0535714
Malignant	17	29676104	C	CTTGT	.	c.7190-11_7190-8dupGTTT	NF1	splice_region_variant&intron_variant	.	.	3	812.667	0.00573171	0.000372276	0.0220588
Benign	17	29676104	C	CTTGT	.	c.7190-11_7190-8dupGTTT	NF1	splice_region_variant&intron_variant	.	.	3	812.333	0.00689421	0.00121557	0.0535714
Malignant	19	10600392	T	A	p.Glu488Val	c.1463A>T	KEAP1	missense_variant	1	1	4	2853	0.00633714	0.00110253	0.0294118
Benign	19	10600392	T	A	p.Glu488Val	c.1463A>T	KEAP1	missense_variant	1	1	2	1251.5	0.00532876	0.000237107	0.0357143
Malignant	1	181680116	T	A	p.Val361Glu	c.1082T>A	CACNA1E	missense_variant	1	0	4	1221.75	0.00710755	0.00170448	0.0294118
Benign	1	181680116	T	A	p.Val361Glu	c.1082T>A	CACNA1E	missense_variant	1	0	1	2036	0.00589391	0	0.0178571
Malignant	1	181701798	A	G	p.Asp859Gly	c.2576A>G	CACNA1E	missense_variant	2	0	3	2953.33	0.00562673	0.000205105	0.0220588
Benign	1	181701798	A	G	p.Asp859Gly	c.2576A>G	CACNA1E	missense_variant	2	0	2	2324.5	0.00610701	0.000917258	0.0357143
Malignant	1	237655210	G	T	p.Gly605*	c.1813G>T	RYR2	stop_gained	1	1	3	662	0.00601632	0.000246738	0.0220588
Benign	1	237655210	G	T	p.Gly605*	c.1813G>T	RYR2	stop_gained	1	1	2	685	0.00510751	1.41302e-05	0.0357143
Malignant	1	237664001	C	A	.	c.2204-10C>A	RYR2	splice_region_variant&intron_variant	.	.	3	1145	0.00879466	0.00222083	0.0220588
Benign	1	237664001	C	A	.	c.2204-10C>A	RYR2	splice_region_variant&intron_variant	.	.	2	1619.5	0.00680551	0.00130429	0.0357143
Malignant	1	237801727	T	C	p.Ile2288Thr	c.6863T>C	RYR2	missense_variant	.	.	4	1242	0.00581515	0.000760805	0.0294118
Benign	1	237801727	T	C	p.Ile2288Thr	c.6863T>C	RYR2	missense_variant	.	.	1	1991	0.00602712	0	0.0178571
Malignant	1	237804288	G	A	p.Ala2403Thr	c.7207G>A	RYR2	missense_variant	.	.	2	1137	0.00675112	0.00055704	0.0147059
Benign	1	237804288	G	A	p.Ala2403Thr	c.7207G>A	RYR2	missense_variant	.	.	3	1564	0.00935379	0.00153273	0.0535714
Malignant	1	237824125	C	A	p.Arg2772Ser	c.8314C>A	RYR2	missense_variant	.	.	4	1390.25	0.00655353	0.000753252	0.0294118
Benign	1	237824125	C	A	p.Arg2772Ser	c.8314C>A	RYR2	missense_variant	.	.	1	755	0.00529801	0	0.0178571
Malignant	1	237843775	A	T	p.Asp2972Val	c.8915A>T	RYR2	missense_variant	2	0	4	870.75	0.0107724	0.00682569	0.0294118
Benign	1	237843775	A	T	p.Asp2972Val	c.8915A>T	RYR2	missense_variant	2	0	1	652	0.00766871	0	0.0178571
Malignant	2	29446236	C	A	p.Val1111Leu	c.3331G>T	ALK	missense_variant	.	.	2	2124	0.00788285	0.00183446	0.0147059
Benign	2	29446236	C	A	p.Val1111Leu	c.3331G>T	ALK	missense_variant	.	.	3	2475	0.00575597	0.000802034	0.0535714
Malignant	2	29519930	G	A	.	c.1648-7C>T	ALK	splice_region_variant&intron_variant	.	.	3	1230.67	0.00644735	0.00100294	0.0220588
Benign	2	29519930	G	A	.	c.1648-7C>T	ALK	splice_region_variant&intron_variant	.	.	2	1479.5	0.0064396	0.000553403	0.0357143
Malignant	2	50780060	T	G	p.Asn515Thr	c.1544A>C	NRXN1	missense_variant	.	.	1	1924	0.00519751	0	0.00735294
Benign	2	50780060	T	G	p.Asn515Thr	c.1544A>C	NRXN1	missense_variant	.	.	4	3619.75	0.00524251	0.0001779	0.0714286
Malignant	2	141816435	G	T	.	c.1408+17C>A	LRP1B	splice_region_variant&intron_variant	.	.	4	765.75	0.0095268	0.00413327	0.0294118
Benign	2	141816435	G	T	.	c.1408+17C>A	LRP1B	splice_region_variant&intron_variant	.	.	1	2229	0.00628084	0	0.0178571
Malignant	2	167304170	C	T	p.Asp447Asn	c.1339G>A	SCN7A	missense_variant	.	.	3	896	0.00723478	0.00168376	0.0220588
Benign	2	167304170	C	T	p.Asp447Asn	c.1339G>A	SCN7A	missense_variant	.	.	2	979.5	0.00633751	0.000523555	0.0357143
Malignant	3	47098523	C	G	p.Asp2251His	c.6751G>C	SETD2	missense_variant	1	0	4	1609.75	0.00671003	0.00130107	0.0294118
Benign	3	47098523	C	G	p.Asp2251His	c.6751G>C	SETD2	missense_variant	1	0	1	3487	0.00516203	0	0.0178571
Malignant	3	47161964	C	A	p.Asp1388Tyr	c.4162G>T	SETD2	missense_variant	1	0	4	879.25	0.00913344	0.00382941	0.0294118
Benign	3	47161964	C	A	p.Asp1388Tyr	c.4162G>T	SETD2	missense_variant	1	0	1	520	0.00576923	0	0.0178571
Malignant	3	47161982	C	A	p.Ala1382Ser	c.4144G>T	SETD2	missense_variant	.	.	3	939.667	0.00959689	0.00318189	0.0220588
Benign	3	47161982	C	A	p.Ala1382Ser	c.4144G>T	SETD2	missense_variant	.	.	2	590.5	0.00591799	7.00354e-05	0.0357143
Malignant	3	178922274	C	A	.	c.1060-17C>A	PIK3CA	splice_region_variant&intron_variant	.	.	4	616.25	0.0057529	0.000954918	0.0294118
Benign	3	178922274	C	A	.	c.1060-17C>A	PIK3CA	splice_region_variant&intron_variant	.	.	1	1179	0.00763359	0	0.0178571
Malignant	3	181430506	A	C	p.Met120Leu	c.358A>C	SOX2	missense_variant	.	.	2	2530	0.00510324	7.81108e-05	0.0147059
Benign	3	181430506	A	C	p.Met120Leu	c.358A>C	SOX2	missense_variant	.	.	3	2309.67	0.00543659	0.000386543	0.0535714
Malignant	5	112175615	C	A	p.Pro1442Thr	c.4324C>A	APC	missense_variant	.	.	3	2524	0.00536052	0.000250207	0.0220588
Benign	5	112175615	C	A	p.Pro1442Thr	c.4324C>A	APC	missense_variant	.	.	2	2589.5	0.00756495	0.000532218	0.0357143
Malignant	5	170837513	C	T	.	c.847-18C>T	NPM1	splice_region_variant&intron_variant	.	.	3	1150.67	0.0276424	0.018624	0.0220588
Benign	5	170837513	C	T	.	c.847-18C>T	NPM1	splice_region_variant&intron_variant	.	.	2	1733	0.00550425	0.000235546	0.0357143
Malignant	6	70778378	G	C	.	c.1224+10G>C	COL19A1	splice_region_variant&intron_variant	.	.	4	965.5	0.159422	0.0959311	0.0294118
Benign	6	70778378	G	C	.	c.1224+10G>C	COL19A1	splice_region_variant&intron_variant	.	.	1	622	0.234727	0	0.0178571
Malignant	6	70778379	C	T	.	c.1224+11C>T	COL19A1	splice_region_variant&intron_variant	.	.	4	959	0.158462	0.0951724	0.0294118
Benign	6	70778379	C	T	.	c.1224+11C>T	COL19A1	splice_region_variant&intron_variant	.	.	1	617	0.236629	0	0.0178571
Malignant	6	70852643	C	A	.	c.1573-16C>A	COL19A1	splice_region_variant&intron_variant	.	.	4	819.75	0.00577625	0.000743908	0.0294118
Benign	6	70852643	C	A	.	c.1573-16C>A	COL19A1	splice_region_variant&intron_variant	.	.	1	1355	0.00664207	0	0.0178571
Malignant	6	70894620	C	A	p.Pro934Gln	c.2801C>A	COL19A1	missense_variant	1	0	4	730.75	0.00738633	0.00227714	0.0294118
Benign	6	70894620	C	A	p.Pro934Gln	c.2801C>A	COL19A1	missense_variant	1	0	1	1040	0.00673077	0	0.0178571
Malignant	6	70900020	C	A	p.Ala1010Asp	c.3029C>A	COL19A1	missense_variant	.	.	3	744	0.00906268	0.00207196	0.0220588
Benign	6	70900020	C	A	p.Ala1010Asp	c.3029C>A	COL19A1	missense_variant	.	.	2	875	0.00575545	0.000486747	0.0357143
Malignant	6	117609887	C	A	p.Gly2271Val	c.6812G>T	ROS1	missense_variant	.	.	4	1731	0.00855881	0.00367496	0.0294118
Benign	6	117609887	C	A	p.Gly2271Val	c.6812G>T	ROS1	missense_variant	.	.	1	2288	0.00524476	0	0.0178571
Malignant	6	117686215	C	A	.	c.3118+8G>T	ROS1	splice_region_variant&intron_variant	.	.	1	712	0.00561798	0	0.00735294
Benign	6	117686215	C	A	.	c.3118+8G>T	ROS1	splice_region_variant&intron_variant	.	.	4	941.75	0.00730829	0.00268557	0.0714286
Malignant	6	133802750	A	C	.	c.1125+13A>C	EYA4	splice_region_variant&intron_variant	.	.	1	1814	0.0126792	0	0.00735294
Benign	6	133802750	A	C	.	c.1125+13A>C	EYA4	splice_region_variant&intron_variant	.	.	4	1820.75	0.00958518	0.00471524	0.0714286
Malignant	7	11871502	T	A	p.Gln24Leu	c.71A>T	THSD7A	missense_variant	.	.	3	3878.67	0.00568358	0.000615902	0.0220588
Benign	7	11871502	T	A	p.Gln24Leu	c.71A>T	THSD7A	missense_variant	.	.	2	3742.5	0.00535308	0.000124	0.0357143
Malignant	7	55214443	G	A	p.?	c.559+10G>A	EGFR	splice_region_variant&intron_variant	5	0	4	2441	0.185588	0.0931527	0.0294118
Benign	7	55214443	G	A	p.?	c.559+10G>A	EGFR	splice_region_variant&intron_variant	5	0	1	1836	0.242919	0	0.0178571
Malignant	7	55248966	G	A	.	c.2284-20G>A	EGFR	splice_region_variant&intron_variant	.	.	4	1073.5	0.00778168	0.00137913	0.0294118
Benign	7	55248966	G	A	.	c.2284-20G>A	EGFR	splice_region_variant&intron_variant	.	.	1	1193	0.00586756	0	0.0178571
Malignant	7	116409691	C	T	.	c.2638-8C>T	MET	splice_region_variant&intron_variant	.	.	3	962.667	0.00593372	0.000368698	0.0220588
Benign	7	116409691	C	T	.	c.2638-8C>T	MET	splice_region_variant&intron_variant	.	.	2	695	0.00650249	0.000915903	0.0357143
Malignant	7	134221916	C	T	.	c.659+7C>T	AKR1B10	splice_region_variant&intron_variant	.	.	1	2304	0.0221354	0	0.00735294
Benign	7	134221916	C	T	.	c.659+7C>T	AKR1B10	splice_region_variant&intron_variant	.	.	4	1171.75	0.0415765	0.0120691	0.0714286
Malignant	7	151851245	GA	G	.	c.12140-15delT	KMT2C	splice_region_variant&intron_variant	.	.	2	2067.5	0.00531258	0.000112373	0.0147059
Benign	7	151851245	GA	G	.	c.12140-15delT	KMT2C	splice_region_variant&intron_variant	.	.	3	1871	0.00733412	0.00230354	0.0535714
Malignant	7	151851544	A	C	.	c.11961-14T>G	KMT2C	splice_region_variant&intron_variant	.	.	3	1177	0.167305	0.103153	0.0220588
Benign	7	151851544	A	C	.	c.11961-14T>G	KMT2C	splice_region_variant&intron_variant	.	.	2	675	0.209431	0.00257658	0.0357143
Malignant	7	151859239	T	G	p.Asn3808Thr	c.11423A>C	KMT2C	missense_variant	.	.	3	1043.33	0.00643635	0.00093167	0.0220588
Benign	7	151859239	T	G	p.Asn3808Thr	c.11423A>C	KMT2C	missense_variant	.	.	2	1299.5	0.0056873	0.000293559	0.0357143
Malignant	7	151902223	G	T	p.Ser1310Tyr	c.3929C>A	KMT2C	missense_variant	1	0	4	1462.75	0.00670696	0.000896753	0.0294118
Benign	7	151902223	G	T	p.Ser1310Tyr	c.3929C>A	KMT2C	missense_variant	1	0	1	1698	0.00588928	0	0.0178571
Malignant	7	151927351	T	G	p.Asn942Thr	c.2825A>C	KMT2C	missense_variant	1	0	1	704	0.00568182	0	0.00735294
Benign	7	151927351	T	G	p.Asn942Thr	c.2825A>C	KMT2C	missense_variant	1	0	4	1577.75	0.00695514	0.00145232	0.0714286
Malignant	7	151945349	T	A	p.Lys724*	c.2170A>T	KMT2C	stop_gained	2	0	1	1250	0.0072	0	0.00735294
Benign	7	151945349	T	A	p.Lys724*	c.2170A>T	KMT2C	stop_gained	2	0	4	3371.5	0.00804963	0.00129732	0.0714286
Malignant	8	113871354	C	A	.	c.1755+20G>T	CSMD3	splice_region_variant&intron_variant	.	.	4	917.5	0.00755151	0.00313754	0.0294118
Benign	8	113871354	C	A	.	c.1755+20G>T	CSMD3	splice_region_variant&intron_variant	.	.	1	1579	0.0050665	0	0.0178571
Malignant	9	21971161	T	C	p.His66Arg	c.197A>G	CDKN2A	missense_variant	4	0	4	2042.75	0.00533485	0.000200459	0.0294118
Benign	9	21971161	T	C	p.His66Arg	c.197A>G	CDKN2A	missense_variant	4	0	1	3652	0.00575027	0	0.0178571
Malignant	9	133747538	A	T	p.Glu301Val	c.902A>T	ABL1	missense_variant	1	0	3	1145.33	0.00657097	0.000778622	0.0220588
Benign	9	133747538	A	T	p.Glu301Val	c.902A>T	ABL1	missense_variant	1	0	2	1474.5	0.00543112	4.19021e-05	0.0357143
Malignant	9	139400092	T	G	p.Lys1419Thr	c.4256A>C	NOTCH1	missense_variant	.	.	3	1812.67	0.00634252	0.00126052	0.0220588
Benign	9	139400092	T	G	p.Lys1419Thr	c.4256A>C	NOTCH1	missense_variant	.	.	2	2432	0.00557805	0.00013031	0.0357143
Malignant	9	139405685	T	G	p.Ser836Arg	c.2506A>C	NOTCH1	missense_variant	.	.	4	3649	0.00727699	0.0014798	0.0294118
Benign	9	139405685	T	G	p.Ser836Arg	c.2506A>C	NOTCH1	missense_variant	.	.	1	921	0.00868621	0	0.0178571
Malignant	10	43600612	A	C	p.Ser280Arg	c.838A>C	RET	missense_variant	.	.	3	1859	0.00647414	0.000719185	0.0220588
Benign	10	43600612	A	C	p.Ser280Arg	c.838A>C	RET	missense_variant	.	.	2	1265	0.00528647	0.000258817	0.0357143
Malignant	10	89720711	G	T	p.Glu461*	c.1381G>T	PTEN	stop_gained	7	0	4	1263.5	0.00620168	0.000808875	0.0294118
Benign	10	89720711	G	T	p.Glu461*	c.1381G>T	PTEN	stop_gained	9	0	1	2136	0.00514981	0	0.0178571
Malignant	11	533625	A	C	.	c.291-13T>G	HRAS	splice_region_variant&intron_variant	.	.	2	2520.5	0.00575182	0.000163002	0.0147059
Benign	11	533625	A	C	.	c.291-13T>G	HRAS	splice_region_variant&intron_variant	.	.	3	1939.33	0.00686763	0.00095601	0.0535714
Malignant	11	20658869	C	T	.	c.1869+20C>T	SLC6A5	splice_region_variant&intron_variant	.	.	4	1208.75	0.00691749	0.00134205	0.0294118
Benign	11	20658869	C	T	.	c.1869+20C>T	SLC6A5	splice_region_variant&intron_variant	.	.	1	1074	0.00744879	0	0.0178571
Malignant	12	43826289	A	AT	.	c.2932-19_2932-18insA	ADAMTS20	splice_region_variant&intron_variant	.	.	3	1777.33	0.00589484	0.000849532	0.0220588
Benign	12	43826289	A	AT	.	c.2932-19_2932-18insA	ADAMTS20	splice_region_variant&intron_variant	.	.	2	1920	0.00568514	0.000665618	0.0357143
Malignant	13	48954282	C	T	.	c.1422-19C>T	RB1	splice_region_variant&intron_variant	.	.	4	593.75	0.00640019	0.00105865	0.0294118
Benign	13	48954282	C	T	.	c.1422-19C>T	RB1	splice_region_variant&intron_variant	.	.	1	1029	0.00680272	0	0.0178571
Malignant	17	7578248	A	C	p.Leu201Val	c.601T>G	TP53	missense_variant	1	0	3	5503.33	0.00832385	0.00212546	0.0220588
Benign	17	7578248	A	C	p.Leu201Val	c.601T>G	TP53	missense_variant	1	0	2	1983	0.00671244	0.00102565	0.0357143
Malignant	17	10438490	G	A	p.Leu694Phe	c.2080C>T	MYH2	missense_variant	.	.	3	1787.67	0.00722723	0.0017821	0.0220588
Benign	17	10438490	G	A	p.Leu694Phe	c.2080C>T	MYH2	missense_variant	.	.	2	2310.5	0.00649227	1.23969e-06	0.0357143
Malignant	17	29483002	T	G	p.Leu21Arg	c.62T>G	NF1	missense_variant	1	0	3	669.667	0.00679156	0.00175462	0.0220588
Benign	17	29483002	T	G	p.Leu21Arg	c.62T>G	NF1	missense_variant	1	0	2	836.5	0.00597765	4.64491e-05	0.0357143
Malignant	17	29497004	G	A	p.Arg192Gln	c.575G>A	NF1	missense_variant	1	0	2	622	0.00745712	0.00175098	0.0147059
Benign	17	29497004	G	A	p.Arg192Gln	c.575G>A	NF1	missense_variant	1	0	3	601.667	0.00879509	0.00419654	0.0535714
Malignant	17	29677356	T	A	.	c.7457+20T>A	NF1	splice_region_variant&intron_variant	.	.	4	880	0.00560783	0.000497433	0.0294118
Benign	17	29677356	T	A	.	c.7457+20T>A	NF1	splice_region_variant&intron_variant	.	.	1	743	0.00672948	0	0.0178571
Malignant	19	11169468	G	A	p.Arg1545His	c.4634G>A	SMARCA4	missense_variant	1	0	3	847	0.00548284	0.000339073	0.0220588
Benign	19	11169468	G	A	p.Arg1545His	c.4634G>A	SMARCA4	missense_variant	1	0	2	633	0.00550617	0.000224484	0.0357143
Malignant	19	11169520	G	A	p.Met1562Ile	c.4686G>A	SMARCA4	missense_variant	.	.	2	929.5	0.00580194	0.000277083	0.0147059
Benign	19	11169520	G	A	p.Met1562Ile	c.4686G>A	SMARCA4	missense_variant	.	.	3	679	0.00590598	9.17728e-05	0.0535714
Malignant	X	29938086	G	T	p.Gly311Val	c.932G>T	IL1RAPL1	missense_variant	1	1	4	697	0.00539459	0.000153577	0.0294118
Benign	X	29938086	G	T	p.Gly311Val	c.932G>T	IL1RAPL1	missense_variant	1	1	1	507	0.00591716	0	0.0178571
Malignant	1	158581126	C	G	p.Met2396Ile	c.7188G>C	SPTA1	missense_variant	.	.	1	1176	0.00510204	0	0.00735294
Benign	1	158581126	C	G	p.Met2396Ile	c.7188G>C	SPTA1	missense_variant	.	.	3	1238.33	0.00731563	0.00103133	0.0535714
Malignant	1	158604473	A	C	.	c.5433-8T>G	SPTA1	splice_region_variant&intron_variant	.	.	2	965	0.00665461	0.00103031	0.0147059
Benign	1	158604473	A	C	.	c.5433-8T>G	SPTA1	splice_region_variant&intron_variant	.	.	2	2113.5	0.00538681	0.00035325	0.0357143
Malignant	1	158632477	T	G	.	c.2464+15A>C	SPTA1	splice_region_variant&intron_variant	.	.	3	1465.33	0.00664835	0.000293733	0.0220588
Benign	1	158632477	T	G	.	c.2464+15A>C	SPTA1	splice_region_variant&intron_variant	.	.	1	777	0.00514801	0	0.0178571
Malignant	1	158637662	G	T	p.Ala675Asp	c.2024C>A	SPTA1	missense_variant	1	1	3	804	0.00795021	0.000944945	0.0220588
Benign	1	158637662	G	T	p.Ala675Asp	c.2024C>A	SPTA1	missense_variant	1	1	1	2730	0.00512821	0	0.0178571
Malignant	1	158651445	C	G	p.Glu135Gln	c.403G>C	SPTA1	missense_variant	1	1	1	1566	0.00574713	0	0.00735294
Benign	1	158651445	C	G	p.Glu135Gln	c.403G>C	SPTA1	missense_variant	1	1	3	1910	0.00722355	0.00286224	0.0535714
Malignant	1	237655201	G	T	p.Asp602Tyr	c.1804G>T	RYR2	missense_variant	1	0	3	702.333	0.00752815	0.00260909	0.0220588
Benign	1	237655201	G	T	p.Asp602Tyr	c.1804G>T	RYR2	missense_variant	1	0	1	787	0.00508259	0	0.0178571
Malignant	1	237656244	C	A	.	c.1828-10C>A	RYR2	splice_region_variant&intron_variant	.	.	1	961	0.00520291	0	0.00735294
Benign	1	237656244	C	A	.	c.1828-10C>A	RYR2	splice_region_variant&intron_variant	.	.	3	2108.33	0.00666659	0.000955957	0.0535714
Malignant	1	237756789	T	G	p.Val1430Gly	c.4289T>G	RYR2	missense_variant	1	0	3	2131	0.00851191	0.00307337	0.0220588
Benign	1	237756789	T	G	p.Val1430Gly	c.4289T>G	RYR2	missense_variant	1	0	1	1780	0.0134831	0	0.0178571
Malignant	1	237905620	G	T	p.Asp3706Tyr	c.11116G>T	RYR2	missense_variant	.	.	3	987	0.00597781	0.000441422	0.0220588
Benign	1	237905620	G	T	p.Asp3706Tyr	c.11116G>T	RYR2	missense_variant	.	.	1	1213	0.00577082	0	0.0178571
Malignant	1	237905630	A	T	p.Glu3709Val	c.11126A>T	RYR2	missense_variant	.	.	3	1450.33	0.0052521	0.000155537	0.0220588
Benign	1	237905630	A	T	p.Glu3709Val	c.11126A>T	RYR2	missense_variant	.	.	1	1722	0.00638792	0	0.0178571
Malignant	1	237965186	G	T	p.Met4707Ile	c.14121G>T	RYR2	missense_variant	1	0	3	935.667	0.00733261	0.00137094	0.0220588
Benign	1	237965186	G	T	p.Met4707Ile	c.14121G>T	RYR2	missense_variant	1	0	1	1433	0.00558269	0	0.0178571
Malignant	2	29443625	G	A	p.Leu1198Phe	c.3592C>T	ALK	missense_variant	1	0	1	3195	0.00688576	0	0.00735294
Benign	2	29443625	G	A	p.Leu1198Phe	c.3592C>T	ALK	missense_variant	1	0	3	2834.67	0.00607993	0.00131978	0.0535714
Malignant	2	29451828	A	C	p.Trp913Gly	c.2737T>G	ALK	missense_variant	.	.	3	644.667	0.00737536	0.00104584	0.0220588
Benign	2	29451828	A	C	p.Trp913Gly	c.2737T>G	ALK	missense_variant	.	.	1	808	0.00618812	0	0.0178571
Malignant	2	29917730	T	G	p.Lys313Thr	c.938A>C	ALK	missense_variant	1	0	3	1842.67	0.00591294	0.000563389	0.0220588
Benign	2	29917730	T	G	p.Lys313Thr	c.938A>C	ALK	missense_variant	1	0	1	1857	0.00538503	0	0.0178571
Malignant	2	50724523	G	T	p.Leu983Ile	c.2947C>A	NRXN1	missense_variant	.	.	3	1072.67	0.00711177	0.00143823	0.0220588
Benign	2	50724523	G	T	p.Leu983Ile	c.2947C>A	NRXN1	missense_variant	.	.	1	2055	0.0053528	0	0.0178571
Malignant	2	80101339	T	G	p.Asp241Glu	c.723T>G	CTNNA2	missense_variant	1	0	2	3337	0.0086054	0.00251944	0.0147059
Benign	2	80101339	T	G	p.Asp241Glu	c.723T>G	CTNNA2	missense_variant	1	0	2	2620	0.00520349	0.000119198	0.0357143
Malignant	2	116593723	TC	T	.	c.2002-3delC	DPP10	splice_region_variant&intron_variant	.	.	1	1236	0.00647249	0	0.00735294
Benign	2	116593723	TC	T	.	c.2002-3delC	DPP10	splice_region_variant&intron_variant	.	.	3	802.667	0.00631113	0.000433086	0.0535714
Malignant	2	141459273	C	A	.	c.6427+17G>T	LRP1B	splice_region_variant&intron_variant	.	.	3	704.333	0.00689669	0.00232817	0.0220588
Benign	2	141459273	C	A	.	c.6427+17G>T	LRP1B	splice_region_variant&intron_variant	.	.	1	1819	0.00549753	0	0.0178571
Malignant	2	142012218	G	GA	.	c.344-9dupT	LRP1B	splice_region_variant&intron_variant	.	.	3	1247.33	0.196494	0.0111117	0.0220588
Benign	2	142012218	G	GA	.	c.344-9dupT	LRP1B	splice_region_variant&intron_variant	.	.	1	706	0.201133	0	0.0178571
Malignant	3	10183764	A	C	p.Asn78Thr	c.233A>C	VHL	missense_variant	3	0	2	1659	0.00603095	1.59128e-05	0.0147059
Benign	3	10183764	A	C	p.Asn78Thr	c.233A>C	VHL	missense_variant	3	0	2	2886.5	0.00766259	0.000759235	0.0357143
Malignant	3	41266165	A	C	p.Glu54Asp	c.162A>C	CTNNB1	missense_variant	1	0	3	1473.33	0.0109866	0.00288605	0.0220588
Benign	3	41266165	A	C	p.Glu54Asp	c.162A>C	CTNNB1	missense_variant	1	0	1	1794	0.00501672	0	0.0178571
Malignant	3	41280611	C	A	.	c.2138-14C>A	CTNNB1	splice_region_variant&intron_variant	.	.	3	1145.33	0.00740217	0.00176447	0.0220588
Benign	3	41280611	C	A	.	c.2138-14C>A	CTNNB1	splice_region_variant&intron_variant	.	.	1	1161	0.00516796	0	0.0178571
Malignant	3	47163304	T	C	p.Lys941Arg	c.2822A>G	SETD2	missense_variant	.	.	3	1276.33	0.00806743	0.00405389	0.0220588
Benign	3	47163304	T	C	p.Lys941Arg	c.2822A>G	SETD2	missense_variant	.	.	1	1579	0.00569981	0	0.0178571
Malignant	3	47164388	C	A	p.Glu580*	c.1738G>T	SETD2	stop_gained	1	0	3	750	0.0071407	0.00273037	0.0220588
Benign	3	47164388	C	A	p.Glu580*	c.1738G>T	SETD2	stop_gained	1	0	1	1494	0.00535475	0	0.0178571
Malignant	3	178927974	G	T	p.Glu418*	c.1252G>T	PIK3CA	stop_gained	1	0	2	529	0.011349	0.000278898	0.0147059
Benign	3	178927974	G	T	p.Glu418*	c.1252G>T	PIK3CA	stop_gained	1	0	2	2709	0.00517078	1.30109e-05	0.0357143
Malignant	6	70859796	T	G	p.Asp661Glu	c.1983T>G	COL19A1	missense_variant	.	.	3	1334.67	0.00596633	0.000482989	0.0220588
Benign	6	70859796	T	G	p.Asp661Glu	c.1983T>G	COL19A1	missense_variant	.	.	1	1852	0.00593952	0	0.0178571
Malignant	6	117622216	G	T	p.Phe2218Leu	c.6654C>A	ROS1	missense_variant	.	.	3	1212.67	0.00557627	0.000802669	0.0220588
Benign	6	117622216	G	T	p.Phe2218Leu	c.6654C>A	ROS1	missense_variant	.	.	1	1146	0.0052356	0	0.0178571
Malignant	6	117639419	T	C	p.?	c.5941-4A>G	ROS1	splice_region_variant&intron_variant	6	1	3	649.667	0.22148	0.00348692	0.0220588
Benign	6	117639419	T	C	p.?	c.5941-4A>G	ROS1	splice_region_variant&intron_variant	6	1	1	600	0.235	0	0.0178571
Malignant	6	117663568	T	G	p.Asn1555Thr	c.4664A>C	ROS1	missense_variant	.	.	2	864	0.00521753	2.72219e-05	0.0147059
Benign	6	117663568	T	G	p.Asn1555Thr	c.4664A>C	ROS1	missense_variant	.	.	2	1477	0.0067527	0.00165066	0.0357143
Malignant	6	117706907	G	A	p.Ala748Val	c.2243C>T	ROS1	missense_variant	.	.	1	1376	0.00581395	0	0.00735294
Benign	6	117706907	G	A	p.Ala748Val	c.2243C>T	ROS1	missense_variant	.	.	3	1463	0.00571938	0.000365991	0.0535714
Malignant	7	11514090	A	G	p.Ile708Thr	c.2123T>C	THSD7A	missense_variant	.	.	2	759	0.00676016	0.000606318	0.0147059
Benign	7	11514090	A	G	p.Ile708Thr	c.2123T>C	THSD7A	missense_variant	.	.	2	1427.5	0.00657617	0.000233677	0.0357143
Malignant	7	14775666	C	T	p.Gly108Ser	c.322G>A	DGKB	missense_variant&splice_region_variant	.	.	1	1221	0.00573301	0	0.00735294
Benign	7	14775666	C	T	p.Gly108Ser	c.322G>A	DGKB	missense_variant&splice_region_variant	.	.	3	1243.67	0.00531639	0.000144066	0.0535714
Malignant	7	31848625	A	G	.	c.2071+20T>C	PDE1C	splice_region_variant&intron_variant	.	.	3	1113.33	0.00540961	0.00031814	0.0220588
Benign	7	31848625	A	G	.	c.2071+20T>C	PDE1C	splice_region_variant&intron_variant	.	.	1	556	0.00719424	0	0.0178571
Malignant	7	140434542	C	G	p.Arg719Pro	c.2156G>C	BRAF	missense_variant	1	0	2	1492	0.00745707	0.00160911	0.0147059
Benign	7	140434542	C	G	p.Arg719Pro	c.2156G>C	BRAF	missense_variant	1	0	2	1920.5	0.00585713	0.000658946	0.0357143
Malignant	7	151849840	C	T	p.Ser4159Asn	c.12476G>A	KMT2C	missense_variant	.	.	2	1445	0.0062324	0.000726546	0.0147059
Benign	7	151849840	C	T	p.Ser4159Asn	c.12476G>A	KMT2C	missense_variant	.	.	2	2343.5	0.00724922	0.00197091	0.0357143
Malignant	7	151849910	A	C	p.Leu4136Val	c.12406T>G	KMT2C	missense_variant	.	.	3	2283.67	0.00588698	0.00111155	0.0220588
Benign	7	151849910	A	C	p.Leu4136Val	c.12406T>G	KMT2C	missense_variant	.	.	1	3325	0.00721805	0	0.0178571
Malignant	7	151859929	T	G	p.His3578Pro	c.10733A>C	KMT2C	missense_variant	.	.	3	2754.33	0.00775915	0.00182896	0.0220588
Benign	7	151859929	T	G	p.His3578Pro	c.10733A>C	KMT2C	missense_variant	.	.	1	1756	0.00512528	0	0.0178571
Malignant	7	151864239	G	T	p.Leu3248Ile	c.9742C>A	KMT2C	missense_variant	1	0	3	1263.67	0.0054597	0.000405324	0.0220588
Benign	7	151864239	G	T	p.Leu3248Ile	c.9742C>A	KMT2C	missense_variant	1	0	1	1338	0.00523169	0	0.0178571
Malignant	7	151884359	C	A	p.Glu1666*	c.4996G>T	KMT2C	stop_gained	3	0	3	1003.67	0.00805526	0.0035702	0.0220588
Benign	7	151884359	C	A	p.Glu1666*	c.4996G>T	KMT2C	stop_gained	3	0	1	1873	0.00533903	0	0.0178571
Malignant	7	151919159	G	A	p.?	c.3434-8C>T	KMT2C	splice_region_variant&intron_variant	2	0	2	910.5	0.00737256	0.00106626	0.0147059
Benign	7	151919159	G	A	p.?	c.3434-8C>T	KMT2C	splice_region_variant&intron_variant	2	0	2	816	0.00544146	0.000251144	0.0357143
Malignant	7	151927021	C	A	p.Cys988Phe	c.2963G>T	KMT2C	missense_variant	75	0	2	4560	0.216628	0.00621059	0.0147059
Benign	7	151927021	C	A	p.Cys988Phe	c.2963G>T	KMT2C	missense_variant	75	0	2	3796	0.184542	0.00808584	0.0357143
Malignant	7	151960202	C	T	p.Asp400Asn	c.1198G>A	KMT2C	missense_variant	1	0	3	927.333	0.00689414	0.00203189	0.0220588
Benign	7	151960202	C	T	p.Asp400Asn	c.1198G>A	KMT2C	missense_variant	1	0	1	632	0.00632911	0	0.0178571
Malignant	8	51314806	C	A	p.Gln22Lys	c.64C>A	SNTG1	missense_variant	1	1	3	905.333	0.010546	0.00422582	0.0220588
Benign	8	51314806	C	A	p.Gln22Lys	c.64C>A	SNTG1	missense_variant	1	1	1	2226	0.00763702	0	0.0178571
Malignant	8	113241037	G	T	p.Pro3638Thr	c.10912C>A	CSMD3	missense_variant	.	.	1	565	0.00707965	0	0.00735294
Benign	8	113241037	G	T	p.Pro3638Thr	c.10912C>A	CSMD3	missense_variant	.	.	3	2923.33	0.00535798	2.17684e-05	0.0535714
Malignant	8	113246706	C	A	p.Gly3543Val	c.10628G>T	CSMD3	missense_variant&splice_region_variant	1	1	2	557	0.00625602	0.000279926	0.0147059
Benign	8	113246706	C	A	p.Gly3543Val	c.10628G>T	CSMD3	missense_variant&splice_region_variant	1	1	2	1247.5	0.0059606	0.000166854	0.0357143
Malignant	8	113253998	C	A	p.Leu3473Phe	c.10419G>T	CSMD3	missense_variant	.	.	2	1059	0.0059289	0.000787515	0.0147059
Benign	8	113253998	C	A	p.Leu3473Phe	c.10419G>T	CSMD3	missense_variant	.	.	2	1778.5	0.00594033	0.000626834	0.0357143
Malignant	9	79954412	T	G	.	c.6379-20T>G	VPS13A	splice_region_variant&intron_variant	.	.	3	954.333	0.00585399	0.000680588	0.0220588
Benign	9	79954412	T	G	.	c.6379-20T>G	VPS13A	splice_region_variant&intron_variant	.	.	1	1626	0.00615006	0	0.0178571
Malignant	9	139391359	C	T	p.Val2278Met	c.6832G>A	NOTCH1	missense_variant	1	0	3	1691.33	0.00663865	0.000320828	0.0220588
Benign	9	139391359	C	T	p.Val2278Met	c.6832G>A	NOTCH1	missense_variant	1	0	1	1189	0.00672834	0	0.0178571
Malignant	9	139400343	A	C	p.?	c.4015-10T>G	NOTCH1	splice_region_variant&intron_variant	1	0	1	675	0.00592593	0	0.00735294
Benign	9	139400343	A	C	p.?	c.4015-10T>G	NOTCH1	splice_region_variant&intron_variant	1	0	3	2090	0.00630849	0.00134417	0.0535714
Malignant	9	139407501	G	T	p.Tyr813*	c.2439C>A	NOTCH1	stop_gained	1	1	2	604.5	0.00749731	0.0011682	0.0147059
Benign	9	139407501	G	T	p.Tyr813*	c.2439C>A	NOTCH1	stop_gained	1	1	2	656.5	0.00614168	0.000547279	0.0357143
Malignant	10	89720727	G	T	p.Gly466Val	c.1397G>T	PTEN	missense_variant	1	0	2	544	0.0111552	0.00402507	0.0147059
Benign	10	89720727	G	T	p.Gly466Val	c.1397G>T	PTEN	missense_variant	1	0	2	1404	0.00702729	0.00148852	0.0357143
Malignant	11	1651540	C	G	p.Ser157Cys	c.470C>G	KRTAP5-5	missense_variant	4	0	1	514	0.00583658	0	0.00735294
Benign	11	1651540	C	G	p.Ser157Cys	c.470C>G	KRTAP5-5	missense_variant	4	0	3	808.333	0.00742172	0.000954791	0.0535714
Malignant	11	108173645	G	A	p.Trp1795*	c.5385G>A	ATM	stop_gained	1	0	1	1543	0.00518471	0	0.00735294
Benign	11	108173645	G	A	p.Trp1795*	c.5385G>A	ATM	stop_gained	1	0	3	2097.67	0.00543725	0.000269303	0.0535714
Malignant	11	119148879	C	A	p.Gln367Lys	c.1099C>A	CBL	missense_variant	.	.	3	852.333	0.0060246	0.000635141	0.0220588
Benign	11	119148879	C	A	p.Gln367Lys	c.1099C>A	CBL	missense_variant	.	.	1	902	0.00554324	0	0.0178571
Malignant	13	48934179	C	A	p.Leu212Met	c.634C>A	RB1	missense_variant	1	1	1	588	0.00510204	0	0.00735294
Benign	13	48934179	C	A	p.Leu212Met	c.634C>A	RB1	missense_variant	1	1	3	650.667	0.00639595	0.00127642	0.0535714
Malignant	14	105241426	A	G	p.Val185Ala	c.554T>C	AKT1	missense_variant	1	0	1	562	0.00533808	0	0.00735294
Benign	14	105241426	A	G	p.Val185Ala	c.554T>C	AKT1	missense_variant	1	0	3	3308	0.00576532	0.00055842	0.0535714
Malignant	15	66779574	A	C	p.Met302Leu	c.904A>C	MAP2K1	missense_variant	.	.	3	775.333	0.00790364	0.00233951	0.0220588
Benign	15	66779574	A	C	p.Met302Leu	c.904A>C	MAP2K1	missense_variant	.	.	1	802	0.00623441	0	0.0178571
Malignant	17	7579738	G	T	.	c.75-17C>A	TP53	splice_region_variant&intron_variant	.	.	1	1266	0.00631912	0	0.00735294
Benign	17	7579738	G	T	.	c.75-17C>A	TP53	splice_region_variant&intron_variant	.	.	3	3563	0.0059618	0.000531264	0.0535714
Malignant	17	10427933	T	G	p.Glu1675Asp	c.5025A>C	MYH2	missense_variant	.	.	1	1301	0.00614912	0	0.00735294
Benign	17	10427933	T	G	p.Glu1675Asp	c.5025A>C	MYH2	missense_variant	.	.	3	3737.67	0.00554832	0.000321491	0.0535714
Malignant	17	29676219	G	T	p.Arg2424Ile	c.7271G>T	NF1	missense_variant	1	0	3	1008	0.00597348	8.93123e-05	0.0220588
Benign	17	29676219	G	T	p.Arg2424Ile	c.7271G>T	NF1	missense_variant	1	0	1	1132	0.00530035	0	0.0178571
Malignant	17	29677354	C	A	.	c.7457+18C>A	NF1	splice_region_variant&intron_variant	.	.	3	911	0.00711746	0.00117567	0.0220588
[truncated: 403 more rows]

## Sheet: Malignant_specific
clinical	chr	position	ref	alt	HGVS_P	HGVS_C	gene	variant_type	COSMIC_CNT	CNT_LUNG	No. Samples	Average Depth	Avg MAF	SD	% Occurrence
Malignant	11	1651411	G	T	p.Gly114Val	c.341G>T	KRTAP5-5	missense_variant	1	0	21	616.714	0.032059	0.0160336	0.154412
Malignant	2	30143429	C	A	p.Ala33Ser	c.97G>T	ALK	missense_variant	.	.	15	1895.27	0.00664488	0.00171401	0.110294
Malignant	8	113662460	C	A	p.Arg1041Ser	c.3123G>T	CSMD3	missense_variant	1	0	15	1740.4	0.00770746	0.00207215	0.110294
Malignant	9	79952278	G	T	p.Arg2068Ile	c.6203G>T	VPS13A	missense_variant	.	.	13	1425.15	0.00658732	0.00134974	0.0955882
Malignant	1	181764163	G	A	p.Arg2064His	c.6191G>A	CACNA1E	missense_variant	1	0	11	2215.36	0.00580864	0.000859029	0.0808824
Malignant	2	29451803	A	C	p.Phe921Cys	c.2762T>G	ALK	missense_variant	.	.	11	671.273	0.00754151	0.00321409	0.0808824
Malignant	8	51314762	A	T	.	c.28-8A>T	SNTG1	splice_region_variant&intron_variant	.	.	11	1430.45	0.00692671	0.00234556	0.0808824
Malignant	10	89685281	C	A	p.Ser232*	c.695C>A	PTEN	stop_gained	6	0	11	2315.18	0.00678969	0.00109811	0.0808824
Malignant	10	89711931	G	T	p.Lys356Asn	c.1068G>T	PTEN	missense_variant	2	0	11	1837.82	0.00781031	0.00340777	0.0808824
Malignant	17	29663653	G	T	p.Val2050Phe	c.6148G>T	NF1	missense_variant	.	.	11	885.545	0.00689225	0.00296839	0.0808824
Malignant	11	1651607	T	G	p.Cys179Trp	c.537T>G	KRTAP5-5	missense_variant	.	.	10	1587.6	0.00726918	0.00113146	0.0735294
Malignant	17	29557953	G	A	p.?	c.3197+10G>A	NF1	splice_region_variant&intron_variant	2	0	10	735.9	0.0083399	0.00226649	0.0735294
Malignant	1	237905587	A	T	.	c.11092-9A>T	RYR2	splice_region_variant&intron_variant	.	.	9	912.333	0.00637544	0.0014674	0.0661765
Malignant	2	29451802	G	C	p.Phe921Leu	c.2763C>G	ALK	missense_variant	.	.	9	709	0.0121223	0.00621997	0.0661765
Malignant	2	141298674	T	C	p.?	c.7388-7A>G	LRP1B	splice_region_variant&intron_variant	18	0	9	1419.67	0.234708	0.0139319	0.0661765
Malignant	17	29663640	T	A	.	c.6148-13T>A	NF1	splice_region_variant&intron_variant	.	.	9	836.444	0.0061365	0.000960906	0.0661765
Malignant	1	158636235	T	G	p.Glu697Asp	c.2091A>C	SPTA1	missense_variant	.	.	8	1996.75	0.00664709	0.00188331	0.0588235
Malignant	1	181752923	AAGCTT	A	.	c.5470+11_5470+15delCTTAG	CACNA1E	splice_region_variant&intron_variant	.	.	8	975.875	0.234686	0.0184754	0.0588235
Malignant	1	237664056	G	C	p.Arg750Thr	c.2249G>C	RYR2	missense_variant	1	1	8	1411	0.0117468	0.00348066	0.0588235
Malignant	2	141458173	T	A	p.Arg2149Trp	c.6445A>T	LRP1B	missense_variant	.	.	8	2738.75	0.00596907	0.00126214	0.0588235
Malignant	8	113308243	A	G	.	c.8441-8T>C	CSMD3	splice_region_variant&intron_variant	.	.	8	1542.88	0.237901	0.011355	0.0588235
Malignant	10	89685300	C	A	p.Tyr238*	c.714C>A	PTEN	stop_gained	5	0	8	1867.62	0.00597543	0.00069026	0.0588235
Malignant	21	10951314	A	C	p.Ile133Ser	c.398T>G	TPTE	missense_variant	.	.	8	2764	0.00748116	0.00280771	0.0588235
Malignant	3	37067191	T	A	p.Ser368Thr	c.1102T>A	MLH1	missense_variant	.	.	7	1175.71	0.0061268	0.00137274	0.0514706
Malignant	4	1807768	C	T	.	c.1843-10C>T	FGFR3	splice_region_variant&intron_variant	.	.	7	2059.14	0.00576874	0.000835979	0.0514706
Malignant	6	70894579	CT	C	.	c.2776-9delT	COL19A1	splice_region_variant&intron_variant	.	.	7	970.857	0.00600159	0.000895881	0.0514706
Malignant	8	113662510	C	A	p.Asp1025Tyr	c.3073G>T	CSMD3	missense_variant	1	0	7	1433.71	0.0072879	0.00202034	0.0514706
Malignant	10	89692781	C	A	p.Pro262Thr	c.784C>A	PTEN	missense_variant	1	0	7	1273.14	0.00801547	0.00256584	0.0514706
Malignant	1	27092755	A	C	p.Thr926Pro	c.2776A>C	ARID1A	missense_variant	.	.	6	1006	0.00914118	0.00525394	0.0441176
Malignant	1	157805738	T	G	p.Lys88Thr	c.263A>C	CD5L	missense_variant	1	0	6	2407.83	0.00714446	0.00128808	0.0441176
Malignant	1	158615135	T	G	p.Gln1346Pro	c.4037A>C	SPTA1	missense_variant	.	.	6	2090.67	0.00866204	0.00394992	0.0441176
Malignant	1	237617764	C	A	p.Leu456Met	c.1366C>A	RYR2	missense_variant	1	1	6	1303.5	0.00800525	0.00391279	0.0441176
Malignant	5	19838916	G	T	p.Phe60Leu	c.180C>A	CDH18	missense_variant	1	0	6	1915.5	0.00814075	0.00377045	0.0441176
Malignant	7	151970931	G	A	p.Leu291Phe	c.871C>T	KMT2C	missense_variant	27	0	6	3208.83	0.224998	0.020885	0.0441176
Malignant	8	139165249	T	G	p.Asn490Thr	c.1469A>C	FAM135B	missense_variant	1	0	6	1487	0.0067049	0.00130531	0.0441176
Malignant	11	1651120	G	T	p.Arg17Leu	c.50G>T	KRTAP5-5	missense_variant	29	0	6	2533.5	0.196748	0.0861062	0.0441176
Malignant	11	1651197	G	T	p.Gly43*	c.127G>T	KRTAP5-5	stop_gained	.	.	6	1401.67	0.00669476	0.00121576	0.0441176
Malignant	12	43833743	C	A	p.Arg807Ile	c.2420G>T	ADAMTS20	missense_variant	1	0	6	1600.83	0.00720116	0.00239027	0.0441176
Malignant	14	105246504	A	C	p.Asp32Glu	c.96T>G	AKT1	missense_variant	.	.	6	4197.33	0.00786343	0.00345298	0.0441176
Malignant	17	7578397	T	G	p.His178Pro	c.533A>C	TP53	missense_variant	7	0	6	3971.17	0.00586303	0.00093088	0.0441176
Malignant	17	7578440	T	G	p.Lys164Gln	c.490A>C	TP53	missense_variant	2	2	6	5267.83	0.00578013	0.00061867	0.0441176
Malignant	17	10432562	A	T	p.Phe1091Ile	c.3271T>A	MYH2	missense_variant	.	.	6	1685.67	0.00581414	0.000813163	0.0441176
Malignant	21	10933891	G	T	p.Leu330Ile	c.988C>A	TPTE	missense_variant	1	1	6	2985.67	0.0081073	0.0026485	0.0441176
Malignant	1	27023490	A	C	p.Gln199Pro	c.596A>C	ARID1A	missense_variant	.	.	5	3709.6	0.00650018	0.00115573	0.0367647
Malignant	1	27099311	A	C	p.Asn1183Thr	c.3548A>C	ARID1A	missense_variant	.	.	5	1102.4	0.00638535	0.00158898	0.0367647
Malignant	1	120465294	T	G	p.Gln1656Pro	c.4967A>C	NOTCH2	missense_variant	1	0	5	1281	0.00724471	0.00246319	0.0367647
Malignant	2	141272360	G	A	.	c.8150-19C>T	LRP1B	splice_region_variant&intron_variant	.	.	5	1929	0.00630684	0.00129845	0.0367647
Malignant	2	141283566	G	T	.	c.7877-4C>A	LRP1B	splice_region_variant&intron_variant	.	.	5	1031.2	0.00904486	0.002891	0.0367647
Malignant	2	141777675	TA	T	p.?	c.1790-5delT	LRP1B	splice_region_variant&intron_variant	2	0	5	1450.2	0.00598642	0.000567987	0.0367647
Malignant	3	47125346	T	G	p.Asn1975Thr	c.5924A>C	SETD2	missense_variant	.	.	5	1291.8	0.0080296	0.00266947	0.0367647
Malignant	6	117650567	C	A	p.Gly1764Val	c.5291G>T	ROS1	missense_variant	1	1	5	1323.8	0.00863877	0.00236908	0.0367647
Malignant	8	114111197	T	A	p.?	c.710-5A>T	CSMD3	splice_region_variant&intron_variant	1	0	5	1217.4	0.178667	0.0892838	0.0367647
Malignant	10	89692782	C	A	p.Pro262His	c.785C>A	PTEN	missense_variant	1	0	5	767.2	0.00621472	0.00118896	0.0367647
Malignant	10	89711992	C	A	p.Pro377Thr	c.1129C>A	PTEN	missense_variant	2	0	5	1473.8	0.00718205	0.00246597	0.0367647
Malignant	11	1651471	G	T	p.Gly134Val	c.401G>T	KRTAP5-5	missense_variant	2	0	5	753.2	0.0105271	0.0034982	0.0367647
Malignant	11	20658786	G	T	p.Lys602Asn	c.1806G>T	SLC6A5	missense_variant	.	.	5	1757.8	0.00822956	0.0025745	0.0367647
Malignant	17	7573937	C	T	p.Ala364Thr	c.1090G>A	TP53	missense_variant	2	0	5	1024	0.00599155	0.000380155	0.0367647
Malignant	19	10600335	C	A	p.Arg507Leu	c.1520G>T	KEAP1	missense_variant	1	1	5	1848	0.00838061	0.00225059	0.0367647
Malignant	1	27023413	T	G	p.His173Gln	c.519T>G	ARID1A	missense_variant	.	.	4	3369	0.00592619	0.000488518	0.0294118
Malignant	1	27023700	A	G	p.Gln269Arg	c.806A>G	ARID1A	missense_variant	1	0	4	1809.75	0.00583006	0.000369222	0.0294118
Malignant	1	120483249	C	T	p.Gly1038Arg	c.3112G>A	NOTCH2	missense_variant	1	0	4	865.25	0.0070239	0.00181567	0.0294118
Malignant	1	158583619	T	G	p.Lys2294Thr	c.6881A>C	SPTA1	missense_variant	1	0	4	1143.75	0.00912044	0.00413001	0.0294118
Malignant	1	158615109	G	T	p.Leu1355Ile	c.4063C>A	SPTA1	missense_variant	1	0	4	1635.75	0.00659337	0.00168611	0.0294118
Malignant	1	158615122	G	T	p.Asp1350Glu	c.4050C>A	SPTA1	missense_variant	.	.	4	1954.25	0.00769195	0.00128899	0.0294118
Malignant	1	237617805	T	G	p.His469Gln	c.1407T>G	RYR2	missense_variant	.	.	4	1241.25	0.00893589	0.00345633	0.0294118
Malignant	2	29451822	A	C	p.Trp915Gly	c.2743T>G	ALK	missense_variant	1	0	4	810.75	0.00649659	0.00089723	0.0294118
Malignant	2	80801271	T	G	.	c.1742-17T>G	CTNNA2	splice_region_variant&intron_variant	.	.	4	1987	0.00569535	0.000233946	0.0294118
Malignant	2	116485436	G	T	p.Lys224Asn	c.672G>T	DPP10	missense_variant	1	1	4	832.5	0.00566555	0.000361616	0.0294118
Malignant	2	116497484	A	C	.	c.903+15A>C	DPP10	splice_region_variant&intron_variant	.	.	4	1094.5	0.00720269	0.00127717	0.0294118
Malignant	2	141283540	G	T	p.Phe2633Leu	c.7899C>A	LRP1B	missense_variant	1	0	4	1026.5	0.00888517	0.00432511	0.0294118
Malignant	2	141571259	C	A	p.Glu1776*	c.5326G>T	LRP1B	stop_gained	2	0	4	1473.25	0.00603068	0.000697759	0.0294118
Malignant	2	141751721	C	A	.	c.2504-17G>T	LRP1B	splice_region_variant&intron_variant	.	.	4	791.5	0.00590447	0.000791415	0.0294118
Malignant	2	141819622	G	T	p.Gln412Lys	c.1234C>A	LRP1B	missense_variant	.	.	4	925.75	0.0104087	0.00425751	0.0294118
Malignant	2	167262139	G	T	p.Ala1667Asp	c.5000C>A	SCN7A	missense_variant	2	0	4	1060.25	0.0073815	0.00221681	0.0294118
Malignant	2	178096380	A	C	p.Ile317Met	c.951T>G	NFE2L2	missense_variant	.	.	4	1610	0.00573337	0.000654521	0.0294118
Malignant	2	178098953	C	A	p.Gly31Val	c.92G>T	NFE2L2	missense_variant	2	1	4	1868	0.00665116	0.00140062	0.0294118
Malignant	2	178129264	T	C	p.Gln14Arg	c.41A>G	NFE2L2	missense_variant	.	.	4	1193.25	0.00683975	0.0010629	0.0294118
Malignant	3	10183754	A	C	p.Ile75Leu	c.223A>C	VHL	missense_variant	.	.	4	2903.5	0.00547044	0.000160612	0.0294118
Malignant	4	1804681	G	A	p.Arg324His	c.971G>A	FGFR3	missense_variant	.	.	4	1143.75	0.00569009	0.000357156	0.0294118
Malignant	4	55972913	C	A	p.Gly493*	c.1477G>T	KDR	stop_gained	1	1	4	846.5	0.00627739	0.000991055	0.0294118
Malignant	5	45695843	T	G	p.Lys118Thr	c.353A>C	HCN1	missense_variant	2	0	4	3439	0.0057904	0.000191917	0.0294118
Malignant	6	70875883	T	G	p.?	c.2445+6T>G	COL19A1	splice_region_variant&intron_variant	1	0	4	707.75	0.00822077	0.00277185	0.0294118
Malignant	6	117681516	G	A	p.Ser1145Phe	c.3434C>T	ROS1	missense_variant	1	0	4	781	0.00795013	0.00197255	0.0294118
Malignant	6	133785910	C	A	.	c.725-7C>A	EYA4	splice_region_variant&intron_variant	.	.	4	1277.5	0.00588846	0.000348854	0.0294118
Malignant	7	151874122	G	T	p.Leu2806Ile	c.8416C>A	KMT2C	missense_variant	1	0	4	1188.25	0.00848678	0.00205837	0.0294118
Malignant	7	151875104	A	T	.	c.7443-9T>A	KMT2C	splice_region_variant&intron_variant	.	.	4	1332	0.0128556	0.010476	0.0294118
Malignant	7	151932969	A	G	p.Leu901Pro	c.2702T>C	KMT2C	missense_variant	1	0	4	3822	0.213673	0.0169311	0.0294118
Malignant	8	3224788	G	GGA	.	c.2900-21_2900-20dupTC	CSMD1	splice_region_variant&intron_variant	.	.	4	1523.75	0.00536439	0.000322819	0.0294118
Malignant	8	51314761	A	T	.	c.28-9A>T	SNTG1	splice_region_variant&intron_variant	.	.	4	817.75	0.0065393	0.000777093	0.0294118
Malignant	8	113585890	C	A	.	c.3886-4G>T	CSMD3	splice_region_variant&intron_variant	.	.	4	1263	0.00580282	0.000391762	0.0294118
Malignant	8	113662513	G	T	p.His1024Asn	c.3070C>A	CSMD3	missense_variant	1	1	4	917.5	0.00862203	0.00178152	0.0294118
Malignant	9	79908437	T	A	.	c.3507+13T>A	VPS13A	splice_region_variant&intron_variant	.	.	4	905.75	0.0055966	0.000584083	0.0294118
Malignant	9	139405261	C	T	p.?	c.2588-4G>A	NOTCH1	splice_region_variant&intron_variant	52	0	4	1865.5	0.241937	0.00269851	0.0294118
Malignant	10	89685319	G	T	p.?	c.728+5G>T	PTEN	splice_region_variant&intron_variant	1	0	4	1114.5	0.00559248	0.000422046	0.0294118
Malignant	10	89720702	G	T	p.Glu458*	c.1372G>T	PTEN	stop_gained	4	0	4	756.25	0.00608887	0.000626263	0.0294118
Malignant	13	48919244	G	T	p.Glu137*	c.409G>T	RB1	stop_gained	6	0	4	1162.25	0.00672405	0.000446617	0.0294118
Malignant	13	49039163	G	T	p.Glu747Asp	c.2241G>T	RB1	missense_variant	.	.	4	897	0.0054535	0.000409904	0.0294118
Malignant	17	10426472	G	T	p.Leu1870Ile	c.5608C>A	MYH2	missense_variant	.	.	4	728.5	0.0108029	0.00322924	0.0294118
Malignant	18	48593373	C	A	.	c.1140-16C>A	SMAD4	splice_region_variant&intron_variant	.	.	4	875.5	0.006506	0.00102755	0.0294118
Malignant	21	10910396	G	T	p.Leu454Ile	c.1360C>A	TPTE	missense_variant	1	1	4	733	0.00828773	0.00370764	0.0294118
Malignant	1	27101082	T	G	p.Phe1455Cys	c.4364T>G	ARID1A	missense_variant	.	.	3	2448.33	0.00665626	0.00184563	0.0220588
Malignant	1	97981395	T	C	p.Ile543Val	c.1627A>G	DPYD	missense_variant	2	0	3	792	0.0725838	0.0941593	0.0220588
Malignant	1	157805716	A	C	p.Ser95Arg	c.285T>G	CD5L	missense_variant	1	0	3	2340.33	0.0058419	0.00103766	0.0220588
Malignant	1	158612297	T	G	p.Glu1547Asp	c.4641A>C	SPTA1	missense_variant	1	0	3	1232.33	0.00703809	0.00140066	0.0220588
Malignant	1	158637761	T	G	p.Lys642Thr	c.1925A>C	SPTA1	missense_variant	1	0	3	985.333	0.00811989	0.00300874	0.0220588
Malignant	1	181731740	G	T	p.Asp1546Tyr	c.4636G>T	CACNA1E	missense_variant	2	0	3	695	0.00675273	0.00111993	0.0220588
Malignant	1	182827849	T	G	.	c.901-19T>G	DHX9	splice_region_variant&intron_variant	.	.	3	1163.33	0.00625884	0.00105577	0.0220588
Malignant	1	237586384	T	C	p.?	c.849-8T>C	RYR2	splice_region_variant&intron_variant	2	0	3	1481	0.0115546	0.00632133	0.0220588
Malignant	1	237664189	C	G	p.Phe794Leu	c.2382C>G	RYR2	missense_variant	1	0	3	668.667	0.0109253	0.00462907	0.0220588
Malignant	1	237670098	G	T	p.Gly901Val	c.2702G>T	RYR2	missense_variant	1	0	3	673	0.00742761	0.00242953	0.0220588
Malignant	1	237693718	G	T	.	c.2823-9G>T	RYR2	splice_region_variant&intron_variant	.	.	3	739.667	0.00760267	0.00050676	0.0220588
Malignant	1	237944861	T	C	.	c.11881-4T>C	RYR2	splice_region_variant&intron_variant	.	.	3	585.667	0.0056785	0.000618152	0.0220588
Malignant	1	237949312	C	A	p.Thr4435Asn	c.13304C>A	RYR2	missense_variant	1	0	3	818.333	0.00723203	0.00128213	0.0220588
Malignant	1	237951330	G	T	p.Lys4457Asn	c.13371G>T	RYR2	missense_variant	.	.	3	865.667	0.00757713	0.00156829	0.0220588
Malignant	1	237965234	T	A	.	c.14151+18T>A	RYR2	splice_region_variant&intron_variant	.	.	3	1062.67	0.00611808	0.000560825	0.0220588
Malignant	2	30143126	T	G	p.Lys134Gln	c.400A>C	ALK	missense_variant	.	.	3	3006.67	0.00574579	0.00064273	0.0220588
Malignant	2	51254909	T	G	p.Lys168Thr	c.503A>C	NRXN1	missense_variant	.	.	3	7092	0.00588343	0.000926605	0.0220588
Malignant	2	141283569	G	T	.	c.7877-7C>A	LRP1B	splice_region_variant&intron_variant	.	.	3	849.667	0.00670932	0.000762581	0.0220588
Malignant	2	141457803	G	T	.	c.6799+16C>A	LRP1B	splice_region_variant&intron_variant	.	.	3	688	0.00535335	0.000118043	0.0220588
Malignant	2	141458040	C	A	p.Gly2193Val	c.6578G>T	LRP1B	missense_variant	2	1	3	830.333	0.00915687	0.00188288	0.0220588
Malignant	2	141458041	C	A	p.Gly2193*	c.6577G>T	LRP1B	stop_gained	1	1	3	737	0.00683192	0.000357273	0.0220588
Malignant	2	141459273	C	T	.	c.6427+17G>A	LRP1B	splice_region_variant&intron_variant	.	.	3	2427.33	0.00601192	0.000535398	0.0220588
Malignant	2	141571270	G	T	p.Ser1772*	c.5315C>A	LRP1B	stop_gained	1	0	3	641.667	0.00692965	0.00156081	0.0220588
Malignant	2	141609221	C	A	p.Glu1571*	c.4711G>T	LRP1B	stop_gained&splice_region_variant	1	1	3	757.667	0.00600952	0.000894818	0.0220588
Malignant	2	141625694	C	A	p.Glu1436Asp	c.4308G>T	LRP1B	missense_variant	3	1	3	721.667	0.00747676	0.00148824	0.0220588
Malignant	2	141625714	G	T	p.Leu1430Ile	c.4288C>A	LRP1B	missense_variant	1	0	3	720	0.00784244	0.00145254	0.0220588
Malignant	2	141819691	G	T	p.Leu389Ile	c.1165C>A	LRP1B	missense_variant	1	0	3	1048	0.00655212	0.000696178	0.0220588
Malignant	2	167297930	C	A	p.Met711Ile	c.2133G>T	SCN7A	missense_variant	1	1	3	812	0.00801921	0.00335296	0.0220588
Malignant	2	178095695	T	G	p.Asn546His	c.1636A>C	NFE2L2	missense_variant	1	0	3	1070.67	0.00613184	0.000727499	0.0220588
Malignant	2	178098944	C	A	p.Arg34Leu	c.101G>T	NFE2L2	missense_variant	3	3	3	1710	0.00670615	0.00114977	0.0220588
Malignant	2	178098969	G	T	p.Gln26Lys	c.76C>A	NFE2L2	missense_variant	4	0	3	1624	0.00750781	0.00120769	0.0220588
Malignant	2	179666876	A	C	p.Leu95Arg	c.284T>G	TTN	missense_variant	1	0	3	1202	0.00716503	0.000513602	0.0220588
Malignant	2	212578349	G	T	p.Ser303Tyr	c.908C>A	ERBB4	missense_variant	4	1	3	993	0.00762582	0.00134684	0.0220588
Malignant	3	10183752	T	G	p.Val74Gly	c.221T>G	VHL	missense_variant	4	0	3	3008	0.00585654	0.000601509	0.0220588
Malignant	3	41266048	A	C	p.Glu15Asp	c.45A>C	CTNNB1	missense_variant	.	.	3	1189	0.00536373	0.000237324	0.0220588
Malignant	3	47098318	A	C	p.Ile2319Ser	c.6956T>G	SETD2	missense_variant	.	.	3	749.667	0.00616751	0.000445003	0.0220588
Malignant	3	47164385	C	A	p.Glu581*	c.1741G>T	SETD2	stop_gained	2	0	3	863.333	0.00913459	0.00328776	0.0220588
Malignant	3	47164402	C	A	p.Cys575Phe	c.1724G>T	SETD2	missense_variant	.	.	3	883	0.008761	0.0022405	0.0220588
Malignant	4	1808569	C	T	p.Arg730Trp	c.2188C>T	FGFR3	missense_variant	1	0	3	1005	0.009193	0.00303032	0.0220588
Malignant	5	170837509	ATTTCT	A	.	c.847-18_847-14delCTTTT	NPM1	splice_region_variant&intron_variant	.	.	3	1116.67	0.0781855	0.0272277	0.0220588
Malignant	6	70916586	T	G	.	c.3224-19T>G	COL19A1	splice_region_variant&intron_variant	.	.	3	882.333	0.0068077	0.00238178	0.0220588
Malignant	6	117631426	A	C	p.Asn2084Lys	c.6252T>G	ROS1	missense_variant	2	0	3	874.667	0.00705134	0.00227604	0.0220588
Malignant	6	117642498	T	G	p.Asn1901His	c.5701A>C	ROS1	missense_variant	1	0	3	1288.33	0.00546147	0.000239945	0.0220588
Malignant	6	117650526	C	A	p.Gly1778*	c.5332G>T	ROS1	stop_gained	1	0	3	935.333	0.00634225	0.000343706	0.0220588
Malignant	6	117679153	A	T	p.Val1223Asp	c.3668T>A	ROS1	missense_variant	.	.	3	1278.67	0.00679796	0.000887226	0.0220588
Malignant	7	11457087	T	G	p.Gln1176Pro	c.3527A>C	THSD7A	missense_variant	.	.	3	1392.33	0.00698855	0.000600491	0.0220588
Malignant	7	11582630	G	T	p.Pro523His	c.1568C>A	THSD7A	missense_variant	.	.	3	670	0.00658239	0.00185975	0.0220588
Malignant	7	116398507	G	T	p.?	c.2103-6G>T	MET	splice_region_variant&intron_variant	1	0	3	924.333	0.00754165	0.00324067	0.0220588
Malignant	7	140434587	A	G	.	c.2128-17T>C	BRAF	splice_region_variant&intron_variant	.	.	3	820	0.00659991	0.00112181	0.0220588
Malignant	7	151859266	C	A	p.Cys3799Phe	c.11396G>T	KMT2C	missense_variant	.	.	3	1040.67	0.00880467	0.00266801	0.0220588
Malignant	7	151859288	G	T	p.Gln3792Lys	c.11374C>A	KMT2C	missense_variant	2	0	3	1321.33	0.0864179	0.113105	0.0220588
Malignant	7	151874158	G	T	p.Pro2794Thr	c.8380C>A	KMT2C	missense_variant	.	.	3	1182.33	0.0078521	0.00304776	0.0220588
Malignant	7	151884392	G	T	p.Leu1655Ile	c.4963C>A	KMT2C	missense_variant	1	1	3	1090.33	0.00899772	0.00452974	0.0220588
Malignant	7	151970840	C	T	p.Ser321Asn	c.962G>A	KMT2C	missense_variant	2	0	3	10307.3	0.052401	0.00559326	0.0220588
Malignant	8	38279386	C	T	p.Gly368Glu	c.1103G>A	FGFR1	missense_variant	.	.	3	1146	0.00544633	0.000369691	0.0220588
Malignant	8	51363276	G	T	p.Arg117Ile	c.350G>T	SNTG1	missense_variant	1	1	3	1944.33	0.00638644	0.000989151	0.0220588
Malignant	8	51705255	G	T	p.Ala474Ser	c.1420G>T	SNTG1	missense_variant	1	0	3	1288	0.00632202	0.00142323	0.0220588
Malignant	8	113331166	C	A	p.Arg2420Ser	c.7260G>T	CSMD3	missense_variant	1	0	3	1182.67	0.0064026	0.000585335	0.0220588
Malignant	8	113662583	A	C	.	c.3005-5T>G	CSMD3	splice_region_variant&intron_variant	.	.	3	1254.33	0.152721	0.0941071	0.0220588
Malignant	9	79954428	A	T	.	c.6379-4A>T	VPS13A	splice_region_variant&intron_variant	.	.	3	1001.33	0.00675058	0.00124084	0.0220588
Malignant	9	79975555	G	T	p.Glu2737*	c.8209G>T	VPS13A	stop_gained&splice_region_variant	.	.	3	699.667	0.00563026	0.00031743	0.0220588
Malignant	9	79980394	G	T	p.Asp2744Tyr	c.8230G>T	VPS13A	missense_variant	2	0	3	781.333	0.0058862	0.000801909	0.0220588
Malignant	9	80020770	C	A	.	c.9276-10C>A	VPS13A	splice_region_variant&intron_variant	.	.	3	702.667	0.00625452	0.00119056	0.0220588
Malignant	10	43609979	T	G	p.Phe644Cys	c.1931T>G	RET	missense_variant	.	.	3	3327.33	0.00593473	0.00113155	0.0220588
Malignant	10	89711910	T	G	p.Tyr349*	c.1047T>G	PTEN	stop_gained	5	0	3	772.667	0.00637739	0.00114939	0.0220588
Malignant	11	1017526	G	C	p.Pro1759Ala	c.5275C>G	MUC6	missense_variant	2	0	3	12651.3	0.00567663	0.000425261	0.0220588
Malignant	11	1017579	C	T	p.Ser1741Asn	c.5222G>A	MUC6	missense_variant	.	.	3	10542.7	0.00811706	0.00198367	0.0220588
Malignant	11	1651727	G	T	p.Lys219Asn	c.657G>T	KRTAP5-5	missense_variant	.	.	3	3211.67	0.00594455	0.000687484	0.0220588
Malignant	12	43826390	C	A	.	c.2931+14G>T	ADAMTS20	splice_region_variant&intron_variant	.	.	3	1093.67	0.00815275	0.00226756	0.0220588
Malignant	12	43826590	T	A	p.Glu915Asp	c.2745A>T	ADAMTS20	missense_variant	.	.	3	856.667	0.00550714	0.00042896	0.0220588
Malignant	14	105246407	G	A	.	c.175+18C>T	AKT1	splice_region_variant&intron_variant	.	.	3	1411	0.016147	0.00647313	0.0220588
Malignant	15	66727356	T	G	.	c.81-9T>G	MAP2K1	splice_region_variant&intron_variant	.	.	3	760.667	0.00652097	0.00125578	0.0220588
Malignant	15	66774134	A	T	p.Ile204Phe	c.610A>T	MAP2K1	missense_variant	1	1	3	952.667	0.00523675	8.65949e-05	0.0220588
Malignant	17	7578169	A	C	.	c.672+8T>G	TP53	splice_region_variant&intron_variant	.	.	3	2064	0.00569609	0.000302895	0.0220588
Malignant	17	10426466	C	A	p.Asp1872Tyr	c.5614G>T	MYH2	missense_variant	1	0	3	672.333	0.00547864	0.000200806	0.0220588
Malignant	17	10431996	A	C	.	c.3744+11T>G	MYH2	splice_region_variant&intron_variant	.	.	3	1369.33	0.00671187	0.000809454	0.0220588
Malignant	17	29550457	T	C	.	c.1722-5T>C	NF1	splice_region_variant&intron_variant	.	.	3	712.333	0.00567228	0.000588594	0.0220588
Malignant	17	29557960	C	T	.	c.3197+17C>T	NF1	splice_region_variant&intron_variant	.	.	3	555.333	0.00657024	0.00152781	0.0220588
Malignant	17	29685511	G	T	p.Asp2662Tyr	c.7984G>T	NF1	missense_variant	1	0	3	899.333	0.00556686	0.000307604	0.0220588
Malignant	17	37864567	C	T	.	c.226-7C>T	ERBB2	splice_region_variant&intron_variant	.	.	3	1016.33	0.00622481	0.000176157	0.0220588
Malignant	17	37868715	C	T	.	c.1148+14C>T	ERBB2	splice_region_variant&intron_variant	.	.	3	1793	0.16242	0.10736	0.0220588
Malignant	18	48591803	T	G	p.Tyr322*	c.966T>G	SMAD4	stop_gained	1	0	3	1168.33	0.00930738	0.00508109	0.0220588
Malignant	18	48604678	A	G	p.Ile500Met	c.1500A>G	SMAD4	missense_variant	.	.	3	2081.67	0.00937149	0.00277266	0.0220588
Malignant	19	10602949	CG	C	p.?	c.640-12delC	KEAP1	splice_region_variant&intron_variant	1	1	3	898.333	0.161701	0.102388	0.0220588
Malignant	19	11136125	A	T	p.Asn1037Tyr	c.3109A>T	SMARCA4	missense_variant	1	0	3	1027.67	0.0057642	0.000679919	0.0220588
Malignant	21	10941902	C	A	.	c.795+6G>T	TPTE	splice_region_variant&intron_variant	.	.	3	815.667	0.0068406	0.00182104	0.0220588
Malignant	21	10944766	G	T	p.Asp156Glu	c.468C>A	TPTE	missense_variant	1	1	3	904.333	0.00699825	0.00157825	0.0220588
Malignant	21	10971298	T	G	p.Asn20Thr	c.59A>C	TPTE	missense_variant	.	.	3	2300.67	0.00873879	0.00295788	0.0220588
Malignant	X	29959760	C	G	p.?	c.1058-8C>G	IL1RAPL1	splice_region_variant&intron_variant	1	0	3	802.667	0.00766678	0.000745679	0.0220588
Malignant	1	27023040	A	G	p.Glu49Gly	c.146A>G	ARID1A	missense_variant	.	.	2	5604	0.00612145	0.000275398	0.0147059
Malignant	1	27102131	G	A	p.Trp1686*	c.5057G>A	ARID1A	stop_gained	1	0	2	856	0.006067	0.00072417	0.0147059
Malignant	1	27105558	C	A	p.Cys1723*	c.5169C>A	ARID1A	stop_gained	1	0	2	927	0.00675946	0.00168332	0.0147059
Malignant	1	27106696	T	C	p.Phe2103Leu	c.6307T>C	ARID1A	missense_variant	1	0	2	1349	0.00632418	0.000818676	0.0147059
Malignant	1	120459211	A	C	p.Leu2045Arg	c.6134T>G	NOTCH2	missense_variant	.	.	2	1522	0.00608839	0.000755061	0.0147059
Malignant	1	120460311	T	C	p.Asn2002Asp	c.6004A>G	NOTCH2	missense_variant	.	.	2	681.5	0.0051393	2.42108e-05	0.0147059
Malignant	1	120463019	G	T	p.Ala1771Asp	c.5312C>A	NOTCH2	missense_variant	.	.	2	915.5	0.0054203	0.000272297	0.0147059
Malignant	1	120471830	G	A	p.Leu1221Phe	c.3661C>T	NOTCH2	missense_variant	.	.	2	576.5	0.00685608	0.00130053	0.0147059
Malignant	1	120548095	C	T	p.Arg91Gln	c.272G>A	NOTCH2	missense_variant	.	.	2	2409.5	0.0434574	0.00422384	0.0147059
Malignant	1	157802979	C	T	.	c.1039+3G>A	CD5L	splice_region_variant&intron_variant	.	.	2	2086.5	0.0315698	0.0162582	0.0147059
Malignant	1	157804319	T	G	p.Lys199Thr	c.596A>C	CD5L	missense_variant	1	0	2	1848	0.00524877	0.000240418	0.0147059
Malignant	1	158583513	C	T	p.Gly2329Gly	c.6987G>A	SPTA1	splice_region_variant&synonymous_variant	1	1	2	962.5	0.00581455	0.000546772	0.0147059
Malignant	1	158583545	A	T	p.Phe2319Ile	c.6955T>A	SPTA1	missense_variant	.	.	2	949.5	0.00674189	0.00167433	0.0147059
Malignant	1	158583556	T	G	p.His2315Pro	c.6944A>C	SPTA1	missense_variant	.	.	2	1216	0.00572769	0.000351342	0.0147059
Malignant	1	158587858	G	A	.	c.6531-12C>T	SPTA1	splice_region_variant&intron_variant	.	.	2	1601.5	0.0248008	0.00659451	0.0147059
Malignant	1	158607982	C	A	p.Gly1677Val	c.5030G>T	SPTA1	missense_variant	1	1	2	1212.5	0.00537752	0.000157535	0.0147059
Malignant	1	158631158	T	C	p.Arg836Gly	c.2506A>G	SPTA1	missense_variant	.	.	2	1755.5	0.0126782	0.00136135	0.0147059
Malignant	1	158631176	T	G	p.Lys830Gln	c.2488A>C	SPTA1	missense_variant	1	0	2	784	0.00579848	0.000345915	0.0147059
Malignant	1	158632482	C	A	.	c.2464+10G>T	SPTA1	splice_region_variant&intron_variant	.	.	2	1443.5	0.0058976	0.000462821	0.0147059
Malignant	1	158632600	T	G	p.Lys786Gln	c.2356A>C	SPTA1	missense_variant	1	0	2	1591	0.00594084	0.000677687	0.0147059
Malignant	1	158636234	C	A	p.Asp698Tyr	c.2092G>T	SPTA1	missense_variant	3	0	2	879	0.0109243	0.00276099	0.0147059
Malignant	1	158637663	C	A	p.Ala675Ser	c.2023G>T	SPTA1	missense_variant	1	0	2	681.5	0.00603084	0.000986704	0.0147059
Malignant	1	158637768	T	G	p.Ile640Leu	c.1918A>C	SPTA1	missense_variant	1	0	2	834	0.00595904	0.000220158	0.0147059
Malignant	1	158639233	T	G	p.Lys600Gln	c.1798A>C	SPTA1	missense_variant	.	.	2	990	0.0056468	0.000189775	0.0147059
Malignant	1	158644141	G	T	p.Ala443Asp	c.1328C>A	SPTA1	missense_variant	.	.	2	860.5	0.00738382	0.00237757	0.0147059
Malignant	1	158653205	C	A	p.Glu116*	c.346G>T	SPTA1	stop_gained	1	0	2	833	0.00716772	0.000271172	0.0147059
Malignant	1	158654886	G	T	.	c.264+12C>A	SPTA1	splice_region_variant&intron_variant	.	.	2	742	0.00589808	0.000813332	0.0147059
Malignant	1	181620492	G	T	p.Ala324Ser	c.970G>T	CACNA1E	missense_variant	1	0	2	698	0.00644347	3.32138e-05	0.0147059
Malignant	1	181705433	A	C	p.Glu1095Asp	c.3285A>C	CACNA1E	missense_variant	1	0	2	1856	0.0110342	0.000606055	0.0147059
Malignant	1	181727971	A	C	p.Glu1524Asp	c.4572A>C	CACNA1E	missense_variant	1	0	2	1074	0.0084278	0.00205838	0.0147059
Malignant	1	181750558	A	G	.	c.5268-5A>G	CACNA1E	splice_region_variant&intron_variant	.	.	2	1029	0.00533445	0.000190414	0.0147059
Malignant	1	181753847	G	T	p.Ala1841Ser	c.5521G>T	CACNA1E	missense_variant	1	0	2	947	0.00693909	0.00103358	0.0147059
Malignant	1	181767597	A	G	p.Glu2190Gly	c.6569A>G	CACNA1E	missense_variant	.	.	2	1342	0.00516796	0.000117454	0.0147059
Malignant	1	182812462	G	T	p.Gly49*	c.145G>T	DHX9	stop_gained	1	0	2	627	0.00555813	0.000238976	0.0147059
Malignant	1	182812472	C	A	p.Thr52Asn	c.155C>A	DHX9	missense_variant	1	0	2	645.5	0.00871671	0.0029112	0.0147059
Malignant	1	182823195	G	T	p.Ala170Ser	c.508G>T	DHX9	missense_variant	1	0	2	604.5	0.0057606	0.000460243	0.0147059
Malignant	1	182841460	G	T	.	c.1558-12G>T	DHX9	splice_region_variant&intron_variant	.	.	2	1234	0.00662781	0.000345688	0.0147059
Malignant	1	182849709	T	G	p.Phe864Val	c.2590T>G	DHX9	missense_variant	1	1	2	759.5	0.00596751	0.000272744	0.0147059
Malignant	1	182850641	C	A	.	c.2787-14C>A	DHX9	splice_region_variant&intron_variant	.	.	2	1442	0.00580236	0.000401817	0.0147059
Malignant	1	190067152	C	A	p.Ser766Ile	c.2297G>T	FAM5C	missense_variant	1	1	2	763.5	0.00627877	0.00116804	0.0147059
Malignant	1	237550571	C	T	.	c.577-10C>T	RYR2	splice_region_variant&intron_variant	.	.	2	999	0.0076955	0.00147881	0.0147059
Malignant	1	237580351	C	A	p.Thr259Asn	c.776C>A	RYR2	missense_variant	.	.	2	563	0.00882904	0.00146256	0.0147059
Malignant	1	237580365	G	T	p.Gly264Cys	c.790G>T	RYR2	missense_variant	1	1	2	534.5	0.00740908	0.00150357	0.0147059
Malignant	1	237604770	C	A	p.Ser386Tyr	c.1157C>A	RYR2	missense_variant	1	0	2	998	0.00603752	0.000135324	0.0147059
Malignant	1	237608750	G	T	p.Arg407Ile	c.1220G>T	RYR2	missense_variant	.	.	2	817.5	0.00558115	0.000415856	0.0147059
Malignant	1	237617784	C	A	p.Tyr462*	c.1386C>A	RYR2	stop_gained	.	.	2	862.5	0.0126455	0.00346185	0.0147059
Malignant	1	237617790	C	A	p.His464Gln	c.1392C>A	RYR2	missense_variant	.	.	2	881.5	0.00641373	0.00137848	0.0147059
Malignant	1	237780674	A	C	p.Lys1935Thr	c.5804A>C	RYR2	missense_variant	1	0	2	2267	0.00551333	2.00535e-06	0.0147059
Malignant	1	237787075	T	G	p.Leu1976Arg	c.5927T>G	RYR2	missense_variant	1	0	2	619	0.00742519	0.00155147	0.0147059
Malignant	1	237791158	C	T	p.Ser2073Phe	c.6218C>T	RYR2	missense_variant	3	0	2	1685.5	0.00679726	0.000291075	0.0147059
Malignant	1	237796959	G	T	p.Ala2213Ser	c.6637G>T	RYR2	missense_variant	2	0	2	795.5	0.00755353	0.000289607	0.0147059
Malignant	1	237813372	G	T	p.Glu2570*	c.7708G>T	RYR2	stop_gained	1	0	2	708	0.00762527	0.00123549	0.0147059
Malignant	1	237824144	C	A	p.Ser2778Tyr	c.8333C>A	RYR2	missense_variant	1	0	2	717.5	0.010976	0.00276969	0.0147059
Malignant	1	237863541	G	T	p.Lys3047Asn	c.9141G>T	RYR2	missense_variant	1	1	2	681	0.00642096	0.00121263	0.0147059
Malignant	1	237872213	C	A	p.Phe3319Leu	c.9957C>A	RYR2	missense_variant	1	0	2	826.5	0.00706654	0.00152637	0.0147059
Malignant	1	237886495	C	A	p.Thr3541Asn	c.10622C>A	RYR2	missense_variant	.	.	2	835	0.00533467	0.000180033	0.0147059
Malignant	1	237934152	G	A	p.Arg3841Gln	c.11522G>A	RYR2	missense_variant	.	.	2	2167.5	0.00553754	0.000475412	0.0147059
Malignant	1	237946964	T	C	.	c.11963-11T>C	RYR2	splice_region_variant&intron_variant	.	.	2	849	0.0121347	0.00677282	0.0147059
Malignant	1	237954780	G	T	p.Ala4510Ser	c.13528G>T	RYR2	missense_variant	.	.	2	655.5	0.00702483	0.00150759	0.0147059
Malignant	1	237957309	A	C	.	c.13913+12A>C	RYR2	splice_region_variant&intron_variant	.	.	2	672	0.236285	0.00216264	0.0147059
Malignant	1	237961424	G	A	p.Ala4682Thr	c.14044G>A	RYR2	missense_variant	3	0	2	1029.5	0.00576346	0.000215612	0.0147059
Malignant	2	29416224	A	C	p.Phe1577Val	c.4729T>G	ALK	missense_variant	.	.	2	2779	0.00801741	0.000661468	0.0147059
Malignant	2	29416399	C	A	p.Lys1518Asn	c.4554G>T	ALK	missense_variant	.	.	2	1976	0.0083974	0.00313424	0.0147059
Malignant	2	29443622	T	G	p.Met1199Leu	c.3595A>C	ALK	missense_variant	.	.	2	3576.5	0.0125514	0.00158997	0.0147059
Malignant	2	29443697	A	C	p.Phe1174Val	c.3520T>G	ALK	missense_variant	7	1	2	3673.5	0.0061905	0.000842908	0.0147059
Malignant	2	29451795	C	T	p.Gly924Ser	c.2770G>A	ALK	missense_variant	.	.	2	654.5	0.00691312	0.000255335	0.0147059
Malignant	2	29451806	C	A	p.Gly920Val	c.2759G>T	ALK	missense_variant	.	.	2	666	0.00594182	0.000323843	0.0147059
Malignant	2	50318467	G	C	p.Pro1278Ala	c.3832C>G	NRXN1	missense_variant	1	1	2	2244	0.00623275	0.000115108	0.0147059
Malignant	2	50463913	C	A	.	c.3666+14G>T	NRXN1	splice_region_variant&intron_variant	.	.	2	1022.5	0.00997252	0.00348503	0.0147059
Malignant	2	50724843	G	T	p.Ala876Glu	c.2627C>A	NRXN1	missense_variant	.	.	2	972	0.00684606	0.000816775	0.0147059
Malignant	2	50733768	C	A	.	c.2495-13G>T	NRXN1	splice_region_variant&intron_variant	.	.	2	1119.5	0.00622547	0.00061799	0.0147059
Malignant	2	69177399	G	T	.	c.67-4C>A	GKN2	splice_region_variant&intron_variant	.	.	2	643.5	0.00625006	0.000461349	0.0147059
Malignant	2	80646561	G	T	.	c.1138-13G>T	CTNNA2	splice_region_variant&intron_variant	.	.	2	952.5	0.00738492	0.00178939	0.0147059
Malignant	2	80846232	C	A	p.Thr818Asn	c.2453C>A	CTNNA2	missense_variant	1	0	2	1303	0.00735304	0.00223468	0.0147059
Malignant	2	80846235	C	A	p.Thr819Asn	c.2456C>A	CTNNA2	missense_variant	.	.	2	1285.5	0.00947035	0.00288707	0.0147059
Malignant	2	116447312	C	A	p.Thr181Asn	c.542C>A	DPP10	missense_variant	1	1	2	574	0.00784126	0.000884741	0.0147059
Malignant	2	116503681	C	A	p.Thr308Lys	c.923C>A	DPP10	missense_variant	.	.	2	586	0.00511959	2.62095e-05	0.0147059
Malignant	2	116534850	G	T	p.Ala447Ser	c.1339G>T	DPP10	missense_variant	.	.	2	605.5	0.00753648	0.00139209	0.0147059
Malignant	2	116548755	G	T	p.Glu561*	c.1681G>T	DPP10	stop_gained&splice_region_variant	1	1	2	536	0.00653528	0.000969414	0.0147059
Malignant	2	116572369	G	T	p.Met584Ile	c.1752G>T	DPP10	missense_variant	.	.	2	586.5	0.00680473	0.00164122	0.0147059
Malignant	2	116594106	C	A	p.Leu709Ile	c.2125C>A	DPP10	missense_variant	1	0	2	722.5	0.00554379	0.000203336	0.0147059
Malignant	2	140995756	G	T	p.Leu4509Ile	c.13525C>A	LRP1B	missense_variant	1	0	2	1027	0.00899543	0.00329336	0.0147059
Malignant	2	141108424	C	A	p.Gly3945Val	c.11834G>T	LRP1B	missense_variant	2	2	2	586	0.005989	0.000955444	0.0147059
Malignant	2	141108484	C	A	p.Gly3925Val	c.11774G>T	LRP1B	missense_variant	1	1	2	1043	0.00842517	0.00299408	0.0147059
Malignant	2	141116480	A	C	p.Cys3723Gly	c.11167T>G	LRP1B	missense_variant	.	.	2	2212	0.00849525	0.00211227	0.0147059
Malignant	2	141128794	G	T	p.Ser3610Tyr	c.10829C>A	LRP1B	missense_variant	2	0	2	747.5	0.00604753	0.000192724	0.0147059
Malignant	2	141245266	C	A	p.Glu3055*	c.9163G>T	LRP1B	stop_gained	1	0	2	793.5	0.00657243	0.00122484	0.0147059
Malignant	2	141283535	T	G	p.Lys2635Thr	c.7904A>C	LRP1B	missense_variant	1	0	2	785	0.0124397	0.00175591	0.0147059
Malignant	2	141283572	G	T	.	c.7877-10C>A	LRP1B	splice_region_variant&intron_variant	.	.	2	753	0.0102938	0.00155058	0.0147059
Malignant	2	141294133	C	A	.	c.7642+17G>T	LRP1B	splice_region_variant&intron_variant	.	.	2	625.5	0.0072258	0.000222994	0.0147059
Malignant	2	141294155	T	A	p.Tyr2546Phe	c.7637A>T	LRP1B	missense_variant	1	1	2	668.5	0.00526857	0.000185977	0.0147059
Malignant	2	141457936	C	A	p.Ala2228Ser	c.6682G>T	LRP1B	missense_variant	1	0	2	719	0.00833359	0.00261931	0.0147059
Malignant	2	141457977	G	T	p.Pro2214Gln	c.6641C>A	LRP1B	missense_variant	1	0	2	722	0.00775504	0.00197469	0.0147059
Malignant	2	141474237	G	T	.	c.5893+14C>A	LRP1B	splice_region_variant&intron_variant	.	.	2	595	0.00661599	0.000824485	0.0147059
Malignant	2	141474391	G	A	p.?	c.5759-6C>T	LRP1B	splice_region_variant&intron_variant	1	0	2	1184	0.00589364	0.000685307	0.0147059
Malignant	2	141598619	C	A	p.Arg1661Leu	c.4982G>T	LRP1B	missense_variant	1	1	2	651	0.00691839	5.02546e-05	0.0147059
Malignant	2	141625689	C	A	p.Arg1438Met	c.4313G>T	LRP1B	missense_variant	1	0	2	716.5	0.00906625	2.46589e-05	0.0147059
Malignant	2	141641475	T	G	p.Glu1360Asp	c.4080A>C	LRP1B	missense_variant	1	0	2	1045	0.00614442	0.000941502	0.0147059
Malignant	2	141709419	T	G	p.?	c.2968+10A>C	LRP1B	splice_region_variant&intron_variant	2	0	2	1341.5	0.0133993	0.00607573	0.0147059
Malignant	2	141747223	T	G	p.Asn883Thr	c.2648A>C	LRP1B	missense_variant	1	0	2	657	0.00665381	0.00118933	0.0147059
Malignant	2	141771157	C	A	p.Gly783Val	c.2348G>T	LRP1B	missense_variant	1	1	2	611	0.00982824	0.00168492	0.0147059
Malignant	2	141773489	G	T	.	c.1971-5C>A	LRP1B	splice_region_variant&intron_variant	.	.	2	672.5	0.00519956	3.60455e-05	0.0147059
Malignant	2	141816518	G	T	p.His448Asn	c.1342C>A	LRP1B	missense_variant	.	.	2	1060.5	0.00522296	0.000124634	0.0147059
Malignant	2	141816621	A	G	p.Val413Val	c.1239T>C	LRP1B	splice_region_variant&synonymous_variant	1	1	2	551	0.237757	0.00406126	0.0147059
Malignant	2	141946009	C	A	p.Ala332Ser	c.994G>T	LRP1B	missense_variant	1	0	2	698.5	0.00977433	0.00252795	0.0147059
Malignant	2	167262236	C	A	p.Ala1635Ser	c.4903G>T	SCN7A	missense_variant	1	1	2	1137	0.00724242	0.000859437	0.0147059
Malignant	2	167262353	C	G	p.Val1596Leu	c.4786G>C	SCN7A	missense_variant	2	0	2	3039	0.0116499	0.00586747	0.0147059
Malignant	2	167262763	C	A	p.Gly1459Val	c.4376G>T	SCN7A	missense_variant	.	.	2	1130.5	0.00750733	6.84314e-05	0.0147059
Malignant	2	167269061	A	T	p.Asn1195Lys	c.3585T>A	SCN7A	missense_variant	.	.	2	556.5	0.00539966	0.000218315	0.0147059
Malignant	2	167288968	C	T	p.Ala818Thr	c.2452G>A	SCN7A	missense_variant	.	.	2	896	0.00562793	0.000202974	0.0147059
Malignant	2	167289058	C	A	p.Glu788*	c.2362G>T	SCN7A	stop_gained	2	0	2	854.5	0.00739312	0.00234262	0.0147059
Malignant	2	167313391	C	A	p.Glu427*	c.1279G>T	SCN7A	stop_gained	.	.	2	606.5	0.00574178	0.000355782	0.0147059
Malignant	2	167313472	C	A	p.Glu400*	c.1198G>T	SCN7A	stop_gained	.	.	2	522.5	0.00574807	0.000192519	0.0147059
Malignant	2	167333988	G	T	p.Tyr73*	c.219C>A	SCN7A	stop_gained	.	.	2	601	0.0058346	7.09115e-05	0.0147059
Malignant	2	178095655	G	T	p.Thr559Asn	c.1676C>A	NFE2L2	missense_variant	.	.	2	744.5	0.00680657	0.000361888	0.0147059
Malignant	2	178098970	C	G	p.Arg25Ser	c.75G>C	NFE2L2	missense_variant	.	.	2	1986	0.00585902	0.000165073	0.0147059
Malignant	2	179667008	A	C	p.Leu51Arg	c.152T>G	TTN	missense_variant	.	.	2	2344.5	0.00877804	0.000451312	0.0147059
Malignant	3	10188204	T	G	p.Leu116Arg	c.347T>G	VHL	missense_variant	.	.	2	1269	0.00598311	0.000492376	0.0147059
Malignant	3	47103643	G	T	.	c.6293+10C>A	SETD2	splice_region_variant&intron_variant	.	.	2	557.5	0.00722256	0.00196862	0.0147059
Malignant	3	47143042	T	A	p.Thr1641Ser	c.4921A>T	SETD2	missense_variant	3	0	2	565.5	0.00697514	0.00119479	0.0147059
Malignant	3	47161694	C	A	p.Glu1478*	c.4432G>T	SETD2	stop_gained	2	0	2	636	0.00688415	0.000908056	0.0147059
Malignant	3	47161718	G	T	p.Pro1470Thr	c.4408C>A	SETD2	missense_variant	1	0	2	723	0.00894602	0.00380022	0.0147059
Malignant	3	47161946	C	A	p.Glu1394*	c.4180G>T	SETD2	stop_gained	1	0	2	1042.5	0.00729769	0.00114113	0.0147059
Malignant	3	47162783	C	A	p.Glu1115*	c.3343G>T	SETD2	stop_gained	1	0	2	1173	0.00889849	0.00188095	0.0147059
Malignant	3	47163278	G	T	p.Arg950Ser	c.2848C>A	SETD2	missense_variant	.	.	2	1040	0.00715398	0.00105021	0.0147059
Malignant	3	47164351	G	T	p.Thr592Lys	c.1775C>A	SETD2	missense_variant	1	0	2	843.5	0.00594006	0.000271123	0.0147059
Malignant	3	47205398	G	A	p.Pro6Leu	c.17C>T	SETD2	missense_variant	.	.	2	3824	0.00555449	0.000127324	0.0147059
Malignant	3	178919080	C	A	p.Gln189Lys	c.565C>A	PIK3CA	missense_variant	.	.	2	711.5	0.00630823	0.000210672	0.0147059
Malignant	3	178927977	C	A	p.His419Asn	c.1255C>A	PIK3CA	missense_variant	1	0	2	988	0.00563554	0.000144806	0.0147059
Malignant	3	178928067	C	A	p.Pro449Thr	c.1345C>A	PIK3CA	missense_variant	4	0	2	917	0.00549333	0.000473253	0.0147059
Malignant	3	178928098	T	G	p.Ile459Ser	c.1376T>G	PIK3CA	missense_variant	1	0	2	884	0.00848225	0.00168724	0.0147059
Malignant	3	178928141	G	T	.	c.1404+15G>T	PIK3CA	splice_region_variant&intron_variant	.	.	2	744	0.00696239	0.000789549	0.0147059
Malignant	3	178928303	A	T	p.Asn497Tyr	c.1489A>T	PIK3CA	missense_variant	1	0	2	1728	0.00695398	0.000257555	0.0147059
Malignant	3	178937438	C	A	p.Pro609His	c.1826C>A	PIK3CA	missense_variant	1	0	2	595	0.00836217	0.00144175	0.0147059
Malignant	3	178941862	T	A	.	c.2188-7T>A	PIK3CA	splice_region_variant&intron_variant	.	.	2	754	0.00540906	0.000338066	0.0147059
Malignant	3	178947041	C	A	.	c.2496-19C>A	PIK3CA	splice_region_variant&intron_variant	.	.	2	540	0.00555556	0	0.0147059
Malignant	3	178951903	G	T	p.Lys986Asn	c.2958G>T	PIK3CA	missense_variant	3	0	2	931.5	0.00921418	0.00299749	0.0147059
Malignant	3	181430218	A	C	p.Asn24His	c.70A>C	SOX2	missense_variant	.	.	2	6328.5	0.00768273	0.0020698	0.0147059
Malignant	4	1803102	T	C	p.Tyr152His	c.454T>C	FGFR3	missense_variant	1	0	2	769.5	0.008716	0.00189006	0.0147059
Malignant	4	1803477	G	C	.	c.739+7G>C	FGFR3	splice_region_variant&intron_variant	.	.	2	1276.5	0.00560114	0.000508841	0.0147059
Malignant	4	1803571	C	A	p.Pro250Gln	c.749C>A	FGFR3	missense_variant	1	0	2	2603	0.00661194	0.00138007	0.0147059
Malignant	4	1806218	A	C	p.Lys415Gln	c.1243A>C	FGFR3	missense_variant	.	.	2	1134	0.00669728	0.000916933	0.0147059
Malignant	4	1807467	G	A	.	c.1652-10G>A	FGFR3	splice_region_variant&intron_variant	.	.	2	771.5	0.0064634	9.39751e-05	0.0147059
Malignant	4	1807890	A	C	p.Lys652Thr	c.1955A>C	FGFR3	missense_variant	4	0	2	3433.5	0.00546278	0.000125891	0.0147059
Malignant	4	55152090	G	A	p.Arg841Lys	c.2522G>A	PDGFRA	missense_variant	.	.	2	1307	0.00570276	0.000218296	0.0147059
Malignant	4	55593414	C	A	p.Pro524His	c.1571C>A	KIT	missense_variant	1	1	2	841.5	0.0101338	0.00035116	0.0147059
Malignant	4	55593610	T	G	p.Val559Gly	c.1676T>G	KIT	missense_variant	14	0	2	1112.5	0.00919981	0.00139341	0.0147059
Malignant	4	55593648	G	T	p.Asp572Tyr	c.1714G>T	KIT	missense_variant	2	1	2	1147	0.00941607	0.00157294	0.0147059
Malignant	4	153244194	C	A	p.Glu655*	c.1963G>T	FBXW7_NM_018315_2	stop_gained	3	2	2	1343	0.00608703	0.000829401	0.0147059
Malignant	4	153244221	C	A	p.Val646Leu	c.1936G>T	FBXW7_NM_018315_2	missense_variant	1	0	2	1002	0.00786359	0.00121907	0.0147059
Malignant	4	153247138	G	T	.	c.1644+20C>A	FBXW7	splice_region_variant&intron_variant	.	.	2	551	0.00545588	0.000247544	0.0147059
Malignant	5	19747052	C	A	p.Met174Ile	c.522G>T	CDH18	missense_variant&splice_region_variant	1	0	2	582	0.00862741	0.00352537	0.0147059
Malignant	5	19838885	G	T	p.Pro71Thr	c.211C>A	CDH18	missense_variant	2	0	2	710.5	0.0063417	0.000770672	0.0147059
Malignant	5	45267191	C	A	p.Gly595*	c.1783G>T	HCN1	stop_gained	1	0	2	1002.5	0.00597232	8.30409e-05	0.0147059
Malignant	5	112174668	G	T	p.Ser1126Ile	c.3377G>T	APC	missense_variant	.	.	2	942.5	0.00632323	0.000427007	0.0147059
Malignant	5	112175540	A	C	p.Ile1417Leu	c.4249A>C	APC	missense_variant	.	.	2	1914.5	0.00594085	0.00083881	0.0147059
Malignant	5	170837509	ATTTC	A	.	c.847-18_847-15delCTTT	NPM1	splice_region_variant&intron_variant	.	.	2	1306.5	0.211676	0.00574889	0.0147059
Malignant	6	70637868	G	A	p.Ala112Thr	c.334G>A	COL19A1	missense_variant	2	1	2	1160	0.00604279	0.000224	0.0147059
Malignant	6	70642670	C	A	p.?	c.667-5C>A	COL19A1	splice_region_variant&intron_variant	1	0	2	898	0.00687918	0.001849	0.0147059
Malignant	6	70861292	G	T	p.Ala681Ser	c.2041G>T	COL19A1	missense_variant	1	1	2	924.5	0.00541878	2.5867e-05	0.0147059
Malignant	6	70878079	C	A	p.Pro838His	c.2513C>A	COL19A1	missense_variant	.	.	2	572	0.0107269	0.00411537	0.0147059
Malignant	6	70900066	G	T	p.Glu1025Asp	c.3075G>T	COL19A1	missense_variant	1	1	2	1469.5	0.00585472	0.000162124	0.0147059
Malignant	6	117609866	G	T	p.Ala2278Asp	c.6833C>A	ROS1	missense_variant	.	.	2	1058.5	0.00752825	0.000485997	0.0147059
Malignant	6	117631244	C	A	p.Trp2145Leu	c.6434G>T	ROS1	missense_variant&splice_region_variant	2	0	2	864	0.0080973	3.27826e-05	0.0147059
Malignant	6	117632183	C	A	p.Arg2078Met	c.6233G>T	ROS1	missense_variant&splice_region_variant	.	.	2	892.5	0.00616154	0.000549869	0.0147059
Malignant	6	117641146	C	A	p.Arg1942Leu	c.5825G>T	ROS1	missense_variant	1	1	2	1021.5	0.00628249	0.000555115	0.0147059
Malignant	6	117647368	G	T	.	c.5557+19C>A	ROS1	splice_region_variant&intron_variant	.	.	2	1713.5	0.00528647	0.000223175	0.0147059
Malignant	6	117650522	C	A	p.Cys1779Phe	c.5336G>T	ROS1	missense_variant	1	0	2	870.5	0.00645786	0.00132088	0.0147059
Malignant	6	117650532	C	A	p.Asp1776Tyr	c.5326G>T	ROS1	missense_variant	1	1	2	795.5	0.00623974	0.000296206	0.0147059
Malignant	6	117650568	C	A	p.Gly1764Trp	c.5290G>T	ROS1	missense_variant	1	1	2	1043.5	0.00708322	0.000362793	0.0147059
Malignant	6	117662381	C	A	p.Val1666Phe	c.4996G>T	ROS1	missense_variant	.	.	2	759.5	0.00737271	0.00209102	0.0147059
Malignant	6	117665282	C	A	p.Val1489Phe	c.4465G>T	ROS1	missense_variant	1	1	2	727.5	0.0117275	0.00265306	0.0147059
Malignant	6	117665288	A	C	p.Tyr1487Asp	c.4459T>G	ROS1	missense_variant	1	0	2	855	0.0069781	0.00084313	0.0147059
Malignant	6	117678974	G	T	p.Leu1283Ile	c.3847C>A	ROS1	missense_variant	.	.	2	570.5	0.00887306	0.00376232	0.0147059
Malignant	6	117687286	C	A	p.Arg922Ile	c.2765G>T	ROS1	missense_variant	.	.	2	665	0.00530006	0.000204523	0.0147059
Malignant	6	117718186	G	T	p.Pro224His	c.671C>A	ROS1	missense_variant	.	.	2	858	0.0052919	0.000286898	0.0147059
Malignant	6	117725443	C	A	p.Lys146Asn	c.438G>T	ROS1	missense_variant&splice_region_variant	1	0	2	713.5	0.00836766	0.00107903	0.0147059
Malignant	6	117739687	G	A	.	c.124-18C>T	ROS1	splice_region_variant&intron_variant	.	.	2	729.5	0.00696356	0.000873428	0.0147059
Malignant	6	133804237	C	A	p.Ala398Glu	c.1193C>A	EYA4	missense_variant	1	1	2	764	0.00647908	0.000588061	0.0147059
Malignant	6	133833923	C	A	.	c.1358+6C>A	EYA4	splice_region_variant&intron_variant	.	.	2	720	0.00558582	0.000411179	0.0147059
Malignant	6	133836471	C	T	p.Pro511Leu	c.1532C>T	EYA4	missense_variant	.	.	2	1252.5	0.0055642	0.000249758	0.0147059
Malignant	6	152786384	C	A	.	c.1932+9G>T	SYNE1	splice_region_variant&intron_variant	.	.	2	838.5	0.00655436	6.08543e-05	0.0147059
Malignant	6	152786400	G	T	p.Ala642Asp	c.1925C>A	SYNE1	missense_variant	1	0	2	863	0.00690398	0.00060675	0.0147059
Malignant	7	11415519	C	A	.	c.4890-14G>T	THSD7A	splice_region_variant&intron_variant	.	.	2	782.5	0.00709869	0.000454176	0.0147059
Malignant	7	11632862	C	A	.	c.1271+19G>T	THSD7A	splice_region_variant&intron_variant	.	.	2	1017	0.00574771	0.000677997	0.0147059
Malignant	7	11675776	C	A	p.Gly335Trp	c.1003G>T	THSD7A	missense_variant	.	.	2	1298.5	0.00539487	0.000147492	0.0147059
Malignant	7	31887623	C	A	p.Glu373Asp	c.1119G>T	PDE1C	missense_variant	1	0	2	688	0.00573183	0.000487075	0.0147059
Malignant	7	31904618	A	T	p.Leu290Ile	c.868T>A	PDE1C	missense_variant	1	0	2	1070.5	0.00515529	0.00014694	0.0147059
Malignant	7	55209982	G	T	p.Cys31Phe	c.92G>T	EGFR	missense_variant	1	0	2	777	0.010861	0.00124558	0.0147059
Malignant	7	55240708	T	G	p.Val651Gly	c.1952T>G	EGFR	missense_variant	.	.	2	1513	0.00598819	8.71451e-05	0.0147059
Malignant	7	55242409	T	C	p.?	c.2185-6T>C	EGFR	splice_region_variant&intron_variant	1	0	2	665.5	0.00528979	0.000174696	0.0147059
Malignant	7	55269034	C	A	p.Leu1034Ile	c.3100C>A	EGFR	missense_variant	.	.	2	2212	0.00558723	0.000300891	0.0147059
Malignant	7	116422039	C	T	.	c.3577-3C>T	MET	splice_region_variant&intron_variant	.	.	2	621.5	0.0083126	0.00149132	0.0147059
Malignant	7	116435930	T	G	.	c.3990-11T>G	MET	splice_region_variant&intron_variant	.	.	2	1803.5	0.00971854	0.00271154	0.0147059
Malignant	7	134225824	T	A	p.Phe312Ile	c.934T>A	AKR1B10	missense_variant	.	.	2	980	0.00510294	6.7692e-05	0.0147059
Malignant	7	140434575	AAAAAAAAAAAG	A	.	c.2128-16_2128-6delCTTTTTTTTTT	BRAF	splice_region_variant&intron_variant	.	.	2	1894	0.00609499	0.000795972	0.0147059
Malignant	7	140453170	T	G	p.Thr589Pro	c.1765A>C	BRAF	missense_variant	.	.	2	720	0.00738045	0.00179386	0.0147059
Malignant	7	140454008	G	T	p.His574Asn	c.1720C>A	BRAF	missense_variant	1	1	2	584.5	0.00513458	0.000101023	0.0147059
Malignant	7	140508732	G	T	p.Leu190Ile	c.568C>A	BRAF	missense_variant	2	0	2	534.5	0.00760501	0.00227641	0.0147059
Malignant	7	140549916	G	T	p.Leu79Met	c.235C>A	BRAF	missense_variant	1	0	2	707	0.00628228	0.000282276	0.0147059
Malignant	7	140550031	G	T	.	c.139-19C>A	BRAF	splice_region_variant&intron_variant	.	.	2	782	0.0076306	0.0018391	0.0147059
Malignant	7	140624432	C	G	p.Glu24Asp	c.72G>C	BRAF	missense_variant	.	.	2	3235.5	0.00606845	0.0008044	0.0147059
Malignant	7	151859226	C	A	p.Glu3812Asp	c.11436G>T	KMT2C	missense_variant	1	0	2	779.5	0.0090981	0.00171803	0.0147059
Malignant	7	151859613	T	G	p.Lys3683Asn	c.11049A>C	KMT2C	missense_variant	1	0	2	2396.5	0.0100501	0.00167017	0.0147059
Malignant	7	151859850	C	A	p.Lys3604Asn	c.10812G>T	KMT2C	missense_variant	1	0	2	1500	0.00630357	0.000967393	0.0147059
Malignant	7	151860472	T	G	p.Glu3397Ala	c.10190A>C	KMT2C	missense_variant	.	.	2	2418.5	0.00920393	0.00122218	0.0147059
Malignant	7	151864297	C	A	p.Glu3228Asp	c.9684G>T	KMT2C	missense_variant	.	.	2	713	0.00886138	0.00198853	0.0147059
Malignant	7	151874046	G	T	p.Ser2831Tyr	c.8492C>A	KMT2C	missense_variant	1	0	2	1409	0.00684212	0.000450492	0.0147059
Malignant	7	151874065	C	A	p.Glu2825*	c.8473G>T	KMT2C	stop_gained	1	1	2	1326.5	0.00832525	0.00158801	0.0147059
Malignant	7	151874251	C	A	p.Glu2763*	c.8287G>T	KMT2C	stop_gained	1	0	2	1069	0.00680842	0.00133111	0.0147059
Malignant	7	151884372	G	T	p.Phe1661Leu	c.4983C>A	KMT2C	missense_variant	.	.	2	742.5	0.00745598	0.00218589	0.0147059
Malignant	7	151891358	T	A	.	c.4508-12A>T	KMT2C	splice_region_variant&intron_variant	.	.	2	1516.5	0.00561081	0.000409253	0.0147059
Malignant	7	151891359	A	T	.	c.4508-13T>A	KMT2C	splice_region_variant&intron_variant	.	.	2	764	0.0052356	0	0.0147059
Malignant	7	151902226	C	A	p.Gly1309Val	c.3926G>T	KMT2C	missense_variant	.	.	2	690	0.00878085	0.00305347	0.0147059
Malignant	7	151917624	T	A	p.Glu1232Asp	c.3696A>T	KMT2C	missense_variant	2	0	2	852.5	0.00788037	0.00254988	0.0147059
Malignant	7	151932946	T	C	p.Arg909Gly	c.2725A>G	KMT2C	missense_variant	1	0	2	3230	0.0136799	0.00129705	0.0147059
Malignant	7	151935811	G	A	p.Ala878Val	c.2633C>T	KMT2C	missense_variant	.	.	2	3017.5	0.0209164	0.0143329	0.0147059
Malignant	7	151944987	C	A	p.Gln844His	c.2532G>T	KMT2C	missense_variant	.	.	2	1513.5	0.00526039	0.000110177	0.0147059
Malignant	7	151949650	G	T	p.His484Asn	c.1450C>A	KMT2C	missense_variant	1	0	2	629	0.00563602	0.000352004	0.0147059
Malignant	7	151970795	T	C	p.Glu336Gly	c.1007A>G	KMT2C	missense_variant	1	0	2	8325	0.0545801	0.0124327	0.0147059
Malignant	7	152055703	C	A	p.Glu73Asp	c.219G>T	KMT2C	missense_variant	1	0	2	1208	0.00584958	0.000566557	0.0147059
Malignant	8	38273416	C	T	p.Arg640Gln	c.1919G>A	FGFR1	missense_variant	1	0	2	903	0.00716645	0.00151034	0.0147059
Malignant	8	38273582	C	A	.	c.1757-4G>T	FGFR1	splice_region_variant&intron_variant	.	.	2	877.5	0.0056865	6.06237e-05	0.0147059
Malignant	8	38274934	G	A	p.Ser549Leu	c.1646C>T	FGFR1	missense_variant	1	1	2	607.5	0.00574	0.000194716	0.0147059
Malignant	8	38275887	G	A	p.Ser461Phe	c.1382C>T	FGFR1	missense_variant	1	0	2	1085.5	0.00558496	0.000269845	0.0147059
Malignant	8	38315065	A	C	.	c.12-13T>G	FGFR1	splice_region_variant&intron_variant	.	.	2	601	0.00581139	0.000735251	0.0147059
Malignant	8	51314780	G	T	p.Gly13Val	c.38G>T	SNTG1	missense_variant	2	1	2	729.5	0.00827652	0.00311301	0.0147059
Malignant	8	51314842	G	T	p.Asp34Tyr	c.100G>T	SNTG1	missense_variant	2	1	2	941.5	0.00748821	0.00184305	0.0147059
Malignant	8	113241006	C	A	p.Gly3648Val	c.10943G>T	CSMD3	missense_variant	1	1	2	800.5	0.0084965	0.0015035	0.0147059
Malignant	8	113246640	G	T	p.Ala3565Asp	c.10694C>A	CSMD3	missense_variant	1	1	2	725	0.005496	9.05934e-05	0.0147059
Malignant	8	113253997	C	A	p.Val3474Leu	c.10420G>T	CSMD3	missense_variant	1	1	2	1157	0.00576485	0.000477344	0.0147059
Malignant	8	113277687	G	T	p.Thr3214Asn	c.9641C>A	CSMD3	missense_variant	1	0	2	1273	0.00581199	0.000775621	0.0147059
Malignant	8	113301774	T	A	.	c.8975-7A>T	CSMD3	splice_region_variant&intron_variant	.	.	2	620	0.0076535	0.00218902	0.0147059
Malignant	8	113304949	T	C	.	c.8615-10A>G	CSMD3	splice_region_variant&intron_variant	.	.	2	1023.5	0.00550399	0.000387029	0.0147059
Malignant	8	113326149	C	A	p.Arg2561Leu	c.7682G>T	CSMD3	missense_variant	1	1	2	598	0.0065843	0.000736346	0.0147059
Malignant	8	113326668	C	A	p.Gln2513His	c.7539G>T	CSMD3	missense_variant	1	1	2	671	0.00668565	0.000376499	0.0147059
Malignant	8	113348960	T	C	p.Arg2314Gly	c.6940A>G	CSMD3	missense_variant	4	0	2	1622.5	0.00552214	7.74903e-05	0.0147059
Malignant	8	113402954	G	T	p.Pro1958His	c.5873C>A	CSMD3	missense_variant	1	0	2	717	0.00551361	0.000341194	0.0147059
Malignant	8	113529263	C	A	p.Ala1586Ser	c.4756G>T	CSMD3	missense_variant&splice_region_variant	2	0	2	705	0.00966379	0.00352882	0.0147059
Malignant	8	113529278	G	T	p.Pro1581Thr	c.4741C>A	CSMD3	missense_variant	1	1	2	707.5	0.0082704	0.000903915	0.0147059
Malignant	8	113529283	G	T	p.Pro1579His	c.4736C>A	CSMD3	missense_variant	1	1	2	740	0.00592634	0.000681587	0.0147059
Malignant	8	113529331	T	A	p.Glu1563Val	c.4688A>T	CSMD3	missense_variant	1	0	2	1606	0.00554849	0.000340159	0.0147059
Malignant	8	113650949	C	A	p.Glu1168*	c.3502G>T	CSMD3	stop_gained	1	0	2	603	0.00815972	0.00295139	0.0147059
Malignant	8	113650967	C	A	p.Asp1162Tyr	c.3484G>T	CSMD3	missense_variant	1	0	2	649	0.00924976	0.00309592	0.0147059
Malignant	8	113662479	C	A	p.Ser1035Ile	c.3104G>T	CSMD3	missense_variant	1	0	2	799	0.00700692	0.00181661	0.0147059
Malignant	8	113662529	A	C	p.His1018Gln	c.3054T>G	CSMD3	missense_variant	.	.	2	1106	0.00922603	0.00323801	0.0147059
Malignant	8	113678499	G	T	.	c.2816+7C>A	CSMD3	splice_region_variant&intron_variant	.	.	2	974.5	0.00771865	0.00158368	0.0147059
Malignant	8	113871367	C	A	p.?	c.1755+7G>T	CSMD3	splice_region_variant&intron_variant	1	1	2	653.5	0.00612169	7.02566e-05	0.0147059
Malignant	8	113966905	A	G	.	c.1420+8T>C	CSMD3	splice_region_variant&intron_variant	.	.	2	1064	0.00517888	8.98227e-05	0.0147059
Malignant	8	114185976	C	A	p.Trp228Cys	c.684G>T	CSMD3	missense_variant	1	0	2	1102.5	0.00590121	6.30081e-05	0.0147059
Malignant	8	114186003	T	C	p.Ile219Met	c.657A>G	CSMD3	missense_variant	3	0	2	1394	0.216919	0.0191846	0.0147059
Malignant	8	114290857	C	A	p.Ala160Ser	c.478G>T	CSMD3	missense_variant	.	.	2	622	0.00645496	0.000394355	0.0147059
Malignant	8	114326864	C	A	p.Glu113*	c.337G>T	CSMD3	stop_gained	1	0	2	795	0.00567099	8.44018e-05	0.0147059
Malignant	8	139151240	C	A	p.Ser1297Ile	c.3890G>T	FAM135B	missense_variant	1	1	2	824	0.00613322	0.000632675	0.0147059
Malignant	8	139165273	G	A	p.Pro482Leu	c.1445C>T	LOC51059	missense_variant	2	1	2	1441	0.231466	0.0106758	0.0147059
Malignant	8	139190923	T	G	p.Asn295Thr	c.884A>C	FAM135B	missense_variant	.	.	2	1243	0.0059885	0.000908056	0.0147059
Malignant	8	139255324	T	G	.	c.543-13A>C	FAM135B	splice_region_variant&intron_variant	.	.	2	1246.5	0.00840992	0.00109879	0.0147059
Malignant	8	139380193	C	A	p.Val12Leu	c.34G>T	LOC51059	missense_variant	1	0	2	665.5	0.00810873	0.00104159	0.0147059
Malignant	9	79814852	CT	C	.	c.101-3delT	VPS13A	splice_region_variant&intron_variant	.	.	2	564.5	0.00531538	7.06206e-05	0.0147059
Malignant	9	79843078	C	A	p.Ser498Tyr	c.1493C>A	VPS13A	missense_variant	1	0	2	1022	0.00582978	0.000487905	0.0147059
Malignant	9	79891020	C	A	p.Leu903Ile	c.2707C>A	VPS13A	missense_variant	.	.	2	701.5	0.0073053	0.000631213	0.0147059
Malignant	9	79917836	G	T	p.Arg1273Leu	c.3818G>T	VPS13A	missense_variant	.	.	2	533	0.00849908	0.00130484	0.0147059
Malignant	9	79933197	T	A	p.Leu1668Gln	c.5003T>A	VPS13A	missense_variant	1	0	2	580.5	0.00700918	0.000911616	0.0147059
Malignant	9	79934478	C	A	.	c.5314-10C>A	VPS13A	splice_region_variant&intron_variant	.	.	2	881.5	0.0083319	0.00326604	0.0147059
Malignant	9	79936597	C	A	p.Thr1922Asn	c.5765C>A	VPS13A	missense_variant	.	.	2	707	0.00639004	0.000887979	0.0147059
Malignant	9	79952162	C	A	.	c.6096-9C>A	VPS13A	splice_region_variant&intron_variant	.	.	2	718	0.00558061	3.73701e-05	0.0147059
Malignant	9	79952468	A	T	.	c.6378+15A>T	VPS13A	splice_region_variant&intron_variant	.	.	2	1696	0.24458	0.00316498	0.0147059
Malignant	9	79954489	G	T	p.Ala2146Ser	c.6436G>T	VPS13A	missense_variant	1	0	2	893.5	0.00805277	0.00223882	0.0147059
Malignant	9	79954821	C	A	p.Asn2256Lys	c.6768C>A	VPS13A	missense_variant	.	.	2	927	0.00691298	0.00174503	0.0147059
Malignant	9	79955388	G	T	p.Met2316Ile	c.6948G>T	VPS13A	missense_variant	.	.	2	528.5	0.00568585	0.000231307	0.0147059
Malignant	9	79966327	T	G	p.Cys2462Gly	c.7384T>G	VPS13A	missense_variant	.	.	2	1045.5	0.00658458	0.00138708	0.0147059
Malignant	9	79971640	G	T	p.Val2555Phe	c.7663G>T	VPS13A	missense_variant	.	.	2	947	0.00884931	0.00142969	0.0147059
Malignant	9	79996923	C	T	p.Arg3037*	c.9109C>T	VPS13A	stop_gained	.	.	2	586.5	0.00682231	0.000122138	0.0147059
Malignant	9	80020874	C	A	p.His3124Asn	c.9370C>A	VPS13A	missense_variant	.	.	2	761.5	0.00525297	3.10419e-05	0.0147059
Malignant	9	139393452	C	T	.	c.6083-4G>A	NOTCH1	splice_region_variant&intron_variant	.	.	2	656.5	0.00707503	0.000924969	0.0147059
Malignant	9	139413928	T	G	p.Thr278Pro	c.832A>C	NOTCH1	missense_variant	.	.	2	2098.5	0.0054549	0.00012946	0.0147059
Malignant	10	43610033	A	C	p.Lys662Thr	c.1985A>C	RET	missense_variant	2	0	2	4810.5	0.0058544	0.000316787	0.0147059
Malignant	10	89653803	C	A	p.Ala207Asp	c.620C>A	PTEN	missense_variant	1	0	2	909	0.00551289	0.000260786	0.0147059
Malignant	10	89692799	C	A	p.Pro268Thr	c.802C>A	PTEN	missense_variant	.	.	2	720	0.00854568	0.00332375	0.0147059
Malignant	10	89692835	G	T	p.Asp280Tyr	c.838G>T	PTEN	missense_variant	7	0	2	784.5	0.00774818	0.00172408	0.0147059
Malignant	10	89692955	A	T	p.Lys320*	c.958A>T	PTEN	stop_gained	2	0	2	622.5	0.00566435	0.000229564	0.0147059
Malignant	10	89711882	C	A	p.Thr340Asn	c.1019C>A	PTEN	missense_variant	.	.	2	671	0.00714721	0.00127637	0.0147059
Malignant	10	89711902	T	G	p.Tyr347Asp	c.1039T>G	PTEN	missense_variant	6	0	2	685.5	0.00679995	0.000951992	0.0147059
Malignant	10	89717613	C	A	p.Pro386His	c.1157C>A	PTEN	missense_variant	1	0	2	692.5	0.00811078	0.00261628	0.0147059
Malignant	10	89717639	G	T	p.Val395Leu	c.1183G>T	PTEN	missense_variant	.	.	2	704	0.00630396	0.000303965	0.0147059
Malignant	10	89720726	G	T	p.Gly466*	c.1396G>T	PTEN	stop_gained	4	1	2	547.5	0.00637195	0.000732849	0.0147059
Malignant	10	123274852	G	A	.	c.1088-19C>T	FGFR2	splice_region_variant&intron_variant	.	.	2	1083.5	0.00653903	0.00131027	0.0147059
Malignant	11	532724	C	T	p.Arg161His	c.482G>A	HRAS	missense_variant	1	0	2	1033	0.0072391	6.55004e-05	0.0147059
Malignant	11	1016773	G	T	p.Pro2010Thr	c.6028C>A	MUC6	missense_variant	.	.	2	23968	0.012354	0.00303485	0.0147059
Malignant	11	1016787	A	T	p.Leu2005His	c.6014T>A	MUC6	missense_variant	.	.	2	24803.5	0.00952895	0.00218695	0.0147059
Malignant	11	1016839	A	G	p.Ser1988Pro	c.5962T>C	MUC6	missense_variant	.	.	2	18658.5	0.0318276	0.00411017	0.0147059
Malignant	11	1016944	G	T	p.His1953Asn	c.5857C>A	MUC6	missense_variant	.	.	2	17300.5	0.00588479	0.000562104	0.0147059
Malignant	11	1016959	T	A	p.Arg1948*	c.5842A>T	MUC6	stop_gained	.	.	2	22955.5	0.00860001	0.00279065	0.0147059
Malignant	11	1017022	G	A	p.His1927Tyr	c.5779C>T	MUC6	missense_variant	.	.	2	20268.5	0.00622354	0.00058134	0.0147059
Malignant	11	1017447	G	T	p.Thr1785Asn	c.5354C>A	MUC6	missense_variant	.	.	2	14925	0.0501023	0.00130367	0.0147059
Malignant	11	1017484	G	A	p.His1773Tyr	c.5317C>T	MUC6	missense_variant	.	.	2	18772.5	0.006724	0.00152715	0.0147059
Malignant	11	1017486	T	G	p.Asn1772Thr	c.5315A>C	MUC6	missense_variant	.	.	2	15610	0.00663352	0.00096691	0.0147059
Malignant	11	1017520	C	T	p.Val1761Ile	c.5281G>A	MUC6	missense_variant	.	.	2	17738	0.00820146	0.00265648	0.0147059
Malignant	11	1017544	T	C	p.Thr1753Ala	c.5257A>G	MUC6	missense_variant	.	.	2	16860.5	0.0184942	0.00339861	0.0147059
Malignant	11	1017545	G	T	p.His1752Gln	c.5256C>A	MUC6	missense_variant	.	.	2	16847	0.00752006	0.00160138	0.0147059
Malignant	11	1017591	C	T	p.Arg1737Gln	c.5210G>A	MUC6	missense_variant	2	0	2	11675	0.00835571	0.00130613	0.0147059
Malignant	11	1017592	G	A	p.Arg1737*	c.5209C>T	MUC6	stop_gained	1	0	2	11674.5	0.00780141	0.000636263	0.0147059
Malignant	11	1017648	G	T	p.Pro1718His	c.5153C>A	MUC6	missense_variant	.	.	2	8728	0.0137524	0.00829106	0.0147059
Malignant	11	1651182	T	C	p.Cys38Arg	c.112T>C	KRTAP5-5	missense_variant	2	0	2	1839	0.033554	0.0028522	0.0147059
Malignant	11	1651212	T	C	p.Cys48Arg	c.142T>C	KRTAP5-5	missense_variant	.	.	2	1780	0.0149905	0.00203078	0.0147059
Malignant	11	1651423	G	C	p.Gly118Ala	c.353G>C	KRTAP5-5	missense_variant	2	1	2	951	0.0865192	0.0200985	0.0147059
Malignant	11	1651459	G	T	p.Gly130Val	c.389G>T	KRTAP5-5	missense_variant	5	0	2	930	0.00727438	0.000738436	0.0147059
Malignant	11	1651684	T	A	p.Phe205Tyr	c.614T>A	KRTAP5-5	missense_variant	1	0	2	947.5	0.00560556	0.000529414	0.0147059
Malignant	11	20623023	C	G	p.Leu118Val	c.352C>G	SLC6A5	missense_variant	.	.	2	3966.5	0.00609973	0.000611683	0.0147059
Malignant	11	108172459	G	T	p.Lys1754Asn	c.5262G>T	ATM	missense_variant	.	.	2	843.5	0.00706433	0.000670472	0.0147059
Malignant	11	119148947	G	T	p.Lys389Asn	c.1167G>T	CBL	missense_variant	1	0	2	801.5	0.00669801	0.0012385	0.0147059
Malignant	11	119149229	G	T	p.Gly413Cys	c.1237G>T	CBL	missense_variant	.	.	2	644.5	0.00995726	0.000882849	0.0147059
Malignant	11	119155826	T	G	.	c.1563+16T>G	CBL	splice_region_variant&intron_variant	.	.	2	1692	0.0116569	0.00328873	0.0147059
Malignant	12	25380168	C	A	p.Arg97Ile	c.290G>T	KRAS	missense_variant&splice_region_variant	2	0	2	1090	0.00762594	0.00118817	0.0147059
Malignant	12	25380184	C	A	p.Asp92Tyr	c.274G>T	KRAS	missense_variant	2	0	2	844.5	0.00775741	0.000450522	0.0147059
Malignant	12	43792876	C	A	p.Trp1482Leu	c.4445G>T	ADAMTS20	missense_variant	.	.	2	745	0.00841561	0.00330314	0.0147059
Malignant	12	43821093	G	T	.	c.4107+18C>A	ADAMTS20	splice_region_variant&intron_variant	.	.	2	1103	0.00752071	0.00194302	0.0147059
Malignant	12	43822340	C	A	.	c.3655-6G>T	ADAMTS20	splice_region_variant&intron_variant	.	.	2	1608.5	0.0054302	0.000321646	0.0147059
Malignant	12	43826520	C	A	p.Gly939*	c.2815G>T	ADAMTS20	stop_gained	1	1	2	918.5	0.00609707	0.000587425	0.0147059
Malignant	12	43884251	G	T	.	c.1077-13C>A	ADAMTS20	splice_region_variant&intron_variant	.	.	2	1009	0.00570597	0.000673617	0.0147059
Malignant	12	43896134	C	A	p.Glu230*	c.688G>T	ADAMTS20	stop_gained	.	.	2	686	0.00511274	6.86055e-05	0.0147059
Malignant	13	28610183	A	G	p.?	c.1310-3T>C	FLT3	splice_region_variant&intron_variant	81	0	2	839.5	0.210046	0.0254309	0.0147059
Malignant	13	48878136	G	C	p.Glu30Gln	c.88G>C	RB1	missense_variant	.	.	2	1255.5	0.00845702	0.000260294	0.0147059
Malignant	13	48878157	A	C	p.Ser37Arg	c.109A>C	RB1	missense_variant	.	.	2	1616.5	0.00525388	0.000125676	0.0147059
Malignant	13	48923119	G	T	p.Leu189Phe	c.567G>T	RB1	missense_variant	1	0	2	778.5	0.00514068	0.000115558	0.0147059
Malignant	13	48934173	G	T	p.Asp210Tyr	c.628G>T	RB1	missense_variant	.	.	2	615	0.00566264	0.000472329	0.0147059
Malignant	13	48934189	C	A	p.Ser215*	c.644C>A	RB1	stop_gained	2	0	2	1152.5	0.00595713	0.000626635	0.0147059
Malignant	13	49027147	C	A	p.Leu572Ile	c.1714C>A	RB1	missense_variant	1	0	2	1328.5	0.00609682	0.00025911	0.0147059
Malignant	13	49039456	A	C	p.Lys814Thr	c.2441A>C	RB1	missense_variant	1	0	2	570	0.00526965	0.0001849	0.0147059
Malignant	14	105238686	C	T	.	c.1260+16G>A	AKT1	splice_region_variant&intron_variant	.	.	2	564.5	0.00891679	0.00203211	0.0147059
Malignant	15	66782910	G	A	p.Gly380Asp	c.1139G>A	MAP2K1	missense_variant	.	.	2	633.5	0.00558548	0.000308432	0.0147059
Malignant	17	7576836	G	T	.	c.993+17C>A	TP53	splice_region_variant&intron_variant	.	.	2	1391	0.00545554	0.000436718	0.0147059
Malignant	17	7576917	T	G	p.Asn310Thr	c.929A>C	TP53	missense_variant	2	0	2	2984	0.00810664	0.000502079	0.0147059
Malignant	17	7577593	T	A	p.Thr230Ser	c.688A>T	TP53	missense_variant	2	0	2	840	0.00852794	0.00290997	0.0147059
Malignant	17	10426880	C	A	p.Arg1802Leu	c.5405G>T	MYH2	missense_variant	1	0	2	2642.5	0.00697037	0.00193482	0.0147059
Malignant	17	10428375	A	C	p.Leu1557Arg	c.4670T>G	MYH2	missense_variant	1	0	2	2211.5	0.00657549	0.00153453	0.0147059
Malignant	17	10432311	C	T	p.Arg1147Gln	c.3440G>A	MYH2	missense_variant	.	.	2	3146.5	0.00603576	0.000253552	0.0147059
Malignant	17	10432332	T	G	p.Lys1140Thr	c.3419A>C	MYH2	missense_variant	.	.	2	2560.5	0.00543967	6.69373e-05	0.0147059
Malignant	17	10432772	C	A	p.Lys1048Asn	c.3144G>T	MYH2	missense_variant	2	0	2	1590	0.00990893	0.00102004	0.0147059
Malignant	17	10432777	C	A	p.Glu1047*	c.3139G>T	MYH2	stop_gained	1	0	2	1603	0.0100969	0.00354193	0.0147059
Malignant	17	10432871	C	A	.	c.3117+10G>T	MYH2	splice_region_variant&intron_variant	.	.	2	1333	0.00578523	0.00037007	0.0147059
Malignant	17	10436640	G	T	p.Phe801Leu	c.2403C>A	MYH2	missense_variant	1	0	2	1116	0.00783391	0.00134742	0.0147059
Malignant	17	10448734	C	G	p.Gly145Ala	c.434G>C	MYH2	missense_variant	1	0	2	1780	0.00644916	9.9956e-05	0.0147059
Malignant	17	10448836	G	T	.	c.349-17C>A	MYH2	splice_region_variant&intron_variant	.	.	2	1151.5	0.00752411	0.00187439	0.0147059
Malignant	17	10450902	T	G	p.Met80Leu	c.238A>C	MYH2	missense_variant	.	.	2	1975.5	0.00585196	0.000568582	0.0147059
Malignant	17	29556043	G	T	p.Ala804Ser	c.2410G>T	NF1	missense_variant	.	.	2	741.5	0.010227	0.00358988	0.0147059
Malignant	17	29556164	T	G	p.Leu844Arg	c.2531T>G	NF1	missense_variant	.	.	2	893.5	0.00717838	0.000726763	0.0147059
Malignant	17	29556861	G	T	p.Leu953Phe	c.2859G>T	NF1	missense_variant	.	.	2	584	0.00680983	0.00153742	0.0147059
Malignant	17	29557285	C	A	p.Arg1000Ser	c.2998C>A	NF1	missense_variant	1	0	2	939	0.00627116	0.000440253	0.0147059
Malignant	17	29559761	G	T	p.Val1120Phe	c.3358G>T	NF1	missense_variant	.	.	2	732	0.00627909	0.000629373	0.0147059
Malignant	17	29653005	G	T	p.Gly1668Val	c.5003G>T	NF1	missense_variant	1	1	2	794	0.00570259	0.000232129	0.0147059
Malignant	17	29653015	C	A	p.Tyr1671*	c.5013C>A	NF1	stop_gained	.	.	2	818.5	0.0103438	0.000271884	0.0147059
Malignant	17	29664828	CT	C	p.?	c.6643-3delT	NF1	splice_region_variant&intron_variant	1	0	2	760	0.00581317	0.000398009	0.0147059
Malignant	17	29665040	C	A	.	c.6705-3C>A	NF1	splice_region_variant&intron_variant	.	.	2	779.5	0.00635371	0.000479999	0.0147059
Malignant	17	37881664	TG	T	p.?	c.2725+15delG	ERBB2	splice_region_variant&intron_variant	1	0	2	790.5	0.00505988	8.53411e-07	0.0147059
Malignant	18	48593389	G	T	p.Arg380Ser	c.1140G>T	SMAD4	missense_variant	1	0	2	930.5	0.00603455	0.000375702	0.0147059
Malignant	18	48593510	G	A	p.Ala421Thr	c.1261G>A	SMAD4	missense_variant	1	0	2	827.5	0.00810805	0.000788746	0.0147059
Malignant	18	48593533	G	T	p.Lys428Asn	c.1284G>T	SMAD4	missense_variant	3	0	2	784.5	0.00587513	0.000639528	0.0147059
Malignant	18	48604736	G	T	p.Glu520*	c.1558G>T	SMAD4	stop_gained	6	0	2	1368	0.00607876	0.00104098	0.0147059
Malignant	19	1220410	A	G	p.His168Arg	c.503A>G	STK11	missense_variant	1	1	2	939	0.00885836	0.00109639	0.0147059
Malignant	19	1222974	G	A	p.?	c.921-10G>A	STK11	splice_region_variant&intron_variant	1	0	2	1654	0.0166254	0.0107331	0.0147059
Malignant	19	10610067	T	A	.	c.639+4A>T	KEAP1	splice_region_variant&intron_variant	.	.	2	3000.5	0.00621861	0.000771139	0.0147059
Malignant	19	10610111	T	G	p.His200Pro	c.599A>C	KEAP1	missense_variant	1	1	2	3849	0.00814641	0.00190788	0.0147059
Malignant	19	11121225	G	A	.	c.2274+18G>A	SMARCA4	splice_region_variant&intron_variant	.	.	2	1180.5	0.00675678	5.43663e-05	0.0147059
Malignant	19	11138502	T	G	p.Asp1086Glu	c.3258T>G	SMARCA4	missense_variant	1	1	2	1653	0.00543597	9.19473e-05	0.0147059
Malignant	19	11150240	T	C	.	c.4266+11T>C	SMARCA4	splice_region_variant&intron_variant	.	.	2	760	0.00582733	0.000332829	0.0147059
Malignant	19	11169536	G	A	p.Ala1568Thr	c.4702G>A	SMARCA4	missense_variant	2	0	2	818	0.00713799	0.00152002	0.0147059
Malignant	19	17945641	G	T	.	c.2199+20C>A	JAK3	splice_region_variant&intron_variant	.	.	2	2288.5	0.0087336	0.00197304	0.0147059
Malignant	19	56363740	G	A	.	c.280+14G>A	NLRP4	splice_region_variant&intron_variant	.	.	2	1180.5	0.00551091	5.49501e-05	0.0147059
Malignant	19	56369126	T	G	p.Phe123Val	c.367T>G	NLRP4	missense_variant	.	.	2	2053	0.00929289	0.00235586	0.0147059
Malignant	21	10907033	G	T	p.Leu510Ile	c.1528C>A	TPTE	missense_variant	1	1	2	1304	0.00717068	0.000646912	0.0147059
Malignant	21	10908822	T	C	.	c.1520+3A>G	TPTE	splice_region_variant&intron_variant	.	.	2	3223.5	0.146958	0.0176623	0.0147059
Malignant	21	10914428	G	T	p.Leu431Ile	c.1291C>A	TPTE	missense_variant	2	1	2	1100.5	0.00683593	0.000213414	0.0147059
Malignant	21	10920084	C	A	p.Gln390His	c.1170G>T	TPTE	missense_variant	1	1	2	1957.5	0.00589067	0.000873113	0.0147059
Malignant	21	10920104	C	A	p.Gly384*	c.1150G>T	TPTE	stop_gained	1	1	2	2017.5	0.00569772	0.000164519	0.0147059
Malignant	21	10933838	G	T	.	c.1027+14C>A	TPTE	splice_region_variant&intron_variant	.	.	2	1146	0.00681116	0.00158338	0.0147059
Malignant	21	10933919	C	A	p.Lys320Asn	c.960G>T	TPTE	missense_variant	1	1	2	1095	0.00620555	0.00108485	0.0147059
Malignant	21	10942976	C	A	p.Arg204Ile	c.611G>T	TPTE	missense_variant	1	0	2	1309.5	0.00536362	0.000110831	0.0147059
Malignant	21	10944778	C	A	p.Gln152His	c.456G>T	TPTE	missense_variant	1	0	2	901.5	0.00612991	0.000100622	0.0147059
Malignant	21	10951392	G	C	p.Thr107Ser	c.320C>G	TPTE	missense_variant	2	0	2	3652	0.13556	0.0142586	0.0147059
Malignant	X	29414363	G	T	.	c.363-12G>T	IL1RAPL1	splice_region_variant&intron_variant	.	.	2	566.5	0.00619106	0.000964577	0.0147059
Malignant	X	29686638	T	C	.	c.778+17T>C	IL1RAPL1	splice_region_variant&intron_variant	.	.	2	857.5	0.00760049	0.00183347	0.0147059
Malignant	X	91134258	G	A	p.Val1007Ile	c.3019G>A	PCDH11X	missense_variant	.	.	2	1875	0.00534855	0.000285256	0.0147059
Malignant	1	27023262	G	A	p.Gly123Asp	c.368G>A	ARID1A	missense_variant	.	.	1	931	0.0075188	0	0.00735294
Malignant	1	27023407	A	C	p.Gln171His	c.513A>C	ARID1A	missense_variant	.	.	1	10105	0.00504701	0	0.00735294
Malignant	1	27023410	A	C	p.Gln172His	c.516A>C	ARID1A	missense_variant	1	0	1	10038	0.00547918	0	0.00735294
Malignant	1	27023541	A	C	p.Tyr216Ser	c.647A>C	ARID1A	missense_variant	1	0	1	909	0.00660066	0	0.00735294
Malignant	1	27023692	C	A	p.Phe266Leu	c.798C>A	ARID1A	missense_variant	1	0	1	616	0.00649351	0	0.00735294
Malignant	1	27023700	A	C	p.Gln269Pro	c.806A>C	ARID1A	missense_variant	.	.	1	11087	0.0064039	0	0.00735294
Malignant	1	27056142	C	A	p.Pro380Thr	c.1138C>A	ARID1A	missense_variant	.	.	1	923	0.00975081	0	0.00735294
Malignant	1	27056189	T	A	p.Tyr395*	c.1185T>A	ARID1A	stop_gained	2	0	1	794	0.00503778	0	0.00735294
Malignant	1	27057646	C	T	p.Pro452Ser	c.1354C>T	ARID1A	missense_variant	1	0	1	592	0.00506757	0	0.00735294
Malignant	1	27057722	A	G	p.His477Arg	c.1430A>G	ARID1A	missense_variant	.	.	1	1856	0.00538793	0	0.00735294
Malignant	1	27057777	T	G	p.His495Gln	c.1485T>G	ARID1A	missense_variant	1	0	1	2356	0.00594228	0	0.00735294
Malignant	1	27059255	G	C	p.Ser631Thr	c.1892G>C	ARID1A	missense_variant	.	.	1	912	0.00548246	0	0.00735294
Malignant	1	27087389	G	T	p.Gly655*	c.1963G>T	ARID1A	stop_gained	3	1	1	1138	0.00527241	0	0.00735294
Malignant	1	27088680	T	G	p.Ser763Arg	c.2289T>G	ARID1A	missense_variant	.	.	1	942	0.00530786	0	0.00735294
Malignant	1	27092737	C	T	p.Gln920*	c.2758C>T	ARID1A	stop_gained	2	0	1	536	0.00559701	0	0.00735294
Malignant	1	27092956	G	A	p.Ala963Thr	c.2887G>A	ARID1A	missense_variant	.	.	1	618	0.00970874	0	0.00735294
Malignant	1	27094369	G	A	p.Arg1026His	c.3077G>A	ARID1A	missense_variant	.	.	1	678	0.00737463	0	0.00735294
Malignant	1	27094383	A	G	p.Thr1031Ala	c.3091A>G	ARID1A	missense_variant	1	1	1	793	0.00630517	0	0.00735294
Malignant	1	27094429	G	A	p.Arg1046Lys	c.3137G>A	ARID1A	missense_variant	4	0	1	945	0.00634921	0	0.00735294
Malignant	1	27094450	G	A	p.Arg1053His	c.3158G>A	ARID1A	missense_variant	1	0	1	793	0.00630517	0	0.00735294
Malignant	1	27099003	C	T	p.Ser1140Phe	c.3419C>T	ARID1A	missense_variant	.	.	1	622	0.00643087	0	0.00735294
Malignant	1	27099008	C	T	p.Gln1142*	c.3424C>T	ARID1A	stop_gained	9	0	1	535	0.00560748	0	0.00735294
Malignant	1	27099051	A	G	p.Glu1156Gly	c.3467A>G	ARID1A	missense_variant	2	0	1	1084	0.00553506	0	0.00735294
Malignant	1	27099396	T	A	p.Tyr1211*	c.3633T>A	ARID1A	stop_gained	1	0	1	1144	0.00699301	0	0.00735294
Malignant	1	27099864	C	A	p.Ser1248*	c.3743C>A	ARID1A	stop_gained	3	0	1	720	0.00555556	0	0.00735294
Malignant	1	27100063	T	G	.	c.3867-8T>G	ARID1A	splice_region_variant&intron_variant	.	.	1	3104	0.00869845	0	0.00735294
Malignant	1	27100387	C	T	p.Gln1367*	c.4099C>T	ARID1A	stop_gained	2	0	1	607	0.00658979	0	0.00735294
Malignant	1	27101130	A	C	p.Asn1471Thr	c.4412A>C	ARID1A	missense_variant	.	.	1	3958	0.00555836	0	0.00735294
Malignant	1	27101254	G	T	p.Gln1512His	c.4536G>T	ARID1A	missense_variant	1	1	1	706	0.00849858	0	0.00735294
Malignant	1	27101342	G	A	p.Glu1542Lys	c.4624G>A	ARID1A	missense_variant	1	0	1	630	0.00634921	0	0.00735294
Malignant	1	27101393	G	A	p.Ala1559Thr	c.4675G>A	ARID1A	missense_variant	.	.	1	713	0.00701262	0	0.00735294
Malignant	1	27101408	A	C	p.Met1564Leu	c.4690A>C	ARID1A	missense_variant	.	.	1	711	0.00843882	0	0.00735294
Malignant	1	27101453	C	T	p.Gln1579*	c.4735C>T	ARID1A	stop_gained	3	1	1	538	0.00743494	0	0.00735294
Malignant	1	27101511	G	A	p.Arg1598His	c.4793G>A	ARID1A	missense_variant	.	.	1	1426	0.0056101	0	0.00735294
Malignant	1	27101568	G	A	p.Gly1617Asp	c.4850G>A	ARID1A	missense_variant	.	.	1	1756	0.00569476	0	0.00735294
Malignant	1	27102085	C	T	p.Arg1671Trp	c.5011C>T	ARID1A	missense_variant	1	0	1	890	0.00674157	0	0.00735294
Malignant	1	27102137	T	G	p.Leu1688*	c.5063T>G	ARID1A	stop_gained	1	1	1	583	0.00686106	0	0.00735294
Malignant	1	27102214	T	G	.	c.5124+16T>G	ARID1A	splice_region_variant&intron_variant	.	.	1	764	0.0052356	0	0.00735294
Malignant	1	27105521	G	C	p.Gly1711Ala	c.5132G>C	ARID1A	missense_variant	1	0	1	505	0.00792079	0	0.00735294
Malignant	1	27105531	G	T	p.Glu1714Asp	c.5142G>T	ARID1A	missense_variant	1	0	1	733	0.00545703	0	0.00735294
Malignant	1	27105541	G	T	p.Glu1718*	c.5152G>T	ARID1A	stop_gained	2	0	1	1041	0.0067243	0	0.00735294
Malignant	1	27105635	G	A	p.Arg1749Lys	c.5246G>A	ARID1A	missense_variant	.	.	1	788	0.00507614	0	0.00735294
Malignant	1	27105745	G	A	p.Glu1786Lys	c.5356G>A	ARID1A	missense_variant	1	0	1	1169	0.00684346	0	0.00735294
Malignant	1	27105949	C	T	p.His1854Tyr	c.5560C>T	ARID1A	missense_variant	2	0	1	546	0.00549451	0	0.00735294
Malignant	1	27106159	G	A	p.Glu1924Lys	c.5770G>A	ARID1A	missense_variant	.	.	1	768	0.00520833	0	0.00735294
Malignant	1	27106376	G	A	p.Gly1996Asp	c.5987G>A	ARID1A	missense_variant	1	1	1	834	0.0059952	0	0.00735294
Malignant	1	27106987	G	A	p.Glu2200Lys	c.6598G>A	ARID1A	missense_variant	1	0	1	543	0.00552486	0	0.00735294
Malignant	1	27107083	C	T	p.Arg2232Trp	c.6694C>T	ARID1A	missense_variant	3	0	1	939	0.00532481	0	0.00735294
Malignant	1	27107164	T	G	p.Leu2259Val	c.6775T>G	ARID1A	missense_variant	.	.	1	538	0.00557621	0	0.00735294
Malignant	1	43814954	G	A	p.Ala497Thr	c.1489G>A	MPL	missense_variant	1	0	1	772	0.00647668	0	0.00735294
Malignant	1	43815048	C	A	.	c.1565+18C>A	MPL	splice_region_variant&intron_variant	.	.	1	858	0.00699301	0	0.00735294
Malignant	1	97547972	C	T	p.Val941Ile	c.2821G>A	DPYD	missense_variant	.	.	1	555	0.0108108	0	0.00735294
Malignant	1	97915596	G	T	.	c.1905+19C>A	DPYD	splice_region_variant&intron_variant	.	.	1	580	0.00517241	0	0.00735294
Malignant	1	97981371	C	A	p.Ala551Ser	c.1651G>T	DPYD	missense_variant	.	.	1	569	0.00527241	0	0.00735294
Malignant	1	115256524	C	A	p.Glu63*	c.187G>T	NRAS	stop_gained	1	0	1	1005	0.00597015	0	0.00735294
Malignant	1	115256530	G	T	p.Gln61Lys	c.181C>A	NRAS	missense_variant	1236	24	1	987	0.00607903	0	0.00735294
Malignant	1	115256535	G	T	p.Ala59Asp	c.176C>A	NRAS	missense_variant	5	0	1	952	0.00630252	0	0.00735294
Malignant	1	115256536	C	A	p.Ala59Ser	c.175G>T	NRAS	missense_variant	1	0	1	949	0.00842993	0	0.00735294
Malignant	1	115256571	T	G	p.Asp47Ala	c.140A>C	NRAS	missense_variant	.	.	1	749	0.00667557	0	0.00735294
Malignant	1	115256595	G	A	p.Ser39Phe	c.116C>T	NRAS	missense_variant	.	.	1	737	0.00949796	0	0.00735294
Malignant	1	120458153	C	G	p.Ala2398Pro	c.7192G>C	NOTCH2	missense_variant	.	.	1	898	0.00668151	0	0.00735294
Malignant	1	120458852	T	C	p.Thr2165Ala	c.6493A>G	NOTCH2	missense_variant	1	1	1	944	0.00529661	0	0.00735294
Malignant	1	120458964	C	A	p.Lys2127Asn	c.6381G>T	NOTCH2	missense_variant	1	0	1	1160	0.00517241	0	0.00735294
Malignant	1	120458966	T	A	p.Lys2127*	c.6379A>T	NOTCH2	stop_gained	1	0	1	1164	0.00515464	0	0.00735294
Malignant	1	120460394	G	T	.	c.5930-9C>A	NOTCH2	splice_region_variant&intron_variant	.	.	1	571	0.00525394	0	0.00735294
Malignant	1	120461130	T	C	p.Asp1943Gly	c.5828A>G	NOTCH2	missense_variant	1	0	1	729	0.00548697	0	0.00735294
Malignant	1	120461984	C	T	p.Arg1911His	c.5732G>A	NOTCH2	missense_variant	.	.	1	599	0.00500835	0	0.00735294
Malignant	1	120462957	G	A	p.Gln1792*	c.5374C>T	NOTCH2	stop_gained	1	0	1	1179	0.00593723	0	0.00735294
Malignant	1	120464329	A	C	.	c.5310+7T>G	NOTCH2	splice_region_variant&intron_variant	.	.	1	589	0.00509338	0	0.00735294
Malignant	1	120464910	G	A	p.Ala1721Val	c.5162C>T	NOTCH2	missense_variant	.	.	1	594	0.00505051	0	0.00735294
Malignant	1	120466369	G	A	p.Gln1584*	c.4750C>T	NOTCH2	stop_gained	1	1	1	529	0.0094518	0	0.00735294
Malignant	1	120466378	G	A	p.Arg1581Trp	c.4741C>T	NOTCH2	missense_variant	.	.	1	1088	0.00551471	0	0.00735294
Malignant	1	120469132	C	T	p.Arg1332His	c.3995G>A	NOTCH2	missense_variant	.	.	1	623	0.00642055	0	0.00735294
Malignant	1	120469160	T	C	p.Ser1323Gly	c.3967A>G	NOTCH2	missense_variant	.	.	1	673	0.00594354	0	0.00735294
Malignant	1	120471834	G	T	p.Gly1219Gly	c.3657C>A	NOTCH2	splice_region_variant&synonymous_variant	.	.	1	586	0.00511945	0	0.00735294
Malignant	1	120479966	G	A	p.Ala1154Val	c.3461C>T	NOTCH2	missense_variant	2	0	1	1151	0.00608167	0	0.00735294
Malignant	1	120479996	C	T	p.Ser1144Asn	c.3431G>A	NOTCH2	missense_variant	.	.	1	1357	0.00515844	0	0.00735294
Malignant	1	120480474	G	T	.	c.3337+6C>A	NOTCH2	splice_region_variant&intron_variant	.	.	1	673	0.00594354	0	0.00735294
Malignant	1	120480500	T	C	p.Asp1106Gly	c.3317A>G	NOTCH2	missense_variant	1	0	1	1486	0.00605653	0	0.00735294
Malignant	1	120483245	G	A	p.Thr1039Met	c.3116C>T	NOTCH2	missense_variant	1	0	1	1330	0.00526316	0	0.00735294
Malignant	1	120484374	G	A	p.Pro919Leu	c.2756C>T	NOTCH2	missense_variant	1	0	1	554	0.00722022	0	0.00735294
Malignant	1	120491020	C	T	.	c.2752+17G>A	NOTCH2	splice_region_variant&intron_variant	.	.	1	680	0.00588235	0	0.00735294
Malignant	1	120491039	G	A	p.Ala917Val	c.2750C>T	NOTCH2	missense_variant	1	0	1	1251	0.00559552	0	0.00735294
Malignant	1	120493427	G	A	p.Ala800Val	c.2399C>T	NOTCH2	missense_variant	1	0	1	639	0.00625978	0	0.00735294
Malignant	1	120497651	G	A	.	c.2219+12C>T	NOTCH2	splice_region_variant&intron_variant	.	.	1	605	0.00661157	0	0.00735294
Malignant	1	120497801	C	T	p.Gly694Asp	c.2081G>A	NOTCH2	missense_variant	.	.	1	925	0.00648649	0	0.00735294
Malignant	1	120506308	C	T	p.Ala602Thr	c.1804G>A	NOTCH2	missense_variant	.	.	1	1104	0.00634058	0	0.00735294
Malignant	1	120510037	T	G	.	c.1453+19A>C	NOTCH2	splice_region_variant&intron_variant	.	.	1	648	0.00617284	0	0.00735294
Malignant	1	120510775	C	A	p.Gly397Trp	c.1189G>T	NOTCH2	missense_variant	2	2	1	738	0.00542005	0	0.00735294
Malignant	1	120512170	C	T	p.Ala358Thr	c.1072G>A	NOTCH2	missense_variant	1	0	1	805	0.00745342	0	0.00735294
Malignant	1	120512226	A	G	p.Ile339Thr	c.1016T>C	NOTCH2	missense_variant	.	.	1	1201	0.0174854	0	0.00735294
Malignant	1	120529609	T	G	p.Asn283Thr	c.848A>C	NOTCH2	missense_variant	.	.	1	559	0.00536673	0	0.00735294
Malignant	1	120539691	G	T	p.Pro227His	c.680C>A	NOTCH2	missense_variant	3	0	1	2844	0.0059775	0	0.00735294
Malignant	1	120539742	G	A	p.Pro210Leu	c.629C>T	NOTCH2	missense_variant	.	.	1	948	0.0559072	0	0.00735294
Malignant	1	120539760	G	A	p.Ser204Phe	c.611C>T	NOTCH2	missense_variant	.	.	1	1768	0.0050905	0	0.00735294
Malignant	1	120539877	T	A	p.Gln165Leu	c.494A>T	NOTCH2	missense_variant	.	.	1	733	0.00545703	0	0.00735294
Malignant	1	120548168	G	T	p.Pro67Thr	c.199C>A	NOTCH2	missense_variant	1	0	1	2702	0.0466321	0	0.00735294
Malignant	1	157802987	C	T	p.Cys345Tyr	c.1034G>A	CD5L	missense_variant	1	1	1	1499	0.006004	0	0.00735294
Malignant	1	157803062	T	A	p.Gln320Leu	c.959A>T	CD5L	missense_variant	1	0	1	1419	0.00563777	0	0.00735294
Malignant	1	157803101	C	T	p.Arg307His	c.920G>A	CD5L	missense_variant	.	.	1	616	0.00649351	0	0.00735294
Malignant	1	157803246	C	A	p.Val259Leu	c.775G>T	CD5L	missense_variant	1	0	1	1040	0.00576923	0	0.00735294
Malignant	1	157805858	A	G	p.Val48Ala	c.143T>C	CD5L	missense_variant	.	.	1	1117	0.00537153	0	0.00735294
Malignant	1	157805859	C	T	p.Val48Met	c.142G>A	CD5L	missense_variant	2	1	1	1500	0.006	0	0.00735294
Malignant	1	157805909	T	G	p.His31Pro	c.92A>C	CD5L	missense_variant	.	.	1	728	0.00549451	0	0.00735294
Malignant	1	158581134	G	T	p.Gln2394Lys	c.7180C>A	SPTA1	missense_variant	.	.	1	561	0.00534759	0	0.00735294
Malignant	1	158581162	T	G	p.Gln2384His	c.7152A>C	SPTA1	missense_variant	2	0	1	1062	0.00564972	0	0.00735294
Malignant	1	158581182	G	A	.	c.7135-3C>T	SPTA1	splice_region_variant&intron_variant	.	.	1	943	0.00530223	0	0.00735294
Malignant	1	158582637	C	A	p.Lys2368Asn	c.7104G>T	SPTA1	missense_variant	.	.	1	2791	0.00609101	0	0.00735294
Malignant	1	158582647	G	T	p.Ala2365Glu	c.7094C>A	SPTA1	missense_variant	1	1	1	524	0.00572519	0	0.00735294
Malignant	1	158582764	T	C	.	c.6990-13A>G	SPTA1	splice_region_variant&intron_variant	.	.	1	645	0.00620155	0	0.00735294
Malignant	1	158583573	C	A	p.Met2309Ile	c.6927G>T	SPTA1	missense_variant	.	.	1	1363	0.00586941	0	0.00735294
Malignant	1	158585043	G	A	p.Arg2251Trp	c.6751C>T	SPTA1	missense_variant	1	1	1	1587	0.00504096	0	0.00735294
Malignant	1	158587833	C	A	p.Asp2182Tyr	c.6544G>T	SPTA1	missense_variant	1	1	1	597	0.00502513	0	0.00735294
Malignant	1	158587844	G	T	p.Ala2178Asp	c.6533C>A	SPTA1	missense_variant	1	0	1	521	0.00767754	0	0.00735294
Malignant	1	158592844	A	G	p.Trp2017Arg	c.6049T>C	SPTA1	missense_variant	.	.	1	958	0.00626305	0	0.00735294
Malignant	1	158592969	G	T	p.Ala1975Asp	c.5924C>A	SPTA1	missense_variant	.	.	1	717	0.0069735	0	0.00735294
Malignant	1	158596027	C	A	.	c.5834-15G>T	SPTA1	splice_region_variant&intron_variant	.	.	1	547	0.00548446	0	0.00735294
Malignant	1	158596634	C	A	p.Trp1943Leu	c.5828G>T	SPTA1	missense_variant	.	.	1	1144	0.00611888	0	0.00735294
Malignant	1	158596641	C	A	p.Glu1941*	c.5821G>T	SPTA1	stop_gained	1	0	1	1950	0.00512821	0	0.00735294
Malignant	1	158596722	C	A	p.Ala1914Ser	c.5740G>T	SPTA1	missense_variant	1	1	1	1245	0.00562249	0	0.00735294
Malignant	1	158597435	C	A	p.Gly1882*	c.5644G>T	SPTA1	stop_gained	1	0	1	705	0.00567376	0	0.00735294
Malignant	1	158604484	C	G	.	c.5433-19G>C	SPTA1	splice_region_variant&intron_variant	.	.	1	1871	0.00534474	0	0.00735294
Malignant	1	158606423	A	G	.	c.5310+8T>C	SPTA1	splice_region_variant&intron_variant	.	.	1	1097	0.00546946	0	0.00735294
Malignant	1	158607877	G	T	p.Ala1712Asp	c.5135C>A	SPTA1	missense_variant	1	1	1	1103	0.00543971	0	0.00735294
Malignant	1	158609380	C	A	p.Ala1658Ser	c.4972G>T	SPTA1	missense_variant	.	.	1	976	0.00614754	0	0.00735294
Malignant	1	158612711	C	A	p.Ala1500Ser	c.4498G>T	SPTA1	missense_variant	.	.	1	778	0.00514139	0	0.00735294
Malignant	1	158612720	C	A	p.Gly1497*	c.4489G>T	SPTA1	stop_gained	1	0	1	1553	0.00515132	0	0.00735294
Malignant	1	158613116	C	T	p.Asp1480Asn	c.4438G>A	SPTA1	missense_variant	1	0	1	843	0.0059312	0	0.00735294
Malignant	1	158614125	C	A	p.Arg1419Met	c.4256G>T	SPTA1	missense_variant	1	1	1	976	0.00512295	0	0.00735294
Malignant	1	158614181	G	T	p.Phe1400Leu	c.4200C>A	SPTA1	missense_variant	.	.	1	941	0.0063762	0	0.00735294
Malignant	1	158615160	T	A	p.Met1338Leu	c.4012A>T	SPTA1	missense_variant	1	0	1	1594	0.00501882	0	0.00735294
Malignant	1	158615313	C	A	p.Gly1323Val	c.3968G>T	SPTA1	missense_variant	1	0	1	1307	0.00535578	0	0.00735294
Malignant	1	158617322	A	G	.	c.3896+7T>C	SPTA1	splice_region_variant&intron_variant	.	.	1	548	0.00547445	0	0.00735294
Malignant	1	158618427	T	G	p.Lys1196Gln	c.3586A>C	SPTA1	missense_variant	.	.	1	1442	0.00554785	0	0.00735294
Malignant	1	158621234	G	T	p.Leu1134Ile	c.3400C>A	SPTA1	missense_variant	.	.	1	715	0.00699301	0	0.00735294
Malignant	1	158622400	G	T	p.Leu1078Ile	c.3232C>A	SPTA1	missense_variant	1	0	1	981	0.00815494	0	0.00735294
Malignant	1	158623173	G	T	p.Pro1027Thr	c.3079C>A	SPTA1	missense_variant	1	0	1	1507	0.00530856	0	0.00735294
Malignant	1	158624387	G	T	.	c.3036+14C>A	SPTA1	splice_region_variant&intron_variant	.	.	1	1048	0.00858779	0	0.00735294
Malignant	1	158624409	T	C	p.Ile1010Val	c.3028A>G	SPTA1	missense_variant	.	.	1	1213	0.00577082	0	0.00735294
Malignant	1	158624534	T	G	p.Gln968Pro	c.2903A>C	SPTA1	missense_variant	.	.	1	1492	0.00670241	0	0.00735294
Malignant	1	158626354	C	A	p.Gln966His	c.2898G>T	SPTA1	missense_variant	2	2	1	546	0.00915751	0	0.00735294
Malignant	1	158626400	A	C	p.Phe951Cys	c.2852T>G	SPTA1	missense_variant	1	0	1	555	0.00540541	0	0.00735294
Malignant	1	158631091	T	G	p.Lys858Thr	c.2573A>C	SPTA1	missense_variant	1	0	1	1805	0.00554017	0	0.00735294
Malignant	1	158631093	G	T	p.Asn857Lys	c.2571C>A	SPTA1	missense_variant	1	1	1	1703	0.00528479	0	0.00735294
Malignant	1	158631136	G	T	p.Ala843Asp	c.2528C>A	SPTA1	missense_variant	.	.	1	658	0.00607903	0	0.00735294
Malignant	1	158636088	A	C	.	c.2220+18T>G	SPTA1	splice_region_variant&intron_variant	.	.	1	732	0.00546448	0	0.00735294
Malignant	1	158636296	A	G	.	c.2039-9T>C	SPTA1	splice_region_variant&intron_variant	.	.	1	1389	0.217423	0	0.00735294
Malignant	1	158639217	G	T	p.Ala605Glu	c.1814C>A	SPTA1	missense_variant	1	0	1	539	0.00556586	0	0.00735294
Malignant	1	158639228	C	A	p.Lys601Asn	c.1803G>T	SPTA1	missense_variant	1	0	1	1175	0.00510638	0	0.00735294
Malignant	1	158639264	C	A	p.Glu589Asp	c.1767G>T	SPTA1	missense_variant	1	0	1	1339	0.00672143	0	0.00735294
Malignant	1	158639304	C	A	p.Arg576Ile	c.1727G>T	SPTA1	missense_variant	.	.	1	531	0.00564972	0	0.00735294
Malignant	1	158641161	G	T	p.Ala524Asp	c.1571C>A	SPTA1	missense_variant	2	0	1	756	0.00529101	0	0.00735294
Malignant	1	158641246	G	A	p.?	c.1489-3C>T	SPTA1	splice_region_variant&intron_variant	1	0	1	775	0.00516129	0	0.00735294
Malignant	1	158641886	T	C	p.Asp484Gly	c.1451A>G	SPTA1	missense_variant	.	.	1	1451	0.00620262	0	0.00735294
Malignant	1	158644195	C	A	p.Arg425Leu	c.1274G>T	SPTA1	missense_variant	2	1	1	1581	0.00506009	0	0.00735294
Malignant	1	158648178	G	T	.	c.812+13C>A	SPTA1	splice_region_variant&intron_variant	.	.	1	1113	0.00539084	0	0.00735294
Malignant	1	158650356	T	G	.	c.678+17A>C	SPTA1	splice_region_variant&intron_variant	.	.	1	1146	0.0061082	0	0.00735294
Malignant	1	158650429	C	A	p.Val208Leu	c.622G>T	SPTA1	missense_variant	1	1	1	1316	0.00531915	0	0.00735294
Malignant	1	158653173	G	T	p.His126Gln	c.378C>A	SPTA1	missense_variant	.	.	1	917	0.00981461	0	0.00735294
Malignant	1	158653184	G	T	p.His123Asn	c.367C>A	SPTA1	missense_variant	1	0	1	692	0.00578035	0	0.00735294
Malignant	1	158653187	C	A	p.Gly122Cys	c.364G>T	SPTA1	missense_variant	1	0	1	940	0.00531915	0	0.00735294
Malignant	1	158653207	C	A	p.Arg115Met	c.344G>T	SPTA1	missense_variant	1	1	1	952	0.0052521	0	0.00735294
Malignant	1	158653225	G	T	p.Ser109Tyr	c.326C>A	SPTA1	missense_variant	.	.	1	971	0.00514933	0	0.00735294
Malignant	1	158653275	C	A	p.Gln92His	c.276G>T	SPTA1	missense_variant	1	0	1	620	0.00645161	0	0.00735294
Malignant	1	158656301	G	T	p.Gln3Lys	c.7C>A	SPTA1	missense_variant	.	.	1	594	0.00505051	0	0.00735294
Malignant	1	181452987	C	T	p.Ala36Val	c.107C>T	CACNA1E	missense_variant	2	0	1	1814	0.00606395	0	0.00735294
Malignant	1	181546915	G	A	p.Ala176Thr	c.526G>A	CACNA1E	missense_variant	1	0	1	1464	0.00546448	0	0.00735294
Malignant	1	181546966	C	T	p.Arg193Cys	c.577C>T	CACNA1E	missense_variant	.	.	1	565	0.00530973	0	0.00735294
Malignant	1	181548350	G	A	p.Met253Ile	c.759G>A	CACNA1E	missense_variant	.	.	1	542	0.00553506	0	0.00735294
Malignant	1	181620585	A	C	.	c.1055+8A>C	CACNA1E	splice_region_variant&intron_variant	.	.	1	522	0.00574713	0	0.00735294
Malignant	1	181695194	T	C	.	c.2143-7T>C	CACNA1E	splice_region_variant&intron_variant	.	.	1	985	0.00507614	0	0.00735294
Malignant	1	181705508	G	T	p.Lys1120Asn	c.3360G>T	CACNA1E	missense_variant	1	0	1	1983	0.00655572	0	0.00735294
Malignant	1	181719630	A	G	.	c.3731+7A>G	CACNA1E	splice_region_variant&intron_variant	.	.	1	782	0.00511509	0	0.00735294
Malignant	1	181726114	G	A	p.Ser1394Asn	c.4181G>A	CACNA1E	missense_variant	1	0	1	507	0.00591716	0	0.00735294
Malignant	1	181727265	C	T	.	c.4494+18C>T	CACNA1E	splice_region_variant&intron_variant	.	.	1	1629	0.00552486	0	0.00735294
Malignant	1	181731728	T	C	p.Trp1542Arg	c.4624T>C	CACNA1E	missense_variant	1	0	1	533	0.00562852	0	0.00735294
Malignant	1	181731770	G	T	p.Glu1556*	c.4666G>T	CACNA1E	stop_gained	1	0	1	534	0.00749064	0	0.00735294
Malignant	1	181735665	C	T	.	c.4816-17C>T	CACNA1E	splice_region_variant&intron_variant	.	.	1	881	0.00567537	0	0.00735294
Malignant	1	181750568	G	A	p.Arg1758His	c.5273G>A	CACNA1E	missense_variant	1	0	1	1285	0.00544747	0	0.00735294
Malignant	1	181753898	C	A	p.Pro1858Thr	c.5572C>A	CACNA1E	missense_variant	.	.	1	985	0.00507614	0	0.00735294
Malignant	1	181767494	C	T	p.Arg2156Cys	c.6466C>T	CACNA1E	missense_variant	2	0	1	1524	0.00590551	0	0.00735294
Malignant	1	181767603	G	C	p.Gly2192Ala	c.6575G>C	CACNA1E	missense_variant	.	.	1	758	0.00527704	0	0.00735294
Malignant	1	181767608	C	T	p.Pro2194Ser	c.6580C>T	CACNA1E	missense_variant	.	.	1	763	0.00524246	0	0.00735294
Malignant	1	181767923	G	A	p.Ala2299Thr	c.6895G>A	CACNA1E	missense_variant	.	.	1	679	0.00883652	0	0.00735294
Malignant	1	182812524	G	T	p.Leu69Phe	c.207G>T	DHX9	missense_variant	1	1	1	623	0.00642055	0	0.00735294
Malignant	1	182821479	G	A	p.Glu122Lys	c.364G>A	DHX9	missense_variant	.	.	1	674	0.00593472	0	0.00735294
Malignant	1	182822551	G	T	p.Ala159Ser	c.475G>T	DHX9	missense_variant&splice_region_variant	1	0	1	882	0.00566893	0	0.00735294
Malignant	1	182823234	G	T	p.Ala183Ser	c.547G>T	DHX9	missense_variant	2	0	1	703	0.0056899	0	0.00735294
Malignant	1	182823306	C	A	p.His207Asn	c.619C>A	DHX9	missense_variant	1	0	1	799	0.00750939	0	0.00735294
Malignant	1	182827240	G	T	p.Arg225Ser	c.675G>T	DHX9	missense_variant&splice_region_variant	1	0	1	581	0.00516351	0	0.00735294
Malignant	1	182828179	C	A	p.Thr356Asn	c.1067C>A	DHX9	missense_variant	.	.	1	707	0.00707214	0	0.00735294
Malignant	1	182836152	G	T	p.Asp511Tyr	c.1531G>T	DHX9	missense_variant	1	0	1	1116	0.00537634	0	0.00735294
Malignant	1	182841579	C	A	p.Phe555Leu	c.1665C>A	DHX9	missense_variant	1	0	1	913	0.00766703	0	0.00735294
Malignant	1	182841637	G	T	.	c.1714+9G>T	DHX9	splice_region_variant&intron_variant	.	.	1	780	0.00512821	0	0.00735294
Malignant	1	182844049	A	T	p.Lys592Met	c.1775A>T	DHX9	missense_variant	1	0	1	623	0.00642055	0	0.00735294
Malignant	1	182845357	T	G	p.Ile663Ser	c.1988T>G	DHX9	missense_variant	1	0	1	1068	0.00749064	0	0.00735294
Malignant	1	182848366	T	A	.	c.2352-19T>A	DHX9	splice_region_variant&intron_variant	.	.	1	1127	0.00532387	0	0.00735294
Malignant	1	182849673	G	T	p.Gly852*	c.2554G>T	DHX9	stop_gained	1	0	1	509	0.00589391	0	0.00735294
Malignant	1	182852495	G	T	p.Gly1046Cys	c.3136G>T	DHX9	missense_variant	.	.	1	949	0.00632244	0	0.00735294
Malignant	1	182853947	C	T	p.Arg1154Trp	c.3460C>T	DHX9	missense_variant&splice_region_variant	1	0	1	910	0.00549451	0	0.00735294
Malignant	1	182856430	G	A	p.Gly1225Asp	c.3674G>A	DHX9	missense_variant	.	.	1	747	0.00669344	0	0.00735294
Malignant	1	190067151	A	T	p.Ser766Arg	c.2298T>A	BRINP3	missense_variant	.	.	1	583	0.0051458	0	0.00735294
Malignant	1	190067155	C	A	p.Cys765Phe	c.2294G>T	FAM5C	missense_variant	1	1	1	796	0.00628141	0	0.00735294
Malignant	1	190067188	G	T	p.Pro754Gln	c.2261C>A	FAM5C	missense_variant	1	1	1	1096	0.00638686	0	0.00735294
Malignant	1	190067271	G	T	p.Cys726*	c.2178C>A	FAM5C	stop_gained	2	0	1	1389	0.0050396	0	0.00735294
Malignant	1	190067282	G	T	p.Leu723Ile	c.2167C>A	FAM5C	missense_variant	1	0	1	1417	0.00635145	0	0.00735294
Malignant	1	190067601	G	T	p.Asn616Lys	c.1848C>A	FAM5C	missense_variant	1	1	1	1493	0.00669792	0	0.00735294
Malignant	1	190068115	T	C	p.Asp445Gly	c.1334A>G	BRINP3	missense_variant	.	.	1	545	0.00550459	0	0.00735294
Malignant	1	190068164	G	C	p.Pro429Ala	c.1285C>G	BRINP3	missense_variant	.	.	1	2513	0.00596896	0	0.00735294
Malignant	1	190129790	T	A	p.?	c.1184+8A>T	FAM5C	splice_region_variant&intron_variant	1	0	1	649	0.00770416	0	0.00735294
Malignant	1	190129813	C	A	p.Ser390Ile	c.1169G>T	FAM5C	missense_variant	1	1	1	732	0.00546448	0	0.00735294
Malignant	1	190129857	C	A	p.Lys375Asn	c.1125G>T	FAM5C	missense_variant	1	0	1	595	0.00672269	0	0.00735294
Malignant	1	190129922	G	T	p.Arg354Ser	c.1060C>A	BRINP3	missense_variant	.	.	1	581	0.00516351	0	0.00735294
Malignant	1	190234069	C	A	p.Ala182Ser	c.544G>T	FAM5C	missense_variant	3	1	1	560	0.00535714	0	0.00735294
Malignant	1	190234174	G	A	p.Leu147Phe	c.439C>T	BRINP3	missense_variant	.	.	1	1142	0.00525394	0	0.00735294
Malignant	1	190250686	G	A	p.?	c.427+4C>T	FAM5C	splice_region_variant&intron_variant	1	0	1	785	0.00509554	0	0.00735294
Malignant	1	190250861	C	A	p.Val86Leu	c.256G>T	BRINP3	missense_variant	.	.	1	725	0.00551724	0	0.00735294
Malignant	1	190423800	C	A	p.Arg74Ile	c.221G>T	FAM5C	missense_variant	2	0	1	573	0.0069808	0	0.00735294
Malignant	1	190423918	C	T	p.Val35Ile	c.103G>A	FAM5C	missense_variant	1	0	1	698	0.0114613	0	0.00735294
Malignant	1	190423929	G	A	p.Ala31Val	c.92C>T	BRINP3	missense_variant	.	.	1	579	0.00518135	0	0.00735294
Malignant	1	237433914	A	C	p.Lys56Gln	c.166A>C	RYR2	missense_variant	.	.	1	755	0.00529801	0	0.00735294
Malignant	1	237494193	C	T	p.Leu62Phe	c.184C>T	RYR2	missense_variant	.	.	1	807	0.00743494	0	0.00735294
Malignant	1	237494277	G	A	p.Glu90Lys	c.268G>A	RYR2	missense_variant	1	0	1	580	0.00517241	0	0.00735294
Malignant	1	237527686	A	G	.	c.309+14A>G	RYR2	splice_region_variant&intron_variant	.	.	1	565	0.00530973	0	0.00735294
Malignant	1	237532902	T	A	p.Ser126Arg	c.378T>A	RYR2	missense_variant	.	.	1	1148	0.00522648	0	0.00735294
Malignant	1	237538109	G	A	.	c.463+14G>A	RYR2	splice_region_variant&intron_variant	.	.	1	870	0.00689655	0	0.00735294
Malignant	1	237538114	G	A	.	c.463+19G>A	RYR2	splice_region_variant&intron_variant	.	.	1	600	0.00833333	0	0.00735294
Malignant	1	237540665	G	T	p.Arg169Leu	c.506G>T	RYR2	missense_variant	.	.	1	927	0.00755124	0	0.00735294
Malignant	1	237551425	G	A	p.Gly239Arg	c.715G>A	RYR2	missense_variant	1	0	1	1289	0.00543057	0	0.00735294
Malignant	1	237551480	G	A	p.Arg257Gln	c.770G>A	RYR2	missense_variant	1	0	1	677	0.0118168	0	0.00735294
Malignant	1	237551490	A	G	p.?	c.773+7A>G	RYR2	splice_region_variant&intron_variant	1	0	1	594	0.00505051	0	0.00735294
Malignant	1	237580335	G	T	.	c.774-14G>T	RYR2	splice_region_variant&intron_variant	.	.	1	555	0.00540541	0	0.00735294
Malignant	1	237580366	G	T	p.Gly264Val	c.791G>T	RYR2	missense_variant	1	0	1	566	0.00706714	0	0.00735294
Malignant	1	237580378	C	T	p.Ser268Phe	c.803C>T	RYR2	missense_variant	1	0	1	745	0.00671141	0	0.00735294
Malignant	1	237580407	G	T	p.Glu278*	c.832G>T	RYR2	stop_gained	1	1	1	578	0.00519031	0	0.00735294
Malignant	1	237604635	G	T	p.Gly341Val	c.1022G>T	RYR2	missense_variant	1	1	1	759	0.00527009	0	0.00735294
Malignant	1	237604682	G	T	p.Gly357Cys	c.1069G>T	RYR2	missense_variant	2	2	1	766	0.0078329	0	0.00735294
Malignant	1	237604736	C	A	p.Gln375Lys	c.1123C>A	RYR2	missense_variant	.	.	1	756	0.00529101	0	0.00735294
Malignant	1	237604795	G	T	.	c.1170+12G>T	RYR2	splice_region_variant&intron_variant	.	.	1	974	0.00513347	0	0.00735294
Malignant	1	237608687	T	G	.	c.1171-14T>G	RYR2	splice_region_variant&intron_variant	.	.	1	2035	0.00835381	0	0.00735294
Malignant	1	237608709	G	T	p.Met393Ile	c.1179G>T	RYR2	missense_variant	.	.	1	669	0.0179372	0	0.00735294
Malignant	1	237608793	C	A	p.Ser421Arg	c.1263C>A	RYR2	missense_variant	1	1	1	583	0.0051458	0	0.00735294
Malignant	1	237617693	G	T	p.Gly432Val	c.1295G>T	RYR2	missense_variant	.	.	1	908	0.00660793	0	0.00735294
Malignant	1	237617722	G	T	p.Ala442Ser	c.1324G>T	RYR2	missense_variant	.	.	1	989	0.00606673	0	0.00735294
Malignant	1	237617769	G	T	p.Gln457His	c.1371G>T	RYR2	missense_variant	1	1	1	963	0.00519211	0	0.00735294
Malignant	1	237619889	T	TA	.	c.1477-9dupA	RYR2	splice_region_variant&intron_variant	.	.	1	1070	0.00654206	0	0.00735294
Malignant	1	237619932	C	A	p.Asp503Glu	c.1509C>A	RYR2	missense_variant	.	.	1	975	0.00820513	0	0.00735294
Malignant	1	237619967	C	A	p.Ala515Asp	c.1544C>A	RYR2	missense_variant	1	0	1	1011	0.00593472	0	0.00735294
Malignant	1	237619976	C	A	p.Ala518Asp	c.1553C>A	RYR2	missense_variant	1	0	1	1057	0.00567644	0	0.00735294
Malignant	1	237620044	C	A	p.?	c.1612+9C>A	RYR2	splice_region_variant&intron_variant	1	0	1	837	0.00716846	0	0.00735294
Malignant	1	237632392	C	T	p.Ala538Val	c.1613C>T	RYR2	missense_variant	.	.	1	551	0.00725953	0	0.00735294
Malignant	1	237632445	G	A	p.Asp556Asn	c.1666G>A	RYR2	missense_variant	.	.	1	756	0.00529101	0	0.00735294
Malignant	1	237632458	G	T	p.Ser560Ile	c.1679G>T	RYR2	missense_variant	1	0	1	590	0.00508475	0	0.00735294
Malignant	1	237655172	G	T	p.Gly592Val	c.1775G>T	RYR2	missense_variant	.	.	1	571	0.00525394	0	0.00735294
Malignant	1	237655216	A	T	p.Asn607Tyr	c.1819A>T	RYR2	missense_variant	.	.	1	517	0.00580271	0	0.00735294
Malignant	1	237656270	G	T	p.Cys615Phe	c.1844G>T	RYR2	missense_variant	1	1	1	1049	0.00953289	0	0.00735294
Malignant	1	237656303	G	A	p.Arg626His	c.1877G>A	RYR2	missense_variant	2	0	1	760	0.00526316	0	0.00735294
Malignant	1	237656314	C	A	p.His630Asn	c.1888C>A	RYR2	missense_variant	.	.	1	532	0.0075188	0	0.00735294
Malignant	1	237656365	C	A	p.Arg647Ser	c.1939C>A	RYR2	missense_variant	1	1	1	977	0.00511771	0	0.00735294
Malignant	1	237659799	G	T	.	c.1962-12G>T	RYR2	splice_region_variant&intron_variant	.	.	1	1113	0.00718778	0	0.00735294
Malignant	1	237659980	G	A	p.Glu711Lys	c.2131G>A	RYR2	missense_variant	3	2	1	2054	0.00584226	0	0.00735294
Malignant	1	237664049	C	A	p.Leu748Met	c.2242C>A	RYR2	missense_variant	.	.	1	1187	0.00505476	0	0.00735294
Malignant	1	237666578	A	G	.	c.2397-11A>G	RYR2	splice_region_variant&intron_variant	.	.	1	1107	0.00542005	0	0.00735294
Malignant	1	237666594	G	A	p.Arg801His	c.2402G>A	RYR2	missense_variant	.	.	1	1123	0.00534283	0	0.00735294
Malignant	1	237666594	G	T	p.Arg801Leu	c.2402G>T	RYR2	missense_variant	.	.	1	906	0.00993377	0	0.00735294
Malignant	1	237670022	C	T	p.Pro876Ser	c.2626C>T	RYR2	missense_variant	1	1	1	1022	0.00684932	0	0.00735294
Malignant	1	237670064	C	A	p.His890Asn	c.2668C>A	RYR2	missense_variant	2	2	1	777	0.00514801	0	0.00735294
Malignant	1	237693784	G	T	p.Lys960Asn	c.2880G>T	RYR2	missense_variant	1	1	1	1056	0.00662879	0	0.00735294
Malignant	1	237693808	G	T	p.Lys968Asn	c.2904G>T	RYR2	missense_variant	.	.	1	599	0.00500835	0	0.00735294
Malignant	1	237693824	C	T	.	c.2906+14C>T	RYR2	splice_region_variant&intron_variant	.	.	1	1193	0.00586756	0	0.00735294
Malignant	1	237713941	G	A	p.Arg1055His	c.3164G>A	RYR2	missense_variant	1	0	1	968	0.00516529	0	0.00735294
Malignant	1	237732430	C	T	.	c.3424-15C>T	RYR2	splice_region_variant&intron_variant	.	.	1	763	0.00524246	0	0.00735294
Malignant	1	237732489	G	T	p.Trp1156Cys	c.3468G>T	RYR2	missense_variant	1	1	1	1222	0.00572831	0	0.00735294
Malignant	1	237732533	A	G	p.His1171Arg	c.3512A>G	RYR2	missense_variant	.	.	1	791	0.00505689	0	0.00735294
Malignant	1	237732616	G	A	p.Asp1199Asn	c.3595G>A	RYR2	missense_variant	1	0	1	1169	0.00513259	0	0.00735294
Malignant	1	237732635	T	G	.	c.3598+16T>G	RYR2	splice_region_variant&intron_variant	.	.	1	1832	0.00600437	0	0.00735294
Malignant	1	237753090	C	A	.	c.3599-3C>A	RYR2	splice_region_variant&intron_variant	.	.	1	689	0.00725689	0	0.00735294
Malignant	1	237753186	G	T	p.Gly1231Val	c.3692G>T	RYR2	missense_variant	.	.	1	903	0.0055371	0	0.00735294
Malignant	1	237753212	G	T	p.Ala1240Ser	c.3718G>T	RYR2	missense_variant	1	1	1	540	0.00740741	0	0.00735294
Malignant	1	237754026	T	G	p.Asp1298Glu	c.3894T>G	RYR2	missense_variant	.	.	1	1547	0.00646412	0	0.00735294
Malignant	1	237755069	C	A	p.Tyr1397*	c.4191C>A	RYR2	stop_gained	.	.	1	536	0.00559701	0	0.00735294
Malignant	1	237756779	T	A	p.Tyr1427Asn	c.4279T>A	RYR2	missense_variant	1	0	1	1142	0.00525394	0	0.00735294
Malignant	1	237756813	C	A	p.Pro1438His	c.4313C>A	RYR2	missense_variant	.	.	1	725	0.00551724	0	0.00735294
Malignant	1	237774057	G	A	p.?	c.4684-5G>A	RYR2	splice_region_variant&intron_variant	2	0	1	1037	0.00578592	0	0.00735294
Malignant	1	237774059	T	G	p.?	c.4684-3T>G	RYR2	splice_region_variant&intron_variant	2	0	1	652	0.00613497	0	0.00735294
Malignant	1	237774165	G	A	p.Trp1596*	c.4787G>A	RYR2	stop_gained	.	.	1	1371	0.00802334	0	0.00735294
Malignant	1	237777506	A	G	p.Tyr1693Cys	c.5078A>G	RYR2	missense_variant	.	.	1	1352	0.00517751	0	0.00735294
Malignant	1	237778084	G	A	p.Gly1886Ser	c.5656G>A	RYR2	missense_variant	3	0	1	1985	0.192947	0	0.00735294
Malignant	1	237780714	G	T	p.Met1948Ile	c.5844G>T	RYR2	missense_variant	1	1	1	1177	0.00509771	0	0.00735294
Malignant	1	237787060	T	C	.	c.5917-5T>C	RYR2	splice_region_variant&intron_variant	.	.	1	778	0.00514139	0	0.00735294
Malignant	1	237787125	C	A	p.Arg1993Ser	c.5977C>A	RYR2	missense_variant	.	.	1	590	0.00508475	0	0.00735294
Malignant	1	237787131	C	A	p.Gln1995Lys	c.5983C>A	RYR2	missense_variant	1	1	1	560	0.00535714	0	0.00735294
Malignant	1	237788944	C	T	.	c.6023-17C>T	RYR2	splice_region_variant&intron_variant	.	.	1	910	0.00549451	0	0.00735294
Malignant	1	237789072	A	G	p.Glu2045Gly	c.6134A>G	RYR2	missense_variant	.	.	1	687	0.00582242	0	0.00735294
Malignant	1	237791087	T	A	.	c.6167-20T>A	RYR2	splice_region_variant&intron_variant	.	.	1	560	0.00535714	0	0.00735294
Malignant	1	237791104	C	T	.	c.6167-3C>T	RYR2	splice_region_variant&intron_variant	.	.	1	694	0.00720461	0	0.00735294
Malignant	1	237791376	T	G	p.Leu2146Val	c.6436T>G	RYR2	missense_variant	.	.	1	777	0.00514801	0	0.00735294
Malignant	1	237794806	G	T	p.Val2174Phe	c.6520G>T	RYR2	missense_variant	.	.	1	551	0.00544465	0	0.00735294
Malignant	1	237796942	G	A	p.Ser2207Asn	c.6620G>A	RYR2	missense_variant	1	0	1	1726	0.00811124	0	0.00735294
Malignant	1	237801672	G	T	p.Ala2270Ser	c.6808G>T	RYR2	missense_variant	1	0	1	691	0.0115774	0	0.00735294
Malignant	1	237801675	G	T	p.Gly2271Cys	c.6811G>T	RYR2	missense_variant	.	.	1	508	0.00590551	0	0.00735294
Malignant	1	237802315	G	T	p.Gly2310Val	c.6929G>T	RYR2	missense_variant	1	0	1	769	0.00520156	0	0.00735294
Malignant	1	237802319	G	T	p.Glu2311Asp	c.6933G>T	RYR2	missense_variant	.	.	1	767	0.0065189	0	0.00735294
Malignant	1	237802336	C	A	p.Ala2317Glu	c.6950C>A	RYR2	missense_variant	.	.	1	514	0.00972763	0	0.00735294
Malignant	1	237802400	A	T	p.Glu2338Asp	c.7014A>T	RYR2	missense_variant	.	.	1	1185	0.00506329	0	0.00735294
Malignant	1	237802492	G	T	p.Ser2369Ile	c.7106G>T	RYR2	missense_variant	1	0	1	713	0.0056101	0	0.00735294
Malignant	1	237802514	T	A	.	c.7115+13T>A	RYR2	splice_region_variant&intron_variant	.	.	1	519	0.00578035	0	0.00735294
Malignant	1	237806630	A	T	p.Ile2409Phe	c.7225A>T	RYR2	missense_variant	.	.	1	547	0.00548446	0	0.00735294
Malignant	1	237806644	G	T	p.Lys2413Asn	c.7239G>T	RYR2	missense_variant	1	1	1	840	0.00595238	0	0.00735294
Malignant	1	237813208	C	A	p.Ala2515Asp	c.7544C>A	RYR2	missense_variant	3	0	1	723	0.00829876	0	0.00735294
Malignant	1	237813222	C	A	p.Leu2520Ile	c.7558C>A	RYR2	missense_variant	.	.	1	1071	0.00746965	0	0.00735294
Malignant	1	237813270	G	T	p.Ala2536Ser	c.7606G>T	RYR2	missense_variant	1	1	1	1013	0.005923	0	0.00735294
Malignant	1	237813276	A	G	p.Thr2538Ala	c.7612A>G	RYR2	missense_variant	.	.	1	1378	0.00507983	0	0.00735294
Malignant	1	237813285	C	A	p.His2541Asn	c.7621C>A	RYR2	missense_variant	.	.	1	978	0.00511247	0	0.00735294
Malignant	1	237813363	G	A	p.Asp2567Asn	c.7699G>A	RYR2	missense_variant	.	.	1	653	0.00612557	0	0.00735294
Malignant	1	237814784	G	A	p.Ala2603Thr	c.7807G>A	RYR2	missense_variant	.	.	1	543	0.00552486	0	0.00735294
Malignant	1	237817567	C	A	.	c.7825-7C>A	RYR2	splice_region_variant&intron_variant	.	.	1	685	0.00729927	0	0.00735294
Malignant	1	237817603	G	T	p.Trp2618Cys	c.7854G>T	RYR2	missense_variant	1	0	1	712	0.00561798	0	0.00735294
Malignant	1	237817634	A	C	p.Asn2629His	c.7885A>C	RYR2	missense_variant	.	.	1	768	0.00520833	0	0.00735294
Malignant	1	237817700	G	A	p.Ala2651Thr	c.7951G>A	RYR2	missense_variant	1	1	1	886	0.00564334	0	0.00735294
Malignant	1	237819137	T	A	p.Leu2661His	c.7982T>A	RYR2	missense_variant	1	0	1	575	0.00695652	0	0.00735294
Malignant	1	237819155	C	A	p.Pro2667His	c.8000C>A	RYR2	missense_variant	1	1	1	795	0.00503145	0	0.00735294
Malignant	1	237819222	G	T	p.Met2689Ile	c.8067G>T	RYR2	missense_variant	.	.	1	694	0.00576369	0	0.00735294
Malignant	1	237821320	A	G	p.Lys2736Glu	c.8206A>G	RYR2	missense_variant	1	0	1	804	0.00995025	0	0.00735294
Malignant	1	237829824	G	A	p.Ala2817Thr	c.8449G>A	RYR2	missense_variant	1	0	1	1742	0.00516648	0	0.00735294
Malignant	1	237829901	T	C	.	c.8514+12T>C	RYR2	splice_region_variant&intron_variant	.	.	1	537	0.00558659	0	0.00735294
Malignant	1	237838040	G	T	p.Lys2908Asn	c.8724G>T	RYR2	missense_variant	1	1	1	509	0.00982318	0	0.00735294
Malignant	1	237838043	C	G	p.Asp2909Glu	c.8727C>G	RYR2	missense_variant	1	0	1	979	0.0061287	0	0.00735294
Malignant	1	237838123	C	G	p.Ala2936Gly	c.8807C>G	RYR2	missense_variant	1	0	1	903	0.0055371	0	0.00735294
Malignant	1	237838135	T	A	p.Ile2940Asn	c.8819T>A	RYR2	missense_variant	1	0	1	866	0.00577367	0	0.00735294
Malignant	1	237841350	G	T	p.Gly2945Cys	c.8833G>T	RYR2	missense_variant	1	0	1	911	0.00658617	0	0.00735294
Malignant	1	237850798	C	A	p.Leu3021Ile	c.9061C>A	RYR2	missense_variant	1	1	1	979	0.00510725	0	0.00735294
Malignant	1	237863590	G	A	p.Ala3064Thr	c.9190G>A	RYR2	missense_variant	.	.	1	1419	0.00563777	0	0.00735294
Malignant	1	237865264	C	A	.	c.9368-14C>A	RYR2	splice_region_variant&intron_variant	.	.	1	814	0.00614251	0	0.00735294
Malignant	1	237865352	G	A	p.Val3148Met	c.9442G>A	RYR2	missense_variant	.	.	1	597	0.00502513	0	0.00735294
Malignant	1	237868652	G	A	.	c.9580+9G>A	RYR2	splice_region_variant&intron_variant	.	.	1	1295	0.00540541	0	0.00735294
Malignant	1	237870363	C	A	p.Pro3232Gln	c.9695C>A	RYR2	missense_variant	1	1	1	564	0.00531915	0	0.00735294
Malignant	1	237870579	G	A	p.?	c.9901+10G>A	RYR2	splice_region_variant&intron_variant	1	0	1	743	0.00538358	0	0.00735294
Malignant	1	237872218	C	T	p.Pro3321Leu	c.9962C>T	RYR2	missense_variant	.	.	1	1121	0.00535236	0	0.00735294
Malignant	1	237872245	C	A	p.Ala3330Glu	c.9989C>A	RYR2	missense_variant	.	.	1	1790	0.00502793	0	0.00735294
Malignant	1	237872820	C	T	p.Leu3395Phe	c.10183C>T	RYR2	missense_variant	1	0	1	993	0.00704935	0	0.00735294
Malignant	1	237880535	G	A	p.Arg3454His	c.10361G>A	RYR2	missense_variant	1	1	1	625	0.0064	0	0.00735294
Malignant	1	237881758	A	G	.	c.10495-4A>G	RYR2	splice_region_variant&intron_variant	.	.	1	806	0.00744417	0	0.00735294
Malignant	1	237881772	A	C	p.Glu3502Ala	c.10505A>C	RYR2	missense_variant	.	.	1	1040	0.00576923	0	0.00735294
Malignant	1	237881827	C	A	.	c.10554+6C>A	RYR2	splice_region_variant&intron_variant	.	.	1	547	0.00548446	0	0.00735294
Malignant	1	237886415	C	CT	.	c.10555-7dupT	RYR2	splice_region_variant&intron_variant	.	.	1	580	0.00517241	0	0.00735294
Malignant	1	237886430	G	T	p.Leu3519Phe	c.10557G>T	RYR2	missense_variant&splice_region_variant	.	.	1	578	0.00519031	0	0.00735294
Malignant	1	237886438	C	A	p.Pro3522His	c.10565C>A	RYR2	missense_variant	.	.	1	777	0.00514801	0	0.00735294
Malignant	1	237886477	C	A	p.Pro3535Gln	c.10604C>A	RYR2	missense_variant	2	1	1	594	0.00505051	0	0.00735294
Malignant	1	237889621	C	T	.	c.10725+13C>T	RYR2	splice_region_variant&intron_variant	.	.	1	566	0.00530035	0	0.00735294
Malignant	1	237890387	G	T	p.Val3576Leu	c.10726G>T	RYR2	missense_variant	1	0	1	684	0.00584795	0	0.00735294
Malignant	1	237890477	G	A	p.Ala3606Thr	c.10816G>A	RYR2	missense_variant	.	.	1	1383	0.00506146	0	0.00735294
Malignant	1	237893654	G	T	p.Ala3645Ser	c.10933G>T	RYR2	missense_variant	1	0	1	1276	0.00548589	0	0.00735294
Malignant	1	237895353	G	T	p.Gly3648Val	c.10943G>T	RYR2	missense_variant	.	.	1	669	0.00597907	0	0.00735294
Malignant	1	237895409	C	A	p.Leu3667Met	c.10999C>A	RYR2	missense_variant	1	1	1	977	0.00511771	0	0.00735294
Malignant	1	237897032	G	T	p.Met3689Ile	c.11067G>T	RYR2	missense_variant	1	0	1	557	0.005386	0	0.00735294
Malignant	1	237897046	T	A	p.Ile3694Asn	c.11081T>A	RYR2	missense_variant	1	0	1	662	0.0060423	0	0.00735294
Malignant	1	237905585	T	TA	.	c.11092-8dupA	RYR2	splice_region_variant&intron_variant	.	.	1	928	0.00646552	0	0.00735294
Malignant	1	237919582	G	A	.	c.11146-6G>A	RYR2	splice_region_variant&intron_variant	.	.	1	562	0.00711744	0	0.00735294
Malignant	1	237919612	C	A	p.Leu3724Ile	c.11170C>A	RYR2	missense_variant	1	0	1	718	0.00696379	0	0.00735294
Malignant	1	237920994	T	C	.	c.11246-3T>C	RYR2	splice_region_variant&intron_variant	.	.	1	557	0.00718133	0	0.00735294
Malignant	1	237921083	G	A	.	c.11325+7G>A	RYR2	splice_region_variant&intron_variant	.	.	1	833	0.0060024	0	0.00735294
Malignant	1	237923098	A	T	p.Glu3783Val	c.11348A>T	RYR2	missense_variant	.	.	1	542	0.00738007	0	0.00735294
Malignant	1	237924256	G	A	p.Val3802Ile	c.11404G>A	RYR2	missense_variant	.	.	1	1134	0.00529101	0	0.00735294
Malignant	1	237934206	C	T	.	c.11557+19C>T	RYR2	splice_region_variant&intron_variant	.	.	1	579	0.00518135	0	0.00735294
Malignant	1	237935342	G	A	p.Gly3863Asp	c.11588G>A	RYR2	missense_variant	.	.	1	536	0.00746269	0	0.00735294
Malignant	1	237935408	G	A	p.?	c.11646+8G>A	RYR2	splice_region_variant&intron_variant	1	0	1	632	0.00791139	0	0.00735294
Malignant	1	237936804	C	A	.	c.11647-16C>A	RYR2	splice_region_variant&intron_variant	.	.	1	713	0.0056101	0	0.00735294
Malignant	1	237936851	C	A	p.Ser3893Tyr	c.11678C>A	RYR2	missense_variant	1	1	1	783	0.00510856	0	0.00735294
Malignant	1	237936966	G	A	.	c.11775+18G>A	RYR2	splice_region_variant&intron_variant	.	.	1	1098	0.00546448	0	0.00735294
Malignant	1	237942026	G	A	p.Gly3946Ser	c.11836G>A	RYR2	missense_variant	.	.	1	1217	0.00657354	0	0.00735294
Malignant	1	237944958	T	A	.	c.11962+12T>A	RYR2	splice_region_variant&intron_variant	.	.	1	625	0.008	0	0.00735294
Malignant	1	237947112	G	T	p.Glu4034*	c.12100G>T	RYR2	stop_gained	1	1	1	1455	0.00962199	0	0.00735294
Malignant	1	237947118	G	T	p.Asp4036Tyr	c.12106G>T	RYR2	missense_variant	1	0	1	1489	0.00671592	0	0.00735294
Malignant	1	237947416	G	A	p.Arg4135His	c.12404G>A	RYR2	missense_variant	3	0	1	918	0.00544662	0	0.00735294
Malignant	1	237947931	C	T	p.Arg4307Cys	c.12919C>T	RYR2	missense_variant	1	0	1	507	0.00591716	0	0.00735294
Malignant	1	237947961	A	C	p.Ser4317Arg	c.12949A>C	RYR2	missense_variant	1	0	1	3043	0.00722971	0	0.00735294
Malignant	1	237948241	T	A	p.Val4410Asp	c.13229T>A	RYR2	missense_variant	1	0	1	783	0.00510856	0	0.00735294
Malignant	1	237949265	C	A	.	c.13261-4C>A	RYR2	splice_region_variant&intron_variant	.	.	1	707	0.00565771	0	0.00735294
Malignant	1	237949305	G	T	p.Glu4433*	c.13297G>T	RYR2	stop_gained	1	0	1	780	0.0102564	0	0.00735294
Malignant	1	237949327	A	G	p.Glu4440Gly	c.13319A>G	RYR2	missense_variant	1	0	1	967	0.00517063	0	0.00735294
Malignant	1	237951288	G	T	p.Glu4443Asp	c.13329G>T	RYR2	missense_variant	.	.	1	761	0.00525624	0	0.00735294
Malignant	1	237955438	C	T	p.Leu4533Phe	c.13597C>T	RYR2	missense_variant	.	.	1	817	0.00856793	0	0.00735294
Malignant	1	237957204	C	A	p.Ala4607Glu	c.13820C>A	RYR2	missense_variant	1	1	1	540	0.00555556	0	0.00735294
Malignant	1	237957224	G	T	p.Gly4614Trp	c.13840G>T	RYR2	missense_variant	1	1	1	599	0.00500835	0	0.00735294
Malignant	1	237957267	G	T	p.Gly4628Val	c.13883G>T	RYR2	missense_variant	1	1	1	579	0.00518135	0	0.00735294
Malignant	1	237958599	A	G	p.Asn4642Asp	c.13924A>G	RYR2	missense_variant	.	.	1	545	0.00550459	0	0.00735294
Malignant	1	237961327	A	G	.	c.13957-10A>G	RYR2	splice_region_variant&intron_variant	.	.	1	1216	0.00575658	0	0.00735294
Malignant	1	237965153	C	A	.	c.14091-3C>A	RYR2	splice_region_variant&intron_variant	.	.	1	731	0.00547196	0	0.00735294
Malignant	1	237965199	G	T	p.Val4712Phe	c.14134G>T	RYR2	missense_variant	.	.	1	720	0.00555556	0	0.00735294
Malignant	1	237969421	C	T	.	c.14152-16C>T	RYR2	splice_region_variant&intron_variant	.	.	1	1701	0.0170488	0	0.00735294
Malignant	1	237969439	C	A	p.Ser4718Ser	c.14154C>A	RYR2	splice_region_variant&synonymous_variant	1	1	1	675	0.00740741	0	0.00735294
Malignant	1	237969443	C	A	p.Leu4720Ile	c.14158C>A	RYR2	missense_variant	1	0	1	675	0.00888889	0	0.00735294
Malignant	1	237969583	G	T	p.Gln4766His	c.14298G>T	RYR2	missense_variant&splice_region_variant	1	0	1	1097	0.00729262	0	0.00735294
Malignant	1	237972324	G	T	p.Asp4808Tyr	c.14422G>T	RYR2	missense_variant	2	2	1	664	0.0060241	0	0.00735294
Malignant	1	237991665	T	G	.	c.14591-16T>G	RYR2	splice_region_variant&intron_variant	.	.	1	513	0.00779727	0	0.00735294
Malignant	1	237991720	A	G	p.Gln4877Arg	c.14630A>G	RYR2	missense_variant	1	1	1	795	0.00628931	0	0.00735294
Malignant	1	237991737	G	T	p.Asp4883Tyr	c.14647G>T	RYR2	missense_variant	.	.	1	572	0.00524476	0	0.00735294
Malignant	1	237994795	A	G	.	c.14757-19A>G	RYR2	splice_region_variant&intron_variant	.	.	1	516	0.00581395	0	0.00735294
Malignant	1	237994824	A	T	p.Met4923Leu	c.14767A>T	RYR2	missense_variant	1	0	1	511	0.00587084	0	0.00735294
Malignant	1	237994830	C	A	p.Leu4925Ile	c.14773C>A	RYR2	missense_variant	1	0	1	599	0.00500835	0	0.00735294
Malignant	1	237995900	C	A	p.Pro4953Thr	c.14857C>A	RYR2	missense_variant	1	1	1	529	0.00567108	0	0.00735294
Malignant	2	29416278	G	A	p.Pro1559Ser	c.4675C>T	ALK	missense_variant	1	0	1	1459	0.00548321	0	0.00735294
Malignant	2	29416386	C	G	p.Ala1523Pro	c.4567G>C	ALK	missense_variant	.	.	1	2976	0.00504032	0	0.00735294
Malignant	2	29416481	T	C	p.Lys1491Arg	c.4472A>G	ALK	missense_variant	12	0	1	901	0.00887902	0	0.00735294
Malignant	2	29416753	T	G	p.Glu1400Asp	c.4200A>C	ALK	missense_variant	.	.	1	522	0.00574713	0	0.00735294
Malignant	2	29420417	G	A	p.Pro1355Leu	c.4064C>T	ALK	missense_variant	1	0	1	1693	0.00531601	0	0.00735294
Malignant	2	29420462	T	A	p.Glu1340Val	c.4019A>T	ALK	missense_variant	1	0	1	956	0.00523013	0	0.00735294
Malignant	2	29420551	G	A	.	c.3939-9C>T	ALK	splice_region_variant&intron_variant	.	.	1	606	0.00660066	0	0.00735294
Malignant	2	29443572	C	T	p.Pro1215Pro	c.3645G>A	ALK	splice_region_variant&synonymous_variant	6	0	1	585	0.00683761	0	0.00735294
Malignant	2	29443630	A	T	p.Leu1196Gln	c.3587T>A	ALK	missense_variant	1	0	1	3266	0.00642988	0	0.00735294
Malignant	2	29443687	T	G	p.Gln1177Pro	c.3530A>C	ALK	missense_variant	.	.	1	3995	0.00500626	0	0.00735294
Malignant	2	29445445	C	A	p.Val1130Leu	c.3388G>T	ALK	missense_variant	.	.	1	3388	0.00767414	0	0.00735294
Malignant	2	29451792	C	A	p.Gly925*	c.2773G>T	ALK	stop_gained	1	0	1	553	0.00542495	0	0.00735294
Malignant	2	29451792	C	T	p.Gly925Arg	c.2773G>A	ALK	missense_variant	2	0	1	586	0.00511945	0	0.00735294
Malignant	2	29451944	G	A	.	c.2633-12C>T	ALK	splice_region_variant&intron_variant	.	.	1	597	0.00502513	0	0.00735294
Malignant	2	29455238	G	A	p.Thr855Met	c.2564C>T	ALK	missense_variant	1	0	1	1123	0.00712378	0	0.00735294
Malignant	2	29455314	T	A	p.Met830Leu	c.2488A>T	ALK	missense_variant&splice_region_variant	.	.	1	944	0.00529661	0	0.00735294
Malignant	2	29456413	T	C	.	c.2487+18A>G	ALK	splice_region_variant&intron_variant	.	.	1	755	0.00529801	0	0.00735294
Malignant	2	29456448	C	T	p.Ala824Thr	c.2470G>A	ALK	missense_variant	.	.	1	983	0.00508647	0	0.00735294
Malignant	2	29462643	C	T	p.Arg753Gln	c.2258G>A	ALK	missense_variant	1	0	1	760	0.00789474	0	0.00735294
Malignant	2	29473951	T	G	.	c.2204+20A>C	ALK	splice_region_variant&intron_variant	.	.	1	1077	0.00557103	0	0.00735294
Malignant	2	29473956	C	T	.	c.2204+15G>A	ALK	splice_region_variant&intron_variant	.	.	1	750	0.00666667	0	0.00735294
Malignant	2	29473963	A	G	.	c.2204+8T>C	ALK	splice_region_variant&intron_variant	.	.	1	1040	0.00673077	0	0.00735294
Malignant	2	29473981	C	T	p.Asp732Asn	c.2194G>A	ALK	missense_variant	2	0	1	1045	0.00861244	0	0.00735294
Malignant	2	29497959	C	A	.	c.2041+6G>T	ALK	splice_region_variant&intron_variant	.	.	1	1409	0.00709723	0	0.00735294
Malignant	2	29498023	G	T	p.Asn661Lys	c.1983C>A	ALK	missense_variant	1	1	1	758	0.00527704	0	0.00735294
Malignant	2	29498045	T	G	p.Asn654Thr	c.1961A>C	ALK	missense_variant	1	0	1	1788	0.00671141	0	0.00735294
Malignant	2	29498275	G	T	p.Tyr635*	c.1905C>A	ALK	stop_gained	1	1	1	1523	0.00525279	0	0.00735294
Malignant	2	29519743	A	G	.	c.1817+11T>C	ALK	splice_region_variant&intron_variant	.	.	1	1118	0.00626118	0	0.00735294
Malignant	2	29519941	G	A	.	c.1648-18C>T	ALK	splice_region_variant&intron_variant	.	.	1	506	0.00790514	0	0.00735294
Malignant	2	29543754	G	A	p.?	c.1415-6C>T	ALK	splice_region_variant&intron_variant	1	0	1	985	0.00507614	0	0.00735294
Malignant	2	29551251	T	C	p.Asp460Gly	c.1379A>G	ALK	missense_variant	.	.	1	593	0.00505902	0	0.00735294
Malignant	2	29940490	C	A	p.Trp247Cys	c.741G>T	ALK	missense_variant	2	2	1	585	0.00512821	0	0.00735294
Malignant	2	29940500	T	G	p.Asn244Thr	c.731A>C	ALK	missense_variant	.	.	1	518	0.00579151	0	0.00735294
Malignant	2	30143278	C	A	p.Gly83Val	c.248G>T	ALK	missense_variant	.	.	1	595	0.00840336	0	0.00735294
Malignant	2	50170932	G	A	.	c.4249-3C>T	NRXN1	splice_region_variant&intron_variant	.	.	1	1167	0.00685518	0	0.00735294
Malignant	2	50280421	T	G	p.Glu1412Asp	c.4236A>C	NRXN1	missense_variant	1	0	1	1395	0.00573477	0	0.00735294
Malignant	2	50280531	T	G	p.Thr1376Pro	c.4126A>C	NRXN1	missense_variant	1	0	1	2079	0.00577201	0	0.00735294
Malignant	2	50318448	T	A	.	c.3838+13A>T	NRXN1	splice_region_variant&intron_variant	.	.	1	1239	0.00564972	0	0.00735294
Malignant	2	50463911	T	C	.	c.3666+16A>G	NRXN1	splice_region_variant&intron_variant	.	.	1	784	0.00765306	0	0.00735294
Malignant	2	50463932	G	T	p.His1221Asn	c.3661C>A	NRXN1	missense_variant	2	2	1	1048	0.0124046	0	0.00735294
Malignant	2	50724813	T	G	p.Asn886Thr	c.2657A>C	NRXN1	missense_variant	.	.	1	1487	0.00672495	0	0.00735294
Malignant	2	50724871	T	C	.	c.2618-19A>G	NRXN1	splice_region_variant&intron_variant	.	.	1	549	0.00546448	0	0.00735294
Malignant	2	50733684	G	A	p.Arg856Trp	c.2566C>T	NRXN1	missense_variant	.	.	1	728	0.00549451	0	0.00735294
Malignant	2	50765750	C	T	p.Arg635His	c.1904G>A	NRXN1	missense_variant	.	.	1	1342	0.00596125	0	0.00735294
Malignant	2	50765756	G	A	p.Thr633Met	c.1898C>T	NRXN1	missense_variant	.	.	1	1211	0.00660611	0	0.00735294
Malignant	2	51153061	G	T	.	c.889+15C>A	NRXN1	splice_region_variant&intron_variant	.	.	1	789	0.00633714	0	0.00735294
Malignant	2	51153085	T	C	p.Asn294Asp	c.880A>G	NRXN1	missense_variant	.	.	1	1195	0.00585774	0	0.00735294
Malignant	2	51253527	C	T	p.Ala285Thr	c.853G>A	NRXN1	missense_variant	.	.	1	606	0.00825083	0	0.00735294
Malignant	2	51253593	G	T	p.Leu263Ile	c.787C>A	NRXN1	missense_variant	.	.	1	669	0.00597907	0	0.00735294
Malignant	2	51253596	C	A	p.Gly262Cys	c.784G>T	NRXN1	missense_variant	.	.	1	1896	0.00791139	0	0.00735294
Malignant	2	51254805	T	G	p.Lys203Gln	c.607A>C	NRXN1	missense_variant	.	.	1	17017	0.00652289	0	0.00735294
Malignant	2	51254954	A	C	p.Leu153Arg	c.458T>G	NRXN1	missense_variant	.	.	1	2379	0.00504414	0	0.00735294
Malignant	2	69173444	T	C	p.Glu155Gly	c.464A>G	GKN2	missense_variant	.	.	1	2639	0.00530504	0	0.00735294
Malignant	2	69173570	C	T	p.Ser113Asn	c.338G>A	GKN2	missense_variant	3	0	1	627	0.248804	0	0.00735294
Malignant	2	69174297	C	A	p.Trp99Cys	c.297G>T	GKN2	missense_variant	.	.	1	561	0.00534759	0	0.00735294
Malignant	2	69177415	A	C	.	c.67-20T>G	GKN2	splice_region_variant&intron_variant	.	.	1	1069	0.218896	0	0.00735294
Malignant	2	79312352	A	T	p.Phe164Tyr	c.491T>A	REG1B	missense_variant	1	1	1	596	0.00503356	0	0.00735294
Malignant	2	79312357	G	T	p.Cys162*	c.486C>A	REG1B	stop_gained	.	.	1	797	0.00627353	0	0.00735294
Malignant	2	79312367	G	T	p.Ser159Tyr	c.476C>A	REG1B	missense_variant	1	1	1	629	0.00794913	0	0.00735294
Malignant	2	79312409	C	A	p.Gly145Val	c.434G>T	REG1B	missense_variant&splice_region_variant	1	1	1	615	0.00650407	0	0.00735294
Malignant	2	79312426	A	C	.	c.434-17T>G	REG1B	splice_region_variant&intron_variant	.	.	1	775	0.00516129	0	0.00735294
Malignant	2	79312635	C	A	p.Ser139Ile	c.416G>T	REG1B	missense_variant	1	0	1	1155	0.00606061	0	0.00735294
Malignant	2	79312722	C	T	p.Arg110His	c.329G>A	REG1B	missense_variant	5	0	1	1090	0.00642202	0	0.00735294
Malignant	2	79878673	C	A	.	c.-5-5C>A	CTNNA2	splice_region_variant&intron_variant	.	.	1	659	0.0060698	0	0.00735294
Malignant	2	79878741	G	T	p.Arg20Leu	c.59G>T	CTNNA2	missense_variant	1	1	1	556	0.00539568	0	0.00735294
Malignant	2	79971513	G	T	p.Val35Leu	c.103G>T	CTNNA2	missense_variant&splice_region_variant	1	0	1	803	0.00871731	0	0.00735294
Malignant	2	79971575	G	T	p.Lys55Asn	c.165G>T	CTNNA2	missense_variant	1	1	1	958	0.00939457	0	0.00735294
Malignant	2	79971608	A	C	p.Gln66His	c.198A>C	CTNNA2	missense_variant	2	1	1	977	0.00614125	0	0.00735294
Malignant	2	80085217	C	T	p.Ala126Val	c.377C>T	CTNNA2	missense_variant	3	0	1	2285	0.0083151	0	0.00735294
Malignant	2	80085310	G	A	.	c.465+5G>A	CTNNA2	splice_region_variant&intron_variant	.	.	1	1350	0.00592593	0	0.00735294
Malignant	2	80096942	G	T	p.Val156Leu	c.466G>T	CTNNA2	missense_variant&splice_region_variant	1	1	1	774	0.00516796	0	0.00735294
Malignant	2	80096951	G	T	p.Ala159Ser	c.475G>T	CTNNA2	missense_variant	1	1	1	816	0.00612745	0	0.00735294
Malignant	2	80101281	C	T	p.Thr222Met	c.665C>T	CTNNA2	missense_variant	.	.	1	926	0.00539957	0	0.00735294
Malignant	2	80646555	G	T	.	c.1138-19G>T	CTNNA2	splice_region_variant&intron_variant	.	.	1	637	0.00627943	0	0.00735294
Malignant	2	80782803	G	T	.	c.1541-15G>T	CTNNA2	splice_region_variant&intron_variant	.	.	1	1192	0.00587248	0	0.00735294
Malignant	2	80874848	T	C	p.Ser905Pro	c.2713T>C	CTNNA2	missense_variant	.	.	1	1953	0.00512033	0	0.00735294
Malignant	2	115219672	T	C	p.Met3Thr	c.8T>C	DPP10	missense_variant	.	.	1	625	0.2336	0	0.00735294
Malignant	2	116066869	C	A	p.Leu56Met	c.166C>A	DPP10	missense_variant	1	1	1	603	0.0066335	0	0.00735294
Malignant	2	116101494	T	C	.	c.322+6T>C	DPP10	splice_region_variant&intron_variant	.	.	1	512	0.00585938	0	0.00735294
Malignant	2	116447419	A	C	p.Glu183Asp	c.549A>C	DPP10	missense_variant	1	0	1	825	0.00606061	0	0.00735294
Malignant	2	116447504	G	A	.	c.627+7G>A	DPP10	splice_region_variant&intron_variant	.	.	1	1161	0.00516796	0	0.00735294
Malignant	2	116447510	A	G	.	c.627+13A>G	DPP10	splice_region_variant&intron_variant	.	.	1	693	0.00721501	0	0.00735294
Malignant	2	116485417	A	G	p.Tyr218Cys	c.653A>G	DPP10	missense_variant	1	0	1	698	0.00573066	0	0.00735294
Malignant	2	116485473	G	T	p.Glu237*	c.709G>T	DPP10	stop_gained	1	0	1	549	0.00728597	0	0.00735294
Malignant	2	116485523	C	A	.	c.748+11C>A	DPP10	splice_region_variant&intron_variant	.	.	1	600	0.00833333	0	0.00735294
Malignant	2	116497321	T	C	p.Leu252Pro	c.755T>C	DPP10	missense_variant	1	0	1	2295	0.00653595	0	0.00735294
Malignant	2	116510776	G	T	p.Trp343Leu	c.1028G>T	DPP10	missense_variant	1	0	1	546	0.00549451	0	0.00735294
Malignant	2	116520159	G	T	p.Met379Ile	c.1137G>T	DPP10	missense_variant	1	0	1	545	0.00917431	0	0.00735294
Malignant	2	116525943	G	T	p.Arg412Leu	c.1235G>T	DPP10	missense_variant	1	1	1	769	0.00780234	0	0.00735294
Malignant	2	116525946	G	A	p.Gly413Glu	c.1238G>A	DPP10	missense_variant	.	.	1	1166	0.0051458	0	0.00735294
Malignant	2	116534889	G	A	.	c.1364+14G>A	DPP10	splice_region_variant&intron_variant	.	.	1	1895	0.00527704	0	0.00735294
Malignant	2	116535403	C	A	p.Leu469Met	c.1405C>A	DPP10	missense_variant	2	0	1	758	0.00527704	0	0.00735294
Malignant	2	116535427	G	A	.	c.1412+17G>A	DPP10	splice_region_variant&intron_variant	.	.	1	1309	0.00534759	0	0.00735294
Malignant	2	116538476	G	A	p.Arg480His	c.1439G>A	DPP10	missense_variant	2	0	1	807	0.00619579	0	0.00735294
Malignant	2	116539934	G	T	p.Arg514Met	c.1541G>T	DPP10	missense_variant	1	1	1	789	0.00506971	0	0.00735294
Malignant	2	116539969	C	A	p.Pro526Thr	c.1576C>A	DPP10	missense_variant	.	.	1	897	0.00557414	0	0.00735294
Malignant	2	116548679	T	A	p.Asn535Lys	c.1605T>A	DPP10	missense_variant	1	0	1	514	0.0116732	0	0.00735294
Malignant	2	116548680	T	C	p.Ser536Pro	c.1606T>C	DPP10	missense_variant	.	.	1	555	0.00720721	0	0.00735294
Malignant	2	116548691	G	T	p.Lys539Asn	c.1617G>T	DPP10	missense_variant	1	0	1	528	0.0094697	0	0.00735294
Malignant	2	116548696	C	A	p.Ala541Asp	c.1622C>A	DPP10	missense_variant	1	0	1	533	0.00562852	0	0.00735294
Malignant	2	116548706	G	T	p.Lys544Asn	c.1632G>T	DPP10	missense_variant	1	0	1	529	0.00756144	0	0.00735294
Malignant	2	116548712	G	T	p.Lys546Asn	c.1638G>T	DPP10	missense_variant	1	0	1	654	0.00611621	0	0.00735294
Malignant	2	116548737	C	A	p.Leu555Ile	c.1663C>A	DPP10	missense_variant	1	0	1	553	0.00542495	0	0.00735294
Malignant	2	116548883	C	A	p.Leu568Ile	c.1702C>A	DPP10	missense_variant	.	.	1	589	0.00509338	0	0.00735294
Malignant	2	116572353	A	G	.	c.1752-16A>G	DPP10	splice_region_variant&intron_variant	.	.	1	727	0.00550206	0	0.00735294
Malignant	2	116572357	T	C	.	c.1752-12T>C	DPP10	splice_region_variant&intron_variant	.	.	1	881	0.00567537	0	0.00735294
Malignant	2	116572388	C	A	p.Gln591Lys	c.1771C>A	DPP10	missense_variant	1	1	1	1941	0.00618238	0	0.00735294
Malignant	2	116572475	G	T	p.Gly620*	c.1858G>T	DPP10	stop_gained	2	0	1	755	0.00529801	0	0.00735294
Malignant	2	116572478	A	G	p.Ser621Gly	c.1861A>G	DPP10	missense_variant	1	1	1	855	0.00935673	0	0.00735294
Malignant	2	116572505	C	A	p.Gln630Lys	c.1888C>A	DPP10	missense_variant	1	1	1	771	0.00518807	0	0.00735294
Malignant	2	116572572	A	G	.	c.1946+9A>G	DPP10	splice_region_variant&intron_variant	.	.	1	599	0.00500835	0	0.00735294
Malignant	2	116573238	G	A	.	c.1947-13G>A	DPP10	splice_region_variant&intron_variant	.	.	1	708	0.00564972	0	0.00735294
Malignant	2	116573247	G	A	.	c.1947-4G>A	DPP10	splice_region_variant&intron_variant	.	.	1	698	0.00716332	0	0.00735294
Malignant	2	116573267	C	A	p.Pro655Thr	c.1963C>A	DPP10	missense_variant	.	.	1	740	0.00540541	0	0.00735294
Malignant	2	116593727	C	T	.	c.2002-6C>T	DPP10	splice_region_variant&intron_variant	.	.	1	647	0.00618238	0	0.00735294
Malignant	2	116593758	T	A	p.Met676Lys	c.2027T>A	DPP10	missense_variant	.	.	1	674	0.00593472	0	0.00735294
Malignant	2	116593758	T	C	p.Met676Thr	c.2027T>C	DPP10	missense_variant	1	0	1	1152	0.00607639	0	0.00735294
Malignant	2	116593772	G	T	p.Asp681Tyr	c.2041G>T	DPP10	missense_variant	1	1	1	688	0.00726744	0	0.00735294
Malignant	2	116594114	G	T	p.Met711Ile	c.2133G>T	DPP10	missense_variant	.	.	1	834	0.0059952	0	0.00735294
Malignant	2	116594127	G	T	p.Glu716*	c.2146G>T	DPP10	stop_gained	2	0	1	696	0.00718391	0	0.00735294
Malignant	2	116594236	A	G	.	c.2161-14A>G	DPP10	splice_region_variant&intron_variant	.	.	1	1645	0.00607903	0	0.00735294
Malignant	2	116598319	C	A	.	c.2234-7C>A	DPP10	splice_region_variant&intron_variant	.	.	1	505	0.00594059	0	0.00735294
Malignant	2	116599778	A	G	.	c.2308-9A>G	DPP10	splice_region_variant&intron_variant	.	.	1	1516	0.00659631	0	0.00735294
Malignant	2	116599803	G	T	p.Gly775Val	c.2324G>T	DPP10	missense_variant	.	.	1	788	0.00507614	0	0.00735294
Malignant	2	116599858	C	A	p.Phe793Leu	c.2379C>A	DPP10	missense_variant	.	.	1	590	0.0118644	0	0.00735294
Malignant	2	116599870	T	A	p.Cys797*	c.2391T>A	DPP10	stop_gained	1	0	1	746	0.00670241	0	0.00735294
Malignant	2	116599880	G	T	p.Glu801*	c.2401G>T	DPP10	stop_gained	1	0	1	831	0.00601685	0	0.00735294
Malignant	2	140990769	C	A	p.Glu4596*	c.13786G>T	LRP1B	stop_gained	1	0	1	502	0.0059761	0	0.00735294
Malignant	2	140990778	C	A	p.Gly4593Cys	c.13777G>T	LRP1B	missense_variant	2	0	1	519	0.00963391	0	0.00735294
Malignant	2	140995743	C	A	p.Gly4513Val	c.13538G>T	LRP1B	missense_variant	.	.	1	651	0.00768049	0	0.00735294
Malignant	2	140995763	A	T	p.Asp4506Glu	c.13518T>A	LRP1B	missense_variant	1	0	1	645	0.00775194	0	0.00735294
Malignant	2	140995809	C	A	p.Gly4491Val	c.13472G>T	LRP1B	missense_variant	1	1	1	591	0.00846024	0	0.00735294
Malignant	2	140997030	G	T	p.Leu4466Ile	c.13396C>A	LRP1B	missense_variant	1	0	1	767	0.00521512	0	0.00735294
Malignant	2	140997050	G	T	p.Thr4459Asn	c.13376C>A	LRP1B	missense_variant	1	0	1	502	0.0059761	0	0.00735294
Malignant	2	141027920	A	G	.	c.13143-5T>C	LRP1B	splice_region_variant&intron_variant	.	.	1	911	0.00548847	0	0.00735294
Malignant	2	141031989	T	G	p.?	c.13142+4A>C	LRP1B	splice_region_variant&intron_variant	1	0	1	703	0.00853485	0	0.00735294
Malignant	2	141032029	C	A	p.Cys4369Phe	c.13106G>T	LRP1B	missense_variant	1	0	1	513	0.00584795	0	0.00735294
Malignant	2	141032077	C	A	p.Gly4353Val	c.13058G>T	LRP1B	missense_variant	1	0	1	517	0.00773694	0	0.00735294
Malignant	2	141032086	C	A	p.Arg4350Leu	c.13049G>T	LRP1B	missense_variant	1	1	1	511	0.00782779	0	0.00735294
Malignant	2	141055395	C	A	p.Gly4317*	c.12949G>T	LRP1B	stop_gained	1	0	1	1321	0.00605602	0	0.00735294
Malignant	2	141055554	A	G	.	c.12806-16T>C	LRP1B	splice_region_variant&intron_variant	.	.	1	941	0.0063762	0	0.00735294
Malignant	2	141079523	T	C	.	c.12640+9A>G	LRP1B	splice_region_variant&intron_variant	.	.	1	702	0.00569801	0	0.00735294
Malignant	2	141081447	A	G	.	c.12514+15T>C	LRP1B	splice_region_variant&intron_variant	.	.	1	599	0.00500835	0	0.00735294
Malignant	2	141083394	A	G	p.Ser4093Pro	c.12277T>C	LRP1B	missense_variant	1	0	1	1839	0.00543774	0	0.00735294
Malignant	2	141093221	C	A	p.Gly4027*	c.12079G>T	LRP1B	stop_gained	1	0	1	621	0.00644122	0	0.00735294
Malignant	2	141093224	C	A	p.Ala4026Ser	c.12076G>T	LRP1B	missense_variant	.	.	1	796	0.00628141	0	0.00735294
Malignant	2	141108401	C	A	p.Gly3953Cys	c.11857G>T	LRP1B	missense_variant	1	0	1	582	0.00687285	0	0.00735294
Malignant	2	141108408	C	A	p.Arg3950Ser	c.11850G>T	LRP1B	missense_variant	.	.	1	573	0.0104712	0	0.00735294
Malignant	2	141108409	C	A	p.Arg3950Met	c.11849G>T	LRP1B	missense_variant	2	1	1	572	0.00874126	0	0.00735294
Malignant	2	141108461	C	A	p.Asp3933Tyr	c.11797G>T	LRP1B	missense_variant	1	0	1	625	0.0112	0	0.00735294
Malignant	2	141108480	C	A	p.Met3926Ile	c.11778G>T	LRP1B	missense_variant	2	0	1	608	0.00822368	0	0.00735294
Malignant	2	141108503	G	A	p.His3919Tyr	c.11755C>T	LRP1B	missense_variant	.	.	1	572	0.00699301	0	0.00735294
Malignant	2	141108548	G	T	p.Pro3904Thr	c.11710C>A	LRP1B	missense_variant	1	0	1	517	0.00967118	0	0.00735294
Malignant	2	141110545	C	A	p.Arg3876Ile	c.11627G>T	LRP1B	missense_variant	.	.	1	633	0.00789889	0	0.00735294
Malignant	2	141110548	T	C	p.Glu3875Gly	c.11624A>G	LRP1B	missense_variant	.	.	1	1794	0.00557414	0	0.00735294
Malignant	2	141110617	C	A	p.Gly3852Val	c.11555G>T	LRP1B	missense_variant	1	1	1	661	0.0075643	0	0.00735294
Malignant	2	141113988	C	A	p.Cys3818Phe	c.11453G>T	LRP1B	missense_variant	1	1	1	649	0.00616333	0	0.00735294
Malignant	2	141114037	C	T	p.Glu3802Lys	c.11404G>A	LRP1B	missense_variant	.	.	1	518	0.00579151	0	0.00735294
Malignant	2	141115655	T	G	p.Lys3763Thr	c.11288A>C	LRP1B	missense_variant	.	.	1	793	0.00504414	0	0.00735294
Malignant	2	141130570	C	A	.	c.10768+7G>T	LRP1B	splice_region_variant&intron_variant	.	.	1	598	0.0083612	0	0.00735294
Malignant	2	141130577	C	A	p.Ala3590Ser	c.10768G>T	LRP1B	missense_variant&splice_region_variant	2	0	1	610	0.00983607	0	0.00735294
Malignant	2	141130580	G	T	p.Pro3589Thr	c.10765C>A	LRP1B	missense_variant	2	2	1	741	0.00539811	0	0.00735294
Malignant	2	141130594	T	C	p.Glu3584Gly	c.10751A>G	LRP1B	missense_variant	1	0	1	712	0.00561798	0	0.00735294
Malignant	2	141130642	G	T	p.Ala3568Glu	c.10703C>A	LRP1B	missense_variant	2	0	1	653	0.00612557	0	0.00735294
Malignant	2	141143560	G	T	p.Pro3478His	c.10433C>A	LRP1B	missense_variant	2	1	1	580	0.00517241	0	0.00735294
Malignant	2	141200140	G	T	p.Cys3449*	c.10347C>A	LRP1B	stop_gained	1	0	1	550	0.00727273	0	0.00735294
Malignant	2	141201890	G	T	.	c.10294+9C>A	LRP1B	splice_region_variant&intron_variant	.	.	1	768	0.00651042	0	0.00735294
Malignant	2	141201911	C	A	p.Glu3428*	c.10282G>T	LRP1B	stop_gained	2	0	1	792	0.00631313	0	0.00735294
Malignant	2	141201935	C	T	p.Asp3420Asn	c.10258G>A	LRP1B	missense_variant	.	.	1	525	0.00571429	0	0.00735294
Malignant	2	141201938	G	T	p.Gln3419Lys	c.10255C>A	LRP1B	missense_variant	.	.	1	897	0.00557414	0	0.00735294
Malignant	2	141214013	C	A	.	c.9963+11G>T	LRP1B	splice_region_variant&intron_variant	.	.	1	871	0.00574053	0	0.00735294
Malignant	2	141214169	G	T	p.Ser3273Tyr	c.9818C>A	LRP1B	missense_variant	.	.	1	887	0.00789177	0	0.00735294
Malignant	2	141215080	G	T	p.His3256Asn	c.9766C>A	LRP1B	missense_variant	1	0	1	575	0.00521739	0	0.00735294
Malignant	2	141232821	T	G	p.Thr3171Pro	c.9511A>C	LRP1B	missense_variant	1	0	1	523	0.00573614	0	0.00735294
Malignant	2	141232827	T	C	p.Ile3169Val	c.9505A>G	LRP1B	missense_variant	.	.	1	736	0.00543478	0	0.00735294
Malignant	2	141242897	A	T	.	c.9425+15T>A	LRP1B	splice_region_variant&intron_variant	.	.	1	565	0.00530973	0	0.00735294
Malignant	2	141242930	G	T	p.Ser3136Tyr	c.9407C>A	LRP1B	missense_variant	.	.	1	660	0.00606061	0	0.00735294
Malignant	2	141245284	C	A	p.Asp3049Tyr	c.9145G>T	LRP1B	missense_variant	1	1	1	778	0.00514139	0	0.00735294
Malignant	2	141259256	C	A	p.Lys2950Asn	c.8850G>T	LRP1B	missense_variant	.	.	1	643	0.0124417	0	0.00735294
Malignant	2	141259274	G	T	p.Asp2944Glu	c.8832C>A	LRP1B	missense_variant	1	0	1	710	0.00704225	0	0.00735294
Malignant	2	141259366	C	A	p.Asp2914Tyr	c.8740G>T	LRP1B	missense_variant	.	.	1	830	0.0060241	0	0.00735294
Malignant	2	141259390	T	G	p.Ser2906Arg	c.8716A>C	LRP1B	missense_variant	.	.	1	798	0.00501253	0	0.00735294
Malignant	2	141259428	C	A	p.Ser2893Ile	c.8678G>T	LRP1B	missense_variant	1	0	1	681	0.00587372	0	0.00735294
Malignant	2	141260549	G	T	p.Pro2882Gln	c.8645C>A	LRP1B	missense_variant	.	.	1	839	0.00834327	0	0.00735294
Malignant	2	141272301	T	G	p.Gln2730His	c.8190A>C	LRP1B	missense_variant	2	0	1	627	0.00956938	0	0.00735294
Malignant	2	141272354	C	A	.	c.8150-13G>T	LRP1B	splice_region_variant&intron_variant	.	.	1	541	0.00554529	0	0.00735294
Malignant	2	141283514	C	A	p.Gly2642Val	c.7925G>T	LRP1B	missense_variant	1	1	1	912	0.00877193	0	0.00735294
Malignant	2	141283578	C	A	.	c.7877-16G>T	LRP1B	splice_region_variant&intron_variant	.	.	1	585	0.0136752	0	0.00735294
Malignant	2	141291661	C	A	p.Cys2564Phe	c.7691G>T	LRP1B	missense_variant	2	0	1	802	0.0074813	0	0.00735294
Malignant	2	141291676	C	A	p.Cys2559Phe	c.7676G>T	LRP1B	missense_variant	1	0	1	823	0.00607533	0	0.00735294
Malignant	2	141294168	C	A	p.Glu2542*	c.7624G>T	LRP1B	stop_gained	1	0	1	555	0.00540541	0	0.00735294
Malignant	2	141294271	A	C	p.Asn2507Lys	c.7521T>G	LRP1B	missense_variant	.	.	1	753	0.00929615	0	0.00735294
Malignant	2	141299455	G	T	p.Ala2427Asp	c.7280C>A	LRP1B	missense_variant	.	.	1	1641	0.00670323	0	0.00735294
Malignant	2	141299501	C	A	p.Ala2412Ser	c.7234G>T	LRP1B	missense_variant	1	0	1	558	0.00716846	0	0.00735294
Malignant	2	141457845	C	A	p.Trp2258Leu	c.6773G>T	LRP1B	missense_variant	1	0	1	709	0.00564175	0	0.00735294
Malignant	2	141457864	G	T	p.Gln2252Lys	c.6754C>A	LRP1B	missense_variant	.	.	1	793	0.00882724	0	0.00735294
Malignant	2	141457952	C	A	p.Lys2222Asn	c.6666G>T	LRP1B	missense_variant	1	1	1	530	0.00754717	0	0.00735294
Malignant	2	141457970	C	A	p.Glu2216Asp	c.6648G>T	LRP1B	missense_variant	1	0	1	506	0.00592885	0	0.00735294
Malignant	2	141458005	C	A	p.Glu2205*	c.6613G>T	LRP1B	stop_gained	2	0	1	542	0.00553506	0	0.00735294
Malignant	2	141458022	C	A	p.Ser2199Ile	c.6596G>T	LRP1B	missense_variant	1	0	1	910	0.00549451	0	0.00735294
Malignant	2	141458059	C	A	p.Gly2187Cys	c.6559G>T	LRP1B	missense_variant	1	0	1	949	0.00632244	0	0.00735294
Malignant	2	141459344	C	A	p.Gly2125Cys	c.6373G>T	LRP1B	missense_variant	1	1	1	749	0.00667557	0	0.00735294
Malignant	2	141459833	C	T	p.Arg2060His	c.6179G>A	LRP1B	missense_variant	1	0	1	500	0.006	0	0.00735294
Malignant	2	141473552	G	T	p.Pro2005Thr	c.6013C>A	LRP1B	missense_variant	1	1	1	538	0.00557621	0	0.00735294
Malignant	2	141526785	C	A	p.Ala1919Ser	c.5755G>T	LRP1B	missense_variant	2	0	1	588	0.00510204	0	0.00735294
Malignant	2	141526791	A	C	p.Phe1917Val	c.5749T>G	LRP1B	missense_variant	1	0	1	621	0.00644122	0	0.00735294
Malignant	2	141526933	T	C	.	c.5627-20A>G	LRP1B	splice_region_variant&intron_variant	.	.	1	574	0.00522648	0	0.00735294
Malignant	2	141528465	G	T	p.Arg1871Ser	c.5611C>A	LRP1B	missense_variant	.	.	1	1036	0.00675676	0	0.00735294
Malignant	2	141533723	C	A	p.Arg1815Leu	c.5444G>T	LRP1B	missense_variant	.	.	1	507	0.00788955	0	0.00735294
Malignant	2	141571226	C	A	p.Asp1787Tyr	c.5359G>T	LRP1B	missense_variant&splice_region_variant	1	0	1	595	0.00840336	0	0.00735294
Malignant	2	141598506	C	A	p.Ala1699Ser	c.5095G>T	LRP1B	missense_variant	1	1	1	596	0.00503356	0	0.00735294
Malignant	2	141598632	C	A	p.Asp1657Tyr	c.4969G>T	LRP1B	missense_variant	1	0	1	687	0.00582242	0	0.00735294
Malignant	2	141607671	C	A	p.Asp1647Tyr	c.4939G>T	LRP1B	missense_variant&splice_region_variant	1	1	1	655	0.00763359	0	0.00735294
Malignant	2	141607712	G	T	p.Ala1633Asp	c.4898C>A	LRP1B	missense_variant	.	.	1	769	0.00650195	0	0.00735294
Malignant	2	141607784	G	T	p.Thr1609Asn	c.4826C>A	LRP1B	missense_variant	1	0	1	567	0.00529101	0	0.00735294
Malignant	2	141607884	G	A	p.Leu1576Phe	c.4726C>T	LRP1B	missense_variant	1	0	1	665	0.0075188	0	0.00735294
Malignant	2	141609313	C	A	p.Cys1540Phe	c.4619G>T	LRP1B	missense_variant	1	0	1	680	0.00588235	0	0.00735294
Malignant	2	141625162	G	T	p.Gln1526Lys	c.4576C>A	LRP1B	missense_variant	1	0	1	629	0.0063593	0	0.00735294
Malignant	2	141625371	C	A	p.Gly1456Val	c.4367G>T	LRP1B	missense_variant	1	0	1	1141	0.00613497	0	0.00735294
Malignant	2	141625410	A	C	p.?	c.4335-7T>G	LRP1B	splice_region_variant&intron_variant	7	0	1	1420	0.242254	0	0.00735294
Malignant	2	141625755	G	T	p.Thr1416Asn	c.4247C>A	LRP1B	missense_variant	1	0	1	742	0.00539084	0	0.00735294
Malignant	2	141625771	C	A	p.Gly1411Cys	c.4231G>T	LRP1B	missense_variant	2	0	1	747	0.00669344	0	0.00735294
Malignant	2	141625831	T	A	p.Ile1391Phe	c.4171A>T	LRP1B	missense_variant	.	.	1	605	0.00661157	0	0.00735294
Malignant	2	141641466	T	G	p.Lys1363Asn	c.4089A>C	LRP1B	missense_variant	1	0	1	1142	0.00525394	0	0.00735294
Malignant	2	141660469	C	A	.	c.3766+20G>T	LRP1B	splice_region_variant&intron_variant	.	.	1	844	0.00592417	0	0.00735294
Malignant	2	141660511	G	T	p.Asp1248Glu	c.3744C>A	LRP1B	missense_variant	.	.	1	686	0.0058309	0	0.00735294
Malignant	2	141660749	G	A	.	c.3521-15C>T	LRP1B	splice_region_variant&intron_variant	.	.	1	649	0.00770416	0	0.00735294
Malignant	2	141665646	C	T	p.Gly1107Glu	c.3320G>A	LRP1B	missense_variant&splice_region_variant	1	0	1	645	0.00620155	0	0.00735294
Malignant	2	141707841	G	T	p.Asp1033Glu	c.3099C>A	LRP1B	missense_variant	1	0	1	768	0.00520833	0	0.00735294
Malignant	2	141707900	A	G	p.Ser1014Pro	c.3040T>C	LRP1B	missense_variant	.	.	1	886	0.00564334	0	0.00735294
Malignant	2	141707983	C	T	.	c.2969-12G>A	LRP1B	splice_region_variant&intron_variant	.	.	1	908	0.20815	0	0.00735294
Malignant	2	141747101	C	A	p.Ala924Ser	c.2770G>T	LRP1B	missense_variant&splice_region_variant	1	1	1	598	0.00501672	0	0.00735294
Malignant	2	141747203	G	T	p.Gln890Lys	c.2668C>A	LRP1B	missense_variant	1	1	1	587	0.00511073	0	0.00735294
Malignant	2	141751566	C	A	p.Cys881Phe	c.2642G>T	LRP1B	missense_variant&splice_region_variant	1	1	1	914	0.00547046	0	0.00735294
Malignant	2	141751591	C	A	p.Gly873*	c.2617G>T	LRP1B	stop_gained	1	0	1	925	0.00540541	0	0.00735294
Malignant	2	141751609	C	A	p.Asp867Tyr	c.2599G>T	LRP1B	missense_variant	1	0	1	932	0.00536481	0	0.00735294
Malignant	2	141751631	T	G	p.Gln859His	c.2577A>C	LRP1B	missense_variant	1	0	1	1050	0.00571429	0	0.00735294
Malignant	2	141751701	T	G	p.Asn836Thr	c.2507A>C	LRP1B	missense_variant	.	.	1	606	0.00660066	0	0.00735294
Malignant	2	141762940	T	A	p.Asn823Tyr	c.2467A>T	LRP1B	missense_variant	.	.	1	596	0.00503356	0	0.00735294
Malignant	2	141763015	A	G	p.Cys798Arg	c.2392T>C	LRP1B	missense_variant	.	.	1	928	0.00538793	0	0.00735294
Malignant	2	141771113	G	T	.	c.2380+12C>A	LRP1B	splice_region_variant&intron_variant	.	.	1	522	0.00766284	0	0.00735294
Malignant	2	141771128	G	T	p.Gln793Lys	c.2377C>A	LRP1B	missense_variant	.	.	1	542	0.00922509	0	0.00735294
Malignant	2	141771195	C	A	p.Glu770Asp	c.2310G>T	LRP1B	missense_variant	1	0	1	636	0.00628931	0	0.00735294
Malignant	2	141771226	G	A	p.Ser760Phe	c.2279C>T	LRP1B	missense_variant	.	.	1	713	0.0056101	0	0.00735294
Malignant	2	141773396	G	T	p.Gln687Lys	c.2059C>A	LRP1B	missense_variant	1	1	1	898	0.00668151	0	0.00735294
Malignant	2	141773473	C	A	p.Trp661Leu	c.1982G>T	LRP1B	missense_variant	1	1	1	696	0.0114943	0	0.00735294
Malignant	2	141777513	T	A	p.Ile650Phe	c.1948A>T	LRP1B	missense_variant	1	0	1	593	0.00505902	0	0.00735294
Malignant	2	141777516	C	A	p.Gly649*	c.1945G>T	LRP1B	stop_gained	1	0	1	607	0.00823723	0	0.00735294
Malignant	2	141806681	G	T	p.Leu555Met	c.1663C>A	LRP1B	missense_variant	1	0	1	541	0.00739372	0	0.00735294
Malignant	2	141806747	C	A	p.Gly533*	c.1597G>T	LRP1B	stop_gained	1	0	1	785	0.00509554	0	0.00735294
Malignant	2	141816508	A	T	p.Ile451Asn	c.1352T>A	LRP1B	missense_variant	.	.	1	774	0.00516796	0	0.00735294
Malignant	2	141816546	C	A	p.Arg438Ser	c.1314G>T	LRP1B	missense_variant	1	0	1	742	0.0107817	0	0.00735294
Malignant	2	141816551	C	A	p.Val437Leu	c.1309G>T	LRP1B	missense_variant	.	.	1	731	0.00547196	0	0.00735294
Malignant	2	141816577	G	T	p.Ala428Glu	c.1283C>A	LRP1B	missense_variant	1	0	1	661	0.00605144	0	0.00735294
Malignant	2	141816617	G	T	p.His415Asn	c.1243C>A	LRP1B	missense_variant	1	1	1	806	0.00620347	0	0.00735294
Malignant	2	141819741	G	A	p.Pro372Leu	c.1115C>T	LRP1B	missense_variant	.	.	1	1628	0.00614251	0	0.00735294
Malignant	2	141819783	C	T	p.Gly358Glu	c.1073G>A	LRP1B	missense_variant	1	0	1	844	0.00592417	0	0.00735294
Malignant	2	141945971	A	G	.	c.1013+19T>C	LRP1B	splice_region_variant&intron_variant	.	.	1	679	0.00589102	0	0.00735294
Malignant	2	141946065	T	G	p.Asn313Thr	c.938A>C	LRP1B	missense_variant	.	.	1	921	0.00542888	0	0.00735294
Malignant	2	141986758	A	C	p.Phe282Val	c.844T>G	LRP1B	missense_variant	.	.	1	500	0.006	0	0.00735294
Malignant	2	141986802	G	T	p.Ala267Glu	c.800C>A	LRP1B	missense_variant	1	1	1	1697	0.00530348	0	0.00735294
Malignant	2	141986805	T	G	p.Lys266Thr	c.797A>C	LRP1B	missense_variant	.	.	1	629	0.0063593	0	0.00735294
Malignant	2	141986919	C	A	p.Ser228Ile	c.683G>T	LRP1B	missense_variant	.	.	1	654	0.00764526	0	0.00735294
Malignant	2	141986947	G	A	p.Leu219Phe	c.655C>T	LRP1B	missense_variant	1	0	1	560	0.00535714	0	0.00735294
Malignant	2	141986957	C	A	p.Glu215Asp	c.645G>T	LRP1B	missense_variant	1	1	1	600	0.01	0	0.00735294
Malignant	2	141986959	C	A	p.Glu215*	c.643G>T	LRP1B	stop_gained	2	0	1	597	0.00837521	0	0.00735294
Malignant	2	142012071	G	T	.	c.463+20C>A	LRP1B	splice_region_variant&intron_variant	.	.	1	534	0.00561798	0	0.00735294
Malignant	2	142012141	C	A	p.Cys138Phe	c.413G>T	LRP1B	missense_variant	1	1	1	621	0.00644122	0	0.00735294
Malignant	2	142567990	G	A	.	c.83-20C>T	LRP1B	splice_region_variant&intron_variant	.	.	1	542	0.00553506	0	0.00735294
Malignant	2	167262099	G	T	p.Ser1680Arg	c.5040C>A	SCN7A	missense_variant	.	.	1	833	0.00960384	0	0.00735294
Malignant	2	167262193	G	T	p.Ser1649*	c.4946C>A	SCN7A	stop_gained	.	.	1	1280	0.00625	0	0.00735294
Malignant	2	167262244	A	C	p.Ile1632Ser	c.4895T>G	SCN7A	missense_variant	.	.	1	1426	0.00771388	0	0.00735294
Malignant	2	167262316	G	T	p.Pro1608His	c.4823C>A	SCN7A	missense_variant	.	.	1	1582	0.00695322	0	0.00735294
Malignant	2	167262356	C	T	p.Val1595Ile	c.4783G>A	SCN7A	missense_variant	.	.	1	854	0.0058548	0	0.00735294
Malignant	2	167262436	A	C	p.Val1568Gly	c.4703T>G	SCN7A	missense_variant	.	.	1	2841	0.0063358	0	0.00735294
Malignant	2	167262686	G	T	p.Leu1485Met	c.4453C>A	SCN7A	missense_variant	.	.	1	937	0.00533618	0	0.00735294
Malignant	2	167262688	C	A	p.Trp1484Leu	c.4451G>T	SCN7A	missense_variant	1	1	1	792	0.00505051	0	0.00735294
Malignant	2	167266176	T	C	p.Thr1327Thr	c.3981A>G	SCN7A	splice_region_variant&synonymous_variant	.	.	1	913	0.00547645	0	0.00735294
Malignant	2	167266219	G	T	p.Ala1313Glu	c.3938C>A	SCN7A	missense_variant	.	.	1	557	0.005386	0	0.00735294
Malignant	2	167266302	C	A	p.Trp1285Cys	c.3855G>T	SCN7A	missense_variant	.	.	1	679	0.00589102	0	0.00735294
Malignant	2	167269141	T	C	p.Met1169Val	c.3505A>G	SCN7A	missense_variant	.	.	1	532	0.0075188	0	0.00735294
Malignant	2	167273230	G	T	p.Ser1134Tyr	c.3401C>A	SCN7A	missense_variant	.	.	1	801	0.00873908	0	0.00735294
Malignant	2	167277761	G	A	p.Pro1025Leu	c.3074C>T	SCN7A	missense_variant	.	.	1	1184	0.00591216	0	0.00735294
Malignant	2	167279801	C	A	p.Gly999Cys	c.2995G>T	SCN7A	missense_variant	2	0	1	742	0.0107817	0	0.00735294
Malignant	2	167279824	C	A	p.Gly991Val	c.2972G>T	SCN7A	missense_variant	.	.	1	529	0.0094518	0	0.00735294
Malignant	2	167279836	C	A	p.Trp987Leu	c.2960G>T	SCN7A	missense_variant	1	0	1	523	0.00573614	0	0.00735294
Malignant	2	167279847	C	A	p.Met983Ile	c.2949G>T	SCN7A	missense_variant	.	.	1	604	0.00662252	0	0.00735294
Malignant	2	167284465	A	C	.	c.2699-13T>G	SCN7A	splice_region_variant&intron_variant	.	.	1	725	0.00551724	0	0.00735294
Malignant	2	167288810	G	T	.	c.2592+18C>A	SCN7A	splice_region_variant&intron_variant	.	.	1	658	0.0136778	0	0.00735294
Malignant	2	167289013	C	A	p.Asp803Tyr	c.2407G>T	SCN7A	missense_variant	1	0	1	701	0.0085592	0	0.00735294
Malignant	2	167289039	G	T	p.Thr794Asn	c.2381C>A	SCN7A	missense_variant	.	.	1	1014	0.00591716	0	0.00735294
Malignant	2	167289117	C	A	p.Cys768Phe	c.2303G>T	SCN7A	missense_variant	.	.	1	681	0.00587372	0	0.00735294
Malignant	2	167289159	C	A	p.Arg754Ile	c.2261G>T	SCN7A	missense_variant	1	0	1	978	0.00511247	0	0.00735294
Malignant	2	167289204	G	T	p.Ala739Asp	c.2216C>A	SCN7A	missense_variant	1	1	1	526	0.00760456	0	0.00735294
Malignant	2	167289215	C	A	p.Lys735Asn	c.2205G>T	SCN7A	missense_variant	.	.	1	536	0.00559701	0	0.00735294
Malignant	2	167297964	G	T	p.Ala700Glu	c.2099C>A	SCN7A	missense_variant	2	0	1	1155	0.00606061	0	0.00735294
Malignant	2	167300066	C	A	p.Glu583*	c.1747G>T	SCN7A	stop_gained	1	0	1	601	0.00998336	0	0.00735294
Malignant	2	167301285	T	C	p.Asn538Ser	c.1613A>G	SCN7A	missense_variant	.	.	1	563	0.0053286	0	0.00735294
Malignant	2	167301322	G	T	p.His526Asn	c.1576C>A	SCN7A	missense_variant	1	1	1	567	0.00705467	0	0.00735294
Malignant	2	167301323	C	A	p.Glu525Asp	c.1575G>T	SCN7A	missense_variant	1	0	1	572	0.00524476	0	0.00735294
Malignant	2	167301326	C	A	p.Leu524Phe	c.1572G>T	SCN7A	missense_variant	1	1	1	582	0.00515464	0	0.00735294
Malignant	2	167301356	G	T	p.Cys514*	c.1542C>A	SCN7A	stop_gained	.	.	1	725	0.00551724	0	0.00735294
Malignant	2	167301408	A	G	p.Phe497Ser	c.1490T>C	SCN7A	missense_variant	.	.	1	1072	0.00559701	0	0.00735294
Malignant	2	167301492	T	G	p.Lys469Thr	c.1406A>C	SCN7A	missense_variant	1	0	1	1586	0.0119798	0	0.00735294
Malignant	2	167304192	C	A	p.Lys439Asn	c.1317G>T	SCN7A	missense_variant	1	0	1	979	0.00510725	0	0.00735294
Malignant	2	167313373	T	C	.	c.1290+7A>G	SCN7A	splice_region_variant&intron_variant	.	.	1	951	0.00525762	0	0.00735294
Malignant	2	167313506	C	A	p.Leu388Phe	c.1164G>T	SCN7A	missense_variant	1	0	1	519	0.00578035	0	0.00735294
Malignant	2	167313514	C	A	p.Ala386Ser	c.1156G>T	SCN7A	missense_variant	.	.	1	558	0.00537634	0	0.00735294
Malignant	2	167313554	T	C	p.Ile372Met	c.1116A>G	SCN7A	missense_variant	.	.	1	778	0.00642674	0	0.00735294
Malignant	2	167321990	C	A	p.Gly308Val	c.923G>T	SCN7A	missense_variant	1	0	1	594	0.00505051	0	0.00735294
Malignant	2	167322015	C	A	p.Gly300*	c.898G>T	SCN7A	stop_gained	3	0	1	634	0.0141956	0	0.00735294
Malignant	2	167322050	C	T	.	c.872-9G>A	SCN7A	splice_region_variant&intron_variant	.	.	1	740	0.00540541	0	0.00735294
Malignant	2	167327163	C	A	p.Arg209Ile	c.626G>T	SCN7A	missense_variant	2	0	1	651	0.00921659	0	0.00735294
Malignant	2	167327216	C	A	p.Glu191Asp	c.573G>T	SCN7A	missense_variant&splice_region_variant	2	2	1	1109	0.00541028	0	0.00735294
Malignant	2	167327222	G	A	.	c.573-6C>T	SCN7A	splice_region_variant&intron_variant	.	.	1	843	0.0059312	0	0.00735294
Malignant	2	167328948	A	C	p.Leu151Val	c.451T>G	SCN7A	missense_variant	.	.	1	835	0.00598802	0	0.00735294
Malignant	2	167330370	C	T	p.Val128Ile	c.382G>A	SCN7A	missense_variant	.	.	1	1284	0.00545171	0	0.00735294
Malignant	2	167330737	G	T	p.Pro118Thr	c.352C>A	SCN7A	missense_variant	.	.	1	896	0.00558036	0	0.00735294
Malignant	2	167333975	T	A	p.Asn78Tyr	c.232A>T	SCN7A	missense_variant&splice_region_variant	1	0	1	610	0.00655738	0	0.00735294
Malignant	2	167334085	G	T	p.Thr41Asn	c.122C>A	SCN7A	missense_variant	3	0	1	906	0.00772627	0	0.00735294
Malignant	2	167334199	G	T	p.Ala3Asp	c.8C>A	SCN7A	missense_variant	1	0	1	533	0.00562852	0	0.00735294
Malignant	2	167334200	C	A	p.Ala3Ser	c.7G>T	SCN7A	missense_variant	.	.	1	741	0.00539811	0	0.00735294
Malignant	2	178095695	T	A	p.Asn546Tyr	c.1636A>T	NFE2L2	missense_variant	.	.	1	1033	0.00580833	0	0.00735294
Malignant	2	178095718	T	G	p.Lys538Thr	c.1613A>C	NFE2L2	missense_variant	1	0	1	1068	0.00561798	0	0.00735294
Malignant	2	178095793	T	A	p.Asn513Ile	c.1538A>T	NFE2L2	missense_variant	1	1	1	780	0.00512821	0	0.00735294
Malignant	2	178095827	G	A	p.Arg502Cys	c.1504C>T	NFE2L2	missense_variant	2	0	1	1085	0.00552995	0	0.00735294
Malignant	2	178096168	A	G	p.Val388Ala	c.1163T>C	NFE2L2	missense_variant	.	.	1	676	0.00739645	0	0.00735294
Malignant	2	178096325	T	C	p.Thr336Ala	c.1006A>G	NFE2L2	missense_variant	.	.	1	1547	0.0051713	0	0.00735294
Malignant	2	178096552	G	A	p.Thr260Ile	c.779C>T	NFE2L2	missense_variant	.	.	1	1109	0.00541028	0	0.00735294
Malignant	2	178096664	C	A	p.Val223Phe	c.667G>T	NFE2L2	missense_variant	.	.	1	561	0.00534759	0	0.00735294
Malignant	2	178096694	C	A	p.Val213Phe	c.637G>T	NFE2L2	missense_variant	.	.	1	547	0.00731261	0	0.00735294
Malignant	2	178097307	G	C	p.Ser136Cys	c.407C>G	NFE2L2	missense_variant	1	1	1	931	0.00537057	0	0.00735294
Malignant	2	178097967	T	C	.	c.402+11A>G	NFE2L2	splice_region_variant&intron_variant	.	.	1	570	0.00701754	0	0.00735294
Malignant	2	178098789	T	G	p.Ile86Leu	c.256A>C	NFE2L2	missense_variant	2	0	1	1056	0.00568182	0	0.00735294
Malignant	2	178098948	T	G	p.Ser33Arg	c.97A>C	NFE2L2	missense_variant	2	0	1	1668	0.0059952	0	0.00735294
Malignant	2	179633400	C	A	p.Ala3055Ser	c.9163G>T	TTN	missense_variant&splice_region_variant	1	0	1	1094	0.00639854	0	0.00735294
Malignant	2	179633429	G	T	p.Ala3045Glu	c.9134C>A	TTN	missense_variant	1	0	1	787	0.00508259	0	0.00735294
Malignant	2	179633430	C	A	p.Ala3045Ser	c.9133G>T	TTN	missense_variant	1	0	1	866	0.00577367	0	0.00735294
Malignant	2	179633439	C	A	p.Ala3042Ser	c.9124G>T	TTN	missense_variant	.	.	1	1264	0.00553797	0	0.00735294
Malignant	2	179633490	G	C	p.Leu3025Val	c.9073C>G	TTN	missense_variant	.	.	1	795	0.00628931	0	0.00735294
Malignant	2	179633632	G	T	p.Asp2977Glu	c.8931C>A	TTN	missense_variant	1	0	1	823	0.0072904	0	0.00735294
Malignant	2	179633643	T	C	p.Met2974Val	c.8920A>G	TTN	missense_variant	.	.	1	602	0.00664452	0	0.00735294
Malignant	2	179666900	C	A	p.Gly87Val	c.260G>T	TTN	missense_variant	1	0	1	1958	0.00868233	0	0.00735294
Malignant	2	179666903	G	T	p.Ser86Tyr	c.257C>A	TTN	missense_variant	.	.	1	1983	0.00554715	0	0.00735294
Malignant	2	179666918	T	G	p.Lys81Thr	c.242A>C	TTN	missense_variant	2	0	1	2127	0.00611189	0	0.00735294
Malignant	2	179666976	G	A	p.Arg62Cys	c.184C>T	TTN	missense_variant	1	1	1	1141	0.00525855	0	0.00735294
Malignant	2	179667012	T	G	p.Thr50Pro	c.148A>C	TTN	missense_variant	.	.	1	1059	0.00661001	0	0.00735294
Malignant	2	209113113	G	T	p.Arg132Ser	c.394C>A	IDH1	missense_variant	176	0	1	860	0.00581395	0	0.00735294
Malignant	2	212578299	T	A	p.Ile320Phe	c.958A>T	ERBB4	missense_variant	1	0	1	557	0.00718133	0	0.00735294
Malignant	2	212578317	C	A	p.Glu314*	c.940G>T	ERBB4	stop_gained	1	0	1	545	0.00550459	0	0.00735294
Malignant	2	212578370	T	G	p.Asn296Thr	c.887A>C	ERBB4	missense_variant	1	0	1	587	0.00681431	0	0.00735294
Malignant	2	212578371	T	G	p.Asn296His	c.886A>C	ERBB4	missense_variant&splice_region_variant	1	0	1	587	0.00681431	0	0.00735294
Malignant	2	212587144	C	A	p.Gly286Val	c.857G>T	ERBB4	missense_variant	1	0	1	589	0.00679117	0	0.00735294
Malignant	2	212587172	G	T	p.His277Asn	c.829C>A	ERBB4	missense_variant	1	0	1	562	0.00533808	0	0.00735294
Malignant	2	212587186	G	A	p.Thr272Ile	c.815C>T	ERBB4	missense_variant	1	0	1	926	0.00539957	0	0.00735294
Malignant	2	212589804	G	T	p.Cys246*	c.738C>A	ERBB4	stop_gained	4	0	1	766	0.00522193	0	0.00735294
Malignant	2	212652734	G	T	.	c.556+16C>A	ERBB4	splice_region_variant&intron_variant	.	.	1	1175	0.00510638	0	0.00735294
Malignant	2	212652753	C	T	p.Gly185Arg	c.553G>A	ERBB4	missense_variant	.	.	1	674	0.00593472	0	0.00735294
Malignant	2	234669144	G	A	p.Gly71Arg	c.211G>A	UGT1A1	missense_variant	2	0	1	2309	0.00866176	0	0.00735294
Malignant	3	10183794	G	A	p.Trp88*	c.263G>A	VHL	stop_gained	14	0	1	984	0.0050813	0	0.00735294
Malignant	3	10183824	A	C	p.Tyr98Ser	c.293A>C	VHL	missense_variant	1	0	1	2761	0.00507063	0	0.00735294
Malignant	3	10183854	G	A	p.Arg108His	c.323G>A	VHL	missense_variant	.	.	1	552	0.00905797	0	0.00735294
Malignant	3	10188195	T	G	.	c.341-3T>G	VHL	splice_region_variant&intron_variant	.	.	1	800	0.00625	0	0.00735294
Malignant	3	10188214	C	A	p.Phe119Leu	c.357C>A	VHL	missense_variant	2	0	1	546	0.00549451	0	0.00735294
Malignant	3	10188240	T	G	p.Leu128Arg	c.383T>G	VHL	missense_variant	3	0	1	1130	0.00530973	0	0.00735294
Malignant	3	10188253	A	C	p.Gln132His	c.396A>C	VHL	missense_variant	1	0	1	1558	0.00641849	0	0.00735294
Malignant	3	10188287	G	T	p.Gly144*	c.430G>T	VHL	stop_gained	7	0	1	565	0.00530973	0	0.00735294
Malignant	3	10188288	G	A	p.Gly144Glu	c.431G>A	VHL	missense_variant	2	0	1	752	0.00664894	0	0.00735294
Malignant	3	10188303	C	A	p.Ala149Asp	c.446C>A	VHL	missense_variant	1	0	1	987	0.00506586	0	0.00735294
Malignant	3	10188323	A	C	p.?	c.463+3A>C	VHL	splice_region_variant&intron_variant	1	0	1	818	0.00733496	0	0.00735294
Malignant	3	10191488	C	T	p.Arg161*	c.481C>T	VHL	stop_gained	32	0	1	555	0.00720721	0	0.00735294
Malignant	3	10191495	T	C	p.Leu163Pro	c.488T>C	VHL	missense_variant	5	0	1	871	0.00574053	0	0.00735294
Malignant	3	10191507	G	A	p.Arg167Gln	c.500G>A	VHL	missense_variant	10	0	1	800	0.00625	0	0.00735294
Malignant	3	10191548	G	A	p.Val181Ile	c.541G>A	VHL	missense_variant	1	0	1	583	0.00686106	0	0.00735294
Malignant	3	37067195	C	A	p.Ser369Tyr	c.1106C>A	MLH1	missense_variant	1	0	1	2226	0.00584007	0	0.00735294
Malignant	3	37067281	C	T	p.Gln398*	c.1192C>T	MLH1	stop_gained	1	0	1	593	0.00505902	0	0.00735294
Malignant	3	41265567	C	A	p.Thr3Asn	c.8C>A	CTNNB1	missense_variant	.	.	1	551	0.00544465	0	0.00735294
Malignant	3	41266007	G	A	.	c.14-10G>A	CTNNB1	splice_region_variant&intron_variant	.	.	1	1118	0.00626118	0	0.00735294
Malignant	3	41266074	A	G	p.His24Arg	c.71A>G	CTNNB1	missense_variant	1	0	1	599	0.00500835	0	0.00735294
Malignant	3	41266155	A	G	p.Asn51Ser	c.152A>G	CTNNB1	missense_variant	1	0	1	1069	0.00561272	0	0.00735294
Malignant	3	41266527	G	T	p.Gln108His	c.324G>T	CTNNB1	missense_variant	1	0	1	1767	0.00565931	0	0.00735294
Malignant	3	41268717	G	A	p.Gly319Ser	c.955G>A	CTNNB1	missense_variant	2	0	1	546	0.00549451	0	0.00735294
Malignant	3	41268746	G	T	p.Met328Ile	c.984G>T	CTNNB1	missense_variant	1	1	1	825	0.00606061	0	0.00735294
Malignant	3	41275669	G	A	p.Ala522Thr	c.1564G>A	CTNNB1	missense_variant	3	0	1	2807	0.00534378	0	0.00735294
Malignant	3	41275757	C	A	p.Thr551Lys	c.1652C>A	CTNNB1	missense_variant	1	0	1	2181	0.00504356	0	0.00735294
Malignant	3	41275769	G	A	p.Gly555Glu	c.1664G>A	CTNNB1	missense_variant	.	.	1	560	0.00535714	0	0.00735294
Malignant	3	41277321	C	A	p.Pro597Gln	c.1790C>A	CTNNB1	missense_variant	1	0	1	904	0.00663717	0	0.00735294
Malignant	3	41278079	C	T	p.Ala652Val	c.1955C>T	CTNNB1	missense_variant	1	0	1	727	0.00550206	0	0.00735294
Malignant	3	41278115	A	G	p.Glu664Gly	c.1991A>G	CTNNB1	missense_variant	.	.	1	570	0.00526316	0	0.00735294
Malignant	3	41280658	A	C	p.Tyr724Ser	c.2171A>C	CTNNB1	missense_variant	2	0	1	1688	0.00592417	0	0.00735294
Malignant	3	47058655	C	A	p.Lys2541Asn	c.7623G>T	SETD2	missense_variant	1	0	1	1099	0.00636943	0	0.00735294
Malignant	3	47058705	T	C	p.Lys2525Glu	c.7573A>G	SETD2	missense_variant	.	.	1	597	0.00502513	0	0.00735294
Malignant	3	47059132	C	T	p.Arg2510His	c.7529G>A	SETD2	missense_variant	1	0	1	538	0.00557621	0	0.00735294
Malignant	3	47059214	C	T	p.Val2483Ile	c.7447G>A	SETD2	missense_variant	1	0	1	773	0.00517464	0	0.00735294
Malignant	3	47059217	T	C	p.Ile2482Val	c.7444A>G	SETD2	missense_variant	.	.	1	574	0.00522648	0	0.00735294
Malignant	3	47059225	G	A	p.Ser2479Phe	c.7436C>T	SETD2	missense_variant	1	0	1	504	0.00595238	0	0.00735294
Malignant	3	47061265	T	G	p.Glu2472Asp	c.7416A>C	SETD2	missense_variant	.	.	1	530	0.00566038	0	0.00735294
Malignant	3	47061303	C	T	p.Ala2460Thr	c.7378G>A	SETD2	missense_variant	1	0	1	839	0.00595948	0	0.00735294
Malignant	3	47061326	G	A	p.Ser2452Leu	c.7355C>T	SETD2	missense_variant	1	0	1	729	0.00548697	0	0.00735294
Malignant	3	47079233	G	A	p.Pro2425Ser	c.7273C>T	SETD2	missense_variant	1	0	1	1196	0.00501672	0	0.00735294
Malignant	3	47084108	T	G	p.Asn2394Thr	c.7181A>C	SETD2	missense_variant	.	.	1	1015	0.00591133	0	0.00735294
Malignant	3	47088086	T	C	p.Tyr2330Cys	c.6989A>G	SETD2	missense_variant	.	.	1	943	0.00530223	0	0.00735294
Malignant	3	47098295	T	A	.	c.6963+16A>T	SETD2	splice_region_variant&intron_variant	.	.	1	1045	0.00574163	0	0.00735294
Malignant	3	47103716	C	T	p.Arg2077Gln	c.6230G>A	SETD2	missense_variant	3	0	1	914	0.00547046	0	0.00735294
Malignant	3	47103747	T	A	p.Lys2067*	c.6199A>T	SETD2	stop_gained	1	1	1	586	0.00511945	0	0.00735294
Malignant	3	47108545	T	C	.	c.6109+15A>G	SETD2	splice_region_variant&intron_variant	.	.	1	1172	0.00511945	0	0.00735294
Malignant	3	47108563	T	C	p.Thr2036Ala	c.6106A>G	SETD2	missense_variant	.	.	1	582	0.00515464	0	0.00735294
Malignant	3	47125211	T	C	p.Lys2020Arg	c.6059A>G	SETD2	missense_variant&splice_region_variant	1	0	1	1061	0.00659755	0	0.00735294
Malignant	3	47125222	C	A	p.Trp2016Cys	c.6048G>T	SETD2	missense_variant	3	2	1	643	0.00777605	0	0.00735294
Malignant	3	47125244	G	T	p.Ala2009Asp	c.6026C>A	SETD2	missense_variant	.	.	1	750	0.00666667	0	0.00735294
Malignant	3	47125251	C	A	p.Asp2007Tyr	c.6019G>T	SETD2	missense_variant	1	0	1	759	0.00658762	0	0.00735294
Malignant	3	47125356	C	A	p.Glu1972*	c.5914G>T	SETD2	stop_gained	1	0	1	969	0.00722394	0	0.00735294
Malignant	3	47125357	T	G	p.Glu1971Asp	c.5913A>C	SETD2	missense_variant	1	1	1	814	0.00737101	0	0.00735294
Malignant	3	47125367	G	T	p.Thr1968Lys	c.5903C>A	SETD2	missense_variant	1	0	1	984	0.0050813	0	0.00735294
Malignant	3	47125380	C	A	p.Glu1964*	c.5890G>T	SETD2	stop_gained	1	0	1	994	0.00503018	0	0.00735294
Malignant	3	47125509	C	A	p.Glu1921*	c.5761G>T	SETD2	stop_gained	1	0	1	968	0.0072314	0	0.00735294
Malignant	3	47125878	T	A	.	c.5398-6A>T	SETD2	splice_region_variant&intron_variant	.	.	1	808	0.00618812	0	0.00735294
Malignant	3	47127666	A	G	.	c.5397+19T>C	SETD2	splice_region_variant&intron_variant	.	.	1	787	0.00508259	0	0.00735294
Malignant	3	47129617	G	T	p.Leu1755Met	c.5263C>A	SETD2	missense_variant	1	0	1	1234	0.00567261	0	0.00735294
[truncated: 1,776 more rows]

## Sheet: Benign_specific
clinical	chr	position	ref	alt	HGVS_P	HGVS_C	gene	variant_type	COSMIC_CNT	CNT_LUNG	No. Samples	Average Depth	Avg MAF	SD	% Occurrence
[truncated: 787 more rows]
